# Supplementary material for: Analysis of phytoplasma-responsive sRNAs provide insight into the pathogenic mechanisms of mulberry yellow dwarf disease
Source: PubMed Central journal article supplement — Sci Rep. 2014 Jun 20;4:5378. doi: 10.1038/srep05378 (PMC5381547; doi:10.1038/srep05378), 2014-06-20
Supplement: srep05378-s1.pdf [file srep05378-s1.pdf]

## Analysis of phytoplasma-responsive sRNAs provide insight into the pathogenic mechanisms of mulberry yellow dwarf disease

Ying-Ping Gai, Yi-Qun Li, Fang-Yue Guo, Chuan-Zhong Yuan, Yao-Yao Mo, Hua-Liang Zhang, Hong Wang and Xian-Ling Ji

### Supplementary Text. Expression profiling of siRNAs in mulberry

| siR-name   | Normalized value (Healthy leaf ) | Normalized value (Infected leaf ) | Fold-change (log2 Infected leaf/Healthy leaf) | P-value     | Significance lable |
|------------|----------------------------------|-----------------------------------|-----------------------------------------------|-------------|--------------------|
| siR_1000   | 14.2154                          | 21.444                            | 0.59311935                                    | 1.87E-10    |                    |
| siR_100014 | 1.5598                           | 0.9696                            | -0.68589945                                   | 0.053332237 |                    |
| siR_100039 | 1.9497                           | 1.1934                            | -0.70817447                                   | 0.025965659 |                    |
| siR_100068 | 4.5376                           | 1.1934                            | -1.92685176                                   | 5.92E-14    | **                 |
| siR_100075 | 4.6439                           | 1.4545                            | -1.67481361                                   | 5.23E-12    | **                 |
| siR_100096 | 3.6868                           | 1.4545                            | -1.34184586                                   | 1.85E-07    | **                 |
| siR_100098 | 1.9497                           | 0.5594                            | -1.80129999                                   | 2.93E-06    | **                 |
| siR_100104 | 6.6291                           | 1.268                             | -2.38625827                                   | 2.38E-25    | **                 |
| siR_100117 | 1.0635                           | 1.6409                            | 0.62566729                                    | 0.065882408 |                    |
| siR_100162 | 0.01                             | 1.3799                            | 7.10841991                                    | 2.74E-12    | **                 |
| siR_100165 | 1.028                            | 0.8205                            | -0.32526503                                   | 0.431150137 |                    |
| siR_100166 | 0.9926                           | 1.0815                            | 0.12374931                                    | 0.745159542 |                    |
| siR_100170 | 8.7207                           | 7.5707                            | -0.20401724                                   | 0.136058632 |                    |
| siR_100183 | 1.7725                           | 1.1188                            | -0.66383347                                   | 0.045088977 |                    |
| siR_100185 | 8.7207                           | 3.804                             | -1.1969267                                    | 1.89E-13    | **                 |
| siR_100211 | 5.6365                           | 5.4449                            | -0.04989404                                   | 0.764686414 |                    |
| siR_100241 | 1.1344                           | 0.8951                            | -0.34180866                                   | 0.385445259 |                    |
| siR_100258 | 0.01                             | 2.3495                            | 7.87620996                                    | 2.10E-20    | **                 |
| siR_100260 | 15.8107                          | 4.7363                            | -1.73906887                                   | 2.85E-39    | **                 |
| siR_100266 | 6.5937                           | 2.163                             | -1.60805458                                   | 1.30E-15    | **                 |
| siR_100313 | 0.01                             | 13.2393                           | 10.37061113                                   | 1.46E-111   | **                 |
| siR_100318 | 3.155                            | 0.8951                            | -1.81751923                                   | 1.88E-09    | **                 |
| siR_100329 | 205.7161                         | 195.2334                          | -0.07545482                                   | 0.006062093 |                    |
| siR_100352 | 1.3116                           | 0.2984                            | -2.13600837                                   | 1.97E-05    | **                 |
| siR_100358 | 0.01                             | 1.9766                            | 7.62687714                                    | 2.78E-17    | **                 |
| siR_100365 | 1.1344                           | 0.2984                            | -1.92661                                      | 0.000211792 | **                 |
| siR_100366 | 2.1624                           | 0.3356                            | -2.6878188                                    | 2.77E-10    | **                 |
| siR_100368 | 2.0561                           | 1.6409                            | -0.32542311                                   | 0.261432417 |                    |
| siR_100369 | 0.01                             | 1.6409                            | 7.35834351                                    | 1.79E-14    | **                 |
| siR_100371 | 0.01                             | 3.6548                            | 8.51364865                                    | 2.48E-31    | **                 |
| siR_100394 | 0.01                             | 1.4172                            | 7.14689956                                    | 1.34E-12    | **                 |
| siR_100441 | 1.8434                           | 0.8951                            | -1.04224838                                   | 0.002666955 | **                 |
| siR_100471 | 0.01                             | 2.2376                            | 7.80580835                                    | 1.81E-19    | **                 |

|            |          |         |             |               |    |
|------------|----------|---------|-------------|---------------|----|
| siR_100476 | 3.1196   | 1.1188  | -1.4794089  | 2.50E-07      | ** |
| siR_100483 | 1.3825   | 0.4102  | -1.75288008 | 0.0001191     | ** |
| siR_100484 | 0.01     | 2.8716  | 8.16571099  | 8.93E-25      | ** |
| siR_100514 | 1.3471   | 0.5594  | -1.26790479 | 0.002777337   | ** |
| siR_100533 | 60.5485  | 5.4822  | -3.46526435 | 440779106913e | ** |
| siR_100534 | 3.6159   | 0.2611  | -3.79168042 | 5.80E-22      | ** |
| siR_100546 | 1.6307   | 0.7086  | -1.20244802 | 0.001551793   | ** |
| siR_100555 | 4.9275   | 1.8274  | -1.43106341 | 2.34E-10      | ** |
| siR_100591 | 1.3116   | 0.2238  | -2.55104587 | 2.11E-06      | ** |
| siR_100605 | 33.0748  | 9.3235  | -1.82678889 | 8.01E-86      | ** |
| siR_100636 | 4.1476   | 1.0069  | -2.04235636 | 8.87E-14      | ** |
| siR_100645 | 1.028    | 0.8578  | -0.26112704 | 0.523138814   |    |
| siR_100655 | 1.3471   | 0.2611  | -2.36718259 | 4.10E-06      | ** |
| siR_100659 | 1.3471   | 0.5967  | -1.17477927 | 0.004838592   | ** |
| siR_100664 | 1.6661   | 0.2984  | -2.48115555 | 1.28E-07      | ** |
| siR_100667 | 6.2392   | 1.8274  | -1.7715686  | 8.29E-17      | ** |
| siR_100673 | 2.5524   | 0.7086  | -1.84881107 | 4.79E-08      | ** |
| siR_100684 | 0.709    | 1.0069  | 0.50606288  | 0.235363115   |    |
| siR_100695 | 0.01     | 1.6782  | 7.39077085  | 8.72E-15      | ** |
| siR_10073  | 0.01     | 3.5802  | 8.48389637  | 1.05E-30      | ** |
| siR_100739 | 3.9349   | 1.3426  | -1.55129742 | 1.91E-09      | ** |
| siR_100745 | 1.1344   | 0.1492  | -2.92661    | 2.25E-06      | ** |
| siR_100747 | 5.4238   | 1.6782  | -1.69238932 | 5.66E-14      | ** |
| siR_10075  | 0.01     | 1.3053  | 7.02823761  | 1.15E-11      | ** |
| siR_100753 | 4.0413   | 1.9393  | -1.05928345 | 5.92E-06      | ** |
| siR_100757 | 4.7148   | 1.3053  | -1.85281515 | 8.84E-14      | ** |
| siR_100759 | 1.2053   | 0.5221  | -1.20699422 | 0.006557539   | ** |
| siR_100768 | 1.3471   | 1.0815  | -0.31682329 | 0.37768126    |    |
| siR_10079  | 0.01     | 1.3426  | 7.06888574  | 5.63E-12      | ** |
| siR_1008   | 0.01     | 8.503   | 9.73182813  | 6.48E-72      | ** |
| siR_100802 | 4.0413   | 3.9904  | -0.01828608 | 0.927044666   |    |
| siR_100804 | 4.963    | 3.7667  | -0.39791132 | 0.034190514   |    |
| siR_100806 | 2.1624   | 1.0069  | -1.10271301 | 0.00064935    | ** |
| siR_10081  | 53.4231  | 35.28   | -0.59861313 | 4.29E-24      |    |
| siR_100813 | 1.0989   | 0.634   | -0.79350536 | 0.066742311   |    |
| siR_100814 | 0.01     | 7.1977  | 9.49139216  | 5.47E-61      | ** |
| siR_10082  | 5.0693   | 3.2819  | -0.62725526 | 0.001185577   |    |
| siR_100833 | 0.01     | 1.0442  | 6.70625425  | 1.77E-09      | ** |
| siR_100857 | 1.2762   | 0.2984  | -2.096535   | 3.20E-05      | ** |
| siR_100860 | 5.2466   | 1.8647  | -1.49243926 | 1.50E-11      | ** |
| siR_100864 | 1.9143   | 0.5967  | -1.68173926 | 1.01E-05      | ** |
| siR_100868 | 23.8224  | 10.5542 | -1.17450154 | 3.87E-33      | ** |
| siR_100871 | 463.3309 | 94.9502 | -2.28679996 | 0             | ** |
| siR_100872 | 62.002   | 27.5229 | -1.17168226 | 3.67E-83      | ** |
| siR_100873 | 5.1402   | 2.7225  | -0.91689245 | 5.70E-06      |    |
| siR_100874 | 2.446    | 0.7459  | -1.71337027 | 4.00E-07      | ** |
| siR_100875 | 1.1698   | 0.2238  | -2.38597995 | 1.70E-05      | ** |

|            |          |         |             |             |    |
|------------|----------|---------|-------------|-------------|----|
| siR_100879 | 18.9657  | 3.2073  | -2.56396141 | 1.63E-75    | ** |
| siR_100883 | 6.0974   | 3.431   | -0.82956507 | 5.58E-06    |    |
| siR_10089  | 3.3323   | 1.0815  | -1.62348462 | 1.15E-08    | ** |
| siR_10090  | 3.0132   | 0.7086  | -2.08825306 | 1.23E-10    | ** |
| siR_100903 | 1.028    | 0.2611  | -1.9771659  | 0.000342937 | ** |
| siR_100909 | 1.1698   | 0.2984  | -1.97094245 | 0.000133017 | ** |
| siR_100945 | 1.6307   | 0.2984  | -2.45017195 | 2.15E-07    | ** |
| siR_10096  | 1.0989   | 0.2611  | -2.07338574 | 0.000132441 | ** |
| siR_100966 | 1.8788   | 0.2238  | -3.06952956 | 3.24E-10    | ** |
| siR_100971 | 8.0471   | 2.8716  | -1.48661416 | 7.20E-17    | ** |
| siR_100996 | 1.5598   | 0.634   | -1.29880631 | 0.001018403 | ** |
| siR_101    | 1.2407   | 0.2238  | -2.47087237 | 6.03E-06    | ** |
| siR_1010   | 2.9423   | 2.4987  | -0.23576665 | 0.321748673 |    |
| siR_10102  | 0.01     | 3.5802  | 8.48389637  | 1.05E-30    | ** |
| siR_10104  | 155.5544 | 93.4957 | -0.73444728 | 3.16E-95    |    |
| siR_101046 | 0.01     | 1.268   | 6.98641094  | 2.37E-11    | ** |
| siR_10105  | 5.1048   | 2.797   | -0.86797419 | 1.58E-05    |    |
| siR_101051 | 2.4815   | 0.8578  | -1.53249923 | 2.43E-06    | ** |
| siR_101052 | 5.6011   | 1.1934  | -2.2306325  | 4.52E-20    | ** |
| siR_10106  | 4.0413   | 1.8647  | -1.11587591 | 2.31E-06    | ** |
| siR_101066 | 17.1223  | 2.797   | -2.61392435 | 8.51E-70    | ** |
| siR_10107  | 3.0132   | 1.7155  | -0.81266731 | 0.001758048 |    |
| siR_101075 | 2.2333   | 0.7832  | -1.51172439 | 9.71E-06    | ** |
| siR_10108  | 2.7296   | 1.3426  | -1.02366    | 0.000303307 | ** |
| siR_101086 | 0.01     | 1.6782  | 7.39077085  | 8.72E-15    | ** |
| siR_101105 | 4.3958   | 1.7901  | -1.29608557 | 2.90E-08    | ** |
| siR_101147 | 0.01     | 69.8141 | 12.76930272 | 0           | ** |
| siR_101148 | 0.01     | 16.5212 | 10.69010276 | 4.93E-139   | ** |
| siR_101149 | 0.01     | 2.8343  | 8.14684866  | 1.83E-24    | ** |
| siR_101158 | 0.01     | 15.3651 | 10.58544144 | 2.35E-129   | ** |
| siR_101159 | 0.01     | 4.1396  | 8.69334756  | 2.17E-35    | ** |
| siR_101160 | 0.01     | 2.7597  | 8.10836763  | 7.72E-24    | ** |
| siR_101168 | 0.01     | 2.6106  | 8.02823761  | 1.37E-22    | ** |
| siR_101173 | 0.01     | 9.137   | 9.83557675  | 3.20E-77    | ** |
| siR_101174 | 0.01     | 9.137   | 9.83557675  | 3.20E-77    | ** |
| siR_101175 | 0.01     | 1.6409  | 7.35834351  | 1.79E-14    | ** |
| siR_101176 | 0.01     | 1.529   | 7.2564446   | 1.55E-13    | ** |
| siR_101181 | 0.01     | 2.536   | 7.98641094  | 5.76E-22    | ** |
| siR_101215 | 0.01     | 8.0928  | 9.66049513  | 1.76E-68    | ** |
| siR_101219 | 0.01     | 39.9417 | 11.96368002 | 0           | ** |
| siR_101234 | 31.905   | 19.6912 | -0.6962315  | 3.73E-19    |    |
| siR_101237 | 28.9272  | 21.705  | -0.41439926 | 1.01E-07    |    |
| siR_101239 | 0.01     | 6.4145  | 9.325193    | 1.97E-54    | ** |
| siR_101248 | 3.0132   | 0.5967  | -2.33621875 | 5.27E-12    | ** |
| siR_101270 | 0.01     | 6.7129  | 9.39079234  | 6.26E-57    | ** |
| siR_101278 | 10.0678  | 2.163   | -2.21864289 | 1.14E-34    | ** |
| siR_101289 | 4.6794   | 1.0442  | -2.16392549 | 1.99E-16    | ** |

|            |          |          |              |              |    |
|------------|----------|----------|--------------|--------------|----|
| siR_10129  | 1. 2407  | 0. 8205  | -0. 59657908 | 0. 128834839 |    |
| siR_101311 | 0. 01    | 9. 6591  | 9. 91574496  | 1. 36E-81    | ** |
| siR_101319 | 1. 418   | 0. 4848  | -1. 54839593 | 0. 00035749  | ** |
| siR_101340 | 2. 5169  | 0. 6713  | -1. 90661835 | 3. 13E-08    | ** |
| siR_101351 | 1. 0989  | 0. 2611  | -2. 07338574 | 0. 000132441 | ** |
| siR_101357 | 1. 6661  | 0. 7086  | -1. 23343162 | 0. 001096727 | ** |
| siR_101373 | 5. 3529  | 0. 6713  | -2. 99529115 | 3. 73E-26    | ** |
| siR_101388 | 2. 5878  | 0. 634   | -2. 02917138 | 4. 99E-09    | ** |
| siR_101399 | 0. 01    | 1. 4545  | 7. 18437949  | 6. 51E-13    | ** |
| siR_10142  | 24. 9213 | 14. 6192 | -0. 76951496 | 6. 41E-18    |    |
| siR_101475 | 16. 4133 | 9. 6591  | -0. 76490466 | 3. 38E-12    |    |
| siR_101490 | 0. 01    | 3. 3564  | 8. 39077085  | 7. 81E-29    | ** |
| siR_101493 | 0. 01    | 3. 6175  | 8. 49884921  | 5. 10E-31    | ** |
| siR_101503 | 0. 01    | 1. 3053  | 7. 02823761  | 1. 15E-11    | ** |
| siR_101514 | 9. 8551  | 2. 9835  | -1. 72386473 | 8. 67E-25    | ** |
| siR_101540 | 3. 2614  | 0. 8205  | -1. 99091615 | 8. 33E-11    | ** |
| siR_101564 | 8. 1535  | 0. 634   | -3. 68486474 | 8. 18E-47    | ** |
| siR_10157  | 4. 0058  | 1. 8647  | -1. 10314685 | 3. 16E-06    | ** |
| siR_101595 | 1. 028   | 0. 5221  | -0. 9774422  | 0. 034659916 |    |
| siR_101611 | 0. 01    | 1. 2307  | 6. 94333532  | 4. 86E-11    | ** |
| siR_101612 | 0. 01    | 2. 9462  | 8. 20271156  | 2. 12E-25    | ** |
| siR_101628 | 2. 0206  | 0. 7086  | -1. 51174038 | 2. 62E-05    | ** |
| siR_101701 | 1. 8079  | 1. 8647  | 0. 04462866  | 0. 874668717 |    |
| siR_101714 | 1. 1344  | 0. 1492  | -2. 92661    | 2. 25E-06    | ** |
| siR_10173  | 18. 7885 | 11. 1509 | -0. 75268974 | 2. 05E-13    |    |
| siR_101750 | 1. 0635  | 0. 8951  | -0. 24869926 | 0. 535296857 |    |
| siR_10176  | 69. 9428 | 24. 2783 | -1. 52650815 | 1. 98E-139   | ** |
| siR_101766 | 2. 5878  | 0. 8951  | -1. 53160535 | 1. 49E-06    | ** |
| siR_101804 | 3. 4741  | 2. 0139  | -0. 78664723 | 0. 001080173 |    |
| siR_101805 | 0. 01    | 2. 536   | 7. 98641094  | 5. 76E-22    | ** |
| siR_10182  | 33. 9965 | 32. 3338 | -0. 07234316 | 0. 284936323 |    |
| siR_101842 | 1. 2407  | 0. 1865  | -2. 73390678 | 1. 71E-06    | ** |
| siR_101849 | 37. 6833 | 12. 0832 | -1. 64092274 | 3. 55E-84    | ** |
| siR_101850 | 3. 155   | 1. 902   | -0. 73012276 | 0. 003516301 |    |
| siR_101851 | 1. 6307  | 0. 6713  | -1. 28046185 | 0. 000886812 | ** |
| siR_101855 | 3. 1905  | 1. 268   | -1. 33122779 | 1. 46E-06    | ** |
| siR_101856 | 1. 1344  | 0. 6713  | -0. 75689989 | 0. 073613489 |    |
| siR_101857 | 1. 6307  | 0. 5221  | -1. 64309333 | 6. 28E-05    | ** |
| siR_101868 | 1. 5598  | 0. 4475  | -1. 80140147 | 3. 03E-05    | ** |
| siR_101893 | 7. 5154  | 1. 9393  | -1. 95431389 | 1. 46E-22    | ** |
| siR_101894 | 3. 8286  | 0. 8205  | -2. 2222417  | 4. 21E-14    | ** |
| siR_101899 | 1. 3116  | 0. 3356  | -1. 96651319 | 5. 19E-05    | ** |
| siR_101905 | 1. 1698  | 0. 1119  | -3. 38597995 | 2. 69E-07    | ** |
| siR_10193  | 6. 381   | 2. 2376  | -1. 51183038 | 5. 55E-14    | ** |
| siR_101933 | 1. 3116  | 0. 634   | -1. 04877306 | 0. 011177638 | *  |
| siR_101947 | 3. 5804  | 2. 5733  | -0. 47650111 | 0. 033819216 |    |
| siR_101952 | 4. 6085  | 0. 5967  | -2. 94921957 | 2. 20E-22    | ** |

|            |          |         |             |               |    |
|------------|----------|---------|-------------|---------------|----|
| siR_101956 | 0.01     | 1.4545  | 7.18437949  | 6.51E-13      | ** |
| siR_101968 | 0.01     | 1.2307  | 6.94333532  | 4.86E-11      | ** |
| siR_101972 | 0.01     | 27.1126 | 11.40474775 | 1.08E-227     | ** |
| siR_101976 | 0.01     | 1.1188  | 6.80580835  | 4.20E-10      | ** |
| siR_101981 | 0.01     | 1.7901  | 7.48389637  | 1.01E-15      | ** |
| siR_101994 | 0.01     | 2.2376  | 7.80580835  | 1.81E-19      | ** |
| siR_102000 | 1.8434   | 1.0442  | -0.81997109 | 0.014012732   |    |
| siR_102020 | 3.155    | 0.4102  | -2.94324061 | 1.03E-15      | ** |
| siR_102030 | 3.1905   | 1.0069  | -1.66386212 | 1.34E-08      | ** |
| siR_102031 | 10.7059  | 2.4987  | -2.09915648 | 2.10E-34      | ** |
| siR_102053 | 0.01     | 12.3443 | 10.26962931 | 4.54E-104     | ** |
| siR_102057 | 0.01     | 4.8482  | 8.9213054   | 2.54E-41      | ** |
| siR_102060 | 0.01     | 1.5663  | 7.29121675  | 7.54E-14      | ** |
| siR_102069 | 1.3825   | 0.2238  | -2.62699754 | 7.30E-07      | ** |
| siR_102078 | 35.769   | 12.307  | -1.53923066 | 4.49E-73      | ** |
| siR_102080 | 0.01     | 1.8274  | 7.51364865  | 4.92E-16      | ** |
| siR_102097 | 1.1344   | 0.2611  | -2.11925507 | 8.17E-05      | ** |
| siR_102101 | 1.5243   | 0.3729  | -2.03128617 | 7.99E-06      | ** |
| siR_102113 | 3.2614   | 1.4918  | -1.12843726 | 1.89E-05      | ** |
| siR_102133 | 1.8434   | 2.536   | 0.46018559  | 0.082779603   |    |
| siR_102136 | 1.6307   | 2.9462  | 0.85336398  | 0.001200533   |    |
| siR_102147 | 1.3825   | 0.7459  | -0.89022535 | 0.022894115   |    |
| siR_102159 | 0.01     | 1.0815  | 6.75688986  | 8.62E-10      | ** |
| siR_102184 | 1.0989   | 0.1865  | -2.55881257 | 1.47E-05      | ** |
| siR_102192 | 0.9571   | 1.3053  | 0.44763985  | 0.226390695   |    |
| siR_102195 | 0.4608   | 2.163   | 2.23082104  | 1.14E-08      | ** |
| siR_102216 | 1.3825   | 0.2611  | -2.40460512 | 2.46E-06      | ** |
| siR_102219 | 3.1905   | 0.8951  | -1.83366176 | 1.21E-09      | ** |
| siR_102221 | 7.9762   | 3.9904  | -0.99916821 | 1.22E-09      |    |
| siR_102224 | 107.5552 | 26.0684 | -2.04470333 | 898108834353e | ** |
| siR_102228 | 4.7503   | 1.7528  | -1.43835724 | 4.24E-10      | ** |
| siR_102233 | 2.3397   | 1.0815  | -1.11328989 | 0.00034804    | ** |
| siR_102236 | 0.01     | 1.0815  | 6.75688986  | 8.62E-10      | ** |
| siR_102262 | 4.5021   | 1.9766  | -1.18757716 | 1.58E-07      | ** |
| siR_102264 | 1.2053   | 0.7459  | -0.69233815 | 0.087734995   |    |
| siR_102273 | 0.01     | 1.0442  | 6.70625425  | 1.77E-09      | ** |
| siR_102274 | 0.01     | 2.9462  | 8.20271156  | 2.12E-25      | ** |
| siR_102292 | 38.3923  | 69.926  | 0.86501199  | 9.25E-58      |    |
| siR_10233  | 1.2407   | 1.4918  | 0.26589982  | 0.42673041    |    |
| siR_102353 | 1.1344   | 0.5221  | -1.11953137 | 0.013060942   | *  |
| siR_102355 | 1.3116   | 0.8205  | -0.67675257 | 0.080471863   |    |
| siR_102356 | 2.5169   | 1.3799  | -0.86708418 | 0.00254044    |    |
| siR_10236  | 1.1698   | 0.2984  | -1.97094245 | 0.000133017   | ** |
| siR_102365 | 1.1698   | 0.0746  | -3.97094245 | 4.33E-08      | ** |
| siR_102376 | 5.0693   | 1.3426  | -1.916757   | 2.50E-15      | ** |
| siR_102393 | 0.01     | 1.2307  | 6.94333532  | 4.86E-11      | ** |
| siR_10241  | 0.01     | 1.0069  | 6.6537766   | 3.63E-09      | ** |

|            |           |           |             |             |    |
|------------|-----------|-----------|-------------|-------------|----|
| siR_102420 | 0.01      | 3.7294    | 8.54279973  | 5.90E-32    | ** |
| siR_102434 | 1.737     | 1.4918    | -0.21954362 | 0.47916079  |    |
| siR_102436 | 3.545     | 1.9393    | -0.87024963 | 0.000318042 |    |
| siR_102444 | 6.3101    | 3.17      | -0.99318003 | 7.60E-08    |    |
| siR_102449 | 1.418     | 0.6713    | -1.07882799 | 0.006897488 | ** |
| siR_102453 | 4.1122    | 1.9393    | -1.08437443 | 3.21E-06    | ** |
| siR_102466 | 16.1652   | 4.438     | -1.86490978 | 5.39E-44    | ** |
| siR_102471 | 5.1402    | 3.0208    | -0.76689382 | 9.79E-05    |    |
| siR_102473 | 54.4866   | 23.2714   | -1.22734346 | 9.52E-79    | ** |
| siR_102481 | 1.7016    | 1.0069    | -0.75697153 | 0.027686419 |    |
| siR_102493 | 0.01      | 2.7597    | 8.10836763  | 7.72E-24    | ** |
| siR_102506 | 18.1504   | 13.0529   | -0.47563097 | 1.69E-06    |    |
| siR_102519 | 0.01      | 4.9974    | 8.96503389  | 1.43E-42    | ** |
| siR_102525 | 78.2026   | 125.7176  | 0.68489816  | 6.68E-69    |    |
| siR_102526 | 0.7444    | 1.529     | 1.03843845  | 0.006168904 | ** |
| siR_102533 | 6187.0451 | 3106.6909 | -0.99387184 | 0           |    |
| siR_102534 | 26.0203   | 75.3709   | 1.53437002  | 1.64E-152   | ** |
| siR_102535 | 19.0012   | 44.5662   | 1.22985942  | 2.14E-65    | ** |
| siR_102536 | 1.3471    | 0.8205    | -0.71528171 | 0.062862752 |    |
| siR_102542 | 129.605   | 77.0491   | -0.75027137 | 1.35E-82    |    |
| siR_102543 | 10.6704   | 7.0858    | -0.59061161 | 8.00E-06    |    |
| siR_102544 | 8.1535    | 4.6617    | -0.80656332 | 2.89E-07    |    |
| siR_102559 | 0.01      | 2.536     | 7.98641094  | 5.76E-22    | ** |
| siR_102562 | 69.5528   | 82.9416   | 0.25398728  | 1.27E-08    |    |
| siR_102563 | 0.709     | 1.0815    | 0.60917613  | 0.145996817 |    |
| siR_102567 | 1.2407    | 0.3729    | -1.73429361 | 0.000303178 | ** |
| siR_102568 | 3948.5223 | 1810.0205 | -1.1253068  | 0           | ** |
| siR_102569 | 17.6895   | 55.083    | 1.63871387  | 4.63E-123   | ** |
| siR_102570 | 9.7133    | 26.6278   | 1.45489981  | 5.17E-51    | ** |
| siR_102571 | 1.0635    | 0.4475    | -1.24886045 | 0.008857046 | ** |
| siR_102576 | 80.1169   | 39.7553   | -1.01095939 | 1.39E-84    | ** |
| siR_102577 | 5.8847    | 3.2073    | -0.87560956 | 2.99E-06    |    |
| siR_102578 | 4.6085    | 2.2376    | -1.04234509 | 1.79E-06    | ** |
| siR_102587 | 0.01      | 1.1934    | 6.89893387  | 9.98E-11    | ** |
| siR_102592 | 0.01      | 1.1561    | 6.85312238  | 2.05E-10    | ** |
| siR_10260  | 5.1402    | 1.8647    | -1.46288095 | 4.68E-11    | ** |
| siR_102690 | 0.01      | 1.4172    | 7.14689956  | 1.34E-12    | ** |
| siR_102746 | 0.01      | 3.5056    | 8.45351758  | 4.40E-30    | ** |
| siR_102751 | 0.01      | 1.1561    | 6.85312238  | 2.05E-10    | ** |
| siR_102774 | 0.01      | 1.5663    | 7.29121675  | 7.54E-14    | ** |
| siR_102781 | 53.1749   | 23.0849   | -1.20379593 | 1.22E-74    | ** |
| siR_102789 | 34.741    | 14.6938   | -1.24143174 | 9.62E-52    | ** |
| siR_102795 | 0.01      | 2.4987    | 7.96503389  | 1.18E-21    | ** |
| siR_102797 | 9.1106    | 8.5403    | -0.09325932 | 0.478078749 |    |
| siR_102807 | 0.01      | 13.8733   | 10.43809528 | 7.21E-117   | ** |
| siR_102808 | 0.01      | 1.4918    | 7.22091032  | 3.17E-13    | ** |
| siR_102815 | 0.01      | 84.5825   | 13.04614349 | 0           | ** |

|            |          |         |             |             |    |
|------------|----------|---------|-------------|-------------|----|
| siR_102816 | 0.01     | 1.6409  | 7.35834351  | 1.79E-14    | ** |
| siR_102817 | 0.01     | 1.2307  | 6.94333532  | 4.86E-11    | ** |
| siR_102824 | 0.01     | 52.0249 | 12.34498657 | 0           | ** |
| siR_102825 | 0.01     | 2.0512  | 7.68032436  | 6.59E-18    | ** |
| siR_102826 | 0.01     | 1.1561  | 6.85312238  | 2.05E-10    | ** |
| siR_102837 | 0.01     | 7.0858  | 9.46878694  | 4.73E-60    | ** |
| siR_102838 | 0.01     | 2.3122  | 7.85312238  | 4.30E-20    | ** |
| siR_102839 | 0.01     | 2.0885  | 7.70632333  | 3.21E-18    | ** |
| siR_102840 | 0.01     | 1.0442  | 6.70625425  | 1.77E-09    | ** |
| siR_102846 | 0.01     | 10.1066 | 9.98108202  | 2.44E-85    | ** |
| siR_102847 | 0.01     | 2.4241  | 7.9213054   | 4.98E-21    | ** |
| siR_102848 | 0.01     | 1.3426  | 7.06888574  | 5.63E-12    | ** |
| siR_102849 | 0.01     | 1.2307  | 6.94333532  | 4.86E-11    | ** |
| siR_102854 | 0.01     | 1.6036  | 7.32517051  | 3.67E-14    | ** |
| siR_102860 | 1.4534   | 0.7459  | -0.96237768 | 0.012720128 |    |
| siR_10287  | 1.1698   | 0.8951  | -0.38614112 | 0.322692255 |    |
| siR_102887 | 2.3751   | 0.0746  | -4.99266882 | 2.20E-17    | ** |
| siR_10289  | 1.1344   | 0.634   | -0.83937469 | 0.050540314 |    |
| siR_102909 | 1.2762   | 0.7459  | -0.77480031 | 0.052442918 |    |
| siR_102920 | 1.8788   | 0.8951  | -1.06969073 | 0.001948509 | ** |
| siR_102925 | 0.01     | 2.0512  | 7.68032436  | 6.59E-18    | ** |
| siR_102929 | 0.01     | 2.9462  | 8.20271156  | 2.12E-25    | ** |
| siR_10295  | 1.2053   | 0.634   | -0.92683753 | 0.028276658 |    |
| siR_102962 | 0.01     | 1.6036  | 7.32517051  | 3.67E-14    | ** |
| siR_102965 | 0.01     | 6.5637  | 9.35836549  | 1.11E-55    | ** |
| siR_10297  | 1.028    | 0.8951  | -0.19971949 | 0.622135026 |    |
| siR_103056 | 1.0635   | 0.2984  | -1.83350059 | 0.000528454 | ** |
| siR_103079 | 2.0915   | 0.8578  | -1.28582478 | 0.000152961 | ** |
| siR_103087 | 4.6085   | 1.1934  | -1.94921957 | 2.40E-14    | ** |
| siR_103088 | 3.1196   | 0.8951  | -1.80124028 | 2.90E-09    | ** |
| siR_103092 | 1.0989   | 0.1119  | -3.29577817 | 8.66E-07    | ** |
| siR_103116 | 1.8079   | 0.9696  | -0.89885328 | 0.008533461 |    |
| siR_103132 | 4.0058   | 1.2307  | -1.70261126 | 9.27E-11    | ** |
| siR_103133 | 1.3825   | 0.2611  | -2.40460512 | 2.46E-06    | ** |
| siR_103140 | 53.1749  | 32.1473 | -0.72604784 | 4.42E-33    |    |
| siR_103144 | 18.3276  | 5.4076  | -1.76095753 | 5.00E-46    | ** |
| siR_103148 | 117.3039 | 78.429  | -0.58079187 | 2.65E-48    |    |
| siR_103149 | 2.3397   | 1.6409  | -0.51183624 | 0.067734636 |    |
| siR_103210 | 1.4534   | 0.3729  | -1.96257111 | 2.04E-05    | ** |
| siR_103213 | 7.8699   | 3.0208  | -1.38141463 | 5.78E-15    | ** |
| siR_103218 | 16.0234  | 5.1093  | -1.64898275 | 5.06E-37    | ** |
| siR_103231 | 21.1636  | 5.0347  | -2.07160733 | 2.50E-65    | ** |
| siR_103232 | 3.6513   | 1.1561  | -1.65914402 | 1.28E-09    | ** |
| siR_103233 | 2.0206   | 0.4475  | -2.17482417 | 7.15E-08    | ** |
| siR_103234 | 1.4534   | 0.3729  | -1.96257111 | 2.04E-05    | ** |
| siR_103237 | 1.9497   | 0.1865  | -3.38600462 | 2.03E-11    | ** |
| siR_103244 | 1.2762   | 0.1865  | -2.7746069  | 9.92E-07    | ** |

|            |          |          |             |             |    |
|------------|----------|----------|-------------|-------------|----|
| siR_10325  | 0.01     | 10.8898  | 10.08876174 | 6.79E-92    | ** |
| siR_103264 | 6.7709   | 2.0139   | -1.74935556 | 7.89E-18    | ** |
| siR_103265 | 2.0206   | 0.634    | -1.67222901 | 6.14E-06    | ** |
| siR_103280 | 205.9997 | 122.6968 | -0.74754461 | 2.43E-129   |    |
| siR_103289 | 22.298   | 17.006   | -0.39087047 | 9.56E-06    |    |
| siR_10329  | 0.01     | 5.7433   | 9.16573611  | 8.19E-49    | ** |
| siR_103293 | 13.081   | 11.934   | -0.13239515 | 0.23008062  |    |
| siR_103327 | 1.028    | 0.4102   | -1.32544087 | 0.007079856 | ** |
| siR_103336 | 0.01     | 2.9089   | 8.18432989  | 4.35E-25    | ** |
| siR_103337 | 4.8566   | 3.3937   | -0.51708763 | 0.007666522 |    |
| siR_10334  | 0.01     | 1.1934   | 6.89893387  | 9.98E-11    | ** |
| siR_103343 | 1.2407   | 0.1865   | -2.73390678 | 1.71E-06    | ** |
| siR_103346 | 29.8134  | 10.8525  | -1.45793349 | 1.28E-56    | ** |
| siR_103349 | 4.8212   | 1.0442   | -2.20699421 | 2.89E-17    | ** |
| siR_103353 | 5.3884   | 1.268    | -2.08730221 | 6.17E-18    | ** |
| siR_103356 | 1.2762   | 0.4102   | -1.63745504 | 0.000431216 | ** |
| siR_103358 | 1.8788   | 0.2611   | -2.84713714 | 1.41E-09    | ** |
| siR_103364 | 4.4312   | 1.0442   | -2.08529938 | 5.54E-15    | ** |
| siR_103365 | 2.7296   | 1.0069   | -1.43876914 | 2.35E-06    | ** |
| siR_103366 | 2.3751   | 0.9323   | -1.34912209 | 2.78E-05    | ** |
| siR_103376 | 0.01     | 3.2819   | 8.35838747  | 3.29E-28    | ** |
| siR_103377 | 0.01     | 1.7528   | 7.45351758  | 2.07E-15    | ** |
| siR_103378 | 0.01     | 1.1561   | 6.85312238  | 2.05E-10    | ** |
| siR_103385 | 5.3175   | 1.529    | -1.79815972 | 8.33E-15    | ** |
| siR_103386 | 1.418    | 0.5594   | -1.34190537 | 0.001335576 | ** |
| siR_10339  | 4.6794   | 2.536    | -0.88376881 | 2.72E-05    |    |
| siR_103398 | 6.7355   | 2.6479   | -1.34693641 | 1.41E-12    | ** |
| siR_103399 | 1.028    | 0.4475   | -1.19988068 | 0.012673013 | *  |
| siR_103404 | 8.5789   | 4.438    | -0.95088301 | 1.44E-09    |    |
| siR_103405 | 3.6159   | 2.2749   | -0.66855165 | 0.003807491 |    |
| siR_103406 | 4.6439   | 1.5663   | -1.56797634 | 4.70E-11    | ** |
| siR_103407 | 3.2614   | 1.4172   | -1.20244802 | 6.80E-06    | ** |
| siR_103408 | 1.0989   | 0.8205   | -0.42148487 | 0.29881012  |    |
| siR_103418 | 4.5376   | 2.1258   | -1.09392357 | 8.28E-07    | ** |
| siR_103426 | 0.01     | 5.6314   | 9.13734982  | 7.07E-48    | ** |
| siR_103456 | 1.4889   | 0.4102   | -1.85984746 | 3.15E-05    | ** |
| siR_103464 | 3.8286   | 1.8647   | -1.0378734  | 1.46E-05    | ** |
| siR_103465 | 1.4534   | 0.7832   | -0.89197914 | 0.019383579 |    |
| siR_103469 | 275.1271 | 147.2362 | -0.90196583 | 1.43E-236   |    |
| siR_103470 | 4.3603   | 2.2376   | -0.96247524 | 1.37E-05    |    |
| siR_103480 | 315.7527 | 106.8842 | -1.56274647 | 0           | ** |
| siR_103481 | 3.545    | 2.8716   | -0.30393082 | 0.165329337 |    |
| siR_103482 | 6.8773   | 2.7225   | -1.33691023 | 1.10E-12    | ** |
| siR_103483 | 1.3471   | 0.634    | -1.08730221 | 0.008088456 | ** |
| siR_103502 | 10.1741  | 2.2749   | -2.16102615 | 6.11E-34    | ** |
| siR_103503 | 2.0206   | 1.0069   | -1.00486334 | 0.002256209 | ** |
| siR_103504 | 4.0413   | 0.9696   | -2.05935785 | 1.37E-13    | ** |



|            |         |         |             |             |    |
|------------|---------|---------|-------------|-------------|----|
| siR_103516 | 2.0915  | 0.7832  | -1.41708533 | 4.55E-05    | ** |
| siR_103529 | 3.0487  | 1.2307  | -1.30871506 | 3.38E-06    | ** |
| siR_10358  | 14.4636 | 4.5871  | -1.65677242 | 8.63E-34    | ** |
| siR_103595 | 1.3471  | 0.7086  | -0.92681358 | 0.020219118 |    |
| siR_10360  | 1.6307  | 0.5221  | -1.64309333 | 6.28E-05    | ** |
| siR_103624 | 4.963   | 0.8205  | -2.59663722 | 3.72E-21    | ** |
| siR_103629 | 0.01    | 1.1561  | 6.85312238  | 2.05E-10    | ** |
| siR_103658 | 0.01    | 4.2515  | 8.73182813  | 2.51E-36    | ** |
| siR_103659 | 3.2259  | 2.6106  | -0.30532029 | 0.18393241  |    |
| siR_103663 | 0.01    | 1.1561  | 6.85312238  | 2.05E-10    | ** |
| siR_103676 | 12.3366 | 13.3885 | 0.1180495   | 0.276512578 |    |
| siR_103679 | 4.1476  | 3.3937  | -0.28941773 | 0.151661914 |    |
| siR_103681 | 1.7725  | 0.7832  | -1.17833296 | 0.001154208 | ** |
| siR_103710 | 5.5656  | 3.2073  | -0.79517792 | 2.87E-05    |    |
| siR_103735 | 2.6233  | 1.7528  | -0.58172141 | 0.02973508  |    |
| siR_103756 | 0.01    | 3.3192  | 8.37469175  | 1.60E-28    | ** |
| siR_10377  | 7.9408  | 4.5871  | -0.791702   | 6.28E-07    |    |
| siR_103801 | 4.2185  | 0.5221  | -3.01433204 | 5.02E-21    | ** |
| siR_103826 | 0.01    | 8.503   | 9.73182813  | 6.48E-72    | ** |
| siR_103837 | 3.155   | 2.9835  | -0.08063423 | 0.719471558 |    |
| siR_103840 | 2.1979  | 1.1561  | -0.92685956 | 0.002876534 |    |
| siR_103859 | 0.01    | 2.9462  | 8.20271156  | 2.12E-25    | ** |
| siR_103860 | 0.01    | 1.3799  | 7.10841991  | 2.74E-12    | ** |
| siR_103862 | 0.01    | 46.0206 | 12.16806408 | 0           | ** |
| siR_103863 | 0.01    | 1.0815  | 6.75688986  | 8.62E-10    | ** |
| siR_103900 | 42.5754 | 6.3027  | -2.75597819 | 4.75E-181   | ** |
| siR_103925 | 1.1344  | 0.1865  | -2.6046819  | 8.62E-06    | ** |
| siR_103927 | 3.4386  | 0.5221  | -2.71942324 | 8.80E-16    | ** |
| siR_103928 | 44.3833 | 6.4518  | -2.78224332 | 1.45E-190   | ** |
| siR_103930 | 2.1979  | 0.8951  | -1.29600497 | 9.36E-05    | ** |
| siR_103959 | 0.01    | 1.1934  | 6.89893387  | 9.98E-11    | ** |
| siR_103977 | 5.6365  | 2.7225  | -1.04986755 | 1.06E-07    | ** |
| siR_103983 | 0.01    | 1.4545  | 7.18437949  | 6.51E-13    | ** |
| siR_103995 | 3.7577  | 2.0139  | -0.89985784 | 0.000136776 |    |
| siR_104011 | 3.2968  | 1.4172  | -1.218023   | 4.86E-06    | ** |
| siR_104040 | 2.1979  | 1.4545  | -0.59560245 | 0.0423763   |    |
| siR_104044 | 6.8418  | 2.3868  | -1.51929825 | 5.50E-15    | ** |
| siR_104045 | 1.1344  | 0.4102  | -1.46753004 | 0.002218064 | ** |
| siR_104059 | 0.01    | 2.4241  | 7.9213054   | 4.98E-21    | ** |
| siR_104077 | 0.01    | 1.268   | 6.98641094  | 2.37E-11    | ** |
| siR_104084 | 1.3471  | 0.1492  | -3.17453751 | 7.49E-08    | ** |
| siR_104102 | 1.2762  | 0.3729  | -1.77499374 | 0.000195629 | ** |
| siR_104108 | 1.028   | 0.5221  | -0.9774422  | 0.034659916 |    |
| siR_10412  | 1.3116  | 0.7832  | -0.74387514 | 0.057586901 |    |
| siR_104168 | 2.0206  | 0.5967  | -1.75970607 | 2.79E-06    | ** |
| siR_104184 | 5.282   | 6.8994  | 0.3853866   | 0.015002367 |    |
| siR_104188 | 1.5598  | 1.1561  | -0.43209486 | 0.203345857 |    |

|            |         |         |             |               |    |
|------------|---------|---------|-------------|---------------|----|
| siR_104201 | 32.2595 | 7.1977  | -2.1641162  | 3.38E-104     | ** |
| siR_104204 | 5.3175  | 2.0512  | -1.37427996 | 1.70E-10      | ** |
| siR_104207 | 2.0915  | 1.529   | -0.45194959 | 0.123631305   |    |
| siR_104214 | 8.2953  | 0.7832  | -3.40484149 | 1.26E-44      | ** |
| siR_104216 | 9.0043  | 1.3053  | -2.7862327  | 4.92E-40      | ** |
| siR_104217 | 9.8551  | 0.9696  | -3.34540891 | 6.09E-52      | ** |
| siR_104221 | 4.6439  | 0.7832  | -2.56788424 | 1.17E-19      | ** |
| siR_104224 | 1.2053  | 0.3729  | -1.69253158 | 0.000467353   | ** |
| siR_104253 | 1.028   | 0.1865  | -2.46259273 | 4.21E-05      | ** |
| siR_104261 | 1.6307  | 0.8205  | -0.99091616 | 0.006788426   |    |
| siR_104295 | 1.3825  | 0.1492  | -3.21196004 | 4.21E-08      | ** |
| siR_104296 | 2.8714  | 2.9089  | 0.01871938  | 0.932970802   |    |
| siR_104301 | 0.01    | 2.9462  | 8.20271156  | 2.12E-25      | ** |
| siR_104340 | 0.01    | 1.1934  | 6.89893387  | 9.98E-11      | ** |
| siR_104350 | 0.01    | 1.8274  | 7.51364865  | 4.92E-16      | ** |
| siR_104354 | 33.6066 | 8.2047  | -2.0342221  | 2.36E-100     | ** |
| siR_104369 | 0.01    | 86.298  | 13.07511141 | 0             | ** |
| siR_104374 | 0.01    | 32.744  | 11.67701486 | 7.84E-275     | ** |
| siR_104377 | 0.01    | 26.9262 | 11.39479493 | 3.93E-226     | ** |
| siR_104387 | 2.5169  | 0.7459  | -1.75459377 | 1.70E-07      | ** |
| siR_104389 | 10.3159 | 1.4918  | -2.78974366 | 1.06E-45      | ** |
| siR_104391 | 1.3471  | 0.1865  | -2.85260942 | 3.30E-07      | ** |
| siR_10441  | 13.7546 | 7.1604  | -0.9418021  | 2.83E-14      |    |
| siR_10443  | 26.6938 | 12.2697 | -1.12140472 | 2.03E-34      | ** |
| siR_104432 | 0.01    | 2.0885  | 7.70632333  | 3.21E-18      | ** |
| siR_104434 | 0.01    | 3.7667  | 8.55715732  | 2.87E-32      | ** |
| siR_104459 | 4.6085  | 0.7832  | -2.55684458 | 1.97E-19      | ** |
| siR_104471 | 19.3911 | 8.3538  | -1.21489014 | 1.10E-28      | ** |
| siR_104477 | 0.01    | 12.8664 | 10.32939273 | 1.93E-108     | ** |
| siR_104478 | 0.01    | 2.9089  | 8.18432989  | 4.35E-25      | ** |
| siR_104488 | 1.2053  | 0.4102  | -1.55499288 | 0.000989728   | ** |
| siR_104531 | 1.8788  | 1.1188  | -0.74785934 | 0.021928453   |    |
| siR_104556 | 1.0989  | 0.1492  | -2.88074067 | 3.93E-06      | ** |
| siR_104578 | 1.5243  | 1.9766  | 0.37487408  | 0.205681998   |    |
| siR_10458  | 0.6735  | 1.3053  | 0.95463157  | 0.018405953   |    |
| siR_104580 | 39.0304 | 21.4067 | -0.86653584 | 6.21E-33      |    |
| siR_104597 | 0.01    | 37.443  | 11.87048032 | 829344337875e | ** |
| siR_104598 | 0.01    | 4.5126  | 8.81781509  | 1.64E-38      | ** |
| siR_104599 | 0.01    | 1.5663  | 7.29121675  | 7.54E-14      | ** |
| siR_104600 | 0.01    | 1.0815  | 6.75688986  | 8.62E-10      | ** |
| siR_104605 | 0.01    | 19.169  | 10.90455936 | 3.37E-161     | ** |
| siR_104606 | 0.01    | 8.6895  | 9.76312936  | 1.78E-73      | ** |
| siR_104607 | 0.01    | 1.3053  | 7.02823761  | 1.15E-11      | ** |
| siR_104615 | 0.01    | 5.2957  | 9.04867759  | 4.56E-45      | ** |
| siR_104622 | 0.01    | 10.7406 | 10.06885887 | 1.20E-90      | ** |
| siR_104629 | 0.01    | 2.9835  | 8.22086197  | 1.03E-25      | ** |
| siR_104630 | 0.01    | 1.3799  | 7.10841991  | 2.74E-12      | ** |

|            |         |         |             |             |    |
|------------|---------|---------|-------------|-------------|----|
| siR_104652 | 3.5804  | 0.2238  | -3.99983883 | 1.38E-22    | ** |
| siR_104654 | 1.5598  | 0.1492  | -3.38604162 | 2.30E-09    | ** |
| siR_104720 | 3.4741  | 0.8578  | -2.01792606 | 1.33E-11    | ** |
| siR_104725 | 1.1698  | 0.3729  | -1.64940119 | 0.000716423 | ** |
| siR_104728 | 7.5154  | 4.4007  | -0.77211687 | 2.11E-06    |    |
| siR_104733 | 9.7842  | 3.7294  | -1.39151035 | 1.97E-18    | ** |
| siR_104756 | 1.2762  | 2.4987  | 0.96932326  | 0.000906952 |    |
| siR_104761 | 1.1344  | 0.2611  | -2.11925507 | 8.17E-05    | ** |
| siR_10478  | 0.01    | 1.0069  | 6.6537766   | 3.63E-09    | ** |
| siR_104789 | 1.028   | 0.5594  | -0.87788811 | 0.053501766 |    |
| siR_10481  | 9.6069  | 5.4076  | -0.82908253 | 1.17E-08    |    |
| siR_104820 | 2.3397  | 1.1934  | -0.97124588 | 0.001378704 |    |
| siR_104846 | 1.028   | 0.1865  | -2.46259273 | 4.21E-05    | ** |
| siR_104878 | 1.4889  | 0.2238  | -2.73396492 | 1.45E-07    | ** |
| siR_104885 | 1.028   | 0.2238  | -2.19955832 | 0.000127871 | ** |
| siR_104929 | 1.2762  | 0.634   | -1.00929969 | 0.015340798 | *  |
| siR_104936 | 1.8788  | 0.8578  | -1.13109828 | 0.001192693 | ** |
| siR_10494  | 1.3471  | 0.9696  | -0.47439535 | 0.198369951 |    |
| siR_104943 | 1.9497  | 2.4614  | 0.33622697  | 0.201834851 |    |
| siR_104945 | 63.2073 | 31.849  | -0.98884311 | 8.88E-65    |    |
| siR_104949 | 31.515  | 21.1083 | -0.57822827 | 4.82E-14    |    |
| siR_104953 | 10.245  | 10.032  | -0.03031073 | 0.805441753 |    |
| siR_104957 | 0.01    | 1.0069  | 6.6537766   | 3.63E-09    | ** |
| siR_10498  | 0.01    | 1.529   | 7.2564446   | 1.55E-13    | ** |
| siR_104985 | 3.5804  | 1.3426  | -1.41509123 | 8.85E-08    | ** |
| siR_105034 | 2.0915  | 0.1865  | -3.48729046 | 1.93E-12    | ** |
| siR_105038 | 2.3751  | 0.3356  | -2.82317364 | 1.07E-11    | ** |
| siR_105039 | 6.0974  | 1.6409  | -1.89370687 | 7.01E-18    | ** |
| siR_105043 | 1.1698  | 0.3356  | -1.80144727 | 0.000321486 | ** |
| siR_105044 | 9.9969  | 2.8716  | -1.79962599 | 1.43E-26    | ** |
| siR_105061 | 0.01    | 4.5499  | 8.82969103  | 8.00E-39    | ** |
| siR_105097 | 1.6307  | 1.1561  | -0.4962252  | 0.13940294  |    |
| siR_105109 | 0.01    | 1.3799  | 7.10841991  | 2.74E-12    | ** |
| siR_105112 | 3.6868  | 1.8647  | -0.98342561 | 4.74E-05    |    |
| siR_105181 | 0.01    | 1.8274  | 7.51364865  | 4.92E-16    | ** |
| siR_105189 | 1.418   | 0.8951  | -0.66373676 | 0.073755403 |    |
| siR_105194 | 1.9497  | 2.5733  | 0.40036751  | 0.124428273 |    |
| siR_105199 | 1.028   | 0.1865  | -2.46259273 | 4.21E-05    | ** |
| siR_105200 | 1.1698  | 0.1865  | -2.64901436 | 5.05E-06    | ** |
| siR_105217 | 4.6794  | 2.6479  | -0.82147492 | 8.07E-05    |    |
| siR_105233 | 1.0635  | 0.5594  | -0.92686787 | 0.039728581 |    |
| siR_105241 | 2.7296  | 2.3122  | -0.23942336 | 0.333027614 |    |
| siR_105243 | 1.5952  | 1.0442  | -0.61133925 | 0.07756025  |    |
| siR_105266 | 1.2053  | 0.7459  | -0.69233815 | 0.087734995 |    |
| siR_105283 | 90.3974 | 43.9322 | -1.04100253 | 8.59E-100   | ** |
| siR_105291 | 0.01    | 12.4189 | 10.27832168 | 1.08E-104   | ** |
| siR_105295 | 1.9497  | 2.3122  | 0.24601404  | 0.357540032 |    |

|            |          |          |             |             |    |
|------------|----------|----------|-------------|-------------|----|
| siR_105306 | 0.01     | 18.274   | 10.83557675 | 1.05E-153   | ** |
| siR_105312 | 14.8535  | 14.3954  | -0.04519504 | 0.658049617 |    |
| siR_105316 | 1.5243   | 2.7597   | 0.85636457  | 0.001671899 |    |
| siR_105334 | 3.545    | 1.268    | -1.48323088 | 3.54E-08    | ** |
| siR_10535  | 1.0989   | 0.4102   | -1.42166071 | 0.003288611 | ** |
| siR_10539  | 3.5804   | 1.6782   | -1.09320611 | 1.24E-05    | ** |
| siR_105401 | 2.7651   | 1.6782   | -0.720417   | 0.00696811  |    |
| siR_10543  | 0.01     | 5.4822   | 9.09861115  | 1.25E-46    | ** |
| siR_10544  | 0.01     | 1.1188   | 6.80580835  | 4.20E-10    | ** |
| siR_105456 | 20.561   | 7.6452   | -1.42728428 | 2.18E-38    | ** |
| siR_105503 | 5.3884   | 2.6106   | -1.04547553 | 2.22E-07    | ** |
| siR_105509 | 4.3958   | 1.7155   | -1.35749662 | 9.02E-09    | ** |
| siR_105523 | 1.0989   | 0.1492   | -2.88074067 | 3.93E-06    | ** |
| siR_105527 | 2.0561   | 0.2984   | -2.78459099 | 3.65E-10    | ** |
| siR_10553  | 0.01     | 17.64    | 10.78463485 | 2.13E-148   | ** |
| siR_10554  | 0.01     | 2.9462   | 8.20271156  | 2.12E-25    | ** |
| siR_10555  | 0.01     | 2.2003   | 7.78155643  | 3.72E-19    | ** |
| siR_105554 | 1.6307   | 0.9323   | -0.80662522 | 0.022857287 |    |
| siR_105556 | 3.7222   | 2.8716   | -0.37430077 | 0.083577749 |    |
| siR_10556  | 0.01     | 1.7528   | 7.45351758  | 2.07E-15    | ** |
| siR_105564 | 1.8434   | 1.4172   | -0.37932579 | 0.219749998 |    |
| siR_105581 | 0.01     | 2.6106   | 8.02823761  | 1.37E-22    | ** |
| siR_105589 | 1.4889   | 0.5221   | -1.5118488  | 0.000322184 | ** |
| siR_10559  | 33.4648  | 13.8733  | -1.27033339 | 1.14E-51    | ** |
| siR_10560  | 2.9778   | 1.3426   | -1.14921731 | 3.39E-05    | ** |
| siR_10561  | 1.2762   | 0.5221   | -1.28945638 | 0.003202105 | ** |
| siR_105624 | 3.0841   | 1.0442   | -1.56245148 | 9.42E-08    | ** |
| siR_105636 | 0.01     | 4.7363   | 8.88761665  | 2.20E-40    | ** |
| siR_105637 | 0.01     | 2.6479   | 8.04870483  | 6.67E-23    | ** |
| siR_10564  | 1.3116   | 0.1865   | -2.81408027 | 5.73E-07    | ** |
| siR_105641 | 0.01     | 20.7727  | 11.02047303 | 1.27E-174   | ** |
| siR_105659 | 8.9334   | 1.3053   | -2.77482794 | 1.45E-39    | ** |
| siR_105660 | 16.9096  | 2.5733   | -2.71615097 | 7.55E-72    | ** |
| siR_105696 | 4.7503   | 3.2073   | -0.56665932 | 0.004171898 |    |
| siR_105698 | 15.2435  | 11.934   | -0.35311651 | 0.000877185 |    |
| siR_105704 | 14.9244  | 10.032   | -0.57306368 | 2.72E-07    |    |
| siR_10571  | 5.1048   | 1.4545   | -1.81133114 | 2.12E-14    | ** |
| siR_105740 | 0.01     | 1.1561   | 6.85312238  | 2.05E-10    | ** |
| siR_105742 | 0.01     | 2.4614   | 7.94333532  | 2.43E-21    | ** |
| siR_10576  | 1.1344   | 0.4102   | -1.46753004 | 0.002218064 | ** |
| siR_105788 | 26.4102  | 3.3192   | -2.99218776 | 6.55E-123   | ** |
| siR_105794 | 660.7871 | 476.3918 | -0.47203694 | 2.51E-181   |    |
| siR_105795 | 3.9704   | 1.9393   | -1.03374836 | 1.08E-05    | ** |
| siR_105832 | 6.0619   | 1.4172   | -2.09672668 | 4.17E-20    | ** |
| siR_105834 | 4.9275   | 3.7294   | -0.40191233 | 0.033172498 |    |
| siR_105835 | 4.9984   | 4.438    | -0.17155669 | 0.340851725 |    |
| siR_105836 | 3.4032   | 1.6409   | -1.05240462 | 3.61E-05    | ** |

|            |         |          |             |             |    |
|------------|---------|----------|-------------|-------------|----|
| siR_105838 | 1.2407  | 1.3053   | 0.07322711  | 0.830255381 |    |
| siR_105846 | 0.01    | 3.9159   | 8.61320011  | 1.62E-33    | ** |
| siR_105850 | 0.01    | 171.8501 | 14.06886307 | 0           | ** |
| siR_105851 | 0.01    | 9.0624   | 9.82374936  | 1.35E-76    | ** |
| siR_105852 | 0.01    | 1.1934   | 6.89893387  | 9.98E-11    | ** |
| siR_105858 | 21.6245 | 9.9202   | -1.12422566 | 2.66E-28    | ** |
| siR_105859 | 19.0366 | 9.1743   | -1.05310584 | 9.58E-23    | ** |
| siR_105860 | 5.3175  | 2.3868   | -1.15567045 | 2.42E-08    | ** |
| siR_105861 | 2.4106  | 1.1561   | -1.06012609 | 0.000482579 | ** |
| siR_105870 | 1.6307  | 1.268    | -0.36293665 | 0.268725219 |    |
| siR_105873 | 0.01    | 1.3426   | 7.06888574  | 5.63E-12    | ** |
| siR_105894 | 0.01    | 4.7363   | 8.88761665  | 2.20E-40    | ** |
| siR_105902 | 4.1831  | 2.2749   | -0.87876936 | 7.95E-05    |    |
| siR_105907 | 1.8079  | 0.3356   | -2.42950026 | 5.31E-08    | ** |
| siR_105927 | 1.1344  | 0.9323   | -0.28306327 | 0.468279224 |    |
| siR_105928 | 4.254   | 2.2003   | -0.95111979 | 2.11E-05    |    |
| siR_105933 | 0.01    | 9.771    | 9.93236241  | 1.58E-82    | ** |
| siR_105934 | 0.01    | 1.0069   | 6.6537766   | 3.63E-09    | ** |
| siR_10594  | 1.0989  | 0.3729   | -1.5591994  | 0.001653799 | ** |
| siR_105943 | 71.0417 | 46.319   | -0.617062   | 3.66E-33    |    |
| siR_105944 | 2.5878  | 1.6409   | -0.6572388  | 0.016082512 |    |
| siR_105965 | 2.2688  | 1.1188   | -1.01997728 | 0.001040485 | ** |
| siR_105969 | 0.01    | 2.4241   | 7.9213054   | 4.98E-21    | ** |
| siR_105978 | 0.01    | 1.4172   | 7.14689956  | 1.34E-12    | ** |
| siR_105981 | 1.4889  | 0.4475   | -1.73428727 | 7.26E-05    | ** |
| siR_105989 | 3.7577  | 1.1188   | -1.74789773 | 1.67E-10    | ** |
| siR_106020 | 4.8566  | 1.4172   | -1.7769033  | 1.90E-13    | ** |
| siR_106021 | 7.7281  | 7.7944   | 0.01232421  | 0.928454449 |    |
| siR_106026 | 15.5271 | 9.5845   | -0.69601333 | 4.53E-10    |    |
| siR_106032 | 11.5212 | 8.5403   | -0.43193234 | 0.000485156 |    |
| siR_106034 | 0.01    | 1.1561   | 6.85312238  | 2.05E-10    | ** |
| siR_106046 | 1.1698  | 0.4102   | -1.5118625  | 0.001486275 | ** |
| siR_106048 | 0.01    | 1.3053   | 7.02823761  | 1.15E-11    | ** |
| siR_106066 | 2.1979  | 0.5221   | -2.07372768 | 4.84E-08    | ** |
| siR_106084 | 2.6942  | 1.7155   | -0.65122783 | 0.014824002 |    |
| siR_106170 | 8.3662  | 2.797    | -1.58069223 | 5.58E-19    | ** |
| siR_106229 | 0.01    | 1.5663   | 7.29121675  | 7.54E-14    | ** |
| siR_106250 | 3.2968  | 1.0069   | -1.71114596 | 3.83E-09    | ** |
| siR_106257 | 0.01    | 3.431    | 8.42248532  | 1.85E-29    | ** |
| siR_106261 | 1.9143  | 0.5967   | -1.68173926 | 1.01E-05    | ** |
| siR_106275 | 3.2259  | 0.8578   | -1.9109885  | 3.26E-10    | ** |
| siR_106297 | 1.0989  | 0.634    | -0.79350536 | 0.066742311 |    |
| siR_106329 | 2.0561  | 0.3729   | -2.46304973 | 4.71E-09    | ** |
| siR_106339 | 1.0635  | 0.4475   | -1.24886045 | 0.008857046 | ** |
| siR_106394 | 1.9143  | 1.3799   | -0.47225322 | 0.12532649  |    |
| siR_106407 | 0.01    | 1.8274   | 7.51364865  | 4.92E-16    | ** |
| siR_106423 | 0.01    | 1.6036   | 7.32517051  | 3.67E-14    | ** |

|            |         |         |             |             |    |
|------------|---------|---------|-------------|-------------|----|
| siR_106428 | 4.6439  | 3.6175  | -0.36034389 | 0.061918472 |    |
| siR_106430 | 1.737   | 0.4102  | -2.08219836 | 1.23E-06    | ** |
| siR_106433 | 1.2762  | 0.5221  | -1.28945638 | 0.003202105 | ** |
| siR_106438 | 4.3249  | 1.6782  | -1.36575212 | 1.02E-08    | ** |
| siR_106443 | 29.4589 | 11.4492 | -1.36345677 | 9.41E-51    | ** |
| siR_106454 | 1.3471  | 0.4848  | -1.47439535 | 0.000796247 | ** |
| siR_106460 | 1.737   | 0.5967  | -1.54152007 | 7.89E-05    | ** |
| siR_106464 | 0.01    | 4.0277  | 8.65381242  | 1.88E-34    | ** |
| siR_106474 | 0.01    | 3.431   | 8.42248532  | 1.85E-29    | ** |
| siR_106475 | 0.01    | 1.902   | 7.57137344  | 1.17E-16    | ** |
| siR_106487 | 150.166 | 28.679  | -2.38849158 | 0           | ** |
| siR_106490 | 10.7768 | 1.1934  | -3.17477927 | 4.65E-54    | ** |
| siR_106531 | 1.0635  | 0.2238  | -2.24853809 | 7.77E-05    | ** |
| siR_106532 | 10.9186 | 5.2211  | -1.06436219 | 6.69E-14    | ** |
| siR_106533 | 1.2407  | 0.5967  | -1.05607663 | 0.013149564 | *  |
| siR_106542 | 1.9143  | 0.7086  | -1.43377357 | 8.42E-05    | ** |
| siR_106548 | 1.0989  | 0.5594  | -0.97410795 | 0.02925074  |    |
| siR_106557 | 1.5952  | 0.9696  | -0.71827571 | 0.041817619 |    |
| siR_106563 | 1.9852  | 0.634   | -1.64672961 | 9.33E-06    | ** |
| siR_106568 | 2.3397  | 1.529   | -0.61373515 | 0.031403936 |    |
| siR_106577 | 1.1344  | 0.1492  | -2.92661    | 2.25E-06    | ** |
| siR_106588 | 1.3471  | 0.4848  | -1.47439535 | 0.000796247 | ** |
| siR_106590 | 3.0487  | 1.1188  | -1.44624203 | 5.38E-07    | ** |
| siR_106597 | 2.6233  | 1.4172  | -0.88833943 | 0.001654224 |    |
| siR_106599 | 6.7709  | 3.9159  | -0.79000369 | 4.41E-06    |    |
| siR_106603 | 1.3116  | 0.1492  | -3.13600837 | 1.33E-07    | ** |
| siR_106621 | 2.8714  | 0.4848  | -2.56629271 | 1.17E-12    | ** |
| siR_106623 | 1.5952  | 0.6713  | -1.24870777 | 0.00126596  | ** |
| siR_106629 | 1.3116  | 0.3356  | -1.96651319 | 5.19E-05    | ** |
| siR_106633 | 5.4593  | 0.7459  | -2.87166185 | 1.35E-25    | ** |
| siR_106635 | 10.3514 | 2.2749  | -2.18595087 | 5.58E-35    | ** |
| siR_106643 | 1.3825  | 0.3356  | -2.04246486 | 2.03E-05    | ** |
| siR_106647 | 16.6969 | 3.3192  | -2.3306728  | 7.81E-60    | ** |
| siR_106648 | 6.3101  | 1.2307  | -2.35818374 | 6.95E-24    | ** |
| siR_106649 | 2.2688  | 0.5594  | -2.01997728 | 4.96E-08    | ** |
| siR_106654 | 15.2435 | 2.4614  | -2.63064316 | 9.45E-63    | ** |
| siR_106666 | 9.5715  | 1.3426  | -2.83371549 | 3.41E-43    | ** |
| siR_106674 | 5.1757  | 2.536   | -1.02919925 | 5.41E-07    | ** |
| siR_106678 | 3.4032  | 0.1865  | -4.1896444  | 3.46E-22    | ** |
| siR_106679 | 1.737   | 0.1492  | -3.54127831 | 1.20E-10    | ** |
| siR_106683 | 2.836   | 1.6409  | -0.78937021 | 0.003088094 |    |
| siR_106689 | 1.0635  | 1.1188  | 0.07313213  | 0.842404071 |    |
| siR_106699 | 4.573   | 2.4241  | -0.9156917  | 1.93E-05    |    |
| siR_106703 | 0.01    | 3.6921  | 8.52829782  | 1.21E-31    | ** |
| siR_106731 | 1.6661  | 0.1492  | -3.48115555 | 3.94E-10    | ** |
| siR_106733 | 1.8079  | 0.5967  | -1.5992372  | 3.50E-05    | ** |
| siR_106755 | 0.01    | 1.0442  | 6.70625425  | 1.77E-09    | ** |

|            |          |         |             |             |    |
|------------|----------|---------|-------------|-------------|----|
| siR_106767 | 40.342   | 14.2836 | -1.49792297 | 4.96E-79    | ** |
| siR_106771 | 560.1093 | 93.1974 | -2.58734677 | 0           | ** |
| siR_106783 | 3.5095   | 1.1561  | -1.60199931 | 6.55E-09    | ** |
| siR_106784 | 56.8617  | 8.1301  | -2.80611223 | 8.13E-246   | ** |
| siR_106809 | 1.8434   | 1.8647  | 0.01657439  | 0.951365627 |    |
| siR_106823 | 1.3116   | 0.2984  | -2.13600837 | 1.97E-05    | ** |
| siR_106854 | 1.2762   | 0.1865  | -2.7746069  | 9.92E-07    | ** |
| siR_10686  | 0.01     | 1.2307  | 6.94333532  | 4.86E-11    | ** |
| siR_106866 | 1.2762   | 0.1865  | -2.7746069  | 9.92E-07    | ** |
| siR_106903 | 10.635   | 6.7129  | -0.66381198 | 7.56E-07    |    |
| siR_106922 | 2.127    | 0.3729  | -2.51195933 | 1.67E-09    | ** |
| siR_106927 | 1.3116   | 0.4848  | -1.4358662  | 0.001178471 | ** |
| siR_106946 | 1.3116   | 0.1119  | -3.55104587 | 2.52E-08    | ** |
| siR_106963 | 2.127    | 0.2984  | -2.83350059 | 1.22E-10    | ** |
| siR_106971 | 9.6778   | 10.666  | 0.1402682   | 0.250348493 |    |
| siR_106973 | 1.5598   | 0.9696  | -0.68589945 | 0.053332237 |    |
| siR_106974 | 7.0545   | 6.8621  | -0.03989368 | 0.788407459 |    |
| siR_106976 | 1.9852   | 1.902   | -0.06176711 | 0.828340635 |    |
| siR_106977 | 1.5243   | 2.2749  | 0.57765626  | 0.043445592 |    |
| siR_107016 | 3.0841   | 1.0815  | -1.51181588 | 1.88E-07    | ** |
| siR_107022 | 1.8434   | 0.7832  | -1.23491649 | 0.000580844 | ** |
| siR_107026 | 3.7577   | 2.1258  | -0.82184402 | 0.000413696 |    |
| siR_107031 | 2.4815   | 0.634   | -1.96865771 | 2.00E-08    | ** |
| siR_107049 | 1.0989   | 0.6713  | -0.71103056 | 0.095545863 |    |
| siR_107052 | 6.4873   | 2.0885  | -1.63515101 | 1.01E-15    | ** |
| siR_107071 | 1.8788   | 0.6713  | -1.48478195 | 6.40E-05    | ** |
| siR_107115 | 0.01     | 1.0815  | 6.75688986  | 8.62E-10    | ** |
| siR_107130 | 1.1698   | 0.5594  | -1.06430974 | 0.015477614 | *  |
| siR_107133 | 2.3042   | 0.9696  | -1.24880434 | 0.000101264 | ** |
| siR_107135 | 3.4741   | 0.5967  | -2.5415616  | 6.84E-15    | ** |
| siR_107145 | 1.9143   | 2.1258  | 0.15118893  | 0.580827286 |    |
| siR_107148 | 5.672    | 4.2888  | -0.40328349 | 0.021822993 |    |
| siR_107149 | 1.3471   | 1.2307  | -0.13037782 | 0.709114022 |    |
| siR_107155 | 3.6513   | 3.2446  | -0.17036958 | 0.419480187 |    |
| siR_10716  | 0.01     | 4.2142  | 8.71911497  | 5.16E-36    | ** |
| siR_107176 | 1.9143   | 0.1865  | -3.3595694  | 3.64E-11    | ** |
| siR_107180 | 0.01     | 2.0139  | 7.65384824  | 1.35E-17    | ** |
| siR_107198 | 6.0619   | 3.5429  | -0.77483931 | 1.95E-05    |    |
| siR_107205 | 2.0561   | 0.9323  | -1.14104426 | 0.000635096 | ** |
| siR_107225 | 1.1344   | 0.3729  | -1.60506874 | 0.001091833 | ** |
| siR_107228 | 5.2111   | 1.6409  | -1.66710062 | 3.15E-13    | ** |
| siR_107229 | 2.3042   | 1.0069  | -1.19434554 | 0.000174233 | ** |
| siR_107234 | 12.4784  | 3.0208  | -2.04643039 | 1.31E-38    | ** |
| siR_107236 | 1.4534   | 0.2238  | -2.69914987 | 2.49E-07    | ** |
| siR_107243 | 3.9704   | 1.0442  | -1.9268863  | 2.21E-12    | ** |
| siR_107270 | 1.3116   | 0.1865  | -2.81408027 | 5.73E-07    | ** |
| siR_107277 | 2.3751   | 0.9323  | -1.34912209 | 2.78E-05    | ** |

|            |           |          |              |              |    |
|------------|-----------|----------|--------------|--------------|----|
| siR_107278 | 2. 5878   | 0. 5594  | -2. 20977396 | 6. 74E-10    | ** |
| siR_107287 | 2. 7651   | 0. 634   | -2. 12477691 | 4. 71E-10    | ** |
| siR_107290 | 64. 0581  | 16. 2974 | -1. 97473918 | 2. 00E-182   | ** |
| siR_107291 | 1. 028    | 0. 1865  | -2. 46259273 | 4. 21E-05    | ** |
| siR_107295 | 1. 2407   | 0. 3356  | -1. 88633969 | 0. 000130463 | ** |
| siR_107298 | 1. 737    | 0. 5594  | -1. 63464559 | 3. 81E-05    | ** |
| siR_107302 | 1. 2762   | 0. 3729  | -1. 77499374 | 0. 000195629 | ** |
| siR_107309 | 10. 1387  | 2. 6479  | -1. 93695214 | 1. 42E-29    | ** |
| siR_107316 | 3. 8995   | 0. 8205  | -2. 24871391 | 1. 58E-14    | ** |
| siR_107317 | 10. 4577  | 0. 9323  | -3. 48762751 | 5. 07E-57    | ** |
| siR_107326 | 0. 01     | 1. 0442  | 6. 70625425  | 1. 77E-09    | ** |
| siR_107334 | 1. 9143   | 0. 3356  | -2. 51200232 | 1. 12E-08    | ** |
| siR_107335 | 3. 8286   | 1. 7901  | -1. 09677676 | 5. 80E-06    | ** |
| siR_107337 | 0. 01     | 2. 1258  | 7. 73186206  | 1. 57E-18    | ** |
| siR_107341 | 4. 1831   | 1. 4172  | -1. 56152912 | 4. 86E-10    | ** |
| siR_107369 | 2. 0561   | 1. 1561  | -0. 83064424 | 0. 00863454  |    |
| siR_107404 | 1. 0635   | 0. 8578  | -0. 31010681 | 0. 443941845 |    |
| siR_107406 | 3. 8995   | 4. 9228  | 0. 33618998  | 0. 070732359 |    |
| siR_107409 | 1. 4534   | 0. 7459  | -0. 96237768 | 0. 012720128 |    |
| siR_107436 | 16. 9805  | 16. 2228 | -0. 0658561  | 0. 491525524 |    |
| siR_107456 | 1. 9497   | 0. 4848  | -2. 00779055 | 4. 97E-07    | ** |
| siR_107471 | 0. 01     | 2. 0512  | 7. 68032436  | 6. 59E-18    | ** |
| siR_107479 | 1. 1698   | 1. 9766  | 0. 75675905  | 0. 016942715 |    |
| siR_107481 | 0. 01     | 1. 2307  | 6. 94333532  | 4. 86E-11    | ** |
| siR_107498 | 7. 3736   | 3. 2819  | -1. 16783788 | 3. 33E-11    | ** |
| siR_107502 | 165. 6222 | 47. 8853 | -1. 79024132 | 0            | ** |
| siR_107506 | 5. 1048   | 1. 268   | -2. 00929969 | 2. 55E-16    | ** |
| siR_107524 | 4. 1831   | 1. 2307  | -1. 76509336 | 1. 12E-11    | ** |
| siR_107527 | 1. 6307   | 0. 634   | -1. 36293665 | 0. 000487944 | ** |
| siR_107532 | 0. 8508   | 1. 7901  | 1. 07314824  | 0. 002307791 | ** |
| siR_107547 | 2. 127    | 0. 8205  | -1. 37424479 | 5. 86E-05    | ** |
| siR_10755  | 0. 01     | 2. 0885  | 7. 70632333  | 3. 21E-18    | ** |
| siR_107581 | 3. 4032   | 0. 5594  | -2. 60493978 | 5. 54E-15    | ** |
| siR_107608 | 1. 1698   | 0. 1865  | -2. 64901436 | 5. 05E-06    | ** |
| siR_10762  | 1. 3825   | 0. 8951  | -0. 62715871 | 0. 093219647 |    |
| siR_107632 | 0. 01     | 9. 9575  | 9. 95963976  | 4. 33E-84    | ** |
| siR_107633 | 0. 01     | 1. 1561  | 6. 85312238  | 2. 05E-10    | ** |
| siR_107656 | 4. 8212   | 1. 1934  | -2. 0143146  | 1. 55E-15    | ** |
| siR_107658 | 2. 1979   | 0. 4102  | -2. 42172635 | 1. 96E-09    | ** |
| siR_107669 | 2. 0915   | 1. 4918  | -0. 48748387 | 0. 09876211  |    |
| siR_107702 | 1. 0635   | 0. 2984  | -1. 83350059 | 0. 000528454 | ** |
| siR_107718 | 6. 7      | 2. 4241  | -1. 46671188 | 4. 92E-14    | ** |
| siR_107720 | 0. 1418   | 1. 529   | 3. 43065897  | 1. 91E-09    | ** |
| siR_107726 | 0. 4254   | 1. 529   | 1. 84569647  | 2. 35E-05    | ** |
| siR_107736 | 1. 5952   | 0. 5221  | -1. 61133925 | 9. 52E-05    | ** |
| siR_107743 | 1. 9497   | 0. 2984  | -2. 70793271 | 1. 86E-09    | ** |
| siR_107744 | 8. 2598   | 0. 7086  | -3. 54306348 | 6. 08E-46    | ** |



|            |         |         |             |             |    |
|------------|---------|---------|-------------|-------------|----|
| siR_107745 | 0.01    | 1.268   | 6.98641094  | 2.37E-11    | ** |
| siR_107764 | 2.1979  | 1.1561  | -0.92685956 | 0.002876534 |    |
| siR_107785 | 0.01    | 1.268   | 6.98641094  | 2.37E-11    | ** |
| siR_107788 | 1.1344  | 1.3053  | 0.20245198  | 0.566494718 |    |
| siR_107797 | 1.3116  | 0.4475  | -1.55136822 | 0.000594069 | ** |
| siR_107805 | 1.7725  | 0.2984  | -2.57046619 | 2.67E-08    | ** |
| siR_107808 | 15.598  | 2.6479  | -2.55844051 | 2.97E-62    | ** |
| siR_107847 | 12.9747 | 2.0885  | -2.63516213 | 9.42E-54    | ** |
| siR_107850 | 2.0206  | 0.1865  | -3.43753622 | 6.27E-12    | ** |
| siR_107861 | 1.0635  | 0.4102  | -1.37442064 | 0.004842593 | ** |
| siR_107868 | 1.028   | 0.1865  | -2.46259273 | 4.21E-05    | ** |
| siR_107875 | 1.5243  | 0.9323  | -0.7092807  | 0.049206351 |    |
| siR_107892 | 1.9497  | 1.1561  | -0.75398596 | 0.018682205 |    |
| siR_107896 | 15.6334 | 2.2749  | -2.78075654 | 3.30E-68    | ** |
| siR_107897 | 8.7207  | 1.529   | -2.51185554 | 8.44E-35    | ** |
| siR_107905 | 1.6307  | 0.2238  | -2.86520945 | 1.63E-08    | ** |
| siR_107931 | 0.0709  | 41.62   | 9.19727562  | 0           | ** |
| siR_107938 | 0.01    | 90.5495 | 13.14449096 | 0           | ** |
| siR_107939 | 0.01    | 1.6409  | 7.35834351  | 1.79E-14    | ** |
| siR_107940 | 0.01    | 1.4918  | 7.22091032  | 3.17E-13    | ** |
| siR_107942 | 0.01    | 7.6452  | 9.57841043  | 9.81E-65    | ** |
| siR_107943 | 0.01    | 2.163   | 7.75688986  | 7.63E-19    | ** |
| siR_107944 | 0.01    | 1.9766  | 7.62687714  | 2.78E-17    | ** |
| siR_107945 | 0.01    | 1.6409  | 7.35834351  | 1.79E-14    | ** |
| siR_107969 | 1.1698  | 0.1492  | -2.97094245 | 1.28E-06    | ** |
| siR_10797  | 5.8492  | 1.9766  | -1.56521837 | 1.56E-13    | ** |
| siR_107996 | 2.4815  | 0.5967  | -2.05613477 | 7.78E-09    | ** |
| siR_108054 | 1.9143  | 0.4848  | -1.98135534 | 7.91E-07    | ** |
| siR_10810  | 0.01    | 4.065   | 8.66711154  | 9.14E-35    | ** |
| siR_108105 | 2.1979  | 0.2611  | -3.07345139 | 9.26E-12    | ** |
| siR_108107 | 12.2657 | 1.2307  | -3.31707854 | 8.56E-64    | ** |
| siR_108108 | 1.3116  | 0.1492  | -3.13600837 | 1.33E-07    | ** |
| siR_10812  | 18.6467 | 14.2463 | -0.38833306 | 5.74E-05    |    |
| siR_108125 | 0.01    | 3.3192  | 8.37469175  | 1.60E-28    | ** |
| siR_108174 | 0.01    | 1.7528  | 7.45351758  | 2.07E-15    | ** |
| siR_108182 | 0.8153  | 1.8274  | 1.16438954  | 0.001007954 | ** |
| siR_108184 | 29.4235 | 17.3416 | -0.76273186 | 1.39E-20    |    |
| siR_108187 | 2.5878  | 0.5594  | -2.20977396 | 6.74E-10    | ** |
| siR_1082   | 1.2053  | 1.529   | 0.34319613  | 0.305714682 |    |
| siR_108206 | 1.6661  | 0.4848  | -1.78101339 | 1.86E-05    | ** |
| siR_108213 | 18.1858 | 13.3512 | -0.44584298 | 6.31E-06    |    |
| siR_108214 | 1.1344  | 1.3053  | 0.20245198  | 0.566494718 |    |
| siR_108264 | 1.8079  | 0.5221  | -1.79191682 | 7.37E-06    | ** |
| siR_108293 | 1.1344  | 0.4102  | -1.46753004 | 0.002218064 | ** |
| siR_108337 | 5.2466  | 2.2003  | -1.25368256 | 3.43E-09    | ** |
| siR_108364 | 10.245  | 6.1908  | -0.72672223 | 1.47E-07    |    |
| siR_108366 | 3.545   | 3.3192  | -0.09495007 | 0.654066795 |    |

|            |          |          |              |              |    |
|------------|----------|----------|--------------|--------------|----|
| siR_108370 | 1. 0989  | 1. 4545  | 0. 40446319  | 0. 244629409 |    |
| siR_108388 | 6. 2037  | 2. 9089  | -1. 09265522 | 8. 24E-09    | ** |
| siR_10839  | 2. 9423  | 3. 0208  | 0. 03798632  | 0. 864606992 |    |
| siR_108395 | 1. 8434  | 0. 6713  | -1. 45733961 | 9. 44E-05    | ** |
| siR_108408 | 19. 6393 | 9. 2489  | -1. 08638981 | 1. 51E-24    | ** |
| siR_108415 | 0. 01    | 4. 3634  | 8. 76930892  | 2. 91E-37    | ** |
| siR_108417 | 3. 5804  | 0. 7086  | -2. 3370774  | 5. 08E-14    | ** |
| siR_108426 | 8. 0471  | 3. 8786  | -1. 05293296 | 1. 85E-10    | ** |
| siR_108428 | 1. 5952  | 0. 4475  | -1. 83377773 | 1. 94E-05    | ** |
| siR_108438 | 2. 4106  | 0. 3356  | -2. 84457766 | 6. 21E-12    | ** |
| siR_108463 | 2. 4106  | 1. 5663  | -0. 62203171 | 0. 027029908 |    |
| siR_108465 | 2. 9423  | 1. 1561  | -1. 34767816 | 3. 05E-06    | ** |
| siR_108467 | 1. 3471  | 0. 634   | -1. 08730221 | 0. 008088456 | ** |
| siR_108480 | 2. 7296  | 1. 529   | -0. 83610115 | 0. 002296406 |    |
| siR_10849  | 0. 01    | 5. 6314  | 9. 13734982  | 7. 07E-48    | ** |
| siR_108494 | 2. 0206  | 0. 2611  | -2. 95210939 | 1. 53E-10    | ** |
| siR_108507 | 6. 2392  | 2. 7597  | -1. 17684961 | 8. 55E-10    | ** |
| siR_108511 | 9. 217   | 0. 6713  | -3. 7792677  | 9. 00E-54    | ** |
| siR_108529 | 1. 5243  | 0. 2611  | -2. 54547251 | 3. 07E-07    | ** |
| siR_108593 | 1. 5243  | 0. 4102  | -1. 89374747 | 2. 00E-05    | ** |
| siR_108598 | 14. 1091 | 5. 6687  | -1. 31553614 | 6. 64E-24    | ** |
| siR_108599 | 1. 2053  | 0. 3729  | -1. 69253158 | 0. 000467353 | ** |
| siR_108600 | 2. 3751  | 0. 2984  | -2. 99266882 | 2. 53E-12    | ** |
| siR_108601 | 1. 1698  | 0. 2611  | -2. 16358753 | 5. 01E-05    | ** |
| siR_108605 | 1. 8434  | 1. 1188  | -0. 720417   | 0. 02804556  |    |
| siR_10862  | 4. 3958  | 1. 3799  | -1. 67156203 | 2. 06E-11    | ** |
| siR_10863  | 1. 5598  | 0. 2984  | -2. 38604162 | 6. 01E-07    | ** |
| siR_108642 | 2. 0561  | 0. 4102  | -2. 32551104 | 1. 49E-08    | ** |
| siR_108651 | 1. 5243  | 1. 3799  | -0. 14358315 | 0. 661720724 |    |
| siR_108659 | 1. 1344  | 0. 2984  | -1. 92661    | 0. 000211792 | ** |
| siR_108670 | 2. 9778  | 1. 1561  | -1. 36498067 | 2. 12E-06    | ** |
| siR_108732 | 75. 473  | 43. 2982 | -0. 80165357 | 1. 45E-54    |    |
| siR_108739 | 0. 6735  | 1. 3053  | 0. 95463157  | 0. 018405953 |    |
| siR_108750 | 8. 0471  | 7. 1977  | -0. 16093299 | 0. 255323864 |    |
| siR_108753 | 11. 0604 | 5. 072   | -1. 12477691 | 3. 09E-15    | ** |
| siR_108773 | 1. 4534  | 0. 5967  | -1. 28435413 | 0. 001680536 | ** |
| siR_108776 | 5. 282   | 2. 2749  | -1. 21528117 | 7. 18E-09    | ** |
| siR_1088   | 0. 01    | 8. 5776  | 9. 74443023  | 1. 54E-72    | ** |
| siR_10880  | 5. 282   | 3. 7294  | -0. 50214076 | 0. 006763845 |    |
| siR_108809 | 1. 1698  | 0. 0746  | -3. 97094245 | 4. 33E-08    | ** |
| siR_10881  | 2. 0561  | 0. 7459  | -1. 4628563  | 3. 48E-05    | ** |
| siR_108818 | 30. 3452 | 22. 6747 | -0. 42038487 | 3. 26E-08    |    |
| siR_108823 | 7. 4445  | 0. 5594  | -3. 7342228  | 2. 61E-43    | ** |
| siR_108824 | 71. 2899 | 8. 6149  | -3. 04879174 | 0            | ** |
| siR_108893 | 1. 5243  | 0. 3356  | -2. 18333225 | 2. 95E-06    | ** |
| siR_10890  | 1. 0635  | 0. 5967  | -0. 83374235 | 0. 060029399 |    |
| siR_108907 | 2. 0561  | 0. 5967  | -1. 78483275 | 1. 81E-06    | ** |

|            |          |         |             |             |    |
|------------|----------|---------|-------------|-------------|----|
| siR_108918 | 2.127    | 0.5594  | -1.92686787 | 3.13E-07    | ** |
| siR_108927 | 3.2259   | 1.4545  | -1.14917842 | 1.58E-05    | ** |
| siR_108933 | 1.8079   | 0.7459  | -1.27726075 | 0.000470054 | ** |
| siR_108937 | 2.3751   | 0.5967  | -1.99291058 | 3.15E-08    | ** |
| siR_108946 | 3.9349   | 2.9089  | -0.43585327 | 0.040346039 |    |
| siR_10895  | 1.1344   | 0.2238  | -2.3416475  | 2.83E-05    | ** |
| siR_108974 | 1.2407   | 0.3729  | -1.73429361 | 0.000303178 | ** |
| siR_10898  | 5.7429   | 1.6782  | -1.77486478 | 1.27E-15    | ** |
| siR_10899  | 1.0989   | 0.0746  | -3.88074067 | 1.47E-07    | ** |
| siR_109009 | 1.2053   | 0.7086  | -0.76634891 | 0.062096306 |    |
| siR_109010 | 1.0989   | 0.2611  | -2.07338574 | 0.000132441 | ** |
| siR_10902  | 1.2053   | 0.1865  | -2.69214474 | 2.94E-06    | ** |
| siR_109028 | 27.97    | 15.6261 | -0.8399225  | 6.70E-23    |    |
| siR_109078 | 1.2407   | 0.4102  | -1.59675492 | 0.000655154 | ** |
| siR_109102 | 4.0058   | 2.9835  | -0.42508462 | 0.043236583 |    |
| siR_109104 | 0.01     | 1.4172  | 7.14689956  | 1.34E-12    | ** |
| siR_10915  | 0.01     | 2.7225  | 8.08878824  | 1.58E-23    | ** |
| siR_109157 | 2.446    | 0.8578  | -1.51171118 | 3.61E-06    | ** |
| siR_109185 | 1.9497   | 1.2307  | -0.66377303 | 0.035430769 |    |
| siR_109215 | 8.1889   | 1.6036  | -2.35235535 | 1.81E-30    | ** |
| siR_109222 | 0.01     | 1.268   | 6.98641094  | 2.37E-11    | ** |
| siR_109225 | 0.01     | 1.0442  | 6.70625425  | 1.77E-09    | ** |
| siR_109238 | 0.01     | 6.34    | 9.30833903  | 8.28E-54    | ** |
| siR_109242 | 0.01     | 1.4918  | 7.22091032  | 3.17E-13    | ** |
| siR_109245 | 0.01     | 2.1258  | 7.73186206  | 1.57E-18    | ** |
| siR_109252 | 109.3986 | 42.7388 | -1.35597597 | 5.67E-182   | ** |
| siR_109253 | 1.6661   | 0.6713  | -1.31144545 | 0.00061799  | ** |
| siR_109263 | 2.6233   | 0.1865  | -3.81413527 | 2.45E-16    | ** |
| siR_10927  | 3.864    | 2.6106  | -0.56571367 | 0.009937994 |    |
| siR_109280 | 2.2333   | 0.4475  | -2.31921747 | 3.70E-09    | ** |
| siR_109284 | 3.3677   | 0.7832  | -2.10431096 | 7.84E-12    | ** |
| siR_109289 | 32.3304  | 33.6391 | 0.05724775  | 0.397838477 |    |
| siR_109293 | 22.6525  | 21.8915 | -0.04929947 | 0.550768774 |    |
| siR_109299 | 19.9938  | 26.2922 | 0.39508217  | 1.15E-06    |    |
| siR_10930  | 1.3825   | 0.1865  | -2.89003194 | 1.90E-07    | ** |
| siR_109301 | 4.1831   | 5.5941  | 0.41933356  | 0.017856414 |    |
| siR_109302 | 0.6381   | 2.0885  | 1.7106127   | 2.58E-06    | ** |
| siR_109323 | 11.1667  | 4.1769  | -1.41869839 | 2.15E-21    | ** |
| siR_109331 | 3.3677   | 2.0139  | -0.74177158 | 0.002226115 |    |
| siR_109333 | 1.5243   | 1.3799  | -0.14358315 | 0.661720724 |    |
| siR_109342 | 6.5937   | 3.6548  | -0.85129579 | 1.37E-06    |    |
| siR_109348 | 1.1344   | 0.2611  | -2.11925507 | 8.17E-05    | ** |
| siR_109355 | 1.7016   | 0.3356  | -2.34207732 | 2.45E-07    | ** |
| siR_109356 | 1.2053   | 0.1119  | -3.42911034 | 1.49E-07    | ** |
| siR_109384 | 1.3471   | 0.634   | -1.08730221 | 0.008088456 | ** |
| siR_109392 | 1.3116   | 1.8274  | 0.47846465  | 0.127465492 |    |
| siR_1094   | 3.0132   | 2.0512  | -0.55482827 | 0.025461424 |    |

|            |          |          |              |              |    |
|------------|----------|----------|--------------|--------------|----|
| siR_109403 | 0. 01    | 4. 699   | 8. 87620996  | 4. 51E-40    | ** |
| siR_109408 | 0. 01    | 2. 2003  | 7. 78155643  | 3. 72E-19    | ** |
| siR_109417 | 0. 01    | 1. 0069  | 6. 6537766   | 3. 63E-09    | ** |
| siR_109418 | 0. 01    | 48. 6685 | 12. 2487726  | 0            | ** |
| siR_109423 | 0. 01    | 4. 3634  | 8. 76930892  | 2. 91E-37    | ** |
| siR_109424 | 0. 01    | 1. 0442  | 6. 70625425  | 1. 77E-09    | ** |
| siR_109429 | 0. 01    | 13. 4258 | 10. 39079234 | 4. 02E-113   | ** |
| siR_109461 | 1. 2407  | 0. 8951  | -0. 47103354 | 0. 220381215 |    |
| siR_109480 | 2. 1624  | 0. 9323  | -1. 21376724 | 0. 000232275 | ** |
| siR_109494 | 2. 8005  | 1. 1561  | -1. 27641824 | 1. 27E-05    | ** |
| siR_109516 | 1. 2762  | 0. 1119  | -3. 5115725  | 4. 57E-08    | ** |
| siR_109527 | 1. 1344  | 0. 2238  | -2. 3416475  | 2. 83E-05    | ** |
| siR_109532 | 1. 5952  | 0. 2611  | -2. 61106295 | 1. 07E-07    | ** |
| siR_109545 | 7. 5508  | 2. 0139  | -1. 90663746 | 5. 58E-22    | ** |
| siR_109563 | 1. 2762  | 0. 1492  | -3. 096535   | 2. 35E-07    | ** |
| siR_109611 | 1. 9143  | 1. 6409  | -0. 22232962 | 0. 451801385 |    |
| siR_109614 | 0. 01    | 9. 5099  | 9. 89328636  | 2. 41E-80    | ** |
| siR_109620 | 0. 01    | 15. 1786 | 10. 56782301 | 8. 54E-128   | ** |
| siR_109636 | 1. 028   | 0. 3356  | -1. 61502564 | 0. 001825058 | ** |
| siR_109647 | 1. 418   | 0. 7832  | -0. 85640486 | 0. 025717571 |    |
| siR_109650 | 1. 2407  | 0. 6713  | -0. 88612477 | 0. 0320329   |    |
| siR_109652 | 1. 1344  | 0. 5594  | -1. 01997728 | 0. 02136103  | *  |
| siR_10967  | 1. 0989  | 0. 7832  | -0. 48860744 | 0. 233779461 |    |
| siR_109682 | 1. 0989  | 0. 2984  | -1. 88074067 | 0. 000335467 | ** |
| siR_109689 | 6. 2746  | 2. 3868  | -1. 39444581 | 2. 25E-12    | ** |
| siR_109695 | 24. 2832 | 1. 4172  | -4. 09884328 | 8. 66E-148   | ** |
| siR_109707 | 0. 01    | 1. 1561  | 6. 85312238  | 2. 05E-10    | ** |
| siR_109710 | 1. 1698  | 0. 7459  | -0. 64920776 | 0. 112106036 |    |
| siR_10972  | 3. 9704  | 2. 797   | -0. 50540411 | 0. 018308291 |    |
| siR_109724 | 0. 01    | 2. 8343  | 8. 14684866  | 1. 83E-24    | ** |
| siR_10974  | 2. 0206  | 1. 4918  | -0. 43772962 | 0. 141770285 |    |
| siR_109744 | 1. 5598  | 0. 5221  | -1. 57896299 | 0. 000143572 | ** |
| siR_109765 | 29. 5653 | 12. 6053 | -1. 22987446 | 1. 14E-43    | ** |
| siR_109785 | 1. 028   | 0. 1865  | -2. 46259273 | 4. 21E-05    | ** |
| siR_10980  | 9. 6778  | 4. 4753  | -1. 11269473 | 2. 63E-13    | ** |
| siR_109805 | 1. 3116  | 0. 5967  | -1. 13625012 | 0. 006797934 | ** |
| siR_109819 | 2. 1979  | 2. 0139  | -0. 1261337  | 0. 642153565 |    |
| siR_109824 | 5. 9201  | 3. 3564  | -0. 81870689 | 9. 66E-06    |    |
| siR_109836 | 1. 1698  | 0. 2238  | -2. 38597995 | 1. 70E-05    | ** |
| siR_109842 | 25. 9848 | 2. 4987  | -3. 37841835 | 1. 59E-135   | ** |
| siR_109843 | 2. 6233  | 0. 4102  | -2. 67698341 | 3. 66E-12    | ** |
| siR_109845 | 11. 344  | 2. 6106  | -2. 11947611 | 8. 64E-37    | ** |
| siR_109854 | 25. 7721 | 26. 6651 | 0. 04914264  | 0. 517432753 |    |
| siR_109858 | 41. 8664 | 42. 1794 | 0. 0107457   | 0. 857417651 |    |
| siR_109865 | 0. 01    | 45. 1629 | 12. 14092241 | 0            | ** |
| siR_109871 | 0. 01    | 33. 6018 | 11. 7143228  | 5. 18E-282   | ** |
| siR_109888 | 0. 01    | 1. 9766  | 7. 62687714  | 2. 78E-17    | ** |

|            |         |         |             |             |    |
|------------|---------|---------|-------------|-------------|----|
| siR_1099   | 0.01    | 2.3495  | 7.87620996  | 2.10E-20    | ** |
| siR_109907 | 1.9497  | 0.3356  | -2.53843753 | 6.67E-09    | ** |
| siR_109916 | 0.01    | 1.6782  | 7.39077085  | 8.72E-15    | ** |
| siR_109919 | 0.01    | 5.8924  | 9.20271156  | 4.62E-50    | ** |
| siR_109935 | 30.3806 | 9.2116  | -1.72162669 | 6.90E-73    | ** |
| siR_109949 | 0.7444  | 1.0815  | 0.5388837   | 0.192821699 |    |
| siR_10995  | 0.01    | 4.3261  | 8.7569232   | 5.97E-37    | ** |
| siR_109950 | 3.0841  | 1.0815  | -1.51181588 | 1.88E-07    | ** |
| siR_10996  | 0.01    | 2.4987  | 7.96503389  | 1.18E-21    | ** |
| siR_109968 | 0.01    | 2.797   | 8.12773644  | 3.76E-24    | ** |
| siR_10997  | 0.01    | 1.7528  | 7.45351758  | 2.07E-15    | ** |
| siR_109974 | 0.01    | 1.3426  | 7.06888574  | 5.63E-12    | ** |
| siR_109980 | 1.3471  | 1.0069  | -0.41993654 | 0.250464973 |    |
| siR_110052 | 5.991   | 2.1258  | -1.49479096 | 5.08E-13    | ** |
| siR_110085 | 2.1979  | 0.8205  | -1.42155051 | 2.77E-05    | ** |
| siR_110087 | 3.3323  | 1.1934  | -1.48144061 | 9.41E-08    | ** |
| siR_1101   | 4.9984  | 3.804   | -0.39394911 | 0.035223077 |    |
| siR_11010  | 2.9069  | 1.1188  | -1.37752928 | 2.40E-06    | ** |
| siR_110135 | 2.3751  | 1.2307  | -0.94850913 | 0.00157346  |    |
| siR_110165 | 0.01    | 2.8343  | 8.14684866  | 1.83E-24    | ** |
| siR_110169 | 1.9852  | 0.5594  | -1.8273322  | 1.89E-06    | ** |
| siR_110184 | 0.01    | 6.5637  | 9.35836549  | 1.11E-55    | ** |
| siR_11020  | 4.8566  | 1.268   | -1.93739192 | 6.19E-15    | ** |
| siR_110230 | 2.1624  | 1.5663  | -0.46527285 | 0.107729716 |    |
| siR_110274 | 6.4519  | 2.1258  | -1.60171821 | 3.13E-15    | ** |
| siR_110314 | 1.5952  | 0.2611  | -2.61106295 | 1.07E-07    | ** |
| siR_110367 | 1.2053  | 0.2984  | -2.01407284 | 8.31E-05    | ** |
| siR_110389 | 78.1317 | 33.1915 | -1.23509418 | 3.32E-113   | ** |
| siR_110392 | 2.5169  | 0.9323  | -1.43278173 | 6.28E-06    | ** |
| siR_110396 | 3.5095  | 1.268   | -1.46871076 | 5.19E-08    | ** |
| siR_110401 | 9.536   | 3.3564  | -1.50646958 | 4.48E-20    | ** |
| siR_110406 | 5.4947  | 1.4918  | -1.88098658 | 4.01E-16    | ** |
| siR_110414 | 2.7296  | 2.2003  | -0.31098931 | 0.214107382 |    |
| siR_110420 | 17.8313 | 9.137   | -0.96461943 | 9.83E-19    |    |
| siR_110431 | 5.0339  | 0.9696  | -2.37621495 | 1.66E-19    | ** |
| siR_110432 | 3.5804  | 0.7832  | -2.1926681  | 4.42E-13    | ** |
| siR_110437 | 31.515  | 10.3677 | -1.60394278 | 1.80E-68    | ** |
| siR_110438 | 2.9778  | 2.2003  | -0.43654662 | 0.074501109 |    |
| siR_110441 | 4.6085  | 1.0442  | -2.14189919 | 5.18E-16    | ** |
| siR_110448 | 2.8714  | 0.7086  | -2.01871095 | 8.05E-10    | ** |
| siR_110476 | 24.4959 | 5.0347  | -2.28256258 | 7.40E-85    | ** |
| siR_110487 | 3.0841  | 0.1492  | -4.3695301  | 9.67E-21    | ** |
| siR_11049  | 3.4386  | 2.797   | -0.29794105 | 0.180023111 |    |
| siR_110494 | 1.418   | 0.0746  | -4.24853809 | 5.72E-10    | ** |
| siR_110564 | 96.3884 | 40.6876 | -1.24427035 | 8.29E-141   | ** |
| siR_110565 | 15.5625 | 6.0043  | -1.37400587 | 6.75E-28    | ** |
| siR_110566 | 4.9275  | 2.3868  | -1.04577819 | 7.31E-07    | ** |

|            |          |          |             |             |    |
|------------|----------|----------|-------------|-------------|----|
| siR_110567 | 159.8793 | 40.9487  | -1.9650936  | 0           | ** |
| siR_110568 | 3.7222   | 0.8578   | -2.11744235 | 4.99E-13    | ** |
| siR_110573 | 8.6498   | 4.1396   | -1.0631754  | 2.72E-11    | ** |
| siR_110589 | 1.8079   | 0.7832   | -1.20686221 | 0.000820802 | ** |
| siR_110610 | 0.01     | 9.7337   | 9.9268445   | 3.23E-82    | ** |
| siR_110611 | 0.01     | 1.0069   | 6.6537766   | 3.63E-09    | ** |
| siR_11062  | 1.5952   | 0.3729   | -2.09687661 | 3.09E-06    | ** |
| siR_110622 | 1.3825   | 0.634    | -1.12472473 | 0.005814363 | ** |
| siR_110633 | 0.709    | 1.0069   | 0.50606288  | 0.235363115 |    |
| siR_110635 | 1.1698   | 0.8578   | -0.44754867 | 0.256675186 |    |
| siR_110637 | 1.5243   | 2.2749   | 0.57765626  | 0.043445592 |    |
| siR_110638 | 2.5169   | 3.2446   | 0.36639273  | 0.112000953 |    |
| siR_110657 | 1.3825   | 0.5967   | -1.2122018  | 0.003421985 | ** |
| siR_110664 | 0.01     | 1.7901   | 7.48389637  | 1.01E-15    | ** |
| siR_110705 | 0.01     | 38.6364  | 11.91574496 | 0           | ** |
| siR_110713 | 0.01     | 115.6483 | 13.49745644 | 0           | ** |
| siR_110714 | 0.01     | 2.7225   | 8.08878824  | 1.58E-23    | ** |
| siR_110722 | 0.01     | 48.5566  | 12.24545169 | 0           | ** |
| siR_110723 | 0.01     | 2.6479   | 8.04870483  | 6.67E-23    | ** |
| siR_110731 | 0.01     | 32.4457  | 11.66381158 | 2.47E-272   | ** |
| siR_11075  | 3.9704   | 3.0208   | -0.39435369 | 0.060547344 |    |
| siR_11077  | 1.5598   | 1.4918   | -0.06430692 | 0.842144431 |    |
| siR_11079  | 6.4164   | 4.6244   | -0.47249789 | 0.004731887 |    |
| siR_110791 | 5.8138   | 2.2003   | -1.4017812  | 1.20E-11    | ** |
| siR_110793 | 9.7487   | 3.6921   | -1.40076822 | 1.54E-18    | ** |
| siR_11085  | 0.01     | 1.6782   | 7.39077085  | 8.72E-15    | ** |
| siR_11088  | 1.5952   | 1.1934   | -0.41865963 | 0.21138519  |    |
| siR_110884 | 2.4106   | 0.634    | -1.92683753 | 4.98E-08    | ** |
| siR_11089  | 3.0132   | 1.1561   | -1.38203024 | 1.47E-06    | ** |
| siR_110982 | 12.4075  | 2.3495   | -2.40078678 | 1.96E-46    | ** |
| siR_110985 | 58.7406  | 3.431    | -4.09765697 | 0           | ** |
| siR_110986 | 3.0841   | 0.5221   | -2.56245148 | 1.77E-13    | ** |
| siR_110987 | 5.0693   | 0.4475   | -3.50182696 | 1.82E-28    | ** |
| siR_110988 | 1.2407   | 0.0746   | -4.05583487 | 1.27E-08    | ** |
| siR_110994 | 1.3116   | 0.7459   | -0.81427367 | 0.04007629  |    |
| siR_110999 | 1.8434   | 0.8951   | -1.04224838 | 0.002666955 | ** |
| siR_111000 | 1.5952   | 0.2984   | -2.41841787 | 3.60E-07    | ** |
| siR_111002 | 1.4534   | 0.4102   | -1.82503241 | 4.93E-05    | ** |
| siR_111005 | 5.1757   | 1.0069   | -2.36183359 | 6.98E-20    | ** |
| siR_111012 | 1.3825   | 0.2238   | -2.62699754 | 7.30E-07    | ** |
| siR_111027 | 5.5302   | 4.065    | -0.4440763  | 0.013294078 |    |
| siR_111030 | 2.446    | 2.1258   | -0.20241853 | 0.436028381 |    |
| siR_111036 | 1.7725   | 0.4475   | -1.98582604 | 1.99E-06    | ** |
| siR_111042 | 14.0382  | 11.8967  | -0.23879652 | 0.027646186 |    |
| siR_11106  | 19.5684  | 3.431    | -2.51182477 | 4.25E-76    | ** |
| siR_111064 | 0.5672   | 1.3799   | 1.28263428  | 0.002097694 | ** |
| siR_111071 | 13.5419  | 3.5056   | -1.94969688 | 2.69E-39    | ** |

|            |          |         |             |             |    |
|------------|----------|---------|-------------|-------------|----|
| siR_111088 | 0.01     | 1.268   | 6.98641094  | 2.37E-11    | ** |
| siR_111109 | 0.01     | 2.0512  | 7.68032436  | 6.59E-18    | ** |
| siR_111128 | 1.8788   | 0.3729  | -2.3329508  | 6.03E-08    | ** |
| siR_111130 | 6.4164   | 1.5663  | -2.03440352 | 1.90E-20    | ** |
| siR_111155 | 0.01     | 1.0069  | 6.6537766   | 3.63E-09    | ** |
| siR_111158 | 175.5836 | 54.4118 | -1.69016664 | 0           | ** |
| siR_111171 | 1.5952   | 0.2984  | -2.41841787 | 3.60E-07    | ** |
| siR_111177 | 0.01     | 3.9159  | 8.61320011  | 1.62E-33    | ** |
| siR_11118  | 0.01     | 1.7528  | 7.45351758  | 2.07E-15    | ** |
| siR_111180 | 0.01     | 3.7667  | 8.55715732  | 2.87E-32    | ** |
| siR_111196 | 1.028    | 0.8951  | -0.19971949 | 0.622135026 |    |
| siR_111197 | 2.3042   | 1.529   | -0.59167754 | 0.038771935 |    |
| siR_111199 | 0.9571   | 1.3053  | 0.44763985  | 0.226390695 |    |
| siR_111201 | 3.6868   | 0.7459  | -2.30531502 | 3.47E-14    | ** |
| siR_11121  | 57.1099  | 31.3268 | -0.86634345 | 2.21E-47    |    |
| siR_111211 | 0.01     | 6.1162  | 9.25649177  | 6.18E-52    | ** |
| siR_111214 | 0.01     | 1.6036  | 7.32517051  | 3.67E-14    | ** |
| siR_11122  | 1.6661   | 0.9696  | -0.78101339 | 0.025220231 |    |
| siR_111221 | 0.01     | 6.34    | 9.30833903  | 8.28E-54    | ** |
| siR_111234 | 16.5197  | 4.8855  | -1.75760936 | 1.52E-41    | ** |
| siR_111239 | 13.4001  | 3.3564  | -1.9972572  | 4.19E-40    | ** |
| siR_111248 | 2.7651   | 0.2984  | -3.21201222 | 4.96E-15    | ** |
| siR_111250 | 12.4784  | 4.5871  | -1.4437787  | 2.58E-24    | ** |
| siR_111252 | 1.2762   | 0.2611  | -2.28918008 | 1.13E-05    | ** |
| siR_111256 | 0.01     | 4.7363  | 8.88761665  | 2.20E-40    | ** |
| siR_111263 | 1.7016   | 0.2238  | -2.92661    | 5.36E-09    | ** |
| siR_111264 | 0.01     | 1.5663  | 7.29121675  | 7.54E-14    | ** |
| siR_111281 | 1.0635   | 0.2238  | -2.24853809 | 7.77E-05    | ** |
| siR_111282 | 6.3455   | 2.163   | -1.55270018 | 2.08E-14    | ** |
| siR_111283 | 1.0989   | 0.1119  | -3.29577817 | 8.66E-07    | ** |
| siR_111285 | 37.8251  | 5.967   | -2.66426621 | 2.68E-155   | ** |
| siR_11129  | 1.418    | 1.4918  | 0.0731966   | 0.81896673  |    |
| siR_111292 | 338.9725 | 44.0813 | -2.94292956 | 0           | ** |
| siR_111294 | 1.0635   | 0.1865  | -2.5115725  | 2.49E-05    | ** |
| siR_111300 | 0.01     | 9.7337  | 9.9268445   | 3.23E-82    | ** |
| siR_111307 | 0.01     | 1.0815  | 6.75688986  | 8.62E-10    | ** |
| siR_111314 | 2.3397   | 0.5967  | -1.97124588 | 5.00E-08    | ** |
| siR_111344 | 0.5317   | 1.0442  | 0.97371369  | 0.032467048 |    |
| siR_11135  | 1.2407   | 0.5594  | -1.14920216 | 0.007946935 | ** |
| siR_111352 | 1.1698   | 0.8578  | -0.44754867 | 0.256675186 |    |
| siR_111356 | 0.01     | 1.3799  | 7.10841991  | 2.74E-12    | ** |
| siR_111357 | 0.01     | 4.6617  | 8.86471235  | 9.25E-40    | ** |
| siR_111366 | 1.8434   | 1.0442  | -0.81997109 | 0.014012732 |    |
| siR_1114   | 3.6159   | 1.3426  | -1.42932523 | 6.09E-08    | ** |
| siR_111403 | 0.01     | 1.4918  | 7.22091032  | 3.17E-13    | ** |
| siR_111404 | 27.4028  | 7.0112  | -1.96659002 | 1.13E-78    | ** |
| siR_111415 | 2.0915   | 1.4545  | -0.5240147  | 0.077839011 |    |

|            |          |          |             |             |    |
|------------|----------|----------|-------------|-------------|----|
| siR_111425 | 2.6587   | 0.4102   | -2.6963216  | 2.15E-12    | ** |
| siR_11145  | 0.01     | 101.0664 | 13.30301583 | 0           | ** |
| siR_111450 | 1.0989   | 0.1119   | -3.29577817 | 8.66E-07    | ** |
| siR_111470 | 3.1905   | 1.4918   | -1.0967284  | 3.55E-05    | ** |
| siR_111475 | 3.5095   | 1.3053   | -1.42688408 | 9.92E-08    | ** |
| siR_111476 | 93.127   | 14.6565  | -2.66765888 | 0           | ** |
| siR_111500 | 1.3116   | 0.7086   | -0.88828444 | 0.027066419 |    |
| siR_111501 | 1.028    | 0.4475   | -1.19988068 | 0.012673013 | *  |
| siR_111522 | 0.01     | 3.0581   | 8.25649177  | 2.46E-26    | ** |
| siR_111523 | 0.01     | 2.9089   | 8.18432989  | 4.35E-25    | ** |
| siR_111542 | 1.3471   | 0.4102   | -1.71545755 | 0.000183816 | ** |
| siR_111556 | 0.709    | 1.8274   | 1.36593493  | 0.000195651 | ** |
| siR_111559 | 27.7219  | 6.6383   | -2.06214041 | 1.53E-84    | ** |
| siR_111560 | 2.1979   | 1.1188   | -0.97417359 | 0.00189078  |    |
| siR_111561 | 3.6868   | 0.7832   | -2.23491649 | 1.03E-13    | ** |
| siR_111595 | 0.7444   | 2.5733   | 1.7894697   | 6.90E-08    | ** |
| siR_111597 | 1.028    | 1.0815   | 0.0731934   | 0.844954568 |    |
| siR_1116   | 5.9201   | 0.8951   | -2.72550077 | 3.07E-26    | ** |
| siR_111601 | 3.4032   | 1.4918   | -1.18983781 | 5.12E-06    | ** |
| siR_111604 | 2.6587   | 0.8951   | -1.57060022 | 6.70E-07    | ** |
| siR_111617 | 1.3471   | 0.5594   | -1.26790479 | 0.002777337 | ** |
| siR_111625 | 4.963    | 0.8205   | -2.59663722 | 3.72E-21    | ** |
| siR_111627 | 2.3042   | 0.9696   | -1.24880434 | 0.000101264 | ** |
| siR_111640 | 1.737    | 1.529    | -0.18400935 | 0.551122187 |    |
| siR_111675 | 0.01     | 1.1934   | 6.89893387  | 9.98E-11    | ** |
| siR_111676 | 0.01     | 1.1561   | 6.85312238  | 2.05E-10    | ** |
| siR_111702 | 12.3366  | 1.8647   | -2.72592939 | 4.68E-53    | ** |
| siR_111713 | 0.01     | 1.4172   | 7.14689956  | 1.34E-12    | ** |
| siR_111718 | 9.217    | 4.4007   | -1.06656423 | 5.39E-12    | ** |
| siR_111720 | 62.6046  | 28.3806  | -1.14136358 | 1.38E-80    | ** |
| siR_111721 | 1.5243   | 0.5594   | -1.44619471 | 0.000426884 | ** |
| siR_111756 | 0.01     | 13.5377  | 10.40276694 | 4.65E-114   | ** |
| siR_111757 | 0.01     | 1.5663   | 7.29121675  | 7.54E-14    | ** |
| siR_111764 | 0.01     | 2.8716   | 8.16571099  | 8.93E-25    | ** |
| siR_111771 | 6.0974   | 2.2749   | -1.42239106 | 2.19E-12    | ** |
| siR_111774 | 2.1624   | 0.1865   | -3.53538588 | 5.92E-13    | ** |
| siR_111779 | 1.0635   | 0.2611   | -2.02614567 | 0.000213675 | ** |
| siR_111797 | 114.5388 | 51.5028  | -1.15311362 | 3.09E-148   | ** |
| siR_11181  | 1.737    | 0.3729   | -2.21973705 | 4.42E-07    | ** |
| siR_111823 | 2.5878   | 0.8578   | -1.5930129  | 7.32E-07    | ** |
| siR_111833 | 0.01     | 4.7736   | 8.89893387  | 1.07E-40    | ** |
| siR_111836 | 1.0635   | 0.2611   | -2.02614567 | 0.000213675 | ** |
| siR_11184  | 23.9287  | 2.6479   | -3.17582148 | 4.20E-118   | ** |
| siR_111882 | 1.9143   | 0.7832   | -1.28936427 | 0.000286776 | ** |
| siR_111886 | 4.1476   | 1.6036   | -1.37096244 | 1.86E-08    | ** |
| siR_111910 | 0.01     | 5.6687   | 9.14687411  | 3.45E-48    | ** |
| siR_111913 | 0.01     | 12.2697  | 10.26088426 | 1.91E-103   | ** |



|            |         |         |             |             |    |
|------------|---------|---------|-------------|-------------|----|
| siR_111918 | 0.01    | 4.6244  | 8.85312238  | 1.90E-39    | ** |
| siR_11192  | 5.4593  | 2.1258  | -1.36071011 | 1.34E-10    | ** |
| siR_111928 | 0.01    | 2.7225  | 8.08878824  | 1.58E-23    | ** |
| siR_111937 | 2.9423  | 0.7086  | -2.05390098 | 3.17E-10    | ** |
| siR_111964 | 9.1106  | 2.2749  | -2.00174294 | 7.58E-28    | ** |
| siR_111976 | 6.1328  | 0.634   | -3.27399116 | 2.89E-32    | ** |
| siR_111980 | 1.418   | 0.4102  | -1.78945814 | 7.68E-05    | ** |
| siR_111987 | 3.3677  | 1.3053  | -1.3673822  | 4.35E-07    | ** |
| siR_112000 | 0.01    | 1.268   | 6.98641094  | 2.37E-11    | ** |
| siR_112005 | 36.6907 | 12.0459 | -1.60687224 | 1.26E-79    | ** |
| siR_112015 | 2.7651  | 1.0442  | -1.40493359 | 3.04E-06    | ** |
| siR_112044 | 1.418   | 0.5967  | -1.24877985 | 0.002405224 | ** |
| siR_11206  | 1.3116  | 0.7832  | -0.74387514 | 0.057586901 |    |
| siR_112062 | 8.8979  | 4.9228  | -0.85398576 | 1.81E-08    |    |
| siR_112078 | 0.01    | 4.1769  | 8.70628879  | 1.06E-35    | ** |
| siR_112088 | 3.545   | 0.2984  | -3.57046619 | 1.30E-20    | ** |
| siR_1121   | 18.7885 | 5.2584  | -1.8371541  | 7.16E-50    | ** |
| siR_112140 | 2.127   | 0.4848  | -2.13335843 | 4.66E-08    | ** |
| siR_112170 | 0.01    | 1.4172  | 7.14689956  | 1.34E-12    | ** |
| siR_112194 | 1.6307  | 0.5221  | -1.64309333 | 6.28E-05    | ** |
| siR_112210 | 1.5598  | 0.2611  | -2.57868669 | 1.81E-07    | ** |
| siR_112230 | 1.2762  | 1.6036  | 0.32945988  | 0.31265992  |    |
| siR_112231 | 1.3471  | 0.7832  | -0.78240428 | 0.044337712 |    |
| siR_112268 | 2.6587  | 0.5967  | -2.15564331 | 7.20E-10    | ** |
| siR_112277 | 0.01    | 10.9644 | 10.09861115 | 1.61E-92    | ** |
| siR_112278 | 0.01    | 1.0815  | 6.75688986  | 8.62E-10    | ** |
| siR_112303 | 3.7577  | 0.6713  | -2.48482034 | 1.25E-15    | ** |
| siR_112313 | 3.0487  | 2.6106  | -0.22381277 | 0.337287263 |    |
| siR_112316 | 0.01    | 1.0069  | 6.6537766   | 3.63E-09    | ** |
| siR_112320 | 4.573   | 0.2238  | -4.35285898 | 4.21E-30    | ** |
| siR_11233  | 2.446   | 1.7155  | -0.51179528 | 0.061706105 |    |
| siR_112360 | 1.3471  | 0.6713  | -1.0048274  | 0.013015658 | *  |
| siR_112365 | 0.01    | 1.4918  | 7.22091032  | 3.17E-13    | ** |
| siR_112369 | 0.01    | 4.5126  | 8.81781509  | 1.64E-38    | ** |
| siR_112372 | 0.01    | 6.5264  | 9.3501436   | 2.28E-55    | ** |
| siR_112383 | 1.4889  | 0.3729  | -1.99738616 | 1.28E-05    | ** |
| siR_112386 | 7.7281  | 4.5871  | -0.7525314  | 2.55E-06    |    |
| siR_112390 | 0.01    | 2.3495  | 7.87620996  | 2.10E-20    | ** |
| siR_112428 | 1.2053  | 0.4475  | -1.42943269 | 0.001965568 | ** |
| siR_112434 | 2.836   | 1.4172  | -1.00081416 | 0.000300085 | ** |
| siR_11248  | 16.4488 | 13.0156 | -0.33774052 | 0.000916509 |    |
| siR_112504 | 3.6513  | 1.0442  | -1.80601215 | 1.19E-10    | ** |
| siR_112540 | 1.7725  | 0.5221  | -1.76338756 | 1.14E-05    | ** |
| siR_112586 | 1.0635  | 0.2984  | -1.83350059 | 0.000528454 | ** |
| siR_112614 | 1.4889  | 0.4475  | -1.73428727 | 7.26E-05    | ** |
| siR_112646 | 0.01    | 1.9766  | 7.62687714  | 2.78E-17    | ** |
| siR_11267  | 0.01    | 4.8109  | 8.910163    | 5.22E-41    | ** |

|            |         |         |             |             |    |
|------------|---------|---------|-------------|-------------|----|
| siR_112683 | 3.7931  | 2.3495  | -0.69102364 | 0.002272171 |    |
| siR_112745 | 1.2407  | 0.4102  | -1.59675492 | 0.000655154 | ** |
| siR_112752 | 1.2053  | 0.8578  | -0.49067906 | 0.210074901 |    |
| siR_11281  | 2.5169  | 0.2984  | -3.07632846 | 2.67E-13    | ** |
| siR_11282  | 56.6136 | 10.8525 | -2.38312124 | 5.94E-204   | ** |
| siR_11284  | 0.01    | 2.9089  | 8.18432989  | 4.35E-25    | ** |
| siR_11285  | 0.8862  | 1.6036  | 0.85561009  | 0.016982452 |    |
| siR_112853 | 0.01    | 15.1413 | 10.56427336 | 1.75E-127   | ** |
| siR_112854 | 0.01    | 3.5429  | 8.46878694  | 2.15E-30    | ** |
| siR_112855 | 0.01    | 2.8716  | 8.16571099  | 8.93E-25    | ** |
| siR_112857 | 0.01    | 7.6452  | 9.57841043  | 9.81E-65    | ** |
| siR_112858 | 0.01    | 5.4822  | 9.09861115  | 1.25E-46    | ** |
| siR_112859 | 0.01    | 2.163   | 7.75688986  | 7.63E-19    | ** |
| siR_11286  | 0.01    | 11.5238 | 10.17040081 | 3.35E-97    | ** |
| siR_112860 | 0.01    | 1.1188  | 6.80580835  | 4.20E-10    | ** |
| siR_112872 | 1.3825  | 0.4848  | -1.51181788 | 0.000534972 | ** |
| siR_112884 | 7.9408  | 2.2003  | -1.85158412 | 3.32E-22    | ** |
| siR_11291  | 0.01    | 1.3053  | 7.02823761  | 1.15E-11    | ** |
| siR_11293  | 0.01    | 4.1396  | 8.69334756  | 2.17E-35    | ** |
| siR_112943 | 0.01    | 1.6409  | 7.35834351  | 1.79E-14    | ** |
| siR_112952 | 1.2762  | 1.3426  | 0.07317511  | 0.827934456 |    |
| siR_112960 | 0.01    | 1.8274  | 7.51364865  | 4.92E-16    | ** |
| siR_112969 | 2.6587  | 4.2142  | 0.66453779  | 0.001806909 |    |
| siR_11300  | 1.028   | 0.6713  | -0.61481072 | 0.156712209 |    |
| siR_113024 | 0.01    | 1.4545  | 7.18437949  | 6.51E-13    | ** |
| siR_11303  | 0.01    | 3.8413  | 8.58545083  | 6.83E-33    | ** |
| siR_113049 | 1.7725  | 1.1934  | -0.57070795 | 0.079955194 |    |
| siR_113056 | 2.9778  | 1.3053  | -1.18986544 | 2.03E-05    | ** |
| siR_11308  | 0.01    | 1.3053  | 7.02823761  | 1.15E-11    | ** |
| siR_113089 | 2.3042  | 1.6409  | -0.48977862 | 0.081630348 |    |
| siR_113091 | 3.545   | 2.6106  | -0.4414042  | 0.049074477 |    |
| siR_113105 | 2.2333  | 1.7155  | -0.38054794 | 0.174778949 |    |
| siR_113106 | 0.709   | 1.0069  | 0.50606288  | 0.235363115 |    |
| siR_113160 | 12.5138 | 8.3165  | -0.58947155 | 1.38E-06    |    |
| siR_11318  | 4.5021  | 2.1258  | -1.08259223 | 1.13E-06    | ** |
| siR_113192 | 2.4106  | 0.8951  | -1.42927151 | 1.03E-05    | ** |
| siR_1132   | 1.8434  | 0.5594  | -1.720417   | 1.08E-05    | ** |
| siR_11320  | 1.0635  | 0.3356  | -1.66400541 | 0.001193189 | ** |
| siR_113221 | 0.01    | 1.7901  | 7.48389637  | 1.01E-15    | ** |
| siR_113227 | 0.01    | 2.4614  | 7.94333532  | 2.43E-21    | ** |
| siR_11323  | 58.1379 | 15.7007 | -1.88865008 | 2.78E-156   | ** |
| siR_113243 | 1.2407  | 0.3356  | -1.88633969 | 0.000130463 | ** |
| siR_113252 | 5.8492  | 1.6782  | -1.80132466 | 3.52E-16    | ** |
| siR_113272 | 2.8005  | 0.8205  | -1.77110919 | 2.76E-08    | ** |
| siR_11328  | 1.7016  | 0.2611  | -2.70421758 | 2.14E-08    | ** |
| siR_113292 | 0.01    | 2.2003  | 7.78155643  | 3.72E-19    | ** |
| siR_1133   | 1.4889  | 0.3729  | -1.99738616 | 1.28E-05    | ** |

|            |          |          |             |             |    |
|------------|----------|----------|-------------|-------------|----|
| siR_113320 | 1.1344   | 0.2238   | -2.3416475  | 2.83E-05    | ** |
| siR_113351 | 9.1815   | 22.712   | 1.30665298  | 2.12E-37    | ** |
| siR_113355 | 265.1657 | 83.6128  | -1.66509845 | 0           | ** |
| siR_113356 | 1.9852   | 1.4172   | -0.48624099 | 0.108760477 |    |
| siR_113357 | 1.5243   | 0.4475   | -1.76818728 | 4.70E-05    | ** |
| siR_113358 | 1.028    | 0.2984   | -1.78452082 | 0.000827671 | ** |
| siR_113361 | 27.6155  | 20.2506  | -0.44751359 | 2.33E-08    |    |
| siR_113365 | 0.01     | 8.6149   | 9.75069024  | 7.50E-73    | ** |
| siR_113370 | 0.01     | 1.8274   | 7.51364865  | 4.92E-16    | ** |
| siR_113415 | 4.963    | 49.6381  | 3.32216353  | 2.05E-257   | ** |
| siR_113419 | 44.0643  | 89.8782  | 1.02836094  | 7.14E-98    | ** |
| siR_11342  | 3.8995   | 3.7667   | -0.04998802 | 0.803754105 |    |
| siR_113424 | 26.8002  | 35.4292  | 0.40269512  | 9.08E-09    |    |
| siR_11343  | 1.5952   | 1.9766   | 0.30928363  | 0.290705553 |    |
| siR_113465 | 2.2333   | 0.5221   | -2.096779   | 3.01E-08    | ** |
| siR_113473 | 4.5021   | 1.529    | -1.5580097  | 1.13E-10    | ** |
| siR_113485 | 82.492   | 11.2255  | -2.87747451 | 0           | ** |
| siR_113486 | 4.1476   | 0.5221   | -2.9898787  | 1.53E-20    | ** |
| siR_113489 | 7.9408   | 1.6036   | -2.30797004 | 5.88E-29    | ** |
| siR_1135   | 1.9852   | 0.634    | -1.64672961 | 9.33E-06    | ** |
| siR_113502 | 0.01     | 2.0139   | 7.65384824  | 1.35E-17    | ** |
| siR_113516 | 1.418    | 0.7459   | -0.9268034  | 0.017122488 |    |
| siR_113517 | 0.01     | 6.8621   | 9.42250634  | 3.53E-58    | ** |
| siR_113518 | 0.01     | 1.7528   | 7.45351758  | 2.07E-15    | ** |
| siR_113520 | 4.4667   | 0.9323   | -2.26034319 | 1.56E-16    | ** |
| siR_113531 | 1.3825   | 1.4172   | 0.03576389  | 0.911214118 |    |
| siR_113534 | 15.1371  | 7.1977   | -1.07248096 | 6.55E-19    | ** |
| siR_113540 | 19.8165  | 5.3703   | -1.88362759 | 2.93E-54    | ** |
| siR_113542 | 1.6307   | 0.2238   | -2.86520945 | 1.63E-08    | ** |
| siR_113552 | 0.01     | 181.5092 | 14.14775505 | 0           | ** |
| siR_113586 | 1.4889   | 0.2611   | -2.5115725  | 5.19E-07    | ** |
| siR_113621 | 0.01     | 1.5663   | 7.29121675  | 7.54E-14    | ** |
| siR_113640 | 1.3825   | 1.7528   | 0.34238191  | 0.273740962 |    |
| siR_113641 | 0.8508   | 1.0442   | 0.29550613  | 0.462829197 |    |
| siR_113657 | 2.3751   | 1.7155   | -0.46935913 | 0.089020367 |    |
| siR_11366  | 1.9852   | 1.1934   | -0.73420668 | 0.020388005 |    |
| siR_113662 | 0.01     | 5.333    | 9.05880352  | 2.22E-45    | ** |
| siR_11369  | 4.7148   | 2.2003   | -1.09949633 | 4.53E-07    | ** |
| siR_113700 | 0.01     | 4.3261   | 8.7569232   | 5.97E-37    | ** |
| siR_11371  | 1.0635   | 0.8578   | -0.31010681 | 0.443941845 |    |
| siR_113753 | 0.01     | 1.7901   | 7.48389637  | 1.01E-15    | ** |
| siR_113762 | 2.3397   | 0.8951   | -1.38620278 | 2.18E-05    | ** |
| siR_113774 | 0.6026   | 1.0442   | 0.79312549  | 0.072046648 |    |
| siR_113788 | 4.9984   | 0.2984   | -4.06614692 | 2.23E-31    | ** |
| siR_113789 | 1.2053   | 0.0746   | -4.01407284 | 2.34E-08    | ** |
| siR_113833 | 1.9143   | 1.6409   | -0.22232962 | 0.451801385 |    |
| siR_113835 | 2.7651   | 2.0512   | -0.43086349 | 0.08962463  |    |

|            |         |         |             |             |    |
|------------|---------|---------|-------------|-------------|----|
| siR_113837 | 2.1624  | 2.9462  | 0.44622195  | 0.069021205 |    |
| siR_113850 | 0.6381  | 3.3937  | 2.4110046   | 5.55E-14    | ** |
| siR_113856 | 43.9579 | 18.6842 | -1.23430367 | 1.96E-64    | ** |
| siR_113870 | 1.6307  | 1.7155  | 0.07313773  | 0.806344282 |    |
| siR_113873 | 13.6128 | 3.8786  | -1.81135594 | 6.45E-36    | ** |
| siR_113897 | 1.6307  | 0.5594  | -1.54353923 | 0.00013028  | ** |
| siR_113898 | 2.3042  | 0.634   | -1.8617112  | 1.92E-07    | ** |
| siR_113918 | 2.6233  | 2.4987  | -0.0702051  | 0.775910255 |    |
| siR_11392  | 8.4725  | 3.431   | -1.30415861 | 8.92E-15    | ** |
| siR_113920 | 3.2968  | 1.6782  | -0.97415171 | 0.000136228 |    |
| siR_113923 | 3.9349  | 2.8343  | -0.4733345  | 0.026964621 |    |
| siR_113925 | 0.01    | 1.1188  | 6.80580835  | 4.20E-10    | ** |
| siR_113929 | 1.6307  | 0.2611  | -2.64281703 | 6.26E-08    | ** |
| siR_113931 | 1.5952  | 0.0373  | -5.41841788 | 2.11E-12    | ** |
| siR_113962 | 1.028   | 0.9696  | -0.08437866 | 0.833764704 |    |
| siR_113983 | 0.01    | 1.0069  | 6.6537766   | 3.63E-09    | ** |
| siR_113985 | 0.01    | 22.0407 | 11.10595433 | 3.09E-185   | ** |
| siR_113987 | 0.01    | 4.9601  | 8.9542254   | 2.94E-42    | ** |
| siR_114018 | 0.9926  | 1.0069  | 0.02063605  | 0.954446317 |    |
| siR_114046 | 0.01    | 2.3495  | 7.87620996  | 2.10E-20    | ** |
| siR_114067 | 41.9018 | 9.3981  | -2.1565712  | 3.27E-134   | ** |
| siR_114072 | 1.0989  | 0.4475  | -1.29610052 | 0.006143403 | ** |
| siR_114077 | 1.0635  | 0.8205  | -0.37424479 | 0.360625484 |    |
| siR_114126 | 5.7783  | 1.9766  | -1.54762416 | 3.43E-13    | ** |
| siR_114135 | 1.5598  | 0.2611  | -2.57868669 | 1.81E-07    | ** |
| siR_114156 | 3.2259  | 0.1119  | -4.84941978 | 6.70E-23    | ** |
| siR_114221 | 0.01    | 1.1934  | 6.89893387  | 9.98E-11    | ** |
| siR_114233 | 7.6926  | 1.2307  | -2.64399216 | 1.30E-32    | ** |
| siR_114264 | 1.0635  | 0.2611  | -2.02614567 | 0.000213675 | ** |
| siR_114276 | 0.01    | 6.3773  | 9.31680194  | 4.04E-54    | ** |
| siR_114277 | 0.01    | 1.1561  | 6.85312238  | 2.05E-10    | ** |
| siR_114282 | 0.01    | 5.8551  | 9.19355     | 9.47E-50    | ** |
| siR_114300 | 1.1344  | 0.3356  | -1.75711482 | 0.000500636 | ** |
| siR_114328 | 1.3825  | 1.2307  | -0.16780035 | 0.627937326 |    |
| siR_11434  | 3.3677  | 2.2376  | -0.58981147 | 0.01252401  |    |
| siR_114350 | 1.6307  | 0.4102  | -1.991092   | 5.04E-06    | ** |
| siR_114366 | 2.3397  | 0.634   | -1.88376881 | 1.23E-07    | ** |
| siR_114375 | 1.0635  | 0.1119  | -3.24853809 | 1.55E-06    | ** |
| siR_114382 | 1.2053  | 0.2984  | -2.01407284 | 8.31E-05    | ** |
| siR_114383 | 10.7768 | 1.6782  | -2.68294229 | 8.88E-46    | ** |
| siR_1144   | 0.01    | 1.3426  | 7.06888574  | 5.63E-12    | ** |
| siR_114401 | 3.1196  | 0.634   | -2.29880631 | 3.59E-12    | ** |
| siR_114408 | 9.1106  | 8.5403  | -0.09325932 | 0.478078749 |    |
| siR_114411 | 30.6288 | 13.7614 | -1.1542616  | 5.04E-41    | ** |
| siR_114415 | 14.9599 | 6.7129  | -1.15609248 | 6.55E-21    | ** |
| siR_114417 | 4.8566  | 2.0512  | -1.2434785  | 1.62E-08    | ** |
| siR_114423 | 1.5952  | 0.8205  | -0.95916208 | 0.00916911  |    |

|            |         |         |             |             |    |
|------------|---------|---------|-------------|-------------|----|
| siR_11443  | 0.01    | 1.3426  | 7.06888574  | 5.63E-12    | ** |
| siR_114431 | 0.01    | 15.8872 | 10.63364917 | 1.00E-133   | ** |
| siR_114454 | 15.7398 | 1.8274  | -3.10655284 | 1.19E-76    | ** |
| siR_114505 | 1.2762  | 0.4848  | -1.39639284 | 0.001733978 | ** |
| siR_114509 | 2.3042  | 2.5733  | 0.15935371  | 0.522703771 |    |
| siR_114515 | 8.2244  | 3.2446  | -1.3418698  | 5.79E-15    | ** |
| siR_114548 | 2.0561  | 0.1492  | -3.78459099 | 5.48E-13    | ** |
| siR_114553 | 1.0989  | 0.3729  | -1.5591994  | 0.001653799 | ** |
| siR_114561 | 1.5598  | 0.6713  | -1.21633151 | 0.00179751  | ** |
| siR_114568 | 5.7429  | 4.1396  | -0.47228807 | 0.007575351 |    |
| siR_114570 | 1.9852  | 0.4102  | -2.27488496 | 4.05E-08    | ** |
| siR_114591 | 1.1698  | 0.5221  | -1.16386383 | 0.009288174 | ** |
| siR_114609 | 3.5095  | 0.4848  | -2.8558039  | 7.47E-17    | ** |
| siR_114626 | 7.0191  | 1.4545  | -2.27076276 | 2.68E-25    | ** |
| siR_114688 | 5.2466  | 1.1188  | -2.22943064 | 7.02E-19    | ** |
| siR_114696 | 0.01    | 4.2142  | 8.71911497  | 5.16E-36    | ** |
| siR_114703 | 0.01    | 1.3799  | 7.10841991  | 2.74E-12    | ** |
| siR_114705 | 1.2407  | 1.3053  | 0.07322711  | 0.830255381 |    |
| siR_114722 | 2.446   | 2.6852  | 0.13460514  | 0.579404906 |    |
| siR_114726 | 4.7148  | 1.6036  | -1.55588225 | 4.30E-11    | ** |
| siR_114727 | 1.028   | 0.2238  | -2.19955832 | 0.000127871 | ** |
| siR_114731 | 6.0265  | 7.7571  | 0.36419703  | 0.014416807 |    |
| siR_114736 | 25.5949 | 15.4024 | -0.7327012  | 5.45E-17    |    |
| siR_114740 | 0.4254  | 1.1188  | 1.39506022  | 0.003209893 | ** |
| siR_114756 | 2.6233  | 2.1258  | -0.30337693 | 0.234271889 |    |
| siR_114842 | 1.418   | 0.2984  | -2.24853809 | 4.52E-06    | ** |
| siR_114856 | 5.2466  | 3.5056  | -0.58172141 | 0.002044897 |    |
| siR_114860 | 2.0915  | 1.4545  | -0.5240147  | 0.077839011 |    |
| siR_114861 | 0.01    | 1.0069  | 6.6537766   | 3.63E-09    | ** |
| siR_114871 | 3.1196  | 0.6713  | -2.21633151 | 1.05E-11    | ** |
| siR_114875 | 2.0915  | 0.3729  | -2.4876773  | 2.81E-09    | ** |
| siR_114884 | 11.5567 | 1.268   | -3.18810285 | 4.40E-58    | ** |
| siR_114890 | 27.261  | 8.6895  | -1.64949341 | 7.83E-62    | ** |
| siR_114891 | 22.9007 | 6.601   | -1.79463519 | 1.47E-58    | ** |
| siR_114934 | 0.01    | 4.1769  | 8.70628879  | 1.06E-35    | ** |
| siR_114935 | 0.01    | 2.3122  | 7.85312238  | 4.30E-20    | ** |
| siR_114954 | 2.9423  | 0.9696  | -1.60148275 | 1.12E-07    | ** |
| siR_114961 | 10.7413 | 1.9766  | -2.44207576 | 3.39E-41    | ** |
| siR_114962 | 1.9497  | 0.6713  | -1.53822261 | 2.90E-05    | ** |
| siR_114997 | 0.01    | 1.1561  | 6.85312238  | 2.05E-10    | ** |
| siR_11500  | 2.836   | 2.9462  | 0.05499784  | 0.808654666 |    |
| siR_11501  | 2.4815  | 1.1561  | -1.10194626 | 0.000257436 | ** |
| siR_115023 | 4.6439  | 1.4172  | -1.71229354 | 2.42E-12    | ** |
| siR_115039 | 0.01    | 7.1231  | 9.47636143  | 2.30E-60    | ** |
| siR_115041 | 1.3471  | 3.1327  | 1.21754967  | 7.67E-06    | ** |
| siR_115043 | 1.0635  | 1.0815  | 0.02421363  | 0.945573791 |    |
| siR_115059 | 0.01    | 1.7155  | 7.42248532  | 4.25E-15    | ** |

|            |          |          |             |             |    |
|------------|----------|----------|-------------|-------------|----|
| siR_115060 | 0.01     | 2.2003   | 7.78155643  | 3.72E-19    | ** |
| siR_115068 | 5.8847   | 1.268    | -2.21441412 | 7.69E-21    | ** |
| siR_11509  | 28.679   | 6.6383   | -2.11110899 | 5.12E-90    | ** |
| siR_115091 | 2.9778   | 1.268    | -1.23169211 | 1.19E-05    | ** |
| siR_11511  | 0.01     | 1.3426   | 7.06888574  | 5.63E-12    | ** |
| siR_115113 | 1.5598   | 0.1492   | -3.38604162 | 2.30E-09    | ** |
| siR_115158 | 0.01     | 2.9462   | 8.20271156  | 2.12E-25    | ** |
| siR_115172 | 9.6424   | 1.0442   | -3.20699421 | 5.61E-49    | ** |
| siR_115178 | 4.4312   | 0.9323   | -2.24883127 | 2.55E-16    | ** |
| siR_11520  | 1.7725   | 1.1934   | -0.57070795 | 0.079955194 |    |
| siR_115203 | 0.01     | 1.5663   | 7.29121675  | 7.54E-14    | ** |
| siR_115215 | 0.01     | 5.0347   | 8.97576201  | 6.99E-43    | ** |
| siR_115217 | 0.01     | 3.2073   | 8.32521549  | 1.38E-27    | ** |
| siR_115243 | 4.6794   | 3.0581   | -0.61368797 | 0.002258021 |    |
| siR_11526  | 0.01     | 1.4545   | 7.18437949  | 6.51E-13    | ** |
| siR_115279 | 3.155    | 1.5663   | -1.01027944 | 0.000120538 | ** |
| siR_115290 | 0.01     | 104.9076 | 13.35683158 | 0           | ** |
| siR_115296 | 148.8898 | 93.7195  | -0.66782376 | 1.71E-77    |    |
| siR_115303 | 3.4032   | 3.0954   | -0.13676609 | 0.529660152 |    |
| siR_115306 | 2.0561   | 2.3122   | 0.16935576  | 0.520314982 |    |
| siR_115311 | 1.9852   | 2.6106   | 0.39509706  | 0.126319119 |    |
| siR_11533  | 2.2688   | 1.2307   | -0.88245031 | 0.00365495  |    |
| siR_115331 | 0.01     | 12.4189  | 10.27832168 | 1.08E-104   | ** |
| siR_115332 | 0.01     | 1.0069   | 6.6537766   | 3.63E-09    | ** |
| siR_115337 | 0.01     | 2.9089   | 8.18432989  | 4.35E-25    | ** |
| siR_115350 | 0.01     | 1.4545   | 7.18437949  | 6.51E-13    | ** |
| siR_115359 | 0.01     | 1.3053   | 7.02823761  | 1.15E-11    | ** |
| siR_115360 | 1.7016   | 2.797    | 0.71698832  | 0.006634929 |    |
| siR_115489 | 0.01     | 1.4918   | 7.22091032  | 3.17E-13    | ** |
| siR_115495 | 2.836    | 1.4918   | -0.9268034  | 0.000694835 |    |
| siR_115505 | 1.0989   | 0.2238   | -2.29577817 | 4.70E-05    | ** |
| siR_115538 | 11.7694  | 7.5707   | -0.63654217 | 5.32E-07    |    |
| siR_115540 | 1.3825   | 0.5594   | -1.30532732 | 0.001931693 | ** |
| siR_115545 | 14.9953  | 6.8994   | -1.11996758 | 5.39E-20    | ** |
| siR_115563 | 1.7725   | 0.5221   | -1.76338756 | 1.14E-05    | ** |
| siR_115599 | 5.3175   | 1.3799   | -1.94618441 | 2.63E-16    | ** |
| siR_115603 | 0.01     | 2.2003   | 7.78155643  | 3.72E-19    | ** |
| siR_115612 | 1.418    | 0.6713   | -1.07882799 | 0.006897488 | ** |
| siR_115641 | 1.3471   | 0.5221   | -1.36745889 | 0.001524084 | ** |
| siR_11565  | 4.8921   | 3.2073   | -0.60909459 | 0.001920299 |    |
| siR_11566  | 1.1698   | 0.4475   | -1.38630231 | 0.002893159 | ** |
| siR_115725 | 20.1356  | 3.1327   | -2.68426994 | 3.62E-84    | ** |
| siR_115730 | 1.2053   | 0.1492   | -3.01407284 | 7.31E-07    | ** |
| siR_11574  | 0.01     | 2.5733   | 8.00747585  | 2.81E-22    | ** |
| siR_115758 | 4.8566   | 3.9159   | -0.31060274 | 0.096884014 |    |
| siR_115764 | 1.8434   | 0.3729   | -2.30550845 | 9.97E-08    | ** |
| siR_11577  | 2.9423   | 0.4475   | -2.71698477 | 1.11E-13    | ** |

|            |          |          |             |             |    |
|------------|----------|----------|-------------|-------------|----|
| siR_115780 | 0.01     | 1.7901   | 7.48389637  | 1.01E-15    | ** |
| siR_115781 | 0.01     | 5.5568   | 9.11811051  | 2.98E-47    | ** |
| siR_1158   | 0.01     | 1.1934   | 6.89893387  | 9.98E-11    | ** |
| siR_11580  | 1.1698   | 0.2984   | -1.97094245 | 0.000133017 | ** |
| siR_115800 | 2.127    | 0.5221   | -2.02642197 | 1.24E-07    | ** |
| siR_115802 | 3.6159   | 0.8578   | -2.07564156 | 2.06E-12    | ** |
| siR_115819 | 1.3116   | 0.1865   | -2.81408027 | 5.73E-07    | ** |
| siR_11583  | 1.4534   | 0.7086   | -1.03638844 | 0.008088782 | ** |
| siR_115830 | 1.0635   | 0.5967   | -0.83374235 | 0.060029399 |    |
| siR_115846 | 0.01     | 1.2307   | 6.94333532  | 4.86E-11    | ** |
| siR_115854 | 1.3116   | 0.3729   | -1.8144671  | 0.00012559  | ** |
| siR_115860 | 0.01     | 2.2749   | 7.82965932  | 8.83E-20    | ** |
| siR_115864 | 0.01     | 1.9766   | 7.62687714  | 2.78E-17    | ** |
| siR_115869 | 42.3981  | 25.6582  | -0.72457965 | 1.27E-26    |    |
| siR_115873 | 1.4889   | 0.5594   | -1.4122947  | 0.000627722 | ** |
| siR_115874 | 1.5598   | 0.5594   | -1.4794089  | 0.000288819 | ** |
| siR_115879 | 4.0767   | 1.4545   | -1.4868785  | 3.10E-09    | ** |
| siR_115881 | 1.1698   | 1.0069   | -0.21634148 | 0.569256367 |    |
| siR_115882 | 0.01     | 1.0815   | 6.75688986  | 8.62E-10    | ** |
| siR_115896 | 1.7725   | 0.7832   | -1.17833296 | 0.001154208 | ** |
| siR_115965 | 57.2162  | 20.1387  | -1.50645313 | 3.09E-112   | ** |
| siR_115966 | 1.4534   | 0.4848   | -1.58397021 | 0.000237648 | ** |
| siR_115995 | 9.7133   | 2.0512   | -2.24349335 | 6.05E-34    | ** |
| siR_11601  | 0.01     | 3.3937   | 8.40671523  | 3.81E-29    | ** |
| siR_116018 | 1.6307   | 1.1934   | -0.45041371 | 0.176306369 |    |
| siR_116020 | 9.3942   | 2.6479   | -1.82692167 | 1.50E-25    | ** |
| siR_116051 | 2.7651   | 1.3799   | -1.00276794 | 0.000350324 | ** |
| siR_116055 | 8.827    | 1.529    | -2.52933479 | 1.79E-35    | ** |
| siR_116068 | 1.9143   | 1.268    | -0.59426219 | 0.058982077 |    |
| siR_116099 | 1.1698   | 1.4172   | 0.27678148  | 0.421044889 |    |
| siR_116113 | 1.028    | 0.2984   | -1.78452082 | 0.000827671 | ** |
| siR_116142 | 5.5302   | 1.6782   | -1.720417   | 1.62E-14    | ** |
| siR_116145 | 3.4741   | 0.7459   | -2.21958515 | 6.65E-13    | ** |
| siR_116149 | 1.8079   | 1.7901   | -0.0142747  | 0.963590548 |    |
| siR_116150 | 3.864    | 2.0512   | -0.91362693 | 8.94E-05    |    |
| siR_116161 | 99.7916  | 12.8291  | -2.95949842 | 0           | ** |
| siR_116170 | 12.5493  | 0.8578   | -3.87082177 | 5.23E-74    | ** |
| siR_116173 | 17.5477  | 2.3122   | -2.92394385 | 2.25E-80    | ** |
| siR_116175 | 103.1948 | 110.6882 | 0.10113116  | 0.0071996   |    |
| siR_116179 | 482.8284 | 95.7334  | -2.33441628 | 0           | ** |
| siR_116182 | 5.6011   | 1.7901   | -1.64567    | 6.99E-14    | ** |
| siR_116189 | 1.2053   | 0.6713   | -0.84436273 | 0.042610765 |    |
| siR_116194 | 77.9544  | 28.8282  | -1.4351497  | 9.43E-142   | ** |
| siR_116195 | 3.3677   | 1.268    | -1.40920888 | 2.35E-07    | ** |
| siR_11620  | 3.0132   | 0.4102   | -2.87689704 | 9.38E-15    | ** |
| siR_116204 | 2.0561   | 8.9132   | 2.11603305  | 1.63E-29    | ** |
| siR_116209 | 0.01     | 9.9948   | 9.96503389  | 2.11E-84    | ** |

|            |          |         |             |             |    |
|------------|----------|---------|-------------|-------------|----|
| siR_116211 | 0.01     | 2.3122  | 7.85312238  | 4.30E-20    | ** |
| siR_116215 | 2.9069   | 1.3053  | -1.15510002 | 3.92E-05    | ** |
| siR_116216 | 2.3751   | 0.5967  | -1.99291058 | 3.15E-08    | ** |
| siR_116227 | 21.7663  | 1.6409  | -3.72953696 | 1.32E-123   | ** |
| siR_116247 | 4.1122   | 1.4545  | -1.49938714 | 2.11E-09    | ** |
| siR_116249 | 1.3825   | 0.634   | -1.12472473 | 0.005814363 | ** |
| siR_116253 | 2.0561   | 4.2888  | 1.06066361  | 2.71E-06    | ** |
| siR_116256 | 1.4889   | 1.1561  | -0.36498067 | 0.288568542 |    |
| siR_116271 | 1.2407   | 1.0815  | -0.19812065 | 0.590050383 |    |
| siR_116284 | 1.1698   | 0.634   | -0.88370715 | 0.037954945 |    |
| siR_116312 | 5.1757   | 1.3799  | -1.90719028 | 1.58E-15    | ** |
| siR_116328 | 2.0915   | 0.7459  | -1.48748387 | 2.36E-05    | ** |
| siR_116329 | 1.1344   | 0.8578  | -0.40321622 | 0.310894164 |    |
| siR_116417 | 1.0989   | 0.4848  | -1.1805985  | 0.010852128 | *  |
| siR_116419 | 2.4815   | 0.2984  | -3.05589301 | 4.70E-13    | ** |
| siR_116498 | 1.5243   | 0.3356  | -2.18333225 | 2.95E-06    | ** |
| siR_116504 | 3.4032   | 0.634   | -2.42433719 | 6.40E-14    | ** |
| siR_116513 | 1.028    | 0.4102  | -1.32544087 | 0.007079856 | ** |
| siR_116533 | 0.01     | 1.4918  | 7.22091032  | 3.17E-13    | ** |
| siR_11654  | 0.01     | 7.0858  | 9.46878694  | 4.73E-60    | ** |
| siR_116544 | 4.5021   | 0.6713  | -2.74556855 | 1.94E-20    | ** |
| siR_116561 | 1.3471   | 0.5967  | -1.17477927 | 0.004838592 | ** |
| siR_116563 | 4.3603   | 0.6713  | -2.69939785 | 1.66E-19    | ** |
| siR_116565 | 4.8566   | 4.9601  | 0.03042254  | 0.861236204 |    |
| siR_11663  | 0.01     | 84.4706 | 13.04423358 | 0           | ** |
| siR_116661 | 3.8995   | 1.0442  | -1.90089109 | 5.43E-12    | ** |
| siR_116665 | 1.1698   | 0.4475  | -1.38630231 | 0.002893159 | ** |
| siR_116669 | 1.5243   | 1.0815  | -0.4951132  | 0.154115399 |    |
| siR_116670 | 2.0915   | 0.9696  | -1.10907639 | 0.000756063 | ** |
| siR_116678 | 1.8788   | 1.3053  | -0.52543008 | 0.094161439 |    |
| siR_116708 | 158.8158 | 48.1091 | -1.72297273 | 0           | ** |
| siR_116709 | 3.1196   | 1.1561  | -1.43209486 | 4.81E-07    | ** |
| siR_116711 | 73.665   | 24.6512 | -1.57932145 | 3.99E-154   | ** |
| siR_116712 | 1.4534   | 0.4102  | -1.82503241 | 4.93E-05    | ** |
| siR_116732 | 1.2407   | 0.4102  | -1.59675492 | 0.000655154 | ** |
| siR_116745 | 0.01     | 2.0885  | 7.70632333  | 3.21E-18    | ** |
| siR_116750 | 0.01     | 1.0442  | 6.70625425  | 1.77E-09    | ** |
| siR_116785 | 2.3042   | 1.529   | -0.59167754 | 0.038771935 |    |
| siR_116787 | 3.2614   | 1.529   | -1.09290299 | 3.06E-05    | ** |
| siR_116788 | 0.7799   | 1.4545  | 0.89916224  | 0.017828696 |    |
| siR_116797 | 1.737    | 0.3729  | -2.21973705 | 4.42E-07    | ** |
| siR_116801 | 16.5197  | 6.3027  | -1.39014559 | 5.17E-30    | ** |
| siR_11681  | 3.545    | 1.6409  | -1.11129831 | 1.05E-05    | ** |
| siR_116811 | 1.418    | 0.9696  | -0.54839593 | 0.131795682 |    |
| siR_116814 | 1.5598   | 0.8951  | -0.80124028 | 0.026942588 |    |
| siR_116834 | 0.01     | 28.0823 | 11.45544538 | 8.26E-236   | ** |
| siR_116835 | 0.01     | 1.1561  | 6.85312238  | 2.05E-10    | ** |



|            |          |          |              |              |    |
|------------|----------|----------|--------------|--------------|----|
| siR_11684  | 1. 5598  | 1. 0069  | -0. 63144065 | 0. 072523267 |    |
| siR_116840 | 0. 01    | 29. 6859 | 11. 53556214 | 3. 11E-249   | ** |
| siR_116847 | 16. 7678 | 6. 4891  | -1. 36960311 | 8. 53E-30    | ** |
| siR_116850 | 21. 8726 | 14. 5819 | -0. 58494601 | 2. 26E-10    |    |
| siR_116854 | 27. 2256 | 19. 3928 | -0. 48944272 | 1. 73E-09    |    |
| siR_116880 | 19. 4975 | 11. 4119 | -0. 77275014 | 1. 93E-14    |    |
| siR_116883 | 0. 01    | 1. 3053  | 7. 02823761  | 1. 15E-11    | ** |
| siR_116918 | 3. 4032  | 1. 4172  | -1. 26384857 | 1. 74E-06    | ** |
| siR_116921 | 0. 01    | 1. 0069  | 6. 6537766   | 3. 63E-09    | ** |
| siR_116923 | 3. 0132  | 0. 9323  | -1. 69243026 | 2. 33E-08    | ** |
| siR_116941 | 3. 2968  | 0. 634   | -2. 37851162 | 2. 93E-13    | ** |
| siR_116969 | 1. 0635  | 0. 3356  | -1. 66400541 | 0. 001193189 | ** |
| siR_116980 | 0. 01    | 1. 3053  | 7. 02823761  | 1. 15E-11    | ** |
| siR_116983 | 0. 01    | 3. 6548  | 8. 51364865  | 2. 48E-31    | ** |
| siR_117013 | 0. 01    | 1. 3053  | 7. 02823761  | 1. 15E-11    | ** |
| siR_117033 | 1. 9852  | 0. 1119  | -4. 14900242 | 2. 42E-13    | ** |
| siR_117067 | 0. 01    | 4. 2888  | 8. 74443023  | 1. 22E-36    | ** |
| siR_117069 | 7. 3736  | 4. 4753  | -0. 72038476 | 9. 74E-06    |    |
| siR_117088 | 0. 01    | 1. 3799  | 7. 10841991  | 2. 74E-12    | ** |
| siR_117091 | 0. 01    | 1. 5663  | 7. 29121675  | 7. 54E-14    | ** |
| siR_117103 | 4. 3958  | 0. 7086  | -2. 63308238 | 3. 62E-19    | ** |
| siR_117105 | 2. 4106  | 1. 1561  | -1. 06012609 | 0. 000482579 | ** |
| siR_117122 | 5. 4947  | 3. 4683  | -0. 66381202 | 0. 000384683 |    |
| siR_117139 | 7. 1254  | 7. 869   | 0. 1432093   | 0. 31368458  |    |
| siR_117143 | 3. 545   | 4. 3634  | 0. 29966711  | 0. 126973263 |    |
| siR_117145 | 0. 01    | 1. 6036  | 7. 32517051  | 3. 67E-14    | ** |
| siR_117146 | 0. 01    | 1. 2307  | 6. 94333532  | 4. 86E-11    | ** |
| siR_117155 | 2. 9778  | 1. 6782  | -0. 8273322  | 0. 001590907 |    |
| siR_117157 | 1. 6307  | 0. 9323  | -0. 80662522 | 0. 022857287 |    |
| siR_117163 | 5. 3529  | 0. 7086  | -2. 91727733 | 1. 65E-25    | ** |
| siR_117164 | 1. 2762  | 0. 2984  | -2. 096535   | 3. 20E-05    | ** |
| siR_117167 | 4. 1122  | 0. 5967  | -2. 78483275 | 4. 75E-19    | ** |
| siR_117184 | 0. 01    | 10. 3677 | 10. 01788016 | 1. 59E-87    | ** |
| siR_117190 | 3. 6159  | 1. 6036  | -1. 17304046 | 3. 34E-06    | ** |
| siR_117224 | 0. 01    | 13. 5004 | 10. 39878644 | 9. 54E-114   | ** |
| siR_11724  | 13. 0101 | 3. 4683  | -1. 90733145 | 8. 98E-37    | ** |
| siR_117243 | 15. 598  | 1. 902   | -3. 0357719  | 2. 57E-74    | ** |
| siR_117246 | 5. 672   | 1. 0815  | -2. 39082387 | 6. 04E-22    | ** |
| siR_117247 | 1. 6307  | 0. 1119  | -3. 86520945 | 1. 12E-10    | ** |
| siR_117252 | 1. 2762  | 0. 1492  | -3. 096535   | 2. 35E-07    | ** |
| siR_117253 | 0. 01    | 2. 1258  | 7. 73186206  | 1. 57E-18    | ** |
| siR_117256 | 0. 01    | 1. 3799  | 7. 10841991  | 2. 74E-12    | ** |
| siR_117273 | 1. 2407  | 1. 9393  | 0. 64438168  | 0. 039974535 |    |
| siR_117275 | 2. 836   | 3. 1327  | 0. 14354909  | 0. 523861576 |    |
| siR_11729  | 1. 5243  | 0. 3729  | -2. 03128617 | 7. 99E-06    | ** |
| siR_117311 | 2. 5524  | 1. 0069  | -1. 34193403 | 1. 50E-05    | ** |
| siR_117313 | 1. 6307  | 0. 5221  | -1. 64309333 | 6. 28E-05    | ** |

|            |           |          |              |              |    |
|------------|-----------|----------|--------------|--------------|----|
| siR_117314 | 1. 7016   | 0. 3729  | -2. 19003124 | 7. 23E-07    | ** |
| siR_117341 | 0. 01     | 1. 268   | 6. 98641094  | 2. 37E-11    | ** |
| siR_117344 | 1. 4534   | 0. 2611  | -2. 47675745 | 8. 75E-07    | ** |
| siR_117360 | 0. 01     | 1. 9766  | 7. 62687714  | 2. 78E-17    | ** |
| siR_117361 | 0. 01     | 3. 1327  | 8. 29126281  | 5. 83E-27    | ** |
| siR_117365 | 0. 01     | 8. 2419  | 9. 68683315  | 9. 93E-70    | ** |
| siR_117370 | 1. 4889   | 0. 1119  | -3. 73396492 | 1. 26E-09    | ** |
| siR_117371 | 2. 127    | 0. 1865  | -3. 5115725  | 1. 07E-12    | ** |
| siR_117374 | 0. 01     | 1. 0069  | 6. 6537766   | 3. 63E-09    | ** |
| siR_117381 | 0. 01     | 5. 7805  | 9. 17505048  | 3. 99E-49    | ** |
| siR_117421 | 3. 7931   | 1. 3799  | -1. 45881369 | 1. 76E-08    | ** |
| siR_117422 | 2. 7651   | 0. 9696  | -1. 51187005 | 8. 22E-07    | ** |
| siR_117429 | 1. 3825   | 0. 634   | -1. 12472473 | 0. 005814363 | ** |
| siR_117431 | 1. 8788   | 0. 7459  | -1. 33275737 | 0. 000228382 | ** |
| siR_117433 | 0. 01     | 12. 1205 | 10. 2432335  | 3. 39E-102   | ** |
| siR_117451 | 0. 01     | 9. 2862  | 9. 85894454  | 1. 80E-78    | ** |
| siR_117453 | 0. 01     | 2. 4987  | 7. 96503389  | 1. 18E-21    | ** |
| siR_117456 | 7. 6217   | 1. 7155  | -2. 1514837  | 1. 13E-25    | ** |
| siR_117471 | 13. 8609  | 1. 2307  | -3. 4934699  | 3. 48E-75    | ** |
| siR_117485 | 195. 0102 | 41. 247  | -2. 24118849 | 0            | ** |
| siR_117486 | 3. 0132   | 2. 536   | -0. 24874169 | 0. 29105197  |    |
| siR_117487 | 2. 7651   | 1. 8274  | -0. 5975392  | 0. 022212355 |    |
| siR_117493 | 0. 01     | 1. 8647  | 7. 54279973  | 2. 40E-16    | ** |
| siR_117497 | 0. 01     | 7. 6079  | 9. 57135447  | 2. 01E-64    | ** |
| siR_117507 | 0. 01     | 1. 7528  | 7. 45351758  | 2. 07E-15    | ** |
| siR_117513 | 1. 8079   | 0. 634   | -1. 51176014 | 7. 12E-05    | ** |
| siR_117515 | 6. 7      | 2. 2003  | -1. 60646085 | 8. 03E-16    | ** |
| siR_11754  | 1. 0635   | 0. 2984  | -1. 83350059 | 0. 000528454 | ** |
| siR_117542 | 1. 4534   | 0. 4848  | -1. 58397021 | 0. 000237648 | ** |
| siR_117559 | 2. 8005   | 0. 8205  | -1. 77110919 | 2. 76E-08    | ** |
| siR_117592 | 5. 3884   | 1. 3799  | -1. 96529323 | 1. 06E-16    | ** |
| siR_117595 | 14. 5699  | 3. 3564  | -2. 11800441 | 9. 38E-47    | ** |
| siR_117597 | 6. 3101   | 0. 5967  | -3. 40258519 | 2. 85E-34    | ** |
| siR_117599 | 1. 028    | 0. 4848  | -1. 08437866 | 0. 021479092 | *  |
| siR_117656 | 1. 7725   | 0. 2611  | -2. 76311126 | 7. 25E-09    | ** |
| siR_117658 | 26. 6229  | 2. 9835  | -3. 15759005 | 1. 69E-130   | ** |
| siR_117661 | 4. 8921   | 1. 0069  | -2. 28053348 | 3. 73E-18    | ** |
| siR_117666 | 2. 0206   | 1. 6036  | -0. 33346943 | 0. 254622539 |    |
| siR_117667 | 2. 127    | 1. 5663  | -0. 44145947 | 0. 128630885 |    |
| siR_117671 | 5. 0693   | 4. 2515  | -0. 25381461 | 0. 161603394 |    |
| siR_117690 | 0. 01     | 1. 0442  | 6. 70625425  | 1. 77E-09    | ** |
| siR_117691 | 0. 01     | 1. 6782  | 7. 39077085  | 8. 72E-15    | ** |
| siR_117698 | 0. 01     | 5. 2957  | 9. 04867759  | 4. 56E-45    | ** |
| siR_117702 | 0. 01     | 2. 536   | 7. 98641094  | 5. 76E-22    | ** |
| siR_117749 | 1. 5243   | 1. 1188  | -0. 44619471 | 0. 195244239 |    |
| siR_117753 | 22. 2626  | 9. 6591  | -1. 20466142 | 2. 79E-32    | ** |
| siR_117758 | 6. 9482   | 10. 8152 | 0. 63834916  | 1. 36E-06    |    |

|            |          |          |             |               |    |
|------------|----------|----------|-------------|---------------|----|
| siR_117762 | 0.3899   | 2.3868   | 2.61390162  | 4.46E-11      | ** |
| siR_117763 | 0.709    | 2.2749   | 1.6819456   | 1.22E-06      | ** |
| siR_117770 | 0.01     | 2.4614   | 7.94333532  | 2.43E-21      | ** |
| siR_117802 | 4.1476   | 0.7459   | -2.47522263 | 4.84E-17      | ** |
| siR_117804 | 2.2333   | 0.3729   | -2.58231636 | 3.47E-10      | ** |
| siR_117809 | 1.3825   | 0.3356   | -2.04246486 | 2.03E-05      | ** |
| siR_117840 | 5.5302   | 2.8343   | -0.96433919 | 9.12E-07      |    |
| siR_117859 | 1.7016   | 0.9323   | -0.86802577 | 0.013287385   |    |
| siR_117864 | 5.2111   | 0.8205   | -2.6670127  | 9.22E-23      | ** |
| siR_117875 | 2.0206   | 0.4102   | -2.30038436 | 2.46E-08      | ** |
| siR_11788  | 2.7651   | 0.2984   | -3.21201222 | 4.96E-15      | ** |
| siR_117895 | 0.01     | 1.8274   | 7.51364865  | 4.92E-16      | ** |
| siR_117905 | 0.01     | 1.1561   | 6.85312238  | 2.05E-10      | ** |
| siR_117965 | 2.1979   | 0.5221   | -2.07372768 | 4.84E-08      | ** |
| siR_117974 | 3.0841   | 0.5221   | -2.56245148 | 1.77E-13      | ** |
| siR_118000 | 5.2111   | 1.2307   | -2.08210881 | 2.42E-17      | ** |
| siR_118013 | 0.01     | 37.182   | 11.86038866 | 859947785158e | ** |
| siR_118015 | 0.01     | 4.7736   | 8.89893387  | 1.07E-40      | ** |
| siR_118037 | 1.3471   | 0.5221   | -1.36745889 | 0.001524084   | ** |
| siR_118111 | 11.6276  | 4.8855   | -1.25097522 | 1.38E-18      | ** |
| siR_118118 | 0.01     | 1.9393   | 7.59939219  | 5.69E-17      | ** |
| siR_118123 | 1.4889   | 0.9696   | -0.61878526 | 0.085020625   |    |
| siR_118147 | 4.2894   | 1.3053   | -1.71639444 | 1.54E-11      | ** |
| siR_118151 | 0.01     | 5.2957   | 9.04867759  | 4.56E-45      | ** |
| siR_118158 | 0.01     | 2.0885   | 7.70632333  | 3.21E-18      | ** |
| siR_118171 | 11.2022  | 4.4753   | -1.32372579 | 1.82E-19      | ** |
| siR_118172 | 1.0635   | 0.3729   | -1.51195933 | 0.00248896    | ** |
| siR_118174 | 151.0523 | 40.8741  | -1.88578928 | 0             | ** |
| siR_118179 | 5.3529   | 1.3053   | -2.03593928 | 2.59E-17      | ** |
| siR_118180 | 1.0989   | 0.3729   | -1.5591994  | 0.001653799   | ** |
| siR_118204 | 0.01     | 1.7155   | 7.42248532  | 4.25E-15      | ** |
| siR_118207 | 2.3042   | 1.0815   | -1.09123228 | 0.000478906   | ** |
| siR_118212 | 0.01     | 15.8872  | 10.63364917 | 1.00E-133     | ** |
| siR_118224 | 0.01     | 100.5443 | 13.29554368 | 0             | ** |
| siR_118231 | 0.01     | 28.045   | 11.45352787 | 1.69E-235     | ** |
| siR_118232 | 0.01     | 1.9393   | 7.59939219  | 5.69E-17      | ** |
| siR_118239 | 0.01     | 27.7093  | 11.43615455 | 1.09E-232     | ** |
| siR_118254 | 0.01     | 1.0069   | 6.6537766   | 3.63E-09      | ** |
| siR_118270 | 1.9143   | 1.0442   | -0.87441888 | 0.00815689    |    |
| siR_118271 | 1.3825   | 0.8578   | -0.68856626 | 0.068256577   |    |
| siR_118287 | 0.9217   | 1.0815   | 0.23066451  | 0.554575008   |    |
| siR_118300 | 1.2407   | 0.3729   | -1.73429361 | 0.000303178   | ** |
| siR_118308 | 3.2968   | 0.8951   | -1.8809456  | 3.21E-10      | ** |
| siR_118321 | 2.2333   | 0.9696   | -1.20371546 | 0.000201232   | ** |
| siR_118323 | 4.5021   | 1.268    | -1.82804336 | 5.23E-13      | ** |
| siR_118324 | 2.2688   | 0.8951   | -1.34180866 | 4.55E-05      | ** |
| siR_118326 | 1.5952   | 0.8205   | -0.95916208 | 0.00916911    |    |

|            |          |          |             |             |    |
|------------|----------|----------|-------------|-------------|----|
| siR_118333 | 0.01     | 11.039   | 10.10839377 | 3.83E-93    | ** |
| siR_11834  | 1.8079   | 0.9323   | -0.95544871 | 0.005637862 |    |
| siR_118351 | 9.0043   | 7.6079   | -0.24311584 | 0.07298751  |    |
| siR_118354 | 5.2111   | 3.804    | -0.45407069 | 0.014172784 |    |
| siR_118374 | 2.3751   | 0.4475   | -2.40802867 | 4.90E-10    | ** |
| siR_118382 | 0.01     | 2.1258   | 7.73186206  | 1.57E-18    | ** |
| siR_118383 | 0.01     | 1.3799   | 7.10841991  | 2.74E-12    | ** |
| siR_118389 | 0.01     | 9.3235   | 9.86472783  | 8.79E-79    | ** |
| siR_118391 | 2.8714   | 1.7901   | -0.68171414 | 0.008782256 |    |
| siR_118406 | 2.4106   | 1.1934   | -1.0143146  | 0.000761628 | ** |
| siR_118409 | 4.6085   | 1.4172   | -1.70125388 | 3.68E-12    | ** |
| siR_118428 | 4.6794   | 2.0885   | -1.16385641 | 1.43E-07    | ** |
| siR_118438 | 1.0989   | 0.0373   | -4.88074067 | 1.72E-08    | ** |
| siR_118466 | 1.5243   | 0.5594   | -1.44619471 | 0.000426884 | ** |
| siR_118471 | 0.9571   | 1.0442   | 0.12565649  | 0.745938859 |    |
| siR_118474 | 9.1461   | 3.804    | -1.26563945 | 3.49E-15    | ** |
| siR_118510 | 107.1652 | 108.9354 | 0.02363636  | 0.527516803 |    |
| siR_118517 | 152.3639 | 67.2035  | -1.18091285 | 4.74E-204   | ** |
| siR_118518 | 3.2614   | 1.5663   | -1.05813083 | 4.89E-05    | ** |
| siR_118527 | 32.3304  | 32.4457  | 0.00513593  | 0.939500944 |    |
| siR_118528 | 1.028    | 0.8951   | -0.19971949 | 0.622135026 |    |
| siR_118535 | 3.3323   | 2.5733   | -0.37289863 | 0.102984565 |    |
| siR_118551 | 0.01     | 2.1258   | 7.73186206  | 1.57E-18    | ** |
| siR_118555 | 0.01     | 4.065    | 8.66711154  | 9.14E-35    | ** |
| siR_118567 | 0.01     | 2.9089   | 8.18432989  | 4.35E-25    | ** |
| siR_118568 | 0.01     | 1.529    | 7.2564446   | 1.55E-13    | ** |
| siR_118584 | 1.4889   | 1.1934   | -0.31916918 | 0.34968143  |    |
| siR_118600 | 0.01     | 1.6409   | 7.35834351  | 1.79E-14    | ** |
| siR_118668 | 0.01     | 15.0667  | 10.55714775 | 7.38E-127   | ** |
| siR_118669 | 0.01     | 1.0815   | 6.75688986  | 8.62E-10    | ** |
| siR_11869  | 0.01     | 1.1934   | 6.89893387  | 9.98E-11    | ** |
| siR_118695 | 2.836    | 1.5663   | -0.85649697 | 0.001509201 |    |
| siR_118703 | 1.0989   | 0.9696   | -0.1805985  | 0.64392648  |    |
| siR_118709 | 2.2333   | 1.0069   | -1.14925665 | 0.000339181 | ** |
| siR_118749 | 2.7651   | 1.1188   | -1.3053795  | 1.02E-05    | ** |
| siR_118773 | 9.2524   | 8.1674   | -0.17995075 | 0.173806378 |    |
| siR_118777 | 0.01     | 7.0485   | 9.46117246  | 9.70E-60    | ** |
| siR_118823 | 0.01     | 1.4172   | 7.14689956  | 1.34E-12    | ** |
| siR_118831 | 1.3116   | 0.634    | -1.04877306 | 0.011177638 | *  |
| siR_118843 | 0.01     | 3.5429   | 8.46878694  | 2.15E-30    | ** |
| siR_118879 | 0.01     | 2.0885   | 7.70632333  | 3.21E-18    | ** |
| siR_118893 | 0.01     | 2.7225   | 8.08878824  | 1.58E-23    | ** |
| siR_118913 | 2.0206   | 14.3208  | 2.82525643  | 1.51E-64    | ** |
| siR_118938 | 2.0915   | 0.7086   | -1.56149463 | 1.18E-05    | ** |
| siR_118957 | 0.01     | 1.3053   | 7.02823761  | 1.15E-11    | ** |
| siR_118965 | 2.5524   | 2.0885   | -0.2893873  | 0.262051286 |    |
| siR_118991 | 0.01     | 2.536    | 7.98641094  | 5.76E-22    | ** |

|            |          |           |              |              |    |
|------------|----------|-----------|--------------|--------------|----|
| siR_118992 | 0. 01    | 1. 8647   | 7. 54279973  | 2. 40E-16    | ** |
| siR_118993 | 1. 4889  | 1. 2307   | -0. 27476773 | 0. 417367564 |    |
| siR_118995 | 6. 9127  | 3. 9904   | -0. 79271595 | 3. 28E-06    |    |
| siR_119006 | 1. 2762  | 0. 1865   | -2. 7746069  | 9. 92E-07    | ** |
| siR_119019 | 3. 7931  | 0. 2238   | -4. 08309547 | 3. 49E-24    | ** |
| siR_119037 | 9. 4651  | 2. 0139   | -2. 2326257  | 6. 27E-33    | ** |
| siR_119048 | 1. 5598  | 1. 0815   | -0. 52832739 | 0. 126073008 |    |
| siR_119058 | 0. 01    | 1. 3053   | 7. 02823761  | 1. 15E-11    | ** |
| siR_119062 | 1. 5952  | 3. 0954   | 0. 95638854  | 0. 000257164 |    |
| siR_119063 | 0. 4254  | 1. 3799   | 1. 69767178  | 0. 000152693 | ** |
| siR_119068 | 0. 4608  | 1. 6782   | 1. 86470204  | 8. 01E-06    | ** |
| siR_119069 | 0. 4254  | 1. 1561   | 1. 44237425  | 0. 002120558 | ** |
| siR_119081 | 0. 01    | 1. 1188   | 6. 80580835  | 4. 20E-10    | ** |
| siR_11909  | 1. 0989  | 0. 3356   | -1. 71124549 | 0. 000775199 | ** |
| siR_119092 | 1. 6661  | 1. 0815   | -0. 62344133 | 0. 066287572 |    |
| siR_119108 | 1. 4889  | 0. 5967   | -1. 31916918 | 0. 001167472 | ** |
| siR_119177 | 1. 737   | 0. 3729   | -2. 21973705 | 4. 42E-07    | ** |
| siR_119200 | 5. 4593  | 1. 7155   | -1. 67008685 | 8. 02E-14    | ** |
| siR_119230 | 31. 4087 | 10. 405   | -1. 59388727 | 1. 21E-67    | ** |
| siR_119258 | 7. 3381  | 2. 163    | -1. 7623729  | 2. 21E-19    | ** |
| siR_119294 | 1. 9497  | 0. 9323   | -1. 06438598 | 0. 001667436 | ** |
| siR_119296 | 23. 9642 | 6. 8994   | -1. 79633797 | 2. 81E-61    | ** |
| siR_119299 | 2. 127   | 0. 7832   | -1. 44136736 | 3. 11E-05    | ** |
| siR_119310 | 0. 01    | 1. 7528   | 7. 45351758  | 2. 07E-15    | ** |
| siR_119313 | 0. 01    | 1. 1561   | 6. 85312238  | 2. 05E-10    | ** |
| siR_119337 | 2. 446   | 2. 3495   | -0. 05807064 | 0. 820285934 |    |
| siR_119338 | 470. 669 | 183. 2621 | -1. 36080438 | 0            | ** |
| siR_119344 | 2. 1624  | 1. 6409   | -0. 3981461  | 0. 163785525 |    |
| siR_119345 | 3. 5804  | 1. 3799   | -1. 37555705 | 1. 65E-07    | ** |
| siR_119380 | 2. 4815  | 1. 3053   | -0. 92683103 | 0. 001525068 |    |
| siR_119381 | 17. 5477 | 5. 7433   | -1. 61133012 | 3. 97E-39    | ** |
| siR_119384 | 6. 5582  | 3. 804    | -0. 78578265 | 6. 89E-06    |    |
| siR_119385 | 1. 5952  | 0. 1119   | -3. 83345537 | 2. 05E-10    | ** |
| siR_119395 | 3. 2259  | 2. 0512   | -0. 65323355 | 0. 007439742 |    |
| siR_119396 | 2. 3397  | 2. 1258   | -0. 13831769 | 0. 599362516 |    |
| siR_119411 | 1. 1344  | 0. 9696   | -0. 22646783 | 0. 558329007 |    |
| siR_119428 | 0. 01    | 1. 4545   | 7. 18437949  | 6. 51E-13    | ** |
| siR_119448 | 9. 0043  | 5. 333    | -0. 7556668  | 3. 44E-07    |    |
| siR_119466 | 1. 1344  | 0. 634    | -0. 83937469 | 0. 050540314 |    |
| siR_119475 | 1. 1698  | 1. 1188   | -0. 06430974 | 0. 864211392 |    |
| siR_1195   | 0. 01    | 124. 0767 | 13. 5989446  | 0            | ** |
| siR_11951  | 0. 01    | 2. 536    | 7. 98641094  | 5. 76E-22    | ** |
| siR_119546 | 1. 9497  | 1. 3426   | -0. 53822261 | 0. 081273721 |    |
| siR_119552 | 1. 2407  | 1. 3799   | 0. 1534094   | 0. 65186347  |    |
| siR_119555 | 0. 01    | 1. 6409   | 7. 35834351  | 1. 79E-14    | ** |
| siR_119571 | 6. 0265  | 1. 4918   | -2. 01426624 | 4. 58E-19    | ** |
| siR_119593 | 10. 245  | 8. 1301   | -0. 33357498 | 0. 009761244 |    |

|            |         |         |             |             |    |
|------------|---------|---------|-------------|-------------|----|
| siR_1196   | 0.01    | 1.3053  | 7.02823761  | 1.15E-11    | ** |
| siR_119600 | 1.7725  | 0.2611  | -2.76311126 | 7.25E-09    | ** |
| siR_119601 | 5.7783  | 0.5967  | -3.27556743 | 1.71E-30    | ** |
| siR_119612 | 4.8212  | 10.032  | 1.05714507  | 7.64E-13    | ** |
| siR_119615 | 91.1418 | 14.9921 | -2.60391038 | 0           | ** |
| siR_119617 | 2.446   | 0.1865  | -3.71317687 | 5.00E-15    | ** |
| siR_119619 | 11.8403 | 1.1934  | -3.31055605 | 1.58E-61    | ** |
| siR_119620 | 1.4889  | 0.5967  | -1.31916918 | 0.001167472 | ** |
| siR_119639 | 2.127   | 0.9696  | -1.13335843 | 0.000546583 | ** |
| siR_119642 | 40.9447 | 11.6357 | -1.81511871 | 6.70E-105   | ** |
| siR_119679 | 4.0767  | 1.7155  | -1.24877267 | 2.12E-07    | ** |
| siR_119680 | 4.0767  | 0.7832  | -2.37994912 | 4.34E-16    | ** |
| siR_11969  | 1.028   | 0.3356  | -1.61502564 | 0.001825058 | ** |
| siR_119723 | 0.01    | 2.4987  | 7.96503389  | 1.18E-21    | ** |
| siR_119765 | 2.1979  | 1.8647  | -0.23718221 | 0.390172168 |    |
| siR_119772 | 2.7651  | 0.5594  | -2.3053795  | 5.72E-11    | ** |
| siR_119779 | 1.2053  | 0.9323  | -0.37052611 | 0.334212439 |    |
| siR_11978  | 0.01    | 13.3512 | 10.3827537  | 1.69E-112   | ** |
| siR_119782 | 3.864   | 4.2142  | 0.12516369  | 0.517772668 |    |
| siR_119786 | 1.2053  | 0.0746  | -4.01407284 | 2.34E-08    | ** |
| siR_119792 | 1.9852  | 0.7086  | -1.48624099 | 3.88E-05    | ** |
| siR_119796 | 0.01    | 1.529   | 7.2564446   | 1.55E-13    | ** |
| siR_1198   | 0.01    | 1.1188  | 6.80580835  | 4.20E-10    | ** |
| siR_119823 | 1.8079  | 0.2611  | -2.79164052 | 4.20E-09    | ** |
| siR_119826 | 0.01    | 11.2255 | 10.13256399 | 1.05E-94    | ** |
| siR_119854 | 1.2053  | 1.2307  | 0.03008685  | 0.929320145 |    |
| siR_119867 | 0.9571  | 1.5663  | 0.71061899  | 0.044456183 |    |
| siR_11987  | 1.3116  | 0.9323  | -0.49246163 | 0.189152191 |    |
| siR_119908 | 4.6085  | 0.8951  | -2.36417648 | 7.06E-18    | ** |
| siR_11991  | 1.6661  | 0.1119  | -3.89619305 | 6.08E-11    | ** |
| siR_119911 | 2.9069  | 0.7459  | -1.96242731 | 1.29E-09    | ** |
| siR_119921 | 0.01    | 2.6106  | 8.02823761  | 1.37E-22    | ** |
| siR_119948 | 8.0826  | 2.0512  | -1.97835129 | 1.61E-24    | ** |
| siR_119952 | 2.9423  | 2.6479  | -0.15209571 | 0.517055765 |    |
| siR_119953 | 6.381   | 3.8413  | -0.73218789 | 3.02E-05    |    |
| siR_119954 | 2.7296  | 2.536   | -0.10613481 | 0.661434861 |    |
| siR_119955 | 4.4312  | 4.1396  | -0.09820607 | 0.603900072 |    |
| siR_119957 | 6.5228  | 5.1466  | -0.34187173 | 0.03502018  |    |
| siR_119973 | 5.0693  | 0.4102  | -3.62738715 | 2.85E-29    | ** |
| siR_119977 | 4.9275  | 3.2446  | -0.60281524 | 0.002035906 |    |
| siR_11998  | 2.7296  | 0.8951  | -1.60856878 | 2.99E-07    | ** |
| siR_119987 | 4.0767  | 1.0069  | -2.01748138 | 2.24E-13    | ** |
| siR_119990 | 6.2037  | 2.3122  | -1.42386273 | 1.35E-12    | ** |
| siR_120002 | 4.3249  | 3.9159  | -0.14332285 | 0.457499888 |    |
| siR_120032 | 0.01    | 2.2749  | 7.82965932  | 8.83E-20    | ** |
| siR_120052 | 2.1979  | 1.7901  | -0.29608557 | 0.288099086 |    |
| siR_120054 | 2.7651  | 3.5056  | 0.34232973  | 0.121021669 |    |

|            |           |           |             |             |    |
|------------|-----------|-----------|-------------|-------------|----|
| siR_120055 | 11.0249   | 12.4562   | 0.17609844  | 0.121263129 |    |
| siR_120066 | 1.0989    | 0.2238    | -2.29577817 | 4.70E-05    | ** |
| siR_120074 | 2.7296    | 0.9696    | -1.49322795 | 1.21E-06    | ** |
| siR_120098 | 6.0265    | 2.3122    | -1.38205418 | 8.45E-12    | ** |
| siR_1201   | 2.7651    | 2.4614    | -0.16785253 | 0.489592175 |    |
| siR_120110 | 2.0915    | 2.7597    | 0.39997345  | 0.111806098 |    |
| siR_120120 | 4.254     | 1.0442    | -2.02642197 | 5.72E-14    | ** |
| siR_120122 | 4.1476    | 0.5967    | -2.79719908 | 2.76E-19    | ** |
| siR_120150 | 33.7484   | 26.5532   | -0.34593337 | 1.18E-06    |    |
| siR_120162 | 1.3116    | 0.2984    | -2.13600837 | 1.97E-05    | ** |
| siR_120187 | 2.4106    | 2.6852    | 0.15563727  | 0.523308517 |    |
| siR_120189 | 0.4608    | 1.2307    | 1.41726651  | 0.001741998 | ** |
| siR_120217 | 13.0456   | 1.0069    | -3.69557099 | 3.51E-74    | ** |
| siR_120221 | 12.4429   | 0.7832    | -3.98979819 | 4.85E-75    | ** |
| siR_120232 | 0.2481    | 1.0069    | 2.02092677  | 0.000291037 | ** |
| siR_120252 | 1.3116    | 0.1119    | -3.55104587 | 2.52E-08    | ** |
| siR_120269 | 0.01      | 51.0553   | 12.31784502 | 0           | ** |
| siR_120270 | 0.01      | 3.0581    | 8.25649177  | 2.46E-26    | ** |
| siR_120275 | 0.01      | 97.971    | 13.25813905 | 0           | ** |
| siR_120286 | 0.01      | 25.509    | 11.31679063 | 2.87E-214   | ** |
| siR_120302 | 2.2688    | 0.5594    | -2.01997728 | 4.96E-08    | ** |
| siR_120317 | 0.01      | 2250.9459 | 17.78017186 | 0           | ** |
| siR_120318 | 0.01      | 2.6852    | 8.06888574  | 3.25E-23    | ** |
| siR_120319 | 0.01      | 1.529     | 7.2564446   | 1.55E-13    | ** |
| siR_120325 | 1707.7661 | 1767.1326 | 0.04929991  | 1.28E-07    |    |
| siR_120326 | 2.5524    | 4.4007    | 0.78587859  | 0.000221898 |    |
| siR_120327 | 1.737     | 1.529     | -0.18400935 | 0.551122187 |    |
| siR_120328 | 1.6661    | 1.0815    | -0.62344133 | 0.066287572 |    |
| siR_120341 | 1.2407    | 0.2611    | -2.24847995 | 1.86E-05    | ** |
| siR_12036  | 0.01      | 7.0485    | 9.46117246  | 9.70E-60    | ** |
| siR_12038  | 0.01      | 1.6409    | 7.35834351  | 1.79E-14    | ** |
| siR_120392 | 1.1344    | 0.0746    | -3.92661    | 7.99E-08    | ** |
| siR_120403 | 1.5598    | 1.2307    | -0.34188193 | 0.306763052 |    |
| siR_120409 | 1.5243    | 1.3426    | -0.18311732 | 0.578885383 |    |
| siR_120412 | 14.1091   | 9.7337    | -0.53556575 | 2.57E-06    |    |
| siR_120414 | 3.0841    | 4.8109    | 0.64145727  | 0.0012296   |    |
| siR_12042  | 0.01      | 4.4753    | 8.80584059  | 3.37E-38    | ** |
| siR_120440 | 11.7339   | 5.2957    | -1.1477893  | 1.49E-16    | ** |
| siR_120441 | 2.6233    | 1.0815    | -1.27834914 | 2.36E-05    | ** |
| siR_120454 | 1.7725    | 0.0373    | -5.57046618 | 8.23E-14    | ** |
| siR_120455 | 1.7725    | 0.1119    | -3.98550369 | 9.72E-12    | ** |
| siR_120456 | 3.3323    | 0.2238    | -3.89623635 | 9.88E-21    | ** |
| siR_120473 | 1.2762    | 0.7459    | -0.77480031 | 0.052442918 |    |
| siR_120484 | 1.9143    | 0.4475    | -2.09685735 | 3.03E-07    | ** |
| siR_120485 | 1.5952    | 0.2238    | -2.83345537 | 2.82E-08    | ** |
| siR_120486 | 1.737     | 0.0746    | -4.54127831 | 2.04E-12    | ** |
| siR_120489 | 0.01      | 1.4545    | 7.18437949  | 6.51E-13    | ** |

|            |          |         |             |             |    |
|------------|----------|---------|-------------|-------------|----|
| siR_120491 | 5.3529   | 1.3426  | -1.99529115 | 6.65E-17    | ** |
| siR_1205   | 1.2053   | 1.0442  | -0.20699422 | 0.579823032 |    |
| siR_120514 | 0.01     | 1.8274  | 7.51364865  | 4.92E-16    | ** |
| siR_120515 | 0.01     | 1.3426  | 7.06888574  | 5.63E-12    | ** |
| siR_120516 | 0.01     | 3.3192  | 8.37469175  | 1.60E-28    | ** |
| siR_120528 | 0.01     | 6.3773  | 9.31680194  | 4.04E-54    | ** |
| siR_120529 | 0.01     | 1.7155  | 7.42248532  | 4.25E-15    | ** |
| siR_120542 | 0.01     | 29.4994 | 11.5264699  | 1.13E-247   | ** |
| siR_120544 | 0.01     | 10.5542 | 10.04360151 | 4.38E-89    | ** |
| siR_120548 | 0.01     | 2.1258  | 7.73186206  | 1.57E-18    | ** |
| siR_120558 | 3.3677   | 2.2376  | -0.58981147 | 0.01252401  |    |
| siR_120582 | 9.1815   | 6.7875  | -0.43584958 | 0.00169271  |    |
| siR_120584 | 26.1621  | 10.3304 | -1.34058223 | 3.75E-44    | ** |
| siR_120593 | 0.01     | 1.0815  | 6.75688986  | 8.62E-10    | ** |
| siR_120639 | 7.0191   | 4.3261  | -0.69821904 | 2.69E-05    |    |
| siR_120642 | 45.8368  | 38.9721 | -0.23406466 | 9.32E-05    |    |
| siR_120650 | 1517.967 | 804.466 | -0.91603707 | 0           |    |
| siR_120651 | 19.1075  | 9.4726  | -1.01230666 | 1.71E-21    | ** |
| siR_120676 | 4.7148   | 2.4987  | -0.91601888 | 1.42E-05    |    |
| siR_120678 | 13.2937  | 7.7198  | -0.78410733 | 1.57E-10    |    |
| siR_120681 | 0.01     | 15.4024 | 10.58893945 | 1.14E-129   | ** |
| siR_120683 | 0.01     | 9.3608  | 9.87048802  | 4.28E-79    | ** |
| siR_120689 | 0.01     | 7.0112  | 9.45351758  | 1.99E-59    | ** |
| siR_120696 | 0.01     | 6.3773  | 9.31680194  | 4.04E-54    | ** |
| siR_1207   | 1.1344   | 1.6782  | 0.56498522  | 0.089513262 |    |
| siR_120788 | 2.5169   | 0.5967  | -2.07657022 | 4.86E-09    | ** |
| siR_120797 | 0.2481   | 1.6409  | 2.72549368  | 2.60E-08    | ** |
| siR_120802 | 4.0058   | 3.431   | -0.22346127 | 0.27137802  |    |
| siR_120806 | 2.6587   | 0.7086  | -1.90767763 | 1.25E-08    | ** |
| siR_120816 | 1.2407   | 0.3729  | -1.73429361 | 0.000303178 | ** |
| siR_120826 | 0.01     | 6.9367  | 9.43810568  | 8.38E-59    | ** |
| siR_120833 | 3.0841   | 0.634   | -2.2822948  | 5.89E-12    | ** |
| siR_120879 | 2.4106   | 1.7901  | -0.4293521  | 0.114527218 |    |
| siR_120888 | 3.1905   | 1.4172  | -1.17073916 | 1.32E-05    | ** |
| siR_120889 | 0.01     | 2.3495  | 7.87620996  | 2.10E-20    | ** |
| siR_120892 | 0.01     | 9.9202  | 9.9542254   | 8.89E-84    | ** |
| siR_120920 | 0.01     | 1.9766  | 7.62687714  | 2.78E-17    | ** |
| siR_120923 | 1.3116   | 0.4848  | -1.4358662  | 0.001178471 | ** |
| siR_120926 | 1.1344   | 0.5594  | -1.01997728 | 0.02136103  | *  |
| siR_120927 | 2.836    | 1.0442  | -1.44145947 | 1.43E-06    | ** |
| siR_120957 | 1.4889   | 0.8205  | -0.85967162 | 0.021777219 |    |
| siR_120961 | 1.7725   | 2.3122  | 0.38348057  | 0.161817356 |    |
| siR_120975 | 2.7651   | 0.8205  | -1.75275642 | 4.24E-08    | ** |
| siR_121    | 2.2688   | 0.3356  | -2.75711482 | 5.50E-11    | ** |
| siR_121027 | 1.3471   | 0.8951  | -0.58973618 | 0.116948474 |    |
| siR_121039 | 0.01     | 1.3426  | 7.06888574  | 5.63E-12    | ** |
| siR_121041 | 491.0882 | 159.021 | -1.62676486 | 0           | ** |



|            |          |         |             |               |    |
|------------|----------|---------|-------------|---------------|----|
| siR_121042 | 6.1683   | 1.8274  | -1.75508047 | 1.94E-16      | ** |
| siR_121050 | 2.4106   | 0.3729  | -2.69253158 | 2.43E-11      | ** |
| siR_121059 | 7.1254   | 1.1561  | -2.62370481 | 4.49E-30      | ** |
| siR_121062 | 2.5169   | 1.1188  | -1.16969574 | 0.000112756   | ** |
| siR_121070 | 2.4106   | 1.8647  | -0.37044874 | 0.168966986   |    |
| siR_121075 | 26.8002  | 10.4796 | -1.35466012 | 6.88E-46      | ** |
| siR_121089 | 0.01     | 1.902   | 7.57137344  | 1.17E-16      | ** |
| siR_121093 | 0.01     | 1.1561  | 6.85312238  | 2.05E-10      | ** |
| siR_121106 | 0.01     | 5.0347  | 8.97576201  | 6.99E-43      | ** |
| siR_121111 | 15.8816  | 6.1162  | -1.37664878 | 1.63E-28      | ** |
| siR_121112 | 11.2022  | 3.9531  | -1.50272574 | 3.09E-23      | ** |
| siR_121163 | 0.01     | 1.2307  | 6.94333532  | 4.86E-11      | ** |
| siR_121186 | 2.0915   | 1.1561  | -0.8552718  | 0.006607868   |    |
| siR_121119 | 1.8788   | 1.5663  | -0.26245093 | 0.382003897   |    |
| siR_121195 | 0.01     | 14.9921 | 10.54998677 | 3.11E-126     | ** |
| siR_121198 | 0.01     | 16.2228 | 10.66380713 | 1.55E-136     | ** |
| siR_121207 | 0.01     | 1.1934  | 6.89893387  | 9.98E-11      | ** |
| siR_121208 | 0.01     | 1.7155  | 7.42248532  | 4.25E-15      | ** |
| siR_121233 | 2.8714   | 1.1934  | -1.26667664 | 1.11E-05      | ** |
| siR_121236 | 14.5699  | 4.065   | -1.84166372 | 3.60E-39      | ** |
| siR_121237 | 1.5598   | 0.7459  | -1.06430692 | 0.005019683   | ** |
| siR_121238 | 1.1344   | 0.3729  | -1.60506874 | 0.001091833   | ** |
| siR_121285 | 6.0619   | 4.1396  | -0.55027868 | 0.001610018   |    |
| siR_121287 | 142.9697 | 45.0883 | -1.6648844  | 302496390164e | ** |
| siR_121293 | 0.01     | 3.1327  | 8.29126281  | 5.83E-27      | ** |
| siR_121294 | 0.01     | 2.0885  | 7.70632333  | 3.21E-18      | ** |
| siR_121296 | 0.01     | 1.8274  | 7.51364865  | 4.92E-16      | ** |
| siR_121344 | 2.5169   | 1.902   | -0.40413065 | 0.127237849   |    |
| siR_121345 | 3.155    | 1.8647  | -0.75869646 | 0.002547316   |    |
| siR_121354 | 3.545    | 0.5594  | -2.66383347 | 6.67E-16      | ** |
| siR_121356 | 8.7561   | 0.8205  | -3.41571319 | 3.74E-47      | ** |
| siR_121357 | 9.8905   | 1.1561  | -3.09677726 | 1.32E-48      | ** |
| siR_121385 | 3.3677   | 5.4076  | 0.68322481  | 0.000289956   |    |
| siR_121411 | 1.028    | 1.6036  | 0.64147406  | 0.063096194   |    |
| siR_121418 | 1.3116   | 0.9323  | -0.49246163 | 0.189152191   |    |
| siR_121419 | 8.8625   | 2.4241  | -1.87026451 | 6.36E-25      | ** |
| siR_12142  | 28.5372  | 11.8967 | -1.26228235 | 6.80E-44      | ** |
| siR_121423 | 12.6202  | 3.6548  | -1.78787041 | 7.54E-33      | ** |
| siR_121446 | 1.1698   | 0.5221  | -1.16386383 | 0.009288174   | ** |
| siR_121450 | 3.0487   | 3.7667  | 0.30510694  | 0.149294791   |    |
| siR_12148  | 5.6365   | 4.2515  | -0.40682766 | 0.021169734   |    |
| siR_121514 | 0.01     | 6.5637  | 9.35836549  | 1.11E-55      | ** |
| siR_121519 | 0.01     | 1.9393  | 7.59939219  | 5.69E-17      | ** |
| siR_121547 | 8.2244   | 5.2957  | -0.63508904 | 2.91E-05      |    |
| siR_121550 | 5.2111   | 3.4683  | -0.58735925 | 0.001935735   |    |
| siR_121555 | 0.01     | 1.1561  | 6.85312238  | 2.05E-10      | ** |
| siR_121556 | 77.4936  | 25.4344 | -1.60729611 | 3.72E-166     | ** |

|            |         |         |             |             |    |
|------------|---------|---------|-------------|-------------|----|
| siR_121559 | 19.1075 | 12.4934 | -0.61297288 | 6.36E-10    |    |
| siR_121563 | 1.7016  | 0.6713  | -1.34186239 | 0.000428491 | ** |
| siR_121566 | 0.01    | 21.5931 | 11.07635466 | 1.72E-181   | ** |
| siR_121569 | 8.0117  | 11.8594 | 0.56585072  | 5.61E-06    |    |
| siR_12157  | 1.9852  | 1.0069  | -0.97936395 | 0.003044324 |    |
| siR_12158  | 6.4873  | 4.4753  | -0.53563376 | 0.001448397 |    |
| siR_121581 | 0.01    | 13.6123 | 10.41069514 | 1.10E-114   | ** |
| siR_121587 | 1.418   | 0.1492  | -3.24853809 | 2.36E-08    | ** |
| siR_121589 | 3.0132  | 0.8951  | -1.75117566 | 1.06E-08    | ** |
| siR_121596 | 0.01    | 1.6782  | 7.39077085  | 8.72E-15    | ** |
| siR_121599 | 5.8847  | 3.6548  | -0.68717641 | 0.000151387 |    |
| siR_121631 | 1.8788  | 0.7832  | -1.26235883 | 0.00040908  | ** |
| siR_121637 | 1.0635  | 0.4848  | -1.13335843 | 0.015328041 | *  |
| siR_121638 | 1.2762  | 0.5967  | -1.09677676 | 0.009487354 | ** |
| siR_121645 | 2.446   | 0.2611  | -3.22775004 | 1.71E-13    | ** |
| siR_121646 | 2.3397  | 0.2984  | -2.97100412 | 4.43E-12    | ** |
| siR_121650 | 11.4503 | 1.5663  | -2.86995293 | 4.98E-52    | ** |
| siR_121651 | 16.6969 | 2.6106  | -2.67712694 | 6.99E-70    | ** |
| siR_121664 | 0.01    | 4.6617  | 8.86471235  | 9.25E-40    | ** |
| siR_121665 | 8.7561  | 5.0347  | -0.79838262 | 1.36E-07    |    |
| siR_121704 | 45.1987 | 23.6816 | -0.93251472 | 1.24E-42    |    |
| siR_121727 | 2.7651  | 0.2984  | -3.21201222 | 4.96E-15    | ** |
| siR_121756 | 2.0561  | 0.2984  | -2.78459099 | 3.65E-10    | ** |
| siR_121770 | 7.09    | 3.6175  | -0.97079261 | 2.22E-08    |    |
| siR_121805 | 1.3825  | 0.3729  | -1.89041878 | 5.10E-05    | ** |
| siR_121806 | 0.01    | 45.4239 | 12.14923586 | 0           | ** |
| siR_121807 | 0.01    | 1.0442  | 6.70625425  | 1.77E-09    | ** |
| siR_121830 | 0.01    | 6.6383  | 9.37467002  | 2.63E-56    | ** |
| siR_121844 | 1.5243  | 0.5967  | -1.35306919 | 0.000806564 | ** |
| siR_121845 | 1.028   | 0.4475  | -1.19988068 | 0.012673013 | *  |
| siR_121846 | 1.2407  | 0.2611  | -2.24847995 | 1.86E-05    | ** |
| siR_121854 | 1.3116  | 0.9696  | -0.4358662  | 0.240578977 |    |
| siR_121855 | 2.6942  | 0.6713  | -2.0048274  | 3.19E-09    | ** |
| siR_12189  | 2.1624  | 0.5594  | -1.95068126 | 1.98E-07    | ** |
| siR_121913 | 1.4534  | 0.7832  | -0.89197914 | 0.019383579 |    |
| siR_121953 | 2.836   | 0.3356  | -3.07904291 | 7.76E-15    | ** |
| siR_12198  | 4.2894  | 1.268   | -1.75822111 | 6.96E-12    | ** |
| siR_122    | 2.2688  | 0.3356  | -2.75711482 | 5.50E-11    | ** |
| siR_12203  | 1.5243  | 0.6713  | -1.18311732 | 0.002538095 | ** |
| siR_122058 | 0.5317  | 1.0442  | 0.97371369  | 0.032467048 |    |
| siR_122061 | 1.4889  | 2.163   | 0.5387868   | 0.064451102 |    |
| siR_122069 | 0.9217  | 1.0442  | 0.18002891  | 0.646839721 |    |
| siR_122072 | 3.6868  | 2.0885  | -0.81990201 | 0.000482429 |    |
| siR_122079 | 5.4947  | 2.9835  | -0.88103494 | 5.71E-06    |    |
| siR_122096 | 5.9556  | 2.9835  | -0.99724108 | 1.61E-07    |    |
| siR_122106 | 0.01    | 4.8855  | 8.93236241  | 1.24E-41    | ** |
| siR_122107 | 0.01    | 1.3426  | 7.06888574  | 5.63E-12    | ** |

|            |          |          |             |             |    |
|------------|----------|----------|-------------|-------------|----|
| siR_122114 | 0.01     | 9.8083   | 9.9378593   | 7.68E-83    | ** |
| siR_122119 | 0.01     | 1.4172   | 7.14689956  | 1.34E-12    | ** |
| siR_12212  | 1.8434   | 0.7832   | -1.23491649 | 0.000580844 | ** |
| siR_122141 | 12.0884  | 2.8716   | -2.0736966  | 4.54E-38    | ** |
| siR_122159 | 0.01     | 6.4891   | 9.34187459  | 4.67E-55    | ** |
| siR_122163 | 1.6307   | 0.7459   | -1.12843726 | 0.002621199 | ** |
| siR_122189 | 18.8948  | 3.17     | -2.5754345  | 1.31E-75    | ** |
| siR_122230 | 3.8995   | 1.0815   | -1.85025549 | 1.29E-11    | ** |
| siR_122240 | 5.0693   | 5.7805   | 0.18940774  | 0.257382104 |    |
| siR_122276 | 0.01     | 1.0442   | 6.70625425  | 1.77E-09    | ** |
| siR_12230  | 10.4932  | 12.307   | 0.23002442  | 0.046265046 |    |
| siR_122309 | 1.8079   | 0.9696   | -0.89885328 | 0.008533461 |    |
| siR_12231  | 0.01     | 1.4172   | 7.14689956  | 1.34E-12    | ** |
| siR_122318 | 30.5224  | 1.8647   | -4.03285296 | 3.35E-183   | ** |
| siR_122321 | 11.1667  | 5.6687   | -0.97811308 | 1.54E-12    |    |
| siR_122323 | 0.8862   | 1.3426   | 0.59932532  | 0.109876009 |    |
| siR_122331 | 1.8079   | 0.5967   | -1.5992372  | 3.50E-05    | ** |
| siR_122352 | 3.5095   | 1.9766   | -0.82824456 | 0.000594147 |    |
| siR_122396 | 1.737    | 0.2611   | -2.73392339 | 1.25E-08    | ** |
| siR_122405 | 1.0989   | 0.1865   | -2.55881257 | 1.47E-05    | ** |
| siR_122415 | 0.01     | 2.0139   | 7.65384824  | 1.35E-17    | ** |
| siR_122419 | 0.01     | 10.4796  | 10.03336794 | 1.85E-88    | ** |
| siR_122430 | 0.01     | 2.2003   | 7.78155643  | 3.72E-19    | ** |
| siR_122434 | 0.01     | 6.5637   | 9.35836549  | 1.11E-55    | ** |
| siR_122459 | 2.7651   | 0.8951   | -1.62721088 | 1.98E-07    | ** |
| siR_122470 | 0.01     | 1.3053   | 7.02823761  | 1.15E-11    | ** |
| siR_122487 | 9.217    | 2.6479   | -1.79944861 | 1.29E-24    | ** |
| siR_122490 | 2.9423   | 1.6782   | -0.81002969 | 0.002054304 |    |
| siR_1225   | 1.737    | 0.8205   | -1.08202252 | 0.002661787 | ** |
| siR_122503 | 2.1624   | 1.3426   | -0.68760387 | 0.022190244 |    |
| siR_122541 | 0.01     | 9.0251   | 9.81779911  | 2.76E-76    | ** |
| siR_12255  | 1.0989   | 0.9696   | -0.1805985  | 0.64392648  |    |
| siR_122585 | 21.5536  | 4.9228   | -2.13037782 | 7.40E-69    | ** |
| siR_122589 | 3.9349   | 1.9766   | -0.99330603 | 2.24E-05    |    |
| siR_12263  | 148.2872 | 28.2688  | -2.39111152 | 0           | ** |
| siR_122633 | 2.127    | 0.5967   | -1.83374235 | 7.51E-07    | ** |
| siR_12267  | 13.1165  | 3.3564   | -1.96639624 | 1.58E-38    | ** |
| siR_122674 | 0.01     | 1.0442   | 6.70625425  | 1.77E-09    | ** |
| siR_12268  | 14.3927  | 2.6852   | -2.42223581 | 3.74E-54    | ** |
| siR_12269  | 1.418    | 0.3729   | -1.92699683 | 3.23E-05    | ** |
| siR_122708 | 2.0561   | 0.3729   | -2.46304973 | 4.71E-09    | ** |
| siR_12272  | 0.01     | 1.4918   | 7.22091032  | 3.17E-13    | ** |
| siR_122726 | 17.2641  | 5.2211   | -1.72534943 | 2.80E-42    | ** |
| siR_122750 | 1.6307   | 0.8951   | -0.86537062 | 0.015654369 |    |
| siR_122754 | 27.7219  | 28.9027  | 0.06017813  | 0.410223265 |    |
| siR_122756 | 227.6951 | 137.1668 | -0.73117191 | 1.99E-137   |    |
| siR_122757 | 8.2244   | 3.4683   | -1.24568174 | 1.69E-13    | ** |

|            |          |         |             |             |    |
|------------|----------|---------|-------------|-------------|----|
| siR_122764 | 41.6182  | 42.3285 | 0.0244148   | 0.683927757 |    |
| siR_122765 | 4.0058   | 1.4918  | -1.42503626 | 1.26E-08    | ** |
| siR_122769 | 16.8742  | 15.4024 | -0.13166394 | 0.174990667 |    |
| siR_122783 | 0.01     | 2.8343  | 8.14684866  | 1.83E-24    | ** |
| siR_122786 | 0.01     | 1.0442  | 6.70625425  | 1.77E-09    | ** |
| siR_122788 | 0.01     | 1.529   | 7.2564446   | 1.55E-13    | ** |
| siR_122793 | 0.01     | 5.1093  | 8.99698184  | 1.66E-43    | ** |
| siR_122840 | 1.3825   | 0.4475  | -1.62731989 | 0.000260107 | ** |
| siR_12285  | 30.5933  | 9.2862  | -1.72005548 | 2.71E-73    | ** |
| siR_122887 | 0.01     | 1.0442  | 6.70625425  | 1.77E-09    | ** |
| siR_122890 | 4.9275   | 3.7667  | -0.38755474 | 0.039491534 |    |
| siR_122905 | 0.01     | 1.1188  | 6.80580835  | 4.20E-10    | ** |
| siR_122906 | 6.3101   | 6.2281  | -0.01887076 | 0.90493886  |    |
| siR_122909 | 2.0915   | 0.8205  | -1.34996276 | 8.47E-05    | ** |
| siR_122918 | 0.01     | 1.3799  | 7.10841991  | 2.74E-12    | ** |
| siR_122920 | 9.7842   | 2.0512  | -2.25398573 | 2.28E-34    | ** |
| siR_122930 | 1.6307   | 1.1934  | -0.45041371 | 0.176306369 |    |
| siR_122934 | 1.8079   | 0.6713  | -1.42928533 | 0.000138786 | ** |
| siR_122951 | 0.01     | 4.2142  | 8.71911497  | 5.16E-36    | ** |
| siR_122967 | 2.7296   | 1.268   | -1.10613481 | 0.000119353 | ** |
| siR_122969 | 2.9069   | 0.634   | -2.1969267  | 6.85E-11    | ** |
| siR_122982 | 4.5376   | 1.4918  | -1.60487531 | 3.73E-11    | ** |
| siR_122997 | 3.7577   | 0.8578  | -2.13113667 | 3.10E-13    | ** |
| siR_123018 | 1.9497   | 0.7459  | -1.38619802 | 0.000108984 | ** |
| siR_123045 | 2.127    | 1.0442  | -1.02642197 | 0.001422645 | ** |
| siR_123062 | 1.028    | 0.8951  | -0.19971949 | 0.622135026 |    |
| siR_123069 | 1.4534   | 0.2984  | -2.28411237 | 2.74E-06    | ** |
| siR_123073 | 1.2053   | 0.4848  | -1.31393068 | 0.003684871 | ** |
| siR_123074 | 3.5804   | 1.268   | -1.49756603 | 2.41E-08    | ** |
| siR_123078 | 1.028    | 0.2611  | -1.9771659  | 0.000342937 | ** |
| siR_123082 | 42.0791  | 21.9288 | -0.94027698 | 2.43E-40    |    |
| siR_123086 | 2.2333   | 0.634   | -1.81662232 | 4.66E-07    | ** |
| siR_123091 | 3.6159   | 1.1188  | -1.69240262 | 9.04E-10    | ** |
| siR_123094 | 2.5524   | 1.3799  | -0.88729072 | 0.001937131 |    |
| siR_123103 | 0.01     | 1.1561  | 6.85312238  | 2.05E-10    | ** |
| siR_123105 | 0.01     | 2.163   | 7.75688986  | 7.63E-19    | ** |
| siR_123109 | 1.5598   | 0.4475  | -1.80140147 | 3.03E-05    | ** |
| siR_123120 | 163.6015 | 38.7856 | -2.07659295 | 0           | ** |
| siR_123144 | 4.0058   | 1.1188  | -1.84013823 | 8.12E-12    | ** |
| siR_123167 | 0.01     | 5.1093  | 8.99698184  | 1.66E-43    | ** |
| siR_123171 | 1.3825   | 0.7459  | -0.89022535 | 0.022894115 |    |
| siR_123178 | 2.8714   | 0.5594  | -2.35980216 | 1.27E-11    | ** |
| siR_123186 | 4.9275   | 3.2446  | -0.60281524 | 0.002035906 |    |
| siR_123204 | 1.2762   | 0.7459  | -0.77480031 | 0.052442918 |    |
| siR_123219 | 0.01     | 2.0885  | 7.70632333  | 3.21E-18    | ** |
| siR_123240 | 2.8005   | 4.1769  | 0.57674818  | 0.006191732 |    |
| siR_123267 | 1.2053   | 0.3729  | -1.69253158 | 0.000467353 | ** |

|            |         |         |             |             |    |
|------------|---------|---------|-------------|-------------|----|
| siR_123362 | 0.01    | 7.1977  | 9.49139216  | 5.47E-61    | ** |
| siR_123363 | 0.01    | 6.6383  | 9.37467002  | 2.63E-56    | ** |
| siR_123372 | 1.8079  | 0.3729  | -2.27745418 | 1.64E-07    | ** |
| siR_123378 | 2.2688  | 1.1188  | -1.01997728 | 0.001040485 | ** |
| siR_123388 | 1.7016  | 0.7459  | -1.18983781 | 0.001338714 | ** |
| siR_123443 | 0.01    | 1.1188  | 6.80580835  | 4.20E-10    | ** |
| siR_123449 | 14.7826 | 8.6895  | -0.76655497 | 3.65E-11    |    |
| siR_123451 | 2.0915  | 2.6852  | 0.36049155  | 0.154634876 |    |
| siR_123454 | 3.0841  | 1.4545  | -1.08432625 | 5.64E-05    | ** |
| siR_123467 | 0.01    | 1.3053  | 7.02823761  | 1.15E-11    | ** |
| siR_123470 | 0.01    | 1.0815  | 6.75688986  | 8.62E-10    | ** |
| siR_123476 | 1.2407  | 0.1119  | -3.47087237 | 8.26E-08    | ** |
| siR_123518 | 1.3471  | 0.1865  | -2.85260942 | 3.30E-07    | ** |
| siR_12353  | 19.6747 | 11.1509 | -0.81918148 | 6.15E-16    |    |
| siR_123533 | 1.0989  | 0.0746  | -3.88074067 | 1.47E-07    | ** |
| siR_12359  | 1.418   | 0.5594  | -1.34190537 | 0.001335576 | ** |
| siR_123590 | 2.7296  | 0.7832  | -1.80123688 | 2.88E-08    | ** |
| siR_1236   | 0.01    | 1.0815  | 6.75688986  | 8.62E-10    | ** |
| siR_12365  | 2.6942  | 1.7901  | -0.58981677 | 0.025702861 |    |
| siR_123669 | 0.01    | 8.0182  | 9.64713459  | 7.41E-68    | ** |
| siR_123679 | 3.4032  | 4.438   | 0.38301773  | 0.052551529 |    |
| siR_123683 | 4.1476  | 3.7294  | -0.15333322 | 0.437141649 |    |
| siR_123685 | 0.01    | 9.2862  | 9.85894454  | 1.80E-78    | ** |
| siR_123710 | 1.0635  | 0.1119  | -3.24853809 | 1.55E-06    | ** |
| siR_123719 | 0.6381  | 1.2307  | 0.94762469  | 0.022964794 |    |
| siR_123732 | 1.0635  | 0.2984  | -1.83350059 | 0.000528454 | ** |
| siR_123734 | 3.2259  | 0.4848  | -2.73424011 | 5.77E-15    | ** |
| siR_123737 | 1.0989  | 0.1492  | -2.88074067 | 3.93E-06    | ** |
| siR_123765 | 1.5952  | 0.2984  | -2.41841787 | 3.60E-07    | ** |
| siR_12381  | 0.01    | 1.8274  | 7.51364865  | 4.92E-16    | ** |
| siR_123824 | 1.4534  | 0.634   | -1.19687707 | 0.002948104 | ** |
| siR_12383  | 0.01    | 1.6782  | 7.39077085  | 8.72E-15    | ** |
| siR_123868 | 1.2053  | 0.2984  | -2.01407284 | 8.31E-05    | ** |
| siR_123872 | 1.9497  | 0.3356  | -2.53843753 | 6.67E-09    | ** |
| siR_123879 | 1.0989  | 0.2238  | -2.29577817 | 4.70E-05    | ** |
| siR_123901 | 2.0206  | 1.529   | -0.40219535 | 0.174476022 |    |
| siR_123905 | 1.5243  | 0.3729  | -2.03128617 | 7.99E-06    | ** |
| siR_123907 | 1.5598  | 0.5594  | -1.4794089  | 0.000288819 | ** |
| siR_123913 | 0.01    | 3.5056  | 8.45351758  | 4.40E-30    | ** |
| siR_123919 | 0.01    | 1.6036  | 7.32517051  | 3.67E-14    | ** |
| siR_123961 | 2.1624  | 0.5221  | -2.05023535 | 7.77E-08    | ** |
| siR_123969 | 1.9143  | 0.5967  | -1.68173926 | 1.01E-05    | ** |
| siR_123980 | 1.5952  | 0.4848  | -1.71827571 | 4.42E-05    | ** |
| siR_123990 | 0.01    | 1.8274  | 7.51364865  | 4.92E-16    | ** |
| siR_123991 | 0.01    | 1.9766  | 7.62687714  | 2.78E-17    | ** |
| siR_124048 | 2.6942  | 3.1327  | 0.21754967  | 0.340874764 |    |
| siR_124049 | 1.5598  | 1.529   | -0.02877265 | 0.930303239 |    |

|            |         |         |             |             |    |
|------------|---------|---------|-------------|-------------|----|
| siR_124053 | 8.4016  | 4.3261  | -0.95759709 | 1.71E-09    |    |
| siR_124059 | 1.1698  | 0.0746  | -3.97094245 | 4.33E-08    | ** |
| siR_124066 | 1.3116  | 1.4918  | 0.18572633  | 0.572775628 |    |
| siR_124072 | 1.5243  | 0.8205  | -0.89357163 | 0.016425748 |    |
| siR_124076 | 3.6868  | 0.9696  | -1.92690755 | 1.36E-11    | ** |
| siR_124102 | 0.01    | 2.536   | 7.98641094  | 5.76E-22    | ** |
| siR_12412  | 5.3529  | 6.0043  | 0.16567536  | 0.31058031  |    |
| siR_124135 | 13.0456 | 11.2627 | -0.21201057 | 0.058310597 |    |
| siR_12415  | 1.4889  | 1.6782  | 0.1726678   | 0.576831629 |    |
| siR_124175 | 2.0915  | 2.163   | 0.04849567  | 0.854029511 |    |
| siR_124182 | 8.0826  | 1.0442  | -2.95242139 | 3.19E-38    | ** |
| siR_124202 | 4.7503  | 2.6479  | -0.84316999 | 4.87E-05    |    |
| siR_124222 | 1.1344  | 0.634   | -0.83937469 | 0.050540314 |    |
| siR_124224 | 4.4312  | 4.7736  | 0.10738024  | 0.55343151  |    |
| siR_124235 | 0.01    | 1.3426  | 7.06888574  | 5.63E-12    | ** |
| siR_124236 | 7.2318  | 7.4588  | 0.04458876  | 0.755208411 |    |
| siR_124238 | 3.9349  | 2.6106  | -0.59194555 | 0.006729656 |    |
| siR_124246 | 1.2407  | 0.5594  | -1.14920216 | 0.007946935 | ** |
| siR_124252 | 1.4889  | 0.3729  | -1.99738616 | 1.28E-05    | ** |
| siR_124262 | 1.2407  | 0.1865  | -2.73390678 | 1.71E-06    | ** |
| siR_124285 | 4.4667  | 1.3053  | -1.77482794 | 1.85E-12    | ** |
| siR_124286 | 1.5952  | 0.4102  | -1.95933792 | 8.02E-06    | ** |
| siR_124303 | 1.3116  | 0.1492  | -3.13600837 | 1.33E-07    | ** |
| siR_124309 | 1.3116  | 0.4848  | -1.4358662  | 0.001178471 | ** |
| siR_124351 | 19.3911 | 13.7241 | -0.4986831  | 2.36E-07    |    |
| siR_124353 | 14.9953 | 9.3235  | -0.68556684 | 1.49E-09    |    |
| siR_124362 | 1.0635  | 0.5967  | -0.83374235 | 0.060029399 |    |
| siR_124368 | 1.4534  | 0.4848  | -1.58397021 | 0.000237648 | ** |
| siR_124377 | 14.6408 | 1.6409  | -3.15743516 | 1.65E-72    | ** |
| siR_124378 | 0.01    | 1.3426  | 7.06888574  | 5.63E-12    | ** |
| siR_124381 | 0.01    | 1.0815  | 6.75688986  | 8.62E-10    | ** |
| siR_124382 | 0.01    | 1.0442  | 6.70625425  | 1.77E-09    | ** |
| siR_124384 | 0.01    | 1.1561  | 6.85312238  | 2.05E-10    | ** |
| siR_124387 | 3.864   | 1.902   | -1.02257785 | 1.69E-05    | ** |
| siR_124394 | 1.0635  | 0.8205  | -0.37424479 | 0.360625484 |    |
| siR_124410 | 18.6821 | 9.0997  | -1.03776574 | 7.37E-22    | ** |
| siR_124419 | 4.2185  | 0.9323  | -2.17786393 | 4.70E-15    | ** |
| siR_124423 | 1.6307  | 1.268   | -0.36293665 | 0.268725219 |    |
| siR_124426 | 4.3249  | 4.1769  | -0.05023417 | 0.792370739 |    |
| siR_124439 | 1.1344  | 0.5594  | -1.01997728 | 0.02136103  | *  |
| siR_124478 | 1.418   | 0.6713  | -1.07882799 | 0.006897488 | ** |
| siR_124481 | 20.6673 | 4.2888  | -2.26870398 | 2.41E-71    | ** |
| siR_124485 | 1.0635  | 0.0746  | -3.83350059 | 2.71E-07    | ** |
| siR_124487 | 1.2053  | 0.5967  | -1.0143146  | 0.01809496  | *  |
| siR_124491 | 1.9143  | 1.1934  | -0.68173926 | 0.032888999 |    |
| siR_124496 | 0.01    | 1.2307  | 6.94333532  | 4.86E-11    | ** |
| siR_124497 | 1.4889  | 0.1865  | -2.99699932 | 3.55E-08    | ** |

|            |            |           |              |              |    |
|------------|------------|-----------|--------------|--------------|----|
| siR_124499 | 1. 0635    | 0. 2611   | -2. 02614567 | 0. 000213675 | ** |
| siR_12450  | 10. 2096   | 4. 8482   | -1. 07440522 | 2. 85E-13    | ** |
| siR_124509 | 11. 3085   | 3. 5056   | -1. 68967428 | 1. 78E-27    | ** |
| siR_124510 | 1. 0635    | 0. 1492   | -2. 83350059 | 6. 84E-06    | ** |
| siR_124518 | 2. 4106    | 0. 0746   | -5. 01407284 | 1. 16E-17    | ** |
| siR_124539 | 1. 7016    | 1. 1934   | -0. 51181426 | 0. 120249063 |    |
| siR_124540 | 3. 4741    | 1. 6782   | -1. 04972462 | 3. 11E-05    | ** |
| siR_124542 | 1. 7725    | 1. 8647   | 0. 07315792  | 0. 798401177 |    |
| siR_124543 | 0. 6735    | 1. 0069   | 0. 58017056  | 0. 17959779  |    |
| siR_124610 | 1. 3116    | 0. 3356   | -1. 96651319 | 5. 19E-05    | ** |
| siR_124613 | 3. 4741    | 0. 5967   | -2. 5415616  | 6. 84E-15    | ** |
| siR_124625 | 1. 418     | 1. 1561   | -0. 29459134 | 0. 397965171 |    |
| siR_124665 | 20. 3837   | 7. 0858   | -1. 5244133  | 8. 22E-42    | ** |
| siR_1247   | 3. 155     | 2. 3868   | -0. 40256232 | 0. 08845645  |    |
| siR_124715 | 0. 01      | 1. 0815   | 6. 75688986  | 8. 62E-10    | ** |
| siR_12472  | 2. 0915    | 0. 8951   | -1. 22441722 | 0. 000267923 | ** |
| siR_124723 | 0. 01      | 1. 7528   | 7. 45351758  | 2. 07E-15    | ** |
| siR_124752 | 1. 0989    | 0. 0373   | -4. 88074067 | 1. 72E-08    | ** |
| siR_124753 | 3. 9704    | 0. 5594   | -2. 8273322  | 1. 04E-18    | ** |
| siR_124772 | 1. 9852    | 0. 1492   | -3. 73396492 | 1. 83E-12    | ** |
| siR_1248   | 4. 7857    | 3. 2073   | -0. 57737066 | 0. 003449394 |    |
| siR_124807 | 3. 0487    | 2. 797    | -0. 12431394 | 0. 58842659  |    |
| siR_124823 | 0. 01      | 2. 9835   | 8. 22086197  | 1. 03E-25    | ** |
| siR_124832 | 0. 01      | 3. 0581   | 8. 25649177  | 2. 46E-26    | ** |
| siR_124852 | 0. 01      | 1. 1934   | 6. 89893387  | 9. 98E-11    | ** |
| siR_124858 | 1. 0989    | 0. 4848   | -1. 1805985  | 0. 010852128 | *  |
| siR_12489  | 1. 7016    | 0. 7459   | -1. 18983781 | 0. 001338714 | ** |
| siR_124924 | 6. 4519    | 1. 3053   | -2. 30534266 | 8. 92E-24    | ** |
| siR_124946 | 1. 2762    | 0. 6713   | -0. 92682489 | 0. 023898405 |    |
| siR_124966 | 56. 5781   | 25. 8819  | -1. 1283002  | 1. 06E-71    | ** |
| siR_124967 | 1. 2053    | 0. 4848   | -1. 31393068 | 0. 003684871 | ** |
| siR_124972 | 3. 0841    | 1. 4545   | -1. 08432625 | 5. 64E-05    | ** |
| siR_124977 | 1. 7016    | 0. 7086   | -1. 26384857 | 0. 000771078 | ** |
| siR_124991 | 846. 6158  | 188. 5205 | -2. 166986   | 0            | ** |
| siR_124992 | 12. 0884   | 2. 7597   | -2. 13103996 | 2. 33E-39    | ** |
| siR_124996 | 438. 9059  | 57. 7309  | -2. 92649604 | 0            | ** |
| siR_124997 | 3. 2968    | 1. 2307   | -1. 42158724 | 2. 63E-07    | ** |
| siR_124998 | 1. 5598    | 0. 1119   | -3. 80107911 | 3. 76E-10    | ** |
| siR_12500  | 0. 01      | 2. 8343   | 8. 14684866  | 1. 83E-24    | ** |
| siR_125001 | 0. 01      | 22. 6001  | 11. 14211344 | 6. 42E-190   | ** |
| siR_125006 | 2474. 4068 | 302. 1176 | -3. 03390057 | 0            | ** |
| siR_125007 | 27. 0129   | 12. 9037  | -1. 06586373 | 3. 39E-32    | ** |
| siR_125008 | 51. 8987   | 11. 7476  | -2. 14333235 | 1. 64E-164   | ** |
| siR_125009 | 10. 2096   | 5. 3703   | -0. 92685176 | 1. 03E-10    |    |
| siR_125010 | 2. 3397    | 0. 4102   | -2. 51192416 | 2. 49E-10    | ** |
| siR_12502  | 0. 01      | 1. 8274   | 7. 51364865  | 4. 92E-16    | ** |
| siR_125036 | 1. 9143    | 0. 5967   | -1. 68173926 | 1. 01E-05    | ** |

|            |         |         |             |             |    |
|------------|---------|---------|-------------|-------------|----|
| siR_125037 | 0.8153  | 1.0069  | 0.30451749  | 0.458490285 |    |
| siR_125054 | 1.3116  | 0.3729  | -1.8144671  | 0.00012559  | ** |
| siR_125056 | 1.028   | 0.5594  | -0.87788811 | 0.053501766 |    |
| siR_125064 | 0.01    | 32.1473 | 11.65048186 | 7.75E-270   | ** |
| siR_125109 | 3.7222  | 1.6409  | -1.18166826 | 2.09E-06    | ** |
| siR_125135 | 1.2407  | 0.6713  | -0.88612477 | 0.0320329   |    |
| siR_125150 | 0.01    | 24.4648 | 11.25649177 | 1.58E-205   | ** |
| siR_125161 | 0.01    | 60.9009 | 12.57224783 | 0           | ** |
| siR_125168 | 0.01    | 6.0789  | 9.24766648  | 1.27E-51    | ** |
| siR_125206 | 0.01    | 2.4614  | 7.94333532  | 2.43E-21    | ** |
| siR_125209 | 0.01    | 3.7667  | 8.55715732  | 2.87E-32    | ** |
| siR_125210 | 0.01    | 1.4918  | 7.22091032  | 3.17E-13    | ** |
| siR_125234 | 1.418   | 0.7459  | -0.9268034  | 0.017122488 |    |
| siR_125246 | 2.5169  | 1.1188  | -1.16969574 | 0.000112756 | ** |
| siR_125262 | 1.0989  | 0.1492  | -2.88074067 | 3.93E-06    | ** |
| siR_125281 | 1.5598  | 0.7086  | -1.13831769 | 0.003056445 | ** |
| siR_125285 | 0.01    | 2.2003  | 7.78155643  | 3.72E-19    | ** |
| siR_125338 | 1.418   | 0.3729  | -1.92699683 | 3.23E-05    | ** |
| siR_125347 | 0.01    | 1.3053  | 7.02823761  | 1.15E-11    | ** |
| siR_125359 | 13.6837 | 7.235   | -0.91939346 | 1.05E-13    |    |
| siR_125366 | 0.01    | 1.7901  | 7.48389637  | 1.01E-15    | ** |
| siR_125368 | 0.01    | 1.4545  | 7.18437949  | 6.51E-13    | ** |
| siR_125386 | 4.0058  | 2.3122  | -0.7928242  | 0.000406321 |    |
| siR_125387 | 28.3245 | 20.8473 | -0.44218994 | 2.21E-08    |    |
| siR_125394 | 74.5513 | 30.6183 | -1.28383933 | 1.01E-114   | ** |
| siR_125395 | 1.1344  | 0.6713  | -0.75689989 | 0.073613489 |    |
| siR_125398 | 5.4238  | 3.3192  | -0.70846842 | 0.000187382 |    |
| siR_125399 | 52.2887 | 15.5142 | -1.7529099  | 3.00E-127   | ** |
| siR_125401 | 2.1624  | 1.6036  | -0.43131909 | 0.13364624  |    |
| siR_125414 | 12.8683 | 10.5542 | -0.28600425 | 0.012257965 |    |
| siR_125430 | 1.5598  | 0.0373  | -5.38604162 | 4.02E-12    | ** |
| siR_125434 | 10.3159 | 8.6522  | -0.25373077 | 0.045512102 |    |
| siR_125449 | 1.9143  | 1.268   | -0.59426219 | 0.058982077 |    |
| siR_125451 | 0.01    | 3.8786  | 8.59939219  | 3.33E-33    | ** |
| siR_125455 | 1.3471  | 0.9696  | -0.47439535 | 0.198369951 |    |
| siR_125463 | 1.418   | 0.6713  | -1.07882799 | 0.006897488 | ** |
| siR_125503 | 0.01    | 2.4241  | 7.9213054   | 4.98E-21    | ** |
| siR_125504 | 1.1698  | 0.2984  | -1.97094245 | 0.000133017 | ** |
| siR_125514 | 1.737   | 0.5221  | -1.73419969 | 1.76E-05    | ** |
| siR_125524 | 0.01    | 5.7805  | 9.17505048  | 3.99E-49    | ** |
| siR_12554  | 10.635  | 3.0954  | -1.78062228 | 8.80E-28    | ** |
| siR_125541 | 2.3751  | 1.3053  | -0.86360683 | 0.003488456 |    |
| siR_125548 | 0.01    | 2.3495  | 7.87620996  | 2.10E-20    | ** |
| siR_125553 | 0.01    | 3.7667  | 8.55715732  | 2.87E-32    | ** |
| siR_12556  | 0.01    | 12.7918 | 10.32100357 | 8.15E-108   | ** |
| siR_125579 | 3.864   | 1.9766  | -0.96707415 | 3.98E-05    |    |
| siR_125581 | 0.01    | 1.6782  | 7.39077085  | 8.72E-15    | ** |



|            |          |          |              |              |    |
|------------|----------|----------|--------------|--------------|----|
| siR_125607 | 1. 9143  | 0. 8205  | -1. 2222417  | 0. 000503383 | ** |
| siR_125608 | 1. 0989  | 0. 634   | -0. 79350536 | 0. 066742311 |    |
| siR_125629 | 2. 127   | 0. 7459  | -1. 5117659  | 1. 59E-05    | ** |
| siR_125630 | 1. 6661  | 0. 4848  | -1. 78101339 | 1. 86E-05    | ** |
| siR_125631 | 1. 1344  | 0. 4102  | -1. 46753004 | 0. 002218064 | ** |
| siR_125648 | 2. 5878  | 1. 1188  | -1. 20977396 | 5. 77E-05    | ** |
| siR_125653 | 4. 254   | 1. 6036  | -1. 40750571 | 6. 20E-09    | ** |
| siR_125663 | 2. 446   | 0. 9323  | -1. 39155823 | 1. 33E-05    | ** |
| siR_125665 | 1. 8079  | 1. 5663  | -0. 20695432 | 0. 495278053 |    |
| siR_125666 | 5. 6011  | 5. 4076  | -0. 05072175 | 0. 761719072 |    |
| siR_125669 | 3. 3677  | 2. 4987  | -0. 43058593 | 0. 060904434 |    |
| siR_125671 | 1. 9143  | 1. 1188  | -0. 77486478 | 0. 017050104 |    |
| siR_125673 | 2. 0561  | 1. 6409  | -0. 32542311 | 0. 261432417 |    |
| siR_125684 | 1. 1344  | 0. 2984  | -1. 92661    | 0. 000211792 | ** |
| siR_125686 | 6. 3455  | 1. 3799  | -2. 20117013 | 3. 32E-22    | ** |
| siR_125687 | 1. 3116  | 0. 2611  | -2. 32865344 | 6. 82E-06    | ** |
| siR_125730 | 14. 7117 | 1. 5663  | -3. 2315315  | 1. 99E-74    | ** |
| siR_125732 | 79. 3724 | 18. 1248 | -2. 13067235 | 1. 05E-248   | ** |
| siR_125758 | 1. 2407  | 0. 3356  | -1. 88633969 | 0. 000130463 | ** |
| siR_12576  | 1. 9143  | 1. 7901  | -0. 09677676 | 0. 739086839 |    |
| siR_125772 | 1. 3116  | 0. 2238  | -2. 55104587 | 2. 11E-06    | ** |
| siR_125779 | 5. 282   | 0. 4102  | -3. 6866849  | 7. 94E-31    | ** |
| siR_12578  | 5. 8138  | 2. 6106  | -1. 15510002 | 5. 44E-09    | ** |
| siR_12580  | 1. 7016  | 2. 163   | 0. 34614173  | 0. 218923244 |    |
| siR_125807 | 2. 446   | 1. 7901  | -0. 45038422 | 0. 096546512 |    |
| siR_125816 | 0. 01    | 1. 3426  | 7. 06888574  | 5. 63E-12    | ** |
| siR_125820 | 4. 1476  | 1. 6036  | -1. 37096244 | 1. 86E-08    | ** |
| siR_125825 | 3. 0132  | 0. 5221  | -2. 52889837 | 5. 03E-13    | ** |
| siR_125836 | 3. 1905  | 2. 797   | -0. 18990228 | 0. 402264911 |    |
| siR_125868 | 1. 9497  | 0. 8205  | -1. 24867691 | 0. 000355602 | ** |
| siR_125915 | 0. 01    | 1. 3426  | 7. 06888574  | 5. 63E-12    | ** |
| siR_12595  | 2. 9069  | 0. 7086  | -2. 03643807 | 5. 05E-10    | ** |
| siR_125951 | 2. 7296  | 1. 0069  | -1. 43876914 | 2. 35E-06    | ** |
| siR_125959 | 0. 01    | 3. 5429  | 8. 46878694  | 2. 15E-30    | ** |
| siR_125992 | 2. 1624  | 1. 2307  | -0. 81315429 | 0. 008149142 |    |
| siR_126006 | 3. 6159  | 0. 7832  | -2. 20690211 | 2. 72E-13    | ** |
| siR_126016 | 2. 7651  | 0. 8951  | -1. 62721088 | 1. 98E-07    | ** |
| siR_126028 | 6. 7355  | 1. 8274  | -1. 88199259 | 1. 89E-19    | ** |
| siR_126033 | 0. 01    | 11. 5984 | 10. 17971008 | 7. 96E-98    | ** |
| siR_126036 | 18. 3985 | 11. 4865 | -0. 67964888 | 2. 98E-11    |    |
| siR_126041 | 12. 8683 | 12. 4189 | -0. 05128408 | 0. 640514177 |    |
| siR_126089 | 0. 01    | 3. 3192  | 8. 37469175  | 1. 60E-28    | ** |
| siR_126096 | 3. 3677  | 2. 2003  | -0. 61406339 | 0. 009633644 |    |
| siR_12612  | 2. 0915  | 0. 8205  | -1. 34996276 | 8. 47E-05    | ** |
| siR_126163 | 3. 155   | 1. 9766  | -0. 67461906 | 0. 006468521 |    |
| siR_126175 | 2. 9778  | 0. 8951  | -1. 73412609 | 1. 62E-08    | ** |
| siR_126176 | 0. 01    | 55. 6052 | 12. 44100409 | 0            | ** |

|            |         |         |             |             |    |
|------------|---------|---------|-------------|-------------|----|
| siR_126177 | 0.01    | 1.0069  | 6.6537766   | 3.63E-09    | ** |
| siR_126189 | 10.4932 | 1.4545  | -2.85085951 | 1.71E-47    | ** |
| siR_12619  | 3.1905  | 0.8578  | -1.89506931 | 5.11E-10    | ** |
| siR_126200 | 2.7296  | 0.9323  | -1.54982338 | 6.11E-07    | ** |
| siR_126203 | 2.2333  | 1.3053  | -0.77479564 | 0.00988143  |    |
| siR_126219 | 0.01    | 1.6409  | 7.35834351  | 1.79E-14    | ** |
| siR_126229 | 2.0915  | 0.2238  | -3.22425606 | 1.05E-11    | ** |
| siR_126232 | 0.01    | 1.4172  | 7.14689956  | 1.34E-12    | ** |
| siR_126254 | 1.1344  | 0.8205  | -0.4673542  | 0.245331337 |    |
| siR_126274 | 4.254   | 3.4683  | -0.29459134 | 0.139754    |    |
| siR_126275 | 4.254   | 2.3122  | -0.87955384 | 6.82E-05    |    |
| siR_126288 | 0.01    | 1.268   | 6.98641094  | 2.37E-11    | ** |
| siR_126291 | 26.7647 | 12.5307 | -1.09486447 | 2.91E-33    | ** |
| siR_126296 | 8.0471  | 2.536   | -1.66591422 | 1.26E-19    | ** |
| siR_126321 | 1.0635  | 0.1492  | -2.83350059 | 6.84E-06    | ** |
| siR_126328 | 7.4445  | 3.2446  | -1.19813432 | 1.05E-11    | ** |
| siR_126337 | 1.9852  | 0.8578  | -1.21057114 | 0.000435901 | ** |
| siR_126423 | 0.01    | 4.4753  | 8.80584059  | 3.37E-38    | ** |
| siR_126424 | 0.01    | 1.3053  | 7.02823761  | 1.15E-11    | ** |
| siR_126465 | 0.01    | 1.7901  | 7.48389637  | 1.01E-15    | ** |
| siR_126477 | 0.01    | 1.3799  | 7.10841991  | 2.74E-12    | ** |
| siR_12648  | 2.9778  | 1.0815  | -1.46121319 | 6.00E-07    | ** |
| siR_126508 | 0.01    | 6.4891  | 9.34187459  | 4.67E-55    | ** |
| siR_126509 | 0.01    | 1.5663  | 7.29121675  | 7.54E-14    | ** |
| siR_126510 | 0.01    | 1.2307  | 6.94333532  | 4.86E-11    | ** |
| siR_126512 | 0.01    | 44.3424 | 12.11447114 | 0           | ** |
| siR_126520 | 0.01    | 2.3122  | 7.85312238  | 4.30E-20    | ** |
| siR_126531 | 3.0132  | 0.1865  | -4.0140489  | 3.02E-19    | ** |
| siR_126556 | 3.9349  | 2.0139  | -0.96633492 | 3.42E-05    |    |
| siR_12656  | 6.7     | 4.5871  | -0.54657874 | 0.000978701 |    |
| siR_126562 | 3.1196  | 1.8647  | -0.74241751 | 0.003235838 |    |
| siR_126564 | 3.4032  | 1.3053  | -1.38251052 | 3.02E-07    | ** |
| siR_126565 | 18.7176 | 5.706   | -1.71384381 | 2.75E-45    | ** |
| siR_126569 | 2.4106  | 1.268   | -0.92683753 | 0.001786315 |    |
| siR_12657  | 1.0989  | 0.9696  | -0.1805985  | 0.64392648  |    |
| siR_126573 | 1.418   | 6.1162  | 2.10877805  | 1.22E-20    | ** |
| siR_126578 | 3.3677  | 17.0806 | 2.34252312  | 2.76E-62    | ** |
| siR_126579 | 0.5672  | 4.8109  | 3.08437737  | 1.17E-24    | ** |
| siR_126583 | 5.5302  | 1.5663  | -1.81997109 | 1.43E-15    | ** |
| siR_126587 | 1.9143  | 1.529   | -0.32422853 | 0.280552793 |    |
| siR_12659  | 1.3471  | 0.3356  | -2.00504233 | 3.25E-05    | ** |
| siR_1266   | 0.01    | 1.0442  | 6.70625425  | 1.77E-09    | ** |
| siR_126636 | 0.01    | 3.17    | 8.30833903  | 2.84E-27    | ** |
| siR_126667 | 1.0989  | 0.2611  | -2.07338574 | 0.000132441 | ** |
| siR_126676 | 1.3825  | 0.2611  | -2.40460512 | 2.46E-06    | ** |
| siR_126682 | 0.01    | 1.268   | 6.98641094  | 2.37E-11    | ** |
| siR_12669  | 14.499  | 6.0789  | -1.25407121 | 7.00E-23    | ** |

|            |          |          |              |              |    |
|------------|----------|----------|--------------|--------------|----|
| siR_126705 | 1. 8079  | 0. 3729  | -2. 27745418 | 1. 64E-07    | ** |
| siR_12671  | 5. 5302  | 1. 9766  | -1. 48431071 | 5. 14E-12    | ** |
| siR_126748 | 4. 1122  | 4. 4007  | 0. 09782259  | 0. 603427187 |    |
| siR_126753 | 9. 9969  | 18. 5723 | 0. 89359979  | 2. 19E-17    |    |
| siR_126789 | 1. 2407  | 0. 4475  | -1. 47119473 | 0. 001326969 | ** |
| siR_12680  | 0. 01    | 2. 0885  | 7. 70632333  | 3. 21E-18    | ** |
| siR_126831 | 1. 1698  | 0. 7459  | -0. 64920776 | 0. 112106036 |    |
| siR_126846 | 70. 0137 | 44. 417  | -0. 6565253  | 2. 55E-36    |    |
| siR_126851 | 22. 298  | 19. 2063 | -0. 2153347  | 0. 011923548 |    |
| siR_126852 | 2. 5169  | 1. 4172  | -0. 82860453 | 0. 003683551 |    |
| siR_126857 | 0. 01    | 9. 0251  | 9. 81779911  | 2. 76E-76    | ** |
| siR_126861 | 6. 3101  | 5. 2957  | -0. 25284147 | 0. 11948828  |    |
| siR_126877 | 11. 2731 | 6. 7875  | -0. 7319321  | 2. 87E-08    |    |
| siR_126897 | 2. 446   | 2. 6106  | 0. 09395702  | 0. 700256411 |    |
| siR_126901 | 1. 0989  | 0. 7459  | -0. 55900597 | 0. 178387672 |    |
| siR_126913 | 1. 4534  | 0. 7086  | -1. 03638844 | 0. 008088782 | ** |
| siR_12692  | 2. 3042  | 1. 902   | -0. 2767487  | 0. 307490572 |    |
| siR_12693  | 1. 0635  | 0. 7086  | -0. 58577666 | 0. 167596979 |    |
| siR_126959 | 1. 5243  | 1. 8647  | 0. 29079667  | 0. 333016373 |    |
| siR_126966 | 18. 8239 | 13. 5004 | -0. 47956341 | 8. 97E-07    |    |
| siR_126967 | 4. 5021  | 1. 902   | -1. 24308086 | 5. 48E-08    | ** |
| siR_12701  | 1. 4534  | 0. 9323  | -0. 64056564 | 0. 079347154 |    |
| siR_127019 | 6. 4873  | 6. 4145  | -0. 01628134 | 0. 916932022 |    |
| siR_127020 | 1. 7725  | 0. 8205  | -1. 11121039 | 0. 001927105 | ** |
| siR_127026 | 6. 4519  | 4. 5871  | -0. 49214172 | 0. 003280107 |    |
| siR_127054 | 7. 5863  | 2. 4987  | -1. 60221873 | 1. 16E-17    | ** |
| siR_127072 | 2. 4106  | 2. 0512  | -0. 23292411 | 0. 376073249 |    |
| siR_127115 | 0. 01    | 2. 2376  | 7. 80580835  | 1. 81E-19    | ** |
| siR_127135 | 1. 1344  | 0. 1492  | -2. 92661    | 2. 25E-06    | ** |
| siR_127155 | 0. 01    | 5. 0347  | 8. 97576201  | 6. 99E-43    | ** |
| siR_127221 | 0. 01    | 12. 0459 | 10. 23432647 | 1. 43E-101   | ** |
| siR_127228 | 1. 1698  | 0. 2611  | -2. 16358753 | 5. 01E-05    | ** |
| siR_127272 | 0. 01    | 1. 268   | 6. 98641094  | 2. 37E-11    | ** |
| siR_12728  | 9. 7842  | 4. 8855  | -1. 00194767 | 1. 48E-11    | ** |
| siR_127320 | 3. 5095  | 1. 7155  | -1. 03263638 | 3. 61E-05    | ** |
| siR_127342 | 79. 9751 | 17. 2298 | -2. 21464494 | 5. 93E-263   | ** |
| siR_127365 | 0. 01    | 1. 1188  | 6. 80580835  | 4. 20E-10    | ** |
| siR_12737  | 0. 01    | 3. 431   | 8. 42248532  | 1. 85E-29    | ** |
| siR_127431 | 6. 4519  | 2. 9089  | -1. 14925038 | 9. 25E-10    | ** |
| siR_127487 | 0. 01    | 4. 7736  | 8. 89893387  | 1. 07E-40    | ** |
| siR_127493 | 0. 01    | 2. 0139  | 7. 65384824  | 1. 35E-17    | ** |
| siR_127497 | 0. 01    | 1. 4545  | 7. 18437949  | 6. 51E-13    | ** |
| siR_127512 | 1. 7725  | 0. 4848  | -1. 87032402 | 4. 91E-06    | ** |
| siR_12755  | 0. 01    | 1. 7155  | 7. 42248532  | 4. 25E-15    | ** |
| siR_127558 | 1. 9143  | 0. 1119  | -4. 096535   | 8. 31E-13    | ** |
| siR_127609 | 0. 01    | 1. 7901  | 7. 48389637  | 1. 01E-15    | ** |
| siR_12763  | 0. 01    | 1. 6782  | 7. 39077085  | 8. 72E-15    | ** |

|            |          |         |             |             |    |
|------------|----------|---------|-------------|-------------|----|
| siR_127670 | 1.028    | 1.3053  | 0.34454116  | 0.342702363 |    |
| siR_127697 | 1.5598   | 0.634   | -1.29880631 | 0.001018403 | ** |
| siR_127707 | 3.864    | 1.9766  | -0.96707415 | 3.98E-05    |    |
| siR_127709 | 25.7367  | 17.1552 | -0.58518114 | 5.84E-12    |    |
| siR_127713 | 6.7      | 10.4423 | 0.64020651  | 1.95E-06    |    |
| siR_127740 | 1.0989   | 2.3122  | 1.07320609  | 0.000522477 | ** |
| siR_127743 | 5.1757   | 4.5126  | -0.19779509 | 0.265831009 |    |
| siR_127753 | 1.8079   | 0.5967  | -1.5992372  | 3.50E-05    | ** |
| siR_127783 | 15.9525  | 30.2453 | 0.92292844  | 9.19E-29    |    |
| siR_127785 | 0.01     | 7.3096  | 9.51364865  | 6.33E-62    | ** |
| siR_127809 | 0.01     | 1.0442  | 6.70625425  | 1.77E-09    | ** |
| siR_12781  | 0.01     | 3.17    | 8.30833903  | 2.84E-27    | ** |
| siR_127812 | 0.01     | 21.6677 | 11.08133031 | 4.09E-182   | ** |
| siR_127818 | 0.01     | 3.1327  | 8.29126281  | 5.83E-27    | ** |
| siR_127822 | 0.01     | 2.4241  | 7.9213054   | 4.98E-21    | ** |
| siR_127823 | 0.01     | 1.8647  | 7.54279973  | 2.40E-16    | ** |
| siR_12783  | 3.3323   | 1.3799  | -1.27195457 | 2.00E-06    | ** |
| siR_127834 | 0.01     | 2.3868  | 7.89893387  | 1.02E-20    | ** |
| siR_127841 | 0.01     | 12.6426 | 10.30407747 | 1.44E-106   | ** |
| siR_127846 | 0.01     | 1.8274  | 7.51364865  | 4.92E-16    | ** |
| siR_127853 | 1.1698   | 0.7459  | -0.64920776 | 0.112106036 |    |
| siR_127868 | 1.7725   | 0.1119  | -3.98550369 | 9.72E-12    | ** |
| siR_127905 | 3.2614   | 3.5056  | 0.10417     | 0.621770128 |    |
| siR_127906 | 2.5878   | 2.4241  | -0.09427691 | 0.704679575 |    |
| siR_12792  | 2.6942   | 2.6106  | -0.04547553 | 0.851797786 |    |
| siR_127934 | 3.155    | 1.0069  | -1.6477196  | 2.02E-08    | ** |
| siR_127940 | 1.2053   | 0.0746  | -4.01407284 | 2.34E-08    | ** |
| siR_127942 | 229.7866 | 27.9331 | -3.04024707 | 0           | ** |
| siR_127943 | 4.1831   | 0.8951  | -2.22445171 | 2.68E-15    | ** |
| siR_127944 | 1.0635   | 0.1492  | -2.83350059 | 6.84E-06    | ** |
| siR_12795  | 6.9482   | 1.1561  | -2.58737309 | 6.20E-29    | ** |
| siR_127986 | 4.5021   | 0.6713  | -2.74556855 | 1.94E-20    | ** |
| siR_127990 | 0.01     | 1.6782  | 7.39077085  | 8.72E-15    | ** |
| siR_128013 | 2.5169   | 2.1258  | -0.24364203 | 0.344717819 |    |
| siR_128017 | 0.01     | 2.0885  | 7.70632333  | 3.21E-18    | ** |
| siR_12803  | 0.01     | 3.5429  | 8.46878694  | 2.15E-30    | ** |
| siR_128044 | 13.6837  | 6.3773  | -1.10144073 | 6.22E-18    | ** |
| siR_128068 | 1.3825   | 0.4848  | -1.51181788 | 0.000534972 | ** |
| siR_128077 | 1.8079   | 0.7459  | -1.27726075 | 0.000470054 | ** |
| siR_128085 | 0.01     | 1.7155  | 7.42248532  | 4.25E-15    | ** |
| siR_128090 | 0.01     | 1.0815  | 6.75688986  | 8.62E-10    | ** |
| siR_1281   | 2.9069   | 2.9835  | 0.03752433  | 0.866909787 |    |
| siR_128156 | 16.5197  | 9.137   | -0.85439503 | 1.60E-14    |    |
| siR_128165 | 4.1122   | 2.0512  | -1.00344227 | 1.24E-05    | ** |
| siR_128168 | 1.7016   | 1.6036  | -0.08557762 | 0.781632893 |    |
| siR_128174 | 0.01     | 1.4545  | 7.18437949  | 6.51E-13    | ** |
| siR_128175 | 0.01     | 1.0815  | 6.75688986  | 8.62E-10    | ** |

|            |         |         |             |             |    |
|------------|---------|---------|-------------|-------------|----|
| siR_128199 | 2.0206  | 0.5221  | -1.95238569 | 4.98E-07    | ** |
| siR_128214 | 11.9821 | 5.6314  | -1.08931524 | 1.24E-15    | ** |
| siR_128216 | 1.5243  | 2.7597  | 0.85636457  | 0.001671899 |    |
| siR_128224 | 0.01    | 1.1561  | 6.85312238  | 2.05E-10    | ** |
| siR_128228 | 0.01    | 9.6591  | 9.91574496  | 1.36E-81    | ** |
| siR_128232 | 0.01    | 2.6106  | 8.02823761  | 1.37E-22    | ** |
| siR_128233 | 0.01    | 2.4987  | 7.96503389  | 1.18E-21    | ** |
| siR_128239 | 1.9143  | 0.6713  | -1.51178739 | 4.32E-05    | ** |
| siR_128257 | 1.0989  | 0.5221  | -1.07366204 | 0.018227899 | *  |
| siR_128265 | 0.01    | 13.0156 | 10.3460261  | 1.09E-109   | ** |
| siR_128266 | 0.01    | 1.0069  | 6.6537766   | 3.63E-09    | ** |
| siR_128270 | 0.01    | 1.1188  | 6.80580835  | 4.20E-10    | ** |
| siR_12831  | 3.864   | 2.2749  | -0.76429197 | 0.000768113 |    |
| siR_128324 | 2.7651  | 1.0069  | -1.45741125 | 1.60E-06    | ** |
| siR_12834  | 7.4445  | 4.4753  | -0.73419056 | 6.23E-06    |    |
| siR_128343 | 0.01    | 4.699   | 8.87620996  | 4.51E-40    | ** |
| siR_128344 | 0.01    | 1.8274  | 7.51364865  | 4.92E-16    | ** |
| siR_128353 | 0.01    | 1.0442  | 6.70625425  | 1.77E-09    | ** |
| siR_128381 | 1.3471  | 0.3729  | -1.85299625 | 8.02E-05    | ** |
| siR_128390 | 5.9556  | 3.5802  | -0.73420668 | 5.36E-05    |    |
| siR_128414 | 1.028   | 0.5967  | -0.78476258 | 0.079326488 |    |
| siR_128435 | 0.01    | 1.9393  | 7.59939219  | 5.69E-17    | ** |
| siR_12848  | 0.01    | 1.1561  | 6.85312238  | 2.05E-10    | ** |
| siR_128511 | 0.01    | 2.4241  | 7.9213054   | 4.98E-21    | ** |
| siR_128540 | 11.8048 | 5.2584  | -1.1666778  | 4.82E-17    | ** |
| siR_128566 | 5.8492  | 1.1561  | -2.33897313 | 4.80E-22    | ** |
| siR_128568 | 1.418   | 0.0373  | -5.24853809 | 5.33E-11    | ** |
| siR_128593 | 1.6307  | 0.1119  | -3.86520945 | 1.12E-10    | ** |
| siR_128614 | 1.0635  | 0.2238  | -2.24853809 | 7.77E-05    | ** |
| siR_128651 | 3.4386  | 1.8647  | -0.88287776 | 0.000332258 |    |
| siR_128656 | 2.6233  | 0.634   | -2.04882806 | 3.13E-09    | ** |
| siR_128663 | 1.2762  | 1.5663  | 0.29550613  | 0.367785826 |    |
| siR_128669 | 1.2762  | 0.5967  | -1.09677676 | 0.009487354 | ** |
| siR_128670 | 0.01    | 1.2307  | 6.94333532  | 4.86E-11    | ** |
| siR_128672 | 51.6506 | 16.8568 | -1.61545442 | 3.46E-112   | ** |
| siR_128673 | 1.0635  | 0.3729  | -1.51195933 | 0.00248896  | ** |
| siR_128678 | 8.6852  | 2.6479  | -1.71371043 | 7.38E-22    | ** |
| siR_12868  | 0.01    | 13.3512 | 10.3827537  | 1.69E-112   | ** |
| siR_1287   | 0.01    | 1.0069  | 6.6537766   | 3.63E-09    | ** |
| siR_128746 | 7.2672  | 1.6036  | -2.18008529 | 6.21E-25    | ** |
| siR_12877  | 0.01    | 1.1934  | 6.89893387  | 9.98E-11    | ** |
| siR_128791 | 1.5952  | 1.6036  | 0.00757701  | 0.977649545 |    |
| siR_128807 | 2.3397  | 0.7086  | -1.72328019 | 6.50E-07    | ** |
| siR_128808 | 40.0584 | 10.2185 | -1.97092136 | 1.68E-114   | ** |
| siR_128817 | 1.0635  | 0.1865  | -2.5115725  | 2.49E-05    | ** |
| siR_12885  | 0.01    | 1.6036  | 7.32517051  | 3.67E-14    | ** |
| siR_128890 | 3.2968  | 0.8205  | -2.00649113 | 5.25E-11    | ** |

|            |         |         |             |             |    |
|------------|---------|---------|-------------|-------------|----|
| siR_12891  | 0.01    | 28.4552 | 11.4744766  | 6.24E-239   | ** |
| siR_12892  | 0.01    | 1.4172  | 7.14689956  | 1.34E-12    | ** |
| siR_128921 | 1.5243  | 0.5221  | -1.54574881 | 0.000215601 | ** |
| siR_12900  | 0.01    | 17.7892 | 10.79678592 | 1.20E-149   | ** |
| siR_129001 | 1.9852  | 0.634   | -1.64672961 | 9.33E-06    | ** |
| siR_129006 | 3.1905  | 1.1934  | -1.41870485 | 4.29E-07    | ** |
| siR_129014 | 5.1048  | 3.3564  | -0.60493978 | 0.001632878 |    |
| siR_129024 | 43.7807 | 43.2609 | -0.01723134 | 0.770763868 |    |
| siR_129040 | 4.6439  | 1.0069  | -2.2054165  | 1.14E-16    | ** |
| siR_129042 | 19.6747 | 5.1466  | -1.93465007 | 8.71E-56    | ** |
| siR_129043 | 2.9423  | 0.8205  | -1.84236911 | 4.82E-09    | ** |
| siR_129051 | 2.446   | 1.0069  | -1.28050399 | 4.39E-05    | ** |
| siR_129074 | 1.028   | 0.2611  | -1.9771659  | 0.000342937 | ** |
| siR_129106 | 1.7725  | 2.163   | 0.28724804  | 0.302435243 |    |
| siR_12912  | 4.6439  | 3.5802  | -0.37529672 | 0.052462789 |    |
| siR_129125 | 1.6307  | 1.3799  | -0.24092767 | 0.453762935 |    |
| siR_129134 | 0.8508  | 1.0815  | 0.34614173  | 0.386002893 |    |
| siR_129167 | 0.01    | 1.0815  | 6.75688986  | 8.62E-10    | ** |
| siR_129177 | 2.836   | 7.7571  | 1.45165987  | 6.26E-16    | ** |
| siR_129178 | 0.7799  | 3.2819  | 2.07317022  | 1.67E-11    | ** |
| siR_129199 | 0.01    | 6.7875  | 9.40673648  | 1.49E-57    | ** |
| siR_12920  | 2.9778  | 1.4545  | -1.03372356 | 0.00014156  | ** |
| siR_129202 | 0.01    | 8.3165  | 9.69983269  | 2.36E-70    | ** |
| siR_12921  | 8.4016  | 1.9393  | -2.1151281  | 1.40E-27    | ** |
| siR_129215 | 1.3825  | 1.3426  | -0.04224993 | 0.902829273 |    |
| siR_129218 | 0.01    | 1.4918  | 7.22091032  | 3.17E-13    | ** |
| siR_12922  | 4.7148  | 1.529   | -1.62460817 | 1.03E-11    | ** |
| siR_129285 | 5.8492  | 6.3027  | 0.10773067  | 0.494693151 |    |
| siR_1293   | 0.01    | 1.0442  | 6.70625425  | 1.77E-09    | ** |
| siR_129324 | 10.7059 | 3.4683  | -1.62610548 | 8.57E-25    | ** |
| siR_129325 | 1.6307  | 0.5594  | -1.54353923 | 0.00013028  | ** |
| siR_129349 | 4.7148  | 3.0581  | -0.62456099 | 0.001845008 |    |
| siR_129351 | 1.1698  | 1.1561  | -0.0169957  | 0.966012024 |    |
| siR_129367 | 0.01    | 2.4614  | 7.94333532  | 2.43E-21    | ** |
| siR_129368 | 0.01    | 1.4918  | 7.22091032  | 3.17E-13    | ** |
| siR_129372 | 0.01    | 30.6556 | 11.58193493 | 2.38E-257   | ** |
| siR_129373 | 0.01    | 7.9063  | 9.62685889  | 6.41E-67    | ** |
| siR_129374 | 0.01    | 1.3799  | 7.10841991  | 2.74E-12    | ** |
| siR_12938  | 1.1344  | 0.7459  | -0.60487531 | 0.14203681  |    |
| siR_129382 | 0.01    | 9.5472  | 9.89893387  | 1.18E-80    | ** |
| siR_129383 | 0.01    | 2.9835  | 8.22086197  | 1.03E-25    | ** |
| siR_129391 | 0.01    | 6.34    | 9.30833903  | 8.28E-54    | ** |
| siR_129392 | 0.01    | 2.0139  | 7.65384824  | 1.35E-17    | ** |
| siR_129398 | 0.01    | 55.2322 | 12.43129388 | 0           | ** |
| siR_129399 | 0.01    | 3.431   | 8.42248532  | 1.85E-29    | ** |
| siR_12940  | 1.2407  | 1.268   | 0.03140043  | 0.925522201 |    |
| siR_129408 | 76.4301 | 70.8211 | -0.10996167 | 0.015405134 |    |

|            |         |         |             |             |    |
|------------|---------|---------|-------------|-------------|----|
| siR_129418 | 10.1032 | 14.1717 | 0.48820052  | 1.42E-05    |    |
| siR_12942  | 0.9926  | 1.2307  | 0.31019477  | 0.403815445 |    |
| siR_129422 | 0.01    | 1.0815  | 6.75688986  | 8.62E-10    | ** |
| siR_129426 | 0.01    | 2.3868  | 7.89893387  | 1.02E-20    | ** |
| siR_129442 | 6.3101  | 7.3842  | 0.22677876  | 0.127863727 |    |
| siR_129460 | 4.1122  | 4.5871  | 0.15767193  | 0.39817736  |    |
| siR_129488 | 0.01    | 9.0624  | 9.82374936  | 1.35E-76    | ** |
| siR_129495 | 1.2407  | 2.163   | 0.80187935  | 0.008600553 |    |
| siR_129496 | 1.6661  | 2.9462  | 0.82238038  | 0.001701695 |    |
| siR_129501 | 2.0915  | 0.3729  | -2.4876773  | 2.81E-09    | ** |
| siR_129502 | 0.01    | 2.1258  | 7.73186206  | 1.57E-18    | ** |
| siR_129525 | 0.01    | 2.9462  | 8.20271156  | 2.12E-25    | ** |
| siR_129565 | 1.2407  | 0.5594  | -1.14920216 | 0.007946935 | ** |
| siR_129567 | 1.2762  | 0.8951  | -0.51173367 | 0.179854611 |    |
| siR_129590 | 1.9497  | 2.536   | 0.37930259  | 0.146948441 |    |
| siR_129626 | 2.0915  | 2.4614  | 0.23494113  | 0.363638014 |    |
| siR_129628 | 5.282   | 4.1023  | -0.3646513  | 0.043990409 |    |
| siR_129649 | 0.01    | 43.0371 | 12.07136515 | 0           | ** |
| siR_129659 | 0.01    | 3.431   | 8.42248532  | 1.85E-29    | ** |
| siR_12969  | 0.01    | 1.4918  | 7.22091032  | 3.17E-13    | ** |
| siR_129709 | 0.01    | 9.8083  | 9.9378593   | 7.68E-83    | ** |
| siR_129728 | 3.2259  | 2.3122  | -0.48043552 | 0.042505752 |    |
| siR_129730 | 0.01    | 1.4172  | 7.14689956  | 1.34E-12    | ** |
| siR_129785 | 1.0989  | 0.8205  | -0.42148487 | 0.29881012  |    |
| siR_129792 | 14.7472 | 12.1578 | -0.27855887 | 0.008917246 |    |
| siR_12982  | 0.01    | 6.1908  | 9.27398204  | 1.47E-52    | ** |
| siR_129843 | 0.01    | 1.6782  | 7.39077085  | 8.72E-15    | ** |
| siR_129866 | 2.0915  | 1.7901  | -0.22449782 | 0.42674654  |    |
| siR_129889 | 1.4889  | 1.1561  | -0.36498067 | 0.288568542 |    |
| siR_129936 | 10.2096 | 8.4284  | -0.27659566 | 0.030760872 |    |
| siR_129958 | 0.01    | 2.536   | 7.98641094  | 5.76E-22    | ** |
| siR_12999  | 1.2762  | 0.6713  | -0.92682489 | 0.023898405 |    |
| siR_129994 | 0.01    | 1.1934  | 6.89893387  | 9.98E-11    | ** |
| siR_13001  | 4.254   | 1.7155  | -1.31019091 | 3.75E-08    | ** |
| siR_130044 | 1.0989  | 0.2984  | -1.88074067 | 0.000335467 | ** |
| siR_130064 | 7.09    | 3.431   | -1.0471565  | 2.62E-09    | ** |
| siR_130066 | 3.6513  | 1.6782  | -1.12149555 | 6.59E-06    | ** |
| siR_130087 | 2.3397  | 1.529   | -0.61373515 | 0.031403936 |    |
| siR_130088 | 71.8571 | 30.9912 | -1.21327209 | 1.96E-101   | ** |
| siR_13012  | 0.01    | 11.5238 | 10.17040081 | 3.35E-97    | ** |
| siR_130129 | 0.01    | 1.8274  | 7.51364865  | 4.92E-16    | ** |
| siR_130190 | 1.2053  | 0.7832  | -0.62193961 | 0.120458422 |    |
| siR_130198 | 0.01    | 1.0442  | 6.70625425  | 1.77E-09    | ** |
| siR_130219 | 8.3662  | 8.3911  | 0.00428746  | 0.973302575 |    |
| siR_130229 | 0.01    | 2.0885  | 7.70632333  | 3.21E-18    | ** |
| siR_130232 | 1.4889  | 0.3356  | -2.14943224 | 4.80E-06    | ** |
| siR_130233 | 9.2879  | 2.9835  | -1.63834666 | 6.27E-22    | ** |

|            |          |         |             |             |    |
|------------|----------|---------|-------------|-------------|----|
| siR_130236 | 7.8344   | 1.7901  | -2.12978261 | 4.92E-26    | ** |
| siR_130241 | 4.0413   | 3.3937  | -0.25196041 | 0.215103016 |    |
| siR_130247 | 0.01     | 1.6782  | 7.39077085  | 8.72E-15    | ** |
| siR_130280 | 7.3736   | 10.4423 | 0.50199845  | 0.000132705 |    |
| siR_130282 | 2.6587   | 1.268   | -1.06816625 | 0.000223655 | ** |
| siR_13030  | 0.01     | 1.6409  | 7.35834351  | 1.79E-14    | ** |
| siR_130376 | 0.01     | 1.7901  | 7.48389637  | 1.01E-15    | ** |
| siR_13038  | 14.6408  | 11.3746 | -0.36417857 | 0.000789771 |    |
| siR_13039  | 7.3027   | 3.0954  | -1.23830411 | 4.79E-12    | ** |
| siR_130392 | 1.6307   | 0.9323  | -0.80662522 | 0.022857287 |    |
| siR_1304   | 0.6735   | 1.3053  | 0.95463157  | 0.018405953 |    |
| siR_13040  | 1.5952   | 1.1934  | -0.41865963 | 0.21138519  |    |
| siR_130414 | 0.01     | 1.4172  | 7.14689956  | 1.34E-12    | ** |
| siR_130415 | 0.01     | 1.0442  | 6.70625425  | 1.77E-09    | ** |
| siR_13042  | 4.8212   | 3.8413  | -0.32779764 | 0.081798361 |    |
| siR_130428 | 5.1048   | 4.0277  | -0.34189821 | 0.06238488  |    |
| siR_13043  | 2.6233   | 1.3426  | -0.96635326 | 0.000735593 |    |
| siR_13044  | 1.1344   | 0.7832  | -0.53447677 | 0.189070882 |    |
| siR_130443 | 0.01     | 3.1327  | 8.29126281  | 5.83E-27    | ** |
| siR_130453 | 0.01     | 7.7571  | 9.59937359  | 1.14E-65    | ** |
| siR_13046  | 1.5243   | 0.7086  | -1.1051035  | 0.004253135 | ** |
| siR_130460 | 0.01     | 5.333   | 9.05880352  | 2.22E-45    | ** |
| siR_130479 | 1.028    | 1.2307  | 0.25963886  | 0.48054543  |    |
| siR_130487 | 11.1667  | 8.5776  | -0.38055696 | 0.002263771 |    |
| siR_130490 | 1.418    | 1.1934  | -0.24877985 | 0.472084038 |    |
| siR_130530 | 2.8005   | 0.8578  | -1.70697121 | 6.12E-08    | ** |
| siR_130542 | 0.01     | 3.9159  | 8.61320011  | 1.62E-33    | ** |
| siR_130544 | 0.01     | 1.0442  | 6.70625425  | 1.77E-09    | ** |
| siR_130577 | 6.7709   | 3.9904  | -0.76281424 | 8.44E-06    |    |
| siR_13058  | 0.01     | 2.3868  | 7.89893387  | 1.02E-20    | ** |
| siR_130582 | 4.4312   | 1.7901  | -1.30765726 | 2.04E-08    | ** |
| siR_130609 | 56.0109  | 48.1464 | -0.21827968 | 5.35E-05    |    |
| siR_13061  | 0.01     | 7.3096  | 9.51364865  | 6.33E-62    | ** |
| siR_130611 | 10.7413  | 6.5637  | -0.7105874  | 1.30E-07    |    |
| siR_130613 | 29.6716  | 27.2618 | -0.1222019  | 0.094311115 |    |
| siR_130615 | 15.6334  | 15.7753 | 0.01303587  | 0.893559253 |    |
| siR_130619 | 9.3233   | 7.0485  | -0.40352442 | 0.003224413 |    |
| siR_130622 | 0.01     | 1.6036  | 7.32517051  | 3.67E-14    | ** |
| siR_130624 | 0.01     | 1.7155  | 7.42248532  | 4.25E-15    | ** |
| siR_130632 | 0.01     | 1.1934  | 6.89893387  | 9.98E-11    | ** |
| siR_130644 | 0.01     | 1.0442  | 6.70625425  | 1.77E-09    | ** |
| siR_130651 | 0.01     | 3.9531  | 8.62684064  | 7.90E-34    | ** |
| siR_130652 | 0.01     | 14.6938 | 10.52099183 | 9.77E-124   | ** |
| siR_130655 | 258.2529 | 99.9476 | -1.36954072 | 0           | ** |
| siR_130656 | 2.4815   | 0.9323  | -1.41234628 | 9.16E-06    | ** |
| siR_130659 | 6.0619   | 3.2073  | -0.91841075 | 7.96E-07    |    |
| siR_130662 | 1.3825   | 0.3356  | -2.04246486 | 2.03E-05    | ** |



|            |         |         |             |             |    |
|------------|---------|---------|-------------|-------------|----|
| siR_130677 | 12.0884 | 5.6314  | -1.10205777 | 4.97E-16    | ** |
| siR_130685 | 0.01    | 3.3937  | 8.40671523  | 3.81E-29    | ** |
| siR_130721 | 17.0869 | 12.8664 | -0.40928223 | 5.26E-05    |    |
| siR_130726 | 14.0027 | 15.738  | 0.16854718  | 0.095054741 |    |
| siR_130775 | 0.01    | 1.6782  | 7.39077085  | 8.72E-15    | ** |
| siR_130791 | 0.8862  | 1.0815  | 0.28732943  | 0.466872116 |    |
| siR_13083  | 0.01    | 1.4172  | 7.14689956  | 1.34E-12    | ** |
| siR_130836 | 0.01    | 1.0815  | 6.75688986  | 8.62E-10    | ** |
| siR_130851 | 0.01    | 2.0885  | 7.70632333  | 3.21E-18    | ** |
| siR_130886 | 1.2407  | 1.902   | 0.61636293  | 0.050564006 |    |
| siR_130899 | 6.0619  | 1.529   | -1.98718165 | 7.37E-19    | ** |
| siR_130909 | 17.6895 | 6.0789  | -1.54101108 | 4.62E-37    | ** |
| siR_130914 | 17.6541 | 6.0043  | -1.55593531 | 1.72E-37    | ** |
| siR_130916 | 1.1344  | 0.5221  | -1.11953137 | 0.013060942 | *  |
| siR_13097  | 1.4534  | 0.5221  | -1.47703375 | 0.000479018 | ** |
| siR_131019 | 0.01    | 1.1561  | 6.85312238  | 2.05E-10    | ** |
| siR_131022 | 0.01    | 9.9575  | 9.95963976  | 4.33E-84    | ** |
| siR_131028 | 0.01    | 1.268   | 6.98641094  | 2.37E-11    | ** |
| siR_131049 | 0.01    | 9.2489  | 9.85313798  | 3.70E-78    | ** |
| siR_131069 | 17.1932 | 7.3469  | -1.22663054 | 5.56E-26    | ** |
| siR_13111  | 0.01    | 16.9687 | 10.72866033 | 8.85E-143   | ** |
| siR_131127 | 0.01    | 1.1934  | 6.89893387  | 9.98E-11    | ** |
| siR_131157 | 1.8434  | 1.7901  | -0.04232897 | 0.886786651 |    |
| siR_131162 | 0.01    | 1.3426  | 7.06888574  | 5.63E-12    | ** |
| siR_131172 | 6.6646  | 2.4987  | -1.41534059 | 2.56E-13    | ** |
| siR_131187 | 0.01    | 4.5499  | 8.82969103  | 8.00E-39    | ** |
| siR_13120  | 0.01    | 3.3937  | 8.40671523  | 3.81E-29    | ** |
| siR_131238 | 1.418   | 1.4545  | 0.03666576  | 0.90783442  |    |
| siR_131264 | 28.4309 | 28.4552 | 0.00123255  | 0.985813719 |    |
| siR_131271 | 1.1344  | 0.2611  | -2.11925507 | 8.17E-05    | ** |
| siR_131278 | 42.0436 | 19.6539 | -1.09707059 | 1.92E-51    | ** |
| siR_131279 | 1.1698  | 0.7086  | -0.72321852 | 0.080618428 |    |
| siR_131296 | 0.01    | 2.1258  | 7.73186206  | 1.57E-18    | ** |
| siR_131298 | 0.01    | 2.9835  | 8.22086197  | 1.03E-25    | ** |
| siR_131384 | 0.01    | 4.2142  | 8.71911497  | 5.16E-36    | ** |
| siR_131442 | 4.7857  | 2.9462  | -0.69987459 | 0.000520523 |    |
| siR_131472 | 2.836   | 0.4102  | -2.78945814 | 1.44E-13    | ** |
| siR_131475 | 1.1344  | 0.1119  | -3.3416475  | 4.83E-07    | ** |
| siR_131477 | 1.9852  | 0.5594  | -1.8273322  | 1.89E-06    | ** |
| siR_131481 | 1.9497  | 0.5594  | -1.80129999 | 2.93E-06    | ** |
| siR_131483 | 2.6233  | 0.6713  | -1.96635326 | 8.01E-09    | ** |
| siR_131540 | 2.0206  | 1.6409  | -0.30029643 | 0.302251247 |    |
| siR_131551 | 6.3101  | 4.438   | -0.5077532  | 0.002773848 |    |
| siR_131560 | 0.01    | 2.2749  | 7.82965932  | 8.83E-20    | ** |
| siR_13158  | 0.01    | 1.4918  | 7.22091032  | 3.17E-13    | ** |
| siR_131582 | 5.991   | 4.7363  | -0.33903637 | 0.045062385 |    |
| siR_131607 | 1.9852  | 0.3729  | -2.41242366 | 1.32E-08    | ** |

|            |         |         |             |             |    |
|------------|---------|---------|-------------|-------------|----|
| siR_131620 | 47.5029 | 36.809  | -0.36795703 | 1.00E-09    |    |
| siR_131649 | 1.1698  | 1.0069  | -0.21634148 | 0.569256367 |    |
| siR_131653 | 1.2053  | 0.8205  | -0.55481704 | 0.161050726 |    |
| siR_131654 | 2.8005  | 2.1258  | -0.39767856 | 0.112747937 |    |
| siR_131678 | 2.836   | 1.268   | -1.16130279 | 4.53E-05    | ** |
| siR_131685 | 0.01    | 2.9089  | 8.18432989  | 4.35E-25    | ** |
| siR_13169  | 3.4386  | 0.8205  | -2.06724606 | 8.15E-12    | ** |
| siR_13171  | 0.01    | 19.3182 | 10.91574496 | 1.90E-162   | ** |
| siR_131717 | 0.01    | 1.902   | 7.57137344  | 1.17E-16    | ** |
| siR_13175  | 5.282   | 0.8951  | -2.56096353 | 4.19E-22    | ** |
| siR_131759 | 1.5598  | 0.7459  | -1.06430692 | 0.005019683 | ** |
| siR_131767 | 0.01    | 7.9809  | 9.64040764  | 1.52E-67    | ** |
| siR_131789 | 0.01    | 2.9462  | 8.20271156  | 2.12E-25    | ** |
| siR_13179  | 0.01    | 1.0069  | 6.6537766   | 3.63E-09    | ** |
| siR_131801 | 4.0413  | 1.3426  | -1.5897899  | 5.78E-10    | ** |
| siR_131847 | 0.01    | 2.8716  | 8.16571099  | 8.93E-25    | ** |
| siR_131853 | 19.4975 | 6.6383  | -1.55440342 | 3.55E-41    | ** |
| siR_131855 | 44.5606 | 12.1205 | -1.87831944 | 2.36E-119   | ** |
| siR_131860 | 1.6307  | 1.6036  | -0.02417707 | 0.940359108 |    |
| siR_13188  | 0.01    | 1.3053  | 7.02823761  | 1.15E-11    | ** |
| siR_131899 | 1.7725  | 0.2238  | -2.98550369 | 1.76E-09    | ** |
| siR_131926 | 1.1344  | 1.2307  | 0.11754969  | 0.741641213 |    |
| siR_131934 | 1.3471  | 0.634   | -1.08730221 | 0.008088456 | ** |
| siR_131935 | 7.9762  | 4.4007  | -0.85796856 | 8.82E-08    |    |
| siR_131940 | 4.7503  | 1.902   | -1.32050138 | 4.85E-09    | ** |
| siR_131948 | 2.9423  | 3.2446  | 0.14109628  | 0.523630443 |    |
| siR_131954 | 2.7296  | 1.4172  | -0.94564618 | 0.000716645 |    |
| siR_131967 | 0.01    | 5.9297  | 9.21181531  | 2.25E-50    | ** |
| siR_13197  | 1.9143  | 0.2984  | -2.6814975  | 3.18E-09    | ** |
| siR_132000 | 2.0915  | 0.3729  | -2.4876773  | 2.81E-09    | ** |
| siR_13203  | 2.8005  | 2.6106  | -0.10130301 | 0.671732766 |    |
| siR_132030 | 0.01    | 1.0442  | 6.70625425  | 1.77E-09    | ** |
| siR_132034 | 0.01    | 1.0069  | 6.6537766   | 3.63E-09    | ** |
| siR_132066 | 1.0989  | 0.634   | -0.79350536 | 0.066742311 |    |
| siR_132068 | 36.6907 | 17.5281 | -1.06574481 | 4.02E-43    | ** |
| siR_13207  | 0.01    | 3.6548  | 8.51364865  | 2.48E-31    | ** |
| siR_132074 | 2.6587  | 0.9696  | -1.45525939 | 2.62E-06    | ** |
| siR_132098 | 6.9482  | 6.4891  | -0.09862088 | 0.513227942 |    |
| siR_132101 | 3.1196  | 2.6852  | -0.21633151 | 0.347469693 |    |
| siR_132114 | 1.4534  | 0.634   | -1.19687707 | 0.002948104 | ** |
| siR_132142 | 2.5524  | 1.4545  | -0.81133114 | 0.004074322 |    |
| siR_132163 | 10.5995 | 7.3469  | -0.52878867 | 5.63E-05    |    |
| siR_132176 | 0.01    | 1.0442  | 6.70625425  | 1.77E-09    | ** |
| siR_132240 | 1.1344  | 1.3426  | 0.24310011  | 0.488682354 |    |
| siR_132241 | 1.737   | 1.268   | -0.45404301 | 0.159418817 |    |
| siR_132256 | 0.01    | 3.804   | 8.57137344  | 1.40E-32    | ** |
| siR_132258 | 0.01    | 1.3426  | 7.06888574  | 5.63E-12    | ** |

|            |           |           |             |             |    |
|------------|-----------|-----------|-------------|-------------|----|
| siR_132263 | 6.3101    | 3.804     | -0.73014562 | 3.50E-05    |    |
| siR_132343 | 1.2762    | 0.4848    | -1.39639284 | 0.001733978 | ** |
| siR_132381 | 3.0132    | 2.163     | -0.47826277 | 0.050983946 |    |
| siR_132384 | 1.3471    | 0.5221    | -1.36745889 | 0.001524084 | ** |
| siR_132410 | 1.028     | 0.4848    | -1.08437866 | 0.021479092 | *  |
| siR_132416 | 2.6587    | 1.0442    | -1.34832293 | 9.19E-06    | ** |
| siR_132417 | 17.016    | 15.9618   | -0.09226859 | 0.336663734 |    |
| siR_132443 | 3.864     | 1.8274    | -1.08030263 | 6.82E-06    | ** |
| siR_132448 | 11.2376   | 4.6617    | -1.26940588 | 2.15E-18    | ** |
| siR_132473 | 6.0265    | 4.3261    | -0.47825336 | 0.005645518 |    |
| siR_13250  | 0.01      | 1.0069    | 6.6537766   | 3.63E-09    | ** |
| siR_132506 | 1.737     | 0.4102    | -2.08219836 | 1.23E-06    | ** |
| siR_132509 | 36.5135   | 9.8456    | -1.89087893 | 5.29E-99    | ** |
| siR_132516 | 16.8033   | 4.1396    | -2.02118132 | 1.25E-50    | ** |
| siR_132518 | 1.028     | 0.0746    | -3.78452082 | 4.98E-07    | ** |
| siR_132519 | 2.6942    | 0.5967    | -2.17477927 | 4.45E-10    | ** |
| siR_132529 | 1.028     | 0.3729    | -1.46297956 | 0.003720663 | ** |
| siR_132540 | 1.028     | 0.9323    | -0.14097409 | 0.726340828 |    |
| siR_132547 | 1.028     | 0.8951    | -0.19971949 | 0.622135026 |    |
| siR_132554 | 1.1698    | 1.1934    | 0.02881579  | 0.933217474 |    |
| siR_132563 | 7.5154    | 6.0789    | -0.30603961 | 0.041457263 |    |
| siR_132566 | 0.5317    | 1.0442    | 0.97371369  | 0.032467048 |    |
| siR_132574 | 1.5952    | 0.4848    | -1.71827571 | 4.42E-05    | ** |
| siR_132577 | 2.5878    | 2.9462    | 0.18712925  | 0.424317434 |    |
| siR_132578 | 2.6942    | 2.6479    | -0.02500831 | 0.918827197 |    |
| siR_132579 | 3.2968    | 3.1327    | -0.07365975 | 0.737023679 |    |
| siR_132581 | 0.01      | 13.7987   | 10.43031664 | 3.03E-116   | ** |
| siR_132585 | 1.2053    | 0.6713    | -0.84436273 | 0.042610765 |    |
| siR_132586 | 6.1683    | 3.431     | -0.84624381 | 3.38E-06    |    |
| siR_132617 | 36.9743   | 39.8298   | 0.1073254   | 0.087409387 |    |
| siR_132618 | 1.5598    | 1.1561    | -0.43209486 | 0.203345857 |    |
| siR_13262  | 0.01      | 1.1561    | 6.85312238  | 2.05E-10    | ** |
| siR_132624 | 1473.5128 | 1128.6616 | -0.3846466  | 1.04E-275   |    |
| siR_132625 | 3.545     | 2.7597    | -0.36127418 | 0.102473296 |    |
| siR_132627 | 1.8079    | 0.5221    | -1.79191682 | 7.37E-06    | ** |
| siR_132634 | 20.1001   | 15.8126   | -0.34612808 | 0.000176317 |    |
| siR_132644 | 7.3381    | 5.5941    | -0.39150052 | 0.011103642 |    |
| siR_132647 | 6.5582    | 5.2211    | -0.32894611 | 0.041506961 |    |
| siR_13266  | 1.4889    | 1.0815    | -0.4612132  | 0.18708423  |    |
| siR_132675 | 14.0736   | 16.2601   | 0.20834472  | 0.037262755 |    |
| siR_132678 | 0.01      | 17.3789   | 10.76312105 | 3.26E-146   | ** |
| siR_132679 | 0.01      | 1.5663    | 7.29121675  | 7.54E-14    | ** |
| siR_132682 | 0.01      | 59.7821   | 12.54549786 | 0           | ** |
| siR_132683 | 0.01      | 1.7155    | 7.42248532  | 4.25E-15    | ** |
| siR_132692 | 0.01      | 51.2418   | 12.32310544 | 0           | ** |
| siR_132696 | 0.01      | 2.4614    | 7.94333532  | 2.43E-21    | ** |
| siR_132713 | 0.7799    | 1.3053    | 0.74302037  | 0.056792603 |    |

|            |         |         |             |               |    |
|------------|---------|---------|-------------|---------------|----|
| siR_132727 | 0.01    | 1.0815  | 6.75688986  | 8.62E-10      | ** |
| siR_132745 | 1.4534  | 0.6713  | -1.11440226 | 0.004972851   | ** |
| siR_132759 | 0.01    | 2.4241  | 7.9213054   | 4.98E-21      | ** |
| siR_13276  | 0.01    | 4.8482  | 8.9213054   | 2.54E-41      | ** |
| siR_132761 | 1.7725  | 0.9696  | -0.87032402 | 0.011285895   |    |
| siR_132798 | 2.9423  | 1.0815  | -1.44391069 | 8.78E-07      | ** |
| siR_132806 | 1.2053  | 0.1865  | -2.69214474 | 2.94E-06      | ** |
| siR_13285  | 0.01    | 2.7225  | 8.08878824  | 1.58E-23      | ** |
| siR_132857 | 0.01    | 1.4918  | 7.22091032  | 3.17E-13      | ** |
| siR_132860 | 0.01    | 19.5793 | 10.93511347 | 1.24E-164     | ** |
| siR_132865 | 0.01    | 36.9582 | 11.85167878 | 999845544704e | ** |
| siR_132876 | 0.01    | 18.1994 | 10.82967517 | 4.41E-153     | ** |
| siR_13289  | 1.4889  | 0.5594  | -1.4122947  | 0.000627722   | ** |
| siR_132891 | 1.8788  | 2.2003  | 0.22788874  | 0.404166138   |    |
| siR_13290  | 1.6307  | 0.4475  | -1.86553181 | 1.24E-05      | ** |
| siR_132929 | 91.709  | 46.2071 | -0.98894877 | 3.58E-93      |    |
| siR_132930 | 1.5243  | 0.5221  | -1.54574881 | 0.000215601   | ** |
| siR_132964 | 1.6307  | 0.9323  | -0.80662522 | 0.022857287   |    |
| siR_132983 | 1.028   | 1.0069  | -0.02991985 | 0.942343409   |    |
| siR_132985 | 3.6513  | 2.163   | -0.75537654 | 0.001211404   |    |
| siR_132987 | 2.5878  | 2.4241  | -0.09427691 | 0.704679575   |    |
| siR_13299  | 0.01    | 1.7528  | 7.45351758  | 2.07E-15      | ** |
| siR_133035 | 0.8862  | 1.3426  | 0.59932532  | 0.109876009   |    |
| siR_133048 | 1.5952  | 1.0442  | -0.61133925 | 0.07756025    |    |
| siR_13305  | 1.3116  | 0.7832  | -0.74387514 | 0.057586901   |    |
| siR_133056 | 1.9143  | 1.268   | -0.59426219 | 0.058982077   |    |
| siR_133072 | 0.01    | 1.6036  | 7.32517051  | 3.67E-14      | ** |
| siR_133074 | 4.4667  | 1.7901  | -1.31916918 | 1.44E-08      | ** |
| siR_133076 | 1.0989  | 0.7086  | -0.63301674 | 0.132484597   |    |
| siR_133118 | 0.01    | 3.431   | 8.42248532  | 1.85E-29      | ** |
| siR_133126 | 1.1344  | 0.3356  | -1.75711482 | 0.000500636   | ** |
| siR_133140 | 1.2762  | 0.7459  | -0.77480031 | 0.052442918   |    |
| siR_133157 | 3.545   | 0.8205  | -2.11121039 | 1.98E-12      | ** |
| siR_133158 | 1.1698  | 0.7459  | -0.64920776 | 0.112106036   |    |
| siR_133166 | 5.3884  | 6.4518  | 0.25984477  | 0.104977885   |    |
| siR_133167 | 1.6307  | 1.0069  | -0.69557098 | 0.045385302   |    |
| siR_133184 | 2.0206  | 1.0069  | -1.00486334 | 0.002256209   | ** |
| siR_133200 | 0.01    | 7.4215  | 9.535567    | 7.33E-63      | ** |
| siR_13323  | 1.1698  | 2.2376  | 0.93569026  | 0.002312179   |    |
| siR_133246 | 2.5524  | 1.0069  | -1.34193403 | 1.50E-05      | ** |
| siR_13326  | 4.573   | 1.9766  | -1.21011997 | 8.15E-08      | ** |
| siR_133274 | 5.0339  | 4.3634  | -0.20622382 | 0.253309877   |    |
| siR_13328  | 0.6026  | 1.0069  | 0.74064783  | 0.096019738   |    |
| siR_13329  | 0.01    | 2.0512  | 7.68032436  | 6.59E-18      | ** |
| siR_133294 | 0.01    | 2.0512  | 7.68032436  | 6.59E-18      | ** |
| siR_133299 | 1.9852  | 0.9323  | -1.09041819 | 0.001214381   | ** |
| siR_133300 | 13.6837 | 6.0789  | -1.17057619 | 1.30E-19      | ** |

|            |         |         |             |             |    |
|------------|---------|---------|-------------|-------------|----|
| siR_133335 | 0.01    | 1.0069  | 6.6537766   | 3.63E-09    | ** |
| siR_13334  | 0.01    | 1.0442  | 6.70625425  | 1.77E-09    | ** |
| siR_133340 | 2.4106  | 1.1934  | -1.0143146  | 0.000761628 | ** |
| siR_133342 | 3.6868  | 1.2307  | -1.58289003 | 3.70E-09    | ** |
| siR_133350 | 0.01    | 13.836  | 10.4342112  | 1.48E-116   | ** |
| siR_133353 | 0.01    | 1.9766  | 7.62687714  | 2.78E-17    | ** |
| siR_133378 | 2.9069  | 3.0208  | 0.05544923  | 0.804824471 |    |
| siR_133385 | 0.01    | 1.0815  | 6.75688986  | 8.62E-10    | ** |
| siR_133397 | 0.01    | 1.1561  | 6.85312238  | 2.05E-10    | ** |
| siR_133423 | 10.8831 | 3.3564  | -1.697103   | 1.18E-26    | ** |
| siR_133433 | 1.9143  | 1.6782  | -0.18990228 | 0.518337304 |    |
| siR_133448 | 0.01    | 1.4172  | 7.14689956  | 1.34E-12    | ** |
| siR_133467 | 0.01    | 1.9393  | 7.59939219  | 5.69E-17    | ** |
| siR_133477 | 2.0206  | 0.8951  | -1.17466298 | 0.000528718 | ** |
| siR_133486 | 0.01    | 3.6175  | 8.49884921  | 5.10E-31    | ** |
| siR_133493 | 3.2614  | 2.0885  | -0.64302425 | 0.007956599 |    |
| siR_133501 | 17.5123 | 8.8759  | -0.98040326 | 6.92E-19    |    |
| siR_133502 | 2.3042  | 1.268   | -0.8617112  | 0.004090052 |    |
| siR_133503 | 1.6661  | 0.6713  | -1.31144545 | 0.00061799  | ** |
| siR_13351  | 4.9275  | 1.4918  | -1.72380174 | 4.03E-13    | ** |
| siR_133522 | 0.01    | 1.9766  | 7.62687714  | 2.78E-17    | ** |
| siR_133534 | 1.418   | 1.2307  | -0.2043784  | 0.551985968 |    |
| siR_133540 | 2.6233  | 2.2376  | -0.22943064 | 0.362571311 |    |
| siR_133546 | 2.7296  | 5.1093  | 0.9044361   | 7.20E-06    |    |
| siR_133548 | 1.1698  | 2.0139  | 0.78373015  | 0.012964318 |    |
| siR_133549 | 1.1344  | 0.5967  | -0.92685176 | 0.033495577 |    |
| siR_13356  | 0.01    | 12.5307 | 10.29125129 | 1.25E-105   | ** |
| siR_133575 | 0.01    | 1.0069  | 6.6537766   | 3.63E-09    | ** |
| siR_133578 | 3.3677  | 1.1934  | -1.49668594 | 6.40E-08    | ** |
| siR_133579 | 1.6661  | 0.5594  | -1.57452284 | 8.69E-05    | ** |
| siR_133601 | 0.01    | 1.1188  | 6.80580835  | 4.20E-10    | ** |
| siR_133624 | 3.1196  | 1.7155  | -0.86273193 | 0.000807486 |    |
| siR_133625 | 1.1698  | 1.0442  | -0.16386383 | 0.664155115 |    |
| siR_133626 | 1.5598  | 1.1934  | -0.38628337 | 0.251737362 |    |
| siR_133659 | 3.9704  | 5.9297  | 0.57867476  | 0.00106155  |    |
| siR_133683 | 1.0635  | 0.2611  | -2.02614567 | 0.000213675 | ** |
| siR_133685 | 2.0561  | 1.3426  | -0.61488089 | 0.043498913 |    |
| siR_13369  | 2.1979  | 1.529   | -0.52353734 | 0.070846062 |    |
| siR_133714 | 0.01    | 1.5663  | 7.29121675  | 7.54E-14    | ** |
| siR_133717 | 0.01    | 2.0885  | 7.70632333  | 3.21E-18    | ** |
| siR_133729 | 6.0619  | 2.5733  | -1.23615039 | 3.27E-10    | ** |
| siR_133736 | 1.4889  | 0.5594  | -1.4122947  | 0.000627722 | ** |
| siR_133751 | 1.2762  | 0.3729  | -1.77499374 | 0.000195629 | ** |
| siR_133764 | 3.2968  | 2.797   | -0.23718611 | 0.29116921  |    |
| siR_133768 | 1.5598  | 1.3799  | -0.17679734 | 0.587407247 |    |
| siR_133778 | 7.0545  | 5.2211  | -0.43419004 | 0.006132924 |    |
| siR_133781 | 0.01    | 2.7597  | 8.10836763  | 7.72E-24    | ** |

|            |         |         |             |             |    |
|------------|---------|---------|-------------|-------------|----|
| siR_133782 | 0.01    | 1.0069  | 6.6537766   | 3.63E-09    | ** |
| siR_133812 | 0.01    | 1.529   | 7.2564446   | 1.55E-13    | ** |
| siR_133826 | 3.545   | 0.8951  | -1.98566485 | 1.35E-11    | ** |
| siR_133834 | 2.836   | 1.4172  | -1.00081416 | 0.000300085 | ** |
| siR_133837 | 1.9143  | 0.7832  | -1.28936427 | 0.000286776 | ** |
| siR_133842 | 1.2762  | 0.4475  | -1.51189485 | 0.000890445 | ** |
| siR_133843 | 2.0206  | 0.4848  | -2.05932215 | 1.94E-07    | ** |
| siR_13386  | 1.8079  | 0.8205  | -1.13973964 | 0.001387975 | ** |
| siR_13387  | 1.0635  | 0.9323  | -0.18995386 | 0.633240136 |    |
| siR_13390  | 1.2053  | 1.0442  | -0.20699422 | 0.579823032 |    |
| siR_133936 | 3.8286  | 1.3799  | -1.47225322 | 1.20E-08    | ** |
| siR_133938 | 4.5021  | 1.3426  | -1.74556855 | 2.70E-12    | ** |
| siR_13395  | 1.4534  | 0.7459  | -0.96237768 | 0.012720128 |    |
| siR_133964 | 1.737   | 0.5594  | -1.63464559 | 3.81E-05    | ** |
| siR_133967 | 0.01    | 3.1327  | 8.29126281  | 5.83E-27    | ** |
| siR_133980 | 0.01    | 2.2749  | 7.82965932  | 8.83E-20    | ** |
| siR_134001 | 1.3471  | 0.7832  | -0.78240428 | 0.044337712 |    |
| siR_134017 | 2.2333  | 1.3426  | -0.73414751 | 0.013813394 |    |
| siR_13403  | 42.8944 | 12.2697 | -1.80568934 | 4.88E-109   | ** |
| siR_134031 | 1.3825  | 0.5594  | -1.30532732 | 0.001931693 | ** |
| siR_13405  | 35.2018 | 24.614  | -0.51617007 | 6.56E-13    |    |
| siR_134057 | 1.9143  | 0.5967  | -1.68173926 | 1.01E-05    | ** |
| siR_134093 | 1.9852  | 1.6036  | -0.30797004 | 0.295094924 |    |
| siR_134102 | 6.5937  | 3.804   | -0.793571   | 5.43E-06    |    |
| siR_134104 | 1.9852  | 1.6409  | -0.27479704 | 0.34752506  |    |
| siR_134127 | 94.7223 | 42.0675 | -1.17099803 | 6.19E-126   | ** |
| siR_134129 | 34.4574 | 8.1674  | -2.07686506 | 1.35E-105   | ** |
| siR_134132 | 1.5598  | 0.4475  | -1.80140147 | 3.03E-05    | ** |
| siR_134139 | 0.01    | 1.8274  | 7.51364865  | 4.92E-16    | ** |
| siR_134142 | 1.1698  | 0.8205  | -0.51168666 | 0.199636034 |    |
| siR_134144 | 4.1831  | 14.47   | 1.79042053  | 7.23E-38    | ** |
| siR_134156 | 29.4589 | 17.5281 | -0.74903394 | 5.12E-20    |    |
| siR_134159 | 4.9984  | 4.4753  | -0.15948196 | 0.374969616 |    |
| siR_134167 | 0.01    | 1.3799  | 7.10841991  | 2.74E-12    | ** |
| siR_13417  | 15.8461 | 3.17    | -2.32157307 | 1.31E-56    | ** |
| siR_134174 | 0.01    | 32.4457 | 11.66381158 | 2.47E-272   | ** |
| siR_134187 | 0.01    | 81.8227 | 12.99828543 | 0           | ** |
| siR_134192 | 16.8387 | 13.9106 | -0.27559611 | 0.005663015 |    |
| siR_134193 | 2.7296  | 1.1188  | -1.28673739 | 1.45E-05    | ** |
| siR_134200 | 1.1344  | 0.4475  | -1.34196985 | 0.004230483 | ** |
| siR_134214 | 1.028   | 0.4102  | -1.32544087 | 0.007079856 | ** |
| siR_134223 | 25.3467 | 11.1136 | -1.18947171 | 7.83E-36    | ** |
| siR_134228 | 2.9423  | 2.3495  | -0.32459058 | 0.178997499 |    |
| siR_134237 | 1.5952  | 0.8578  | -0.89502409 | 0.013930477 |    |
| siR_13424  | 3.1905  | 1.6409  | -0.95929521 | 0.000211766 |    |
| siR_134246 | 4.7857  | 1.529   | -1.64614156 | 4.55E-12    | ** |
| siR_134247 | 1.3116  | 0.2984  | -2.13600837 | 1.97E-05    | ** |

|            |         |         |             |             |    |
|------------|---------|---------|-------------|-------------|----|
| siR_134252 | 9.7133  | 3.17    | -1.61547868 | 1.93E-22    | ** |
| siR_134255 | 1.6307  | 1.1188  | -0.54353923 | 0.108335711 |    |
| siR_134262 | 3.9349  | 1.4172  | -1.4732836  | 7.39E-09    | ** |
| siR_134296 | 0.01    | 2.4241  | 7.9213054   | 4.98E-21    | ** |
| siR_134338 | 0.01    | 2.2749  | 7.82965932  | 8.83E-20    | ** |
| siR_13434  | 1.0989  | 0.3729  | -1.5591994  | 0.001653799 | ** |
| siR_134349 | 0.01    | 6.4891  | 9.34187459  | 4.67E-55    | ** |
| siR_134351 | 3.2614  | 1.8274  | -0.83569893 | 0.000853798 |    |
| siR_134354 | 2.446   | 0.8578  | -1.51171118 | 3.61E-06    | ** |
| siR_134373 | 0.01    | 6.0789  | 9.24766648  | 1.27E-51    | ** |
| siR_134398 | 4.254   | 1.4172  | -1.58577666 | 2.19E-10    | ** |
| siR_1344   | 1.1698  | 0.8205  | -0.51168666 | 0.199636034 |    |
| siR_134404 | 3.4032  | 1.1561  | -1.55762575 | 2.18E-08    | ** |
| siR_134405 | 1.8788  | 0.8205  | -1.19523626 | 0.000709281 | ** |
| siR_134415 | 4.3958  | 2.0512  | -1.09965758 | 1.11E-06    | ** |
| siR_134440 | 0.01    | 11.3746 | 10.1516001  | 5.94E-96    | ** |
| siR_134442 | 0.01    | 1.9393  | 7.59939219  | 5.69E-17    | ** |
| siR_134449 | 0.01    | 2.3868  | 7.89893387  | 1.02E-20    | ** |
| siR_134456 | 0.01    | 1.902   | 7.57137344  | 1.17E-16    | ** |
| siR_134460 | 0.5672  | 1.3799  | 1.28263428  | 0.002097694 | ** |
| siR_134465 | 0.01    | 3.7667  | 8.55715732  | 2.87E-32    | ** |
| siR_13449  | 2.8714  | 1.6782  | -0.77483966 | 0.003387318 |    |
| siR_134490 | 0.01    | 1.268   | 6.98641094  | 2.37E-11    | ** |
| siR_13450  | 1.3471  | 0.6713  | -1.0048274  | 0.013015658 | *  |
| siR_134503 | 1.1344  | 0.4848  | -1.22646783 | 0.007625228 | ** |
| siR_134513 | 0.01    | 3.7294  | 8.54279973  | 5.90E-32    | ** |
| siR_134522 | 1.737   | 1.4545  | -0.25607446 | 0.411890801 |    |
| siR_134558 | 1.4534  | 0.3729  | -1.96257111 | 2.04E-05    | ** |
| siR_13459  | 0.01    | 3.0208  | 8.23878686  | 5.04E-26    | ** |
| siR_134600 | 0.01    | 2.4241  | 7.9213054   | 4.98E-21    | ** |
| siR_134603 | 0.01    | 16.8195 | 10.7159191  | 1.57E-141   | ** |
| siR_134633 | 1.028   | 0.9696  | -0.08437866 | 0.833764704 |    |
| siR_134646 | 0.01    | 2.0139  | 7.65384824  | 1.35E-17    | ** |
| siR_134654 | 9.3588  | 6.1908  | -0.5961977  | 2.48E-05    |    |
| siR_134660 | 2.1979  | 1.3426  | -0.7110962  | 0.017550951 |    |
| siR_13467  | 0.01    | 16.7822 | 10.71271614 | 3.22E-141   | ** |
| siR_134694 | 1.3825  | 0.6713  | -1.04224993 | 0.00950628  | ** |
| siR_134722 | 1.6661  | 0.634   | -1.39392025 | 0.000335186 | ** |
| siR_134723 | 1.3471  | 0.4475  | -1.58989736 | 0.000394142 | ** |
| siR_134736 | 0.01    | 1.8274  | 7.51364865  | 4.92E-16    | ** |
| siR_134740 | 0.01    | 2.0139  | 7.65384824  | 1.35E-17    | ** |
| siR_134758 | 8.0826  | 5.967   | -0.43781367 | 0.003106554 |    |
| siR_134774 | 4.5376  | 2.4987  | -0.86075174 | 5.36E-05    |    |
| siR_134779 | 0.01    | 1.268   | 6.98641094  | 2.37E-11    | ** |
| siR_134788 | 19.0012 | 4.1769  | -2.18558602 | 7.65E-63    | ** |
| siR_134815 | 19.9938 | 18.3113 | -0.12681848 | 0.154577827 |    |
| siR_134820 | 30.7351 | 20.437  | -0.58870374 | 3.92E-14    |    |

|            |         |         |             |             |    |
|------------|---------|---------|-------------|-------------|----|
| siR_134847 | 2.7296  | 3.6175  | 0.40630347  | 0.06455106  |    |
| siR_13486  | 5.3529  | 3.0954  | -0.79019485 | 4.50E-05    |    |
| siR_134870 | 0.01    | 3.3564  | 8.39077085  | 7.81E-29    | ** |
| siR_134884 | 1.0635  | 0.8205  | -0.37424479 | 0.360625484 |    |
| siR_134894 | 0.01    | 1.4918  | 7.22091032  | 3.17E-13    | ** |
| siR_134896 | 1.028   | 0.7832  | -0.39238759 | 0.347659208 |    |
| siR_134897 | 1.2407  | 1.1934  | -0.05607663 | 0.877900267 |    |
| siR_13495  | 0.01    | 3.0581  | 8.25649177  | 2.46E-26    | ** |
| siR_134961 | 0.01    | 3.0581  | 8.25649177  | 2.46E-26    | ** |
| siR_134968 | 0.01    | 14.9175 | 10.54279006 | 1.31E-125   | ** |
| siR_134969 | 0.01    | 3.7294  | 8.54279973  | 5.90E-32    | ** |
| siR_134970 | 0.01    | 1.9393  | 7.59939219  | 5.69E-17    | ** |
| siR_134972 | 0.01    | 70.56   | 12.78463485 | 0           | ** |
| siR_134973 | 0.01    | 4.5871  | 8.84143855  | 3.90E-39    | ** |
| siR_134974 | 0.01    | 1.268   | 6.98641094  | 2.37E-11    | ** |
| siR_13498  | 0.4608  | 1.0069  | 1.12770779  | 0.017995871 | *  |
| siR_134985 | 0.01    | 22.7493 | 11.15160644 | 3.62E-191   | ** |
| siR_134986 | 0.01    | 1.3799  | 7.10841991  | 2.74E-12    | ** |
| siR_134991 | 0.01    | 2.3868  | 7.89893387  | 1.02E-20    | ** |
| siR_134997 | 0.01    | 2.4987  | 7.96503389  | 1.18E-21    | ** |
| siR_134998 | 0.01    | 1.3053  | 7.02823761  | 1.15E-11    | ** |
| siR_135023 | 2.6233  | 1.9393  | -0.4358468  | 0.094845979 |    |
| siR_135027 | 2.4815  | 2.163   | -0.19817879 | 0.4422645   |    |
| siR_135042 | 3.1905  | 1.7528  | -0.86412114 | 0.000691001 |    |
| siR_135053 | 1.0635  | 0.5594  | -0.92686787 | 0.039728581 |    |
| siR_135078 | 4.9984  | 3.2073  | -0.64010705 | 0.001045453 |    |
| siR_135084 | 7.3027  | 5.4822  | -0.413675   | 0.007668051 |    |
| siR_135105 | 1.5952  | 3.3937  | 1.08912172  | 2.04E-05    | ** |
| siR_135117 | 39.314  | 16.7822 | -1.22811131 | 2.25E-57    | ** |
| siR_135120 | 18.3276 | 6.2654  | -1.54853935 | 1.33E-38    | ** |
| siR_135125 | 1.0635  | 0.634   | -0.74626529 | 0.087380955 |    |
| siR_135127 | 3.0132  | 1.1561  | -1.38203024 | 1.47E-06    | ** |
| siR_135142 | 1.1698  | 1.3426  | 0.19876765  | 0.567969601 |    |
| siR_135162 | 0.01    | 1.4918  | 7.22091032  | 3.17E-13    | ** |
| siR_13518  | 0.01    | 1.4918  | 7.22091032  | 3.17E-13    | ** |
| siR_13519  | 21.979  | 15.6634 | -0.48872834 | 6.58E-08    |    |
| siR_135210 | 0.01    | 1.7155  | 7.42248532  | 4.25E-15    | ** |
| siR_135215 | 1.9497  | 0.8578  | -1.18453893 | 0.00061254  | ** |
| siR_13525  | 1.3825  | 0.4848  | -1.51181788 | 0.000534972 | ** |
| siR_135257 | 0.01    | 2.163   | 7.75688986  | 7.63E-19    | ** |
| siR_13529  | 2.7651  | 0.7459  | -1.89027752 | 7.88E-09    | ** |
| siR_135305 | 0.01    | 3.7294  | 8.54279973  | 5.90E-32    | ** |
| siR_135353 | 1.5243  | 1.3426  | -0.18311732 | 0.578885383 |    |
| siR_135354 | 1.0635  | 0.6713  | -0.66379049 | 0.122925287 |    |
| siR_135398 | 0.01    | 1.4172  | 7.14689956  | 1.34E-12    | ** |
| siR_135401 | 0.01    | 1.3426  | 7.06888574  | 5.63E-12    | ** |
| siR_135457 | 1.8434  | 0.4848  | -1.92690755 | 1.98E-06    | ** |



|            |         |         |             |             |    |
|------------|---------|---------|-------------|-------------|----|
| siR_135463 | 0.01    | 1.6409  | 7.35834351  | 1.79E-14    | ** |
| siR_135498 | 1.0989  | 1.4545  | 0.40446319  | 0.244629409 |    |
| siR_135507 | 0.01    | 2.3122  | 7.85312238  | 4.30E-20    | ** |
| siR_135525 | 0.01    | 1.9766  | 7.62687714  | 2.78E-17    | ** |
| siR_135540 | 1.1698  | 0.8578  | -0.44754867 | 0.256675186 |    |
| siR_135564 | 3.6868  | 0.7832  | -2.23491649 | 1.03E-13    | ** |
| siR_135600 | 1.8788  | 2.2749  | 0.27599163  | 0.308606529 |    |
| siR_135607 | 2.6942  | 0.3729  | -2.85299625 | 3.17E-13    | ** |
| siR_13562  | 0.6026  | 1.4545  | 1.27125072  | 0.001703177 | ** |
| siR_13563  | 19.2493 | 6.974   | -1.46474771 | 2.10E-37    | ** |
| siR_135648 | 4.0058  | 2.0885  | -0.93962325 | 4.42E-05    |    |
| siR_135652 | 2.0561  | 1.0442  | -0.97751237 | 0.002596476 |    |
| siR_135659 | 2.0206  | 0.8205  | -1.30020851 | 0.000175091 | ** |
| siR_13567  | 22.0144 | 9.6218  | -1.19406881 | 1.61E-31    | ** |
| siR_135683 | 2.5169  | 4.2515  | 0.75632404  | 0.000447061 |    |
| siR_135695 | 2.9423  | 2.797   | -0.0730641  | 0.753399508 |    |
| siR_135696 | 3.6513  | 2.5733  | -0.50479055 | 0.023856819 |    |
| siR_135700 | 0.01    | 4.9228  | 8.94333532  | 6.04E-42    | ** |
| siR_135711 | 1.8788  | 1.1561  | -0.70054531 | 0.030426223 |    |
| siR_135715 | 0.01    | 3.9159  | 8.61320011  | 1.62E-33    | ** |
| siR_135720 | 1.737   | 0.8578  | -1.01788453 | 0.004258923 | ** |
| siR_135733 | 0.01    | 1.7901  | 7.48389637  | 1.01E-15    | ** |
| siR_13575  | 2.9069  | 0.8578  | -1.76076822 | 1.71E-08    | ** |
| siR_135764 | 1.7016  | 1.6782  | -0.01997728 | 0.949958284 |    |
| siR_135795 | 0.01    | 1.3799  | 7.10841991  | 2.74E-12    | ** |
| siR_135812 | 0.01    | 27.4856 | 11.42446026 | 8.16E-231   | ** |
| siR_135816 | 0.01    | 2.6479  | 8.04870483  | 6.67E-23    | ** |
| siR_135828 | 0.01    | 1.0442  | 6.70625425  | 1.77E-09    | ** |
| siR_135833 | 0.01    | 1.7155  | 7.42248532  | 4.25E-15    | ** |
| siR_135842 | 1.0635  | 0.5594  | -0.92686787 | 0.039728581 |    |
| siR_13585  | 9.6069  | 1.9393  | -2.30853497 | 1.01E-34    | ** |
| siR_135858 | 1.0989  | 0.9323  | -0.23719393 | 0.547017649 |    |
| siR_135874 | 0.01    | 1.1561  | 6.85312238  | 2.05E-10    | ** |
| siR_135878 | 1.028   | 0.8205  | -0.32526503 | 0.431150137 |    |
| siR_135895 | 0.01    | 3.17    | 8.30833903  | 2.84E-27    | ** |
| siR_13593  | 4.1476  | 2.9462  | -0.4934214  | 0.018289446 |    |
| siR_135946 | 1.5243  | 0.5967  | -1.35306919 | 0.000806564 | ** |
| siR_135971 | 1.4534  | 1.529   | 0.0731566   | 0.816797984 |    |
| siR_135974 | 0.01    | 2.4241  | 7.9213054   | 4.98E-21    | ** |
| siR_135980 | 0.01    | 23.3087 | 11.18665283 | 7.52E-196   | ** |
| siR_136002 | 1.4534  | 0.634   | -1.19687707 | 0.002948104 | ** |
| siR_13601  | 19.4975 | 10.7033 | -0.86523348 | 3.34E-17    |    |
| siR_136054 | 17.4059 | 7.5707  | -1.20107781 | 1.77E-25    | ** |
| siR_136069 | 0.01    | 5.2584  | 9.03848008  | 9.36E-45    | ** |
| siR_136072 | 0.01    | 1.0069  | 6.6537766   | 3.63E-09    | ** |
| siR_136091 | 20.0647 | 21.7423 | 0.11584498  | 0.173448987 |    |
| siR_136095 | 3.8286  | 3.2819  | -0.22228566 | 0.284773459 |    |

|            |        |         |             |             |    |
|------------|--------|---------|-------------|-------------|----|
| siR_136106 | 0.01   | 3.6548  | 8.51364865  | 2.48E-31    | ** |
| siR_136110 | 5.6365 | 4.1769  | -0.43236699 | 0.014737092 |    |
| siR_136114 | 6.9127 | 3.1327  | -1.1418427  | 2.88E-10    | ** |
| siR_136163 | 6.5937 | 3.0581  | -1.10845267 | 1.83E-09    | ** |
| siR_136164 | 1.3116 | 0.8578  | -0.61261459 | 0.109565176 |    |
| siR_136187 | 1.7016 | 1.8274  | 0.10290052  | 0.724428689 |    |
| siR_136205 | 0.01   | 2.1258  | 7.73186206  | 1.57E-18    | ** |
| siR_136207 | 0.01   | 8.7641  | 9.77546214  | 4.23E-74    | ** |
| siR_136242 | 1.2762 | 0.8205  | -0.6372792  | 0.102225329 |    |
| siR_136257 | 0.01   | 27.6348 | 11.43227046 | 4.60E-232   | ** |
| siR_136260 | 0.01   | 6.7129  | 9.39079234  | 6.26E-57    | ** |
| siR_136264 | 0.01   | 1.4172  | 7.14689956  | 1.34E-12    | ** |
| siR_13627  | 0.01   | 1.4918  | 7.22091032  | 3.17E-13    | ** |
| siR_136286 | 0.01   | 9.4726  | 9.88761665  | 4.95E-80    | ** |
| siR_136289 | 0.01   | 1.7528  | 7.45351758  | 2.07E-15    | ** |
| siR_13629  | 3.2614 | 2.8343  | -0.20249892 | 0.367415448 |    |
| siR_136307 | 0.5317 | 1.0442  | 0.97371369  | 0.032467048 |    |
| siR_136343 | 0.01   | 1.1188  | 6.80580835  | 4.20E-10    | ** |
| siR_136344 | 0.01   | 1.1934  | 6.89893387  | 9.98E-11    | ** |
| siR_136364 | 0.01   | 1.0069  | 6.6537766   | 3.63E-09    | ** |
| siR_136375 | 1.8788 | 1.4172  | -0.40676813 | 0.185934578 |    |
| siR_136380 | 2.4106 | 5.1466  | 1.09422738  | 1.34E-07    | ** |
| siR_136407 | 2.2333 | 0.4848  | -2.20371546 | 1.09E-08    | ** |
| siR_136441 | 0.01   | 5.7433  | 9.16573611  | 8.19E-49    | ** |
| siR_136442 | 0.01   | 1.5663  | 7.29121675  | 7.54E-14    | ** |
| siR_136443 | 0.01   | 1.2307  | 6.94333532  | 4.86E-11    | ** |
| siR_136471 | 0.01   | 10.405  | 10.02306125 | 7.77E-88    | ** |
| siR_136475 | 0.01   | 7.4961  | 9.54999639  | 1.74E-63    | ** |
| siR_136486 | 1.1698 | 0.3729  | -1.64940119 | 0.000716423 | ** |
| siR_1365   | 2.3397 | 1.9393  | -0.27078756 | 0.313838403 |    |
| siR_136501 | 0.01   | 9.1743  | 9.84145427  | 1.56E-77    | ** |
| siR_136505 | 37.896 | 37.7414 | -0.00589764 | 0.926343309 |    |
| siR_136507 | 2.4106 | 5.4076  | 1.16559616  | 1.28E-08    | ** |
| siR_136520 | 0.01   | 5.6314  | 9.13734982  | 7.07E-48    | ** |
| siR_136525 | 0.01   | 2.2376  | 7.80580835  | 1.81E-19    | ** |
| siR_136544 | 1.5952 | 2.0139  | 0.33625473  | 0.248549433 |    |
| siR_136547 | 0.01   | 2.7225  | 8.08878824  | 1.58E-23    | ** |
| siR_136554 | 0.01   | 6.601   | 9.36654079  | 5.41E-56    | ** |
| siR_136558 | 1.6307 | 1.3053  | -0.32110997 | 0.324401041 |    |
| siR_136566 | 0.01   | 1.6036  | 7.32517051  | 3.67E-14    | ** |
| siR_136590 | 1.3471 | 0.7832  | -0.78240428 | 0.044337712 |    |
| siR_136593 | 0.01   | 1.6409  | 7.35834351  | 1.79E-14    | ** |
| siR_136607 | 0.01   | 7.3096  | 9.51364865  | 6.33E-62    | ** |
| siR_136608 | 0.01   | 3.17    | 8.30833903  | 2.84E-27    | ** |
| siR_13662  | 9.1106 | 2.3868  | -1.93246839 | 1.18E-26    | ** |
| siR_13663  | 1.2407 | 0.3729  | -1.73429361 | 0.000303178 | ** |
| siR_136638 | 0.01   | 9.7337  | 9.9268445   | 3.23E-82    | ** |

|            |           |           |              |              |    |
|------------|-----------|-----------|--------------|--------------|----|
| siR_13665  | 1. 1698   | 0. 2611   | -2. 16358753 | 5. 01E-05    | ** |
| siR_13667  | 1. 1698   | 0. 4848   | -1. 27080029 | 0. 005319168 | ** |
| siR_136675 | 0. 01     | 2. 5733   | 8. 00747585  | 2. 81E-22    | ** |
| siR_13668  | 1. 2407   | 0. 5594   | -1. 14920216 | 0. 007946935 | ** |
| siR_136727 | 2. 2333   | 1. 4172   | -0. 65613369 | 0. 025700044 |    |
| siR_136729 | 1. 3471   | 0. 6713   | -1. 0048274  | 0. 013015658 | *  |
| siR_136740 | 205. 9642 | 205. 0417 | -0. 00647625 | 0. 811666399 |    |
| siR_136741 | 0. 5317   | 1. 1188   | 1. 07326779  | 0. 016430396 | *  |
| siR_136751 | 0. 9926   | 1. 3053   | 0. 39509706  | 0. 28096077  |    |
| siR_136769 | 2. 1979   | 1. 8274   | -0. 26633329 | 0. 336900282 |    |
| siR_136771 | 0. 01     | 7. 4588   | 9. 54279973  | 3. 57E-63    | ** |
| siR_136776 | 1. 9143   | 0. 7086   | -1. 43377357 | 8. 42E-05    | ** |
| siR_136782 | 1. 028    | 0. 4848   | -1. 08437866 | 0. 021479092 | *  |
| siR_136802 | 1. 2407   | 1. 4918   | 0. 26589982  | 0. 42673041  |    |
| siR_136807 | 2. 8005   | 1. 1561   | -1. 27641824 | 1. 27E-05    | ** |
| siR_136808 | 1. 2762   | 0. 2611   | -2. 28918008 | 1. 13E-05    | ** |
| siR_136815 | 0. 01     | 11. 9713  | 10. 22536411 | 6. 01E-101   | ** |
| siR_136816 | 0. 01     | 1. 1934   | 6. 89893387  | 9. 98E-11    | ** |
| siR_136831 | 1. 1344   | 0. 634    | -0. 83937469 | 0. 050540314 |    |
| siR_136853 | 0. 01     | 4. 1396   | 8. 69334756  | 2. 17E-35    | ** |
| siR_136854 | 15. 3498  | 8. 7268   | -0. 81469522 | 1. 18E-12    |    |
| siR_136861 | 0. 01     | 16. 2228  | 10. 66380713 | 1. 55E-136   | ** |
| siR_136865 | 0. 01     | 1. 7528   | 7. 45351758  | 2. 07E-15    | ** |
| siR_136875 | 2. 9069   | 1. 7528   | -0. 72982005 | 0. 005125349 |    |
| siR_136879 | 8. 2953   | 3. 3937   | -1. 28943512 | 2. 85E-14    | ** |
| siR_136883 | 0. 01     | 1. 3799   | 7. 10841991  | 2. 74E-12    | ** |
| siR_136884 | 2. 9778   | 1. 8274   | -0. 7044544  | 0. 006013008 |    |
| siR_136938 | 2. 9423   | 1. 0069   | -1. 54702394 | 2. 29E-07    | ** |
| siR_136943 | 73. 5941  | 30. 208   | -1. 28465944 | 2. 21E-113   | ** |
| siR_136963 | 15. 1726  | 5. 4449   | -1. 47849087 | 3. 21E-30    | ** |
| siR_136969 | 2. 127    | 0. 8578   | -1. 31010681 | 0. 000106976 | ** |
| siR_136977 | 1. 3825   | 1. 3053   | -0. 08289806 | 0. 80935799  |    |
| siR_136980 | 1. 4534   | 0. 5221   | -1. 47703375 | 0. 000479018 | ** |
| siR_136995 | 1. 0989   | 0. 5594   | -0. 97410795 | 0. 02925074  |    |
| siR_137001 | 2. 9778   | 0. 9323   | -1. 67538069 | 3. 53E-08    | ** |
| siR_137005 | 1. 0635   | 0. 3729   | -1. 51195933 | 0. 00248896  | ** |
| siR_137108 | 14. 6408  | 12. 1205  | -0. 27254517 | 0. 010705042 |    |
| siR_137110 | 0. 01     | 1. 1188   | 6. 80580835  | 4. 20E-10    | ** |
| siR_137112 | 0. 01     | 1. 4172   | 7. 14689956  | 1. 34E-12    | ** |
| siR_137113 | 0. 01     | 1. 0442   | 6. 70625425  | 1. 77E-09    | ** |
| siR_137125 | 1. 4534   | 0. 5221   | -1. 47703375 | 0. 000479018 | ** |
| siR_137158 | 0. 01     | 1. 8274   | 7. 51364865  | 4. 92E-16    | ** |
| siR_137189 | 23. 7515  | 10. 1812  | -1. 22211101 | 4. 44E-35    | ** |
| siR_137204 | 0. 01     | 2. 2749   | 7. 82965932  | 8. 83E-20    | ** |
| siR_137212 | 0. 01     | 1. 9393   | 7. 59939219  | 5. 69E-17    | ** |
| siR_137218 | 1. 4889   | 0. 5221   | -1. 5118488  | 0. 000322184 | ** |
| siR_137222 | 189. 2673 | 112. 2545 | -0. 7536519  | 1. 16E-120   |    |

|            |          |          |             |             |    |
|------------|----------|----------|-------------|-------------|----|
| siR_137231 | 0.01     | 2.9462   | 8.20271156  | 2.12E-25    | ** |
| siR_137236 | 0.01     | 11.7849  | 10.2027238  | 2.19E-99    | ** |
| siR_137249 | 239.9962 | 164.9881 | -0.54064959 | 2.14E-85    |    |
| siR_13727  | 1.3471   | 0.5594   | -1.26790479 | 0.002777337 | ** |
| siR_137273 | 1.0989   | 0.2238   | -2.29577817 | 4.70E-05    | ** |
| siR_137274 | 4.5376   | 1.9393   | -1.22639344 | 6.70E-08    | ** |
| siR_137308 | 3.7222   | 3.2073   | -0.21479627 | 0.307566027 |    |
| siR_137311 | 1.5243   | 0.4475   | -1.76818728 | 4.70E-05    | ** |
| siR_137334 | 2.3397   | 2.3868   | 0.02875412  | 0.907592731 |    |
| siR_137335 | 1.5952   | 1.1934   | -0.41865963 | 0.21138519  |    |
| siR_137350 | 0.01     | 1.2307   | 6.94333532  | 4.86E-11    | ** |
| siR_137380 | 0.9571   | 2.0139   | 1.07325047  | 0.001217132 | ** |
| siR_137388 | 23.6806  | 12.4562  | -0.92684162 | 6.72E-23    |    |
| siR_137392 | 3.6159   | 2.0139   | -0.84436273 | 0.000393833 |    |
| siR_137393 | 1.2407   | 0.3356   | -1.88633969 | 0.000130463 | ** |
| siR_137421 | 3.3323   | 1.1561   | -1.5272521  | 4.79E-08    | ** |
| siR_137424 | 0.01     | 33.2288  | 11.69821848 | 6.86E-279   | ** |
| siR_137485 | 0.01     | 1.0069   | 6.6537766   | 3.63E-09    | ** |
| siR_137490 | 46.4749  | 24.6885  | -0.91261258 | 2.71E-42    |    |
| siR_137505 | 0.6735   | 1.2307   | 0.86972928  | 0.034360686 |    |
| siR_137516 | 0.01     | 2.2003   | 7.78155643  | 3.72E-19    | ** |
| siR_137550 | 0.01     | 2.4614   | 7.94333532  | 2.43E-21    | ** |
| siR_137555 | 1.5598   | 0.6713   | -1.21633151 | 0.00179751  | ** |
| siR_137556 | 1.8788   | 0.4848   | -1.95434989 | 1.25E-06    | ** |
| siR_137561 | 35.5209  | 26.9635  | -0.39766036 | 1.35E-08    |    |
| siR_137562 | 1.9852   | 1.1561   | -0.78001817 | 0.014520232 |    |
| siR_137566 | 27.8991  | 20.2879  | -0.45959904 | 8.72E-09    |    |
| siR_137568 | 1.8079   | 1.1188   | -0.69236272 | 0.035664641 |    |
| siR_137584 | 1.3471   | 0.4848   | -1.47439535 | 0.000796247 | ** |
| siR_137608 | 1.2053   | 0.3729   | -1.69253158 | 0.000467353 | ** |
| siR_137620 | 0.01     | 48.3329  | 12.23878984 | 0           | ** |
| siR_137623 | 3.8286   | 1.529    | -1.32422853 | 1.44E-07    | ** |
| siR_137626 | 2.446    | 1.0442   | -1.22802634 | 7.66E-05    | ** |
| siR_137637 | 4.2894   | 2.3495   | -0.86842209 | 7.61E-05    |    |
| siR_13766  | 3.1905   | 4.0277   | 0.3361737   | 0.10221084  |    |
| siR_13769  | 1.8434   | 1.9393   | 0.07316684  | 0.794554534 |    |
| siR_137698 | 4.5376   | 2.3122   | -0.97266324 | 7.60E-06    |    |
| siR_1377   | 1.5952   | 0.2984   | -2.41841787 | 3.60E-07    | ** |
| siR_137701 | 1.4534   | 1.268    | -0.19687707 | 0.561185369 |    |
| siR_137708 | 18.1149  | 5.6314   | -1.68561131 | 6.60E-43    | ** |
| siR_13771  | 0.01     | 4.1769   | 8.70628879  | 1.06E-35    | ** |
| siR_137714 | 0.01     | 1.4172   | 7.14689956  | 1.34E-12    | ** |
| siR_137759 | 1.7016   | 1.0815   | -0.65385827 | 0.052814454 |    |
| siR_137772 | 0.01     | 1.0442   | 6.70625425  | 1.77E-09    | ** |
| siR_137786 | 1.8788   | 0.4475   | -2.06985191 | 4.88E-07    | ** |
| siR_137805 | 1.5243   | 0.634    | -1.26559212 | 0.001459604 | ** |
| siR_137808 | 2.9423   | 1.3426   | -1.13191481 | 4.68E-05    | ** |

|            |           |           |              |              |    |
|------------|-----------|-----------|--------------|--------------|----|
| siR_137814 | 1. 1344   | 0. 4102   | -1. 46753004 | 0. 002218064 | ** |
| siR_13782  | 3. 0841   | 2. 4241   | -0. 34740033 | 0. 142311898 |    |
| siR_137844 | 1. 7016   | 1. 3053   | -0. 38251052 | 0. 235099543 |    |
| siR_13785  | 40. 342   | 19. 2436  | -1. 06790389 | 2. 16E-47    | ** |
| siR_137854 | 1. 5243   | 1. 3053   | -0. 22376545 | 0. 500269948 |    |
| siR_137860 | 0. 01     | 1. 268    | 6. 98641094  | 2. 37E-11    | ** |
| siR_137862 | 17. 8313  | 8. 2047   | -1. 1198894  | 1. 76E-23    | ** |
| siR_13790  | 1. 5952   | 0. 9323   | -0. 77487114 | 0. 029704074 |    |
| siR_137915 | 13. 4001  | 5. 6687   | -1. 24115394 | 6. 00E-21    | ** |
| siR_137936 | 1. 1698   | 0. 8205   | -0. 51168666 | 0. 199636034 |    |
| siR_137988 | 2. 8714   | 1. 1188   | -1. 35980216 | 3. 46E-06    | ** |
| siR_138006 | 2. 2688   | 0. 4475   | -2. 34196985 | 2. 24E-09    | ** |
| siR_138053 | 1. 2053   | 0. 5967   | -1. 0143146  | 0. 01809496  | *  |
| siR_138067 | 5. 7074   | 2. 6852   | -1. 08780413 | 3. 65E-08    | ** |
| siR_138068 | 1. 0635   | 0. 2984   | -1. 83350059 | 0. 000528454 | ** |
| siR_138101 | 26. 6584  | 6. 4891   | -2. 03849989 | 3. 46E-80    | ** |
| siR_138118 | 0. 01     | 2. 0885   | 7. 70632333  | 3. 21E-18    | ** |
| siR_138123 | 3. 4386   | 2. 3122   | -0. 57255511 | 0. 014009934 |    |
| siR_138124 | 2. 6587   | 1. 4545   | -0. 8701977  | 0. 001852485 |    |
| siR_138135 | 0. 01     | 5. 4449   | 9. 08876174  | 2. 57E-46    | ** |
| siR_138147 | 3. 4741   | 2. 7597   | -0. 33212784 | 0. 13532203  |    |
| siR_138151 | 1006. 247 | 370. 1416 | -1. 44283529 | 0            | ** |
| siR_138179 | 4. 6794   | 1. 7155   | -1. 44769443 | 4. 73E-10    | ** |
| siR_138180 | 1. 5243   | 0. 5594   | -1. 44619471 | 0. 000426884 | ** |
| siR_138199 | 4. 254    | 3. 804    | -0. 16130279 | 0. 408333951 |    |
| siR_138203 | 1. 5952   | 0. 634    | -1. 33118257 | 0. 000706761 | ** |
| siR_138214 | 6. 8064   | 1. 7155   | -1. 98826281 | 5. 20E-21    | ** |
| siR_13822  | 7. 0545   | 4. 1769   | -0. 75611123 | 6. 42E-06    |    |
| siR_138220 | 0. 01     | 5. 3703   | 9. 06885887  | 1. 08E-45    | ** |
| siR_138245 | 0. 01     | 4. 1396   | 8. 69334756  | 2. 17E-35    | ** |
| siR_138246 | 0. 01     | 2. 0885   | 7. 70632333  | 3. 21E-18    | ** |
| siR_138288 | 0. 01     | 16. 111   | 10. 65383033 | 1. 34E-135   | ** |
| siR_138289 | 0. 01     | 1. 529    | 7. 2564446   | 1. 55E-13    | ** |
| siR_138304 | 0. 8153   | 1. 9766   | 1. 27761803  | 0. 00023219  | ** |
| siR_138305 | 0. 01     | 3. 9531   | 8. 62684064  | 7. 90E-34    | ** |
| siR_138319 | 0. 01     | 88. 0508  | 13. 1041204  | 0            | ** |
| siR_138320 | 0. 01     | 2. 3122   | 7. 85312238  | 4. 30E-20    | ** |
| siR_138321 | 0. 01     | 1. 4545   | 7. 18437949  | 6. 51E-13    | ** |
| siR_138338 | 5. 1757   | 1. 3053   | -1. 98737257 | 2. 59E-16    | ** |
| siR_138340 | 0. 01     | 1. 0069   | 6. 6537766   | 3. 63E-09    | ** |
| siR_138355 | 1. 028    | 0. 5594   | -0. 87788811 | 0. 053501766 |    |
| siR_138359 | 0. 01     | 2. 163    | 7. 75688986  | 7. 63E-19    | ** |
| siR_138410 | 7. 0545   | 3. 5802   | -0. 97850365 | 1. 95E-08    |    |
| siR_138411 | 1. 1344   | 0. 5221   | -1. 11953137 | 0. 013060942 | *  |
| siR_138422 | 1. 3116   | 1. 268    | -0. 04877306 | 0. 890739079 |    |
| siR_138423 | 1. 6307   | 1. 0815   | -0. 59245773 | 0. 082669964 |    |
| siR_138424 | 1. 028    | 0. 7086   | -0. 53679689 | 0. 21005998  |    |

|            |         |         |             |             |    |
|------------|---------|---------|-------------|-------------|----|
| siR_138438 | 2.3751  | 0.7086  | -1.74494489 | 4.24E-07    | ** |
| siR_13844  | 1.5952  | 1.1934  | -0.41865963 | 0.21138519  |    |
| siR_138446 | 7.4445  | 3.5802  | -1.05613477 | 8.03E-10    | ** |
| siR_138460 | 1.0635  | 0.634   | -0.74626529 | 0.087380955 |    |
| siR_138478 | 1.2053  | 0.8578  | -0.49067906 | 0.210074901 |    |
| siR_138506 | 0.01    | 16.4466 | 10.68357365 | 2.08E-138   | ** |
| siR_138507 | 0.01    | 14.0971 | 10.46118269 | 9.65E-119   | ** |
| siR_138508 | 0.01    | 1.8647  | 7.54279973  | 2.40E-16    | ** |
| siR_138518 | 0.01    | 17.4535 | 10.76930066 | 7.73E-147   | ** |
| siR_13854  | 0.01    | 1.4172  | 7.14689956  | 1.34E-12    | ** |
| siR_138550 | 0.01    | 1.1561  | 6.85312238  | 2.05E-10    | ** |
| siR_138559 | 2.2333  | 0.8578  | -1.38046384 | 3.57E-05    | ** |
| siR_138576 | 0.01    | 1.7155  | 7.42248532  | 4.25E-15    | ** |
| siR_138577 | 1.3825  | 0.5967  | -1.2122018  | 0.003421985 | ** |
| siR_138579 | 0.01    | 2.3495  | 7.87620996  | 2.10E-20    | ** |
| siR_138580 | 0.01    | 1.4545  | 7.18437949  | 6.51E-13    | ** |
| siR_138588 | 0.01    | 2.6479  | 8.04870483  | 6.67E-23    | ** |
| siR_138595 | 18.7885 | 10.4796 | -0.84226624 | 5.88E-16    |    |
| siR_138598 | 0.01    | 1.0069  | 6.6537766   | 3.63E-09    | ** |
| siR_138600 | 1.3116  | 0.5594  | -1.22937565 | 0.003968625 | ** |
| siR_138601 | 22.688  | 13.7987 | -0.71739708 | 9.81E-15    |    |
| siR_138608 | 0.01    | 2.6852  | 8.06888574  | 3.25E-23    | ** |
| siR_138633 | 55.231  | 39.9417 | -0.46758251 | 1.91E-16    |    |
| siR_13864  | 1.2407  | 0.5967  | -1.05607663 | 0.013149564 | *  |
| siR_138659 | 2.4106  | 3.3192  | 0.46144328  | 0.046475699 |    |
| siR_138668 | 0.01    | 5.5568  | 9.11811051  | 2.98E-47    | ** |
| siR_138671 | 0.01    | 1.0069  | 6.6537766   | 3.63E-09    | ** |
| siR_138682 | 2.127   | 1.0815  | -0.97578637 | 0.002215323 |    |
| siR_138706 | 10.2096 | 5.6687  | -0.84883652 | 1.97E-09    |    |
| siR_138723 | 1.2053  | 0.3729  | -1.69253158 | 0.000467353 | ** |
| siR_138724 | 1.1344  | 0.0373  | -4.92660999 | 9.09E-09    | ** |
| siR_138731 | 0.01    | 3.6175  | 8.49884921  | 5.10E-31    | ** |
| siR_138736 | 0.01    | 1.8647  | 7.54279973  | 2.40E-16    | ** |
| siR_138798 | 8.2598  | 3.6175  | -1.19111383 | 9.96E-13    | ** |
| siR_13880  | 6.5228  | 3.0208  | -1.11056072 | 2.12E-09    | ** |
| siR_138815 | 82.1021 | 62.057  | -0.40382517 | 1.93E-18    |    |
| siR_138816 | 1.1698  | 0.7086  | -0.72321852 | 0.080618428 |    |
| siR_138819 | 3.864   | 5.072   | 0.39245965  | 0.033977958 |    |
| siR_138842 | 0.01    | 1.3799  | 7.10841991  | 2.74E-12    | ** |
| siR_138858 | 7.1254  | 5.967   | -0.25596523 | 0.093999072 |    |
| siR_138871 | 16.4488 | 9.2116  | -0.83645867 | 5.24E-14    |    |
| siR_138879 | 3.5804  | 1.7901  | -1.00008059 | 4.81E-05    | ** |
| siR_13888  | 0.01    | 3.7667  | 8.55715732  | 2.87E-32    | ** |
| siR_138889 | 40.0584 | 14.7684 | -1.43959126 | 4.39E-74    | ** |
| siR_138891 | 10.5995 | 5.6687  | -0.90290639 | 1.18E-10    |    |
| siR_138894 | 1.2053  | 0.2238  | -2.42911034 | 1.01E-05    | ** |
| siR_138915 | 1.028   | 0.1492  | -2.78452082 | 1.19E-05    | ** |

|            |          |          |             |             |    |
|------------|----------|----------|-------------|-------------|----|
| siR_138937 | 169.9116 | 164.5405 | -0.04634162 | 0.123694438 |    |
| siR_138938 | 0.7444   | 1.0069   | 0.43577045  | 0.30071039  |    |
| siR_138943 | 5.3884   | 3.6921   | -0.54541532 | 0.003189088 |    |
| siR_138958 | 4.254    | 1.6036   | -1.40750571 | 6.20E-09    | ** |
| siR_139019 | 1.4534   | 0.4848   | -1.58397021 | 0.000237648 | ** |
| siR_139055 | 8.7916   | 6.3773   | -0.46318    | 0.001158477 |    |
| siR_139059 | 2.5878   | 1.9393   | -0.41619012 | 0.111933192 |    |
| siR_139067 | 2.6587   | 0.3356   | -2.98590638 | 1.29E-13    | ** |
| siR_139072 | 7.1254   | 3.0581   | -1.22033542 | 1.49E-11    | ** |
| siR_139073 | 1.2407   | 0.4475   | -1.47119473 | 0.001326969 | ** |
| siR_139108 | 3.7222   | 1.9393   | -0.94061958 | 8.16E-05    |    |
| siR_139138 | 6.6646   | 3.0581   | -1.12388271 | 9.83E-10    | ** |
| siR_139143 | 4.7148   | 3.8413   | -0.29560193 | 0.118627789 |    |
| siR_139174 | 1.7725   | 0.5594   | -1.66383347 | 2.51E-05    | ** |
| siR_139188 | 2.836    | 0.7086   | -2.00081416 | 1.28E-09    | ** |
| siR_139201 | 4.4667   | 2.2003   | -1.02150912 | 3.76E-06    | ** |
| siR_139253 | 2.2333   | 1.4918   | -0.58212293 | 0.044977969 |    |
| siR_139265 | 0.01     | 2.1258   | 7.73186206  | 1.57E-18    | ** |
| siR_139267 | 0.01     | 1.7528   | 7.45351758  | 2.07E-15    | ** |
| siR_139274 | 3.5804   | 3.2446   | -0.14208014 | 0.503123961 |    |
| siR_139281 | 35.9817  | 39.8298  | 0.14658489  | 0.020422959 |    |
| siR_139284 | 6.9482   | 4.9974   | -0.47546158 | 0.003106432 |    |
| siR_139299 | 1.4889   | 0.4102   | -1.85984746 | 3.15E-05    | ** |
| siR_139311 | 8.3307   | 6.0416   | -0.46350706 | 0.001554539 |    |
| siR_139331 | 3.3677   | 2.5733   | -0.38814397 | 0.088769595 |    |
| siR_139338 | 0.01     | 4.3634   | 8.76930892  | 2.91E-37    | ** |
| siR_139370 | 4.5376   | 4.3261   | -0.06886242 | 0.711803529 |    |
| siR_139371 | 2.3397   | 1.529    | -0.61373515 | 0.031403936 |    |
| siR_139372 | 1.7016   | 0.9696   | -0.81143033 | 0.019405045 |    |
| siR_139385 | 1.2053   | 0.4102   | -1.55499288 | 0.000989728 | ** |
| siR_139389 | 17.5477  | 8.6895   | -1.01393688 | 6.50E-20    | ** |
| siR_139397 | 1.6307   | 0.0746   | -4.45017195 | 1.34E-11    | ** |
| siR_139399 | 1.5598   | 0.634    | -1.29880631 | 0.001018403 | ** |
| siR_139425 | 0.01     | 11.0017  | 10.10351075 | 7.86E-93    | ** |
| siR_139431 | 0.01     | 9.0997   | 9.82967517  | 6.56E-77    | ** |
| siR_139436 | 7.9408   | 7.9436   | 0.00050862  | 0.995771801 |    |
| siR_13944  | 8.9334   | 3.0581   | -1.54657378 | 1.39E-19    | ** |
| siR_139440 | 1.9497   | 1.6782   | -0.21633749 | 0.459383335 |    |
| siR_13945  | 10.2096  | 4.5499   | -1.1660196  | 6.27E-15    | ** |
| siR_139490 | 2.836    | 3.2073   | 0.17750177  | 0.428237144 |    |
| siR_139515 | 0.01     | 1.1188   | 6.80580835  | 4.20E-10    | ** |
| siR_139554 | 4.3958   | 3.431    | -0.35749662 | 0.071493321 |    |
| siR_139558 | 28.1118  | 16.372   | -0.77994526 | 1.89E-20    |    |
| siR_139581 | 3.545    | 0.7832   | -2.17833296 | 7.17E-13    | ** |
| siR_139607 | 0.01     | 57.8428  | 12.49792168 | 0           | ** |
| siR_139608 | 0.01     | 3.431    | 8.42248532  | 1.85E-29    | ** |
| siR_139611 | 0.01     | 6.6756   | 9.3827537   | 1.28E-56    | ** |

|            |           |          |              |              |    |
|------------|-----------|----------|--------------|--------------|----|
| siR_139663 | 1. 5952   | 1. 0442  | -0. 61133925 | 0. 07756025  |    |
| siR_139687 | 1. 6661   | 1. 1188  | -0. 57452284 | 0. 08784456  |    |
| siR_139716 | 0. 01     | 2. 6479  | 8. 04870483  | 6. 67E-23    | ** |
| siR_139717 | 1. 1344   | 0. 4475  | -1. 34196985 | 0. 004230483 | ** |
| siR_139720 | 1. 0989   | 0. 3356  | -1. 71124549 | 0. 000775199 | ** |
| siR_139728 | 5. 4238   | 0. 9323  | -2. 54043781 | 1. 82E-22    | ** |
| siR_139749 | 1. 6307   | 0. 4102  | -1. 991092   | 5. 04E-06    | ** |
| siR_13978  | 265. 0948 | 91. 8548 | -1. 52908135 | 0            | ** |
| siR_13979  | 6. 5937   | 1. 902   | -1. 793571   | 5. 86E-18    | ** |
| siR_13980  | 0. 6381   | 1. 8274  | 1. 51793802  | 5. 55E-05    | ** |
| siR_139814 | 1. 4889   | 1. 1188  | -0. 4122947  | 0. 234339555 |    |
| siR_139825 | 19. 9583  | 34. 5714 | 0. 79259019  | 1. 48E-25    |    |
| siR_13983  | 5. 7074   | 2. 3495  | -1. 28047991 | 3. 66E-10    | ** |
| siR_139853 | 2. 3751   | 1. 1188  | -1. 0860361  | 0. 00041126  | ** |
| siR_13986  | 15. 1371  | 8. 9505  | -0. 75804865 | 3. 31E-11    |    |
| siR_139866 | 0. 01     | 9. 9575  | 9. 95963976  | 4. 33E-84    | ** |
| siR_139868 | 0. 01     | 3. 2446  | 8. 34189682  | 6. 75E-28    | ** |
| siR_13987  | 2. 0915   | 0. 8951  | -1. 22441722 | 0. 000267923 | ** |
| siR_139918 | 0. 01     | 2. 6106  | 8. 02823761  | 1. 37E-22    | ** |
| siR_139941 | 4. 6085   | 3. 3564  | -0. 45738259 | 0. 020288803 |    |
| siR_139955 | 2. 2333   | 1. 1188  | -0. 9972249  | 0. 001405726 |    |
| siR_139975 | 1. 6661   | 1. 4172  | -0. 23343162 | 0. 462399364 |    |
| siR_139976 | 1. 4889   | 0. 9323  | -0. 67538069 | 0. 062701585 |    |
| siR_139990 | 4. 5376   | 5. 9297  | 0. 38602968  | 0. 023931604 |    |
| siR_139997 | 3. 4032   | 0. 6713  | -2. 34186239 | 2. 02E-13    | ** |
| siR_140002 | 3. 5804   | 1. 9393  | -0. 88458478 | 0. 000243762 |    |
| siR_140021 | 1. 4534   | 1. 3053  | -0. 15505039 | 0. 645288754 |    |
| siR_140023 | 1. 8079   | 1. 1188  | -0. 69236272 | 0. 035664641 |    |
| siR_140032 | 0. 01     | 1. 529   | 7. 2564446   | 1. 55E-13    | ** |
| siR_140038 | 34. 9182  | 10. 2185 | -1. 77279576 | 6. 49E-87    | ** |
| siR_140077 | 0. 01     | 4. 5499  | 8. 82969103  | 8. 00E-39    | ** |
| siR_140089 | 0. 01     | 1. 6782  | 7. 39077085  | 8. 72E-15    | ** |
| siR_140094 | 1. 418    | 2. 6479  | 0. 90099111  | 0. 001311166 |    |
| siR_140097 | 15. 3144  | 11. 3373 | -0. 43381174 | 5. 35E-05    |    |
| siR_14010  | 7. 5863   | 0. 4848  | -3. 96793482 | 3. 93E-46    | ** |
| siR_140101 | 3. 864    | 2. 4241  | -0. 67264588 | 0. 002625271 |    |
| siR_140110 | 1. 5598   | 1. 0442  | -0. 57896299 | 0. 096572007 |    |
| siR_140114 | 0. 01     | 5. 6314  | 9. 13734982  | 7. 07E-48    | ** |
| siR_140117 | 7. 5863   | 2. 9835  | -1. 34639065 | 5. 59E-14    | ** |
| siR_140119 | 3. 4741   | 3. 3192  | -0. 06580372 | 0. 757889779 |    |
| siR_140131 | 0. 8153   | 1. 7901  | 1. 13463726  | 0. 001435298 | ** |
| siR_140132 | 0. 01     | 2. 0512  | 7. 68032436  | 6. 59E-18    | ** |
| siR_140134 | 1. 5952   | 1. 6036  | 0. 00757701  | 0. 977649545 |    |
| siR_140137 | 5. 0339   | 1. 529   | -1. 71908815 | 2. 50E-13    | ** |
| siR_140141 | 6. 381    | 1. 7901  | -1. 83374235 | 6. 47E-18    | ** |
| siR_140157 | 12. 8683  | 6. 9367  | -0. 89150008 | 2. 15E-12    |    |
| siR_140161 | 2. 6587   | 1. 529   | -0. 79813259 | 0. 003838526 |    |



|            |         |         |             |             |    |
|------------|---------|---------|-------------|-------------|----|
| siR_140163 | 1.4889  | 0.3729  | -1.99738616 | 1.28E-05    | ** |
| siR_140181 | 5.282   | 2.163   | -1.28805064 | 1.40E-09    | ** |
| siR_140185 | 28.9981 | 8.8014  | -1.72015345 | 1.43E-69    | ** |
| siR_140205 | 13.081  | 9.0624  | -0.52950776 | 7.42E-06    |    |
| siR_140214 | 0.01    | 16.8195 | 10.7159191  | 1.57E-141   | ** |
| siR_140218 | 0.01    | 1.4545  | 7.18437949  | 6.51E-13    | ** |
| siR_140222 | 0.01    | 2.163   | 7.75688986  | 7.63E-19    | ** |
| siR_140223 | 0.01    | 2.2749  | 7.82965932  | 8.83E-20    | ** |
| siR_140233 | 4.0413  | 0.8578  | -2.23610623 | 6.52E-15    | ** |
| siR_140251 | 0.01    | 7.3842  | 9.52829782  | 1.50E-62    | ** |
| siR_140263 | 1.6307  | 1.4918  | -0.12843726 | 0.684834683 |    |
| siR_140289 | 1.8079  | 0.8205  | -1.13973964 | 0.001387975 | ** |
| siR_14029  | 12.1239 | 43.8576 | 1.85497301  | 1.01E-116   | ** |
| siR_140311 | 0.01    | 1.1561  | 6.85312238  | 2.05E-10    | ** |
| siR_140317 | 4.0767  | 3.6175  | -0.17240878 | 0.387896098 |    |
| siR_14033  | 17.3705 | 17.9383 | 0.04640389  | 0.615716902 |    |
| siR_140341 | 0.01    | 8.8014  | 9.78158921  | 2.06E-74    | ** |
| siR_140342 | 0.01    | 6.4518  | 9.33355791  | 9.59E-55    | ** |
| siR_140343 | 0.01    | 2.4987  | 7.96503389  | 1.18E-21    | ** |
| siR_140349 | 0.01    | 3.2073  | 8.32521549  | 1.38E-27    | ** |
| siR_140355 | 0.01    | 5.4449  | 9.08876174  | 2.57E-46    | ** |
| siR_140356 | 0.01    | 4.3634  | 8.76930892  | 2.91E-37    | ** |
| siR_140387 | 0.0354  | 48.3329 | 10.41504048 | 0           | ** |
| siR_140389 | 0.01    | 13.6868 | 10.41856947 | 2.62E-115   | ** |
| siR_140392 | 0.01    | 1.5663  | 7.29121675  | 7.54E-14    | ** |
| siR_140397 | 0.01    | 4.3634  | 8.76930892  | 2.91E-37    | ** |
| siR_140408 | 0.01    | 1.1934  | 6.89893387  | 9.98E-11    | ** |
| siR_140416 | 7.2672  | 7.6079  | 0.06609867  | 0.642451077 |    |
| siR_140418 | 0.01    | 1.7155  | 7.42248532  | 4.25E-15    | ** |
| siR_140424 | 2.0561  | 1.0442  | -0.97751237 | 0.002596476 |    |
| siR_140427 | 17.9731 | 24.3902 | 0.44046232  | 2.20E-07    |    |
| siR_14045  | 5.672   | 6.5637  | 0.21065177  | 0.181147562 |    |
| siR_140455 | 16.2361 | 6.0789  | -1.41732294 | 2.36E-30    | ** |
| siR_140458 | 4.6794  | 2.5733  | -0.8627039  | 3.95E-05    |    |
| siR_140459 | 1.3471  | 0.4475  | -1.58989736 | 0.000394142 | ** |
| siR_140478 | 1.0989  | 2.2003  | 1.00164013  | 0.001388167 | ** |
| siR_14048  | 7.2318  | 3.3937  | -1.09149574 | 4.98E-10    | ** |
| siR_140552 | 0.01    | 4.8855  | 8.93236241  | 1.24E-41    | ** |
| siR_140633 | 23.4679 | 7.8317  | -1.58329134 | 1.65E-50    | ** |
| siR_140634 | 7.8699  | 1.8647  | -2.07740176 | 2.23E-25    | ** |
| siR_140638 | 63.9517 | 21.7796 | -1.55400525 | 5.52E-131   | ** |
| siR_140639 | 0.01    | 3.9531  | 8.62684064  | 7.90E-34    | ** |
| siR_140641 | 3.7222  | 0.5594  | -2.73420342 | 4.59E-17    | ** |
| siR_140643 | 0.01    | 3.9159  | 8.61320011  | 1.62E-33    | ** |
| siR_140644 | 2.4106  | 2.4614  | 0.03008685  | 0.902053431 |    |
| siR_140646 | 0.7799  | 1.1188  | 0.5205911   | 0.199019168 |    |
| siR_140647 | 1.7016  | 0.9323  | -0.86802577 | 0.013287385 |    |

|            |         |         |             |             |    |
|------------|---------|---------|-------------|-------------|----|
| siR_140648 | 0.9217  | 1.0069  | 0.12755125  | 0.746667492 |    |
| siR_140651 | 1.3825  | 0.8578  | -0.68856626 | 0.068256577 |    |
| siR_140659 | 2.8714  | 1.0069  | -1.51183391 | 5.03E-07    | ** |
| siR_140660 | 1.028   | 0.2238  | -2.19955832 | 0.000127871 | ** |
| siR_140688 | 0.9926  | 1.1561  | 0.21998183  | 0.559217288 |    |
| siR_140690 | 1.0635  | 0.7832  | -0.44136736 | 0.286432527 |    |
| siR_140693 | 4.4312  | 2.6479  | -0.7428488  | 0.000437063 |    |
| siR_140699 | 1.5243  | 0.5967  | -1.35306919 | 0.000806564 | ** |
| siR_140707 | 1.9143  | 0.634   | -1.59426219 | 2.13E-05    | ** |
| siR_140710 | 12.6556 | 4.5499  | -1.47586916 | 2.09E-25    | ** |
| siR_140714 | 12.5138 | 4.1769  | -1.58301544 | 1.09E-27    | ** |
| siR_140719 | 1.1698  | 0.1119  | -3.38597995 | 2.69E-07    | ** |
| siR_140724 | 0.01    | 1.0069  | 6.6537766   | 3.63E-09    | ** |
| siR_140727 | 0.01    | 3.0954  | 8.27398204  | 1.20E-26    | ** |
| siR_140729 | 0.01    | 3.5056  | 8.45351758  | 4.40E-30    | ** |
| siR_140753 | 5.5302  | 1.6782  | -1.720417   | 1.62E-14    | ** |
| siR_140796 | 1.6307  | 1.4172  | -0.20244802 | 0.526542385 |    |
| siR_140811 | 2.446   | 0.8205  | -1.57584917 | 1.79E-06    | ** |
| siR_140836 | 2.127   | 1.3799  | -0.62425631 | 0.037353781 |    |
| siR_140848 | 4.9984  | 2.2003  | -1.18376612 | 3.54E-08    | ** |
| siR_140858 | 1.1698  | 0.5594  | -1.06430974 | 0.015477614 | *  |
| siR_140873 | 4.1476  | 1.3426  | -1.62724722 | 1.72E-10    | ** |
| siR_140909 | 1.2762  | 1.1561  | -0.14258825 | 0.691993921 |    |
| siR_140917 | 5.991   | 5.5568  | -0.10854252 | 0.504830489 |    |
| siR_140931 | 4.2185  | 1.2307  | -1.77725097 | 7.29E-12    | ** |
| siR_14094  | 2.4106  | 0.2611  | -3.20671792 | 3.03E-13    | ** |
| siR_140942 | 51.8278 | 47.848  | -0.11526753 | 0.036706444 |    |
| siR_140960 | 1.6661  | 0.5221  | -1.67407693 | 4.12E-05    | ** |
| siR_140968 | 2.4106  | 0.5967  | -2.0143146  | 1.98E-08    | ** |
| siR_140991 | 6.0619  | 3.4683  | -0.80554136 | 1.01E-05    |    |
| siR_141000 | 1.737   | 0.634   | -1.45404301 | 0.000155901 | ** |
| siR_141009 | 3.7931  | 2.6106  | -0.53899598 | 0.01449513  |    |
| siR_141048 | 2.3042  | 0.8578  | -1.42555272 | 1.69E-05    | ** |
| siR_141049 | 9.9614  | 2.6106  | -1.93196709 | 5.44E-29    | ** |
| siR_141084 | 5.3529  | 0.634   | -3.07776596 | 8.03E-27    | ** |
| siR_141085 | 1.2762  | 0.2238  | -2.5115725  | 3.57E-06    | ** |
| siR_141118 | 0.0354  | 7.4215  | 7.71181764  | 7.59E-61    | ** |
| siR_141122 | 0.0354  | 57.0596 | 10.65450456 | 0           | ** |
| siR_141132 | 0.01    | 3.8413  | 8.58545083  | 6.83E-33    | ** |
| siR_14115  | 1.2762  | 0.3729  | -1.77499374 | 0.000195629 | ** |
| siR_141164 | 12.762  | 4.9228  | -1.37430341 | 3.63E-23    | ** |
| siR_141165 | 8.9334  | 3.8413  | -1.21761472 | 4.44E-14    | ** |
| siR_141166 | 1.8079  | 1.0815  | -0.74128122 | 0.025750103 |    |
| siR_141173 | 8.2953  | 11.1882 | 0.43161189  | 0.000575945 |    |
| siR_141177 | 2.6942  | 1.4172  | -0.92681358 | 0.000950785 |    |
| siR_14119  | 2.127   | 0.9323  | -1.18995386 | 0.000326206 | ** |
| siR_141192 | 1.3116  | 0.4475  | -1.55136822 | 0.000594069 | ** |

|            |           |           |              |              |    |
|------------|-----------|-----------|--------------|--------------|----|
| siR_141271 | 1. 2407   | 0. 5221   | -1. 24875625 | 0. 004597643 | ** |
| siR_141292 | 1. 9852   | 1. 5663   | -0. 3419238  | 0. 247756469 |    |
| siR_141293 | 4. 963    | 5. 5941   | 0. 17269359  | 0. 308234209 |    |
| siR_141297 | 4. 1476   | 1. 1561   | -1. 84301057 | 3. 29E-12    | ** |
| siR_141302 | 2. 6942   | 1. 8647   | -0. 53091341 | 0. 042496396 |    |
| siR_141325 | 1. 2407   | 0. 7086   | -0. 80811094 | 0. 047445627 |    |
| siR_141337 | 3. 2968   | 1. 5663   | -1. 0737058  | 3. 59E-05    | ** |
| siR_141365 | 1. 0989   | 0. 4475   | -1. 29610052 | 0. 006143403 | ** |
| siR_141380 | 71. 538   | 40. 352   | -0. 8260696  | 1. 86E-54    |    |
| siR_141381 | 5. 4238   | 2. 0885   | -1. 37683684 | 1. 05E-10    | ** |
| siR_141382 | 3. 0841   | 1. 3053   | -1. 24046812 | 7. 36E-06    | ** |
| siR_141383 | 2. 6233   | 1. 0815   | -1. 27834914 | 2. 36E-05    | ** |
| siR_141385 | 1. 2762   | 0. 2984   | -2. 096535   | 3. 20E-05    | ** |
| siR_141389 | 4. 4667   | 2. 2376   | -0. 9972572  | 5. 80E-06    |    |
| siR_141390 | 2. 446    | 1. 0815   | -1. 17739074 | 0. 000130415 | ** |
| siR_141391 | 2. 0206   | 0. 8578   | -1. 23607053 | 0. 000308801 | ** |
| siR_141392 | 2. 3042   | 0. 5967   | -1. 94918826 | 7. 91E-08    | ** |
| siR_141393 | 1. 5243   | 0. 2984   | -2. 35282743 | 1. 00E-06    | ** |
| siR_14140  | 9. 3588   | 5. 6687   | -0. 72330564 | 5. 65E-07    |    |
| siR_141401 | 6. 3101   | 4. 5871   | -0. 46008051 | 0. 006269867 |    |
| siR_141402 | 4. 963    | 2. 2376   | -1. 1492603  | 8. 10E-08    | ** |
| siR_141403 | 4. 4312   | 1. 7901   | -1. 30765726 | 2. 04E-08    | ** |
| siR_14143  | 22. 1562  | 7. 869    | -1. 49345825 | 5. 30E-44    | ** |
| siR_141439 | 1. 7725   | 0. 9696   | -0. 87032402 | 0. 011285895 |    |
| siR_141448 | 40. 9447  | 14. 6565  | -1. 48213609 | 5. 80E-79    | ** |
| siR_141452 | 2. 4815   | 0. 6713   | -1. 88618291 | 4. 91E-08    | ** |
| siR_14146  | 0. 01     | 2. 2003   | 7. 78155643  | 3. 72E-19    | ** |
| siR_141512 | 4. 2894   | 2. 3495   | -0. 86842209 | 7. 61E-05    |    |
| siR_141514 | 22. 0144  | 12. 7918  | -0. 78322824 | 1. 86E-16    |    |
| siR_141518 | 5. 3175   | 4. 6617   | -0. 18989196 | 0. 278274334 |    |
| siR_141522 | 18. 6467  | 9. 3981   | -0. 98847931 | 2. 91E-20    |    |
| siR_141540 | 1. 0635   | 0. 3356   | -1. 66400541 | 0. 001193189 | ** |
| siR_141563 | 0. 01     | 89. 2442  | 13. 1235427  | 0            | ** |
| siR_141564 | 0. 01     | 2. 2376   | 7. 80580835  | 1. 81E-19    | ** |
| siR_141565 | 0. 01     | 1. 0815   | 6. 75688986  | 8. 62E-10    | ** |
| siR_141571 | 0. 01     | 21. 2575  | 11. 05375622 | 1. 11E-178   | ** |
| siR_141572 | 0. 01     | 5. 7805   | 9. 17505048  | 3. 99E-49    | ** |
| siR_141578 | 0. 01     | 4. 4753   | 8. 80584059  | 3. 37E-38    | ** |
| siR_141579 | 0. 01     | 1. 268    | 6. 98641094  | 2. 37E-11    | ** |
| siR_141586 | 0. 01     | 8. 1674   | 9. 67373308  | 4. 18E-69    | ** |
| siR_14159  | 1. 1344   | 0. 3729   | -1. 60506874 | 0. 001091833 | ** |
| siR_14160  | 4. 5021   | 0. 9323   | -2. 27173193 | 9. 54E-17    | ** |
| siR_141625 | 1. 3471   | 1. 902    | 0. 4976603   | 0. 106905394 |    |
| siR_141629 | 1. 0635   | 0. 7832   | -0. 44136736 | 0. 286432527 |    |
| siR_141650 | 2. 3751   | 0. 7459   | -1. 67093413 | 9. 28E-07    | ** |
| siR_141658 | 0. 8862   | 1. 1188   | 0. 33624793  | 0. 390862943 |    |
| siR_141664 | 202. 8092 | 114. 1565 | -0. 82911009 | 6. 88E-152   |    |

|            |           |          |             |             |    |
|------------|-----------|----------|-------------|-------------|----|
| siR_141665 | 4.3603    | 2.3495   | -0.89207363 | 4.49E-05    |    |
| siR_141666 | 3.0487    | 1.529    | -0.99560579 | 0.000188791 |    |
| siR_141671 | 30.9833   | 29.4622  | -0.07262565 | 0.305536816 |    |
| siR_141677 | 126.8399  | 132.8408 | 0.06668967  | 0.050808795 |    |
| siR_141685 | 1723.0805 | 701.0501 | -1.29740065 | 0           | ** |
| siR_141686 | 1.3116    | 0.6713   | -0.96629826 | 0.017699245 |    |
| siR_14169  | 32.4013   | 17.9756  | -0.85001177 | 8.80E-27    |    |
| siR_141694 | 265.3429  | 178.0036 | -0.57595153 | 2.24E-105   |    |
| siR_141695 | 7.409     | 4.0277   | -0.8793226  | 1.41E-07    |    |
| siR_141696 | 1.028     | 0.3729   | -1.46297956 | 0.003720663 | ** |
| siR_141700 | 13.4001   | 9.2489   | -0.53489007 | 4.71E-06    |    |
| siR_141720 | 44.596    | 24.0172  | -0.89284635 | 3.05E-39    |    |
| siR_141726 | 1.1344    | 1.3053   | 0.20245198  | 0.566494718 |    |
| siR_141729 | 1.4534    | 0.7459   | -0.96237768 | 0.012720128 |    |
| siR_14174  | 0.01      | 3.5056   | 8.45351758  | 4.40E-30    | ** |
| siR_141759 | 2.9778    | 3.3564   | 0.1726678   | 0.429976664 |    |
| siR_141762 | 6.8773    | 5.8178   | -0.24136858 | 0.119932141 |    |
| siR_141765 | 7.8699    | 5.8924   | -0.41748993 | 0.005237469 |    |
| siR_141789 | 2.7296    | 1.4172   | -0.94564618 | 0.000716645 |    |
| siR_14180  | 1.1344    | 0.9323   | -0.28306327 | 0.468279224 |    |
| siR_141811 | 10.0323   | 5.7433   | -0.80470057 | 1.33E-08    |    |
| siR_141812 | 14.1091   | 7.3096   | -0.9487616  | 9.12E-15    |    |
| siR_141861 | 4.4312    | 4.0277   | -0.13774121 | 0.469422602 |    |
| siR_141892 | 0.01      | 1.7155   | 7.42248532  | 4.25E-15    | ** |
| siR_141906 | 3.4386    | 0.9696   | -1.8263597  | 3.05E-10    | ** |
| siR_141916 | 1.737     | 1.0815   | -0.68356409 | 0.041819133 |    |
| siR_14193  | 4.254     | 0.5594   | -2.92686787 | 1.28E-20    | ** |
| siR_141950 | 1.3471    | 0.2238   | -2.58957501 | 1.24E-06    | ** |
| siR_141969 | 0.01      | 71.7907  | 12.80958125 | 0           | ** |
| siR_141971 | 0.01      | 25.7328  | 11.32939273 | 3.84E-216   | ** |
| siR_141974 | 6.5582    | 7.3096   | 0.15649256  | 0.289806145 |    |
| siR_141975 | 1.737     | 1.4918   | -0.21954362 | 0.47916079  |    |
| siR_141976 | 2.9778    | 1.6782   | -0.8273322  | 0.001590907 |    |
| siR_141977 | 1.5598    | 1.8647   | 0.25758249  | 0.388166577 |    |
| siR_142023 | 5.1402    | 6.4891   | 0.3361939   | 0.037942093 |    |
| siR_142075 | 0.01      | 13.3139  | 10.37871752 | 3.47E-112   | ** |
| siR_142084 | 0.01      | 1.1188   | 6.80580835  | 4.20E-10    | ** |
| siR_142100 | 1.0989    | 0.4102   | -1.42166071 | 0.003288611 | ** |
| siR_142102 | 3.0132    | 2.3868   | -0.33621875 | 0.159700013 |    |
| siR_142109 | 1.0989    | 0.5221   | -1.07366204 | 0.018227899 | *  |
| siR_142111 | 2.6587    | 2.5733   | -0.04710134 | 0.84749281  |    |
| siR_142159 | 1.5243    | 0.3729   | -2.03128617 | 7.99E-06    | ** |
| siR_142171 | 4.6085    | 3.9904   | -0.20776388 | 0.271172302 |    |
| siR_142190 | 3.5095    | 1.2307   | -1.51178638 | 2.66E-08    | ** |
| siR_142195 | 8.118     | 5.7805   | -0.48993005 | 0.001015086 |    |
| siR_14220  | 1.028     | 0.3356   | -1.61502564 | 0.001825058 | ** |
| siR_142200 | 33.1812   | 16.372   | -1.01913549 | 1.62E-36    | ** |

|            |         |          |             |             |    |
|------------|---------|----------|-------------|-------------|----|
| siR_142204 | 36.159  | 28.3433  | -0.35134704 | 3.33E-07    |    |
| siR_142244 | 0.01    | 3.6921   | 8.52829782  | 1.21E-31    | ** |
| siR_142247 | 10.635  | 4.5126   | -1.23678923 | 7.47E-17    | ** |
| siR_142255 | 0.01    | 1.4172   | 7.14689956  | 1.34E-12    | ** |
| siR_142277 | 1.6661  | 3.6548   | 1.13331747  | 4.95E-06    | ** |
| siR_142297 | 6.2746  | 1.9393   | -1.69398749 | 5.81E-16    | ** |
| siR_1423   | 1.6307  | 1.268    | -0.36293665 | 0.268725219 |    |
| siR_142300 | 21.3054 | 7.2723   | -1.55073552 | 1.08E-44    | ** |
| siR_142308 | 16.626  | 18.4232  | 0.14808255  | 0.111269043 |    |
| siR_142334 | 1.3471  | 1.0442   | -0.36745889 | 0.310306368 |    |
| siR_142352 | 0.01    | 3.2073   | 8.32521549  | 1.38E-27    | ** |
| siR_142355 | 0.01    | 157.7531 | 13.94538074 | 0           | ** |
| siR_142356 | 0.01    | 2.3868   | 7.89893387  | 1.02E-20    | ** |
| siR_142357 | 0.01    | 2.2749   | 7.82965932  | 8.83E-20    | ** |
| siR_142363 | 0.01    | 7.4215   | 9.535567    | 7.33E-63    | ** |
| siR_142364 | 0.01    | 1.529    | 7.2564446   | 1.55E-13    | ** |
| siR_142374 | 0.01    | 2.6106   | 8.02823761  | 1.37E-22    | ** |
| siR_142394 | 1.0635  | 0.4848   | -1.13335843 | 0.015328041 | *  |
| siR_142396 | 1.3116  | 0.7832   | -0.74387514 | 0.057586901 |    |
| siR_142397 | 4.5021  | 1.9393   | -1.2150621  | 9.36E-08    | ** |
| siR_142399 | 3.7931  | 0.9696   | -1.9679158  | 3.49E-12    | ** |
| siR_142415 | 1.2762  | 0.3356   | -1.92703982 | 8.25E-05    | ** |
| siR_142456 | 1.5243  | 0.2611   | -2.54547251 | 3.07E-07    | ** |
| siR_142463 | 1.028   | 1.5663   | 0.6075203   | 0.080149992 |    |
| siR_142471 | 1.2762  | 0.7086   | -0.84881107 | 0.035970454 |    |
| siR_142475 | 0.01    | 1.529    | 7.2564446   | 1.55E-13    | ** |
| siR_142477 | 0.01    | 2.0512   | 7.68032436  | 6.59E-18    | ** |
| siR_142483 | 2.3397  | 0.5594   | -2.0643714  | 1.94E-08    | ** |
| siR_142491 | 0.01    | 1.4545   | 7.18437949  | 6.51E-13    | ** |
| siR_142509 | 2.4106  | 0.9323   | -1.37052611 | 1.93E-05    | ** |
| siR_142537 | 0.01    | 1.0815   | 6.75688986  | 8.62E-10    | ** |
| siR_142561 | 8.0471  | 4.3634   | -0.88301623 | 3.67E-08    |    |
| siR_142562 | 7.5508  | 2.8716   | -1.3947747  | 1.32E-14    | ** |
| siR_142564 | 1.3471  | 0.5967   | -1.17477927 | 0.004838592 | ** |
| siR_142573 | 1.1344  | 0.1865   | -2.6046819  | 8.62E-06    | ** |
| siR_142592 | 3.7222  | 4.3634   | 0.22929716  | 0.237033152 |    |
| siR_142595 | 1.9143  | 1.3799   | -0.47225322 | 0.12532649  |    |
| siR_142609 | 1.4534  | 1.1188   | -0.37747965 | 0.279258446 |    |
| siR_142639 | 0.01    | 33.3407  | 11.70306868 | 7.94E-280   | ** |
| siR_142645 | 0.01    | 16.4093  | 10.68029798 | 4.26E-138   | ** |
| siR_142648 | 0.01    | 2.8343   | 8.14684866  | 1.83E-24    | ** |
| siR_14265  | 1.8079  | 0.4848   | -1.89885328 | 3.13E-06    | ** |
| siR_142650 | 0.01    | 2.8716   | 8.16571099  | 8.93E-25    | ** |
| siR_142656 | 1.0989  | 0.0746   | -3.88074067 | 1.47E-07    | ** |
| siR_142657 | 2.4815  | 0.5967   | -2.05613477 | 7.78E-09    | ** |
| siR_142673 | 1.418   | 1.0069   | -0.49393712 | 0.170608303 |    |
| siR_142686 | 2.9778  | 2.6106   | -0.18986544 | 0.418632111 |    |

|            |         |         |             |             |    |
|------------|---------|---------|-------------|-------------|----|
| siR_142689 | 10.3159 | 7.4961  | -0.46065759 | 0.00046057  |    |
| siR_142695 | 3.7577  | 2.9089  | -0.36937619 | 0.085960318 |    |
| siR_14270  | 0.01    | 1.8647  | 7.54279973  | 2.40E-16    | ** |
| siR_142703 | 1.2407  | 0.3356  | -1.88633969 | 0.000130463 | ** |
| siR_142724 | 1.028   | 0.634   | -0.69728552 | 0.113380175 |    |
| siR_142743 | 2.5169  | 1.1561  | -1.1223817  | 0.00018693  | ** |
| siR_142784 | 2.7651  | 0.7086  | -1.96428829 | 3.21E-09    | ** |
| siR_142803 | 2.1624  | 1.4172  | -0.60959005 | 0.0398341   |    |
| siR_14282  | 0.01    | 2.797   | 8.12773644  | 3.76E-24    | ** |
| siR_142828 | 10.3868 | 7.0858  | -0.5517486  | 3.42E-05    |    |
| siR_142832 | 2.5524  | 1.4172  | -0.84881107 | 0.002832475 |    |
| siR_142834 | 1.3825  | 0.7832  | -0.81982681 | 0.03388769  |    |
| siR_142837 | 8.5789  | 7.869   | -0.12461237 | 0.36018823  |    |
| siR_142843 | 1.3825  | 0.9323  | -0.56841331 | 0.124362438 |    |
| siR_142885 | 3.1196  | 1.1934  | -1.38628337 | 9.01E-07    | ** |
| siR_142900 | 1.418   | 1.6036  | 0.17745679  | 0.575429967 |    |
| siR_142910 | 0.01    | 1.1188  | 6.80580835  | 4.20E-10    | ** |
| siR_142915 | 2.8714  | 2.2003  | -0.38405408 | 0.1200527   |    |
| siR_142916 | 2.3751  | 2.1258  | -0.15998239 | 0.541538836 |    |
| siR_142923 | 0.01    | 1.6782  | 7.39077085  | 8.72E-15    | ** |
| siR_142931 | 8.4371  | 5.072   | -0.73419246 | 1.50E-06    |    |
| siR_142937 | 40.7674 | 20.3625 | -1.00150125 | 2.87E-43    | ** |
| siR_142938 | 6.3455  | 4.3634  | -0.54028111 | 0.001501604 |    |
| siR_142939 | 2.6233  | 1.3799  | -0.92681908 | 0.001112649 |    |
| siR_142940 | 2.7296  | 1.2307  | -1.14921042 | 7.27E-05    | ** |
| siR_142943 | 1.1698  | 0.2611  | -2.16358753 | 5.01E-05    | ** |
| siR_142947 | 0.01    | 5.2957  | 9.04867759  | 4.56E-45    | ** |
| siR_142955 | 38.286  | 13.7241 | -1.4801054  | 8.34E-74    | ** |
| siR_142956 | 4.7503  | 2.0512  | -1.21155046 | 4.44E-08    | ** |
| siR_142957 | 4.9984  | 2.0139  | -1.31147431 | 2.33E-09    | ** |
| siR_142958 | 1.2762  | 0.5594  | -1.18990228 | 0.005634656 | ** |
| siR_142969 | 104.152 | 57.8801 | -0.84755122 | 6.91E-82    |    |
| siR_142970 | 17.7959 | 8.8386  | -1.00965512 | 4.82E-20    | ** |
| siR_142971 | 4.6085  | 2.4987  | -0.88311955 | 3.17E-05    |    |
| siR_142972 | 4.4312  | 1.5663  | -1.50033688 | 4.91E-10    | ** |
| siR_142973 | 2.2688  | 1.0442  | -1.11953137 | 0.00040461  | ** |
| siR_142974 | 1.2762  | 0.8951  | -0.51173367 | 0.179854611 |    |
| siR_142975 | 1.3471  | 0.3729  | -1.85299625 | 8.02E-05    | ** |
| siR_142989 | 4.5021  | 1.9766  | -1.18757716 | 1.58E-07    | ** |
| siR_142990 | 1.5952  | 1.0442  | -0.61133925 | 0.07756025  |    |
| siR_143004 | 8.3307  | 3.3564  | -1.31152307 | 1.15E-14    | ** |
| siR_143005 | 1.1698  | 0.7086  | -0.72321852 | 0.080618428 |    |
| siR_143006 | 1.1698  | 0.5594  | -1.06430974 | 0.015477614 | *  |
| siR_14302  | 3.1196  | 2.0512  | -0.60489289 | 0.013995381 |    |
| siR_143024 | 2.0915  | 1.0442  | -1.00213993 | 0.001926451 | ** |
| siR_143059 | 0.01    | 5.2211  | 9.02820998  | 1.92E-44    | ** |
| siR_143060 | 0.01    | 3.5056  | 8.45351758  | 4.40E-30    | ** |

|            |          |          |             |             |    |
|------------|----------|----------|-------------|-------------|----|
| siR_143072 | 54.3802  | 22.4509  | -1.27630818 | 1.94E-83    | ** |
| siR_143073 | 20.4546  | 7.7198   | -1.40578995 | 2.26E-37    | ** |
| siR_143074 | 4.6794   | 2.4241   | -0.94887434 | 8.45E-06    |    |
| siR_143075 | 3.4386   | 1.5663   | -1.13446074 | 1.02E-05    | ** |
| siR_143076 | 5.2466   | 1.2307   | -2.09190368 | 1.51E-17    | ** |
| siR_143077 | 2.0915   | 0.8951   | -1.22441722 | 0.000267923 | ** |
| siR_143078 | 2.2333   | 0.8951   | -1.31905629 | 6.54E-05    | ** |
| siR_143079 | 2.9778   | 0.7459   | -1.99719273 | 5.14E-10    | ** |
| siR_143080 | 2.5169   | 0.5221   | -2.26924983 | 6.19E-10    | ** |
| siR_143088 | 91.4963  | 41.6945  | -1.13385632 | 1.07E-115   | ** |
| siR_143089 | 13.5064  | 5.6687   | -1.25255336 | 2.20E-21    | ** |
| siR_143090 | 6.0265   | 3.1327   | -0.94391376 | 4.75E-07    |    |
| siR_143091 | 3.2614   | 1.9393   | -0.7499554  | 0.002382611 |    |
| siR_143092 | 1.737    | 0.9696   | -0.84113615 | 0.014841839 |    |
| siR_143095 | 1.4534   | 0.4475   | -1.69947222 | 0.000111574 | ** |
| siR_143100 | 2.5524   | 1.268    | -1.00929969 | 0.000557949 | ** |
| siR_143101 | 1.737    | 0.6713   | -1.37156821 | 0.000295651 | ** |
| siR_143102 | 1.2762   | 0.5221   | -1.28945638 | 0.003202105 | ** |
| siR_143105 | 7.09     | 1.2307   | -2.5263065  | 9.44E-29    | ** |
| siR_143111 | 0.01     | 4.2142   | 8.71911497  | 5.16E-36    | ** |
| siR_143120 | 0.01     | 2.3122   | 7.85312238  | 4.30E-20    | ** |
| siR_143145 | 0.01     | 3.0954   | 8.27398204  | 1.20E-26    | ** |
| siR_143148 | 0.01     | 1.0442   | 6.70625425  | 1.77E-09    | ** |
| siR_143155 | 0.01     | 1.0069   | 6.6537766   | 3.63E-09    | ** |
| siR_143169 | 1.0989   | 0.1492   | -2.88074067 | 3.93E-06    | ** |
| siR_143177 | 4.3958   | 2.5733   | -0.77250609 | 0.000290834 |    |
| siR_143178 | 1.6661   | 0.4102   | -2.0220756  | 3.16E-06    | ** |
| siR_143182 | 425.5767 | 169.6498 | -1.32685944 | 0           | ** |
| siR_143183 | 21.0573  | 8.3911   | -1.32738861 | 2.39E-35    | ** |
| siR_143184 | 8.4016   | 3.3192   | -1.33982854 | 3.19E-15    | ** |
| siR_143185 | 5.2111   | 2.2749   | -1.19578481 | 1.39E-08    | ** |
| siR_143186 | 3.545    | 1.4545   | -1.28526233 | 7.63E-07    | ** |
| siR_143187 | 1.7016   | 1.0815   | -0.65385827 | 0.052814454 |    |
| siR_143189 | 1.028    | 0.4848   | -1.08437866 | 0.021479092 | *  |
| siR_143190 | 1.2053   | 0.4848   | -1.31393068 | 0.003684871 | ** |
| siR_143195 | 8.5789   | 4.2888   | -1.00021863 | 2.79E-10    | ** |
| siR_143222 | 13.1874  | 6.1162   | -1.10845267 | 1.69E-17    | ** |
| siR_143223 | 2.9778   | 1.4545   | -1.03372356 | 0.00014156  | ** |
| siR_143224 | 2.3042   | 0.5594   | -2.04231379 | 3.11E-08    | ** |
| siR_143231 | 2.0915   | 1.4918   | -0.48748387 | 0.09876211  |    |
| siR_143240 | 5.3175   | 2.0139   | -1.40075608 | 9.21E-11    | ** |
| siR_143252 | 1.028    | 0.2984   | -1.78452082 | 0.000827671 | ** |
| siR_143262 | 3.9704   | 1.7155   | -1.21065523 | 5.84E-07    | ** |
| siR_143263 | 0.01     | 1.268    | 6.98641094  | 2.37E-11    | ** |
| siR_143265 | 3.5095   | 2.4241   | -0.53381629 | 0.019795374 |    |
| siR_143275 | 35.9108  | 18.6842  | -0.942599   | 8.25E-35    |    |
| siR_143282 | 7.1254   | 4.7363   | -0.58921054 | 0.000274539 |    |

|            |          |          |             |             |    |
|------------|----------|----------|-------------|-------------|----|
| siR_143284 | 0.01     | 1.0442   | 6.70625425  | 1.77E-09    | ** |
| siR_143287 | 347.6577 | 191.6905 | -0.8588887  | 7.91E-275   |    |
| siR_143300 | 136.7659 | 68.9191  | -0.9887328  | 5.94E-138   |    |
| siR_143310 | 15.598   | 8.1301   | -0.94001605 | 6.07E-16    |    |
| siR_143316 | 1.6307   | 0.4102   | -1.991092   | 5.04E-06    | ** |
| siR_143319 | 96.1757  | 46.2444  | -1.05639375 | 1.41E-108   | ** |
| siR_143320 | 7.3027   | 3.2073   | -1.18707066 | 2.31E-11    | ** |
| siR_143321 | 2.2333   | 1.0069   | -1.14925665 | 0.000339181 | ** |
| siR_143322 | 2.4106   | 0.9323   | -1.37052611 | 1.93E-05    | ** |
| siR_143323 | 1.4534   | 0.4475   | -1.69947222 | 0.000111574 | ** |
| siR_143330 | 1.4534   | 0.7086   | -1.03638844 | 0.008088782 | ** |
| siR_143335 | 2.4815   | 1.4545   | -0.77068916 | 0.0067483   |    |
| siR_143345 | 50.0553  | 21.7423  | -1.20301827 | 2.69E-70    | ** |
| siR_143346 | 2.5169   | 0.9323   | -1.43278173 | 6.28E-06    | ** |
| siR_143347 | 1.1344   | 0.4475   | -1.34196985 | 0.004230483 | ** |
| siR_143355 | 3.2968   | 1.6036   | -1.03975205 | 5.69E-05    | ** |
| siR_143356 | 1.2762   | 0.4475   | -1.51189485 | 0.000890445 | ** |
| siR_143377 | 1.9497   | 0.4475   | -2.12329257 | 1.88E-07    | ** |
| siR_143383 | 40.1648  | 16.5212  | -1.28161321 | 1.72E-62    | ** |
| siR_143384 | 1.8788   | 0.634    | -1.56725675 | 3.20E-05    | ** |
| siR_143385 | 1.737    | 0.5221   | -1.73419969 | 1.76E-05    | ** |
| siR_143391 | 6.9127   | 2.9462   | -1.23039395 | 2.23E-11    | ** |
| siR_143398 | 6.8773   | 3.2073   | -1.10048297 | 1.03E-09    | ** |
| siR_143399 | 12.3366  | 3.17     | -1.96039009 | 3.42E-36    | ** |
| siR_143400 | 2.5878   | 0.7459   | -1.79467199 | 7.17E-08    | ** |
| siR_143413 | 1.6307   | 0.634    | -1.36293665 | 0.000487944 | ** |
| siR_143414 | 1.1344   | 0.1865   | -2.6046819  | 8.62E-06    | ** |
| siR_143417 | 0.01     | 1.1561   | 6.85312238  | 2.05E-10    | ** |
| siR_143436 | 1.7725   | 0.4102   | -2.11138623 | 7.60E-07    | ** |
| siR_143439 | 1.028    | 0.4102   | -1.32544087 | 0.007079856 | ** |
| siR_143466 | 0.01     | 1.2307   | 6.94333532  | 4.86E-11    | ** |
| siR_143528 | 0.01     | 1.3426   | 7.06888574  | 5.63E-12    | ** |
| siR_143530 | 2.6587   | 3.9904   | 0.58581237  | 0.006664048 |    |
| siR_143532 | 40.732   | 24.0545  | -0.75985584 | 1.04E-27    |    |
| siR_143534 | 7.6217   | 7.5334   | -0.01681169 | 0.90668907  |    |
| siR_143535 | 1.1344   | 0.5967   | -0.92685176 | 0.033495577 |    |
| siR_143544 | 1.028    | 0.0746   | -3.78452082 | 4.98E-07    | ** |
| siR_14355  | 9.4651   | 8.5776   | -0.14204371 | 0.274479274 |    |
| siR_143564 | 299.0558 | 267.77   | -0.15942036 | 5.58E-12    |    |
| siR_143565 | 2.6942   | 3.0581   | 0.18277863  | 0.426145924 |    |
| siR_143570 | 84.619   | 64.7049  | -0.38710667 | 1.22E-17    |    |
| siR_143572 | 1.418    | 0.8578   | -0.72514431 | 0.053278736 |    |
| siR_143576 | 51.1543  | 49.1906  | -0.05647286 | 0.304439805 |    |
| siR_14358  | 109.5404 | 79.063   | -0.47038845 | 2.24E-31    |    |
| siR_143594 | 4.8921   | 5.967    | 0.28655188  | 0.0870577   |    |
| siR_1436   | 1.4889   | 0.4848   | -1.61878526 | 0.000157192 | ** |
| siR_143610 | 4.3958   | 1.5663   | -1.48876518 | 7.21E-10    | ** |



|            |          |          |             |             |    |
|------------|----------|----------|-------------|-------------|----|
| siR_143613 | 1.418    | 0.4475   | -1.66389794 | 0.000170776 | ** |
| siR_143619 | 0.01     | 1.3799   | 7.10841991  | 2.74E-12    | ** |
| siR_143623 | 0.8153   | 1.0815   | 0.40763075  | 0.312975092 |    |
| siR_14365  | 49.2754  | 36.8836  | -0.41788811 | 2.46E-12    |    |
| siR_14366  | 2.0206   | 1.2307   | -0.71530462 | 0.022165921 |    |
| siR_143680 | 1.0989   | 0.4848   | -1.1805985  | 0.010852128 | *  |
| siR_143684 | 12.1948  | 14.6192  | 0.26159827  | 0.014015534 |    |
| siR_143685 | 1.2053   | 1.6409   | 0.44509504  | 0.176633357 |    |
| siR_143686 | 1.8788   | 0.8951   | -1.06969073 | 0.001948509 | ** |
| siR_14369  | 40.5193  | 21.1829  | -0.93570914 | 1.32E-38    |    |
| siR_14370  | 3.6159   | 0.7086   | -2.35131141 | 3.08E-14    | ** |
| siR_143704 | 5.7429   | 2.2376   | -1.35982728 | 4.54E-11    | ** |
| siR_143707 | 1.5243   | 0.3729   | -2.03128617 | 7.99E-06    | ** |
| siR_14371  | 2.3042   | 0.3356   | -2.77945132 | 3.20E-11    | ** |
| siR_143723 | 0.8508   | 1.2307   | 0.53258719  | 0.168826213 |    |
| siR_143754 | 1.6307   | 0.7086   | -1.20244802 | 0.001551793 | ** |
| siR_143768 | 1.4889   | 1.7155   | 0.20438227  | 0.507014543 |    |
| siR_143769 | 1.3116   | 1.4172   | 0.11171556  | 0.736624307 |    |
| siR_14377  | 25.2404  | 10.2931  | -1.29405723 | 1.73E-40    | ** |
| siR_143770 | 12.5847  | 10.9271  | -0.20376026 | 0.073490392 |    |
| siR_143772 | 3.545    | 2.4241   | -0.54833641 | 0.01641293  |    |
| siR_143773 | 2.5169   | 1.1934   | -1.07657022 | 0.000303277 | ** |
| siR_143774 | 1.3825   | 0.8205   | -0.75270424 | 0.048742451 |    |
| siR_143776 | 1.0635   | 1.268    | 0.25373471  | 0.483433973 |    |
| siR_14378  | 1.1344   | 0.2984   | -1.92661    | 0.000211792 | ** |
| siR_143793 | 1.0635   | 0.7086   | -0.58577666 | 0.167596979 |    |
| siR_143814 | 1.0989   | 0.5221   | -1.07366204 | 0.018227899 | *  |
| siR_143816 | 3.3677   | 1.1934   | -1.49668594 | 6.40E-08    | ** |
| siR_143817 | 0.01     | 11.0763  | 10.11326032 | 1.87E-93    | ** |
| siR_143831 | 2.5878   | 1.1934   | -1.11664844 | 0.000160985 | ** |
| siR_143834 | 1.5243   | 0.2611   | -2.54547251 | 3.07E-07    | ** |
| siR_143857 | 1.4889   | 0.8578   | -0.79553364 | 0.031782142 |    |
| siR_143869 | 2.0206   | 0.9323   | -1.11591758 | 0.00088024  | ** |
| siR_143874 | 0.01     | 1.2307   | 6.94333532  | 4.86E-11    | ** |
| siR_143884 | 54.4866  | 32.2592  | -0.75619081 | 3.24E-36    |    |
| siR_143885 | 1.2762   | 0.5594   | -1.18990228 | 0.005634656 | ** |
| siR_143890 | 4.6085   | 6.9367   | 0.58995224  | 0.000314042 |    |
| siR_143900 | 0.01     | 40.5384  | 11.98507343 | 0           | ** |
| siR_143901 | 0.01     | 1.6409   | 7.35834351  | 1.79E-14    | ** |
| siR_143904 | 12.6202  | 11.1136  | -0.18340855 | 0.105467452 |    |
| siR_143911 | 18.0795  | 18.0875  | 0.00063824  | 0.993549634 |    |
| siR_143916 | 560.3574 | 385.4694 | -0.53973094 | 3.67E-196   |    |
| siR_143917 | 150.3433 | 134.3698 | -0.16205165 | 6.94E-07    |    |
| siR_143918 | 0.8862   | 1.5663   | 0.82165633  | 0.022681615 |    |
| siR_143943 | 2.4106   | 0.7832   | -1.62193961 | 1.30E-06    | ** |
| siR_143944 | 1.5952   | 0.8951   | -0.83361654 | 0.020601448 |    |
| siR_143949 | 3.5095   | 1.6409   | -1.09677818 | 1.43E-05    | ** |

|            |         |         |             |             |    |
|------------|---------|---------|-------------|-------------|----|
| siR_143951 | 0.01    | 1.268   | 6.98641094  | 2.37E-11    | ** |
| siR_143956 | 28.9272 | 15.1786 | -0.93038795 | 8.75E-28    |    |
| siR_143962 | 0.01    | 3.0581  | 8.25649177  | 2.46E-26    | ** |
| siR_143978 | 1.0989  | 0.3356  | -1.71124549 | 0.000775199 | ** |
| siR_143987 | 3.7577  | 2.8343  | -0.40685742 | 0.060228086 |    |
| siR_143988 | 2.6942  | 2.163   | -0.31682329 | 0.209136914 |    |
| siR_143993 | 1.737   | 0.6713  | -1.37156821 | 0.000295651 | ** |
| siR_144028 | 3.5804  | 0.8205  | -2.12554553 | 1.23E-12    | ** |
| siR_14403  | 0.01    | 1.9393  | 7.59939219  | 5.69E-17    | ** |
| siR_144035 | 0.01    | 4.2888  | 8.74443023  | 1.22E-36    | ** |
| siR_144039 | 0.01    | 2.163   | 7.75688986  | 7.63E-19    | ** |
| siR_144060 | 0.7799  | 1.0069  | 0.36855935  | 0.375328145 |    |
| siR_144072 | 0.01    | 2.9462  | 8.20271156  | 2.12E-25    | ** |
| siR_144074 | 0.01    | 9.2862  | 9.85894454  | 1.80E-78    | ** |
| siR_144079 | 0.01    | 5.8551  | 9.19355     | 9.47E-50    | ** |
| siR_144091 | 7.6217  | 5.9297  | -0.36215371 | 0.016110596 |    |
| siR_144094 | 21.7308 | 20.2879 | -0.09912175 | 0.243786602 |    |
| siR_144097 | 5.991   | 6.0043  | 0.00319923  | 0.982516993 |    |
| siR_144098 | 4.6794  | 4.2515  | -0.13835162 | 0.45516859  |    |
| siR_144102 | 3.4032  | 5.7805  | 0.76430235  | 3.57E-05    |    |
| siR_144113 | 1.1344  | 0.7086  | -0.67888607 | 0.103795176 |    |
| siR_144114 | 19.4975 | 9.9202  | -0.97484804 | 1.13E-20    |    |
| siR_144126 | 1.8434  | 0.5221  | -1.81997109 | 4.74E-06    | ** |
| siR_144135 | 0.01    | 1.8274  | 7.51364865  | 4.92E-16    | ** |
| siR_144136 | 0.01    | 1.7901  | 7.48389637  | 1.01E-15    | ** |
| siR_144137 | 0.01    | 1.4918  | 7.22091032  | 3.17E-13    | ** |
| siR_144157 | 0.01    | 2.8716  | 8.16571099  | 8.93E-25    | ** |
| siR_144168 | 2.6942  | 1.902   | -0.5023397  | 0.053729201 |    |
| siR_14417  | 5.6011  | 2.0139  | -1.47571814 | 4.64E-12    | ** |
| siR_144180 | 1.1344  | 1.4918  | 0.39512469  | 0.248761635 |    |
| siR_144184 | 1.6661  | 0.8205  | -1.02189976 | 0.004996607 | ** |
| siR_144252 | 0.01    | 2.3122  | 7.85312238  | 4.30E-20    | ** |
| siR_144271 | 1.9497  | 1.3053  | -0.57887073 | 0.062635311 |    |
| siR_144275 | 3.6868  | 2.4987  | -0.56119146 | 0.012441485 |    |
| siR_144310 | 1.0989  | 1.1188  | 0.02589205  | 0.941336795 |    |
| siR_144311 | 1.2053  | 0.5594  | -1.10744012 | 0.01113063  | *  |
| siR_144317 | 1.8434  | 0.2611  | -2.81969479 | 2.43E-09    | ** |
| siR_144334 | 2.7296  | 0.8205  | -1.73411431 | 6.49E-08    | ** |
| siR_144353 | 0.01    | 1.268   | 6.98641094  | 2.37E-11    | ** |
| siR_144361 | 1.737   | 0.0373  | -5.54127831 | 1.58E-13    | ** |
| siR_144364 | 0.01    | 18.6842 | 10.86760308 | 3.86E-157   | ** |
| siR_144371 | 0.01    | 7.7198  | 9.59241966  | 2.33E-65    | ** |
| siR_144385 | 0.01    | 1.529   | 7.2564446   | 1.55E-13    | ** |
| siR_144416 | 0.01    | 26.8889 | 11.39279502 | 8.07E-226   | ** |
| siR_144419 | 1.5598  | 0.2238  | -2.80107912 | 4.88E-08    | ** |
| siR_144421 | 5.672   | 1.0815  | -2.39082387 | 6.04E-22    | ** |
| siR_144428 | 2.9069  | 4.1769  | 0.52295116  | 0.012225114 |    |

|            |         |         |             |             |    |
|------------|---------|---------|-------------|-------------|----|
| siR_144430 | 0.01    | 1.6036  | 7.32517051  | 3.67E-14    | ** |
| siR_144433 | 0.01    | 5.5568  | 9.11811051  | 2.98E-47    | ** |
| siR_144452 | 0.01    | 17.6773 | 10.78768222 | 1.04E-148   | ** |
| siR_144457 | 1.418   | 0.7459  | -0.9268034  | 0.017122488 |    |
| siR_144500 | 12.9747 | 6.0416  | -1.10269861 | 4.13E-17    | ** |
| siR_144526 | 1.5243  | 0.1119  | -3.76786493 | 6.89E-10    | ** |
| siR_144527 | 0.01    | 1.7155  | 7.42248532  | 4.25E-15    | ** |
| siR_144528 | 0.709   | 1.3053  | 0.88052389  | 0.027582602 |    |
| siR_144530 | 1.2053  | 0.7459  | -0.69233815 | 0.087734995 |    |
| siR_144540 | 5.6365  | 3.0581  | -0.88216401 | 4.22E-06    |    |
| siR_144545 | 0.01    | 1.1188  | 6.80580835  | 4.20E-10    | ** |
| siR_144550 | 5.3175  | 1.4545  | -1.87022483 | 1.54E-15    | ** |
| siR_14456  | 0.01    | 1.4545  | 7.18437949  | 6.51E-13    | ** |
| siR_144562 | 0.01    | 1.268   | 6.98641094  | 2.37E-11    | ** |
| siR_144565 | 0.01    | 1.268   | 6.98641094  | 2.37E-11    | ** |
| siR_144571 | 0.01    | 2.6852  | 8.06888574  | 3.25E-23    | ** |
| siR_144573 | 0.01    | 5.2211  | 9.02820998  | 1.92E-44    | ** |
| siR_144578 | 0.01    | 2.4241  | 7.9213054   | 4.98E-21    | ** |
| siR_144583 | 5.1402  | 3.5056  | -0.5521631  | 0.003591502 |    |
| siR_144599 | 12.9392 | 4.3634  | -1.56822378 | 3.28E-28    | ** |
| siR_144615 | 1.2762  | 1.0815  | -0.23882077 | 0.512575605 |    |
| siR_144626 | 2.0561  | 1.3053  | -0.65552901 | 0.032588518 |    |
| siR_144627 | 1.6661  | 0.9696  | -0.78101339 | 0.025220231 |    |
| siR_144642 | 1.7016  | 0.3729  | -2.19003124 | 7.23E-07    | ** |
| siR_144643 | 1.8788  | 0.5967  | -1.65473382 | 1.53E-05    | ** |
| siR_144647 | 2.3751  | 1.1561  | -1.03872206 | 0.000656756 | ** |
| siR_144670 | 6.2392  | 1.3799  | -2.17679734 | 1.41E-21    | ** |
| siR_144679 | 6.381   | 3.5802  | -0.83374235 | 3.06E-06    |    |
| siR_144683 | 2.0206  | 1.6409  | -0.30029643 | 0.302251247 |    |
| siR_144693 | 0.01    | 8.3165  | 9.69983269  | 2.36E-70    | ** |
| siR_144696 | 3.8286  | 1.7155  | -1.15818781 | 2.18E-06    | ** |
| siR_144708 | 1.737   | 0.6713  | -1.37156821 | 0.000295651 | ** |
| siR_14475  | 0.5317  | 1.0442  | 0.97371369  | 0.032467048 |    |
| siR_144751 | 6.1328  | 3.17    | -0.95206306 | 3.10E-07    |    |
| siR_144759 | 2.9069  | 1.9393  | -0.58394544 | 0.021594203 |    |
| siR_144760 | 2.3397  | 1.4172  | -0.72328019 | 0.012838607 |    |
| siR_144761 | 1.4534  | 0.4848  | -1.58397021 | 0.000237648 | ** |
| siR_144768 | 1.8079  | 1.1934  | -0.5992372  | 0.064599474 |    |
| siR_144772 | 1.2762  | 0.5221  | -1.28945638 | 0.003202105 | ** |
| siR_144788 | 5.8492  | 4.3634  | -0.42278659 | 0.014946081 |    |
| siR_144789 | 24.7795 | 16.4839 | -0.58808946 | 1.17E-11    |    |
| siR_144792 | 2.0561  | 2.163   | 0.07312323  | 0.783461142 |    |
| siR_144793 | 1.1344  | 0.2611  | -2.11925507 | 8.17E-05    | ** |
| siR_144795 | 1.3471  | 1.1561  | -0.22059076 | 0.53282973  |    |
| siR_144798 | 1.3471  | 0.6713  | -1.0048274  | 0.013015658 | *  |
| siR_144816 | 31.7986 | 8.0555  | -1.98091721 | 7.25E-92    | ** |
| siR_144825 | 0.01    | 1.1561  | 6.85312238  | 2.05E-10    | ** |

|            |         |         |             |             |    |
|------------|---------|---------|-------------|-------------|----|
| siR_144855 | 23.6097 | 11.0763 | -1.09190368 | 2.06E-29    | ** |
| siR_144861 | 31.0187 | 15.7007 | -0.98230934 | 2.50E-32    |    |
| siR_144865 | 1.3825  | 0.5594  | -1.30532732 | 0.001931693 | ** |
| siR_144879 | 1.5952  | 0.4102  | -1.95933792 | 8.02E-06    | ** |
| siR_144889 | 2.8005  | 1.2307  | -1.1862053  | 3.76E-05    | ** |
| siR_144938 | 0.01    | 1.7528  | 7.45351758  | 2.07E-15    | ** |
| siR_144940 | 0.01    | 1.3426  | 7.06888574  | 5.63E-12    | ** |
| siR_144953 | 0.9217  | 1.3426  | 0.54266039  | 0.143602431 |    |
| siR_144960 | 4.0058  | 2.6479  | -0.59724175 | 0.005844677 |    |
| siR_144984 | 0.5317  | 1.7155  | 1.68994475  | 2.47E-05    | ** |
| siR_144989 | 1.028   | 0.8205  | -0.32526503 | 0.431150137 |    |
| siR_14499  | 3.3323  | 1.6409  | -1.02203097 | 6.60E-05    | ** |
| siR_144990 | 1.4534  | 0.1865  | -2.96218428 | 6.23E-08    | ** |
| siR_144991 | 4.8921  | 1.8647  | -1.39151035 | 6.33E-10    | ** |
| siR_144999 | 5.4593  | 7.6825  | 0.49285988  | 0.001271633 |    |
| siR_145005 | 1.7016  | 1.6036  | -0.08557762 | 0.781632893 |    |
| siR_145006 | 10.2096 | 5.6314  | -0.85836081 | 1.38E-09    |    |
| siR_145010 | 2.4106  | 1.9393  | -0.31385628 | 0.239317058 |    |
| siR_145011 | 3.3323  | 2.7225  | -0.29158624 | 0.196039184 |    |
| siR_145012 | 4.0058  | 5.4449  | 0.44281516  | 0.013994008 |    |
| siR_145052 | 1.418   | 0.4848  | -1.54839593 | 0.00035749  | ** |
| siR_145053 | 1.9852  | 1.0815  | -0.87625069 | 0.006940346 |    |
| siR_145056 | 0.01    | 6.1162  | 9.25649177  | 6.18E-52    | ** |
| siR_145062 | 0.01    | 24.6512 | 11.26744216 | 4.34E-207   | ** |
| siR_145075 | 0.01    | 1.268   | 6.98641094  | 2.37E-11    | ** |
| siR_145098 | 2.7296  | 2.163   | -0.33565589 | 0.181790146 |    |
| siR_145102 | 0.01    | 1.0442  | 6.70625425  | 1.77E-09    | ** |
| siR_145138 | 2.7296  | 0.9323  | -1.54982338 | 6.11E-07    | ** |
| siR_145143 | 0.01    | 1.8274  | 7.51364865  | 4.92E-16    | ** |
| siR_145159 | 1.0989  | 0.2611  | -2.07338574 | 0.000132441 | ** |
| siR_145161 | 3.0841  | 1.4172  | -1.12180617 | 3.48E-05    | ** |
| siR_145173 | 9.3588  | 8.0182  | -0.22304515 | 0.092380839 |    |
| siR_145248 | 2.127   | 0.3356  | -2.66400541 | 4.73E-10    | ** |
| siR_145251 | 1.0635  | 0.3356  | -1.66400541 | 0.001193189 | ** |
| siR_145253 | 0.01    | 2.1258  | 7.73186206  | 1.57E-18    | ** |
| siR_145258 | 1.4889  | 0.6713  | -1.14921731 | 0.003563263 | ** |
| siR_145268 | 14.1091 | 7.3096  | -0.9487616  | 9.12E-15    |    |
| siR_145271 | 1.3825  | 1.6036  | 0.21403484  | 0.50264256  |    |
| siR_145275 | 0.01    | 1.0442  | 6.70625425  | 1.77E-09    | ** |
| siR_14532  | 0.01    | 1.529   | 7.2564446   | 1.55E-13    | ** |
| siR_145375 | 1.3825  | 0.5594  | -1.30532732 | 0.001931693 | ** |
| siR_145379 | 3.0132  | 0.7086  | -2.08825306 | 1.23E-10    | ** |
| siR_145385 | 1.3471  | 0.7086  | -0.92681358 | 0.020219118 |    |
| siR_145386 | 1.7016  | 0.2984  | -2.5115725  | 7.61E-08    | ** |
| siR_145387 | 19.6393 | 4.6617  | -2.07481544 | 7.30E-61    | ** |
| siR_145398 | 0.01    | 28.0077 | 11.4516078  | 3.48E-235   | ** |
| siR_1454   | 1.2407  | 0.8578  | -0.53244109 | 0.170484507 |    |

|            |         |         |             |             |    |
|------------|---------|---------|-------------|-------------|----|
| siR_145401 | 0.01    | 4.065   | 8.66711154  | 9.14E-35    | ** |
| siR_145425 | 5.282   | 6.7129  | 0.34585185  | 0.030161427 |    |
| siR_145427 | 75.6857 | 39.0467 | -0.95482012 | 5.99E-73    |    |
| siR_145430 | 23.5388 | 17.7146 | -0.41010188 | 1.97E-06    |    |
| siR_145431 | 1.028   | 0.4475  | -1.19988068 | 0.012673013 | *  |
| siR_145434 | 1.5598  | 2.5733  | 0.7222586   | 0.008804047 |    |
| siR_145436 | 0.6381  | 1.3053  | 1.03252698  | 0.011897015 | *  |
| siR_145441 | 0.01    | 16.372  | 10.67701486 | 8.74E-138   | ** |
| siR_145468 | 41.9727 | 14.6565 | -1.51791065 | 9.73E-84    | ** |
| siR_145469 | 3.2968  | 1.1561  | -1.51180018 | 7.08E-08    | ** |
| siR_145485 | 0.01    | 2.0512  | 7.68032436  | 6.59E-18    | ** |
| siR_14552  | 91.8863 | 90.7733 | -0.01758177 | 0.666267692 |    |
| siR_145541 | 1.028   | 0.2984  | -1.78452082 | 0.000827671 | ** |
| siR_14555  | 21.0573 | 12.3443 | -0.77047543 | 2.09E-15    |    |
| siR_14556  | 4.9984  | 4.4753  | -0.15948196 | 0.374969616 |    |
| siR_145567 | 0.01    | 2.536   | 7.98641094  | 5.76E-22    | ** |
| siR_145586 | 3.2259  | 1.3426  | -1.26467217 | 3.23E-06    | ** |
| siR_145587 | 1.8788  | 1.1188  | -0.74785934 | 0.021928453 |    |
| siR_145594 | 1.9852  | 0.8578  | -1.21057114 | 0.000435901 | ** |
| siR_145595 | 1.3116  | 0.7086  | -0.88828444 | 0.027066419 |    |
| siR_145597 | 0.01    | 3.4683  | 8.43808488  | 9.04E-30    | ** |
| siR_145598 | 0.01    | 1.7155  | 7.42248532  | 4.25E-15    | ** |
| siR_14560  | 15.8816 | 23.0103 | 0.53492353  | 1.82E-09    |    |
| siR_145608 | 0.01    | 5.2584  | 9.03848008  | 9.36E-45    | ** |
| siR_14561  | 8.3307  | 10.405  | 0.32076733  | 0.011899784 |    |
| siR_145619 | 4.6085  | 3.0581  | -0.59166167 | 0.003355963 |    |
| siR_145624 | 30.8769 | 20.5489 | -0.58746675 | 3.82E-14    |    |
| siR_145625 | 1.2762  | 1.0069  | -0.34193403 | 0.356452408 |    |
| siR_145631 | 11.3085 | 13.1647 | 0.21926707  | 0.049000797 |    |
| siR_145639 | 3.0487  | 1.9393  | -0.65265819 | 0.009349617 |    |
| siR_145669 | 1.9143  | 1.2307  | -0.63733781 | 0.044427898 |    |
| siR_145693 | 2.6233  | 1.529   | -0.7787944  | 0.004932752 |    |
| siR_145694 | 0.01    | 1.0442  | 6.70625425  | 1.77E-09    | ** |
| siR_145697 | 0.01    | 2.1258  | 7.73186206  | 1.57E-18    | ** |
| siR_145729 | 1.028   | 0.3356  | -1.61502564 | 0.001825058 | ** |
| siR_14575  | 2.446   | 2.0885  | -0.22795726 | 0.382358256 |    |
| siR_145756 | 16.8387 | 8.5403  | -0.97942211 | 3.43E-18    |    |
| siR_145760 | 12.7265 | 6.3027  | -1.01379381 | 7.47E-15    | ** |
| siR_145763 | 1.2407  | 0.7086  | -0.80811094 | 0.047445627 |    |
| siR_145766 | 4.573   | 0.8951  | -2.35302015 | 1.17E-17    | ** |
| siR_145860 | 1.3116  | 0.2238  | -2.55104587 | 2.11E-06    | ** |
| siR_145862 | 4.0767  | 1.3053  | -1.64302037 | 1.85E-10    | ** |
| siR_145877 | 0.01    | 2.4241  | 7.9213054   | 4.98E-21    | ** |
| siR_145881 | 0.01    | 5.2211  | 9.02820998  | 1.92E-44    | ** |
| siR_145896 | 1.2407  | 0.8578  | -0.53244109 | 0.170484507 |    |
| siR_145900 | 5.4238  | 3.5802  | -0.5992638  | 0.001280166 |    |
| siR_145914 | 9.4651  | 4.5499  | -1.05678291 | 4.06E-12    | ** |

|            |          |          |              |              |    |
|------------|----------|----------|--------------|--------------|----|
| siR_145935 | 1. 5598  | 0. 2238  | -2. 80107912 | 4. 88E-08    | ** |
| siR_145956 | 0. 01    | 1. 0815  | 6. 75688986  | 8. 62E-10    | ** |
| siR_145969 | 1. 9852  | 0. 634   | -1. 64672961 | 9. 33E-06    | ** |
| siR_145999 | 3. 8286  | 1. 529   | -1. 32422853 | 1. 44E-07    | ** |
| siR_146003 | 3. 1196  | 1. 3053  | -1. 25697963 | 5. 22E-06    | ** |
| siR_146067 | 5. 5656  | 7. 2723  | 0. 38587449  | 0. 012407979 |    |
| siR_146069 | 2. 6587  | 1. 2307  | -1. 11124187 | 0. 000138623 | ** |
| siR_14607  | 0. 01    | 24. 0172 | 11. 22985225 | 8. 80E-202   | ** |
| siR_146076 | 0. 01    | 6. 1908  | 9. 27398204  | 1. 47E-52    | ** |
| siR_146087 | 1. 028   | 0. 4848  | -1. 08437866 | 0. 021479092 | *  |
| siR_14610  | 0. 01    | 3. 6548  | 8. 51364865  | 2. 48E-31    | ** |
| siR_146118 | 1. 1344  | 1. 4545  | 0. 35859386  | 0. 298164822 |    |
| siR_146149 | 4. 6085  | 3. 5429  | -0. 37936651 | 0. 051017405 |    |
| siR_146154 | 3. 8995  | 1. 529   | -1. 35070074 | 7. 03E-08    | ** |
| siR_146155 | 6. 7355  | 2. 4614  | -1. 45230592 | 6. 45E-14    | ** |
| siR_146158 | 1. 5598  | 0. 2611  | -2. 57868669 | 1. 81E-07    | ** |
| siR_146167 | 3. 2614  | 0. 8578  | -1. 92677817 | 2. 08E-10    | ** |
| siR_146169 | 2. 9069  | 0. 8951  | -1. 69936067 | 3. 77E-08    | ** |
| siR_146185 | 7. 3027  | 2. 4614  | -1. 56895084 | 1. 37E-16    | ** |
| siR_14619  | 1. 6661  | 1. 0815  | -0. 62344133 | 0. 066287572 |    |
| siR_146192 | 0. 01    | 3. 7294  | 8. 54279973  | 5. 90E-32    | ** |
| siR_146229 | 0. 01    | 1. 4545  | 7. 18437949  | 6. 51E-13    | ** |
| siR_146231 | 14. 5699 | 7. 6079  | -0. 93742079 | 6. 29E-15    |    |
| siR_146232 | 12. 5138 | 6. 5637  | -0. 93093875 | 6. 78E-13    |    |
| siR_146249 | 1. 8788  | 1. 2307  | -0. 61033237 | 0. 055396282 |    |
| siR_14625  | 1. 4534  | 0. 4848  | -1. 58397021 | 0. 000237648 | ** |
| siR_146254 | 0. 01    | 4. 4753  | 8. 80584059  | 3. 37E-38    | ** |
| siR_146256 | 0. 01    | 3. 8786  | 8. 59939219  | 3. 33E-33    | ** |
| siR_146259 | 0. 01    | 1. 9393  | 7. 59939219  | 5. 69E-17    | ** |
| siR_14626  | 4. 7857  | 0. 9696  | -2. 30326836 | 5. 48E-18    | ** |
| siR_146263 | 0. 01    | 11. 5238 | 10. 17040081 | 3. 35E-97    | ** |
| siR_146296 | 0. 01    | 2. 163   | 7. 75688986  | 7. 63E-19    | ** |
| siR_146425 | 0. 01    | 15. 738  | 10. 6200365  | 1. 77E-132   | ** |
| siR_146435 | 1. 9143  | 1. 3799  | -0. 47225322 | 0. 12532649  |    |
| siR_146452 | 1. 1698  | 0. 8951  | -0. 38614112 | 0. 322692255 |    |
| siR_14646  | 3. 8995  | 3. 3192  | -0. 23245359 | 0. 259701347 |    |
| siR_146479 | 0. 01    | 1. 4172  | 7. 14689956  | 1. 34E-12    | ** |
| siR_14648  | 14. 2509 | 10. 1439 | -0. 49044061 | 1. 29E-05    |    |
| siR_146503 | 13. 7191 | 4. 2888  | -1. 6775399  | 1. 12E-32    | ** |
| siR_146504 | 1. 8079  | 0. 8578  | -1. 07560166 | 0. 002277255 | ** |
| siR_146505 | 2. 0206  | 0. 5594  | -1. 85283159 | 1. 21E-06    | ** |
| siR_146506 | 1. 418   | 0. 3356  | -2. 07904291 | 1. 26E-05    | ** |
| siR_146527 | 3. 0841  | 3. 2446  | 0. 07319109  | 0. 736979369 |    |
| siR_146544 | 0. 01    | 43. 7457 | 12. 0949255  | 0            | ** |
| siR_146552 | 0. 01    | 50. 3467 | 12. 2976815  | 0            | ** |
| siR_146560 | 0. 01    | 41. 9556 | 12. 03464767 | 0            | ** |
| siR_14660  | 0. 9571  | 1. 1561  | 0. 27252462  | 0. 474167388 |    |

|            |          |           |             |             |    |
|------------|----------|-----------|-------------|-------------|----|
| siR_146628 | 3.2614   | 0.8578    | -1.92677817 | 2.08E-10    | ** |
| siR_14665  | 12.7265  | 6.974     | -0.86777744 | 8.60E-12    |    |
| siR_146692 | 1.028    | 0.5967    | -0.78476258 | 0.079326488 |    |
| siR_146708 | 2.6587   | 1.0815    | -1.29768733 | 1.66E-05    | ** |
| siR_146730 | 0.01     | 4.4007    | 8.78158921  | 1.42E-37    | ** |
| siR_146753 | 3.4741   | 3.4683    | -0.00241059 | 0.992819923 |    |
| siR_146764 | 17.7959  | 10.8152   | -0.71848455 | 6.69E-12    |    |
| siR_146766 | 1.0635   | 0.5594    | -0.92686787 | 0.039728581 |    |
| siR_146788 | 3.7931   | 1.3053    | -1.53899598 | 4.59E-09    | ** |
| siR_146829 | 3.6868   | 3.0581    | -0.26973357 | 0.206489388 |    |
| siR_146835 | 0.01     | 4.3634    | 8.76930892  | 2.91E-37    | ** |
| siR_146855 | 6.0619   | 1.6409    | -1.88528273 | 1.09E-17    | ** |
| siR_146912 | 2.9423   | 2.2003    | -0.41924411 | 0.08769642  |    |
| siR_146925 | 0.01     | 55.3068   | 12.43324116 | 0           | ** |
| siR_14693  | 0.01     | 1.7155    | 7.42248532  | 4.25E-15    | ** |
| siR_146934 | 0.01     | 11.8222   | 10.20728282 | 1.07E-99    | ** |
| siR_146939 | 0.01     | 35.4665   | 11.79224125 | 1.27E-297   | ** |
| siR_146943 | 5839.671 | 2802.1865 | -1.05933411 | 0           | ** |
| siR_146944 | 56.9326  | 22.0407   | -1.36908494 | 5.17E-97    | ** |
| siR_146945 | 74.9412  | 17.3789   | -2.10842231 | 7.75E-232   | ** |
| siR_146946 | 32.5076  | 12.1578   | -1.41889486 | 3.43E-59    | ** |
| siR_146947 | 4.9984   | 1.8647    | -1.42252282 | 2.10E-10    | ** |
| siR_146948 | 2.4106   | 0.9696    | -1.31393068 | 3.51E-05    | ** |
| siR_146949 | 2.4106   | 0.4848    | -2.31393068 | 9.19E-10    | ** |
| siR_146954 | 1.2762   | 1.529     | 0.26073397  | 0.429357014 |    |
| siR_146955 | 5.991    | 1.8647    | -1.68385329 | 3.45E-15    | ** |
| siR_146958 | 1.0989   | 1.1188    | 0.02589205  | 0.941336795 |    |
| siR_146963 | 0.8862   | 1.0815    | 0.28732943  | 0.466872116 |    |
| siR_146965 | 4.3249   | 2.4987    | -0.79148908 | 0.000242691 |    |
| siR_146969 | 1.418    | 1.3799    | -0.03929381 | 0.908620659 |    |
| siR_146994 | 8.0117   | 2.797     | -1.51822815 | 2.78E-17    | ** |
| siR_147002 | 1.418    | 0.1865    | -2.92661    | 1.09E-07    | ** |
| siR_147031 | 1.1698   | 0.9696    | -0.27080029 | 0.47987045  |    |
| siR_147033 | 1.6661   | 0.5221    | -1.67407693 | 4.12E-05    | ** |
| siR_147040 | 0.01     | 3.8786    | 8.59939219  | 3.33E-33    | ** |
| siR_147063 | 0.01     | 1.5663    | 7.29121675  | 7.54E-14    | ** |
| siR_14707  | 1.418    | 1.0069    | -0.49393712 | 0.170608303 |    |
| siR_147079 | 0.01     | 8.503     | 9.73182813  | 6.48E-72    | ** |
| siR_14708  | 4.8921   | 1.8274    | -1.42066143 | 3.40E-10    | ** |
| siR_147088 | 0.01     | 1.7155    | 7.42248532  | 4.25E-15    | ** |
| siR_147110 | 1.3116   | 0.8578    | -0.61261459 | 0.109565176 |    |
| siR_147157 | 0.01     | 1.3053    | 7.02823761  | 1.15E-11    | ** |
| siR_147180 | 1.4534   | 0.9696    | -0.58397021 | 0.106236151 |    |
| siR_1472   | 1.9852   | 1.1934    | -0.73420668 | 0.020388005 |    |
| siR_147200 | 1.3825   | 0.8578    | -0.68856626 | 0.068256577 |    |
| siR_147283 | 1.2407   | 0.4102    | -1.59675492 | 0.000655154 | ** |
| siR_147302 | 1.418    | 0.634     | -1.16130279 | 0.004153001 | ** |

|            |          |         |             |             |    |
|------------|----------|---------|-------------|-------------|----|
| siR_147312 | 9.3233   | 5.967   | -0.64383491 | 6.58E-06    |    |
| siR_147318 | 0.01     | 5.5941  | 9.12776223  | 1.45E-47    | ** |
| siR_147331 | 1.0635   | 0.8951  | -0.24869926 | 0.535296857 |    |
| siR_147334 | 1.028    | 0.4475  | -1.19988068 | 0.012673013 | *  |
| siR_147359 | 4.8212   | 1.3426  | -1.84436273 | 5.56E-14    | ** |
| siR_147400 | 6.8418   | 2.1258  | -1.68637006 | 3.56E-17    | ** |
| siR_147405 | 2.6942   | 2.1258  | -0.34185108 | 0.177130031 |    |
| siR_147410 | 1.5243   | 0.634   | -1.26559212 | 0.001459604 | ** |
| siR_147441 | 1.5243   | 0.6713  | -1.18311732 | 0.002538095 | ** |
| siR_147456 | 2.1979   | 0.4848  | -2.18066414 | 1.77E-08    | ** |
| siR_147457 | 1.3471   | 0.9323  | -0.53099078 | 0.153965443 |    |
| siR_147466 | 1.2407   | 0.5594  | -1.14920216 | 0.007946935 | ** |
| siR_147498 | 285.6912 | 79.697  | -1.84185927 | 0           | ** |
| siR_147502 | 5.6011   | 2.9089  | -0.94523648 | 1.18E-06    |    |
| siR_147504 | 1.2053   | 0.2984  | -2.01407284 | 8.31E-05    | ** |
| siR_147506 | 5.991    | 1.6036  | -1.90148251 | 1.11E-17    | ** |
| siR_147511 | 5.8138   | 2.163   | -1.42644778 | 6.40E-12    | ** |
| siR_147522 | 0.01     | 14.3954 | 10.49139216 | 3.07E-121   | ** |
| siR_147526 | 0.01     | 1.7901  | 7.48389637  | 1.01E-15    | ** |
| siR_147527 | 0.01     | 1.4545  | 7.18437949  | 6.51E-13    | ** |
| siR_147528 | 0.01     | 1.0442  | 6.70625425  | 1.77E-09    | ** |
| siR_147532 | 0.01     | 4.6617  | 8.86471235  | 9.25E-40    | ** |
| siR_147533 | 0.01     | 4.2142  | 8.71911497  | 5.16E-36    | ** |
| siR_147534 | 0.01     | 1.2307  | 6.94333532  | 4.86E-11    | ** |
| siR_147560 | 1.3825   | 0.1865  | -2.89003194 | 1.90E-07    | ** |
| siR_147578 | 6.4873   | 1.0442  | -2.63522009 | 1.23E-27    | ** |
| siR_147580 | 13.1519  | 3.1327  | -2.06979271 | 3.51E-41    | ** |
| siR_147581 | 3.4741   | 1.0442  | -1.73424122 | 1.02E-09    | ** |
| siR_147582 | 4.8212   | 0.8578  | -2.49067906 | 1.03E-19    | ** |
| siR_147583 | 4.573    | 0.7832  | -2.54568825 | 3.32E-19    | ** |
| siR_147592 | 1.4534   | 0.5967  | -1.28435413 | 0.001680536 | ** |
| siR_147598 | 1.3825   | 0.2238  | -2.62699754 | 7.30E-07    | ** |
| siR_147606 | 0.01     | 34.0493 | 11.73340942 | 9.29E-286   | ** |
| siR_147607 | 0.01     | 3.0954  | 8.27398204  | 1.20E-26    | ** |
| siR_147615 | 0.01     | 4.0277  | 8.65381242  | 1.88E-34    | ** |
| siR_147622 | 0.01     | 2.6852  | 8.06888574  | 3.25E-23    | ** |
| siR_147640 | 0.01     | 1.7528  | 7.45351758  | 2.07E-15    | ** |
| siR_147643 | 1.0989   | 0.5594  | -0.97410795 | 0.02925074  |    |
| siR_147644 | 1.8434   | 1.0069  | -0.87244875 | 0.009591885 |    |
| siR_147661 | 0.01     | 1.5663  | 7.29121675  | 7.54E-14    | ** |
| siR_147681 | 8.6143   | 10.2558 | 0.25163456  | 0.047412766 |    |
| siR_14769  | 2.7651   | 4.065   | 0.5559237   | 0.008989147 |    |
| siR_147692 | 1.028    | 0.2984  | -1.78452082 | 0.000827671 | ** |
| siR_147701 | 2.4106   | 1.4172  | -0.76634891 | 0.007896093 |    |
| siR_147704 | 4.9275   | 1.7901  | -1.46081569 | 1.23E-10    | ** |
| siR_147711 | 1.5598   | 0.6713  | -1.21633151 | 0.00179751  | ** |
| siR_147744 | 1.4534   | 0.2984  | -2.28411237 | 2.74E-06    | ** |



|            |          |          |              |              |    |
|------------|----------|----------|--------------|--------------|----|
| siR_147753 | 1. 1698  | 0. 6713  | -0. 80123235 | 0. 056236154 |    |
| siR_147755 | 1. 737   | 0. 5221  | -1. 73419969 | 1. 76E-05    | ** |
| siR_147758 | 2. 0561  | 0. 634   | -1. 69735569 | 4. 03E-06    | ** |
| siR_147819 | 4. 9984  | 2. 0885  | -1. 25899922 | 7. 19E-09    | ** |
| siR_14782  | 1. 1344  | 0. 634   | -0. 83937469 | 0. 050540314 |    |
| siR_147824 | 0. 2481  | 1. 0442  | 2. 07340442  | 0. 000174526 | ** |
| siR_147858 | 1. 5952  | 0. 6713  | -1. 24870777 | 0. 00126596  | ** |
| siR_147866 | 1. 028   | 0. 5594  | -0. 87788811 | 0. 053501766 |    |
| siR_147875 | 10. 8477 | 14. 2463 | 0. 39319809  | 0. 000366433 |    |
| siR_147878 | 1. 0635  | 0. 9696  | -0. 13335843 | 0. 73604387  |    |
| siR_147902 | 3. 1905  | 1. 3799  | -1. 20921881 | 7. 82E-06    | ** |
| siR_147904 | 0. 01    | 18. 0129 | 10. 81481475 | 1. 61E-151   | ** |
| siR_147907 | 24. 2123 | 9. 4726  | -1. 35390776 | 1. 38E-41    | ** |
| siR_147908 | 1. 3116  | 0. 7832  | -0. 74387514 | 0. 057586901 |    |
| siR_147911 | 2. 0915  | 0. 634   | -1. 72198325 | 2. 63E-06    | ** |
| siR_147918 | 2. 9778  | 3. 0954  | 0. 05587899  | 0. 801062988 |    |
| siR_147920 | 82. 2084 | 42. 3285 | -0. 95765645 | 1. 85E-79    |    |
| siR_147921 | 0. 7799  | 1. 0815  | 0. 47167261  | 0. 248471739 |    |
| siR_147937 | 7. 7635  | 8. 9132  | 0. 19923627  | 0. 139700249 |    |
| siR_147938 | 1. 1344  | 1. 0442  | -0. 11953137 | 0. 754361807 |    |
| siR_147946 | 4. 1831  | 4. 2888  | 0. 03600155  | 0. 847614799 |    |
| siR_147985 | 0. 4608  | 1. 1934  | 1. 37286506  | 0. 002621948 | ** |
| siR_147999 | 4. 963   | 3. 1327  | -0. 66380584 | 0. 000743199 |    |
| siR_148019 | 3. 3677  | 1. 4918  | -1. 17470949 | 7. 13E-06    | ** |
| siR_148037 | 7. 799   | 4. 1769  | -0. 90085655 | 3. 54E-08    |    |
| siR_148038 | 1. 2053  | 0. 5221  | -1. 20699422 | 0. 006557539 | ** |
| siR_148040 | 1. 3471  | 0. 2238  | -2. 58957501 | 1. 24E-06    | ** |
| siR_148041 | 1. 1344  | 0. 1865  | -2. 6046819  | 8. 62E-06    | ** |
| siR_14805  | 2. 8005  | 1. 6782  | -0. 73876977 | 0. 005500505 |    |
| siR_148053 | 1. 1344  | 0. 2611  | -2. 11925507 | 8. 17E-05    | ** |
| siR_148080 | 1. 2762  | 0. 7832  | -0. 70440177 | 0. 074231739 |    |
| siR_14812  | 3. 0132  | 3. 7667  | 0. 3220047   | 0. 129209938 |    |
| siR_148134 | 2. 9423  | 1. 0815  | -1. 44391069 | 8. 78E-07    | ** |
| siR_148135 | 1. 7016  | 0. 4848  | -1. 81143033 | 1. 20E-05    | ** |
| siR_148149 | 1. 028   | 0. 1865  | -2. 46259273 | 4. 21E-05    | ** |
| siR_148159 | 1. 2053  | 0. 3729  | -1. 69253158 | 0. 000467353 | ** |
| siR_148166 | 0. 01    | 16. 7077 | 10. 70629743 | 1. 36E-140   | ** |
| siR_148174 | 0. 01    | 2. 9089  | 8. 18432989  | 4. 35E-25    | ** |
| siR_148215 | 0. 01    | 4. 1023  | 8. 68028919  | 4. 46E-35    | ** |
| siR_148217 | 3. 864   | 3. 0581  | -0. 33745951 | 0. 109626532 |    |
| siR_148240 | 2. 5169  | 1. 4172  | -0. 82860453 | 0. 003683551 |    |
| siR_148242 | 1. 7016  | 1. 0069  | -0. 75697153 | 0. 027686419 |    |
| siR_148243 | 1. 3471  | 0. 4848  | -1. 47439535 | 0. 000796247 | ** |
| siR_148249 | 5. 4593  | 2. 6479  | -1. 04386734 | 1. 91E-07    | ** |
| siR_148257 | 1. 9852  | 2. 3122  | 0. 21998183  | 0. 408318145 |    |
| siR_148259 | 22. 0144 | 8. 1301  | -1. 43710252 | 2. 17E-41    | ** |
| siR_148260 | 3. 0487  | 1. 7155  | -0. 82956507 | 0. 00136125  |    |

|            |         |         |             |             |    |
|------------|---------|---------|-------------|-------------|----|
| siR_148267 | 2.3397  | 0.7459  | -1.64926942 | 1.41E-06    | ** |
| siR_148275 | 3.2259  | 3.17    | -0.02521888 | 0.909944392 |    |
| siR_148291 | 0.01    | 2.6479  | 8.04870483  | 6.67E-23    | ** |
| siR_148292 | 0.01    | 2.2749  | 7.82965932  | 8.83E-20    | ** |
| siR_148300 | 0.01    | 15.0294 | 10.5535717  | 1.51E-126   | ** |
| siR_148310 | 0.01    | 1.7155  | 7.42248532  | 4.25E-15    | ** |
| siR_148312 | 0.01    | 4.3261  | 8.7569232   | 5.97E-37    | ** |
| siR_148313 | 0.01    | 3.3564  | 8.39077085  | 7.81E-29    | ** |
| siR_148335 | 2.7296  | 1.2307  | -1.14921042 | 7.27E-05    | ** |
| siR_148340 | 0.01    | 10.4423 | 10.0282238  | 3.79E-88    | ** |
| siR_148345 | 0.01    | 3.5802  | 8.48389637  | 1.05E-30    | ** |
| siR_148353 | 0.01    | 2.8716  | 8.16571099  | 8.93E-25    | ** |
| siR_148379 | 3.3677  | 0.8578  | -1.97305041 | 5.31E-11    | ** |
| siR_148391 | 0.01    | 1.4172  | 7.14689956  | 1.34E-12    | ** |
| siR_148407 | 0.01    | 13.836  | 10.4342112  | 1.48E-116   | ** |
| siR_148413 | 1.2053  | 1.0442  | -0.20699422 | 0.579823032 |    |
| siR_148422 | 0.01    | 4.1769  | 8.70628879  | 1.06E-35    | ** |
| siR_148424 | 0.01    | 2.0512  | 7.68032436  | 6.59E-18    | ** |
| siR_148437 | 1.0989  | 0.4102  | -1.42166071 | 0.003288611 | ** |
| siR_148439 | 0.01    | 1.0069  | 6.6537766   | 3.63E-09    | ** |
| siR_148447 | 1.028   | 0.3729  | -1.46297956 | 0.003720663 | ** |
| siR_148450 | 1.7725  | 0.634   | -1.48323088 | 0.000105591 | ** |
| siR_148457 | 0.01    | 2.2003  | 7.78155643  | 3.72E-19    | ** |
| siR_148460 | 0.01    | 1.7901  | 7.48389637  | 1.01E-15    | ** |
| siR_148488 | 53.2813 | 24.3156 | -1.13174709 | 5.93E-68    | ** |
| siR_148489 | 1.737   | 0.4848  | -1.84113615 | 7.68E-06    | ** |
| siR_148525 | 1.8079  | 1.7901  | -0.0142747  | 0.963590548 |    |
| siR_148531 | 1.6307  | 0.4848  | -1.75002979 | 2.87E-05    | ** |
| siR_14854  | 0.01    | 1.0442  | 6.70625425  | 1.77E-09    | ** |
| siR_148551 | 2.9423  | 4.1396  | 0.49254702  | 0.018191414 |    |
| siR_148557 | 1.5243  | 0.7459  | -1.03109274 | 0.006885853 | ** |
| siR_148558 | 1.4889  | 0.5221  | -1.5118488  | 0.000322184 | ** |
| siR_14857  | 0.01    | 1.3426  | 7.06888574  | 5.63E-12    | ** |
| siR_148574 | 1.2407  | 0.5221  | -1.24875625 | 0.004597643 | ** |
| siR_148601 | 1.3825  | 0.1119  | -3.62699754 | 7.64E-09    | ** |
| siR_14861  | 0.01    | 3.7294  | 8.54279973  | 5.90E-32    | ** |
| siR_148644 | 16.4488 | 5.4449  | -1.59500488 | 2.88E-36    | ** |
| siR_148661 | 0.01    | 1.0815  | 6.75688986  | 8.62E-10    | ** |
| siR_148666 | 1.0989  | 0.7459  | -0.55900597 | 0.178387672 |    |
| siR_148680 | 1.418   | 0.8205  | -0.78928229 | 0.037521829 |    |
| siR_148683 | 8.6143  | 3.3564  | -1.35981891 | 6.82E-16    | ** |
| siR_148695 | 1.3825  | 2.0139  | 0.54271257  | 0.072644775 |    |
| siR_148747 | 2.3397  | 1.6036  | -0.54500923 | 0.053116145 |    |
| siR_148755 | 6.4873  | 3.0581  | -1.08498257 | 4.60E-09    | ** |
| siR_148759 | 1.5598  | 0.8205  | -0.92678582 | 0.012310409 |    |
| siR_148765 | 0.01    | 3.0581  | 8.25649177  | 2.46E-26    | ** |
| siR_148769 | 0.01    | 7.7944  | 9.60629416  | 5.54E-66    | ** |

|            |         |         |             |               |    |
|------------|---------|---------|-------------|---------------|----|
| siR_148782 | 4.4312  | 2.2376  | -0.98574528 | 7.74E-06      |    |
| siR_148837 | 4.573   | 2.0885  | -1.13067378 | 3.74E-07      | ** |
| siR_148853 | 0.01    | 1.1934  | 6.89893387  | 9.98E-11      | ** |
| siR_148905 | 5.9556  | 1.7528  | -1.76458547 | 4.98E-16      | ** |
| siR_148938 | 0.01    | 2.0885  | 7.70632333  | 3.21E-18      | ** |
| siR_148952 | 1.5598  | 0.5967  | -1.38628337 | 0.000554254   | ** |
| siR_148998 | 2.9778  | 1.1188  | -1.4122947  | 1.14E-06      | ** |
| siR_149011 | 0.01    | 1.8647  | 7.54279973  | 2.40E-16      | ** |
| siR_149028 | 1.7016  | 0.8578  | -0.98817872 | 0.005777092   |    |
| siR_149078 | 1.028   | 0.9323  | -0.14097409 | 0.726340828   |    |
| siR_149093 | 0.01    | 1.0069  | 6.6537766   | 3.63E-09      | ** |
| siR_149094 | 0.01    | 4.4007  | 8.78158921  | 1.42E-37      | ** |
| siR_149096 | 0.01    | 1.1188  | 6.80580835  | 4.20E-10      | ** |
| siR_149162 | 0.01    | 2.0139  | 7.65384824  | 1.35E-17      | ** |
| siR_149172 | 0.8508  | 1.3426  | 0.65813761  | 0.082288618   |    |
| siR_149173 | 2.4106  | 1.4172  | -0.76634891 | 0.007896093   |    |
| siR_149196 | 4.9984  | 1.7155  | -1.54283723 | 1.49E-11      | ** |
| siR_149204 | 0.01    | 1.902   | 7.57137344  | 1.17E-16      | ** |
| siR_149217 | 0.01    | 1.0815  | 6.75688986  | 8.62E-10      | ** |
| siR_149259 | 2.1624  | 1.0815  | -0.99959975 | 0.001645383   |    |
| siR_149263 | 0.01    | 2.8343  | 8.14684866  | 1.83E-24      | ** |
| siR_149264 | 2.0206  | 2.4241  | 0.26266546  | 0.315969192   |    |
| siR_149273 | 0.01    | 6.9367  | 9.43810568  | 8.38E-59      | ** |
| siR_149276 | 0.01    | 37.7041 | 11.8805057  | 831474041048e | ** |
| siR_149282 | 0.01    | 2.7225  | 8.08878824  | 1.58E-23      | ** |
| siR_149289 | 0.01    | 1.5663  | 7.29121675  | 7.54E-14      | ** |
| siR_149294 | 0.01    | 2.3495  | 7.87620996  | 2.10E-20      | ** |
| siR_149359 | 4.3249  | 2.3868  | -0.85758909 | 8.47E-05      |    |
| siR_149366 | 0.01    | 1.0815  | 6.75688986  | 8.62E-10      | ** |
| siR_149408 | 1.9497  | 0.4475  | -2.12329257 | 1.88E-07      | ** |
| siR_149421 | 0.01    | 3.5429  | 8.46878694  | 2.15E-30      | ** |
| siR_149442 | 6.8773  | 0.7459  | -3.20478815 | 2.47E-35      | ** |
| siR_149483 | 0.01    | 9.5472  | 9.89893387  | 1.18E-80      | ** |
| siR_149487 | 0.01    | 40.4266 | 11.98108916 | 0             | ** |
| siR_149488 | 0.01    | 1.8274  | 7.51364865  | 4.92E-16      | ** |
| siR_149506 | 11.9466 | 5.967   | -1.0015224  | 8.76E-14      | ** |
| siR_149514 | 1.0635  | 0.8205  | -0.37424479 | 0.360625484   |    |
| siR_149520 | 5.4947  | 2.2376  | -1.29608856 | 5.39E-10      | ** |
| siR_149526 | 3.0487  | 2.797   | -0.12431394 | 0.58842659    |    |
| siR_149531 | 0.01    | 3.8786  | 8.59939219  | 3.33E-33      | ** |
| siR_149543 | 0.01    | 1.9393  | 7.59939219  | 5.69E-17      | ** |
| siR_149548 | 0.01    | 2.3868  | 7.89893387  | 1.02E-20      | ** |
| siR_149554 | 0.319   | 1.1188  | 1.81032383  | 0.000377597   | ** |
| siR_149557 | 3.0841  | 2.6106  | -0.24046812 | 0.301023794   |    |
| siR_149562 | 1.418   | 0.1865  | -2.92661    | 1.09E-07      | ** |
| siR_149568 | 1.028   | 0.4102  | -1.32544087 | 0.007079856   | ** |
| siR_149588 | 0.01    | 1.0442  | 6.70625425  | 1.77E-09      | ** |

|            |          |          |              |              |    |
|------------|----------|----------|--------------|--------------|----|
| siR_149592 | 1. 0989  | 0. 9696  | -0. 1805985  | 0. 64392648  |    |
| siR_149593 | 1. 1698  | 0. 4475  | -1. 38630231 | 0. 002893159 | ** |
| siR_149602 | 0. 01    | 1. 7528  | 7. 45351758  | 2. 07E-15    | ** |
| siR_149604 | 4. 3249  | 4. 2888  | -0. 01209274 | 0. 95044831  |    |
| siR_149606 | 22. 7589 | 20. 8473 | -0. 12657028 | 0. 12948465  |    |
| siR_149630 | 0. 01    | 1. 3426  | 7. 06888574  | 5. 63E-12    | ** |
| siR_149637 | 0. 01    | 1. 529   | 7. 2564446   | 1. 55E-13    | ** |
| siR_149648 | 5. 5302  | 2. 4614  | -1. 16785253 | 9. 57E-09    | ** |
| siR_149662 | 1. 1344  | 0. 7459  | -0. 60487531 | 0. 14203681  |    |
| siR_149740 | 3. 3323  | 1. 8647  | -0. 83757475 | 0. 000731131 |    |
| siR_149754 | 1. 2053  | 0. 7459  | -0. 69233815 | 0. 087734995 |    |
| siR_149798 | 2. 3042  | 1. 7155  | -0. 42563682 | 0. 125976802 |    |
| siR_149802 | 1. 4534  | 0. 7086  | -1. 03638844 | 0. 008088782 | ** |
| siR_149803 | 30. 2388 | 20. 2506 | -0. 57843623 | 1. 53E-13    |    |
| siR_149817 | 0. 01    | 3. 0581  | 8. 25649177  | 2. 46E-26    | ** |
| siR_149834 | 9. 2524  | 12. 941  | 0. 48404956  | 3. 87E-05    |    |
| siR_149839 | 0. 01    | 2. 3868  | 7. 89893387  | 1. 02E-20    | ** |
| siR_149851 | 6. 5228  | 9. 2116  | 0. 49796037  | 0. 000367515 |    |
| siR_149853 | 2. 5878  | 1. 7155  | -0. 593097   | 0. 028048357 |    |
| siR_149854 | 3. 3323  | 1. 1934  | -1. 48144061 | 9. 41E-08    | ** |
| siR_149857 | 1. 0635  | 0. 4475  | -1. 24886045 | 0. 008857046 | ** |
| siR_149864 | 1. 1698  | 0. 7832  | -0. 57880922 | 0. 151563912 |    |
| siR_149884 | 0. 01    | 8. 1301  | 9. 66712929  | 8. 58E-69    | ** |
| siR_149916 | 29. 0335 | 21. 705  | -0. 41969108 | 6. 75E-08    |    |
| siR_149920 | 0. 01    | 5. 5195  | 9. 10839377  | 6. 11E-47    | ** |
| siR_149921 | 0. 01    | 4. 2888  | 8. 74443023  | 1. 22E-36    | ** |
| siR_149938 | 7. 8699  | 6. 8248  | -0. 20555854 | 0. 153873177 |    |
| siR_149942 | 12. 6911 | 8. 9132  | -0. 50980174 | 2. 01E-05    |    |
| siR_149945 | 4. 1476  | 3. 0581  | -0. 43964118 | 0. 033813657 |    |
| siR_149950 | 7. 1609  | 4. 5126  | -0. 66618202 | 4. 73E-05    |    |
| siR_149957 | 0. 01    | 9. 3608  | 9. 87048802  | 4. 28E-79    | ** |
| siR_149959 | 3. 0841  | 1. 6782  | -0. 87793488 | 0. 000723099 |    |
| siR_149974 | 1. 6661  | 0. 5967  | -1. 48139731 | 0. 000174482 | ** |
| siR_149982 | 1. 3471  | 0. 7086  | -0. 92681358 | 0. 020219118 |    |
| siR_149996 | 0. 01    | 6. 1162  | 9. 25649177  | 6. 18E-52    | ** |
| siR_149999 | 3. 6513  | 1. 7528  | -1. 05874882 | 1. 70E-05    | ** |
| siR_150000 | 2. 0915  | 0. 9323  | -1. 16567183 | 0. 000456163 | ** |
| siR_150009 | 8. 0826  | 5. 967   | -0. 43781367 | 0. 003106554 |    |
| siR_150018 | 0. 01    | 2. 536   | 7. 98641094  | 5. 76E-22    | ** |
| siR_150021 | 3. 0841  | 3. 8413  | 0. 3167451   | 0. 131406864 |    |
| siR_150022 | 0. 01    | 10. 7779 | 10. 07386039 | 5. 87E-91    | ** |
| siR_150024 | 0. 01    | 6. 3773  | 9. 31680194  | 4. 04E-54    | ** |
| siR_150025 | 0. 01    | 3. 17    | 8. 30833903  | 2. 84E-27    | ** |
| siR_150031 | 0. 01    | 1. 6036  | 7. 32517051  | 3. 67E-14    | ** |
| siR_150056 | 1. 6661  | 1. 0069  | -0. 72655458 | 0. 035558339 |    |
| siR_150072 | 0. 01    | 11. 7476 | 10. 19815033 | 4. 49E-99    | ** |
| siR_150083 | 0. 01    | 2. 8343  | 8. 14684866  | 1. 83E-24    | ** |

|            |         |         |             |             |    |
|------------|---------|---------|-------------|-------------|----|
| siR_150084 | 0.01    | 1.1188  | 6.80580835  | 4.20E-10    | ** |
| siR_150092 | 1.4889  | 0.7459  | -0.99719273 | 0.009388402 |    |
| siR_150094 | 24.6732 | 14.3208 | -0.78483275 | 2.56E-18    |    |
| siR_150213 | 1.418   | 1.3799  | -0.03929381 | 0.908620659 |    |
| siR_150215 | 1.7016  | 2.0139  | 0.24310011  | 0.396015103 |    |
| siR_150242 | 0.01    | 7.7198  | 9.59241966  | 2.33E-65    | ** |
| siR_150243 | 0.01    | 1.1561  | 6.85312238  | 2.05E-10    | ** |
| siR_150255 | 0.01    | 69.8514 | 12.77007332 | 0           | ** |
| siR_150256 | 0.01    | 1.8274  | 7.51364865  | 4.92E-16    | ** |
| siR_150257 | 0.01    | 1.1188  | 6.80580835  | 4.20E-10    | ** |
| siR_150260 | 0.01    | 8.9878  | 9.81182421  | 5.67E-76    | ** |
| siR_150266 | 0.01    | 1.3426  | 7.06888574  | 5.63E-12    | ** |
| siR_150274 | 0.01    | 3.6921  | 8.52829782  | 1.21E-31    | ** |
| siR_150280 | 0.0354  | 3.7294  | 6.71905037  | 3.11E-30    | ** |
| siR_150297 | 1.0989  | 0.7832  | -0.48860744 | 0.233779461 |    |
| siR_150304 | 0.01    | 1.4918  | 7.22091032  | 3.17E-13    | ** |
| siR_150305 | 1.2762  | 1.4172  | 0.15118893  | 0.652003744 |    |
| siR_150348 | 0.01    | 6.7502  | 9.39878644  | 3.05E-57    | ** |
| siR_150354 | 0.01    | 4.3261  | 8.7569232   | 5.97E-37    | ** |
| siR_15037  | 2.1624  | 1.0815  | -0.99959975 | 0.001645383 |    |
| siR_150392 | 0.01    | 2.2003  | 7.78155643  | 3.72E-19    | ** |
| siR_150407 | 1.3825  | 0.7459  | -0.89022535 | 0.022894115 |    |
| siR_150426 | 1.0989  | 0.1119  | -3.29577817 | 8.66E-07    | ** |
| siR_150434 | 1.5243  | 0.1865  | -3.03089933 | 2.02E-08    | ** |
| siR_150442 | 9.3233  | 5.1093  | -0.86771504 | 5.18E-09    |    |
| siR_150472 | 0.01    | 16.7822 | 10.71271614 | 3.22E-141   | ** |
| siR_150473 | 0.01    | 7.4961  | 9.54999639  | 1.74E-63    | ** |
| siR_150474 | 0.01    | 2.0885  | 7.70632333  | 3.21E-18    | ** |
| siR_150485 | 0.01    | 1.0069  | 6.6537766   | 3.63E-09    | ** |
| siR_150497 | 0.9571  | 1.2307  | 0.36273755  | 0.333810273 |    |
| siR_150513 | 0.01    | 4.9601  | 8.9542254   | 2.94E-42    | ** |
| siR_150521 | 0.01    | 1.0442  | 6.70625425  | 1.77E-09    | ** |
| siR_150529 | 1.1698  | 0.7086  | -0.72321852 | 0.080618428 |    |
| siR_150541 | 0.01    | 4.1769  | 8.70628879  | 1.06E-35    | ** |
| siR_150544 | 43.9225 | 20.9964 | -1.06481818 | 3.28E-51    | ** |
| siR_150577 | 0.01    | 1.4918  | 7.22091032  | 3.17E-13    | ** |
| siR_150581 | 0.01    | 7.0112  | 9.45351758  | 1.99E-59    | ** |
| siR_150589 | 0.01    | 1.2307  | 6.94333532  | 4.86E-11    | ** |
| siR_150619 | 0.01    | 1.4172  | 7.14689956  | 1.34E-12    | ** |
| siR_150623 | 0.01    | 13.8733 | 10.43809528 | 7.21E-117   | ** |
| siR_150630 | 0.01    | 22.8984 | 11.16103108 | 2.04E-192   | ** |
| siR_150678 | 15.2789 | 10.2931 | -0.56986313 | 2.26E-07    |    |
| siR_150682 | 166.083 | 78.5409 | -1.08038837 | 6.43E-193   | ** |
| siR_150683 | 2.127   | 1.0069  | -1.07889962 | 0.000892634 | ** |
| siR_150686 | 20.2419 | 10.8898 | -0.89436726 | 9.71E-19    |    |
| siR_150710 | 1.0989  | 0.5221  | -1.07366204 | 0.018227899 | *  |
| siR_150725 | 1.4889  | 0.7086  | -1.07120349 | 0.005883379 | ** |

|            |           |           |             |             |    |
|------------|-----------|-----------|-------------|-------------|----|
| siR_150730 | 0.01      | 1.3426    | 7.06888574  | 5.63E-12    | ** |
| siR_150735 | 0.01      | 3.7667    | 8.55715732  | 2.87E-32    | ** |
| siR_150748 | 0.01      | 2.7597    | 8.10836763  | 7.72E-24    | ** |
| siR_150750 | 0.01      | 1.9766    | 7.62687714  | 2.78E-17    | ** |
| siR_150751 | 9.5006    | 10.7406   | 0.17698406  | 0.148185139 |    |
| siR_150753 | 4426.7422 | 5766.303  | 0.38140129  | 0           |    |
| siR_150754 | 64.5898   | 93.906    | 0.53991099  | 1.60E-34    |    |
| siR_150755 | 1.1698    | 3.4683    | 1.5679668   | 1.13E-08    | ** |
| siR_150756 | 1.6307    | 2.1258    | 0.38251448  | 0.180977786 |    |
| siR_150757 | 0.9571    | 1.3426    | 0.48828797  | 0.183947304 |    |
| siR_150758 | 0.6026    | 1.1188    | 0.89267958  | 0.039367304 |    |
| siR_150762 | 0.01      | 1.5663    | 7.29121675  | 7.54E-14    | ** |
| siR_150765 | 2712.3115 | 2753.9655 | 0.02198761  | 0.003133703 |    |
| siR_150766 | 42.2563   | 45.7596   | 0.11490799  | 0.050140049 |    |
| siR_150767 | 0.7444    | 1.4918    | 1.00290417  | 0.008585838 | ** |
| siR_150768 | 0.8508    | 1.0069    | 0.24302847  | 0.549089802 |    |
| siR_150769 | 1.5243    | 0.9696    | -0.65268527 | 0.067567399 |    |
| siR_150773 | 158.3549  | 128.8503  | -0.29746561 | 6.74E-20    |    |
| siR_150774 | 1.4889    | 1.902     | 0.35327039  | 0.240207752 |    |
| siR_150775 | 0.9926    | 1.6782    | 0.7576303   | 0.027754859 |    |
| siR_150785 | 1.5952    | 1.268     | -0.33118257 | 0.31565066  |    |
| siR_150791 | 3.8286    | 3.8413    | 0.0047777   | 0.979057353 |    |
| siR_150795 | 1.1698    | 0.4475    | -1.38630231 | 0.002893159 | ** |
| siR_150799 | 1.2053    | 0.9323    | -0.37052611 | 0.334212439 |    |
| siR_15082  | 0.01      | 75.5947   | 12.88406937 | 0           | ** |
| siR_15083  | 0.01      | 3.7294    | 8.54279973  | 5.90E-32    | ** |
| siR_15084  | 0.01      | 2.163     | 7.75688986  | 7.63E-19    | ** |
| siR_150844 | 48.4601   | 46.3936   | -0.06287158 | 0.266307661 |    |
| siR_15085  | 0.01      | 1.1561    | 6.85312238  | 2.05E-10    | ** |
| siR_15086  | 0.01      | 1.0442    | 6.70625425  | 1.77E-09    | ** |
| siR_150862 | 0.01      | 41.3962   | 12.01528263 | 0           | ** |
| siR_150863 | 0.01      | 7.5707    | 9.56428289  | 4.13E-64    | ** |
| siR_150864 | 0.01      | 1.2307    | 6.94333532  | 4.86E-11    | ** |
| siR_15087  | 0.01      | 1.0069    | 6.6537766   | 3.63E-09    | ** |
| siR_150871 | 0.01      | 32.7067   | 11.67537049 | 1.61E-274   | ** |
| siR_150878 | 0.01      | 39.8298   | 11.95963252 | 0           | ** |
| siR_150879 | 0.01      | 1.1188    | 6.80580835  | 4.20E-10    | ** |
| siR_150882 | 0.01      | 5.4449    | 9.08876174  | 2.57E-46    | ** |
| siR_150883 | 0.01      | 1.0069    | 6.6537766   | 3.63E-09    | ** |
| siR_150890 | 0.01      | 6.8994    | 9.43032709  | 1.72E-58    | ** |
| siR_150891 | 0.01      | 2.9835    | 8.22086197  | 1.03E-25    | ** |
| siR_150892 | 0.01      | 1.0069    | 6.6537766   | 3.63E-09    | ** |
| siR_150917 | 5.1048    | 1.1934    | -2.09677676 | 3.71E-17    | ** |
| siR_150922 | 0.01      | 1.3426    | 7.06888574  | 5.63E-12    | ** |
| siR_150923 | 10.635    | 2.9835    | -1.83374235 | 7.35E-29    | ** |
| siR_150934 | 2.446     | 1.0069    | -1.28050399 | 4.39E-05    | ** |
| siR_150938 | 2.3397    | 0.8951    | -1.38620278 | 2.18E-05    | ** |

|            |          |         |             |               |    |
|------------|----------|---------|-------------|---------------|----|
| siR_150940 | 6.9127   | 3.4683  | -0.99502062 | 1.73E-08      |    |
| siR_150945 | 2.446    | 0.7086  | -1.78738103 | 1.79E-07      | ** |
| siR_150948 | 20.4192  | 9.8083  | -1.05785133 | 1.89E-24      | ** |
| siR_15095  | 0.01     | 9.137   | 9.83557675  | 3.20E-77      | ** |
| siR_150958 | 1.028    | 0.7459  | -0.46278613 | 0.27375448    |    |
| siR_15096  | 0.01     | 6.34    | 9.30833903  | 8.28E-54      | ** |
| siR_150967 | 0.01     | 3.6175  | 8.49884921  | 5.10E-31      | ** |
| siR_15097  | 0.01     | 2.5733  | 8.00747585  | 2.81E-22      | ** |
| siR_150973 | 0.01     | 4.9228  | 8.94333532  | 6.04E-42      | ** |
| siR_15098  | 0.01     | 1.4545  | 7.18437949  | 6.51E-13      | ** |
| siR_150987 | 0.01     | 7.7944  | 9.60629416  | 5.54E-66      | ** |
| siR_151023 | 4.6794   | 1.8274  | -1.3565311  | 3.05E-09      | ** |
| siR_151037 | 2.6587   | 1.4172  | -0.90767763 | 0.001256579   |    |
| siR_151038 | 7.9408   | 2.3495  | -1.75693059 | 9.06E-21      | ** |
| siR_151039 | 4.9984   | 1.6036  | -1.64015204 | 1.74E-12      | ** |
| siR_151043 | 3.2614   | 1.1188  | -1.54353923 | 5.27E-08      | ** |
| siR_151063 | 0.01     | 1.3053  | 7.02823761  | 1.15E-11      | ** |
| siR_151088 | 36.0172  | 16.5212 | -1.12436755 | 4.87E-46      | ** |
| siR_151089 | 1.3825   | 0.634   | -1.12472473 | 0.005814363   | ** |
| siR_151096 | 166.4375 | 58.9616 | -1.49713294 | 535384406154e | ** |
| siR_151097 | 2.3042   | 0.7086  | -1.70122257 | 9.93E-07      | ** |
| siR_151104 | 103.0176 | 32.744  | -1.65358836 | 2.65E-229     | ** |
| siR_151105 | 6.2392   | 1.7901  | -1.80132087 | 3.66E-17      | ** |
| siR_151106 | 1.2407   | 1.0069  | -0.30123391 | 0.420129598   |    |
| siR_151112 | 4.4312   | 1.3053  | -1.76331602 | 2.83E-12      | ** |
| siR_151113 | 2.3397   | 0.7086  | -1.72328019 | 6.50E-07      | ** |
| siR_151114 | 1.2053   | 0.5221  | -1.20699422 | 0.006557539   | ** |
| siR_151123 | 1.3116   | 0.2611  | -2.32865344 | 6.82E-06      | ** |
| siR_151151 | 1.5598   | 0.7459  | -1.06430692 | 0.005019683   | ** |
| siR_151163 | 9.5715   | 11.3373 | 0.24426016  | 0.042745276   |    |
| siR_151164 | 28.5018  | 22.4882 | -0.34188484 | 1.01E-05      |    |
| siR_151168 | 10.245   | 6.3027  | -0.70087809 | 3.53E-07      |    |
| siR_151172 | 2.6587   | 1.902   | -0.48320375 | 0.064406625   |    |
| siR_151187 | 19.3557  | 17.4535 | -0.14924211 | 0.100605555   |    |
| siR_151234 | 1.737    | 0.7086  | -1.29355438 | 0.00053939    | ** |
| siR_151235 | 13.081   | 11.5238 | -0.18285631 | 0.100278951   |    |
| siR_151236 | 2.9069   | 1.7901  | -0.69944126 | 0.00700015    |    |
| siR_151245 | 89.1921  | 81.3752 | -0.13232675 | 0.001704464   |    |
| siR_151246 | 1.418    | 3.0581  | 1.10877805  | 4.10E-05      | ** |
| siR_151247 | 3.1196   | 2.797   | -0.1574808  | 0.490065387   |    |
| siR_15125  | 1.5952   | 0.5221  | -1.61133925 | 9.52E-05      | ** |
| siR_151258 | 2.8005   | 2.0139  | -0.47569238 | 0.06126205    |    |
| siR_151276 | 3.3677   | 1.0069  | -1.74184322 | 1.64E-09      | ** |
| siR_151278 | 7.409    | 2.7597  | -1.42476739 | 8.88E-15      | ** |
| siR_151279 | 7.2318   | 1.529   | -2.24176637 | 1.23E-25      | ** |
| siR_15128  | 7.1254   | 3.3937  | -1.07011197 | 1.24E-09      | ** |
| siR_151289 | 12.9392  | 14.3208 | 0.14636367  | 0.165055181   |    |

|            |         |         |             |             |    |
|------------|---------|---------|-------------|-------------|----|
| siR_151290 | 0.6735  | 1.3053  | 0.95463157  | 0.018405953 |    |
| siR_151292 | 13.2937 | 10.1812 | -0.38483509 | 0.000759646 |    |
| siR_151304 | 2.3042  | 1.1561  | -0.99499975 | 0.001201305 |    |
| siR_151324 | 0.01    | 4.4753  | 8.80584059  | 3.37E-38    | ** |
| siR_151333 | 0.01    | 7.1977  | 9.49139216  | 5.47E-61    | ** |
| siR_151349 | 1.0989  | 0.4475  | -1.29610052 | 0.006143403 | ** |
| siR_151408 | 0.01    | 6.1162  | 9.25649177  | 6.18E-52    | ** |
| siR_151437 | 14.3572 | 8.1301  | -0.82042941 | 4.69E-12    |    |
| siR_151450 | 2.3397  | 1.3799  | -0.76175984 | 0.009241593 |    |
| siR_151451 | 1.2762  | 0.2611  | -2.28918008 | 1.13E-05    | ** |
| siR_151454 | 6.2037  | 3.8786  | -0.67759292 | 0.000121545 |    |
| siR_151456 | 4.1476  | 1.0815  | -1.9392431  | 5.70E-13    | ** |
| siR_151484 | 0.01    | 2.2376  | 7.80580835  | 1.81E-19    | ** |
| siR_151489 | 24.6023 | 10.5542 | -1.22097597 | 3.16E-36    | ** |
| siR_151491 | 1.7725  | 0.3356  | -2.40097101 | 8.87E-08    | ** |
| siR_151496 | 0.01    | 1.1188  | 6.80580835  | 4.20E-10    | ** |
| siR_151500 | 0.01    | 2.2376  | 7.80580835  | 1.81E-19    | ** |
| siR_151506 | 1.0989  | 0.4102  | -1.42166071 | 0.003288611 | ** |
| siR_151508 | 2.2688  | 0.5967  | -1.92685176 | 1.25E-07    | ** |
| siR_151513 | 1.2407  | 0.4102  | -1.59675492 | 0.000655154 | ** |
| siR_15153  | 0.01    | 2.9835  | 8.22086197  | 1.03E-25    | ** |
| siR_151589 | 2.8714  | 1.7528  | -0.71209293 | 0.006475591 |    |
| siR_151606 | 2.8714  | 0.4848  | -2.56629271 | 1.17E-12    | ** |
| siR_151617 | 0.01    | 1.902   | 7.57137344  | 1.17E-16    | ** |
| siR_151625 | 4.6439  | 4.5499  | -0.02950207 | 0.872714349 |    |
| siR_151647 | 4.6794  | 2.7225  | -0.78139151 | 0.000159092 |    |
| siR_151664 | 1.4534  | 0.634   | -1.19687707 | 0.002948104 | ** |
| siR_151691 | 0.01    | 2.2376  | 7.80580835  | 1.81E-19    | ** |
| siR_151713 | 6.1328  | 4.9228  | -0.31706678 | 0.056956052 |    |
| siR_151724 | 4.6794  | 2.0885  | -1.16385641 | 1.43E-07    | ** |
| siR_15173  | 7.8699  | 6.6383  | -0.24553147 | 0.090713447 |    |
| siR_151730 | 1.9497  | 0.4475  | -2.12329257 | 1.88E-07    | ** |
| siR_151732 | 10.1387 | 5.6687  | -0.83878285 | 3.24E-09    |    |
| siR_151734 | 11.0249 | 3.0954  | -1.83256781 | 7.76E-30    | ** |
| siR_151736 | 3.9349  | 0.3356  | -3.55151235 | 1.21E-22    | ** |
| siR_151738 | 5.9556  | 1.7528  | -1.76458547 | 4.98E-16    | ** |
| siR_151740 | 1.7725  | 1.1188  | -0.66383347 | 0.045088977 |    |
| siR_151741 | 2.2333  | 1.268   | -0.81662232 | 0.00694745  |    |
| siR_151758 | 0.01    | 3.0954  | 8.27398204  | 1.20E-26    | ** |
| siR_151763 | 0.01    | 3.5802  | 8.48389637  | 1.05E-30    | ** |
| siR_151764 | 0.01    | 1.1188  | 6.80580835  | 4.20E-10    | ** |
| siR_15177  | 2.0561  | 0.9323  | -1.14104426 | 0.000635096 | ** |
| siR_151771 | 0.01    | 1.3053  | 7.02823761  | 1.15E-11    | ** |
| siR_151787 | 1.418   | 0.9323  | -0.60499136 | 0.099700314 |    |
| siR_151790 | 1.028   | 0.3356  | -1.61502564 | 0.001825058 | ** |
| siR_151791 | 15.1371 | 6.5637  | -1.20550763 | 1.75E-22    | ** |
| siR_151797 | 2.5169  | 1.3799  | -0.86708418 | 0.00254044  |    |



|            |          |          |             |             |    |
|------------|----------|----------|-------------|-------------|----|
| siR_151801 | 19.2139  | 6.8621   | -1.48542833 | 4.35E-38    | ** |
| siR_151823 | 7.409    | 6.7875   | -0.12639854 | 0.388709415 |    |
| siR_151849 | 1.4889   | 0.5594   | -1.4122947  | 0.000627722 | ** |
| siR_151860 | 3.5095   | 2.0512   | -0.77479734 | 0.00118332  |    |
| siR_151862 | 5.7074   | 7.3842   | 0.37160795  | 0.015000104 |    |
| siR_151872 | 1.0635   | 1.1934   | 0.16625765  | 0.650059651 |    |
| siR_151876 | 1.028    | 0.6713   | -0.61481072 | 0.156712209 |    |
| siR_151883 | 0.01     | 4.2142   | 8.71911497  | 5.16E-36    | ** |
| siR_151885 | 0.01     | 2.3495   | 7.87620996  | 2.10E-20    | ** |
| siR_151899 | 0.01     | 1.9393   | 7.59939219  | 5.69E-17    | ** |
| siR_151906 | 2.127    | 0.4848   | -2.13335843 | 4.66E-08    | ** |
| siR_151907 | 0.01     | 2.8716   | 8.16571099  | 8.93E-25    | ** |
| siR_15191  | 0.01     | 1.4918   | 7.22091032  | 3.17E-13    | ** |
| siR_151913 | 0.01     | 1.0442   | 6.70625425  | 1.77E-09    | ** |
| siR_151941 | 1.9497   | 0.8578   | -1.18453893 | 0.00061254  | ** |
| siR_151957 | 1.028    | 0.3356   | -1.61502564 | 0.001825058 | ** |
| siR_151959 | 12.372   | 6.5637   | -0.91449753 | 1.97E-12    |    |
| siR_151962 | 1.6661   | 2.4614   | 0.56300413  | 0.040063427 |    |
| siR_151977 | 1.2053   | 0.4848   | -1.31393068 | 0.003684871 | ** |
| siR_151982 | 1.7016   | 0.5221   | -1.70449387 | 2.70E-05    | ** |
| siR_151989 | 3.1196   | 1.7528   | -0.83169967 | 0.001164992 |    |
| siR_151990 | 2.7296   | 1.3799   | -0.98412583 | 0.000470325 |    |
| siR_151993 | 0.01     | 1.1561   | 6.85312238  | 2.05E-10    | ** |
| siR_151995 | 1.8079   | 0.8578   | -1.07560166 | 0.002277255 | ** |
| siR_151996 | 4.6085   | 2.2749   | -1.01849412 | 2.78E-06    | ** |
| siR_151997 | 1.0635   | 0.7459   | -0.5117659  | 0.222021171 |    |
| siR_152028 | 20.0647  | 5.1466   | -1.96296802 | 6.23E-58    | ** |
| siR_152045 | 142.0834 | 119.3031 | -0.25210648 | 1.48E-13    |    |
| siR_152050 | 127.478  | 95.5469  | -0.41596732 | 3.17E-29    |    |
| siR_152056 | 0.01     | 334.1903 | 15.02838224 | 0           | ** |
| siR_152077 | 1.4534   | 1.2307   | -0.23995268 | 0.481707108 |    |
| siR_152078 | 3.9349   | 2.0512   | -0.93985881 | 5.15E-05    |    |
| siR_152079 | 1.1698   | 1.9393   | 0.7292741   | 0.022009857 |    |
| siR_152083 | 19.2139  | 16.9314  | -0.18244911 | 0.04675223  |    |
| siR_152084 | 1.1344   | 0.9323   | -0.28306327 | 0.468279224 |    |
| siR_152095 | 0.01     | 7.0485   | 9.46117246  | 9.70E-60    | ** |
| siR_152096 | 0.01     | 3.9531   | 8.62684064  | 7.90E-34    | ** |
| siR_152101 | 0.01     | 1.1934   | 6.89893387  | 9.98E-11    | ** |
| siR_152104 | 0.01     | 1.2307   | 6.94333532  | 4.86E-11    | ** |
| siR_152113 | 6.5582   | 3.0954   | -1.08317405 | 3.98E-09    | ** |
| siR_152114 | 2.9423   | 1.268    | -1.21438961 | 1.67E-05    | ** |
| siR_152115 | 1.0989   | 0.2984   | -1.88074067 | 0.000335467 | ** |
| siR_152130 | 1.3825   | 0.2984   | -2.21196004 | 7.41E-06    | ** |
| siR_152131 | 9.6424   | 3.2073   | -1.58803297 | 8.81E-22    | ** |
| siR_152156 | 0.01     | 4.1023   | 8.68028919  | 4.46E-35    | ** |
| siR_152157 | 0.01     | 1.4545   | 7.18437949  | 6.51E-13    | ** |
| siR_152161 | 0.01     | 1.3426   | 7.06888574  | 5.63E-12    | ** |

|            |         |         |             |             |    |
|------------|---------|---------|-------------|-------------|----|
| siR_152168 | 0.01    | 1.3799  | 7.10841991  | 2.74E-12    | ** |
| siR_152171 | 0.01    | 1.3053  | 7.02823761  | 1.15E-11    | ** |
| siR_152197 | 1.1344  | 0.4102  | -1.46753004 | 0.002218064 | ** |
| siR_152198 | 19.1075 | 6.5264  | -1.54977971 | 3.22E-40    | ** |
| siR_152202 | 7.7635  | 2.8716  | -1.4348524  | 1.45E-15    | ** |
| siR_152213 | 3.3323  | 1.3426  | -1.31148874 | 1.13E-06    | ** |
| siR_152225 | 5.3884  | 4.8855  | -0.14135073 | 0.412805934 |    |
| siR_152227 | 14.8181 | 9.8083  | -0.59528546 | 1.15E-07    |    |
| siR_152229 | 5.8138  | 4.1023  | -0.50304844 | 0.004417888 |    |
| siR_152236 | 0.7444  | 1.268   | 0.76840478  | 0.053326518 |    |
| siR_152270 | 3.6868  | 1.9766  | -0.89934821 | 0.000159602 |    |
| siR_152284 | 0.01    | 1.2307  | 6.94333532  | 4.86E-11    | ** |
| siR_152287 | 0.01    | 6.7502  | 9.39878644  | 3.05E-57    | ** |
| siR_152288 | 0.01    | 1.6409  | 7.35834351  | 1.79E-14    | ** |
| siR_152296 | 0.01    | 1.1188  | 6.80580835  | 4.20E-10    | ** |
| siR_152301 | 1.418   | 0.4848  | -1.54839593 | 0.00035749  | ** |
| siR_152302 | 0.01    | 1.0815  | 6.75688986  | 8.62E-10    | ** |
| siR_152317 | 6.8418  | 2.7225  | -1.32944388 | 1.57E-12    | ** |
| siR_152320 | 0.01    | 10.8525 | 10.08381171 | 1.39E-91    | ** |
| siR_152330 | 6.9127  | 2.4614  | -1.48977019 | 9.74E-15    | ** |
| siR_152334 | 0.01    | 1.1188  | 6.80580835  | 4.20E-10    | ** |
| siR_152342 | 0.01    | 3.8786  | 8.59939219  | 3.33E-33    | ** |
| siR_152363 | 0.01    | 5.333   | 9.05880352  | 2.22E-45    | ** |
| siR_152368 | 0.01    | 1.7528  | 7.45351758  | 2.07E-15    | ** |
| siR_152378 | 0.01    | 1.268   | 6.98641094  | 2.37E-11    | ** |
| siR_152397 | 0.9926  | 1.4545  | 0.55123894  | 0.122431923 |    |
| siR_152400 | 1.9852  | 1.8647  | -0.09034082 | 0.751260342 |    |
| siR_152412 | 1.6307  | 1.529   | -0.09290299 | 0.768586776 |    |
| siR_152417 | 0.01    | 3.9159  | 8.61320011  | 1.62E-33    | ** |
| siR_152424 | 1.0635  | 0.7086  | -0.58577666 | 0.167596979 |    |
| siR_152426 | 0.01    | 1.3426  | 7.06888574  | 5.63E-12    | ** |
| siR_152439 | 0.01    | 15.738  | 10.6200365  | 1.77E-132   | ** |
| siR_152444 | 8.6143  | 4.8109  | -0.84042676 | 4.68E-08    |    |
| siR_152449 | 1.2762  | 1.6782  | 0.39506022  | 0.220970312 |    |
| siR_152455 | 0.01    | 11.9713 | 10.22536411 | 6.01E-101   | ** |
| siR_152492 | 1.2762  | 1.268   | -0.00929969 | 0.98185728  |    |
| siR_152495 | 4.5376  | 3.0208  | -0.58699877 | 0.003856255 |    |
| siR_152499 | 3.3677  | 1.4545  | -1.21124033 | 4.23E-06    | ** |
| siR_1525   | 3.4741  | 1.529   | -1.18405087 | 4.45E-06    | ** |
| siR_152509 | 0.01    | 1.3053  | 7.02823761  | 1.15E-11    | ** |
| siR_152512 | 16.7324 | 3.6175  | -2.20957947 | 2.82E-56    | ** |
| siR_152527 | 33.5357 | 8.1674  | -2.03774893 | 2.29E-100   | ** |
| siR_152528 | 1.6307  | 0.5221  | -1.64309333 | 6.28E-05    | ** |
| siR_152535 | 2.5878  | 0.5221  | -2.30932806 | 2.29E-10    | ** |
| siR_152542 | 2.5524  | 0.8951  | -1.51173367 | 2.20E-06    | ** |
| siR_152548 | 1.737   | 0.2238  | -2.95631581 | 3.07E-09    | ** |
| siR_152551 | 2.2688  | 0.6713  | -1.75689989 | 6.87E-07    | ** |

|            |          |           |              |              |    |
|------------|----------|-----------|--------------|--------------|----|
| siR_152557 | 1. 6307  | 1. 0815   | -0. 59245773 | 0. 082669964 |    |
| siR_152570 | 0. 01    | 1. 902    | 7. 57137344  | 1. 17E-16    | ** |
| siR_152575 | 0. 01    | 15. 4024  | 10. 58893945 | 1. 14E-129   | ** |
| siR_152580 | 0. 01    | 2. 6852   | 8. 06888574  | 3. 25E-23    | ** |
| siR_152594 | 0. 01    | 4. 3261   | 8. 7569232   | 5. 97E-37    | ** |
| siR_152613 | 1. 5952  | 0. 8578   | -0. 89502409 | 0. 013930477 |    |
| siR_152619 | 4. 9984  | 1. 1934   | -2. 06638868 | 1. 52E-16    | ** |
| siR_152620 | 1. 2762  | 0. 2238   | -2. 5115725  | 3. 57E-06    | ** |
| siR_152627 | 1. 4534  | 0. 7086   | -1. 03638844 | 0. 008088782 | ** |
| siR_152645 | 1. 737   | 0. 8578   | -1. 01788453 | 0. 004258923 | ** |
| siR_152646 | 2. 3397  | 0. 7459   | -1. 64926942 | 1. 41E-06    | ** |
| siR_152647 | 1. 3825  | 0. 4848   | -1. 51181788 | 0. 000534972 | ** |
| siR_15267  | 3. 0132  | 2. 3495   | -0. 35894267 | 0. 134844829 |    |
| siR_152671 | 0. 01    | 1. 7901   | 7. 48389637  | 1. 01E-15    | ** |
| siR_152672 | 44. 3479 | 10. 032   | -2. 14425654 | 6. 30E-141   | ** |
| siR_152674 | 4. 4667  | 1. 4918   | -1. 58215523 | 8. 32E-11    | ** |
| siR_152677 | 1. 4889  | 0. 3356   | -2. 14943224 | 4. 80E-06    | ** |
| siR_152695 | 1. 5243  | 0. 6713   | -1. 18311732 | 0. 002538095 | ** |
| siR_152697 | 2. 3042  | 2. 4987   | 0. 11691175  | 0. 64104093  |    |
| siR_152702 | 0. 01    | 2. 2003   | 7. 78155643  | 3. 72E-19    | ** |
| siR_152713 | 2. 2333  | 0. 8205   | -1. 44460182 | 1. 89E-05    | ** |
| siR_152720 | 0. 01    | 1. 4172   | 7. 14689956  | 1. 34E-12    | ** |
| siR_152722 | 0. 01    | 1. 9393   | 7. 59939219  | 5. 69E-17    | ** |
| siR_152727 | 2. 1624  | 0. 9696   | -1. 15717181 | 0. 000393412 | ** |
| siR_152732 | 4. 6439  | 1. 268    | -1. 87278216 | 9. 03E-14    | ** |
| siR_152741 | 1. 1344  | 0. 7086   | -0. 67888607 | 0. 103795176 |    |
| siR_152758 | 2. 2688  | 2. 0512   | -0. 14546127 | 0. 586945246 |    |
| siR_152760 | 4. 2185  | 2. 3122   | -0. 86746391 | 8. 87E-05    |    |
| siR_152771 | 1. 5243  | 1. 529    | 0. 00444154  | 0. 985896768 |    |
| siR_152787 | 3. 9704  | 1. 7901   | -1. 14924418 | 1. 63E-06    | ** |
| siR_152794 | 0. 9571  | 1. 1561   | 0. 27252462  | 0. 474167388 |    |
| siR_152801 | 0. 01    | 1. 4172   | 7. 14689956  | 1. 34E-12    | ** |
| siR_152817 | 6. 0974  | 2. 536    | -1. 26563945 | 1. 35E-10    | ** |
| siR_152824 | 1. 7725  | 0. 9323   | -0. 92691946 | 0. 00754499  |    |
| siR_15283  | 21. 2345 | 21. 6304  | 0. 02665021  | 0. 750541967 |    |
| siR_152831 | 0. 01    | 5. 1466   | 9. 00747585  | 8. 09E-44    | ** |
| siR_152838 | 4. 7503  | 3. 804    | -0. 32050138 | 0. 090823882 |    |
| siR_152839 | 1. 1344  | 0. 5594   | -1. 01997728 | 0. 02136103  | *  |
| siR_152870 | 5. 282   | 1. 7901   | -1. 56104412 | 2. 59E-12    | ** |
| siR_152872 | 28. 2536 | 7. 3469   | -1. 94322716 | 8. 17E-80    | ** |
| siR_15289  | 9. 1461  | 7. 4215   | -0. 30144589 | 0. 026536732 |    |
| siR_152897 | 0. 01    | 14. 209   | 10. 47258931 | 1. 12E-119   | ** |
| siR_152898 | 0. 01    | 2. 6479   | 8. 04870483  | 6. 67E-23    | ** |
| siR_152899 | 0. 01    | 1. 3053   | 7. 02823761  | 1. 15E-11    | ** |
| siR_152903 | 0. 1418  | 200. 7529 | 10. 46734758 | 0            | ** |
| siR_152904 | 0. 01    | 1. 4545   | 7. 18437949  | 6. 51E-13    | ** |
| siR_152909 | 0. 01    | 25. 2107  | 11. 29982046 | 9. 01E-212   | ** |

|            |         |         |             |             |    |
|------------|---------|---------|-------------|-------------|----|
| siR_15291  | 5.4593  | 5.4449  | -0.00381043 | 0.983362201 |    |
| siR_152914 | 0.01    | 1.3426  | 7.06888574  | 5.63E-12    | ** |
| siR_152919 | 0.01    | 2.9835  | 8.22086197  | 1.03E-25    | ** |
| siR_152935 | 1.7016  | 0.5221  | -1.70449387 | 2.70E-05    | ** |
| siR_152948 | 0.01    | 1.3799  | 7.10841991  | 2.74E-12    | ** |
| siR_152956 | 1.5598  | 0.3356  | -2.21654644 | 1.81E-06    | ** |
| siR_152965 | 1.5243  | 0.634   | -1.26559212 | 0.001459604 | ** |
| siR_15297  | 4.8921  | 1.8647  | -1.39151035 | 6.33E-10    | ** |
| siR_152981 | 1.2053  | 0.2611  | -2.20671792 | 3.06E-05    | ** |
| siR_152982 | 20.4901 | 6.0789  | -1.75304483 | 5.97E-51    | ** |
| siR_152984 | 14.1091 | 2.9462  | -2.25969869 | 5.28E-49    | ** |
| siR_152993 | 0.01    | 4.5499  | 8.82969103  | 8.00E-39    | ** |
| siR_15300  | 1.7016  | 0.634   | -1.42433719 | 0.000229134 | ** |
| siR_153031 | 1.0989  | 0.3356  | -1.71124549 | 0.000775199 | ** |
| siR_153066 | 7.7635  | 5.9297  | -0.38874809 | 0.009455557 |    |
| siR_153089 | 0.01    | 1.1561  | 6.85312238  | 2.05E-10    | ** |
| siR_153127 | 3.7222  | 1.4172  | -1.39311221 | 7.01E-08    | ** |
| siR_153146 | 2.9778  | 2.6479  | -0.16939822 | 0.46909136  |    |
| siR_153181 | 8.4016  | 13.6868 | 0.70404918  | 3.09E-09    |    |
| siR_153184 | 89.6529 | 45.2002 | -0.98802109 | 5.48E-91    |    |
| siR_15319  | 1.6661  | 0.8578  | -0.95776177 | 0.007792404 |    |
| siR_153190 | 3.7931  | 3.7294  | -0.02443386 | 0.905116698 |    |
| siR_153214 | 3.0841  | 1.6409  | -0.91036222 | 0.000490905 |    |
| siR_153218 | 6.8773  | 4.2142  | -0.7065835  | 2.68E-05    |    |
| siR_153222 | 2.5169  | 1.1188  | -1.16969574 | 0.000112756 | ** |
| siR_153226 | 0.6381  | 1.8274  | 1.51793802  | 5.55E-05    | ** |
| siR_153227 | 1.028   | 1.4545  | 0.50068303  | 0.156910133 |    |
| siR_153274 | 1.3116  | 0.7459  | -0.81427367 | 0.04007629  |    |
| siR_1533   | 0.01    | 2.0139  | 7.65384824  | 1.35E-17    | ** |
| siR_153331 | 2.0915  | 2.3495  | 0.16781577  | 0.520751553 |    |
| siR_153337 | 4.9984  | 1.5663  | -1.67410579 | 8.21E-13    | ** |
| siR_153375 | 3.7222  | 3.5802  | -0.05611539 | 0.785310127 |    |
| siR_153378 | 0.01    | 5.706   | 9.15633594  | 1.68E-48    | ** |
| siR_153379 | 1.5952  | 0.9323  | -0.77487114 | 0.029704074 |    |
| siR_153384 | 13.2937 | 11.2255 | -0.243963   | 0.028708316 |    |
| siR_153387 | 3.7222  | 4.2142  | 0.17910321  | 0.359648317 |    |
| siR_153402 | 3.7577  | 1.8647  | -1.01090635 | 2.64E-05    | ** |
| siR_153403 | 0.01    | 2.7225  | 8.08878824  | 1.58E-23    | ** |
| siR_153407 | 1.4889  | 1.1188  | -0.4122947  | 0.234339555 |    |
| siR_153414 | 0.01    | 2.2749  | 7.82965932  | 8.83E-20    | ** |
| siR_153417 | 0.01    | 6.974   | 9.44584255  | 4.08E-59    | ** |
| siR_153421 | 0.01    | 4.1396  | 8.69334756  | 2.17E-35    | ** |
| siR_153432 | 0.01    | 1.3426  | 7.06888574  | 5.63E-12    | ** |
| siR_153434 | 0.01    | 15.9245 | 10.63703236 | 4.87E-134   | ** |
| siR_153444 | 12.5138 | 7.235   | -0.79045503 | 4.08E-10    |    |
| siR_153445 | 7.799   | 3.3937  | -1.20043011 | 3.14E-12    | ** |
| siR_153448 | 1.028   | 0.2611  | -1.9771659  | 0.000342937 | ** |

|            |          |          |              |              |    |
|------------|----------|----------|--------------|--------------|----|
| siR_153455 | 2. 2333  | 1. 0069  | -1. 14925665 | 0. 000339181 | ** |
| siR_153473 | 16. 7678 | 6. 3027  | -1. 41165151 | 4. 08E-31    | ** |
| siR_15348  | 0. 01    | 2. 4614  | 7. 94333532  | 2. 43E-21    | ** |
| siR_153486 | 2. 3751  | 0. 8951  | -1. 40786748 | 1. 50E-05    | ** |
| siR_153516 | 1. 1698  | 0. 7459  | -0. 64920776 | 0. 112106036 |    |
| siR_153523 | 0. 01    | 1. 7528  | 7. 45351758  | 2. 07E-15    | ** |
| siR_153525 | 2. 0561  | 1. 0815  | -0. 92687677 | 0. 003959628 |    |
| siR_153534 | 1. 0635  | 1. 1188  | 0. 07313213  | 0. 842404071 |    |
| siR_153542 | 0. 01    | 1. 7528  | 7. 45351758  | 2. 07E-15    | ** |
| siR_153544 | 5. 5656  | 2. 3122  | -1. 26727103 | 8. 29E-10    | ** |
| siR_153566 | 46. 3331 | 47. 214  | 0. 0271715   | 0. 632532832 |    |
| siR_153579 | 10. 5995 | 5. 8178  | -0. 86545061 | 5. 12E-10    |    |
| siR_153611 | 1. 028   | 0. 1119  | -3. 19955832 | 2. 76E-06    | ** |
| siR_153612 | 4. 1476  | 1. 7901  | -1. 21223658 | 3. 17E-07    | ** |
| siR_153614 | 2. 9423  | 0. 634   | -2. 21438961 | 4. 21E-11    | ** |
| siR_153631 | 1. 3116  | 0. 4102  | -1. 67692841 | 0. 000282277 | ** |
| siR_153644 | 0. 01    | 2. 0885  | 7. 70632333  | 3. 21E-18    | ** |
| siR_153647 | 29. 9907 | 32. 1846 | 0. 10185534  | 0. 144395475 |    |
| siR_153663 | 1. 3116  | 0. 8951  | -0. 55120703 | 0. 145600742 |    |
| siR_15370  | 1. 3471  | 0. 634   | -1. 08730221 | 0. 008088456 | ** |
| siR_153700 | 1. 3825  | 0. 8951  | -0. 62715871 | 0. 093219647 |    |
| siR_153704 | 0. 8153  | 1. 0815  | 0. 40763075  | 0. 312975092 |    |
| siR_153736 | 2. 2333  | 0. 8951  | -1. 31905629 | 6. 54E-05    | ** |
| siR_153742 | 3. 6513  | 2. 2749  | -0. 68260708 | 0. 003057494 |    |
| siR_15375  | 1. 1344  | 0. 2984  | -1. 92661    | 0. 000211792 | ** |
| siR_153751 | 1. 3471  | 2. 3495  | 0. 80249682  | 0. 006116666 |    |
| siR_153754 | 1. 1344  | 2. 4987  | 1. 13924826  | 0. 000153075 | ** |
| siR_153764 | 0. 01    | 3. 0581  | 8. 25649177  | 2. 46E-26    | ** |
| siR_153769 | 1. 4889  | 0. 7459  | -0. 99719273 | 0. 009388402 |    |
| siR_15378  | 4. 6085  | 2. 4614  | -0. 90481812 | 2. 17E-05    |    |
| siR_153780 | 4. 7503  | 3. 6921  | -0. 363577   | 0. 056894591 |    |
| siR_153781 | 1. 9143  | 0. 9696  | -0. 98135534 | 0. 003570807 |    |
| siR_15379  | 2. 4815  | 0. 7086  | -1. 80816908 | 1. 16E-07    | ** |
| siR_15380  | 2. 0915  | 0. 6713  | -1. 63950845 | 5. 70E-06    | ** |
| siR_153819 | 1. 028   | 0. 3356  | -1. 61502564 | 0. 001825058 | ** |
| siR_153827 | 0. 8508  | 1. 0442  | 0. 29550613  | 0. 462829197 |    |
| siR_153830 | 0. 01    | 1. 1934  | 6. 89893387  | 9. 98E-11    | ** |
| siR_153833 | 1. 737   | 1. 0442  | -0. 73419969 | 0. 030251896 |    |
| siR_153848 | 0. 01    | 3. 17    | 8. 30833903  | 2. 84E-27    | ** |
| siR_15385  | 8. 4371  | 3. 9159  | -1. 10740328 | 1. 05E-11    | ** |
| siR_153863 | 2. 8714  | 1. 8274  | -0. 65196186 | 0. 011764557 |    |
| siR_153868 | 1. 1344  | 0. 5221  | -1. 11953137 | 0. 013060942 | *  |
| siR_153876 | 41. 6182 | 24. 614  | -0. 75773544 | 3. 78E-28    |    |
| siR_153877 | 6. 2392  | 1. 8647  | -1. 74241751 | 1. 85E-16    | ** |
| siR_153879 | 1. 2762  | 0. 3356  | -1. 92703982 | 8. 25E-05    | ** |
| siR_153880 | 69. 7655 | 34. 7579 | -1. 00517286 | 3. 24E-73    | ** |
| siR_153884 | 28. 7499 | 9. 771   | -1. 55697881 | 4. 75E-60    | ** |

|            |           |          |              |              |    |
|------------|-----------|----------|--------------|--------------|----|
| siR_153886 | 4. 5021   | 0. 7832  | -2. 52314543 | 9. 37E-19    | ** |
| siR_153915 | 0. 01     | 2. 3868  | 7. 89893387  | 1. 02E-20    | ** |
| siR_153917 | 26. 7293  | 9. 5845  | -1. 47964698 | 4. 92E-52    | ** |
| siR_153931 | 0. 01     | 1. 4545  | 7. 18437949  | 6. 51E-13    | ** |
| siR_153948 | 3. 4741   | 1. 4545  | -1. 25611599 | 1. 52E-06    | ** |
| siR_153952 | 1. 5598   | 0. 5594  | -1. 4794089  | 0. 000288819 | ** |
| siR_153971 | 0. 01     | 2. 4614  | 7. 94333532  | 2. 43E-21    | ** |
| siR_153975 | 7. 0191   | 4. 9601  | -0. 50091685 | 0. 001824649 |    |
| siR_153995 | 6. 381    | 3. 2073  | -0. 99242323 | 6. 55E-08    |    |
| siR_153999 | 6. 2037   | 4. 8482  | -0. 35567971 | 0. 032880296 |    |
| siR_154000 | 2. 1979   | 0. 5967  | -1. 88104807 | 3. 08E-07    | ** |
| siR_154002 | 1. 1698   | 0. 9323  | -0. 32739572 | 0. 39733091  |    |
| siR_154013 | 0. 01     | 1. 6782  | 7. 39077085  | 8. 72E-15    | ** |
| siR_154014 | 0. 01     | 1. 7528  | 7. 45351758  | 2. 07E-15    | ** |
| siR_154041 | 0. 01     | 4. 438   | 8. 79376586  | 6. 91E-38    | ** |
| siR_154045 | 24. 8859  | 16. 4466 | -0. 5975392  | 5. 32E-12    |    |
| siR_154050 | 2. 3751   | 1. 4545  | -0. 70746496 | 0. 01391938  |    |
| siR_154073 | 0. 01     | 15. 0667 | 10. 55714775 | 7. 38E-127   | ** |
| siR_15408  | 2. 9423   | 1. 1561  | -1. 34767816 | 3. 05E-06    | ** |
| siR_154082 | 1. 3116   | 0. 5594  | -1. 22937565 | 0. 003968625 | ** |
| siR_154086 | 0. 01     | 15. 2532 | 10. 57489623 | 2. 03E-128   | ** |
| siR_154099 | 4. 573    | 2. 536   | -0. 85058617 | 5. 95E-05    |    |
| siR_154102 | 0. 01     | 16. 5585 | 10. 69335627 | 2. 40E-139   | ** |
| siR_154103 | 5. 3884   | 0. 6713  | -3. 0048274  | 2. 13E-26    | ** |
| siR_154104 | 3. 3677   | 3. 2446  | -0. 053723   | 0. 804242494 |    |
| siR_154105 | 0. 01     | 15. 6634 | 10. 61318169 | 7. 47E-132   | ** |
| siR_154109 | 0. 01     | 2. 3495  | 7. 87620996  | 2. 10E-20    | ** |
| siR_154119 | 0. 01     | 1. 4172  | 7. 14689956  | 1. 34E-12    | ** |
| siR_154123 | 0. 01     | 14. 5073 | 10. 50256332 | 3. 55E-122   | ** |
| siR_154130 | 0. 01     | 1. 0069  | 6. 6537766   | 3. 63E-09    | ** |
| siR_154150 | 1. 5598   | 0. 8951  | -0. 80124028 | 0. 026942588 |    |
| siR_154156 | 1. 5598   | 1. 1188  | -0. 4794089  | 0. 1615353   |    |
| siR_15416  | 1. 7725   | 0. 8578  | -1. 04707241 | 0. 003122567 | ** |
| siR_154163 | 0. 01     | 6. 4145  | 9. 325193    | 1. 97E-54    | ** |
| siR_154167 | 2. 0561   | 0. 4848  | -2. 08444883 | 1. 21E-07    | ** |
| siR_154171 | 1. 8079   | 0. 6713  | -1. 42928533 | 0. 000138786 | ** |
| siR_154182 | 0. 01     | 4. 3634  | 8. 76930892  | 2. 91E-37    | ** |
| siR_154185 | 2. 2333   | 0. 5594  | -1. 9972249  | 7. 89E-08    | ** |
| siR_154203 | 1. 1344   | 0. 4102  | -1. 46753004 | 0. 002218064 | ** |
| siR_154210 | 2. 5524   | 1. 6782  | -0. 60493978 | 0. 026406817 |    |
| siR_154217 | 0. 01     | 1. 0815  | 6. 75688986  | 8. 62E-10    | ** |
| siR_154225 | 11. 0958  | 5. 1093  | -1. 11881614 | 3. 65E-15    | ** |
| siR_154252 | 0. 01     | 32. 2219 | 11. 65382585 | 1. 84E-270   | ** |
| siR_154254 | 100. 0398 | 87. 0066 | -0. 20137733 | 5. 84E-07    |    |
| siR_154263 | 23. 716   | 6. 8621  | -1. 78913865 | 2. 46E-60    | ** |
| siR_154272 | 3. 0132   | 0. 5594  | -2. 42934428 | 1. 67E-12    | ** |
| siR_154273 | 0. 01     | 1. 0442  | 6. 70625425  | 1. 77E-09    | ** |

|            |         |         |             |             |    |
|------------|---------|---------|-------------|-------------|----|
| siR_154287 | 2.4106  | 1.268   | -0.92683753 | 0.001786315 |    |
| siR_154296 | 0.01    | 1.3799  | 7.10841991  | 2.74E-12    | ** |
| siR_154301 | 1.1344  | 0.4475  | -1.34196985 | 0.004230483 | ** |
| siR_154303 | 8.9688  | 5.6687  | -0.66189705 | 5.91E-06    |    |
| siR_154305 | 34.0674 | 19.8403 | -0.77995801 | 1.90E-24    |    |
| siR_154321 | 1.2762  | 0.634   | -1.00929969 | 0.015340798 | *  |
| siR_154328 | 4.0058  | 3.3192  | -0.27125483 | 0.1853045   |    |
| siR_154331 | 1.3825  | 0.4848  | -1.51181788 | 0.000534972 | ** |
| siR_154338 | 75.1894 | 49.1533 | -0.61324101 | 1.24E-34    |    |
| siR_154368 | 1.7016  | 0.3356  | -2.34207732 | 2.45E-07    | ** |
| siR_15437  | 1.028   | 0.2611  | -1.9771659  | 0.000342937 | ** |
| siR_154372 | 20.9509 | 6.3027  | -1.73297032 | 2.95E-51    | ** |
| siR_154389 | 37.7897 | 14.5819 | -1.37381435 | 2.44E-65    | ** |
| siR_154429 | 12.0884 | 5.5941  | -1.11164536 | 3.11E-16    | ** |
| siR_154451 | 3.0487  | 2.1258  | -0.52018832 | 0.034010884 |    |
| siR_154461 | 1.1344  | 0.4848  | -1.22646783 | 0.007625228 | ** |
| siR_15448  | 1.1698  | 0.3356  | -1.80144727 | 0.000321486 | ** |
| siR_15449  | 1.2053  | 0.9696  | -0.31393068 | 0.408887515 |    |
| siR_154514 | 0.01    | 3.5802  | 8.48389637  | 1.05E-30    | ** |
| siR_154516 | 0.01    | 4.8482  | 8.9213054   | 2.54E-41    | ** |
| siR_154537 | 2.836   | 2.3868  | -0.24877985 | 0.305890496 |    |
| siR_154556 | 1.737   | 2.4614  | 0.50288137  | 0.063834001 |    |
| siR_154557 | 3.1196  | 2.4614  | -0.34188193 | 0.146059163 |    |
| siR_154587 | 7.4445  | 2.163   | -1.78314129 | 6.15E-20    | ** |
| siR_154592 | 2.1624  | 0.7086  | -1.60959005 | 5.25E-06    | ** |
| siR_15460  | 1.9497  | 1.6782  | -0.21633749 | 0.459383335 |    |
| siR_154616 | 1.2762  | 0.1492  | -3.096535   | 2.35E-07    | ** |
| siR_154642 | 1.6661  | 0.1492  | -3.48115555 | 3.94E-10    | ** |
| siR_154656 | 3.2968  | 0.9696  | -1.76560476 | 1.73E-09    | ** |
| siR_154677 | 2.0561  | 1.1561  | -0.83064424 | 0.00863454  |    |
| siR_154678 | 2.0915  | 0.4102  | -2.3501386  | 9.01E-09    | ** |
| siR_154702 | 0.01    | 1.9393  | 7.59939219  | 5.69E-17    | ** |
| siR_154704 | 1.6661  | 1.2307  | -0.43699587 | 0.183647223 |    |
| siR_154708 | 9.2524  | 7.6079  | -0.28232935 | 0.03603212  |    |
| siR_154753 | 2.3042  | 0.8205  | -1.48969071 | 8.75E-06    | ** |
| siR_154756 | 2.2333  | 4.4753  | 1.00280733  | 4.72E-06    | ** |
| siR_154804 | 2.5878  | 0.8951  | -1.53160535 | 1.49E-06    | ** |
| siR_154807 | 4.2185  | 1.9393  | -1.1211941  | 1.26E-06    | ** |
| siR_154808 | 1.2407  | 0.7832  | -0.66370165 | 0.09494326  |    |
| siR_154830 | 0.5672  | 12.0459 | 4.40854084  | 3.63E-79    | ** |
| siR_154834 | 0.3545  | 1.3799  | 1.96070619  | 2.94E-05    | ** |
| siR_154849 | 0.01    | 3.1327  | 8.29126281  | 5.83E-27    | ** |
| siR_154852 | 0.01    | 1.7155  | 7.42248532  | 4.25E-15    | ** |
| siR_154865 | 0.01    | 6.0789  | 9.24766648  | 1.27E-51    | ** |
| siR_154867 | 0.01    | 3.4683  | 8.43808488  | 9.04E-30    | ** |
| siR_154868 | 0.01    | 1.529   | 7.2564446   | 1.55E-13    | ** |
| siR_154875 | 0.01    | 1.1934  | 6.89893387  | 9.98E-11    | ** |

|            |          |         |             |             |    |
|------------|----------|---------|-------------|-------------|----|
| siR_154886 | 0.01     | 2.7225  | 8.08878824  | 1.58E-23    | ** |
| siR_154892 | 1.1698   | 1.0442  | -0.16386383 | 0.664155115 |    |
| siR_154893 | 1.4534   | 0.5594  | -1.37747965 | 0.000918153 | ** |
| siR_154902 | 0.01     | 3.431   | 8.42248532  | 1.85E-29    | ** |
| siR_154916 | 1.6661   | 1.8647  | 0.16246855  | 0.57929242  |    |
| siR_154918 | 4.1122   | 3.9159  | -0.07056651 | 0.718774464 |    |
| siR_154920 | 0.01     | 1.8274  | 7.51364865  | 4.92E-16    | ** |
| siR_154945 | 268.498  | 57.6563 | -2.21936118 | 0           | ** |
| siR_15496  | 0.01     | 3.17    | 8.30833903  | 2.84E-27    | ** |
| siR_154991 | 0.01     | 1.902   | 7.57137344  | 1.17E-16    | ** |
| siR_155008 | 1.0989   | 1.3799  | 0.32850361  | 0.350747427 |    |
| siR_155011 | 1.418    | 0.5221  | -1.44145947 | 0.000708453 | ** |
| siR_155015 | 0.01     | 1.7155  | 7.42248532  | 4.25E-15    | ** |
| siR_155017 | 133.8236 | 52.3979 | -1.35275166 | 2.39E-221   | ** |
| siR_155021 | 8.6498   | 2.4241  | -1.83521756 | 8.76E-24    | ** |
| siR_155026 | 2.2333   | 0.8951  | -1.31905629 | 6.54E-05    | ** |
| siR_155048 | 1.1698   | 0.2984  | -1.97094245 | 0.000133017 | ** |
| siR_155052 | 0.5317   | 1.4918  | 1.48836976  | 0.000340036 | ** |
| siR_155077 | 1.0989   | 1.1934  | 0.11901758  | 0.742571995 |    |
| siR_155078 | 1.3825   | 1.3426  | -0.04224993 | 0.902829273 |    |
| siR_155089 | 3.1905   | 4.065   | 0.34947282  | 0.088617697 |    |
| siR_155093 | 2.4106   | 2.7597  | 0.19511916  | 0.420702384 |    |
| siR_155098 | 1.2053   | 0.7832  | -0.62193961 | 0.120458422 |    |
| siR_155125 | 1.7725   | 0.5967  | -1.57070795 | 5.27E-05    | ** |
| siR_155133 | 3.6159   | 0.5967  | -2.5992771  | 8.42E-16    | ** |
| siR_155154 | 1.418    | 2.0885  | 0.55860961  | 0.060559179 |    |
| siR_155156 | 8.827    | 3.431   | -1.36329407 | 2.63E-16    | ** |
| siR_155176 | 12.7974  | 2.4241  | -2.40032961 | 7.81E-48    | ** |
| siR_155180 | 50.4098  | 15.8126 | -1.67262963 | 4.99E-115   | ** |
| siR_155187 | 71.4317  | 20.2133 | -1.82125958 | 1.99E-182   | ** |
| siR_155192 | 1.0989   | 0.5967  | -0.88098242 | 0.045030158 |    |
| siR_155237 | 0.01     | 1.3426  | 7.06888574  | 5.63E-12    | ** |
| siR_155247 | 0.01     | 1.1188  | 6.80580835  | 4.20E-10    | ** |
| siR_155251 | 0.01     | 1.0815  | 6.75688986  | 8.62E-10    | ** |
| siR_155252 | 0.01     | 1.4918  | 7.22091032  | 3.17E-13    | ** |
| siR_155276 | 1.0635   | 0.3729  | -1.51195933 | 0.00248896  | ** |
| siR_155277 | 27.97    | 8.0182  | -1.80252995 | 1.47E-71    | ** |
| siR_155292 | 3.0132   | 0.7459  | -2.0142423  | 3.24E-10    | ** |
| siR_155294 | 6.8773   | 1.6036  | -2.10052796 | 1.16E-22    | ** |
| siR_155300 | 1.0989   | 0.9323  | -0.23719393 | 0.547017649 |    |
| siR_155310 | 15.4916  | 10.7033 | -0.53343048 | 9.09E-07    |    |
| siR_155325 | 2.2333   | 0.5594  | -1.9972249  | 7.89E-08    | ** |
| siR_155339 | 3.2614   | 1.6036  | -1.02417707 | 7.68E-05    | ** |
| siR_155342 | 2.5169   | 2.0885  | -0.26918075 | 0.298578358 |    |
| siR_155344 | 1.028    | 0.1492  | -2.78452082 | 1.19E-05    | ** |
| siR_155345 | 38.7468  | 23.1595 | -0.74247306 | 1.84E-25    |    |
| siR_155354 | 1.0635   | 0.4848  | -1.13335843 | 0.015328041 | *  |



|            |         |         |             |             |    |
|------------|---------|---------|-------------|-------------|----|
| siR_15536  | 0.01    | 2.6852  | 8.06888574  | 3.25E-23    | ** |
| siR_155361 | 1.2053  | 0.9696  | -0.31393068 | 0.408887515 |    |
| siR_155362 | 3.5804  | 1.0069  | -1.83020036 | 1.23E-10    | ** |
| siR_155368 | 6.7     | 1.6409  | -2.02967377 | 3.16E-21    | ** |
| siR_155370 | 1.3116  | 0.6713  | -0.96629826 | 0.017699245 |    |
| siR_155373 | 2.5524  | 2.0139  | -0.34186239 | 0.189126184 |    |
| siR_155388 | 7.0545  | 4.7736  | -0.56346615 | 0.000506286 |    |
| siR_155392 | 1.2762  | 0.6713  | -0.92682489 | 0.023898405 |    |
| siR_155393 | 2.0561  | 0.7086  | -1.53686706 | 1.76E-05    | ** |
| siR_155394 | 2.4106  | 1.7528  | -0.45973089 | 0.092767644 |    |
| siR_155414 | 1.418   | 1.0069  | -0.49393712 | 0.170608303 |    |
| siR_155419 | 4.7148  | 2.3495  | -1.00484281 | 2.76E-06    | ** |
| siR_155445 | 1.2762  | 0.1119  | -3.5115725  | 4.57E-08    | ** |
| siR_155460 | 1.4534  | 0.8578  | -0.76071859 | 0.041292394 |    |
| siR_155465 | 7.409   | 5.8551  | -0.33958502 | 0.025530149 |    |
| siR_155507 | 2.6587  | 2.8343  | 0.09227147  | 0.693473673 |    |
| siR_155509 | 0.01    | 1.1188  | 6.80580835  | 4.20E-10    | ** |
| siR_15551  | 0.01    | 1.0815  | 6.75688986  | 8.62E-10    | ** |
| siR_155520 | 3.1905  | 0.9696  | -1.71832093 | 6.19E-09    | ** |
| siR_155531 | 2.446   | 1.7528  | -0.48076301 | 0.077630549 |    |
| siR_155547 | 1.8079  | 0.5967  | -1.5992372  | 3.50E-05    | ** |
| siR_15555  | 0.01    | 16.7077 | 10.70629743 | 1.36E-140   | ** |
| siR_155552 | 0.01    | 1.2307  | 6.94333532  | 4.86E-11    | ** |
| siR_155553 | 0.01    | 1.268   | 6.98641094  | 2.37E-11    | ** |
| siR_155565 | 0.01    | 1.3799  | 7.10841991  | 2.74E-12    | ** |
| siR_155594 | 1.6661  | 0.9696  | -0.78101339 | 0.025220231 |    |
| siR_15562  | 0.01    | 1.3799  | 7.10841991  | 2.74E-12    | ** |
| siR_155623 | 0.01    | 2.5733  | 8.00747585  | 2.81E-22    | ** |
| siR_155625 | 0.01    | 7.0112  | 9.45351758  | 1.99E-59    | ** |
| siR_155636 | 0.01    | 3.2073  | 8.32521549  | 1.38E-27    | ** |
| siR_155652 | 0.01    | 1.6409  | 7.35834351  | 1.79E-14    | ** |
| siR_155658 | 0.01    | 6.0789  | 9.24766648  | 1.27E-51    | ** |
| siR_155664 | 0.01    | 2.163   | 7.75688986  | 7.63E-19    | ** |
| siR_155675 | 5.5656  | 2.2749  | -1.2907341  | 4.74E-10    | ** |
| siR_155693 | 3.4032  | 2.536   | -0.42433719 | 0.063066798 |    |
| siR_155695 | 2.127   | 3.804   | 0.83869721  | 0.00028436  |    |
| siR_155719 | 0.01    | 2.0512  | 7.68032436  | 6.59E-18    | ** |
| siR_15574  | 0.01    | 2.0512  | 7.68032436  | 6.59E-18    | ** |
| siR_155782 | 1.5952  | 0.5967  | -1.41865963 | 0.000378908 | ** |
| siR_155811 | 2.3751  | 1.0442  | -1.18559019 | 0.000150776 | ** |
| siR_155855 | 8.0826  | 1.902   | -2.08730221 | 3.58E-26    | ** |
| siR_155867 | 1.7725  | 0.5221  | -1.76338756 | 1.14E-05    | ** |
| siR_155870 | 1.2407  | 0.8951  | -0.47103354 | 0.220381215 |    |
| siR_155902 | 15.9879 | 4.1023  | -1.96247555 | 1.74E-46    | ** |
| siR_15592  | 1.5243  | 0.3729  | -2.03128617 | 7.99E-06    | ** |
| siR_15593  | 1.2762  | 1.5663  | 0.29550613  | 0.367785826 |    |
| siR_155932 | 2.0561  | 1.529   | -0.42732203 | 0.147270898 |    |

|            |          |         |             |             |    |
|------------|----------|---------|-------------|-------------|----|
| siR_155941 | 0.01     | 3.1327  | 8.29126281  | 5.83E-27    | ** |
| siR_155944 | 0.01     | 8.503   | 9.73182813  | 6.48E-72    | ** |
| siR_155950 | 0.01     | 3.6175  | 8.49884921  | 5.10E-31    | ** |
| siR_155954 | 0.01     | 3.8413  | 8.58545083  | 6.83E-33    | ** |
| siR_155961 | 0.01     | 1.0069  | 6.6537766   | 3.63E-09    | ** |
| siR_155981 | 0.01     | 3.431   | 8.42248532  | 1.85E-29    | ** |
| siR_156000 | 27.4737  | 22.078  | -0.31544173 | 5.85E-05    |    |
| siR_156019 | 1.737    | 0.2984  | -2.54127831 | 4.51E-08    | ** |
| siR_156020 | 1.5243   | 0.2984  | -2.35282743 | 1.00E-06    | ** |
| siR_156056 | 1.2053   | 0.1119  | -3.42911034 | 1.49E-07    | ** |
| siR_156063 | 0.01     | 1.2307  | 6.94333532  | 4.86E-11    | ** |
| siR_156065 | 13.5064  | 8.2792  | -0.70607991 | 3.92E-09    |    |
| siR_156067 | 2.4815   | 1.1934  | -1.05613477 | 0.000413872 | ** |
| siR_156070 | 2.1624   | 5.8924  | 1.44622195  | 2.19E-12    | ** |
| siR_156071 | 0.6381   | 1.3053  | 1.03252698  | 0.011897015 | *  |
| siR_156094 | 1.0635   | 0.4102  | -1.37442064 | 0.004842593 | ** |
| siR_156095 | 2.1979   | 0.5967  | -1.88104807 | 3.08E-07    | ** |
| siR_156115 | 7.4799   | 2.9089  | -1.36254528 | 4.98E-14    | ** |
| siR_156141 | 17.8313  | 14.3954 | -0.30880401 | 0.001514298 |    |
| siR_156145 | 1.3471   | 1.529   | 0.18273146  | 0.573740676 |    |
| siR_156185 | 0.01     | 18.3113 | 10.8385185  | 5.11E-154   | ** |
| siR_156192 | 0.01     | 7.3842  | 9.52829782  | 1.50E-62    | ** |
| siR_156203 | 2.4106   | 0.634   | -1.92683753 | 4.98E-08    | ** |
| siR_156207 | 1.8788   | 1.8274  | -0.04001904 | 0.891828996 |    |
| siR_156218 | 0.01     | 1.4918  | 7.22091032  | 3.17E-13    | ** |
| siR_156259 | 0.01     | 1.1561  | 6.85312238  | 2.05E-10    | ** |
| siR_156266 | 30.6642  | 12.0832 | -1.34355274 | 1.26E-51    | ** |
| siR_156267 | 8.827    | 6.1908  | -0.51179735 | 0.000361314 |    |
| siR_156276 | 1.0635   | 0.3356  | -1.66400541 | 0.001193189 | ** |
| siR_156307 | 45.0569  | 50.3094 | 0.15907993  | 0.004777623 |    |
| siR_156314 | 241.8396 | 185.164 | -0.38524686 | 5.69E-47    |    |
| siR_156315 | 2.6587   | 1.9766  | -0.42770005 | 0.09837876  |    |
| siR_156323 | 58.7406  | 49.3398 | -0.25160613 | 2.13E-06    |    |
| siR_156328 | 0.01     | 1.9393  | 7.59939219  | 5.69E-17    | ** |
| siR_156332 | 0.01     | 1.4545  | 7.18437949  | 6.51E-13    | ** |
| siR_156354 | 1.5952   | 0.3729  | -2.09687661 | 3.09E-06    | ** |
| siR_156383 | 1.8788   | 2.4241  | 0.36763772  | 0.168463667 |    |
| siR_156408 | 0.01     | 4.0277  | 8.65381242  | 1.88E-34    | ** |
| siR_156411 | 2.5169   | 1.6782  | -0.58473324 | 0.032478093 |    |
| siR_156418 | 1.6307   | 0.9323  | -0.80662522 | 0.022857287 |    |
| siR_156432 | 0.01     | 1.4918  | 7.22091032  | 3.17E-13    | ** |
| siR_156447 | 1.418    | 0.9696  | -0.54839593 | 0.131795682 |    |
| siR_156454 | 1.7016   | 1.1934  | -0.51181426 | 0.120249063 |    |
| siR_156463 | 1.9852   | 1.2307  | -0.68980523 | 0.028100039 |    |
| siR_156473 | 0.01     | 16.5958 | 10.69660246 | 1.17E-139   | ** |
| siR_156474 | 0.01     | 1.8274  | 7.51364865  | 4.92E-16    | ** |
| siR_15648  | 2.9778   | 1.8647  | -0.67530332 | 0.008124333 |    |

|            |          |          |             |             |    |
|------------|----------|----------|-------------|-------------|----|
| siR_156484 | 0.01     | 26.3668  | 11.36450677 | 1.89E-221   | ** |
| siR_156485 | 0.01     | 4.4007   | 8.78158921  | 1.42E-37    | ** |
| siR_156486 | 0.01     | 1.3426   | 7.06888574  | 5.63E-12    | ** |
| siR_156488 | 0.01     | 5.6687   | 9.14687411  | 3.45E-48    | ** |
| siR_156498 | 0.01     | 21.5186  | 11.0713685  | 7.26E-181   | ** |
| siR_156499 | 0.01     | 2.4987   | 7.96503389  | 1.18E-21    | ** |
| siR_156524 | 0.01     | 27.1499  | 11.40673117 | 5.27E-228   | ** |
| siR_156526 | 0.01     | 4.2515   | 8.73182813  | 2.51E-36    | ** |
| siR_156534 | 0.01     | 9.0251   | 9.81779911  | 2.76E-76    | ** |
| siR_156541 | 0.01     | 53.2556  | 12.37871752 | 0           | ** |
| siR_156542 | 0.01     | 1.7528   | 7.45351758  | 2.07E-15    | ** |
| siR_156543 | 0.01     | 1.1934   | 6.89893387  | 9.98E-11    | ** |
| siR_156547 | 0.01     | 3.1327   | 8.29126281  | 5.83E-27    | ** |
| siR_156558 | 0.01     | 2.9462   | 8.20271156  | 2.12E-25    | ** |
| siR_156568 | 7.4445   | 3.804    | -0.96865771 | 1.05E-08    |    |
| siR_156581 | 3.545    | 1.0815   | -1.71275196 | 9.61E-10    | ** |
| siR_156598 | 5.7074   | 8.3538   | 0.54959893  | 0.000206789 |    |
| siR_156611 | 1.7725   | 1.3426   | -0.40075608 | 0.205441717 |    |
| siR_156619 | 1.1344   | 0.4102   | -1.46753004 | 0.002218064 | ** |
| siR_156622 | 7.409    | 2.797    | -1.40539858 | 1.66E-14    | ** |
| siR_156629 | 5.8847   | 2.0512   | -1.5205007  | 4.21E-13    | ** |
| siR_156630 | 1.9497   | 1.1188   | -0.80129999 | 0.013184917 |    |
| siR_156631 | 1.737    | 0.9323   | -0.89773158 | 0.01004128  |    |
| siR_156638 | 15.3144  | 6.4891   | -1.23879854 | 1.18E-23    | ** |
| siR_156642 | 187.4594 | 133.8104 | -0.48638792 | 1.13E-55    |    |
| siR_156643 | 4.6439   | 3.804    | -0.28781966 | 0.131063892 |    |
| siR_156657 | 1.9143   | 2.2003   | 0.2008833   | 0.45973483  |    |
| siR_156662 | 8.0117   | 6.34     | -0.33762556 | 0.020877329 |    |
| siR_156666 | 3.6513   | 2.7597   | -0.40389877 | 0.065824319 |    |
| siR_156674 | 0.01     | 1.0442   | 6.70625425  | 1.77E-09    | ** |
| siR_156679 | 1.028    | 0.7086   | -0.53679689 | 0.21005998  |    |
| siR_156692 | 1.737    | 0.4475   | -1.95663817 | 3.17E-06    | ** |
| siR_156701 | 2.1979   | 2.7225   | 0.3088063   | 0.215249316 |    |
| siR_156706 | 1.2053   | 1.7901   | 0.5706479   | 0.076727408 |    |
| siR_156711 | 5.2111   | 3.9531   | -0.39860349 | 0.02971038  |    |
| siR_156721 | 4.2894   | 2.163    | -0.98774219 | 1.05E-05    |    |
| siR_156737 | 0.01     | 10.5915  | 10.04869121 | 2.14E-89    | ** |
| siR_156743 | 0.01     | 11.673   | 10.18895967 | 1.89E-98    | ** |
| siR_156744 | 0.01     | 1.8274   | 7.51364865  | 4.92E-16    | ** |
| siR_156750 | 0.01     | 1.0442   | 6.70625425  | 1.77E-09    | ** |
| siR_156771 | 0.01     | 10.3304  | 10.0126804  | 3.27E-87    | ** |
| siR_156789 | 2.9778   | 3.2819   | 0.14028442  | 0.523526686 |    |
| siR_156794 | 0.01     | 4.2142   | 8.71911497  | 5.16E-36    | ** |
| siR_156796 | 0.01     | 10.3304  | 10.0126804  | 3.27E-87    | ** |
| siR_156799 | 2.2333   | 1.1188   | -0.9972249  | 0.001405726 |    |
| siR_1568   | 1.4889   | 0.1492   | -3.31892742 | 7.40E-09    | ** |
| siR_156808 | 13.3292  | 10.1439  | -0.39397777 | 0.000568633 |    |

|            |         |         |             |             |    |
|------------|---------|---------|-------------|-------------|----|
| siR_156809 | 1.9852  | 0.6713  | -1.56425481 | 1.94E-05    | ** |
| siR_156815 | 0.01    | 3.1327  | 8.29126281  | 5.83E-27    | ** |
| siR_156824 | 1.7016  | 0.4848  | -1.81143033 | 1.20E-05    | ** |
| siR_156825 | 1.028   | 0.1865  | -2.46259273 | 4.21E-05    | ** |
| siR_156834 | 3.1905  | 1.4918  | -1.0967284  | 3.55E-05    | ** |
| siR_156835 | 1.4534  | 0.2238  | -2.69914987 | 2.49E-07    | ** |
| siR_156837 | 0.01    | 2.4241  | 7.9213054   | 4.98E-21    | ** |
| siR_156844 | 0.01    | 1.6036  | 7.32517051  | 3.67E-14    | ** |
| siR_156847 | 1.028   | 0.5967  | -0.78476258 | 0.079326488 |    |
| siR_156848 | 2.4815  | 0.9323  | -1.41234628 | 9.16E-06    | ** |
| siR_156859 | 89.3693 | 34.8698 | -1.35780123 | 2.54E-149   | ** |
| siR_156862 | 1.3116  | 0.4848  | -1.4358662  | 0.001178471 | ** |
| siR_156874 | 3.864   | 1.0069  | -1.94017468 | 3.49E-12    | ** |
| siR_156883 | 0.01    | 1.268   | 6.98641094  | 2.37E-11    | ** |
| siR_156900 | 2.3397  | 2.0512  | -0.18985539 | 0.474284281 |    |
| siR_156904 | 0.01    | 5.1838  | 9.01786625  | 3.94E-44    | ** |
| siR_156913 | 0.01    | 6.4891  | 9.34187459  | 4.67E-55    | ** |
| siR_156922 | 1.2762  | 0.7832  | -0.70440177 | 0.074231739 |    |
| siR_156923 | 1.8788  | 0.3356  | -2.48499688 | 1.89E-08    | ** |
| siR_156929 | 2.2333  | 2.0139  | -0.14918501 | 0.580588091 |    |
| siR_156943 | 0.01    | 4.4007  | 8.78158921  | 1.42E-37    | ** |
| siR_156950 | 4.0413  | 1.4918  | -1.43776532 | 8.70E-09    | ** |
| siR_15698  | 1.028   | 0.634   | -0.69728552 | 0.113380175 |    |
| siR_156990 | 1.0635  | 0.7086  | -0.58577666 | 0.167596979 |    |
| siR_157016 | 0.01    | 2.8716  | 8.16571099  | 8.93E-25    | ** |
| siR_157023 | 0.01    | 1.3799  | 7.10841991  | 2.74E-12    | ** |
| siR_157046 | 1.5952  | 1.268   | -0.33118257 | 0.31565066  |    |
| siR_157054 | 0.01    | 1.5663  | 7.29121675  | 7.54E-14    | ** |
| siR_157058 | 0.01    | 1.268   | 6.98641094  | 2.37E-11    | ** |
| siR_157107 | 0.01    | 4.7736  | 8.89893387  | 1.07E-40    | ** |
| siR_157113 | 0.01    | 16.2228 | 10.66380713 | 1.55E-136   | ** |
| siR_157119 | 0.01    | 22.5255 | 11.13734341 | 2.70E-189   | ** |
| siR_157124 | 0.01    | 27.5975 | 11.43032187 | 9.45E-232   | ** |
| siR_157125 | 0.01    | 1.268   | 6.98641094  | 2.37E-11    | ** |
| siR_157136 | 3.3677  | 2.8343  | -0.24877116 | 0.26401606  |    |
| siR_157152 | 1.7016  | 1.268   | -0.42433719 | 0.190952453 |    |
| siR_157153 | 3.9704  | 1.6782  | -1.2423697  | 3.42E-07    | ** |
| siR_157161 | 0.01    | 1.268   | 6.98641094  | 2.37E-11    | ** |
| siR_157183 | 0.01    | 2.0512  | 7.68032436  | 6.59E-18    | ** |
| siR_157205 | 23.7869 | 20.5489 | -0.2111061  | 0.010833665 |    |
| siR_157213 | 0.01    | 16.7449 | 10.70950605 | 6.60E-141   | ** |
| siR_157223 | 1.2407  | 0.5594  | -1.14920216 | 0.007946935 | ** |
| siR_157242 | 75.9338 | 55.5679 | -0.45049049 | 1.13E-20    |    |
| siR_157243 | 1.3825  | 0.634   | -1.12472473 | 0.005814363 | ** |
| siR_157247 | 2.3397  | 1.1934  | -0.97124588 | 0.001378704 |    |
| siR_157266 | 0.01    | 1.3799  | 7.10841991  | 2.74E-12    | ** |
| siR_157272 | 0.01    | 29.4622 | 11.52464945 | 2.32E-247   | ** |

|            |         |         |             |             |    |
|------------|---------|---------|-------------|-------------|----|
| siR_157273 | 0.01    | 1.4172  | 7.14689956  | 1.34E-12    | ** |
| siR_157278 | 0.01    | 12.3443 | 10.26962931 | 4.54E-104   | ** |
| siR_157285 | 0.01    | 1.6782  | 7.39077085  | 8.72E-15    | ** |
| siR_157289 | 0.01    | 5.6314  | 9.13734982  | 7.07E-48    | ** |
| siR_157290 | 0.01    | 4.4007  | 8.78158921  | 1.42E-37    | ** |
| siR_157310 | 1.2762  | 0.0746  | -4.096535   | 6.83E-09    | ** |
| siR_157316 | 0.01    | 1.4918  | 7.22091032  | 3.17E-13    | ** |
| siR_15733  | 42.469  | 10.1439 | -2.06579771 | 7.67E-129   | ** |
| siR_157332 | 0.01    | 9.0997  | 9.82967517  | 6.56E-77    | ** |
| siR_157347 | 0.01    | 7.5707  | 9.56428289  | 4.13E-64    | ** |
| siR_157354 | 0.01    | 1.7901  | 7.48389637  | 1.01E-15    | ** |
| siR_15737  | 1.2407  | 0.5221  | -1.24875625 | 0.004597643 | ** |
| siR_157398 | 1.5598  | 1.1934  | -0.38628337 | 0.251737362 |    |
| siR_15740  | 0.01    | 4.699   | 8.87620996  | 4.51E-40    | ** |
| siR_157408 | 1.2762  | 0.4475  | -1.51189485 | 0.000890445 | ** |
| siR_157425 | 0.01    | 1.6409  | 7.35834351  | 1.79E-14    | ** |
| siR_157429 | 0.01    | 1.9393  | 7.59939219  | 5.69E-17    | ** |
| siR_157451 | 0.01    | 1.6782  | 7.39077085  | 8.72E-15    | ** |
| siR_157459 | 5.2466  | 1.9393  | -1.43584681 | 5.50E-11    | ** |
| siR_157464 | 0.01    | 1.9766  | 7.62687714  | 2.78E-17    | ** |
| siR_157466 | 1.8079  | 1.0442  | -0.79191682 | 0.018215001 |    |
| siR_157467 | 1.2407  | 1.0069  | -0.30123391 | 0.420129598 |    |
| siR_157468 | 1.2053  | 0.4475  | -1.42943269 | 0.001965568 | ** |
| siR_157470 | 1.9497  | 0.4102  | -2.24885276 | 6.65E-08    | ** |
| siR_157487 | 1.1698  | 0.8578  | -0.44754867 | 0.256675186 |    |
| siR_157525 | 4.8566  | 4.0277  | -0.26999044 | 0.146219101 |    |
| siR_157539 | 1.2053  | 0.7459  | -0.69233815 | 0.087734995 |    |
| siR_157560 | 0.01    | 2.4614  | 7.94333532  | 2.43E-21    | ** |
| siR_157561 | 0.01    | 1.6782  | 7.39077085  | 8.72E-15    | ** |
| siR_157562 | 0.01    | 1.0442  | 6.70625425  | 1.77E-09    | ** |
| siR_157565 | 0.01    | 1.529   | 7.2564446   | 1.55E-13    | ** |
| siR_157577 | 0.01    | 2.163   | 7.75688986  | 7.63E-19    | ** |
| siR_157585 | 8.5789  | 7.6825  | -0.15921681 | 0.245065239 |    |
| siR_157591 | 1.2762  | 0.2238  | -2.5115725  | 3.57E-06    | ** |
| siR_157601 | 1.2053  | 0.3729  | -1.69253158 | 0.000467353 | ** |
| siR_157607 | 0.01    | 7.869   | 9.6200365   | 1.31E-66    | ** |
| siR_157617 | 70.9354 | 14.209  | -2.31970075 | 5.38E-247   | ** |
| siR_157620 | 44.5251 | 16.0737 | -1.46991679 | 1.11E-84    | ** |
| siR_15764  | 0.01    | 1.0069  | 6.6537766   | 3.63E-09    | ** |
| siR_157665 | 97.0265 | 60.2296 | -0.68790615 | 8.87E-54    |    |
| siR_157666 | 2.8714  | 2.2376  | -0.35980216 | 0.143610387 |    |
| siR_157676 | 0.01    | 1.3053  | 7.02823761  | 1.15E-11    | ** |
| siR_157687 | 0.01    | 1.9393  | 7.59939219  | 5.69E-17    | ** |
| siR_157689 | 0.01    | 1.1934  | 6.89893387  | 9.98E-11    | ** |
| siR_157697 | 7.2672  | 2.3868  | -1.60632193 | 4.89E-17    | ** |
| siR_157704 | 1.2053  | 0.5594  | -1.10744012 | 0.01113063  | *  |
| siR_157705 | 12.3366 | 4.065   | -1.60161758 | 9.35E-28    | ** |

|            |           |          |              |              |    |
|------------|-----------|----------|--------------|--------------|----|
| siR_157709 | 1. 0635   | 0. 5967  | -0. 83374235 | 0. 060029399 |    |
| siR_157731 | 0. 01     | 1. 0815  | 6. 75688986  | 8. 62E-10    | ** |
| siR_157741 | 2. 0206   | 1. 6036  | -0. 33346943 | 0. 254622539 |    |
| siR_157757 | 2. 6233   | 1. 0442  | -1. 32898474 | 1. 32E-05    | ** |
| siR_157763 | 4. 5021   | 4. 8482  | 0. 10685111  | 0. 552292504 |    |
| siR_157775 | 0. 01     | 1. 1561  | 6. 85312238  | 2. 05E-10    | ** |
| siR_157777 | 3. 155    | 2. 6106  | -0. 27325858 | 0. 237071212 |    |
| siR_15778  | 0. 5672   | 2. 0139  | 1. 82806261  | 1. 34E-06    | ** |
| siR_157793 | 0. 01     | 2. 6106  | 8. 02823761  | 1. 37E-22    | ** |
| siR_157794 | 6. 8773   | 3. 1327  | -1. 13443566 | 3. 94E-10    | ** |
| siR_15780  | 2. 7296   | 1. 6409  | -0. 73420223 | 0. 006418645 |    |
| siR_157808 | 2. 6587   | 2. 2376  | -0. 24876884 | 0. 321723987 |    |
| siR_157826 | 1. 8434   | 0. 7086  | -1. 37932579 | 0. 000179389 | ** |
| siR_157827 | 1. 3471   | 0. 7086  | -0. 92681358 | 0. 020219118 |    |
| siR_157830 | 0. 01     | 4. 2515  | 8. 73182813  | 2. 51E-36    | ** |
| siR_157835 | 0. 01     | 3. 9531  | 8. 62684064  | 7. 90E-34    | ** |
| siR_157839 | 0. 01     | 10. 8898 | 10. 08876174 | 6. 79E-92    | ** |
| siR_157844 | 0. 01     | 8. 8386  | 9. 78767406  | 1. 00E-74    | ** |
| siR_157871 | 1. 5598   | 0. 2238  | -2. 80107912 | 4. 88E-08    | ** |
| siR_157875 | 0. 01     | 3. 17    | 8. 30833903  | 2. 84E-27    | ** |
| siR_157879 | 0. 01     | 2. 2749  | 7. 82965932  | 8. 83E-20    | ** |
| siR_157883 | 0. 01     | 3. 0954  | 8. 27398204  | 1. 20E-26    | ** |
| siR_157887 | 0. 01     | 2. 6106  | 8. 02823761  | 1. 37E-22    | ** |
| siR_157912 | 0. 6735   | 1. 268   | 0. 91280489  | 0. 02525345  |    |
| siR_157934 | 1. 028    | 0. 0373  | -4. 78452082 | 6. 17E-08    | ** |
| siR_157938 | 0. 01     | 1. 3053  | 7. 02823761  | 1. 15E-11    | ** |
| siR_157946 | 0. 01     | 1. 9766  | 7. 62687714  | 2. 78E-17    | ** |
| siR_157952 | 1. 5598   | 1. 3799  | -0. 17679734 | 0. 587407247 |    |
| siR_157958 | 0. 01     | 6. 601   | 9. 36654079  | 5. 41E-56    | ** |
| siR_157967 | 0. 6381   | 1. 529   | 1. 26073397  | 0. 001382912 | ** |
| siR_157982 | 1. 8434   | 2. 3122  | 0. 32689704  | 0. 228299844 |    |
| siR_157985 | 91. 3191  | 88. 6848 | -0. 04222978 | 0. 303537849 |    |
| siR_157989 | 8. 7916   | 7. 5707  | -0. 21569905 | 0. 114278146 |    |
| siR_157994 | 9. 8551   | 6. 1535  | -0. 67946329 | 1. 17E-06    |    |
| siR_158    | 10. 635   | 6. 4518  | -0. 72104641 | 1. 04E-07    |    |
| siR_158000 | 0. 01     | 1. 9393  | 7. 59939219  | 5. 69E-17    | ** |
| siR_158013 | 4. 2185   | 5. 8924  | 0. 48212527  | 0. 005696932 |    |
| siR_158030 | 0. 01     | 6. 0416  | 9. 23878686  | 2. 60E-51    | ** |
| siR_158036 | 24. 4605  | 7. 9063  | -1. 62937929 | 1. 02E-54    | ** |
| siR_158040 | 1. 028    | 0. 7086  | -0. 53679689 | 0. 21005998  |    |
| siR_158045 | 0. 01     | 1. 529   | 7. 2564446   | 1. 55E-13    | ** |
| siR_158069 | 1. 9852   | 1. 8274  | -0. 1194919  | 0. 675870961 |    |
| siR_158096 | 571. 2051 | 369. 433 | -0. 62869612 | 2. 72E-262   |    |
| siR_158097 | 1. 4889   | 3. 2073  | 1. 10711244  | 2. 71E-05    | ** |
| siR_158098 | 2. 3397   | 1. 9393  | -0. 27078756 | 0. 313838403 |    |
| siR_158115 | 2. 6233   | 0. 8205  | -1. 67680756 | 2. 30E-07    | ** |
| siR_158117 | 0. 01     | 2. 9089  | 8. 18432989  | 4. 35E-25    | ** |

|            |          |          |             |             |    |
|------------|----------|----------|-------------|-------------|----|
| siR_15813  | 2.0561   | 0.2238   | -3.19962849 | 1.87E-11    | ** |
| siR_158147 | 0.01     | 1.7528   | 7.45351758  | 2.07E-15    | ** |
| siR_15815  | 1.5598   | 0.5967   | -1.38628337 | 0.000554254 | ** |
| siR_158150 | 2.0206   | 0.8205   | -1.30020851 | 0.000175091 | ** |
| siR_158152 | 0.9217   | 1.1188   | 0.279583    | 0.470644087 |    |
| siR_158167 | 0.01     | 6.8621   | 9.42250634  | 3.53E-58    | ** |
| siR_158170 | 0.5672   | 16.4093  | 4.85451235  | 1.33E-113   | ** |
| siR_158174 | 0.01     | 10.8152  | 10.07884463 | 2.86E-91    | ** |
| siR_158178 | 1.418    | 0.4848   | -1.54839593 | 0.00035749  | ** |
| siR_158179 | 1.6307   | 0.3729   | -2.12863069 | 1.91E-06    | ** |
| siR_158186 | 2.2333   | 1.7528   | -0.34951567 | 0.210211825 |    |
| siR_15819  | 1.9497   | 1.268    | -0.62069741 | 0.047504913 |    |
| siR_158192 | 0.6381   | 1.0442   | 0.71054362  | 0.101902462 |    |
| siR_158200 | 0.01     | 2.0139   | 7.65384824  | 1.35E-17    | ** |
| siR_158205 | 0.01     | 6.4518   | 9.33355791  | 9.59E-55    | ** |
| siR_158214 | 0.01     | 51.0926  | 12.31889864 | 0           | ** |
| siR_158223 | 0.01     | 23.4205  | 11.19355616 | 8.70E-197   | ** |
| siR_158224 | 0.01     | 2.3495   | 7.87620996  | 2.10E-20    | ** |
| siR_158231 | 0.01     | 2.3495   | 7.87620996  | 2.10E-20    | ** |
| siR_158238 | 0.01     | 1.1934   | 6.89893387  | 9.98E-11    | ** |
| siR_158246 | 0.01     | 2.2003   | 7.78155643  | 3.72E-19    | ** |
| siR_158248 | 7.09     | 6.3027   | -0.16981563 | 0.260767713 |    |
| siR_158255 | 2.9069   | 1.0442   | -1.47708338 | 6.68E-07    | ** |
| siR_158272 | 0.01     | 1.8647   | 7.54279973  | 2.40E-16    | ** |
| siR_158275 | 1.3825   | 0.5221   | -1.40488142 | 0.001042064 | ** |
| siR_158279 | 44.4542  | 28.94    | -0.61925481 | 1.74E-21    |    |
| siR_158280 | 1.028    | 0.4848   | -1.08437866 | 0.021479092 | *  |
| siR_158300 | 0.9571   | 1.0069   | 0.07317884  | 0.850192588 |    |
| siR_158330 | 1.8434   | 1.0069   | -0.87244875 | 0.009591885 |    |
| siR_158336 | 1.418    | 0.7832   | -0.85640486 | 0.025717571 |    |
| siR_158347 | 1.3825   | 2.2749   | 0.71852365  | 0.014263736 |    |
| siR_158355 | 1.8788   | 1.4172   | -0.40676813 | 0.185934578 |    |
| siR_158359 | 18.7176  | 7.4588   | -1.32738001 | 1.33E-31    | ** |
| siR_158365 | 0.01     | 3.3937   | 8.40671523  | 3.81E-29    | ** |
| siR_158381 | 0.01     | 1.268    | 6.98641094  | 2.37E-11    | ** |
| siR_158400 | 0.01     | 12.3443  | 10.26962931 | 4.54E-104   | ** |
| siR_158404 | 0.01     | 7.9809   | 9.64040764  | 1.52E-67    | ** |
| siR_158421 | 2.9069   | 1.4918   | -0.96242731 | 0.000394025 |    |
| siR_158443 | 9.8196   | 3.3937   | -1.53280522 | 4.05E-21    | ** |
| siR_158457 | 1.1344   | 0.5221   | -1.11953137 | 0.013060942 | *  |
| siR_158467 | 1.7016   | 1.0069   | -0.75697153 | 0.027686419 |    |
| siR_158470 | 344.5381 | 228.3503 | -0.59341484 | 1.23E-143   |    |
| siR_158476 | 1.9497   | 1.1188   | -0.80129999 | 0.013184917 |    |
| siR_158479 | 0.01     | 2.7225   | 8.08878824  | 1.58E-23    | ** |
| siR_158483 | 0.01     | 56.985   | 12.4763665  | 0           | ** |
| siR_158484 | 0.01     | 1.0069   | 6.6537766   | 3.63E-09    | ** |
| siR_158492 | 0.01     | 7.6825   | 9.58543205  | 4.78E-65    | ** |

|            |          |          |             |             |    |
|------------|----------|----------|-------------|-------------|----|
| siR_158493 | 0.01     | 6.8621   | 9.42250634  | 3.53E-58    | ** |
| siR_158494 | 0.01     | 3.1327   | 8.29126281  | 5.83E-27    | ** |
| siR_158495 | 0.01     | 1.6036   | 7.32517051  | 3.67E-14    | ** |
| siR_158532 | 3.0132   | 1.3426   | -1.16626689 | 2.44E-05    | ** |
| siR_158554 | 5.8138   | 3.9904   | -0.54294807 | 0.002279745 |    |
| siR_158556 | 0.01     | 6.6383   | 9.37467002  | 2.63E-56    | ** |
| siR_158563 | 10.4932  | 4.6244   | -1.18211661 | 1.32E-15    | ** |
| siR_158571 | 0.01     | 4.3634   | 8.76930892  | 2.91E-37    | ** |
| siR_158574 | 0.01     | 9.7337   | 9.9268445   | 3.23E-82    | ** |
| siR_158586 | 1.1698   | 0.3729   | -1.64940119 | 0.000716423 | ** |
| siR_158593 | 3.8995   | 7.0112   | 0.84637224  | 6.62E-07    |    |
| siR_158598 | 1.4889   | 3.3937   | 1.18861218  | 4.86E-06    | ** |
| siR_158612 | 1.6307   | 0.8951   | -0.86537062 | 0.015654369 |    |
| siR_158613 | 2.5878   | 1.3053   | -0.9873447  | 0.000642325 |    |
| siR_158616 | 0.01     | 89.095   | 13.12112875 | 0           | ** |
| siR_158617 | 0.01     | 1.8274   | 7.51364865  | 4.92E-16    | ** |
| siR_158622 | 0.01     | 14.6938  | 10.52099183 | 9.77E-124   | ** |
| siR_158623 | 0.01     | 2.3868   | 7.89893387  | 1.02E-20    | ** |
| siR_158627 | 0.01     | 2.2003   | 7.78155643  | 3.72E-19    | ** |
| siR_158631 | 0.01     | 3.3192   | 8.37469175  | 1.60E-28    | ** |
| siR_158661 | 0.01     | 9.7337   | 9.9268445   | 3.23E-82    | ** |
| siR_158664 | 0.01     | 6.3027   | 9.29982618  | 1.70E-53    | ** |
| siR_158670 | 0.01     | 2.8343   | 8.14684866  | 1.83E-24    | ** |
| siR_158672 | 8.1535   | 3.9904   | -1.03088612 | 2.87E-10    | ** |
| siR_158673 | 32.8267  | 18.7588  | -0.80730218 | 5.82E-25    |    |
| siR_158679 | 7.5863   | 12.6053  | 0.73256212  | 3.89E-09    |    |
| siR_158682 | 1.5952   | 0.634    | -1.33118257 | 0.000706761 | ** |
| siR_158684 | 0.01     | 8.2792   | 9.69334756  | 4.84E-70    | ** |
| siR_158704 | 3.5095   | 1.2307   | -1.51178638 | 2.66E-08    | ** |
| siR_158718 | 4.3603   | 1.7528   | -1.31476601 | 2.32E-08    | ** |
| siR_158730 | 2.5524   | 0.7832   | -1.70440177 | 2.46E-07    | ** |
| siR_15874  | 0.01     | 1.902    | 7.57137344  | 1.17E-16    | ** |
| siR_158740 | 4.5021   | 1.9393   | -1.2150621  | 9.36E-08    | ** |
| siR_158742 | 2.2333   | 1.529    | -0.54658866 | 0.058239868 |    |
| siR_158745 | 1.1344   | 0.4102   | -1.46753004 | 0.002218064 | ** |
| siR_158776 | 0.01     | 1.7901   | 7.48389637  | 1.01E-15    | ** |
| siR_158782 | 0.01     | 4.2888   | 8.74443023  | 1.22E-36    | ** |
| siR_158799 | 0.8862   | 1.6409   | 0.88878309  | 0.012627062 |    |
| siR_158871 | 1.2762   | 0.9696   | -0.39639284 | 0.289463081 |    |
| siR_158886 | 8.8625   | 5.2957   | -0.74289233 | 6.27E-07    |    |
| siR_158897 | 0.01     | 4.7363   | 8.88761665  | 2.20E-40    | ** |
| siR_158902 | 0.01     | 6.5264   | 9.3501436   | 2.28E-55    | ** |
| siR_158912 | 2.0206   | 0.8951   | -1.17466298 | 0.000528718 | ** |
| siR_158928 | 0.01     | 15.1786  | 10.56782301 | 8.54E-128   | ** |
| siR_158929 | 2.836    | 3.0208   | 0.09107314  | 0.68789902  |    |
| siR_158968 | 295.7944 | 131.7592 | -1.16669104 | 0           | ** |
| siR_158969 | 1.0989   | 0.3729   | -1.5591994  | 0.001653799 | ** |



|            |          |         |             |             |    |
|------------|----------|---------|-------------|-------------|----|
| siR_158988 | 1.737    | 0.5221  | -1.73419969 | 1.76E-05    | ** |
| siR_159003 | 1.1344   | 0.2611  | -2.11925507 | 8.17E-05    | ** |
| siR_159008 | 3.2968   | 1.1188  | -1.55911421 | 3.54E-08    | ** |
| siR_159042 | 3.4032   | 1.3426  | -1.34186239 | 5.52E-07    | ** |
| siR_159052 | 0.01     | 1.7901  | 7.48389637  | 1.01E-15    | ** |
| siR_159055 | 1.3116   | 0.5967  | -1.13625012 | 0.006797934 | ** |
| siR_159069 | 1.2762   | 0.1865  | -2.7746069  | 9.92E-07    | ** |
| siR_159074 | 0.9217   | 1.268   | 0.46018559  | 0.221358078 |    |
| siR_159102 | 0.01     | 1.7155  | 7.42248532  | 4.25E-15    | ** |
| siR_159107 | 0.01     | 17.0806 | 10.73814294 | 1.02E-143   | ** |
| siR_159112 | 0.01     | 2.3122  | 7.85312238  | 4.30E-20    | ** |
| siR_159115 | 0.01     | 2.9089  | 8.18432989  | 4.35E-25    | ** |
| siR_159138 | 0.01     | 2.3868  | 7.89893387  | 1.02E-20    | ** |
| siR_159162 | 3.9704   | 3.2819  | -0.27475308 | 0.181946666 |    |
| siR_159168 | 1.3825   | 0.2238  | -2.62699754 | 7.30E-07    | ** |
| siR_159181 | 4.7503   | 2.4614  | -0.9485395  | 7.26E-06    |    |
| siR_159184 | 0.01     | 1.902   | 7.57137344  | 1.17E-16    | ** |
| siR_15919  | 1.9497   | 0.9696  | -1.00779055 | 0.002643244 | ** |
| siR_159197 | 0.01     | 1.902   | 7.57137344  | 1.17E-16    | ** |
| siR_159200 | 2.0206   | 0.4848  | -2.05932215 | 1.94E-07    | ** |
| siR_159213 | 10.2805  | 2.5733  | -1.99821887 | 3.72E-31    | ** |
| siR_159223 | 0.01     | 1.3799  | 7.10841991  | 2.74E-12    | ** |
| siR_159230 | 0.01     | 1.4545  | 7.18437949  | 6.51E-13    | ** |
| siR_159237 | 0.01     | 1.4918  | 7.22091032  | 3.17E-13    | ** |
| siR_159242 | 4.4667   | 2.3122  | -0.94994317 | 1.33E-05    |    |
| siR_159243 | 1.9143   | 0.5221  | -1.87441888 | 1.95E-06    | ** |
| siR_159261 | 2.1624   | 1.1934  | -0.85755573 | 0.005629017 |    |
| siR_159316 | 0.01     | 1.9766  | 7.62687714  | 2.78E-17    | ** |
| siR_159334 | 0.01     | 1.268   | 6.98641094  | 2.37E-11    | ** |
| siR_159345 | 0.01     | 1.9393  | 7.59939219  | 5.69E-17    | ** |
| siR_159392 | 1.8434   | 0.5221  | -1.81997109 | 4.74E-06    | ** |
| siR_159409 | 119.8208 | 70.9702 | -0.75559309 | 2.01E-77    |    |
| siR_159419 | 1.2053   | 0.634   | -0.92683753 | 0.028276658 |    |
| siR_159420 | 141.9416 | 64.9659 | -1.12754291 | 7.96E-177   | ** |
| siR_159421 | 1.7725   | 0.5594  | -1.66383347 | 2.51E-05    | ** |
| siR_159425 | 3.0841   | 1.0069  | -1.61492913 | 4.59E-08    | ** |
| siR_159498 | 20.2774  | 9.9575  | -1.0260172  | 3.48E-23    | ** |
| siR_159539 | 0.01     | 2.5733  | 8.00747585  | 2.81E-22    | ** |
| siR_159540 | 5.282    | 4.9601  | -0.09071509 | 0.600019445 |    |
| siR_159542 | 4.0767   | 3.9904  | -0.03086842 | 0.875534385 |    |
| siR_159557 | 0.01     | 3.6175  | 8.49884921  | 5.10E-31    | ** |
| siR_159560 | 0.01     | 1.7155  | 7.42248532  | 4.25E-15    | ** |
| siR_159577 | 2.6587   | 0.8578  | -1.63200778 | 3.24E-07    | ** |
| siR_159595 | 1.9497   | 1.4545  | -0.42272886 | 0.162432979 |    |
| siR_159627 | 7.409    | 4.699   | -0.65692507 | 4.35E-05    |    |
| siR_159628 | 15.5625  | 6.5637  | -1.24549263 | 3.35E-24    | ** |
| siR_159666 | 3.2968   | 0.6713  | -2.29603682 | 9.00E-13    | ** |

|            |         |         |             |             |    |
|------------|---------|---------|-------------|-------------|----|
| siR_159692 | 0.8508  | 1.0069  | 0.24302847  | 0.549089802 |    |
| siR_159701 | 0.01    | 1.7155  | 7.42248532  | 4.25E-15    | ** |
| siR_159727 | 0.8862  | 1.1188  | 0.33624793  | 0.390862943 |    |
| siR_159745 | 0.01    | 1.3426  | 7.06888574  | 5.63E-12    | ** |
| siR_159756 | 11.5921 | 3.17    | -1.8705872  | 3.95E-32    | ** |
| siR_159762 | 9.8196  | 6.8994  | -0.50919335 | 0.000180156 |    |
| siR_159784 | 1.1698  | 0.2984  | -1.97094245 | 0.000133017 | ** |
| siR_159804 | 3.0487  | 2.1258  | -0.52018832 | 0.034010884 |    |
| siR_159807 | 1.5952  | 0.1492  | -3.41841787 | 1.28E-09    | ** |
| siR_159835 | 2.3751  | 0.5221  | -2.18559019 | 4.40E-09    | ** |
| siR_15984  | 2.9423  | 3.3192  | 0.17389121  | 0.429572359 |    |
| siR_159854 | 8.827   | 3.2073  | -1.46056389 | 6.33E-18    | ** |
| siR_159862 | 2.9423  | 1.529   | -0.94435595 | 0.000448467 |    |
| siR_159875 | 2.4106  | 1.1561  | -1.06012609 | 0.000482579 | ** |
| siR_159911 | 1.9497  | 0.2611  | -2.90057779 | 4.66E-10    | ** |
| siR_159919 | 3.3323  | 1.0442  | -1.67412023 | 5.45E-09    | ** |
| siR_159933 | 0.01    | 16.7822 | 10.71271614 | 3.22E-141   | ** |
| siR_159937 | 0.01    | 10.2185 | 9.99696772  | 2.83E-86    | ** |
| siR_159938 | 0.01    | 2.0885  | 7.70632333  | 3.21E-18    | ** |
| siR_159939 | 0.01    | 1.268   | 6.98641094  | 2.37E-11    | ** |
| siR_159959 | 2.5524  | 0.4475  | -2.51189485 | 3.73E-11    | ** |
| siR_159961 | 19.6393 | 19.4674 | -0.01268329 | 0.886287103 |    |
| siR_159963 | 62.4628 | 66.0101 | 0.07968954  | 0.100671718 |    |
| siR_159964 | 3.7931  | 5.7433  | 0.59850252  | 0.000898852 |    |
| siR_159965 | 0.8508  | 1.1561  | 0.44237425  | 0.260344882 |    |
| siR_159966 | 1.2407  | 0.7459  | -0.73410018 | 0.068100939 |    |
| siR_159972 | 38.4278 | 30.3199 | -0.34188539 | 2.92E-07    |    |
| siR_159982 | 3.5804  | 0.9323  | -1.9412546  | 2.14E-11    | ** |
| siR_16000  | 1.2053  | 0.5221  | -1.20699422 | 0.006557539 | ** |
| siR_160012 | 0.01    | 5.8924  | 9.20271156  | 4.62E-50    | ** |
| siR_160014 | 0.9926  | 1.529   | 0.62330405  | 0.076934576 |    |
| siR_160038 | 1.3825  | 0.4102  | -1.75288008 | 0.0001191   | ** |
| siR_160054 | 1.3116  | 0.6713  | -0.96629826 | 0.017699245 |    |
| siR_160060 | 1.3471  | 0.4475  | -1.58989736 | 0.000394142 | ** |
| siR_160061 | 1.2053  | 0.1492  | -3.01407284 | 7.31E-07    | ** |
| siR_160082 | 1.7725  | 0.3356  | -2.40097101 | 8.87E-08    | ** |
| siR_160086 | 5.8847  | 1.7528  | -1.74730748 | 1.16E-15    | ** |
| siR_160130 | 0.9217  | 1.268   | 0.46018559  | 0.221358078 |    |
| siR_160155 | 0.01    | 2.1258  | 7.73186206  | 1.57E-18    | ** |
| siR_160164 | 1.4534  | 1.7155  | 0.23919731  | 0.440649407 |    |
| siR_160167 | 14.6054 | 9.2489  | -0.65914817 | 8.25E-09    |    |
| siR_160170 | 1.1344  | 0.4848  | -1.22646783 | 0.007625228 | ** |
| siR_160177 | 6.3101  | 0.634   | -3.31510812 | 1.61E-33    | ** |
| siR_16018  | 3.0132  | 1.4918  | -1.0142423  | 0.000163869 | ** |
| siR_160209 | 3.6868  | 1.8274  | -1.0125767  | 3.08E-05    | ** |
| siR_160225 | 1.0635  | 1.1188  | 0.07313213  | 0.842404071 |    |
| siR_160231 | 22.1917 | 4.9601  | -2.16157908 | 3.99E-72    | ** |

|            |          |          |              |              |    |
|------------|----------|----------|--------------|--------------|----|
| siR_160245 | 1. 7725  | 1. 7155  | -0. 0471565  | 0. 876375679 |    |
| siR_160247 | 0. 01    | 6. 34    | 9. 30833903  | 8. 28E-54    | ** |
| siR_160267 | 0. 01    | 11. 3    | 10. 14210706 | 2. 50E-95    | ** |
| siR_160273 | 23. 397  | 27. 5975 | 0. 23821403  | 0. 002023688 |    |
| siR_160279 | 0. 01    | 2. 2003  | 7. 78155643  | 3. 72E-19    | ** |
| siR_160282 | 62. 1438 | 26. 143  | -1. 24918576 | 5. 15E-92    | ** |
| siR_160283 | 1. 6661  | 0. 8578  | -0. 95776177 | 0. 007792404 |    |
| siR_160285 | 45. 0923 | 14. 2836 | -1. 65852146 | 7. 03E-102   | ** |
| siR_160286 | 1. 3471  | 0. 5594  | -1. 26790479 | 0. 002777337 | ** |
| siR_160293 | 16. 0588 | 6. 6756  | -1. 26639467 | 1. 55E-25    | ** |
| siR_160303 | 1. 0635  | 0. 4848  | -1. 13335843 | 0. 015328041 | *  |
| siR_160322 | 6. 0265  | 3. 6548  | -0. 72152791 | 6. 28E-05    |    |
| siR_160327 | 0. 01    | 18. 5351 | 10. 85604418 | 6. 84E-156   | ** |
| siR_160331 | 0. 01    | 60. 0058 | 12. 55088624 | 0            | ** |
| siR_160332 | 0. 01    | 1. 1934  | 6. 89893387  | 9. 98E-11    | ** |
| siR_160369 | 1. 028   | 0. 1865  | -2. 46259273 | 4. 21E-05    | ** |
| siR_160378 | 1. 1698  | 0. 634   | -0. 88370715 | 0. 037954945 |    |
| siR_160382 | 0. 01    | 1. 4918  | 7. 22091032  | 3. 17E-13    | ** |
| siR_160395 | 0. 01    | 26. 3668 | 11. 36450677 | 1. 89E-221   | ** |
| siR_16040  | 4. 5376  | 3. 3192  | -0. 45109388 | 0. 022971104 |    |
| siR_160400 | 0. 01    | 3. 9904  | 8. 64038956  | 3. 85E-34    | ** |
| siR_160401 | 0. 01    | 2. 3868  | 7. 89893387  | 1. 02E-20    | ** |
| siR_16042  | 16. 4133 | 7. 1604  | -1. 19675324 | 5. 49E-24    | ** |
| siR_16045  | 1. 5598  | 0. 7086  | -1. 13831769 | 0. 003056445 | ** |
| siR_160479 | 4. 3249  | 2. 1258  | -1. 0246609  | 5. 08E-06    | ** |
| siR_160480 | 1. 737   | 1. 0069  | -0. 78667734 | 0. 021426921 |    |
| siR_16050  | 1. 0989  | 0. 7832  | -0. 48860744 | 0. 233779461 |    |
| siR_160505 | 2. 0206  | 0. 9696  | -1. 05932215 | 0. 0014271   | ** |
| siR_160532 | 0. 01    | 1. 1561  | 6. 85312238  | 2. 05E-10    | ** |
| siR_160534 | 2. 4106  | 2. 4241  | 0. 00805694  | 0. 972091537 |    |
| siR_160570 | 1. 5598  | 0. 7086  | -1. 13831769 | 0. 003056445 | ** |
| siR_160589 | 0. 01    | 1. 2307  | 6. 94333532  | 4. 86E-11    | ** |
| siR_160602 | 0. 01    | 1. 268   | 6. 98641094  | 2. 37E-11    | ** |
| siR_160608 | 1. 9497  | 1. 3426  | -0. 53822261 | 0. 081273721 |    |
| siR_160610 | 1. 4534  | 0. 4848  | -1. 58397021 | 0. 000237648 | ** |
| siR_160619 | 1. 4889  | 0. 634   | -1. 23169211 | 0. 002080356 | ** |
| siR_160636 | 9. 3942  | 3. 17    | -1. 56728747 | 6. 90E-21    | ** |
| siR_160645 | 1. 5598  | 0. 6713  | -1. 21633151 | 0. 00179751  | ** |
| siR_160669 | 1. 2407  | 0. 4102  | -1. 59675492 | 0. 000655154 | ** |
| siR_16069  | 3. 8995  | 2. 4987  | -0. 64211145 | 0. 003724692 |    |
| siR_160690 | 1. 028   | 0. 7086  | -0. 53679689 | 0. 21005998  |    |
| siR_160694 | 1. 8788  | 0. 4848  | -1. 95434989 | 1. 25E-06    | ** |
| siR_160698 | 1. 3116  | 1. 902   | 0. 53618944  | 0. 084510703 |    |
| siR_160705 | 1. 7016  | 2. 163   | 0. 34614173  | 0. 218923244 |    |
| siR_160706 | 0. 01    | 2. 6479  | 8. 04870483  | 6. 67E-23    | ** |
| siR_160719 | 0. 01    | 2. 2003  | 7. 78155643  | 3. 72E-19    | ** |
| siR_160737 | 0. 01    | 1. 4918  | 7. 22091032  | 3. 17E-13    | ** |

|            |          |          |             |             |    |
|------------|----------|----------|-------------|-------------|----|
| siR_160743 | 0.01     | 1.0069   | 6.6537766   | 3.63E-09    | ** |
| siR_160784 | 0.01     | 1.3799   | 7.10841991  | 2.74E-12    | ** |
| siR_160789 | 10.7768  | 4.2142   | -1.35459817 | 2.10E-19    | ** |
| siR_160791 | 3.2259   | 1.4172   | -1.18665835 | 9.48E-06    | ** |
| siR_160795 | 175.9381 | 66.2712  | -1.40861399 | 0.00E-01    | ** |
| siR_160799 | 1.5598   | 0.1865   | -3.06411352 | 1.15E-08    | ** |
| siR_160815 | 1.4889   | 0.4102   | -1.85984746 | 3.15E-05    | ** |
| siR_160831 | 0.01     | 9.5099   | 9.89328636  | 2.41E-80    | ** |
| siR_160834 | 0.01     | 1.9766   | 7.62687714  | 2.78E-17    | ** |
| siR_160855 | 1.2053   | 0.1119   | -3.42911034 | 1.49E-07    | ** |
| siR_160878 | 15.8461  | 6.2654   | -1.33864929 | 2.48E-27    | ** |
| siR_160879 | 7.5508   | 2.3122   | -1.70736331 | 4.17E-19    | ** |
| siR_160880 | 1.7016   | 0.5594   | -1.60493978 | 5.77E-05    | ** |
| siR_160881 | 9.7842   | 3.1327   | -1.64304728 | 4.15E-23    | ** |
| siR_160882 | 2.7651   | 1.3426   | -1.04230211 | 0.00022408  | ** |
| siR_160912 | 0.01     | 17.9756  | 10.81182421 | 3.30E-151   | ** |
| siR_160913 | 0.01     | 4.9974   | 8.96503389  | 1.43E-42    | ** |
| siR_160914 | 0.01     | 1.3799   | 7.10841991  | 2.74E-12    | ** |
| siR_160928 | 0.01     | 1.0442   | 6.70625425  | 1.77E-09    | ** |
| siR_160936 | 8.4371   | 4.065    | -1.05349185 | 6.60E-11    | ** |
| siR_160983 | 6.7355   | 4.7736   | -0.49670736 | 0.002445858 |    |
| siR_160985 | 16.8387  | 18.5723  | 0.14137173  | 0.126423878 |    |
| siR_160990 | 2.7296   | 1.8274   | -0.57889709 | 0.027229594 |    |
| siR_161    | 2.0561   | 1.6782   | -0.29299577 | 0.30933143  |    |
| siR_161003 | 1.2053   | 0.1865   | -2.69214474 | 2.94E-06    | ** |
| siR_16101  | 1.028    | 0.7832   | -0.39238759 | 0.347659208 |    |
| siR_161016 | 1.0635   | 0.2984   | -1.83350059 | 0.000528454 | ** |
| siR_161022 | 2.7651   | 1.6409   | -0.75284434 | 0.005049463 |    |
| siR_161031 | 1.0635   | 0.634    | -0.74626529 | 0.087380955 |    |
| siR_161045 | 353.4715 | 289.9225 | -0.2859266  | 1.91E-39    |    |
| siR_161054 | 0.01     | 7.1604   | 9.48389637  | 1.12E-60    | ** |
| siR_161066 | 1.418    | 0.4848   | -1.54839593 | 0.00035749  | ** |
| siR_161067 | 14.0736  | 10.0693  | -0.48302802 | 1.91E-05    |    |
| siR_161071 | 19.2493  | 10.4423  | -0.88236647 | 1.59E-17    |    |
| siR_161101 | 2.8714   | 1.6782   | -0.77483966 | 0.003387318 |    |
| siR_161128 | 3.7577   | 3.7294   | -0.01090635 | 0.958733578 |    |
| siR_161229 | 0.01     | 3.2073   | 8.32521549  | 1.38E-27    | ** |
| siR_161231 | 0.01     | 30.9539  | 11.59590548 | 7.57E-260   | ** |
| siR_161254 | 0.01     | 1.1188   | 6.80580835  | 4.20E-10    | ** |
| siR_161259 | 2.2688   | 1.0069   | -1.17200903 | 0.000243594 | ** |
| siR_161268 | 0.01     | 1.0069   | 6.6537766   | 3.63E-09    | ** |
| siR_161272 | 5.4238   | 2.4987   | -1.11812628 | 4.07E-08    | ** |
| siR_161335 | 20.8446  | 16.0737  | -0.37497163 | 3.83E-05    |    |
| siR_161369 | 1.5952   | 2.6106   | 0.71064411  | 0.009286607 |    |
| siR_161380 | 0.01     | 3.5056   | 8.45351758  | 4.40E-30    | ** |
| siR_161383 | 1.1344   | 0.3729   | -1.60506874 | 0.001091833 | ** |
| siR_161418 | 20.4192  | 14.8057  | -0.46377364 | 6.96E-07    |    |

|            |          |          |             |             |    |
|------------|----------|----------|-------------|-------------|----|
| siR_161422 | 189.6927 | 106.5486 | -0.83215252 | 4.47E-143   |    |
| siR_161426 | 8.508    | 6.3773   | -0.41587428 | 0.003813285 |    |
| siR_161431 | 24.3187  | 26.9635  | 0.14894167  | 0.052685581 |    |
| siR_161434 | 12.1593  | 10.5542  | -0.20424295 | 0.07786188  |    |
| siR_161468 | 0.01     | 1.1188   | 6.80580835  | 4.20E-10    | ** |
| siR_161471 | 6.6291   | 7.0485   | 0.08850325  | 0.551467797 |    |
| siR_161479 | 0.01     | 2.163    | 7.75688986  | 7.63E-19    | ** |
| siR_161494 | 4.5376   | 1.6409   | -1.46744212 | 5.86E-10    | ** |
| siR_161504 | 1.8434   | 1.0815   | -0.76933549 | 0.020030177 |    |
| siR_161509 | 1.3471   | 0.2611   | -2.36718259 | 4.10E-06    | ** |
| siR_161516 | 0.01     | 1.9766   | 7.62687714  | 2.78E-17    | ** |
| siR_161538 | 6.7      | 1.1188   | -2.58220894 | 6.80E-28    | ** |
| siR_161544 | 4.1831   | 1.0069   | -2.05465208 | 5.57E-14    | ** |
| siR_161565 | 2.1624   | 1.2307   | -0.81315429 | 0.008149142 |    |
| siR_161579 | 133.0791 | 70.7092  | -0.91231417 | 1.14E-117   |    |
| siR_161580 | 2.4106   | 1.3426   | -0.84436273 | 0.003887492 |    |
| siR_161594 | 2.7296   | 1.5663   | -0.80132899 | 0.003281986 |    |
| siR_161596 | 103.1948 | 71.9399  | -0.52050622 | 2.44E-35    |    |
| siR_161597 | 4.0767   | 2.4987   | -0.7062241  | 0.0012543   |    |
| siR_161602 | 0.01     | 1.902    | 7.57137344  | 1.17E-16    | ** |
| siR_161640 | 2.8714   | 1.4918   | -0.94470019 | 0.000524188 |    |
| siR_161697 | 1.2762   | 0.5967   | -1.09677676 | 0.009487354 | ** |
| siR_16172  | 1.3471   | 0.634    | -1.08730221 | 0.008088456 | ** |
| siR_16175  | 2.4815   | 1.2307   | -1.01173333 | 0.000651819 | ** |
| siR_161782 | 0.01     | 5.1093   | 8.99698184  | 1.66E-43    | ** |
| siR_161829 | 5.991    | 4.3261   | -0.46972982 | 0.006639605 |    |
| siR_161831 | 1.8788   | 1.902    | 0.01770575  | 0.94789233  |    |
| siR_161833 | 0.01     | 4.699    | 8.87620996  | 4.51E-40    | ** |
| siR_161861 | 0.01     | 2.6106   | 8.02823761  | 1.37E-22    | ** |
| siR_161862 | 0.01     | 1.1561   | 6.85312238  | 2.05E-10    | ** |
| siR_16191  | 5.9556   | 2.8343   | -1.07125439 | 2.75E-08    | ** |
| siR_161925 | 0.01     | 1.1188   | 6.80580835  | 4.20E-10    | ** |
| siR_161938 | 6.7709   | 8.6895   | 0.35992555  | 0.010431167 |    |
| siR_161939 | 2.6587   | 1.902    | -0.48320375 | 0.064406625 |    |
| siR_161941 | 31.9404  | 20.0268  | -0.67345046 | 3.58E-18    |    |
| siR_161942 | 13.6128  | 11.6357  | -0.22640584 | 0.03935175  |    |
| siR_161963 | 1.3471   | 1.7528   | 0.37980444  | 0.227796939 |    |
| siR_161964 | 199.3705 | 194.0027 | -0.03937523 | 0.156002373 |    |
| siR_161965 | 3.7577   | 2.3495   | -0.67749612 | 0.0028337   |    |
| siR_161969 | 2.4106   | 1.3053   | -0.88501086 | 0.002658959 |    |
| siR_162012 | 0.01     | 4.2142   | 8.71911497  | 5.16E-36    | ** |
| siR_162030 | 1.0635   | 0.2611   | -2.02614567 | 0.000213675 | ** |
| siR_162038 | 3.1905   | 2.9462   | -0.11492716 | 0.608187872 |    |
| siR_162040 | 3.4741   | 2.0139   | -0.78664723 | 0.001080173 |    |
| siR_162049 | 1.9852   | 0.5594   | -1.8273322  | 1.89E-06    | ** |
| siR_16208  | 0.01     | 1.6409   | 7.35834351  | 1.79E-14    | ** |
| siR_162086 | 297.7442 | 133.6612 | -1.15549267 | 0           | ** |

|            |         |         |             |             |    |
|------------|---------|---------|-------------|-------------|----|
| siR_162092 | 4.8566  | 1.7155  | -1.50131754 | 7.06E-11    | ** |
| siR_162094 | 1.418   | 0.3356  | -2.07904291 | 1.26E-05    | ** |
| siR_162097 | 1.5952  | 0.5967  | -1.41865963 | 0.000378908 | ** |
| siR_162157 | 0.01    | 2.5733  | 8.00747585  | 2.81E-22    | ** |
| siR_162165 | 0.01    | 1.9766  | 7.62687714  | 2.78E-17    | ** |
| siR_162251 | 3.4386  | 1.6782  | -1.03490664 | 4.20E-05    | ** |
| siR_162265 | 0.01    | 1.3426  | 7.06888574  | 5.63E-12    | ** |
| siR_162266 | 0.01    | 1.4918  | 7.22091032  | 3.17E-13    | ** |
| siR_162276 | 0.01    | 1.7901  | 7.48389637  | 1.01E-15    | ** |
| siR_162282 | 2.5524  | 2.0885  | -0.2893873  | 0.262051286 |    |
| siR_162293 | 3.3677  | 2.4987  | -0.43058593 | 0.060904434 |    |
| siR_162310 | 3.2968  | 1.3053  | -1.33668495 | 8.97E-07    | ** |
| siR_162314 | 0.01    | 1.9766  | 7.62687714  | 2.78E-17    | ** |
| siR_162351 | 0.01    | 3.6175  | 8.49884921  | 5.10E-31    | ** |
| siR_162355 | 0.01    | 1.8274  | 7.51364865  | 4.92E-16    | ** |
| siR_162358 | 0.01    | 1.1188  | 6.80580835  | 4.20E-10    | ** |
| siR_162370 | 1.1344  | 1.6409  | 0.53255788  | 0.111471941 |    |
| siR_162376 | 1.3116  | 1.1561  | -0.18206161 | 0.609564212 |    |
| siR_162381 | 3.1196  | 1.3053  | -1.25697963 | 5.22E-06    | ** |
| siR_162391 | 0.01    | 1.5663  | 7.29121675  | 7.54E-14    | ** |
| siR_162394 | 0.01    | 1.3053  | 7.02823761  | 1.15E-11    | ** |
| siR_162443 | 0.01    | 1.8274  | 7.51364865  | 4.92E-16    | ** |
| siR_162448 | 13.8609 | 5.1093  | -1.43982338 | 9.85E-27    | ** |
| siR_162451 | 8.508   | 3.5429  | -1.26388929 | 3.37E-14    | ** |
| siR_162463 | 8.4016  | 45.3493 | 2.43234428  | 8.04E-170   | ** |
| siR_162466 | 0.01    | 24.614  | 11.26526341 | 8.91E-207   | ** |
| siR_162484 | 0.01    | 14.209  | 10.47258931 | 1.12E-119   | ** |
| siR_162487 | 5.9556  | 4.1769  | -0.51181426 | 0.003421003 |    |
| siR_162499 | 2.1979  | 1.6782  | -0.38921109 | 0.169285493 |    |
| siR_162505 | 0.6026  | 1.2307  | 1.03020655  | 0.014842901 | *  |
| siR_162510 | 2.1624  | 1.6036  | -0.43131909 | 0.13364624  |    |
| siR_162512 | 0.01    | 2.9835  | 8.22086197  | 1.03E-25    | ** |
| siR_162513 | 3.3677  | 4.4007  | 0.3859694   | 0.051873908 |    |
| siR_162514 | 1.3825  | 0.7832  | -0.81982681 | 0.03388769  |    |
| siR_162539 | 0.01    | 3.6548  | 8.51364865  | 2.48E-31    | ** |
| siR_162556 | 0.01    | 2.4241  | 7.9213054   | 4.98E-21    | ** |
| siR_162567 | 0.01    | 1.0442  | 6.70625425  | 1.77E-09    | ** |
| siR_16257  | 12.6556 | 6.5264  | -0.95541659 | 1.55E-13    |    |
| siR_162607 | 0.01    | 6.601   | 9.36654079  | 5.41E-56    | ** |
| siR_162608 | 0.01    | 2.7597  | 8.10836763  | 7.72E-24    | ** |
| siR_162617 | 64.7316 | 58.0665 | -0.15676409 | 0.001617887 |    |
| siR_162618 | 1.5598  | 1.7528  | 0.16830033  | 0.577980336 |    |
| siR_162619 | 1.2053  | 0.7832  | -0.62193961 | 0.120458422 |    |
| siR_162623 | 16.2361 | 17.7519 | 0.12876831  | 0.172550607 |    |
| siR_16264  | 2.1979  | 1.2307  | -0.83664662 | 0.006267341 |    |
| siR_162644 | 0.01    | 5.0347  | 8.97576201  | 6.99E-43    | ** |
| siR_162650 | 0.01    | 1.6782  | 7.39077085  | 8.72E-15    | ** |

|            |         |         |             |             |    |
|------------|---------|---------|-------------|-------------|----|
| siR_162653 | 0.01    | 1.3053  | 7.02823761  | 1.15E-11    | ** |
| siR_162669 | 0.01    | 1.2307  | 6.94333532  | 4.86E-11    | ** |
| siR_162684 | 0.01    | 2.4987  | 7.96503389  | 1.18E-21    | ** |
| siR_162692 | 2.5878  | 2.4241  | -0.09427691 | 0.704679575 |    |
| siR_162719 | 0.01    | 1.7528  | 7.45351758  | 2.07E-15    | ** |
| siR_162728 | 1.8434  | 2.0139  | 0.12762289  | 0.648346419 |    |
| siR_162749 | 2.0206  | 1.268   | -0.67222901 | 0.030308462 |    |
| siR_162756 | 0.9217  | 1.5663  | 0.76499141  | 0.032107154 |    |
| siR_162783 | 0.01    | 15.104  | 10.56071495 | 3.60E-127   | ** |
| siR_162784 | 0.01    | 6.4518  | 9.33355791  | 9.59E-55    | ** |
| siR_162789 | 0.01    | 20.8846 | 11.0282238  | 1.47E-175   | ** |
| siR_162790 | 0.01    | 2.2376  | 7.80580835  | 1.81E-19    | ** |
| siR_16281  | 4.5376  | 2.0139  | -1.17193739 | 1.90E-07    | ** |
| siR_162837 | 0.6381  | 1.0442  | 0.71054362  | 0.101902462 |    |
| siR_162842 | 0.01    | 1.0069  | 6.6537766   | 3.63E-09    | ** |
| siR_162898 | 0.9217  | 1.4545  | 0.65815414  | 0.070371585 |    |
| siR_162950 | 6.8418  | 2.8716  | -1.25252113 | 1.49E-11    | ** |
| siR_162953 | 1.5952  | 1.7901  | 0.16630287  | 0.578469221 |    |
| siR_162970 | 6.8773  | 4.3634  | -0.65638955 | 8.32E-05    |    |
| siR_162981 | 1.6661  | 1.7155  | 0.04215413  | 0.88597889  |    |
| siR_163022 | 2.1624  | 0.4848  | -2.15717181 | 2.88E-08    | ** |
| siR_163035 | 0.01    | 6.601   | 9.36654079  | 5.41E-56    | ** |
| siR_163080 | 1.7725  | 1.268   | -0.48323088 | 0.132259137 |    |
| siR_163093 | 5.5302  | 2.4241  | -1.18988244 | 5.75E-09    | ** |
| siR_163112 | 0.01    | 1.0069  | 6.6537766   | 3.63E-09    | ** |
| siR_163142 | 2.9778  | 1.6782  | -0.8273322  | 0.001590907 |    |
| siR_163143 | 5.3175  | 3.0954  | -0.78062228 | 5.72E-05    |    |
| siR_16315  | 0.01    | 1.4918  | 7.22091032  | 3.17E-13    | ** |
| siR_163191 | 1.6661  | 0.1865  | -3.15922746 | 2.08E-09    | ** |
| siR_163196 | 14.9953 | 22.4509 | 0.58226289  | 1.43E-10    |    |
| siR_16325  | 0.01    | 1.3053  | 7.02823761  | 1.15E-11    | ** |
| siR_163265 | 0.01    | 26.9262 | 11.39479493 | 3.93E-226   | ** |
| siR_163278 | 0.8508  | 1.1934  | 0.48818574  | 0.210653598 |    |
| siR_163287 | 10.3868 | 4.2515  | -1.28870741 | 1.74E-17    | ** |
| siR_163307 | 2.6942  | 1.7155  | -0.65122783 | 0.014824002 |    |
| siR_163323 | 11.344  | 3.6921  | -1.6194159  | 4.93E-26    | ** |
| siR_163328 | 0.01    | 1.1934  | 6.89893387  | 9.98E-11    | ** |
| siR_163334 | 3.5095  | 1.4918  | -1.23421137 | 1.87E-06    | ** |
| siR_163336 | 1.028   | 0.4848  | -1.08437866 | 0.021479092 | *  |
| siR_163360 | 0.01    | 7.6079  | 9.57135447  | 2.01E-64    | ** |
| siR_163363 | 0.01    | 15.2532 | 10.57489623 | 2.03E-128   | ** |
| siR_163369 | 0.01    | 5.1466  | 9.00747585  | 8.09E-44    | ** |
| siR_163375 | 0.01    | 2.4614  | 7.94333532  | 2.43E-21    | ** |
| siR_163382 | 2.5524  | 0.9323  | -1.45298827 | 4.29E-06    | ** |
| siR_163386 | 0.01    | 1.6409  | 7.35834351  | 1.79E-14    | ** |
| siR_163397 | 1.5598  | 0.2611  | -2.57868669 | 1.81E-07    | ** |
| siR_163408 | 1.5952  | 1.2307  | -0.37425819 | 0.260282941 |    |

|            |          |          |              |              |    |
|------------|----------|----------|--------------|--------------|----|
| siR_163424 | 0. 01    | 3. 2446  | 8. 34189682  | 6. 75E-28    | ** |
| siR_163434 | 2. 127   | 0. 4848  | -2. 13335843 | 4. 66E-08    | ** |
| siR_163435 | 3. 864   | 1. 8647  | -1. 05115155 | 1. 08E-05    | ** |
| siR_163448 | 0. 01    | 39. 4569 | 11. 9460619  | 0            | ** |
| siR_16346  | 1. 2407  | 0. 6713  | -0. 88612477 | 0. 0320329   |    |
| siR_163471 | 4. 1831  | 5. 8924  | 0. 49428288  | 0. 00467578  |    |
| siR_163495 | 42. 2918 | 47. 1767 | 0. 15769654  | 0. 006742681 |    |
| siR_163510 | 1. 5243  | 2. 2003  | 0. 52955337  | 0. 066370921 |    |
| siR_163537 | 0. 709   | 1. 2307  | 0. 7956216   | 0. 049842987 |    |
| siR_163543 | 1. 5598  | 1. 7528  | 0. 16830033  | 0. 577980336 |    |
| siR_163553 | 2. 1624  | 0. 7086  | -1. 60959005 | 5. 25E-06    | ** |
| siR_163565 | 2. 0206  | 0. 4102  | -2. 30038436 | 2. 46E-08    | ** |
| siR_163571 | 2. 2688  | 1. 1188  | -1. 01997728 | 0. 001040485 | ** |
| siR_163698 | 0. 01    | 1. 7528  | 7. 45351758  | 2. 07E-15    | ** |
| siR_163700 | 0. 01    | 3. 431   | 8. 42248532  | 1. 85E-29    | ** |
| siR_163707 | 0. 01    | 3. 6548  | 8. 51364865  | 2. 48E-31    | ** |
| siR_163735 | 0. 01    | 16. 6331 | 10. 69984136 | 5. 71E-140   | ** |
| siR_163736 | 0. 01    | 1. 6782  | 7. 39077085  | 8. 72E-15    | ** |
| siR_163737 | 0. 01    | 1. 529   | 7. 2564446   | 1. 55E-13    | ** |
| siR_163744 | 0. 01    | 1. 0442  | 6. 70625425  | 1. 77E-09    | ** |
| siR_163752 | 0. 01    | 1. 6782  | 7. 39077085  | 8. 72E-15    | ** |
| siR_163757 | 0. 01    | 1. 7901  | 7. 48389637  | 1. 01E-15    | ** |
| siR_163771 | 12. 1593 | 5. 333   | -1. 18904094 | 5. 33E-18    | ** |
| siR_163773 | 0. 01    | 2. 4614  | 7. 94333532  | 2. 43E-21    | ** |
| siR_163794 | 5. 8138  | 2. 6479  | -1. 1346328  | 8. 91E-09    | ** |
| siR_163802 | 3. 155   | 1. 5663  | -1. 01027944 | 0. 000120538 | ** |
| siR_163822 | 2. 9423  | 1. 2307  | -1. 25746522 | 9. 68E-06    | ** |
| siR_163836 | 1. 2407  | 0. 1865  | -2. 73390678 | 1. 71E-06    | ** |
| siR_163855 | 1. 0989  | 0. 4102  | -1. 42166071 | 0. 003288611 | ** |
| siR_163863 | 1. 1344  | 0. 4848  | -1. 22646783 | 0. 007625228 | ** |
| siR_163892 | 1. 0989  | 0. 5594  | -0. 97410795 | 0. 02925074  |    |
| siR_163899 | 2. 5524  | 1. 2307  | -1. 05237531 | 0. 000354975 | ** |
| siR_163903 | 0. 01    | 1. 529   | 7. 2564446   | 1. 55E-13    | ** |
| siR_163904 | 1. 0989  | 0. 2984  | -1. 88074067 | 0. 000335467 | ** |
| siR_163918 | 0. 01    | 3. 0581  | 8. 25649177  | 2. 46E-26    | ** |
| siR_16392  | 0. 01    | 1. 6036  | 7. 32517051  | 3. 67E-14    | ** |
| siR_163920 | 0. 01    | 1. 0442  | 6. 70625425  | 1. 77E-09    | ** |
| siR_163923 | 15. 8461 | 21. 7423 | 0. 45637675  | 4. 31E-07    |    |
| siR_163925 | 10. 6704 | 6. 4145  | -0. 73420554 | 6. 19E-08    |    |
| siR_163928 | 36. 159  | 34. 9816 | -0. 0477585  | 0. 464854285 |    |
| siR_163978 | 0. 01    | 4. 3634  | 8. 76930892  | 2. 91E-37    | ** |
| siR_163982 | 0. 01    | 31. 0658 | 11. 60111149 | 8. 76E-261   | ** |
| siR_1640   | 1. 0635  | 0. 1119  | -3. 24853809 | 1. 55E-06    | ** |
| siR_164015 | 1. 6307  | 1. 529   | -0. 09290299 | 0. 768586776 |    |
| siR_164017 | 0. 01    | 3. 9159  | 8. 61320011  | 1. 62E-33    | ** |
| siR_164028 | 0. 01    | 3. 2446  | 8. 34189682  | 6. 75E-28    | ** |
| siR_164031 | 0. 01    | 25. 8819 | 11. 33772781 | 2. 17E-217   | ** |



|            |          |          |             |             |    |
|------------|----------|----------|-------------|-------------|----|
| siR_16404  | 0.01     | 2.3495   | 7.87620996  | 2.10E-20    | ** |
| siR_16407  | 0.01     | 1.1561   | 6.85312238  | 2.05E-10    | ** |
| siR_164115 | 1.8788   | 0.3729   | -2.3329508  | 6.03E-08    | ** |
| siR_164121 | 3.4386   | 1.6782   | -1.03490664 | 4.20E-05    | ** |
| siR_164127 | 1.028    | 0.0746   | -3.78452082 | 4.98E-07    | ** |
| siR_164138 | 66.256   | 21.2575  | -1.64007917 | 1.77E-146   | ** |
| siR_164141 | 2.3397   | 0.9323   | -1.32745738 | 4.00E-05    | ** |
| siR_164145 | 1.6307   | 1.1188   | -0.54353923 | 0.108335711 |    |
| siR_164153 | 1.0635   | 0.5594   | -0.92686787 | 0.039728581 |    |
| siR_164160 | 0.8508   | 1.1188   | 0.39506022  | 0.318611873 |    |
| siR_164165 | 3.1196   | 4.065    | 0.3818943   | 0.064298174 |    |
| siR_164171 | 0.01     | 1.529    | 7.2564446   | 1.55E-13    | ** |
| siR_164189 | 0.01     | 1.4545   | 7.18437949  | 6.51E-13    | ** |
| siR_164223 | 2.3751   | 2.3122   | -0.03872206 | 0.881756406 |    |
| siR_164234 | 2.5878   | 3.6175   | 0.48326689  | 0.0300817   |    |
| siR_164248 | 0.01     | 281.7552 | 14.78215462 | 0           | ** |
| siR_164249 | 0.01     | 3.6175   | 8.49884921  | 5.10E-31    | ** |
| siR_1643   | 3.4032   | 1.1934   | -1.51181426 | 4.34E-08    | ** |
| siR_164300 | 2.0915   | 1.3426   | -0.63950845 | 0.034937772 |    |
| siR_164367 | 1.9143   | 3.2073   | 0.74454237  | 0.002651844 |    |
| siR_164392 | 0.01     | 1.0442   | 6.70625425  | 1.77E-09    | ** |
| siR_164401 | 1.9852   | 0.7086   | -1.48624099 | 3.88E-05    | ** |
| siR_164411 | 1.0989   | 0.3356   | -1.71124549 | 0.000775199 | ** |
| siR_164422 | 1.7016   | 0.634    | -1.42433719 | 0.000229134 | ** |
| siR_164449 | 0.01     | 2.8343   | 8.14684866  | 1.83E-24    | ** |
| siR_164452 | 0.01     | 1.4172   | 7.14689956  | 1.34E-12    | ** |
| siR_164481 | 0.01     | 1.6782   | 7.39077085  | 8.72E-15    | ** |
| siR_164489 | 4.0767   | 6.1162   | 0.58523379  | 0.000783237 |    |
| siR_164493 | 2.9423   | 1.3053   | -1.17256293 | 2.82E-05    | ** |
| siR_1645   | 143.1469 | 84.5079  | -0.76033831 | 4.09E-93    |    |
| siR_164559 | 2.2333   | 0.9323   | -1.26031089 | 0.00011631  | ** |
| siR_164613 | 0.01     | 3.7294   | 8.54279973  | 5.90E-32    | ** |
| siR_164617 | 0.01     | 6.3773   | 9.31680194  | 4.04E-54    | ** |
| siR_164625 | 5.1757   | 4.3634   | -0.24630126 | 0.169361366 |    |
| siR_164655 | 1.6307   | 0.2984   | -2.45017195 | 2.15E-07    | ** |
| siR_164749 | 0.01     | 1.2307   | 6.94333532  | 4.86E-11    | ** |
| siR_164772 | 0.01     | 1.1561   | 6.85312238  | 2.05E-10    | ** |
| siR_164783 | 1.418    | 0.7086   | -1.00081416 | 0.011050653 | *  |
| siR_164787 | 56.5427  | 17.5281  | -1.68967116 | 1.25E-130   | ** |
| siR_164801 | 1.1344   | 0.9323   | -0.28306327 | 0.468279224 |    |
| siR_164804 | 4.1831   | 2.2749   | -0.87876936 | 7.95E-05    |    |
| siR_164813 | 1.1344   | 1.0069   | -0.17200903 | 0.654222799 |    |
| siR_164816 | 2.4106   | 1.9393   | -0.31385628 | 0.239317058 |    |
| siR_164850 | 2.5169   | 4.9974   | 0.9895298   | 1.71E-06    |    |
| siR_164852 | 0.01     | 1.6036   | 7.32517051  | 3.67E-14    | ** |
| siR_164863 | 0.01     | 1.4918   | 7.22091032  | 3.17E-13    | ** |
| siR_164864 | 1.3471   | 1.1188   | -0.26790479 | 0.452103943 |    |

|            |          |          |             |             |    |
|------------|----------|----------|-------------|-------------|----|
| siR_164869 | 1.3471   | 0.3729   | -1.85299625 | 8.02E-05    | ** |
| siR_164884 | 118.6864 | 47.5124  | -1.32077864 | 1.58E-189   | ** |
| siR_164893 | 8.2244   | 1.529    | -2.42732203 | 1.09E-31    | ** |
| siR_164895 | 1.4889   | 0.6713   | -1.14921731 | 0.003563263 | ** |
| siR_164936 | 397.0395 | 190.6089 | -1.05866706 | 0           | ** |
| siR_164937 | 1.028    | 0.4102   | -1.32544087 | 0.007079856 | ** |
| siR_164968 | 0.01     | 2.7225   | 8.08878824  | 1.58E-23    | ** |
| siR_164971 | 0.01     | 1.7528   | 7.45351758  | 2.07E-15    | ** |
| siR_164994 | 8.2598   | 5.9297   | -0.47814773 | 0.001187064 |    |
| siR_165015 | 0.01     | 8.8759   | 9.7937496   | 4.90E-75    | ** |
| siR_165025 | 25.1695  | 16.3347  | -0.6237366  | 5.72E-13    |    |
| siR_16503  | 0.01     | 1.1934   | 6.89893387  | 9.98E-11    | ** |
| siR_165080 | 1.1344   | 1.0069   | -0.17200903 | 0.654222799 |    |
| siR_165081 | 0.01     | 2.163    | 7.75688986  | 7.63E-19    | ** |
| siR_165111 | 0.7444   | 2.2376   | 1.5878022   | 3.90E-06    | ** |
| siR_165112 | 0.01     | 3.2446   | 8.34189682  | 6.75E-28    | ** |
| siR_165117 | 0.01     | 1.4918   | 7.22091032  | 3.17E-13    | ** |
| siR_16514  | 3.4741   | 1.902    | -0.86912204 | 0.000371298 |    |
| siR_165157 | 2.0915   | 1.6409   | -0.35005068 | 0.224899271 |    |
| siR_165159 | 1.3116   | 1.7528   | 0.41833358  | 0.187156922 |    |
| siR_165164 | 1.2762   | 0.2984   | -2.096535   | 3.20E-05    | ** |
| siR_165165 | 1.5243   | 0.8951   | -0.7680261  | 0.035009169 |    |
| siR_165166 | 1.028    | 0.7086   | -0.53679689 | 0.21005998  |    |
| siR_165167 | 1.3825   | 1.0442   | -0.40488142 | 0.260207089 |    |
| siR_165180 | 2.1979   | 1.4172   | -0.63308238 | 0.032076259 |    |
| siR_165182 | 1.737    | 0.8951   | -0.95647698 | 0.006626331 |    |
| siR_165221 | 1.5243   | 0.7086   | -1.1051035  | 0.004253135 | ** |
| siR_165241 | 0.01     | 1.4172   | 7.14689956  | 1.34E-12    | ** |
| siR_165250 | 0.01     | 24.8004  | 11.27614767 | 2.45E-208   | ** |
| siR_165251 | 0.01     | 6.1908   | 9.27398204  | 1.47E-52    | ** |
| siR_165252 | 0.01     | 1.3426   | 7.06888574  | 5.63E-12    | ** |
| siR_165258 | 0.01     | 7.1604   | 9.48389637  | 1.12E-60    | ** |
| siR_165259 | 0.01     | 1.1934   | 6.89893387  | 9.98E-11    | ** |
| siR_165276 | 0.7799   | 2.2003   | 1.49633919  | 1.17E-05    | ** |
| siR_165358 | 7.3027   | 11.1136  | 0.60582435  | 2.96E-06    |    |
| siR_165364 | 2.0915   | 0.4102   | -2.3501386  | 9.01E-09    | ** |
| siR_165374 | 4.6439   | 6.0789   | 0.38847338  | 0.021454226 |    |
| siR_165402 | 0.01     | 9.1743   | 9.84145427  | 1.56E-77    | ** |
| siR_165405 | 0.01     | 2.0512   | 7.68032436  | 6.59E-18    | ** |
| siR_165409 | 0.01     | 1.6036   | 7.32517051  | 3.67E-14    | ** |
| siR_16541  | 0.01     | 1.7528   | 7.45351758  | 2.07E-15    | ** |
| siR_165410 | 0.01     | 4.1396   | 8.69334756  | 2.17E-35    | ** |
| siR_165461 | 12.4429  | 9.9202   | -0.32688165 | 0.005192411 |    |
| siR_165463 | 1.0989   | 0.4475   | -1.29610052 | 0.006143403 | ** |
| siR_165471 | 0.01     | 193.0331 | 14.23656063 | 0           | ** |
| siR_165472 | 0.01     | 7.5707   | 9.56428289  | 4.13E-64    | ** |
| siR_165478 | 0.01     | 27.0008  | 11.39878644 | 9.34E-227   | ** |

|            |         |          |             |             |    |
|------------|---------|----------|-------------|-------------|----|
| siR_165486 | 0.01    | 10.4796  | 10.03336794 | 1.85E-88    | ** |
| siR_16550  | 1.028   | 0.2984   | -1.78452082 | 0.000827671 | ** |
| siR_165551 | 1.0635  | 0.4848   | -1.13335843 | 0.015328041 | *  |
| siR_165556 | 1.737   | 1.3053   | -0.41221633 | 0.198218358 |    |
| siR_165559 | 0.01    | 1.8647   | 7.54279973  | 2.40E-16    | ** |
| siR_16556  | 0.01    | 1.0815   | 6.75688986  | 8.62E-10    | ** |
| siR_165561 | 0.01    | 16.4093  | 10.68029798 | 4.26E-138   | ** |
| siR_165565 | 0.01    | 3.2446   | 8.34189682  | 6.75E-28    | ** |
| siR_165577 | 1.2407  | 0.8951   | -0.47103354 | 0.220381215 |    |
| siR_165580 | 3.6868  | 1.0069   | -1.87244875 | 3.28E-11    | ** |
| siR_165592 | 1.3825  | 0.0746   | -4.21196004 | 1.07E-09    | ** |
| siR_165599 | 7.6926  | 4.699    | -0.71111753 | 7.93E-06    |    |
| siR_165617 | 5.0339  | 3.2446   | -0.63363593 | 0.00111392  |    |
| siR_165653 | 2.0561  | 0.6713   | -1.61488089 | 8.60E-06    | ** |
| siR_165660 | 0.01    | 1.8274   | 7.51364865  | 4.92E-16    | ** |
| siR_165673 | 0.01    | 1.529    | 7.2564446   | 1.55E-13    | ** |
| siR_165676 | 0.01    | 3.7667   | 8.55715732  | 2.87E-32    | ** |
| siR_165678 | 0.01    | 9.9948   | 9.96503389  | 2.11E-84    | ** |
| siR_165686 | 0.01    | 198.5152 | 14.27696186 | 0           | ** |
| siR_165687 | 0.01    | 1.1561   | 6.85312238  | 2.05E-10    | ** |
| siR_165694 | 86.4624 | 31.6625  | -1.44929771 | 2.63E-159   | ** |
| siR_165704 | 1.028   | 0.6713   | -0.61481072 | 0.156712209 |    |
| siR_165753 | 1.2407  | 0.5967   | -1.05607663 | 0.013149564 | *  |
| siR_165760 | 2.0561  | 1.7901   | -0.19987025 | 0.481393777 |    |
| siR_165789 | 1.028   | 0.3356   | -1.61502564 | 0.001825058 | ** |
| siR_165801 | 0.01    | 1.9393   | 7.59939219  | 5.69E-17    | ** |
| siR_165808 | 2.3751  | 1.4918   | -0.67093413 | 0.018909397 |    |
| siR_165814 | 1.6307  | 0.2611   | -2.64281703 | 6.26E-08    | ** |
| siR_165831 | 19.0721 | 10.405   | -0.87418674 | 3.94E-17    |    |
| siR_165842 | 22.7589 | 15.5515  | -0.54937709 | 9.68E-10    |    |
| siR_165846 | 3.155   | 2.1258   | -0.56963413 | 0.01918796  |    |
| siR_165862 | 0.01    | 1.8647   | 7.54279973  | 2.40E-16    | ** |
| siR_165870 | 0.01    | 1.0069   | 6.6537766   | 3.63E-09    | ** |
| siR_165900 | 1.028   | 0.8951   | -0.19971949 | 0.622135026 |    |
| siR_165903 | 0.01    | 4.5871   | 8.84143855  | 3.90E-39    | ** |
| siR_165947 | 1.2407  | 1.268    | 0.03140043  | 0.925522201 |    |
| siR_165949 | 6.7709  | 4.1023   | -0.72291461 | 2.13E-05    |    |
| siR_165958 | 16.2361 | 15.4397  | -0.07256041 | 0.459115656 |    |
| siR_165971 | 0.01    | 4.5871   | 8.84143855  | 3.90E-39    | ** |
| siR_165999 | 0.01    | 25.3971  | 11.31044806 | 2.48E-213   | ** |
| siR_166098 | 1.9143  | 0.3356   | -2.51200232 | 1.12E-08    | ** |
| siR_166145 | 12.8329 | 21.1829  | 0.72305288  | 4.36E-14    |    |
| siR_166158 | 1.9497  | 0.7459   | -1.38619802 | 0.000108984 | ** |
| siR_166181 | 8.2953  | 2.6479   | -1.64744552 | 6.84E-20    | ** |
| siR_166194 | 8.1535  | 7.4215   | -0.13570868 | 0.332245713 |    |
| siR_166211 | 1.1344  | 1.268    | 0.16062531  | 0.651027006 |    |
| siR_166216 | 0.01    | 1.0442   | 6.70625425  | 1.77E-09    | ** |

|            |         |         |             |             |    |
|------------|---------|---------|-------------|-------------|----|
| siR_166220 | 0.01    | 13.7241 | 10.42249583 | 1.28E-115   | ** |
| siR_166225 | 0.01    | 4.6244  | 8.85312238  | 1.90E-39    | ** |
| siR_166229 | 0.01    | 9.5472  | 9.89893387  | 1.18E-80    | ** |
| siR_166230 | 0.01    | 1.0815  | 6.75688986  | 8.62E-10    | ** |
| siR_166248 | 0.01    | 2.4614  | 7.94333532  | 2.43E-21    | ** |
| siR_166249 | 0.01    | 1.1934  | 6.89893387  | 9.98E-11    | ** |
| siR_166250 | 0.01    | 1.1561  | 6.85312238  | 2.05E-10    | ** |
| siR_166255 | 0.01    | 31.1031 | 11.60284266 | 4.27E-261   | ** |
| siR_166256 | 0.01    | 7.235   | 9.49884921  | 2.67E-61    | ** |
| siR_166257 | 0.01    | 1.0069  | 6.6537766   | 3.63E-09    | ** |
| siR_166270 | 0.01    | 17.4162 | 10.76621416 | 1.59E-146   | ** |
| siR_166279 | 0.01    | 1.0442  | 6.70625425  | 1.77E-09    | ** |
| siR_166288 | 0.01    | 4.5499  | 8.82969103  | 8.00E-39    | ** |
| siR_166290 | 1.4534  | 1.4172  | -0.03638844 | 0.914255543 |    |
| siR_166291 | 0.01    | 1.4172  | 7.14689956  | 1.34E-12    | ** |
| siR_166303 | 0.01    | 7.0112  | 9.45351758  | 1.99E-59    | ** |
| siR_166304 | 0.01    | 1.0442  | 6.70625425  | 1.77E-09    | ** |
| siR_166313 | 0.01    | 1.0442  | 6.70625425  | 1.77E-09    | ** |
| siR_166326 | 0.01    | 2.2376  | 7.80580835  | 1.81E-19    | ** |
| siR_166329 | 1.5952  | 1.9766  | 0.30928363  | 0.290705553 |    |
| siR_166331 | 0.01    | 5.6314  | 9.13734982  | 7.07E-48    | ** |
| siR_166334 | 3.8286  | 1.8647  | -1.0378734  | 1.46E-05    | ** |
| siR_166395 | 0.01    | 3.9904  | 8.64038956  | 3.85E-34    | ** |
| siR_166420 | 5.5656  | 5.4449  | -0.03163167 | 0.850502133 |    |
| siR_166423 | 11.4149 | 10.7779 | -0.08284211 | 0.479642071 |    |
| siR_166428 | 7.9762  | 5.7433  | -0.47382166 | 0.001581685 |    |
| siR_166475 | 1.3825  | 0.7459  | -0.89022535 | 0.022894115 |    |
| siR_166483 | 16.4842 | 6.7875  | -1.28013167 | 1.38E-26    | ** |
| siR_166492 | 1.1344  | 0.7832  | -0.53447677 | 0.189070882 |    |
| siR_166506 | 3.7931  | 2.797   | -0.43949715 | 0.042551057 |    |
| siR_166512 | 1.3471  | 0.7086  | -0.92681358 | 0.020219118 |    |
| siR_166520 | 0.01    | 2.2376  | 7.80580835  | 1.81E-19    | ** |
| siR_166523 | 1.2762  | 0.6713  | -0.92682489 | 0.023898405 |    |
| siR_166525 | 6.9482  | 3.7667  | -0.88333815 | 3.12E-07    |    |
| siR_166526 | 1.028   | 0.6713  | -0.61481072 | 0.156712209 |    |
| siR_166532 | 0.01    | 6.4891  | 9.34187459  | 4.67E-55    | ** |
| siR_166533 | 0.01    | 1.7528  | 7.45351758  | 2.07E-15    | ** |
| siR_166536 | 0.01    | 23.9427 | 11.22537014 | 3.71E-201   | ** |
| siR_166537 | 0.01    | 1.902   | 7.57137344  | 1.17E-16    | ** |
| siR_16656  | 0.01    | 5.1838  | 9.01786625  | 3.94E-44    | ** |
| siR_166560 | 0.01    | 4.2888  | 8.74443023  | 1.22E-36    | ** |
| siR_166563 | 9.0043  | 3.5802  | -1.33057394 | 4.70E-16    | ** |
| siR_16658  | 0.01    | 1.3053  | 7.02823761  | 1.15E-11    | ** |
| siR_166589 | 0.01    | 1.4918  | 7.22091032  | 3.17E-13    | ** |
| siR_16659  | 0.01    | 1.4918  | 7.22091032  | 3.17E-13    | ** |
| siR_166606 | 0.01    | 24.875  | 11.28048081 | 5.81E-209   | ** |
| siR_166607 | 0.01    | 1.1934  | 6.89893387  | 9.98E-11    | ** |

|            |         |          |             |             |    |
|------------|---------|----------|-------------|-------------|----|
| siR_166615 | 0.01    | 2.1258   | 7.73186206  | 1.57E-18    | ** |
| siR_166626 | 0.01    | 5.5195   | 9.10839377  | 6.11E-47    | ** |
| siR_166640 | 22.2271 | 17.7892  | -0.3213181  | 0.000235375 |    |
| siR_166647 | 0.01    | 5.333    | 9.05880352  | 2.22E-45    | ** |
| siR_166652 | 1.1344  | 0.8205   | -0.4673542  | 0.245331337 |    |
| siR_166665 | 1.2407  | 0.7832   | -0.66370165 | 0.09494326  |    |
| siR_166697 | 7.9408  | 3.0208   | -1.39435369 | 2.80E-15    | ** |
| siR_166707 | 0.01    | 1.6782   | 7.39077085  | 8.72E-15    | ** |
| siR_16678  | 0.01    | 1.6409   | 7.35834351  | 1.79E-14    | ** |
| siR_166790 | 1.6661  | 0.5594   | -1.57452284 | 8.69E-05    | ** |
| siR_166799 | 10.7059 | 6.7129   | -0.67339803 | 5.00E-07    |    |
| siR_166802 | 22.7234 | 17.3789  | -0.38684195 | 9.60E-06    |    |
| siR_166806 | 2.3042  | 1.9393   | -0.24872995 | 0.356805534 |    |
| siR_166811 | 0.9571  | 1.1934   | 0.31833611  | 0.399748725 |    |
| siR_166813 | 1.028   | 1.1188   | 0.12211189  | 0.744335346 |    |
| siR_166821 | 0.01    | 1.0442   | 6.70625425  | 1.77E-09    | ** |
| siR_166832 | 1.2053  | 0.3356   | -1.84457766 | 0.000205328 | ** |
| siR_166852 | 0.01    | 5.8178   | 9.18432989  | 1.94E-49    | ** |
| siR_166858 | 0.01    | 2.8716   | 8.16571099  | 8.93E-25    | ** |
| siR_166859 | 0.01    | 2.5733   | 8.00747585  | 2.81E-22    | ** |
| siR_166870 | 1.6661  | 1.1561   | -0.5272088  | 0.114277201 |    |
| siR_166894 | 1.4889  | 1.6036   | 0.10706746  | 0.731206568 |    |
| siR_166899 | 6.9482  | 3.5802   | -0.9565991  | 4.50E-08    |    |
| siR_166900 | 10.8831 | 8.2047   | -0.40756707 | 0.001313816 |    |
| siR_166903 | 43.2489 | 32.2219  | -0.42462187 | 2.72E-11    |    |
| siR_166904 | 13.2228 | 11.1136  | -0.25070149 | 0.025140477 |    |
| siR_166906 | 28.3245 | 24.0918  | -0.2335083  | 0.002184198 |    |
| siR_166913 | 0.01    | 39.4942  | 11.94742508 | 0           | ** |
| siR_166919 | 0.01    | 1.4545   | 7.18437949  | 6.51E-13    | ** |
| siR_166924 | 0.01    | 3.17     | 8.30833903  | 2.84E-27    | ** |
| siR_166949 | 75.6148 | 102.6327 | 0.44074992  | 1.99E-26    |    |
| siR_166950 | 0.7444  | 1.3799   | 0.89041376  | 0.022164994 |    |
| siR_166965 | 0.01    | 1.902    | 7.57137344  | 1.17E-16    | ** |
| siR_166967 | 1.8788  | 1.529    | -0.29722309 | 0.324937651 |    |
| siR_166983 | 0.01    | 1.6782   | 7.39077085  | 8.72E-15    | ** |
| siR_167040 | 1.8434  | 0.8951   | -1.04224838 | 0.002666955 | ** |
| siR_167062 | 2.2333  | 1.7528   | -0.34951567 | 0.210211825 |    |
| siR_167063 | 7.6217  | 4.5871   | -0.73253046 | 5.04E-06    |    |
| siR_167069 | 14.3572 | 14.3581  | 0.00009043  | 0.99833329  |    |
| siR_167091 | 3.155   | 2.163    | -0.54460634 | 0.02454311  |    |
| siR_167120 | 0.9571  | 1.9393   | 1.01879442  | 0.002355123 | ** |
| siR_167124 | 0.01    | 1.5663   | 7.29121675  | 7.54E-14    | ** |
| siR_167163 | 1.1698  | 1.0442   | -0.16386383 | 0.664155115 |    |
| siR_167188 | 0.01    | 1.8647   | 7.54279973  | 2.40E-16    | ** |
| siR_167194 | 0.01    | 1.1934   | 6.89893387  | 9.98E-11    | ** |
| siR_167203 | 0.01    | 1.7528   | 7.45351758  | 2.07E-15    | ** |
| siR_167223 | 1.9852  | 1.5663   | -0.3419238  | 0.247756469 |    |

|            |         |         |             |             |    |
|------------|---------|---------|-------------|-------------|----|
| siR_167232 | 2.1979  | 0.5221  | -2.07372768 | 4.84E-08    | ** |
| siR_167239 | 1.5243  | 1.1561  | -0.39888068 | 0.243089184 |    |
| siR_167245 | 1.2053  | 1.4172  | 0.23365109  | 0.493306632 |    |
| siR_167247 | 0.01    | 2.4241  | 7.9213054   | 4.98E-21    | ** |
| siR_167256 | 0.8508  | 1.0069  | 0.24302847  | 0.549089802 |    |
| siR_167272 | 0.01    | 50.1602 | 12.29232739 | 0           | ** |
| siR_167278 | 0.01    | 3.3937  | 8.40671523  | 3.81E-29    | ** |
| siR_167295 | 4.8921  | 1.9766  | -1.30743295 | 3.76E-09    | ** |
| siR_167296 | 1.5598  | 2.0885  | 0.42110609  | 0.147160392 |    |
| siR_167305 | 3.9349  | 4.699   | 0.2560268   | 0.172651996 |    |
| siR_167309 | 0.01    | 1.4172  | 7.14689956  | 1.34E-12    | ** |
| siR_167339 | 1.4534  | 0.634   | -1.19687707 | 0.002948104 | ** |
| siR_167350 | 1.0989  | 1.3053  | 0.24832132  | 0.48614194  |    |
| siR_167353 | 14.5345 | 9.4726  | -0.61764907 | 5.75E-08    |    |
| siR_167364 | 2.5524  | 1.6036  | -0.67054012 | 0.014978839 |    |
| siR_167378 | 3.4032  | 0.9696  | -1.81143033 | 4.72E-10    | ** |
| siR_167394 | 1.5952  | 0.634   | -1.33118257 | 0.000706761 | ** |
| siR_167395 | 0.01    | 1.3799  | 7.10841991  | 2.74E-12    | ** |
| siR_167405 | 12.3011 | 8.3538  | -0.55828282 | 5.16E-06    |    |
| siR_167415 | 0.01    | 3.5056  | 8.45351758  | 4.40E-30    | ** |
| siR_167420 | 1.4889  | 0.4848  | -1.61878526 | 0.000157192 | ** |
| siR_167445 | 0.6735  | 1.1188  | 0.73220231  | 0.082062589 |    |
| siR_167446 | 0.01    | 1.8647  | 7.54279973  | 2.40E-16    | ** |
| siR_167457 | 0.01    | 12.7172 | 10.31256535 | 3.43E-107   | ** |
| siR_167458 | 0.01    | 1.3426  | 7.06888574  | 5.63E-12    | ** |
| siR_167465 | 0.01    | 31.1404 | 11.60457176 | 2.08E-261   | ** |
| siR_167466 | 0.01    | 12.6053 | 10.29981474 | 2.96E-106   | ** |
| siR_167467 | 0.01    | 1.0069  | 6.6537766   | 3.63E-09    | ** |
| siR_167477 | 0.01    | 6.6756  | 9.3827537   | 1.28E-56    | ** |
| siR_167478 | 0.01    | 3.7667  | 8.55715732  | 2.87E-32    | ** |
| siR_167479 | 0.01    | 1.4918  | 7.22091032  | 3.17E-13    | ** |
| siR_167483 | 0.01    | 33.4899 | 11.70951035 | 4.48E-281   | ** |
| siR_167484 | 0.01    | 1.3426  | 7.06888574  | 5.63E-12    | ** |
| siR_167503 | 1.6307  | 1.1561  | -0.4962252  | 0.13940294  |    |
| siR_167523 | 1.9497  | 1.268   | -0.62069741 | 0.047504913 |    |
| siR_167527 | 0.01    | 1.3799  | 7.10841991  | 2.74E-12    | ** |
| siR_167534 | 0.01    | 14.8803 | 10.5391879  | 2.68E-125   | ** |
| siR_167543 | 0.01    | 1.1188  | 6.80580835  | 4.20E-10    | ** |
| siR_167552 | 3.4741  | 5.2584  | 0.59798461  | 0.001501333 |    |
| siR_167555 | 0.01    | 10.5542 | 10.04360151 | 4.38E-89    | ** |
| siR_167568 | 1.5952  | 1.7155  | 0.10489181  | 0.727843234 |    |
| siR_167606 | 1.2407  | 0.4475  | -1.47119473 | 0.001326969 | ** |
| siR_167612 | 12.3011 | 12.7918 | 0.05643196  | 0.606895956 |    |
| siR_167625 | 0.01    | 1.268   | 6.98641094  | 2.37E-11    | ** |
| siR_167655 | 12.1239 | 9.2489  | -0.39050016 | 0.001117061 |    |
| siR_167660 | 0.01    | 3.2819  | 8.35838747  | 3.29E-28    | ** |
| siR_167663 | 0.01    | 8.5403  | 9.73814294  | 3.16E-72    | ** |

|            |         |          |             |             |    |
|------------|---------|----------|-------------|-------------|----|
| siR_167668 | 3.4386  | 1.6409   | -1.06733398 | 2.66E-05    | ** |
| siR_167677 | 24.1414 | 10.7033  | -1.17345367 | 1.63E-33    | ** |
| siR_167681 | 0.01    | 8.9878   | 9.81182421  | 5.67E-76    | ** |
| siR_167703 | 0.01    | 1.6409   | 7.35834351  | 1.79E-14    | ** |
| siR_16771  | 0.01    | 2.0885   | 7.70632333  | 3.21E-18    | ** |
| siR_167720 | 1.1698  | 1.8274   | 0.64353057  | 0.046484149 |    |
| siR_167732 | 0.01    | 1.902    | 7.57137344  | 1.17E-16    | ** |
| siR_167743 | 1.5952  | 0.5967   | -1.41865963 | 0.000378908 | ** |
| siR_167755 | 3.3323  | 3.2073   | -0.05515898 | 0.80027253  |    |
| siR_167762 | 2.446   | 2.8343   | 0.21256807  | 0.375655786 |    |
| siR_167777 | 0.01    | 131.5355 | 13.6831646  | 0           | ** |
| siR_167778 | 0.01    | 1.4172   | 7.14689956  | 1.34E-12    | ** |
| siR_167779 | 0.01    | 1.0442   | 6.70625425  | 1.77E-09    | ** |
| siR_167787 | 0.01    | 46.2071  | 12.17389883 | 0           | ** |
| siR_167795 | 0.01    | 10.3677  | 10.01788016 | 1.59E-87    | ** |
| siR_167796 | 0.01    | 1.4545   | 7.18437949  | 6.51E-13    | ** |
| siR_167803 | 0.01    | 13.4631  | 10.39479493 | 1.96E-113   | ** |
| siR_167804 | 0.01    | 4.699    | 8.87620996  | 4.51E-40    | ** |
| siR_167805 | 0.01    | 1.1188   | 6.80580835  | 4.20E-10    | ** |
| siR_167820 | 0.01    | 5.0347   | 8.97576201  | 6.99E-43    | ** |
| siR_167823 | 7.2318  | 3.5429   | -1.02942403 | 3.03E-09    | ** |
| siR_16783  | 1.0989  | 0.4848   | -1.1805985  | 0.010852128 | *  |
| siR_167831 | 0.01    | 4.8109   | 8.910163    | 5.22E-41    | ** |
| siR_167839 | 0.01    | 5.706    | 9.15633594  | 1.68E-48    | ** |
| siR_167868 | 0.01    | 9.6218   | 9.910163    | 2.79E-81    | ** |
| siR_167870 | 0.01    | 43.2236  | 12.07760352 | 0           | ** |
| siR_167871 | 0.01    | 6.0043   | 9.22985225  | 5.34E-51    | ** |
| siR_167874 | 0.01    | 11.1509  | 10.12294444 | 4.44E-94    | ** |
| siR_167875 | 0.01    | 9.3235   | 9.86472783  | 8.79E-79    | ** |
| siR_167876 | 0.01    | 3.9904   | 8.64038956  | 3.85E-34    | ** |
| siR_167877 | 0.01    | 3.1327   | 8.29126281  | 5.83E-27    | ** |
| siR_167878 | 0.01    | 2.1258   | 7.73186206  | 1.57E-18    | ** |
| siR_167882 | 0.01    | 6.4891   | 9.34187459  | 4.67E-55    | ** |
| siR_167883 | 0.01    | 1.3053   | 7.02823761  | 1.15E-11    | ** |
| siR_167897 | 22.0144 | 18.274   | -0.26865506 | 0.002013096 |    |
| siR_167900 | 2.1979  | 1.3799   | -0.67156203 | 0.023914899 |    |
| siR_16791  | 1.0989  | 0.5967   | -0.88098242 | 0.045030158 |    |
| siR_167918 | 4.2894  | 2.3122   | -0.89150967 | 5.23E-05    |    |
| siR_167931 | 1.0989  | 0.8951   | -0.29593933 | 0.456310342 |    |
| siR_167934 | 5.9201  | 4.1023   | -0.52918855 | 0.002626709 |    |
| siR_167969 | 1.5952  | 1.0069   | -0.66381691 | 0.057559607 |    |
| siR_167972 | 1.418   | 0.7459   | -0.9268034  | 0.017122488 |    |
| siR_168015 | 1.028   | 0.4848   | -1.08437866 | 0.021479092 | *  |
| siR_168016 | 1.2407  | 0.4102   | -1.59675492 | 0.000655154 | ** |
| siR_168028 | 0.01    | 2.5733   | 8.00747585  | 2.81E-22    | ** |
| siR_16803  | 3.8286  | 1.1934   | -1.68173926 | 3.45E-10    | ** |
| siR_168034 | 0.01    | 26.3668  | 11.36450677 | 1.89E-221   | ** |

|            |           |          |             |             |    |
|------------|-----------|----------|-------------|-------------|----|
| siR_168046 | 0.01      | 13.1647  | 10.36245893 | 6.15E-111   | ** |
| siR_168049 | 0.6735    | 1.268    | 0.91280489  | 0.02525345  |    |
| siR_168074 | 0.01      | 4.4007   | 8.78158921  | 1.42E-37    | ** |
| siR_16808  | 0.01      | 1.3799   | 7.10841991  | 2.74E-12    | ** |
| siR_168091 | 2.4815    | 0.5967   | -2.05613477 | 7.78E-09    | ** |
| siR_168122 | 1.3825    | 0.8951   | -0.62715871 | 0.093219647 |    |
| siR_168152 | 0.01      | 1.1188   | 6.80580835  | 4.20E-10    | ** |
| siR_168170 | 6.7       | 3.6548   | -0.87436864 | 6.35E-07    |    |
| siR_168176 | 1.1698    | 1.0069   | -0.21634148 | 0.569256367 |    |
| siR_168246 | 0.01      | 2.6479   | 8.04870483  | 6.67E-23    | ** |
| siR_168282 | 1062.6478 | 488.2886 | -1.12185751 | 0           | ** |
| siR_168283 | 28.3245   | 11.1136  | -1.34972427 | 3.84E-48    | ** |
| siR_168293 | 643.4876  | 240.9184 | -1.41736777 | 0           | ** |
| siR_168294 | 16.7678   | 7.1977   | -1.22008554 | 3.53E-25    | ** |
| siR_168300 | 0.01      | 2.9835   | 8.22086197  | 1.03E-25    | ** |
| siR_168361 | 0.01      | 2.4987   | 7.96503389  | 1.18E-21    | ** |
| siR_168363 | 0.01      | 1.6409   | 7.35834351  | 1.79E-14    | ** |
| siR_168382 | 0.01      | 1.3053   | 7.02823761  | 1.15E-11    | ** |
| siR_168397 | 1.6661    | 0.2611   | -2.67380063 | 3.67E-08    | ** |
| siR_168398 | 1.4534    | 0.634    | -1.19687707 | 0.002948104 | ** |
| siR_16840  | 1.6307    | 0.7832   | -1.05803872 | 0.004283913 | ** |
| siR_168402 | 2.7296    | 0.6713   | -2.02366    | 2.00E-09    | ** |
| siR_168404 | 2.6233    | 1.0069   | -1.38146239 | 7.21E-06    | ** |
| siR_168418 | 1.6307    | 1.1188   | -0.54353923 | 0.108335711 |    |
| siR_168420 | 1.2762    | 1.0815   | -0.23882077 | 0.512575605 |    |
| siR_168438 | 2.5169    | 1.2307   | -1.03216877 | 0.000481965 | ** |
| siR_168442 | 0.01      | 1.9766   | 7.62687714  | 2.78E-17    | ** |
| siR_168449 | 0.01      | 1.4172   | 7.14689956  | 1.34E-12    | ** |
| siR_168457 | 0.01      | 6.1162   | 9.25649177  | 6.18E-52    | ** |
| siR_168465 | 1.2053    | 1.1188   | -0.10744012 | 0.77139317  |    |
| siR_168480 | 4.573     | 3.3564   | -0.44622626 | 0.023820805 |    |
| siR_168482 | 4.1476    | 1.1934   | -1.79719908 | 7.59E-12    | ** |
| siR_168502 | 0.01      | 3.0208   | 8.23878686  | 5.04E-26    | ** |
| siR_168505 | 0.01      | 1.6036   | 7.32517051  | 3.67E-14    | ** |
| siR_168513 | 0.01      | 1.7155   | 7.42248532  | 4.25E-15    | ** |
| siR_168531 | 0.01      | 23.2714  | 11.18434229 | 1.54E-195   | ** |
| siR_168539 | 0.01      | 35.7648  | 11.80432466 | 4.05E-300   | ** |
| siR_168547 | 0.01      | 2.3495   | 7.87620996  | 2.10E-20    | ** |
| siR_168559 | 1.6307    | 1.4545   | -0.1649681  | 0.603842949 |    |
| siR_168563 | 1.7725    | 1.4918   | -0.2487315  | 0.420152445 |    |
| siR_168634 | 1.3116    | 1.0069   | -0.3814074  | 0.299984274 |    |
| siR_168647 | 4.3603    | 0.6713   | -2.69939785 | 1.66E-19    | ** |
| siR_168648 | 1.0989    | 0.1492   | -2.88074067 | 3.93E-06    | ** |
| siR_168682 | 0.01      | 1.1188   | 6.80580835  | 4.20E-10    | ** |
| siR_168722 | 2.7651    | 2.3495   | -0.23497789 | 0.338612627 |    |
| siR_168725 | 2.3042    | 1.5663   | -0.55690538 | 0.05035022  |    |
| siR_168727 | 0.01      | 1.4172   | 7.14689956  | 1.34E-12    | ** |



|            |         |         |             |             |    |
|------------|---------|---------|-------------|-------------|----|
| siR_168773 | 6.0619  | 2.3868  | -1.34469237 | 1.96E-11    | ** |
| siR_168804 | 2.5524  | 1.4172  | -0.84881107 | 0.002832475 |    |
| siR_168810 | 0.01    | 3.2819  | 8.35838747  | 3.29E-28    | ** |
| siR_168848 | 0.01    | 1.1188  | 6.80580835  | 4.20E-10    | ** |
| siR_168855 | 1.3825  | 2.2376  | 0.69467268  | 0.018305677 |    |
| siR_168948 | 0.01    | 2.2749  | 7.82965932  | 8.83E-20    | ** |
| siR_168966 | 0.01    | 1.3053  | 7.02823761  | 1.15E-11    | ** |
| siR_168982 | 0.5672  | 1.0069  | 0.82799097  | 0.066924076 |    |
| siR_169006 | 1.6661  | 1.4545  | -0.1959517  | 0.534913814 |    |
| siR_169012 | 1.1698  | 0.5594  | -1.06430974 | 0.015477614 | *  |
| siR_169068 | 2.2333  | 0.5221  | -2.096779   | 3.01E-08    | ** |
| siR_16910  | 1.5952  | 0.7086  | -1.17069394 | 0.002183895 | ** |
| siR_16912  | 1.4534  | 0.9323  | -0.64056564 | 0.079347154 |    |
| siR_169120 | 0.01    | 1.4172  | 7.14689956  | 1.34E-12    | ** |
| siR_169126 | 53.494  | 53.1438 | -0.00947569 | 0.859376265 |    |
| siR_169130 | 1.9497  | 2.2376  | 0.19870001  | 0.460760798 |    |
| siR_169132 | 3.8995  | 2.1258  | -0.87528328 | 0.000147014 |    |
| siR_16914  | 9.1106  | 5.2211  | -0.80319228 | 6.48E-08    |    |
| siR_169149 | 8.508   | 2.9462  | -1.52996466 | 1.88E-18    | ** |
| siR_169227 | 0.01    | 4.9228  | 8.94333532  | 6.04E-42    | ** |
| siR_169265 | 2.9778  | 1.9393  | -0.61871086 | 0.014319214 |    |
| siR_169287 | 0.01    | 1.6036  | 7.32517051  | 3.67E-14    | ** |
| siR_169293 | 0.01    | 1.7528  | 7.45351758  | 2.07E-15    | ** |
| siR_169321 | 1.8079  | 0.4848  | -1.89885328 | 3.13E-06    | ** |
| siR_169328 | 0.01    | 1.7901  | 7.48389637  | 1.01E-15    | ** |
| siR_169343 | 2.9423  | 1.1934  | -1.30186667 | 5.49E-06    | ** |
| siR_169351 | 3.155   | 3.8413  | 0.28395464  | 0.173733593 |    |
| siR_169352 | 13.1165 | 7.6079  | -0.78581261 | 1.92E-10    |    |
| siR_169380 | 1.4889  | 0.5594  | -1.4122947  | 0.000627722 | ** |
| siR_169389 | 6.0619  | 4.5126  | -0.42581115 | 0.012622605 |    |
| siR_169396 | 0.01    | 1.6782  | 7.39077085  | 8.72E-15    | ** |
| siR_169427 | 1.3471  | 0.4102  | -1.71545755 | 0.000183816 | ** |
| siR_169464 | 2.8005  | 5.1093  | 0.86744122  | 1.48E-05    |    |
| siR_169496 | 0.01    | 1.8647  | 7.54279973  | 2.40E-16    | ** |
| siR_169501 | 0.01    | 2.8343  | 8.14684866  | 1.83E-24    | ** |
| siR_169511 | 1.7016  | 1.2307  | -0.46741281 | 0.152751652 |    |
| siR_169528 | 4.0767  | 1.7901  | -1.18736161 | 6.15E-07    | ** |
| siR_169529 | 11.5212 | 4.699   | -1.29386532 | 2.43E-19    | ** |
| siR_169549 | 1.5952  | 0.3356  | -2.24892269 | 1.10E-06    | ** |
| siR_169550 | 1.0989  | 0.2611  | -2.07338574 | 0.000132441 | ** |
| siR_169552 | 5.7429  | 1.4545  | -1.98125614 | 7.04E-18    | ** |
| siR_169557 | 1.028   | 1.1561  | 0.16942593  | 0.649430129 |    |
| siR_169568 | 0.01    | 1.268   | 6.98641094  | 2.37E-11    | ** |
| siR_169590 | 2.8005  | 1.0442  | -1.42328636 | 2.09E-06    | ** |
| siR_169604 | 2.4106  | 1.7155  | -0.49076315 | 0.074291384 |    |
| siR_169621 | 2.6233  | 2.2749  | -0.20557967 | 0.41279343  |    |
| siR_169680 | 2.127   | 0.9323  | -1.18995386 | 0.000326206 | ** |

|            |         |         |             |             |    |
|------------|---------|---------|-------------|-------------|----|
| siR_169741 | 1.3116  | 0.5594  | -1.22937565 | 0.003968625 | ** |
| siR_169760 | 1.2407  | 0.4102  | -1.59675492 | 0.000655154 | ** |
| siR_169785 | 0.01    | 3.9159  | 8.61320011  | 1.62E-33    | ** |
| siR_169790 | 0.01    | 14.2836 | 10.48014392 | 2.65E-120   | ** |
| siR_169820 | 1.2407  | 2.4987  | 1.01002338  | 0.00059769  | ** |
| siR_169850 | 0.01    | 5.1838  | 9.01786625  | 3.94E-44    | ** |
| siR_16986  | 1.9497  | 0.8951  | -1.12313138 | 0.001024698 | ** |
| siR_169877 | 1.6661  | 0.8205  | -1.02189976 | 0.004996607 | ** |
| siR_169891 | 0.01    | 6.7502  | 9.39878644  | 3.05E-57    | ** |
| siR_169892 | 0.01    | 5.2211  | 9.02820998  | 1.92E-44    | ** |
| siR_169898 | 0.0354  | 37.1447 | 10.0351913  | 0.00E+00    | ** |
| siR_169899 | 0.0709  | 19.2063 | 8.08157827  | 5.81E-157   | ** |
| siR_169900 | 0.01    | 2.7225  | 8.08878824  | 1.58E-23    | ** |
| siR_169901 | 0.01    | 2.0885  | 7.70632333  | 3.21E-18    | ** |
| siR_169902 | 0.01    | 1.8274  | 7.51364865  | 4.92E-16    | ** |
| siR_169908 | 0.01    | 11.8967 | 10.21634573 | 2.53E-100   | ** |
| siR_169909 | 0.01    | 3.8413  | 8.58545083  | 6.83E-33    | ** |
| siR_169910 | 0.01    | 2.1258  | 7.73186206  | 1.57E-18    | ** |
| siR_169923 | 0.01    | 3.5429  | 8.46878694  | 2.15E-30    | ** |
| siR_169927 | 0.01    | 3.0208  | 8.23878686  | 5.04E-26    | ** |
| siR_169935 | 0.01    | 1.0442  | 6.70625425  | 1.77E-09    | ** |
| siR_169970 | 1.2407  | 0.7086  | -0.80811094 | 0.047445627 |    |
| siR_170012 | 0.01    | 3.0208  | 8.23878686  | 5.04E-26    | ** |
| siR_170016 | 0.01    | 1.4172  | 7.14689956  | 1.34E-12    | ** |
| siR_170019 | 0.01    | 31.6252 | 11.62685889 | 1.82E-265   | ** |
| siR_170020 | 0.01    | 1.0442  | 6.70625425  | 1.77E-09    | ** |
| siR_170027 | 0.01    | 1.3426  | 7.06888574  | 5.63E-12    | ** |
| siR_170047 | 46.9357 | 26.7024 | -0.81371626 | 1.93E-35    |    |
| siR_170049 | 5.9201  | 1.3053  | -2.18124012 | 1.35E-20    | ** |
| siR_170060 | 86.3915 | 60.0431 | -0.52489091 | 2.73E-30    |    |
| siR_170067 | 0.01    | 2.2003  | 7.78155643  | 3.72E-19    | ** |
| siR_170071 | 0.01    | 5.5568  | 9.11811051  | 2.98E-47    | ** |
| siR_170076 | 0.01    | 1.7155  | 7.42248532  | 4.25E-15    | ** |
| siR_170079 | 0.01    | 2.6479  | 8.04870483  | 6.67E-23    | ** |
| siR_170080 | 0.01    | 2.2376  | 7.80580835  | 1.81E-19    | ** |
| siR_170108 | 52.9622 | 18.6096 | -1.50891601 | 2.81E-104   | ** |
| siR_170124 | 0.01    | 11.7103 | 10.19356232 | 9.21E-99    | ** |
| siR_170140 | 26.1266 | 19.0945 | -0.45236225 | 4.08E-08    |    |
| siR_170143 | 25.1695 | 20.6235 | -0.28738736 | 0.000429483 |    |
| siR_170149 | 1.418   | 0.634   | -1.16130279 | 0.004153001 | ** |
| siR_170154 | 5.6011  | 3.6175  | -0.63071717 | 0.000613048 |    |
| siR_170156 | 1.0635  | 0.4102  | -1.37442064 | 0.004842593 | ** |
| siR_170184 | 0.01    | 1.0069  | 6.6537766   | 3.63E-09    | ** |
| siR_170199 | 1.3471  | 0.4848  | -1.47439535 | 0.000796247 | ** |
| siR_170202 | 1.737   | 1.1561  | -0.58733156 | 0.075331494 |    |
| siR_170250 | 0.01    | 3.9159  | 8.61320011  | 1.62E-33    | ** |
| siR_170252 | 17.6186 | 8.4284  | -1.0637686  | 1.72E-21    | ** |

|            |         |         |             |             |    |
|------------|---------|---------|-------------|-------------|----|
| siR_170268 | 0.01    | 1.5663  | 7.29121675  | 7.54E-14    | ** |
| siR_170284 | 8.3662  | 3.9904  | -1.06803912 | 4.87E-11    | ** |
| siR_170285 | 2.446   | 1.0069  | -1.28050399 | 4.39E-05    | ** |
| siR_170304 | 1.5952  | 1.4545  | -0.13321402 | 0.67732156  |    |
| siR_170305 | 29.8134 | 29.1638 | -0.0317822  | 0.658113793 |    |
| siR_170319 | 0.01    | 1.0815  | 6.75688986  | 8.62E-10    | ** |
| siR_170325 | 16.6969 | 15.5888 | -0.0990704  | 0.307394841 |    |
| siR_170337 | 0.01    | 11.5611 | 10.17506296 | 1.63E-97    | ** |
| siR_170360 | 0.01    | 13.9479 | 10.44583221 | 1.71E-117   | ** |
| siR_170365 | 0.01    | 4.9974  | 8.96503389  | 1.43E-42    | ** |
| siR_170385 | 2.3042  | 2.2749  | -0.01846282 | 0.945377782 |    |
| siR_170386 | 0.01    | 2.6106  | 8.02823761  | 1.37E-22    | ** |
| siR_170394 | 0.01    | 1.9766  | 7.62687714  | 2.78E-17    | ** |
| siR_170396 | 10.0323 | 5.0347  | -0.99467467 | 1.09E-11    |    |
| siR_170398 | 1.1698  | 0.4848  | -1.27080029 | 0.005319168 | ** |
| siR_17043  | 5.6011  | 1.529   | -1.87312178 | 2.54E-16    | ** |
| siR_17044  | 1.4889  | 0.7459  | -0.99719273 | 0.009388402 |    |
| siR_170447 | 0.01    | 4.1396  | 8.69334756  | 2.17E-35    | ** |
| siR_170451 | 1.4534  | 1.7901  | 0.30060837  | 0.327757351 |    |
| siR_170452 | 1.1698  | 0.3356  | -1.80144727 | 0.000321486 | ** |
| siR_170463 | 0.2127  | 1.1188  | 2.39506022  | 2.14E-05    | ** |
| siR_170507 | 0.01    | 2.0885  | 7.70632333  | 3.21E-18    | ** |
| siR_170509 | 0.01    | 1.1188  | 6.80580835  | 4.20E-10    | ** |
| siR_170541 | 1.7725  | 0.7086  | -1.32274226 | 0.000375473 | ** |
| siR_170546 | 2.9069  | 1.5663  | -0.89212088 | 0.000882251 |    |
| siR_170550 | 1.4534  | 0.5221  | -1.47703375 | 0.000479018 | ** |
| siR_170562 | 0.01    | 4.2888  | 8.74443023  | 1.22E-36    | ** |
| siR_17057  | 0.01    | 7.1231  | 9.47636143  | 2.30E-60    | ** |
| siR_170613 | 2.1979  | 0.7459  | -1.55907162 | 7.20E-06    | ** |
| siR_170616 | 1.2053  | 0.4848  | -1.31393068 | 0.003684871 | ** |
| siR_170691 | 0.01    | 1.6782  | 7.39077085  | 8.72E-15    | ** |
| siR_170710 | 21.8017 | 10.3304 | -1.07754452 | 9.71E-27    | ** |
| siR_170729 | 0.01    | 17.5654 | 10.77852071 | 8.95E-148   | ** |
| siR_170751 | 2.446   | 1.268   | -0.94786966 | 0.00134367  |    |
| siR_170788 | 0.01    | 3.9159  | 8.61320011  | 1.62E-33    | ** |
| siR_170789 | 0.01    | 2.3495  | 7.87620996  | 2.10E-20    | ** |
| siR_170792 | 0.01    | 1.5663  | 7.29121675  | 7.54E-14    | ** |
| siR_17082  | 0.01    | 1.0069  | 6.6537766   | 3.63E-09    | ** |
| siR_170862 | 0.01    | 3.7294  | 8.54279973  | 5.90E-32    | ** |
| siR_170872 | 3.2614  | 1.7901  | -0.86545121 | 0.000591443 |    |
| siR_17090  | 0.01    | 1.4918  | 7.22091032  | 3.17E-13    | ** |
| siR_170900 | 0.01    | 1.0815  | 6.75688986  | 8.62E-10    | ** |
| siR_170917 | 5.7783  | 4.2142  | -0.45538632 | 0.009582569 |    |
| siR_170925 | 1.5243  | 1.1188  | -0.44619471 | 0.195244239 |    |
| siR_170939 | 1.2407  | 0.5594  | -1.14920216 | 0.007946935 | ** |
| siR_17096  | 0.01    | 2.536   | 7.98641094  | 5.76E-22    | ** |
| siR_17099  | 0.01    | 1.0442  | 6.70625425  | 1.77E-09    | ** |

|            |         |         |              |             |    |
|------------|---------|---------|--------------|-------------|----|
| siR_170993 | 0.01    | 2.3495  | 7.87620996   | 2.10E-20    | ** |
| siR_171000 | 1.2053  | 1.268   | 0.07316247   | 0.832610508 |    |
| siR_171002 | 3.1196  | 1.8274  | -0.7715686   | 0.002331203 |    |
| siR_171006 | 3.2968  | 3.6548  | 0.14872609   | 0.476184557 |    |
| siR_171025 | 15.7043 | 12.7918 | -0.29594035  | 0.004252868 |    |
| siR_171029 | 11.9821 | 12.1578 | 0.02100141   | 0.85034488  |    |
| siR_171032 | 1.0989  | 1.2307  | 0.16341902   | 0.650589112 |    |
| siR_17108  | 1.7725  | 1.9766  | 0.15723532   | 0.580183064 |    |
| siR_171088 | 1.737   | 1.0815  | -0.68356409  | 0.041819133 |    |
| siR_171091 | 0.01    | 14.9175 | 10.54279006  | 1.31E-125   | ** |
| siR_171096 | 0.01    | 5.2957  | 9.04867759   | 4.56E-45    | ** |
| siR_171099 | 10.2096 | 5.4449  | -0.90694889  | 2.21E-10    |    |
| siR_17113  | 1.3471  | 0.8578  | -0.65114373  | 0.086805871 |    |
| siR_171131 | 1.0635  | 0.4102  | -1.37442064  | 0.004842593 | ** |
| siR_171183 | 2.127   | 1.2307  | -0.78934091  | 0.010544665 |    |
| siR_171206 | 1.0635  | 0.7086  | -0.58577666  | 0.167596979 |    |
| siR_171207 | 1.0635  | 0.7832  | -0.44136736  | 0.286432527 |    |
| siR_171225 | 5.1757  | 3.6921  | -0.48731237  | 0.009102977 |    |
| siR_171236 | 0.01    | 1.8274  | 7.51364865   | 4.92E-16    | ** |
| siR_171257 | 2.836   | 1.7901  | -0.66381735  | 0.010974873 |    |
| siR_171269 | 0.01    | 3.4683  | 8.43808488   | 9.04E-30    | ** |
| siR_171288 | 0.01    | 13.3512 | 10.3827537   | 1.69E-112   | ** |
| siR_171290 | 9.9614  | 11.5611 | 0.21485825   | 0.070449923 |    |
| siR_171292 | 0.01    | 1.4172  | 7.14689956   | 1.34E-12    | ** |
| siR_171311 | 0.01    | 4.2142  | 8.71911497   | 5.16E-36    | ** |
| siR_171312 | 6.7     | 6.0416  | -0.14923043  | 0.335148999 |    |
| siR_171331 | 1.0989  | 0.7459  | -0.55900597  | 0.178387672 |    |
| siR_171348 | 0.01    | 4.2142  | 8.71911497   | 5.16E-36    | ** |
| siR_171373 | 3.1905  | 0.01    | -8.31763871  | 7.88E-27    | ** |
| siR_171391 | 3.0841  | 0.01    | -8.26870574  | 5.85E-26    | ** |
| siR_171392 | 3.0487  | 0.01    | -8.25205038  | 1.14E-25    | ** |
| siR_17143  | 1.1344  | 1.1188  | -0.01997728  | 0.960392747 |    |
| siR_171463 | 2.9778  | 0.01    | -8.21810305  | 4.34E-25    | ** |
| siR_171481 | 10.8122 | 0.01    | -10.07844431 | 3.25E-89    | ** |
| siR_171482 | 7.09    | 0.01    | -9.46964185  | 9.53E-59    | ** |
| siR_171528 | 13.1165 | 0.01    | -10.3571671  | 4.49E-108   | ** |
| siR_171534 | 2.5169  | 0.01    | -7.97550407  | 2.57E-21    | ** |
| siR_17156  | 1.418   | 0.4102  | -1.78945814  | 7.68E-05    | ** |
| siR_171650 | 10.5995 | 0.01    | -10.04978054 | 1.79E-87    | ** |
| siR_171651 | 3.7222  | 0.01    | -8.54001177  | 3.50E-31    | ** |
| siR_171725 | 1.5243  | 0.01    | -7.25200305  | 3.42E-13    | ** |
| siR_171751 | 1.2762  | 0.01    | -6.99571063  | 3.67E-11    | ** |
| siR_171815 | 2.5169  | 0.01    | -7.97550407  | 2.57E-21    | ** |
| siR_171836 | 10.4577 | 0.01    | -10.03034988 | 2.59E-86    | ** |
| siR_171863 | 2.4815  | 0.01    | -7.95506863  | 5.01E-21    | ** |
| siR_171901 | 1.2407  | 0.01    | -6.95501051  | 7.17E-11    | ** |
| siR_171930 | 59.1305 | 0.01    | -12.52968642 | 0           | ** |

|            |          |         |              |             |    |
|------------|----------|---------|--------------|-------------|----|
| siR_172051 | 2.4815   | 0.01    | -7.95506863  | 5.01E-21    | ** |
| siR_172082 | 1.2053   | 0.01    | -6.91324847  | 1.40E-10    | ** |
| siR_172200 | 2.0561   | 0.01    | -7.68376661  | 1.52E-17    | ** |
| siR_172233 | 2.127    | 0.01    | -7.73267621  | 3.99E-18    | ** |
| siR_1724   | 0.01     | 2.0139  | 7.65384824   | 1.35E-17    | ** |
| siR_172486 | 1.418    | 0.01    | -7.14771372  | 2.54E-12    | ** |
| siR_172494 | 2.5169   | 0.01    | -7.97550407  | 2.57E-21    | ** |
| siR_172629 | 1.5243   | 0.01    | -7.25200305  | 3.42E-13    | ** |
| siR_172686 | 3.3677   | 0.01    | -8.39561983  | 2.79E-28    | ** |
| siR_172774 | 1.1344   | 0.01    | -6.82578563  | 5.32E-10    | ** |
| siR_172825 | 1.7016   | 0.01    | -7.41074813  | 1.21E-14    | ** |
| siR_172849 | 2.0206   | 0.01    | -7.65863995  | 2.96E-17    | ** |
| siR_172850 | 224.4337 | 0.01    | -14.45400133 | 0           | ** |
| siR_172851 | 150.0951 | 0.01    | -13.87358984 | 0           | ** |
| siR_172852 | 15.8461  | 0.01    | -10.62991211 | 2.04E-130   | ** |
| siR_172853 | 2.127    | 0.01    | -7.73267621  | 3.99E-18    | ** |
| siR_172854 | 1.8079   | 0.01    | -7.49817107  | 1.63E-15    | ** |
| siR_172855 | 1.1344   | 0.01    | -6.82578563  | 5.32E-10    | ** |
| siR_172856 | 1.1344   | 0.01    | -6.82578563  | 5.32E-10    | ** |
| siR_173006 | 1.418    | 0.01    | -7.14771372  | 2.54E-12    | ** |
| siR_173025 | 1.4889   | 0.01    | -7.21810305  | 6.67E-13    | ** |
| siR_173073 | 16.3424  | 0.01    | -10.67440422 | 1.77E-134   | ** |
| siR_173084 | 1.1344   | 0.01    | -6.82578563  | 5.32E-10    | ** |
| siR_173097 | 1.3471   | 0.01    | -7.07371314  | 9.66E-12    | ** |
| siR_173109 | 1.3116   | 0.01    | -7.035184    | 1.88E-11    | ** |
| siR_17313  | 8.6852   | 4.5126  | -0.94460017  | 1.41E-09    | ** |
| siR_173146 | 9.0752   | 0.01    | -9.82578561  | 5.37E-75    | ** |
| siR_17318  | 3.864    | 1.5663  | -1.30273453  | 1.80E-07    | ** |
| siR_173278 | 1.3825   | 0.01    | -7.11113566  | 4.95E-12    | ** |
| siR_173296 | 1.0635   | 0.01    | -6.73267622  | 2.02E-09    | ** |
| siR_173309 | 1.737    | 0.01    | -7.44045394  | 6.21E-15    | ** |
| siR_173353 | 1.418    | 0.01    | -7.14771372  | 2.54E-12    | ** |
| siR_173361 | 1.737    | 0.01    | -7.44045394  | 6.21E-15    | ** |
| siR_173382 | 4.3603   | 0.01    | -8.76828358  | 2.10E-36    | ** |
| siR_173387 | 2.9778   | 0.01    | -8.21810305  | 4.34E-25    | ** |
| siR_173410 | 1.1344   | 0.01    | -6.82578563  | 5.32E-10    | ** |
| siR_173417 | 1.8079   | 0.01    | -7.49817107  | 1.63E-15    | ** |
| siR_173450 | 8.2598   | 0.01    | -9.689963    | 2.53E-68    | ** |
| siR_17351  | 2.3042   | 1.8274  | -0.33447348  | 0.221939009 | ** |
| siR_17356  | 1.3825   | 0.2238  | -2.62699754  | 7.30E-07    | ** |
| siR_173560 | 1.8079   | 0.01    | -7.49817107  | 1.63E-15    | ** |
| siR_173570 | 3.8286   | 0.01    | -8.58067313  | 4.72E-32    | ** |
| siR_17362  | 40.2711  | 12.2324 | -1.71903739  | 7.87E-96    | ** |
| siR_17364  | 23.1134  | 5.7433  | -2.00877767  | 1.81E-68    | ** |
| siR_17370  | 1.3825   | 0.5967  | -1.2122018   | 0.003421985 | ** |
| siR_173735 | 2.446    | 0.01    | -7.93428061  | 9.77E-21    | ** |
| siR_173750 | 1.6661   | 0.01    | -7.38033118  | 2.36E-14    | ** |

|            |          |        |              |             |    |
|------------|----------|--------|--------------|-------------|----|
| siR_173781 | 1.028    | 0.01   | -6.68369645  | 3.95E-09    | ** |
| siR_173845 | 1.2407   | 0.01   | -6.95501051  | 7.17E-11    | ** |
| siR_173988 | 1.3471   | 0.01   | -7.07371314  | 9.66E-12    | ** |
| siR_174058 | 1.2762   | 0.01   | -6.99571063  | 3.67E-11    | ** |
| siR_174066 | 22.3689  | 0.01   | -11.12727844 | 8.33E-184   | ** |
| siR_1741   | 6.5937   | 3.5429 | -0.8961575   | 4.55E-07    |    |
| siR_174118 | 10.7413  | 0.01   | -10.06895291 | 1.24E-88    | ** |
| siR_174131 | 3.6868   | 0.01   | -8.52622535  | 6.83E-31    | ** |
| siR_174208 | 5.4947   | 0.01   | -9.10189688  | 1.09E-45    | ** |
| siR_174215 | 1.3471   | 0.01   | -7.07371314  | 9.66E-12    | ** |
| siR_174216 | 1.8788   | 0.01   | -7.55366769  | 4.29E-16    | ** |
| siR_174218 | 2.6233   | 0.01   | -8.035239    | 3.46E-22    | ** |
| siR_174221 | 1.1698   | 0.01   | -6.87011809  | 2.73E-10    | ** |
| siR_174226 | 107.0234 | 0.01   | -13.3856388  | 0           | ** |
| siR_174344 | 42.3981  | 0.01   | -12.04978406 | 0           | ** |
| siR_174359 | 1.418    | 0.01   | -7.14771372  | 2.54E-12    | ** |
| siR_1744   | 1.9852   | 0.3356 | -2.56446974  | 3.95E-09    | ** |
| siR_174431 | 5.8847   | 0.01   | -9.20082503  | 6.99E-49    | ** |
| siR_17444  | 4.7148   | 3.2073 | -0.55583727  | 0.005032774 |    |
| siR_17445  | 1.1344   | 0.1865 | -2.6046819   | 8.62E-06    | ** |
| siR_17447  | 1.3116   | 0.8578 | -0.61261459  | 0.109565176 |    |
| siR_174472 | 1.2053   | 0.01   | -6.91324847  | 1.40E-10    | ** |
| siR_17449  | 8.4016   | 2.4987 | -1.7494864   | 9.07E-22    | ** |
| siR_17450  | 1.3825   | 0.4102 | -1.75288008  | 0.0001191   | ** |
| siR_174509 | 1.2762   | 0.01   | -6.99571063  | 3.67E-11    | ** |
| siR_174527 | 1.1344   | 0.01   | -6.82578563  | 5.32E-10    | ** |
| siR_17459  | 4.3958   | 3.2446 | -0.43808512  | 0.029391782 |    |
| siR_17460  | 7.3736   | 3.0581 | -1.26973357  | 1.41E-12    | ** |
| siR_17461  | 6.4519   | 2.9835 | -1.1127183   | 2.44E-09    | ** |
| siR_17462  | 3.545    | 1.8274 | -0.95599317  | 9.78E-05    |    |
| siR_174750 | 1.8079   | 0.01   | -7.49817107  | 1.63E-15    | ** |
| siR_174976 | 1.3116   | 0.01   | -7.035184    | 1.88E-11    | ** |
| siR_175    | 23.9996  | 2.1258 | -3.49693258  | 4.18E-129   | ** |
| siR_175009 | 4.1831   | 0.01   | -8.70842867  | 5.92E-35    | ** |
| siR_175056 | 1.3471   | 0.01   | -7.07371314  | 9.66E-12    | ** |
| siR_175191 | 1.8079   | 0.01   | -7.49817107  | 1.63E-15    | ** |
| siR_175198 | 2.5878   | 0.01   | -8.0155823   | 6.75E-22    | ** |
| siR_175199 | 1.2762   | 0.01   | -6.99571063  | 3.67E-11    | ** |
| siR_175233 | 2.1979   | 0.01   | -7.77998195  | 1.05E-18    | ** |
| siR_175366 | 9.8905   | 0.01   | -9.94989969  | 1.14E-81    | ** |
| siR_175367 | 2.6942   | 0.01   | -8.07371315  | 9.10E-23    | ** |
| siR_175372 | 26.0203  | 0.01   | -11.34542197 | 1.08E-213   | ** |
| siR_175373 | 4.3603   | 0.01   | -8.76828358  | 2.10E-36    | ** |
| siR_175374 | 2.5524   | 0.01   | -7.99571063  | 1.32E-21    | ** |
| siR_175375 | 1.5598   | 0.01   | -7.28521726  | 1.75E-13    | ** |
| siR_175391 | 1.6307   | 0.01   | -7.34934759  | 4.61E-14    | ** |
| siR_175494 | 2.7651   | 0.01   | -8.11118786  | 2.39E-23    | ** |

|            |          |          |               |              |    |
|------------|----------|----------|---------------|--------------|----|
| siR_17550  | 1. 0635  | 0. 4848  | -1. 13335843  | 0. 015328041 | *  |
| siR_175521 | 1. 3471  | 0. 01    | -7. 07371314  | 9. 66E-12    | ** |
| siR_17558  | 8. 118   | 2. 2376  | -1. 85917218  | 8. 74E-23    | ** |
| siR_17561  | 8. 5789  | 3. 3937  | -1. 33793364  | 1. 75E-15    | ** |
| siR_17562  | 3. 4741  | 1. 3053  | -1. 41225786  | 1. 44E-07    | ** |
| siR_17563  | 2. 446   | 1. 268   | -0. 94786966  | 0. 00134367  |    |
| siR_17564  | 1. 1698  | 0. 7459  | -0. 64920776  | 0. 112106036 |    |
| siR_175661 | 2. 0561  | 0. 01    | -7. 68376661  | 1. 52E-17    | ** |
| siR_175670 | 3. 6159  | 0. 01    | -8. 49821097  | 2. 60E-30    | ** |
| siR_17570  | 2. 7651  | 2. 0139  | -0. 45733961  | 0. 072903407 |    |
| siR_175778 | 1. 5243  | 0. 01    | -7. 25200305  | 3. 42E-13    | ** |
| siR_175916 | 16. 5197 | 0. 01    | -10. 6899717  | 6. 26E-136   | ** |
| siR_175939 | 1. 1344  | 0. 01    | -6. 82578563  | 5. 32E-10    | ** |
| siR_176003 | 2. 5878  | 0. 01    | -8. 0155823   | 6. 75E-22    | ** |
| siR_176082 | 1. 1344  | 0. 01    | -6. 82578563  | 5. 32E-10    | ** |
| siR_176122 | 1. 4889  | 0. 01    | -7. 21810305  | 6. 67E-13    | ** |
| siR_176126 | 4. 5376  | 0. 01    | -8. 82578561  | 7. 42E-38    | ** |
| siR_176152 | 8. 9688  | 0. 01    | -9. 80877111  | 3. 99E-74    | ** |
| siR_17618  | 7. 6217  | 3. 9531  | -0. 94712837  | 1. 33E-08    |    |
| siR_176209 | 1. 0989  | 0. 01    | -6. 7799163   | 1. 04E-09    | ** |
| siR_176240 | 1. 737   | 0. 01    | -7. 44045394  | 6. 21E-15    | ** |
| siR_176246 | 11. 0958 | 0. 01    | -10. 11579799 | 1. 55E-91    | ** |
| siR_17631  | 14. 2509 | 14. 8803 | 0. 06235058   | 0. 540368554 |    |
| siR_176356 | 1. 9143  | 0. 01    | -7. 58067313  | 2. 20E-16    | ** |
| siR_17636  | 28. 9981 | 29. 4249 | 0. 02107914   | 0. 769116202 |    |
| siR_176392 | 1. 2762  | 0. 01    | -6. 99571063  | 3. 67E-11    | ** |
| siR_17643  | 0. 01    | 6. 2281  | 9. 2826483    | 7. 16E-53    | ** |
| siR_176461 | 4. 8921  | 0. 01    | -8. 93431011  | 9. 31E-41    | ** |
| siR_176492 | 4. 0413  | 0. 01    | -8. 65867564  | 8. 57E-34    | ** |
| siR_176593 | 1. 0989  | 0. 01    | -6. 7799163   | 1. 04E-09    | ** |
| siR_176620 | 1. 1698  | 0. 01    | -6. 87011809  | 2. 73E-10    | ** |
| siR_176658 | 25. 524  | 0. 01    | -11. 3176388  | 1. 25E-209   | ** |
| siR_176729 | 1. 5598  | 0. 01    | -7. 28521726  | 1. 75E-13    | ** |
| siR_176783 | 1. 0635  | 0. 01    | -6. 73267622  | 2. 02E-09    | ** |
| siR_176788 | 2. 7296  | 0. 01    | -8. 09254576  | 4. 66E-23    | ** |
| siR_176836 | 8. 0117  | 0. 01    | -9. 64596464  | 2. 72E-66    | ** |
| siR_176849 | 1. 8788  | 0. 01    | -7. 55366769  | 4. 29E-16    | ** |
| siR_176866 | 1. 3116  | 0. 01    | -7. 035184    | 1. 88E-11    | ** |
| siR_176975 | 4. 6439  | 0. 01    | -8. 85919308  | 1. 00E-38    | ** |
| siR_177    | 9. 9614  | 0. 8951  | -3. 47622774  | 3. 07E-54    | ** |
| siR_177071 | 5. 5302  | 0. 01    | -9. 11118782  | 5. 57E-46    | ** |
| siR_177085 | 2. 7651  | 0. 01    | -8. 11118786  | 2. 39E-23    | ** |
| siR_177103 | 1. 3116  | 0. 01    | -7. 035184    | 1. 88E-11    | ** |
| siR_177121 | 3. 7222  | 0. 01    | -8. 54001177  | 3. 50E-31    | ** |
| siR_177171 | 1. 1344  | 0. 01    | -6. 82578563  | 5. 32E-10    | ** |
| siR_177210 | 3. 0132  | 0. 01    | -8. 23515263  | 2. 23E-25    | ** |
| siR_177265 | 14. 9244 | 0. 01    | -10. 54345719 | 7. 15E-123   | ** |

|            |           |          |               |              |    |
|------------|-----------|----------|---------------|--------------|----|
| siR_177334 | 1. 8079   | 0. 01    | -7. 49817107  | 1. 63E-15    | ** |
| siR_177359 | 1. 1698   | 0. 01    | -6. 87011809  | 2. 73E-10    | ** |
| siR_177485 | 3. 4741   | 0. 01    | -8. 44049549  | 3. 76E-29    | ** |
| siR_177512 | 55. 621   | 0. 01    | -12. 44141404 | 0            | ** |
| siR_177513 | 1. 5952   | 0. 01    | -7. 31759351  | 8. 99E-14    | ** |
| siR_177594 | 5. 5656   | 0. 01    | -9. 12039339  | 2. 86E-46    | ** |
| siR_177620 | 5. 8138   | 0. 01    | -9. 18333764  | 2. 66E-48    | ** |
| siR_177647 | 1. 2053   | 0. 01    | -6. 91324847  | 1. 40E-10    | ** |
| siR_177649 | 2. 3397   | 0. 01    | -7. 87017976  | 7. 25E-20    | ** |
| siR_177652 | 1. 2053   | 0. 01    | -6. 91324847  | 1. 40E-10    | ** |
| siR_177658 | 2. 6942   | 0. 01    | -8. 07371315  | 9. 10E-23    | ** |
| siR_177685 | 1. 3116   | 0. 01    | -7. 035184    | 1. 88E-11    | ** |
| siR_177770 | 2. 3042   | 0. 01    | -7. 84812212  | 1. 41E-19    | ** |
| siR_17778  | 0. 01     | 4. 6617  | 8. 86471235   | 9. 25E-40    | ** |
| siR_177794 | 3. 5095   | 0. 01    | -8. 45512172  | 1. 93E-29    | ** |
| siR_177804 | 1. 1698   | 0. 01    | -6. 87011809  | 2. 73E-10    | ** |
| siR_177816 | 1. 9143   | 0. 01    | -7. 58067313  | 2. 20E-16    | ** |
| siR_17782  | 0. 01     | 5. 3703  | 9. 06885887   | 1. 08E-45    | ** |
| siR_177821 | 18. 6467  | 0. 01    | -10. 86470468 | 2. 44E-153   | ** |
| siR_177825 | 3. 9704   | 0. 01    | -8. 63314056  | 3. 26E-33    | ** |
| siR_177830 | 18. 6112  | 0. 01    | -10. 86195527 | 4. 76E-153   | ** |
| siR_177834 | 10. 7413  | 0. 01    | -10. 06895291 | 1. 24E-88    | ** |
| siR_177861 | 3. 7222   | 0. 01    | -8. 54001177  | 3. 50E-31    | ** |
| siR_17792  | 3. 3677   | 1. 5663  | -1. 10440306  | 1. 93E-05    | ** |
| siR_177959 | 1. 2762   | 0. 01    | -6. 99571063  | 3. 67E-11    | ** |
| siR_177974 | 5. 7783   | 0. 01    | -9. 17450131  | 5. 19E-48    | ** |
| siR_178022 | 1. 9852   | 0. 01    | -7. 63314056  | 5. 78E-17    | ** |
| siR_17824  | 1. 1698   | 2. 0139  | 0. 78373015   | 0. 012964318 |    |
| siR_17825  | 0. 01     | 1. 4172  | 7. 14689956   | 1. 34E-12    | ** |
| siR_178260 | 2. 3042   | 0. 01    | -7. 84812212  | 1. 41E-19    | ** |
| siR_17827  | 0. 6026   | 1. 7528  | 1. 54038881   | 6. 63E-05    | ** |
| siR_178299 | 1. 0989   | 0. 01    | -6. 7799163   | 1. 04E-09    | ** |
| siR_178430 | 2. 4106   | 0. 01    | -7. 91324847  | 1. 91E-20    | ** |
| siR_178431 | 1. 6661   | 0. 01    | -7. 38033118  | 2. 36E-14    | ** |
| siR_178514 | 1. 737    | 0. 01    | -7. 44045394  | 6. 21E-15    | ** |
| siR_178567 | 2. 836    | 0. 01    | -8. 14771372  | 6. 28E-24    | ** |
| siR_17858  | 6. 9482   | 3. 9531  | -0. 81365483  | 1. 84E-06    |    |
| siR_17860  | 235. 3522 | 74. 7369 | -1. 65492871  | 0            | ** |
| siR_178605 | 3. 5804   | 0. 01    | -8. 48397698  | 5. 07E-30    | ** |
| siR_17861  | 1. 9852   | 1. 0442  | -0. 9268863   | 0. 004648702 |    |
| siR_17864  | 2. 3751   | 0. 7832  | -1. 60053559  | 1. 96E-06    | ** |
| siR_178719 | 1. 3471   | 0. 01    | -7. 07371314  | 9. 66E-12    | ** |
| siR_17875  | 1. 3471   | 1. 3426  | -0. 0048274   | 0. 991679078 |    |
| siR_17879  | 0. 01     | 1. 268   | 6. 98641094   | 2. 37E-11    | ** |
| siR_178860 | 1. 7016   | 0. 01    | -7. 41074813  | 1. 21E-14    | ** |
| siR_178873 | 4. 2185   | 0. 01    | -8. 72058632  | 3. 03E-35    | ** |
| siR_178895 | 1. 418    | 0. 01    | -7. 14771372  | 2. 54E-12    | ** |



|            |         |         |              |               |    |
|------------|---------|---------|--------------|---------------|----|
| siR_178924 | 2.7296  | 0.01    | -8.09254576  | 4.66E-23      | ** |
| siR_178925 | 1.7016  | 0.01    | -7.41074813  | 1.21E-14      | ** |
| siR_178961 | 2.3397  | 0.01    | -7.87017976  | 7.25E-20      | ** |
| siR_17897  | 0.01    | 5.2211  | 9.02820998   | 1.92E-44      | ** |
| siR_179062 | 2.6233  | 0.01    | -8.035239    | 3.46E-22      | ** |
| siR_17929  | 14.1091 | 7.0858  | -0.99362331  | 8.01E-16      |    |
| siR_17930  | 5.1048  | 2.9089  | -0.81138074  | 4.59E-05      |    |
| siR_179420 | 2.1624  | 0.01    | -7.75648961  | 2.05E-18      | ** |
| siR_179421 | 1.5598  | 0.01    | -7.28521726  | 1.75E-13      | ** |
| siR_1795   | 2.3751  | 0.8205  | -1.53341302  | 3.99E-06      | ** |
| siR_179527 | 1.7016  | 0.01    | -7.41074813  | 1.21E-14      | ** |
| siR_179540 | 3.2968  | 0.01    | -8.36492254  | 1.06E-27      | ** |
| siR_179572 | 3.155   | 0.01    | -8.3014962   | 1.54E-26      | ** |
| siR_179718 | 1.3471  | 0.01    | -7.07371314  | 9.66E-12      | ** |
| siR_17972  | 1.4889  | 0.7086  | -1.07120349  | 0.005883379   | ** |
| siR_179749 | 38.8532 | 0.01    | -11.92381747 | 973135011737e | ** |
| siR_179754 | 2.1979  | 0.01    | -7.77998195  | 1.05E-18      | ** |
| siR_17981  | 2.2688  | 0.5594  | -2.01997728  | 4.96E-08      | ** |
| siR_179857 | 1.5952  | 0.01    | -7.31759351  | 8.99E-14      | ** |
| siR_17988  | 1.3471  | 2.6106  | 0.95452447   | 0.000811449   |    |
| siR_17989  | 42.8235 | 26.9262 | -0.66939207  | 1.36E-23      |    |
| siR_179931 | 2.2333  | 0.01    | -7.80303324  | 5.38E-19      | ** |
| siR_17994  | 0.01    | 6.6383  | 9.37467002   | 2.63E-56      | ** |
| siR_179985 | 1.1698  | 0.01    | -6.87011809  | 2.73E-10      | ** |
| siR_180015 | 1.6661  | 0.01    | -7.38033118  | 2.36E-14      | ** |
| siR_180125 | 10.635  | 0.01    | -10.0546043  | 9.19E-88      | ** |
| siR_180143 | 4.573   | 0.01    | -8.83699711  | 3.81E-38      | ** |
| siR_180150 | 14.0736 | 0.01    | -10.4587756  | 6.57E-116     | ** |
| siR_180159 | 5.2111  | 0.01    | -9.02544416  | 2.28E-43      | ** |
| siR_180176 | 2.0561  | 0.01    | -7.68376661  | 1.52E-17      | ** |
| siR_180218 | 2.9423  | 0.01    | -8.20080054  | 8.47E-25      | ** |
| siR_180229 | 10.0678 | 0.01    | -9.97553269  | 4.03E-83      | ** |
| siR_180252 | 1.2407  | 0.01    | -6.95501051  | 7.17E-11      | ** |
| siR_180259 | 1.8079  | 0.01    | -7.49817107  | 1.63E-15      | ** |
| siR_18027  | 3.4741  | 3.17    | -0.13215644  | 0.539104114   |    |
| siR_180327 | 1.3825  | 0.01    | -7.11113566  | 4.95E-12      | ** |
| siR_180350 | 1.737   | 0.01    | -7.44045394  | 6.21E-15      | ** |
| siR_180404 | 27.0129 | 0.01    | -11.39943282 | 8.13E-222     | ** |
| siR_180430 | 9.7487  | 0.01    | -9.92906603  | 1.65E-80      | ** |
| siR_180455 | 2.6942  | 0.01    | -8.07371315  | 9.10E-23      | ** |
| siR_180474 | 2.9778  | 0.01    | -8.21810305  | 4.34E-25      | ** |
| siR_18057  | 1.5243  | 1.1561  | -0.39888068  | 0.243089184   |    |
| siR_180592 | 6.6291  | 0.01    | -9.37266921  | 5.64E-55      | ** |
| siR_180596 | 1.028   | 0.01    | -6.68369645  | 3.95E-09      | ** |
| siR_180660 | 2.9778  | 0.01    | -8.21810305  | 4.34E-25      | ** |
| siR_180692 | 1.2407  | 0.01    | -6.95501051  | 7.17E-11      | ** |
| siR_180719 | 2.3751  | 0.01    | -7.89184446  | 3.72E-20      | ** |

|            |           |          |               |              |    |
|------------|-----------|----------|---------------|--------------|----|
| siR_180726 | 4. 0058   | 0. 01    | -8. 64594661  | 1. 67E-33    | ** |
| siR_180737 | 1. 9143   | 0. 01    | -7. 58067313  | 2. 20E-16    | ** |
| siR_18080  | 2. 3042   | 1. 268   | -0. 8617112   | 0. 004090052 |    |
| siR_180889 | 2. 2333   | 0. 01    | -7. 80303324  | 5. 38E-19    | ** |
| siR_180927 | 1. 5952   | 0. 01    | -7. 31759351  | 8. 99E-14    | ** |
| siR_180956 | 2. 4815   | 0. 01    | -7. 95506863  | 5. 01E-21    | ** |
| siR_180960 | 1. 0989   | 0. 01    | -6. 7799163   | 1. 04E-09    | ** |
| siR_180986 | 1. 2407   | 0. 01    | -6. 95501051  | 7. 17E-11    | ** |
| siR_181049 | 2. 7296   | 0. 01    | -8. 09254576  | 4. 66E-23    | ** |
| siR_181054 | 1. 2053   | 0. 01    | -6. 91324847  | 1. 40E-10    | ** |
| siR_181089 | 1. 1698   | 0. 01    | -6. 87011809  | 2. 73E-10    | ** |
| siR_18109  | 149. 3507 | 92. 3023 | -0. 6942655   | 4. 23E-83    |    |
| siR_18110  | 2. 2688   | 1. 7901  | -0. 34188925  | 0. 216088817 |    |
| siR_181103 | 3. 0132   | 0. 01    | -8. 23515263  | 2. 23E-25    | ** |
| siR_181163 | 1. 1698   | 0. 01    | -6. 87011809  | 2. 73E-10    | ** |
| siR_18118  | 584. 8179 | 209. 144 | -1. 48349086  | 0            | ** |
| siR_18119  | 9. 536    | 5. 4449  | -0. 80847868  | 2. 67E-08    |    |
| siR_18120  | 5. 3175   | 3. 9159  | -0. 4414042   | 0. 015775463 |    |
| siR_18121  | 0. 9217   | 1. 4172  | 0. 62067421   | 0. 089997715 |    |
| siR_181238 | 1. 2407   | 0. 01    | -6. 95501051  | 7. 17E-11    | ** |
| siR_18126  | 50. 3744  | 34. 3477 | -0. 55247725  | 5. 85E-20    |    |
| siR_18127  | 19. 5684  | 0. 634   | -4. 94789915  | 5. 55E-134   | ** |
| siR_181275 | 1. 5243   | 0. 01    | -7. 25200305  | 3. 42E-13    | ** |
| siR_18130  | 1. 1344   | 0. 2984  | -1. 92661     | 0. 000211792 | ** |
| siR_181300 | 1. 2053   | 0. 01    | -6. 91324847  | 1. 40E-10    | ** |
| siR_181318 | 4. 7857   | 0. 01    | -8. 90258614  | 6. 91E-40    | ** |
| siR_18137  | 0. 01     | 3. 0954  | 8. 27398204   | 1. 20E-26    | ** |
| siR_181371 | 1. 8079   | 0. 01    | -7. 49817107  | 1. 63E-15    | ** |
| siR_181410 | 1. 0635   | 0. 01    | -6. 73267622  | 2. 02E-09    | ** |
| siR_181476 | 1. 3116   | 0. 01    | -7. 035184    | 1. 88E-11    | ** |
| siR_181480 | 10. 954   | 0. 01    | -10. 09724211 | 2. 25E-90    | ** |
| siR_181516 | 1. 418    | 0. 01    | -7. 14771372  | 2. 54E-12    | ** |
| siR_181517 | 4. 2185   | 0. 01    | -8. 72058632  | 3. 03E-35    | ** |
| siR_181542 | 14. 5699  | 0. 01    | -10. 50877528 | 5. 70E-120   | ** |
| siR_181640 | 1. 9497   | 0. 01    | -7. 60710834  | 1. 13E-16    | ** |
| siR_18178  | 2. 0206   | 1. 0069  | -1. 00486334  | 0. 002256209 | ** |
| siR_181815 | 1. 9497   | 0. 01    | -7. 60710834  | 1. 13E-16    | ** |
| siR_181846 | 42. 15    | 0. 01    | -12. 04131706 | 0            | ** |
| siR_181873 | 1. 6307   | 0. 01    | -7. 34934759  | 4. 61E-14    | ** |
| siR_181885 | 1. 028    | 0. 01    | -6. 68369645  | 3. 95E-09    | ** |
| siR_18192  | 0. 01     | 1. 6409  | 7. 35834351   | 1. 79E-14    | ** |
| siR_181974 | 3. 0841   | 0. 01    | -8. 26870574  | 5. 85E-26    | ** |
| siR_181976 | 4. 9984   | 0. 01    | -8. 96532255  | 1. 25E-41    | ** |
| siR_182007 | 2. 3397   | 0. 01    | -7. 87017976  | 7. 25E-20    | ** |
| siR_182038 | 1. 0989   | 0. 01    | -6. 7799163   | 1. 04E-09    | ** |
| siR_182048 | 1. 2053   | 0. 01    | -6. 91324847  | 1. 40E-10    | ** |
| siR_182058 | 2. 5169   | 0. 01    | -7. 97550407  | 2. 57E-21    | ** |

|            |         |        |              |             |    |
|------------|---------|--------|--------------|-------------|----|
| siR_18209  | 1.6307  | 0.9696 | -0.75002979  | 0.032577757 |    |
| siR_182099 | 59.2369 | 0.01   | -12.53228039 | 0           | ** |
| siR_182105 | 27.4028 | 0.01   | -11.42010765 | 5.23E-225   | ** |
| siR_18212  | 2.7651  | 0.9696 | -1.51187005  | 8.22E-07    | ** |
| siR_18217  | 2.0561  | 0.7459 | -1.4628563   | 3.48E-05    | ** |
| siR_182189 | 3.1905  | 0.01   | -8.31763871  | 7.88E-27    | ** |
| siR_182226 | 3.4032  | 0.01   | -8.41074813  | 1.43E-28    | ** |
| siR_182430 | 1.1698  | 0.01   | -6.87011809  | 2.73E-10    | ** |
| siR_182466 | 1.8079  | 0.01   | -7.49817107  | 1.63E-15    | ** |
| siR_182526 | 1.028   | 0.01   | -6.68369645  | 3.95E-09    | ** |
| siR_182560 | 1.8788  | 0.01   | -7.55366769  | 4.29E-16    | ** |
| siR_182561 | 1.8434  | 0.01   | -7.52622535  | 8.37E-16    | ** |
| siR_182676 | 3.864   | 0.01   | -8.59395129  | 2.42E-32    | ** |
| siR_182683 | 2.7651  | 0.01   | -8.11118786  | 2.39E-23    | ** |
| siR_18288  | 2.5878  | 2.3122 | -0.16245993  | 0.517511236 |    |
| siR_18289  | 2.836   | 2.0139 | -0.49386548  | 0.05126528  |    |
| siR_18290  | 2.4815  | 1.6782 | -0.5642978   | 0.039765706 |    |
| siR_18291  | 1.1698  | 0.7832 | -0.57880922  | 0.151563912 |    |
| siR_182998 | 8.1535  | 0.01   | -9.67127563  | 1.88E-67    | ** |
| siR_183    | 0.01    | 1.7901 | 7.48389637   | 1.01E-15    | ** |
| siR_183111 | 1.737   | 0.01   | -7.44045394  | 6.21E-15    | ** |
| siR_183320 | 1.028   | 0.01   | -6.68369645  | 3.95E-09    | ** |
| siR_183379 | 1.418   | 0.01   | -7.14771372  | 2.54E-12    | ** |
| siR_18340  | 5.282   | 6.3773 | 0.27186145   | 0.092463586 |    |
| siR_18341  | 3.5095  | 2.9462 | -0.25241013  | 0.247476605 |    |
| siR_183521 | 2.7651  | 0.01   | -8.11118786  | 2.39E-23    | ** |
| siR_183748 | 1.0989  | 0.01   | -6.7799163   | 1.04E-09    | ** |
| siR_183860 | 2.5878  | 0.01   | -8.0155823   | 6.75E-22    | ** |
| siR_183863 | 1.3825  | 0.01   | -7.11113566  | 4.95E-12    | ** |
| siR_183865 | 23.0425 | 0.01   | -11.1700815  | 2.56E-189   | ** |
| siR_183883 | 1.2762  | 0.01   | -6.99571063  | 3.67E-11    | ** |
| siR_18395  | 1.418   | 1.529  | 0.10873087   | 0.733407941 |    |
| siR_18417  | 1.5952  | 0.6713 | -1.24870777  | 0.00126596  | ** |
| siR_18419  | 12.5493 | 4.7736 | -1.39445731  | 2.80E-23    | ** |
| siR_18420  | 2.8005  | 1.5663 | -0.83832386  | 0.001962838 |    |
| siR_184202 | 1.4534  | 0.01   | -7.18328801  | 1.30E-12    | ** |
| siR_184219 | 1.8434  | 0.01   | -7.52622535  | 8.37E-16    | ** |
| siR_184233 | 1.3825  | 0.01   | -7.11113566  | 4.95E-12    | ** |
| siR_184249 | 1.8434  | 0.01   | -7.52622535  | 8.37E-16    | ** |
| siR_18427  | 0.01    | 1.3426 | 7.06888574   | 5.63E-12    | ** |
| siR_184343 | 1.737   | 0.01   | -7.44045394  | 6.21E-15    | ** |
| siR_184371 | 1.9143  | 0.01   | -7.58067313  | 2.20E-16    | ** |
| siR_184372 | 1.8434  | 0.01   | -7.52622535  | 8.37E-16    | ** |
| siR_184482 | 4.9275  | 0.01   | -8.94471205  | 4.77E-41    | ** |
| siR_184539 | 1.2053  | 0.01   | -6.91324847  | 1.40E-10    | ** |
| siR_184590 | 8.4016  | 0.01   | -9.71452026  | 1.75E-69    | ** |
| siR_184668 | 1.3116  | 0.01   | -7.035184    | 1.88E-11    | ** |

|            |          |          |               |              |    |
|------------|----------|----------|---------------|--------------|----|
| siR_184683 | 2. 8714  | 0. 01    | -8. 16561052  | 3. 22E-24    | ** |
| siR_184768 | 1. 3116  | 0. 01    | -7. 035184    | 1. 88E-11    | ** |
| siR_18479  | 1. 3471  | 0. 5594  | -1. 26790479  | 0. 002777337 | ** |
| siR_184801 | 2. 9069  | 0. 01    | -8. 18333764  | 1. 65E-24    | ** |
| siR_184897 | 2. 3042  | 0. 01    | -7. 84812212  | 1. 41E-19    | ** |
| siR_184914 | 118. 97  | 0. 01    | -13. 53831027 | 0            | ** |
| siR_184915 | 1. 3471  | 0. 01    | -7. 07371314  | 9. 66E-12    | ** |
| siR_184926 | 16. 4488 | 0. 01    | -10. 68376659 | 2. 38E-135   | ** |
| siR_184927 | 1. 418   | 0. 01    | -7. 14771372  | 2. 54E-12    | ** |
| siR_18493  | 1. 8788  | 1. 1188  | -0. 74785934  | 0. 021928453 |    |
| siR_184982 | 1. 1698  | 0. 01    | -6. 87011809  | 2. 73E-10    | ** |
| siR_185034 | 1. 1344  | 0. 01    | -6. 82578563  | 5. 32E-10    | ** |
| siR_185075 | 1. 1344  | 0. 01    | -6. 82578563  | 5. 32E-10    | ** |
| siR_185083 | 1. 8434  | 0. 01    | -7. 52622535  | 8. 37E-16    | ** |
| siR_1851   | 1. 028   | 0. 7832  | -0. 39238759  | 0. 347659208 |    |
| siR_185108 | 4. 8921  | 0. 01    | -8. 93431011  | 9. 31E-41    | ** |
| siR_185114 | 2. 1979  | 0. 01    | -7. 77998195  | 1. 05E-18    | ** |
| siR_185155 | 1. 028   | 0. 01    | -6. 68369645  | 3. 95E-09    | ** |
| siR_18517  | 71. 9634 | 51. 0553 | -0. 49520262  | 4. 21E-23    |    |
| siR_185249 | 5. 2466  | 0. 01    | -9. 03523897  | 1. 17E-43    | ** |
| siR_185253 | 2. 4815  | 0. 01    | -7. 95506863  | 5. 01E-21    | ** |
| siR_185337 | 1. 2762  | 0. 01    | -6. 99571063  | 3. 67E-11    | ** |
| siR_185379 | 1. 4534  | 0. 01    | -7. 18328801  | 1. 30E-12    | ** |
| siR_185413 | 8. 4725  | 0. 01    | -9. 72664389  | 4. 60E-70    | ** |
| siR_185460 | 1. 5598  | 0. 01    | -7. 28521726  | 1. 75E-13    | ** |
| siR_185463 | 2. 9069  | 0. 01    | -8. 18333764  | 1. 65E-24    | ** |
| siR_185468 | 3. 0487  | 0. 01    | -8. 25205038  | 1. 14E-25    | ** |
| siR_185499 | 1. 9143  | 0. 01    | -7. 58067313  | 2. 20E-16    | ** |
| siR_185551 | 10. 5641 | 0. 01    | -10. 0449541  | 3. 50E-87    | ** |
| siR_185569 | 1. 2762  | 0. 01    | -6. 99571063  | 3. 67E-11    | ** |
| siR_185579 | 2. 6587  | 0. 01    | -8. 05457718  | 1. 77E-22    | ** |
| siR_185612 | 1. 4534  | 0. 01    | -7. 18328801  | 1. 30E-12    | ** |
| siR_185636 | 2. 4815  | 0. 01    | -7. 95506863  | 5. 01E-21    | ** |
| siR_185685 | 88. 3058 | 0. 01    | -13. 10829305 | 0            | ** |
| siR_185686 | 6. 7355  | 0. 01    | -9. 39564121  | 7. 60E-56    | ** |
| siR_185851 | 3. 2614  | 0. 01    | -8. 34934759  | 2. 07E-27    | ** |
| siR_185913 | 19. 0721 | 0. 01    | -10. 89724802 | 8. 04E-157   | ** |
| siR_185924 | 1. 2407  | 0. 01    | -6. 95501051  | 7. 17E-11    | ** |
| siR_185964 | 2. 3751  | 0. 01    | -7. 89184446  | 3. 72E-20    | ** |
| siR_186020 | 17. 2287 | 0. 01    | -10. 75059825 | 9. 86E-142   | ** |
| siR_186021 | 1. 2053  | 0. 01    | -6. 91324847  | 1. 40E-10    | ** |
| siR_18610  | 0. 01    | 4. 1396  | 8. 69334756   | 2. 17E-35    | ** |
| siR_186200 | 1. 0989  | 0. 01    | -6. 7799163   | 1. 04E-09    | ** |
| siR_186215 | 2. 7651  | 0. 01    | -8. 11118786  | 2. 39E-23    | ** |
| siR_186218 | 10. 6704 | 0. 01    | -10. 05939853 | 4. 71E-88    | ** |
| siR_186219 | 4. 8566  | 0. 01    | -8. 92380283  | 1. 82E-40    | ** |
| siR_186227 | 1. 2407  | 0. 01    | -6. 95501051  | 7. 17E-11    | ** |

|            |          |          |              |             |    |
|------------|----------|----------|--------------|-------------|----|
| siR_186229 | 20.5255  | 0.01     | -11.0032015  | 1.02E-168   | ** |
| siR_186241 | 3.4032   | 0.01     | -8.41074813  | 1.43E-28    | ** |
| siR_186242 | 2.127    | 0.01     | -7.73267621  | 3.99E-18    | ** |
| siR_186253 | 313.3421 | 0.01     | -14.93545103 | 0           | ** |
| siR_186265 | 1.4889   | 0.01     | -7.21810305  | 6.67E-13    | ** |
| siR_186269 | 6.5582   | 0.01     | -9.35715612  | 2.15E-54    | ** |
| siR_186270 | 4.5376   | 0.01     | -8.82578561  | 7.42E-38    | ** |
| siR_186290 | 1.2407   | 0.01     | -6.95501051  | 7.17E-11    | ** |
| siR_18630  | 13.0101  | 4.1023   | -1.66512715  | 9.19E-31    | ** |
| siR_18631  | 6.2746   | 1.3426   | -2.22449394  | 3.06E-22    | ** |
| siR_186313 | 1.737    | 0.01     | -7.44045394  | 6.21E-15    | ** |
| siR_186335 | 3.4032   | 0.01     | -8.41074813  | 1.43E-28    | ** |
| siR_186353 | 16.626   | 0.01     | -10.69922536 | 8.44E-137   | ** |
| siR_186373 | 7.3027   | 0.01     | -9.5122862   | 1.73E-60    | ** |
| siR_186379 | 11.4858  | 0.01     | -10.16563558 | 9.99E-95    | ** |
| siR_186404 | 6.0619   | 0.01     | -9.24362624  | 2.48E-50    | ** |
| siR_186518 | 1.9852   | 0.01     | -7.63314056  | 5.78E-17    | ** |
| siR_186523 | 2.5878   | 0.01     | -8.0155823   | 6.75E-22    | ** |
| siR_186543 | 1.737    | 0.01     | -7.44045394  | 6.21E-15    | ** |
| siR_186562 | 5.6365   | 0.01     | -9.13865581  | 7.51E-47    | ** |
| siR_186566 | 84.7608  | 0.01     | -13.04918107 | 0           | ** |
| siR_186567 | 25.1695  | 0.01     | -11.29746071 | 9.96E-207   | ** |
| siR_186568 | 2.6942   | 0.01     | -8.07371315  | 9.10E-23    | ** |
| siR_18658  | 1.4534   | 0.5594   | -1.37747965  | 0.000918153 | ** |
| siR_186586 | 3.1905   | 0.01     | -8.31763871  | 7.88E-27    | ** |
| siR_18659  | 0.01     | 1.8274   | 7.51364865   | 4.92E-16    | ** |
| siR_186596 | 1.4889   | 0.01     | -7.21810305  | 6.67E-13    | ** |
| siR_186597 | 1.3471   | 0.01     | -7.07371314  | 9.66E-12    | ** |
| siR_1866   | 0.01     | 1.529    | 7.2564446    | 1.55E-13    | ** |
| siR_186602 | 5.8138   | 0.01     | -9.18333764  | 2.66E-48    | ** |
| siR_186635 | 1.1344   | 0.01     | -6.82578563  | 5.32E-10    | ** |
| siR_18664  | 209.0129 | 198.1796 | -0.07678352  | 0.004887038 |    |
| siR_186688 | 2.127    | 0.01     | -7.73267621  | 3.99E-18    | ** |
| siR_18670  | 0.01     | 3.2073   | 8.32521549   | 1.38E-27    | ** |
| siR_186707 | 1.028    | 0.01     | -6.68369645  | 3.95E-09    | ** |
| siR_186712 | 3.1196   | 0.01     | -8.28521723  | 3.00E-26    | ** |
| siR_186713 | 1.418    | 0.01     | -7.14771372  | 2.54E-12    | ** |
| siR_186727 | 2.8714   | 0.01     | -8.16561052  | 3.22E-24    | ** |
| siR_18677  | 2.836    | 3.9531   | 0.47912692   | 0.024434673 |    |
| siR_18680  | 0.01     | 3.2819   | 8.35838747   | 3.29E-28    | ** |
| siR_186848 | 2.7296   | 0.01     | -8.09254576  | 4.66E-23    | ** |
| siR_186851 | 1.0635   | 0.01     | -6.73267622  | 2.02E-09    | ** |
| siR_186853 | 1.9852   | 0.01     | -7.63314056  | 5.78E-17    | ** |
| siR_186859 | 4.254    | 0.01     | -8.73267624  | 1.56E-35    | ** |
| siR_186886 | 1.418    | 0.01     | -7.14771372  | 2.54E-12    | ** |
| siR_186887 | 1.3825   | 0.01     | -7.11113566  | 4.95E-12    | ** |
| siR_186927 | 2.3397   | 0.01     | -7.87017976  | 7.25E-20    | ** |

|            |         |        |              |               |    |
|------------|---------|--------|--------------|---------------|----|
| siR_187004 | 2.2688  | 0.01   | -7.82578561  | 2.76E-19      | ** |
| siR_187029 | 5.4947  | 0.01   | -9.10189688  | 1.09E-45      | ** |
| siR_187085 | 1.8434  | 0.01   | -7.52622535  | 8.37E-16      | ** |
| siR_187250 | 38.8886 | 0.01   | -11.9251314  | 075360161904e | ** |
| siR_187257 | 1.0635  | 0.01   | -6.73267622  | 2.02E-09      | ** |
| siR_18726  | 0.01    | 2.9089 | 8.18432989   | 4.35E-25      | ** |
| siR_18731  | 0.01    | 1.3053 | 7.02823761   | 1.15E-11      | ** |
| siR_18732  | 0.01    | 1.3799 | 7.10841991   | 2.74E-12      | ** |
| siR_187385 | 3.0487  | 0.01   | -8.25205038  | 1.14E-25      | ** |
| siR_187397 | 1.3471  | 0.01   | -7.07371314  | 9.66E-12      | ** |
| siR_18749  | 1.3471  | 0.3729 | -1.85299625  | 8.02E-05      | ** |
| siR_187529 | 4.7857  | 0.01   | -8.90258614  | 6.91E-40      | ** |
| siR_187532 | 1.8079  | 0.01   | -7.49817107  | 1.63E-15      | ** |
| siR_187553 | 4.1122  | 0.01   | -8.68376664  | 2.25E-34      | ** |
| siR_187617 | 3.2968  | 0.01   | -8.36492254  | 1.06E-27      | ** |
| siR_187660 | 8.8979  | 0.01   | -9.79732106  | 1.52E-73      | ** |
| siR_187684 | 9.536   | 0.01   | -9.89724045  | 9.08E-79      | ** |
| siR_187691 | 3.8995  | 0.01   | -8.60714536  | 1.24E-32      | ** |
| siR_187697 | 2.1979  | 0.01   | -7.77998195  | 1.05E-18      | ** |
| siR_187775 | 16.2715 | 0.01   | -10.66813151 | 6.73E-134     | ** |
| siR_187780 | 7.4445  | 0.01   | -9.5400311   | 1.20E-61      | ** |
| siR_187788 | 1.0635  | 0.01   | -6.73267622  | 2.02E-09      | ** |
| siR_187870 | 16.3779 | 0.01   | -10.67753464 | 9.07E-135     | ** |
| siR_18789  | 2.4815  | 1.268  | -0.96865771  | 0.001006513   |    |
| siR_187903 | 26.1621 | 0.01   | -11.35326268 | 7.48E-215     | ** |
| siR_187904 | 2.4815  | 0.01   | -7.95506863  | 5.01E-21      | ** |
| siR_187917 | 1.2762  | 0.01   | -6.99571063  | 3.67E-11      | ** |
| siR_187952 | 12.3366 | 0.01   | -10.26872915 | 1.09E-101     | ** |
| siR_187987 | 9.6069  | 0.01   | -9.90792717  | 2.39E-79      | ** |
| siR_187995 | 15.3853 | 0.01   | -10.58733681 | 1.21E-126     | ** |
| siR_187998 | 5.1402  | 0.01   | -9.00568068  | 8.67E-43      | ** |
| siR_188    | 0.01    | 1.3799 | 7.10841991   | 2.74E-12      | ** |
| siR_188030 | 3.3323  | 0.01   | -8.38037447  | 5.44E-28      | ** |
| siR_188037 | 18.6821 | 0.01   | -10.867441   | 1.25E-153     | ** |
| siR_188044 | 2.7296  | 0.01   | -8.09254576  | 4.66E-23      | ** |
| siR_188060 | 3.1905  | 0.01   | -8.31763871  | 7.88E-27      | ** |
| siR_188068 | 1.2407  | 0.01   | -6.95501051  | 7.17E-11      | ** |
| siR_188079 | 1.2407  | 0.01   | -6.95501051  | 7.17E-11      | ** |
| siR_188083 | 1.4889  | 0.01   | -7.21810305  | 6.67E-13      | ** |
| siR_188119 | 1.5952  | 0.01   | -7.31759351  | 8.99E-14      | ** |
| siR_188134 | 1.2407  | 0.01   | -6.95501051  | 7.17E-11      | ** |
| siR_188159 | 33.7129 | 0.01   | -11.71908483 | 1.17E-276     | ** |
| siR_188166 | 3.6868  | 0.01   | -8.52622535  | 6.83E-31      | ** |
| siR_188212 | 1.2407  | 0.01   | -6.95501051  | 7.17E-11      | ** |
| siR_188278 | 49.5236 | 0.01   | -12.2739007  | 0             | ** |
| siR_188279 | 1.2407  | 0.01   | -6.95501051  | 7.17E-11      | ** |
| siR_188310 | 2.0915  | 0.01   | -7.70839418  | 7.79E-18      | ** |

|            |         |        |              |             |    |
|------------|---------|--------|--------------|-------------|----|
| siR_188311 | 29.4235 | 0.01   | -11.52275313 | 1.51E-241   | ** |
| siR_18832  | 1.2053  | 0.3729 | -1.69253158  | 0.000467353 | ** |
| siR_18833  | 1.8079  | 2.0139 | 0.15567717   | 0.580398095 |    |
| siR_188337 | 1.6661  | 0.01   | -7.38033118  | 2.36E-14    | ** |
| siR_188391 | 3.2614  | 0.01   | -8.34934759  | 2.07E-27    | ** |
| siR_188393 | 1.1698  | 0.01   | -6.87011809  | 2.73E-10    | ** |
| siR_18843  | 0.01    | 1.529  | 7.2564446    | 1.55E-13    | ** |
| siR_188461 | 3.6159  | 0.01   | -8.49821097  | 2.60E-30    | ** |
| siR_188472 | 3.1905  | 0.01   | -8.31763871  | 7.88E-27    | ** |
| siR_188475 | 1.1344  | 0.01   | -6.82578563  | 5.32E-10    | ** |
| siR_188477 | 10.4577 | 0.01   | -10.03034988 | 2.59E-86    | ** |
| siR_188482 | 9.8196  | 0.01   | -9.93952048  | 4.33E-81    | ** |
| siR_188488 | 1.8434  | 0.01   | -7.52622535  | 8.37E-16    | ** |
| siR_188542 | 2.8005  | 0.01   | -8.12954063  | 1.23E-23    | ** |
| siR_188557 | 3.6868  | 0.01   | -8.52622535  | 6.83E-31    | ** |
| siR_188561 | 52.4305 | 0.01   | -12.35619043 | 0           | ** |
| siR_188578 | 1.2762  | 0.01   | -6.99571063  | 3.67E-11    | ** |
| siR_18858  | 1.1344  | 0.1492 | -2.92661     | 2.25E-06    | ** |
| siR_18859  | 5.4947  | 2.2376 | -1.29608856  | 5.39E-10    | ** |
| siR_18861  | 1.1344  | 0.2984 | -1.92661     | 0.000211792 | ** |
| siR_188619 | 1.4889  | 0.01   | -7.21810305  | 6.67E-13    | ** |
| siR_188671 | 1.9143  | 0.01   | -7.58067313  | 2.20E-16    | ** |
| siR_188696 | 1.7016  | 0.01   | -7.41074813  | 1.21E-14    | ** |
| siR_188731 | 1.6661  | 0.01   | -7.38033118  | 2.36E-14    | ** |
| siR_18877  | 1.028   | 0.2611 | -1.9771659   | 0.000342937 | ** |
| siR_18879  | 1.2053  | 0.1119 | -3.42911034  | 1.49E-07    | ** |
| siR_188811 | 1.2762  | 0.01   | -6.99571063  | 3.67E-11    | ** |
| siR_188812 | 1.5598  | 0.01   | -7.28521726  | 1.75E-13    | ** |
| siR_188836 | 47.0066 | 0.01   | -12.19864751 | 0           | ** |
| siR_188887 | 3.0487  | 0.01   | -8.25205038  | 1.14E-25    | ** |
| siR_188905 | 5.8492  | 0.01   | -9.19209551  | 1.36E-48    | ** |
| siR_188927 | 1.0635  | 0.01   | -6.73267622  | 2.02E-09    | ** |
| siR_188964 | 15.3498 | 0.01   | -10.58400411 | 2.36E-126   | ** |
| siR_189074 | 1.2762  | 0.01   | -6.99571063  | 3.67E-11    | ** |
| siR_189101 | 2.6587  | 0.01   | -8.05457718  | 1.77E-22    | ** |
| siR_18912  | 2.127   | 0.7086 | -1.58577666  | 7.89E-06    | ** |
| siR_18913  | 2.5878  | 0.7459 | -1.79467199  | 7.17E-08    | ** |
| siR_18915  | 3.1196  | 2.1258 | -0.55335519  | 0.023309324 |    |
| siR_189151 | 1.2407  | 0.01   | -6.95501051  | 7.17E-11    | ** |
| siR_189154 | 2.0915  | 0.01   | -7.70839418  | 7.79E-18    | ** |
| siR_189169 | 3.1196  | 0.01   | -8.28521723  | 3.00E-26    | ** |
| siR_189235 | 1.6661  | 0.01   | -7.38033118  | 2.36E-14    | ** |
| siR_189242 | 2.0206  | 0.01   | -7.65863995  | 2.96E-17    | ** |
| siR_189249 | 1.3825  | 0.01   | -7.11113566  | 4.95E-12    | ** |
| siR_189300 | 5.2111  | 0.01   | -9.02544416  | 2.28E-43    | ** |
| siR_189308 | 57.8898 | 0.01   | -12.49909348 | 0           | ** |
| siR_189309 | 55.4437 | 0.01   | -12.43680817 | 0           | ** |

|            |         |        |             |             |    |
|------------|---------|--------|-------------|-------------|----|
| siR_189312 | 2.4815  | 0.01   | -7.95506863 | 5.01E-21    | ** |
| siR_189318 | 1.6307  | 0.01   | -7.34934759 | 4.61E-14    | ** |
| siR_18933  | 0.01    | 1.1188 | 6.80580835  | 4.20E-10    | ** |
| siR_189428 | 1.0989  | 0.01   | -6.7799163  | 1.04E-09    | ** |
| siR_189442 | 1.2053  | 0.01   | -6.91324847 | 1.40E-10    | ** |
| siR_189457 | 1.3471  | 0.01   | -7.07371314 | 9.66E-12    | ** |
| siR_1895   | 0.01    | 1.9393 | 7.59939219  | 5.69E-17    | ** |
| siR_189541 | 1.1698  | 0.01   | -6.87011809 | 2.73E-10    | ** |
| siR_189543 | 1.8079  | 0.01   | -7.49817107 | 1.63E-15    | ** |
| siR_189562 | 2.127   | 0.01   | -7.73267621 | 3.99E-18    | ** |
| siR_18960  | 1.6307  | 2.163  | 0.40754227  | 0.15225934  |    |
| siR_189602 | 3.9704  | 0.01   | -8.63314056 | 3.26E-33    | ** |
| siR_189728 | 9.6424  | 0.01   | -9.91324847 | 1.22E-79    | ** |
| siR_189862 | 3.7577  | 0.01   | -8.5537061  | 1.79E-31    | ** |
| siR_18990  | 0.8153  | 1.1188 | 0.45654924  | 0.254552852 |    |
| siR_189919 | 1.9497  | 0.01   | -7.60710834 | 1.13E-16    | ** |
| siR_190033 | 2.5169  | 0.01   | -7.97550407 | 2.57E-21    | ** |
| siR_190046 | 1.7725  | 0.01   | -7.46964183 | 3.18E-15    | ** |
| siR_190057 | 1.2053  | 0.01   | -6.91324847 | 1.40E-10    | ** |
| siR_190061 | 6.6646  | 0.01   | -9.38037452 | 2.89E-55    | ** |
| siR_190062 | 2.2688  | 0.01   | -7.82578561 | 2.76E-19    | ** |
| siR_190063 | 1.5952  | 0.01   | -7.31759351 | 8.99E-14    | ** |
| siR_190064 | 1.028   | 0.01   | -6.68369645 | 3.95E-09    | ** |
| siR_190091 | 1.2407  | 0.01   | -6.95501051 | 7.17E-11    | ** |
| siR_190128 | 1.2053  | 0.01   | -6.91324847 | 1.40E-10    | ** |
| siR_190149 | 5.6011  | 0.01   | -9.12956637 | 1.46E-46    | ** |
| siR_190150 | 1.4534  | 0.01   | -7.18328801 | 1.30E-12    | ** |
| siR_190186 | 6.0619  | 0.01   | -9.24362624 | 2.48E-50    | ** |
| siR_190187 | 5.3884  | 0.01   | -9.07371312 | 8.07E-45    | ** |
| siR_190188 | 1.6307  | 0.01   | -7.34934759 | 4.61E-14    | ** |
| siR_190197 | 11.0604 | 0.01   | -10.1111879 | 3.03E-91    | ** |
| siR_190198 | 1.6307  | 0.01   | -7.34934759 | 4.61E-14    | ** |
| siR_190209 | 1.6307  | 0.01   | -7.34934759 | 4.61E-14    | ** |
| siR_190210 | 1.4534  | 0.01   | -7.18328801 | 1.30E-12    | ** |
| siR_190219 | 3.545   | 0.01   | -8.4696418  | 9.89E-30    | ** |
| siR_190220 | 1.1698  | 0.01   | -6.87011809 | 2.73E-10    | ** |
| siR_190221 | 1.0989  | 0.01   | -6.7799163  | 1.04E-09    | ** |
| siR_190231 | 2.3042  | 0.01   | -7.84812212 | 1.41E-19    | ** |
| siR_190240 | 1.3825  | 0.01   | -7.11113566 | 4.95E-12    | ** |
| siR_190275 | 1.3825  | 0.01   | -7.11113566 | 4.95E-12    | ** |
| siR_190296 | 1.9852  | 0.01   | -7.63314056 | 5.78E-17    | ** |
| siR_190340 | 2.9778  | 0.01   | -8.21810305 | 4.34E-25    | ** |
| siR_19036  | 0.01    | 3.0208 | 8.23878686  | 5.04E-26    | ** |
| siR_190385 | 1.2053  | 0.01   | -6.91324847 | 1.40E-10    | ** |
| siR_190419 | 1.737   | 0.01   | -7.44045394 | 6.21E-15    | ** |
| siR_190452 | 2.0561  | 0.01   | -7.68376661 | 1.52E-17    | ** |
| siR_190455 | 6.381   | 0.01   | -9.31763871 | 6.06E-53    | ** |



|            |          |        |              |             |    |
|------------|----------|--------|--------------|-------------|----|
| siR_190505 | 4.2894   | 0.01   | -8.74463204  | 7.97E-36    | ** |
| siR_190521 | 2.2333   | 0.01   | -7.80303324  | 5.38E-19    | ** |
| siR_19056  | 12.7265  | 6.3773 | -0.99681805  | 1.74E-14    |    |
| siR_190567 | 1.4534   | 0.01   | -7.18328801  | 1.30E-12    | ** |
| siR_190579 | 1.5243   | 0.01   | -7.25200305  | 3.42E-13    | ** |
| siR_19060  | 1.2762   | 0.9323 | -0.45298827  | 0.230550336 |    |
| siR_19061  | 0.01     | 1.4545 | 7.18437949   | 6.51E-13    | ** |
| siR_19062  | 1.7016   | 0.4475 | -1.92693235  | 5.01E-06    | ** |
| siR_190648 | 2.1979   | 0.01   | -7.77998195  | 1.05E-18    | ** |
| siR_190674 | 9.8905   | 0.01   | -9.94989969  | 1.14E-81    | ** |
| siR_190676 | 1.737    | 0.01   | -7.44045394  | 6.21E-15    | ** |
| siR_190694 | 2.9778   | 0.01   | -8.21810305  | 4.34E-25    | ** |
| siR_190699 | 19.7811  | 0.01   | -10.94990682 | 1.27E-162   | ** |
| siR_190770 | 1.028    | 0.01   | -6.68369645  | 3.95E-09    | ** |
| siR_190816 | 1.028    | 0.01   | -6.68369645  | 3.95E-09    | ** |
| siR_190858 | 1.8788   | 0.01   | -7.55366769  | 4.29E-16    | ** |
| siR_190877 | 1.2762   | 0.01   | -6.99571063  | 3.67E-11    | ** |
| siR_190887 | 1.5598   | 0.01   | -7.28521726  | 1.75E-13    | ** |
| siR_190928 | 1.1698   | 0.01   | -6.87011809  | 2.73E-10    | ** |
| siR_19093  | 1.5952   | 0.3356 | -2.24892269  | 1.10E-06    | ** |
| siR_19094  | 0.01     | 3.8413 | 8.58545083   | 6.83E-33    | ** |
| siR_190941 | 1.6307   | 0.01   | -7.34934759  | 4.61E-14    | ** |
| siR_190943 | 1.0989   | 0.01   | -6.7799163   | 1.04E-09    | ** |
| siR_19095  | 0.01     | 1.3426 | 7.06888574   | 5.63E-12    | ** |
| siR_190967 | 1.2053   | 0.01   | -6.91324847  | 1.40E-10    | ** |
| siR_190969 | 109.9303 | 0.01   | -13.42430196 | 0           | ** |
| siR_190982 | 12.8683  | 0.01   | -10.32960581 | 4.82E-106   | ** |
| siR_19099  | 0.01     | 5.3703 | 9.06885887   | 1.08E-45    | ** |
| siR_190990 | 78.3089  | 0.01   | -12.93496063 | 0           | ** |
| siR_191023 | 1.7016   | 0.01   | -7.41074813  | 1.21E-14    | ** |
| siR_191038 | 1.5598   | 0.01   | -7.28521726  | 1.75E-13    | ** |
| siR_191053 | 1.2053   | 0.01   | -6.91324847  | 1.40E-10    | ** |
| siR_19107  | 0.01     | 2.7597 | 8.10836763   | 7.72E-24    | ** |
| siR_191074 | 2.0915   | 0.01   | -7.70839418  | 7.79E-18    | ** |
| siR_191121 | 5.9201   | 0.01   | -9.2094777   | 3.58E-49    | ** |
| siR_191139 | 1.1344   | 0.01   | -6.82578563  | 5.32E-10    | ** |
| siR_191155 | 1.8788   | 0.01   | -7.55366769  | 4.29E-16    | ** |
| siR_191159 | 1.2053   | 0.01   | -6.91324847  | 1.40E-10    | ** |
| siR_191191 | 2.2333   | 0.01   | -7.80303324  | 5.38E-19    | ** |
| siR_191192 | 1.418    | 0.01   | -7.14771372  | 2.54E-12    | ** |
| siR_191198 | 1.6661   | 0.01   | -7.38033118  | 2.36E-14    | ** |
| siR_19120  | 1.3116   | 0.7459 | -0.81427367  | 0.04007629  |    |
| siR_191203 | 5.3175   | 0.01   | -9.0546043   | 3.07E-44    | ** |
| siR_191237 | 1.4534   | 0.01   | -7.18328801  | 1.30E-12    | ** |
| siR_191247 | 1.2407   | 0.01   | -6.95501051  | 7.17E-11    | ** |
| siR_191250 | 26.3393  | 0.01   | -11.36300133 | 2.65E-216   | ** |
| siR_191264 | 1.9852   | 0.01   | -7.63314056  | 5.78E-17    | ** |

|            |         |        |             |             |    |
|------------|---------|--------|-------------|-------------|----|
| siR_191282 | 6.5937  | 0.01   | -9.36494442 | 1.10E-54    | ** |
| siR_191283 | 1.5243  | 0.01   | -7.25200305 | 3.42E-13    | ** |
| siR_191303 | 3.2259  | 0.01   | -8.33355791 | 4.04E-27    | ** |
| siR_191321 | 4.0413  | 0.01   | -8.65867564 | 8.57E-34    | ** |
| siR_191335 | 2.836   | 0.01   | -8.14771372 | 6.28E-24    | ** |
| siR_191353 | 1.3116  | 0.01   | -7.035184   | 1.88E-11    | ** |
| siR_19136  | 4.254   | 2.3495 | -0.85646627 | 9.88E-05    |    |
| siR_191362 | 2.5169  | 0.01   | -7.97550407 | 2.57E-21    | ** |
| siR_191363 | 1.7016  | 0.01   | -7.41074813 | 1.21E-14    | ** |
| siR_191384 | 12.4075 | 0.01   | -10.2769968 | 2.85E-102   | ** |
| siR_191439 | 2.2333  | 0.01   | -7.80303324 | 5.38E-19    | ** |
| siR_191446 | 1.1698  | 0.01   | -6.87011809 | 2.73E-10    | ** |
| siR_19148  | 0.01    | 4.1023 | 8.68028919  | 4.46E-35    | ** |
| siR_19152  | 0.01    | 7.235  | 9.49884921  | 2.67E-61    | ** |
| siR_19159  | 1.4889  | 0.8205 | -0.85967162 | 0.021777219 |    |
| siR_191638 | 1.737   | 0.01   | -7.44045394 | 6.21E-15    | ** |
| siR_191646 | 6.7355  | 0.01   | -9.39564121 | 7.60E-56    | ** |
| siR_191649 | 6.3101  | 0.01   | -9.30151909 | 2.30E-52    | ** |
| siR_191713 | 3.3323  | 0.01   | -8.38037447 | 5.44E-28    | ** |
| siR_191773 | 2.5524  | 0.01   | -7.99571063 | 1.32E-21    | ** |
| siR_191786 | 1.4534  | 0.01   | -7.18328801 | 1.30E-12    | ** |
| siR_191792 | 2.9778  | 0.01   | -8.21810305 | 4.34E-25    | ** |
| siR_19180  | 1.737   | 1.3053 | -0.41221633 | 0.198218358 |    |
| siR_19182  | 1.2053  | 0.8951 | -0.42927151 | 0.267810892 |    |
| siR_191823 | 1.3471  | 0.01   | -7.07371314 | 9.66E-12    | ** |
| siR_191830 | 1.4534  | 0.01   | -7.18328801 | 1.30E-12    | ** |
| siR_191848 | 2.0561  | 0.01   | -7.68376661 | 1.52E-17    | ** |
| siR_191859 | 3.6868  | 0.01   | -8.52622535 | 6.83E-31    | ** |
| siR_191917 | 1.5598  | 0.01   | -7.28521726 | 1.75E-13    | ** |
| siR_191935 | 2.836   | 0.01   | -8.14771372 | 6.28E-24    | ** |
| siR_19195  | 1.028   | 0.8951 | -0.19971949 | 0.622135026 |    |
| siR_19197  | 1.2053  | 0.8951 | -0.42927151 | 0.267810892 |    |
| siR_191999 | 17.725  | 0.01   | -10.7915699 | 8.54E-146   | ** |
| siR_192057 | 9.8196  | 0.01   | -9.93952048 | 4.33E-81    | ** |
| siR_192059 | 2.1979  | 0.01   | -7.77998195 | 1.05E-18    | ** |
| siR_192067 | 9.6424  | 0.01   | -9.91324847 | 1.22E-79    | ** |
| siR_19207  | 0.01    | 6.3027 | 9.29982618  | 1.70E-53    | ** |
| siR_19208  | 0.01    | 2.9089 | 8.18432989  | 4.35E-25    | ** |
| siR_192102 | 23.8224 | 0.01   | -11.218103  | 1.06E-195   | ** |
| siR_192213 | 1.6307  | 0.01   | -7.34934759 | 4.61E-14    | ** |
| siR_19225  | 0.01    | 1.1188 | 6.80580835  | 4.20E-10    | ** |
| siR_192257 | 1.4534  | 0.01   | -7.18328801 | 1.30E-12    | ** |
| siR_192279 | 1.1344  | 0.01   | -6.82578563 | 5.32E-10    | ** |
| siR_192283 | 4.4312  | 0.01   | -8.79155366 | 5.51E-37    | ** |
| siR_192302 | 1.8788  | 0.01   | -7.55366769 | 4.29E-16    | ** |
| siR_1925   | 1.0989  | 0.3729 | -1.5591994  | 0.001653799 | ** |
| siR_192502 | 6.9836  | 0.01   | -9.44782715 | 7.07E-58    | ** |

|            |          |          |               |              |    |
|------------|----------|----------|---------------|--------------|----|
| siR_192564 | 2. 1979  | 0. 01    | -7. 77998195  | 1. 05E-18    | ** |
| siR_19257  | 0. 01    | 2. 4987  | 7. 96503389   | 1. 18E-21    | ** |
| siR_192614 | 1. 4889  | 0. 01    | -7. 21810305  | 6. 67E-13    | ** |
| siR_192677 | 1. 028   | 0. 01    | -6. 68369645  | 3. 95E-09    | ** |
| siR_192688 | 1. 8434  | 0. 01    | -7. 52622535  | 8. 37E-16    | ** |
| siR_192718 | 29. 5653 | 0. 01    | -11. 52968941 | 1. 04E-242   | ** |
| siR_192778 | 3. 9704  | 0. 01    | -8. 63314056  | 3. 26E-33    | ** |
| siR_192811 | 1. 6307  | 0. 01    | -7. 34934759  | 4. 61E-14    | ** |
| siR_192820 | 1. 0989  | 0. 01    | -6. 7799163   | 1. 04E-09    | ** |
| siR_192853 | 1. 5598  | 0. 01    | -7. 28521726  | 1. 75E-13    | ** |
| siR_192970 | 1. 1698  | 0. 01    | -6. 87011809  | 2. 73E-10    | ** |
| siR_19299  | 10. 954  | 5. 7433  | -0. 93150596  | 1. 78E-11    |    |
| siR_19305  | 1. 028   | 0. 8951  | -0. 19971949  | 0. 622135026 |    |
| siR_1934   | 0. 01    | 2. 4987  | 7. 96503389   | 1. 18E-21    | ** |
| siR_193475 | 4. 1831  | 0. 01    | -8. 70842867  | 5. 92E-35    | ** |
| siR_19350  | 1. 3471  | 0. 8951  | -0. 58973618  | 0. 116948474 |    |
| siR_193534 | 4. 4312  | 0. 01    | -8. 79155366  | 5. 51E-37    | ** |
| siR_193551 | 1. 3825  | 0. 01    | -7. 11113566  | 4. 95E-12    | ** |
| siR_193573 | 1. 2053  | 0. 01    | -6. 91324847  | 1. 40E-10    | ** |
| siR_19367  | 1. 3116  | 0. 2238  | -2. 55104587  | 2. 11E-06    | ** |
| siR_193689 | 1. 418   | 0. 01    | -7. 14771372  | 2. 54E-12    | ** |
| siR_19379  | 0. 01    | 1. 0815  | 6. 75688986   | 8. 62E-10    | ** |
| siR_193828 | 3. 3677  | 0. 01    | -8. 39561983  | 2. 79E-28    | ** |
| siR_1939   | 1. 2053  | 0. 5221  | -1. 20699422  | 0. 006557539 | ** |
| siR_19392  | 1. 3825  | 0. 1865  | -2. 89003194  | 1. 90E-07    | ** |
| siR_193951 | 1. 1698  | 0. 01    | -6. 87011809  | 2. 73E-10    | ** |
| siR_193983 | 32. 224  | 0. 01    | -11. 6539199  | 1. 81E-264   | ** |
| siR_194    | 0. 01    | 24. 0918 | 11. 23432647  | 2. 09E-202   | ** |
| siR_1940   | 1. 8079  | 0. 3356  | -2. 42950026  | 5. 31E-08    | ** |
| siR_194022 | 4. 6439  | 0. 01    | -8. 85919308  | 1. 00E-38    | ** |
| siR_194028 | 1. 028   | 0. 01    | -6. 68369645  | 3. 95E-09    | ** |
| siR_194033 | 7. 2672  | 0. 01    | -9. 5052558   | 3. 38E-60    | ** |
| siR_194034 | 3. 6513  | 0. 01    | -8. 51226639  | 1. 33E-30    | ** |
| siR_194035 | 1. 0635  | 0. 01    | -6. 73267622  | 2. 02E-09    | ** |
| siR_19412  | 0. 01    | 1. 3053  | 7. 02823761   | 1. 15E-11    | ** |
| siR_194248 | 1. 028   | 0. 01    | -6. 68369645  | 3. 95E-09    | ** |
| siR_194285 | 2. 5878  | 0. 01    | -8. 0155823   | 6. 75E-22    | ** |
| siR_194299 | 1. 7016  | 0. 01    | -7. 41074813  | 1. 21E-14    | ** |
| siR_194389 | 1. 0989  | 0. 01    | -6. 7799163   | 1. 04E-09    | ** |
| siR_194462 | 5. 9201  | 0. 01    | -9. 2094777   | 3. 58E-49    | ** |
| siR_194535 | 1. 2053  | 0. 01    | -6. 91324847  | 1. 40E-10    | ** |
| siR_194549 | 3. 9704  | 0. 01    | -8. 63314056  | 3. 26E-33    | ** |
| siR_194654 | 1. 0989  | 0. 01    | -6. 7799163   | 1. 04E-09    | ** |
| siR_194688 | 1. 3471  | 0. 01    | -7. 07371314  | 9. 66E-12    | ** |
| siR_194705 | 3. 6159  | 0. 01    | -8. 49821097  | 2. 60E-30    | ** |
| siR_194744 | 1. 7725  | 0. 01    | -7. 46964183  | 3. 18E-15    | ** |
| siR_194755 | 15. 9525 | 0. 01    | -10. 6395668  | 2. 75E-131   | ** |

|            |         |        |              |           |    |
|------------|---------|--------|--------------|-----------|----|
| siR_194756 | 5.0339  | 0.01   | -8.97553276  | 6.43E-42  | ** |
| siR_194757 | 1.2407  | 0.01   | -6.95501051  | 7.17E-11  | ** |
| siR_194766 | 8.2598  | 0.01   | -9.689963    | 2.53E-68  | ** |
| siR_194767 | 6.7     | 0.01   | -9.3880173   | 1.48E-55  | ** |
| siR_194768 | 6.3101  | 0.01   | -9.30151909  | 2.30E-52  | ** |
| siR_194769 | 3.6868  | 0.01   | -8.52622535  | 6.83E-31  | ** |
| siR_194770 | 3.2968  | 0.01   | -8.36492254  | 1.06E-27  | ** |
| siR_194771 | 2.1624  | 0.01   | -7.75648961  | 2.05E-18  | ** |
| siR_194772 | 1.8434  | 0.01   | -7.52622535  | 8.37E-16  | ** |
| siR_194773 | 1.7725  | 0.01   | -7.46964183  | 3.18E-15  | ** |
| siR_194774 | 1.1698  | 0.01   | -6.87011809  | 2.73E-10  | ** |
| siR_194792 | 15.598  | 0.01   | -10.60714542 | 2.19E-128 | ** |
| siR_194793 | 11.6276 | 0.01   | -10.18333764 | 6.90E-96  | ** |
| siR_194794 | 1.418   | 0.01   | -7.14771372  | 2.54E-12  | ** |
| siR_194795 | 1.0635  | 0.01   | -6.73267622  | 2.02E-09  | ** |
| siR_19484  | 0.01    | 1.1934 | 6.89893387   | 9.98E-11  | ** |
| siR_19487  | 0.01    | 8.4657 | 9.72548555   | 1.33E-71  | ** |
| siR_194879 | 35.1309 | 0.01   | -11.7785248  | 2.91E-288 | ** |
| siR_195    | 0.01    | 1.1561 | 6.85312238   | 2.05E-10  | ** |
| siR_19504  | 0.01    | 1.6409 | 7.35834351   | 1.79E-14  | ** |
| siR_195134 | 1.1698  | 0.01   | -6.87011809  | 2.73E-10  | ** |
| siR_195135 | 4.3603  | 0.01   | -8.76828358  | 2.10E-36  | ** |
| siR_195165 | 1.6661  | 0.01   | -7.38033118  | 2.36E-14  | ** |
| siR_195227 | 3.7931  | 0.01   | -8.56723361  | 9.20E-32  | ** |
| siR_195262 | 3.7931  | 0.01   | -8.56723361  | 9.20E-32  | ** |
| siR_19537  | 0.01    | 4.9974 | 8.96503389   | 1.43E-42  | ** |
| siR_195376 | 3.7577  | 0.01   | -8.5537061   | 1.79E-31  | ** |
| siR_195420 | 3.155   | 0.01   | -8.3014962   | 1.54E-26  | ** |
| siR_195432 | 1.3825  | 0.01   | -7.11113566  | 4.95E-12  | ** |
| siR_19551  | 1.5952  | 0.4102 | -1.95933792  | 8.02E-06  | ** |
| siR_195533 | 1.2407  | 0.01   | -6.95501051  | 7.17E-11  | ** |
| siR_195534 | 1.7725  | 0.01   | -7.46964183  | 3.18E-15  | ** |
| siR_195813 | 1.5598  | 0.01   | -7.28521726  | 1.75E-13  | ** |
| siR_195854 | 1.1698  | 0.01   | -6.87011809  | 2.73E-10  | ** |
| siR_195901 | 5.0339  | 0.01   | -8.97553276  | 6.43E-42  | ** |
| siR_196    | 0.01    | 1.0069 | 6.6537766    | 3.63E-09  | ** |
| siR_19606  | 0.01    | 3.3564 | 8.39077085   | 7.81E-29  | ** |
| siR_196264 | 1.0635  | 0.01   | -6.73267622  | 2.02E-09  | ** |
| siR_196422 | 4.7857  | 0.01   | -8.90258614  | 6.91E-40  | ** |
| siR_196446 | 2.5169  | 0.01   | -7.97550407  | 2.57E-21  | ** |
| siR_196491 | 1.7725  | 0.01   | -7.46964183  | 3.18E-15  | ** |
| siR_196518 | 2.3042  | 0.01   | -7.84812212  | 1.41E-19  | ** |
| siR_196519 | 2.0915  | 0.01   | -7.70839418  | 7.79E-18  | ** |
| siR_196545 | 2.4815  | 0.01   | -7.95506863  | 5.01E-21  | ** |
| siR_196546 | 1.2762  | 0.01   | -6.99571063  | 3.67E-11  | ** |
| siR_196583 | 2.3397  | 0.01   | -7.87017976  | 7.25E-20  | ** |
| siR_196616 | 1.7725  | 0.01   | -7.46964183  | 3.18E-15  | ** |

|            |           |         |               |              |    |
|------------|-----------|---------|---------------|--------------|----|
| siR_196617 | 1. 7725   | 0. 01   | -7. 46964183  | 3. 18E-15    | ** |
| siR_196618 | 1. 1344   | 0. 01   | -6. 82578563  | 5. 32E-10    | ** |
| siR_196619 | 1. 0989   | 0. 01   | -6. 7799163   | 1. 04E-09    | ** |
| siR_196629 | 1. 3116   | 0. 01   | -7. 035184    | 1. 88E-11    | ** |
| siR_196678 | 1. 1344   | 0. 01   | -6. 82578563  | 5. 32E-10    | ** |
| siR_19670  | 2. 6233   | 1. 0069 | -1. 38146239  | 7. 21E-06    | ** |
| siR_196703 | 2. 5524   | 0. 01   | -7. 99571063  | 1. 32E-21    | ** |
| siR_196853 | 6. 0974   | 0. 01   | -9. 25205038  | 1. 27E-50    | ** |
| siR_196864 | 1. 1698   | 0. 01   | -6. 87011809  | 2. 73E-10    | ** |
| siR_196910 | 8. 6498   | 0. 01   | -9. 75652296  | 1. 63E-71    | ** |
| siR_196914 | 19. 2493  | 0. 01   | -10. 9105903  | 2. 85E-158   | ** |
| siR_196915 | 7. 3381   | 0. 01   | -9. 51926273  | 8. 87E-61    | ** |
| siR_196916 | 2. 2688   | 0. 01   | -7. 82578561  | 2. 76E-19    | ** |
| siR_197049 | 5. 6365   | 0. 01   | -9. 13865581  | 7. 51E-47    | ** |
| siR_197180 | 1. 1698   | 0. 01   | -6. 87011809  | 2. 73E-10    | ** |
| siR_19723  | 1. 0989   | 0. 5221 | -1. 07366204  | 0. 018227899 | *  |
| siR_19726  | 0. 01     | 2. 0885 | 7. 70632333   | 3. 21E-18    | ** |
| siR_197268 | 1. 7725   | 0. 01   | -7. 46964183  | 3. 18E-15    | ** |
| siR_197439 | 3. 2259   | 0. 01   | -8. 33355791  | 4. 04E-27    | ** |
| siR_197444 | 248. 0433 | 0. 01   | -14. 59830586 | 0            | ** |
| siR_197455 | 11. 6985  | 0. 01   | -10. 19210792 | 1. 81E-96    | ** |
| siR_19754  | 10. 5995  | 9. 4353 | -0. 16785592  | 0. 173528055 |    |
| siR_19755  | 1. 4889   | 1. 8274 | 0. 2955456    | 0. 330437306 |    |
| siR_197597 | 10. 2805  | 0. 01   | -10. 00569477 | 7. 33E-85    | ** |
| siR_19764  | 0. 01     | 1. 6036 | 7. 32517051   | 3. 67E-14    | ** |
| siR_197669 | 1. 2053   | 0. 01   | -6. 91324847  | 1. 40E-10    | ** |
| siR_197747 | 2. 446    | 0. 01   | -7. 93428061  | 9. 77E-21    | ** |
| siR_197787 | 2. 3397   | 0. 01   | -7. 87017976  | 7. 25E-20    | ** |
| siR_197788 | 1. 2762   | 0. 01   | -6. 99571063  | 3. 67E-11    | ** |
| siR_197789 | 1. 0989   | 0. 01   | -6. 7799163   | 1. 04E-09    | ** |
| siR_197802 | 1. 2762   | 0. 01   | -6. 99571063  | 3. 67E-11    | ** |
| siR_197814 | 11. 3794  | 0. 01   | -10. 1522087  | 7. 41E-94    | ** |
| siR_197815 | 2. 8714   | 0. 01   | -8. 16561052  | 3. 22E-24    | ** |
| siR_197839 | 1. 9497   | 0. 01   | -7. 60710834  | 1. 13E-16    | ** |
| siR_197842 | 4. 9984   | 0. 01   | -8. 96532255  | 1. 25E-41    | ** |
| siR_197843 | 3. 864    | 0. 01   | -8. 59395129  | 2. 42E-32    | ** |
| siR_197844 | 1. 0989   | 0. 01   | -6. 7799163   | 1. 04E-09    | ** |
| siR_197845 | 1. 028    | 0. 01   | -6. 68369645  | 3. 95E-09    | ** |
| siR_197884 | 11. 5212  | 0. 01   | -10. 17007535 | 5. 12E-95    | ** |
| siR_197901 | 4. 7857   | 0. 01   | -8. 90258614  | 6. 91E-40    | ** |
| siR_197905 | 1. 0635   | 0. 01   | -6. 73267622  | 2. 02E-09    | ** |
| siR_197971 | 2. 9423   | 0. 01   | -8. 20080054  | 8. 47E-25    | ** |
| siR_198058 | 2. 6233   | 0. 01   | -8. 035239    | 3. 46E-22    | ** |
| siR_198231 | 3. 2259   | 0. 01   | -8. 33355791  | 4. 04E-27    | ** |
| siR_198295 | 1. 3471   | 0. 01   | -7. 07371314  | 9. 66E-12    | ** |
| siR_198331 | 1. 028    | 0. 01   | -6. 68369645  | 3. 95E-09    | ** |
| siR_198366 | 1. 2762   | 0. 01   | -6. 99571063  | 3. 67E-11    | ** |

|            |          |        |              |           |    |
|------------|----------|--------|--------------|-----------|----|
| siR_198580 | 3.3677   | 0.01   | -8.39561983  | 2.79E-28  | ** |
| siR_198627 | 3.0132   | 0.01   | -8.23515263  | 2.23E-25  | ** |
| siR_198639 | 1.028    | 0.01   | -6.68369645  | 3.95E-09  | ** |
| siR_198690 | 5.6365   | 0.01   | -9.13865581  | 7.51E-47  | ** |
| siR_198820 | 1.8079   | 0.01   | -7.49817107  | 1.63E-15  | ** |
| siR_198834 | 1.5243   | 0.01   | -7.25200305  | 3.42E-13  | ** |
| siR_198850 | 1.2762   | 0.01   | -6.99571063  | 3.67E-11  | ** |
| siR_19886  | 0.01     | 1.1188 | 6.80580835   | 4.20E-10  | ** |
| siR_198884 | 3.155    | 0.01   | -8.3014962   | 1.54E-26  | ** |
| siR_198929 | 1.8079   | 0.01   | -7.49817107  | 1.63E-15  | ** |
| siR_198943 | 1.9852   | 0.01   | -7.63314056  | 5.78E-17  | ** |
| siR_198990 | 1.6661   | 0.01   | -7.38033118  | 2.36E-14  | ** |
| siR_198999 | 400.1945 | 0.01   | -15.28841659 | 0         | ** |
| siR_199000 | 2.127    | 0.01   | -7.73267621  | 3.99E-18  | ** |
| siR_19902  | 0.01     | 1.3426 | 7.06888574   | 5.63E-12  | ** |
| siR_199021 | 27.5092  | 0.01   | -11.42569828 | 7.04E-226 | ** |
| siR_199044 | 9.7842   | 0.01   | -9.93431004  | 8.45E-81  | ** |
| siR_199178 | 1.2762   | 0.01   | -6.99571063  | 3.67E-11  | ** |
| siR_199180 | 1.9497   | 0.01   | -7.60710834  | 1.13E-16  | ** |
| siR_199184 | 3.6159   | 0.01   | -8.49821097  | 2.60E-30  | ** |
| siR_199283 | 1.5243   | 0.01   | -7.25200305  | 3.42E-13  | ** |
| siR_199363 | 1.3825   | 0.01   | -7.11113566  | 4.95E-12  | ** |
| siR_199401 | 1.0989   | 0.01   | -6.7799163   | 1.04E-09  | ** |
| siR_199459 | 248.9296 | 0.01   | -14.60345019 | 0         | ** |
| siR_199460 | 5.3884   | 0.01   | -9.07371312  | 8.07E-45  | ** |
| siR_199490 | 1.3471   | 0.01   | -7.07371314  | 9.66E-12  | ** |
| siR_199491 | 1.2762   | 0.01   | -6.99571063  | 3.67E-11  | ** |
| siR_199540 | 8.4725   | 0.01   | -9.72664389  | 4.60E-70  | ** |
| siR_199541 | 4.2894   | 0.01   | -8.74463204  | 7.97E-36  | ** |
| siR_199542 | 2.5169   | 0.01   | -7.97550407  | 2.57E-21  | ** |
| siR_199555 | 1.3825   | 0.01   | -7.11113566  | 4.95E-12  | ** |
| siR_199673 | 3.2614   | 0.01   | -8.34934759  | 2.07E-27  | ** |
| siR_199697 | 16.626   | 0.01   | -10.69922536 | 8.44E-137 | ** |
| siR_199733 | 22.2626  | 0.01   | -11.12040648 | 6.18E-183 | ** |
| siR_199756 | 1.8079   | 0.01   | -7.49817107  | 1.63E-15  | ** |
| siR_199772 | 1.2762   | 0.01   | -6.99571063  | 3.67E-11  | ** |
| siR_199782 | 2.9069   | 0.01   | -8.18333764  | 1.65E-24  | ** |
| siR_199783 | 2.4106   | 0.01   | -7.91324847  | 1.91E-20  | ** |
| siR_199787 | 1.2407   | 0.01   | -6.95501051  | 7.17E-11  | ** |
| siR_199803 | 1.3825   | 0.01   | -7.11113566  | 4.95E-12  | ** |
| siR_199806 | 4.0413   | 0.01   | -8.65867564  | 8.57E-34  | ** |
| siR_199810 | 6.6646   | 0.01   | -9.38037452  | 2.89E-55  | ** |
| siR_199829 | 1.3471   | 0.01   | -7.07371314  | 9.66E-12  | ** |
| siR_199842 | 4.4312   | 0.01   | -8.79155366  | 5.51E-37  | ** |
| siR_199875 | 1.028    | 0.01   | -6.68369645  | 3.95E-09  | ** |
| siR_199880 | 4.7857   | 0.01   | -8.90258614  | 6.91E-40  | ** |
| siR_200040 | 1.5598   | 0.01   | -7.28521726  | 1.75E-13  | ** |

|            |         |        |              |             |    |
|------------|---------|--------|--------------|-------------|----|
| siR_200095 | 4.0413  | 0.01   | -8.65867564  | 8.57E-34    | ** |
| siR_200105 | 17.2996 | 0.01   | -10.75652308 | 2.59E-142   | ** |
| siR_200117 | 1.0635  | 0.01   | -6.73267622  | 2.02E-09    | ** |
| siR_200247 | 1.3825  | 0.01   | -7.11113566  | 4.95E-12    | ** |
| siR_200288 | 1.0989  | 0.01   | -6.7799163   | 1.04E-09    | ** |
| siR_20030  | 20.1356 | 4.4753 | -2.16969216  | 6.64E-66    | ** |
| siR_20039  | 2.3042  | 1.3799 | -0.73970223  | 0.011805198 |    |
| siR_20044  | 0.01    | 12.307 | 10.26526341  | 9.32E-104   | ** |
| siR_200459 | 7.1254  | 0.01   | -9.47682718  | 4.89E-59    | ** |
| siR_200465 | 3.9704  | 0.01   | -8.63314056  | 3.26E-33    | ** |
| siR_20051  | 2.9778  | 1.8274 | -0.7044544   | 0.006013008 |    |
| siR_200543 | 19.2493 | 0.01   | -10.9105903  | 2.85E-158   | ** |
| siR_200580 | 3.8995  | 0.01   | -8.60714536  | 1.24E-32    | ** |
| siR_200598 | 1.3116  | 0.01   | -7.035184    | 1.88E-11    | ** |
| siR_20061  | 11.3794 | 5.2957 | -1.10353119  | 3.31E-15    | ** |
| siR_200618 | 1.9497  | 0.01   | -7.60710834  | 1.13E-16    | ** |
| siR_200622 | 2.8005  | 0.01   | -8.12954063  | 1.23E-23    | ** |
| siR_200652 | 43.8161 | 0.01   | -12.09724543 | 0           | ** |
| siR_20069  | 1.3116  | 0.6713 | -0.96629826  | 0.017699245 |    |
| siR_200768 | 1.5598  | 0.01   | -7.28521726  | 1.75E-13    | ** |
| siR_200776 | 1.3116  | 0.01   | -7.035184    | 1.88E-11    | ** |
| siR_200820 | 17.9731 | 0.01   | -10.81162367 | 7.95E-148   | ** |
| siR_200834 | 1.8434  | 0.01   | -7.52622535  | 8.37E-16    | ** |
| siR_20085  | 1.2762  | 0.5967 | -1.09677676  | 0.009487354 | ** |
| siR_200860 | 1.1698  | 0.01   | -6.87011809  | 2.73E-10    | ** |
| siR_200862 | 7.7635  | 0.01   | -9.60056343  | 2.92E-64    | ** |
| siR_200868 | 2.6233  | 0.01   | -8.035239    | 3.46E-22    | ** |
| siR_20088  | 0.01    | 1.0442 | 6.70625425   | 1.77E-09    | ** |
| siR_20094  | 0.01    | 5.4822 | 9.09861115   | 1.25E-46    | ** |
| siR_200953 | 2.3397  | 0.01   | -7.87017976  | 7.25E-20    | ** |
| siR_20097  | 5.8847  | 3.6548 | -0.68717641  | 0.000151387 |    |
| siR_201001 | 1.7725  | 0.01   | -7.46964183  | 3.18E-15    | ** |
| siR_20104  | 2.3042  | 1.0442 | -1.14186788  | 0.000292341 | ** |
| siR_201076 | 2.5524  | 0.01   | -7.99571063  | 1.32E-21    | ** |
| siR_20108  | 1.8434  | 1.268  | -0.53981441  | 0.089375721 |    |
| siR_20112  | 2.7296  | 1.7155 | -0.67006043  | 0.011884399 |    |
| siR_201135 | 9.3942  | 0.01   | -9.8756265   | 1.31E-77    | ** |
| siR_201141 | 1.028   | 0.01   | -6.68369645  | 3.95E-09    | ** |
| siR_201145 | 2.0206  | 0.01   | -7.65863995  | 2.96E-17    | ** |
| siR_20115  | 15.6689 | 9.3981 | -0.73746288  | 4.45E-11    |    |
| siR_201201 | 4.254   | 0.01   | -8.73267624  | 1.56E-35    | ** |
| siR_201203 | 13.1519 | 0.01   | -10.36105555 | 2.30E-108   | ** |
| siR_201204 | 2.8714  | 0.01   | -8.16561052  | 3.22E-24    | ** |
| siR_201223 | 1.1344  | 0.01   | -6.82578563  | 5.32E-10    | ** |
| siR_20123  | 1.028   | 0.5594 | -0.87788811  | 0.053501766 |    |
| siR_201275 | 2.9069  | 0.01   | -8.18333764  | 1.65E-24    | ** |
| siR_201399 | 2.0561  | 0.01   | -7.68376661  | 1.52E-17    | ** |

|            |          |        |              |             |    |
|------------|----------|--------|--------------|-------------|----|
| siR_201404 | 218.7617 | 0.01   | -14.41707385 | 0           | ** |
| siR_201405 | 4.3958   | 0.01   | -8.77998192  | 1.07E-36    | ** |
| siR_201406 | 2.1979   | 0.01   | -7.77998195  | 1.05E-18    | ** |
| siR_201430 | 2.5524   | 0.01   | -7.99571063  | 1.32E-21    | ** |
| siR_201528 | 19.852   | 0.01   | -10.9550686  | 3.33E-163   | ** |
| siR_20162  | 5.5302   | 2.7225 | -1.02239961  | 2.57E-07    | ** |
| siR_201785 | 5.1757   | 0.01   | -9.01561019  | 4.44E-43    | ** |
| siR_201789 | 1.2053   | 0.01   | -6.91324847  | 1.40E-10    | ** |
| siR_201809 | 9.5715   | 0.01   | -9.90260126  | 4.66E-79    | ** |
| siR_201814 | 1.0989   | 0.01   | -6.7799163   | 1.04E-09    | ** |
| siR_201836 | 5.7429   | 0.01   | -9.16563566  | 1.01E-47    | ** |
| siR_201864 | 1.028    | 0.01   | -6.68369645  | 3.95E-09    | ** |
| siR_202047 | 29.069   | 0.01   | -11.50526565 | 1.20E-238   | ** |
| siR_202086 | 1.2053   | 0.01   | -6.91324847  | 1.40E-10    | ** |
| siR_202152 | 249.5322 | 0.01   | -14.60693795 | 0           | ** |
| siR_202210 | 24.7795  | 0.01   | -11.27493134 | 1.55E-203   | ** |
| siR_202269 | 2.5524   | 0.01   | -7.99571063  | 1.32E-21    | ** |
| siR_202287 | 2.3751   | 0.01   | -7.89184446  | 3.72E-20    | ** |
| siR_202302 | 1.2762   | 0.01   | -6.99571063  | 3.67E-11    | ** |
| siR_202406 | 21.27    | 0.01   | -11.05460446 | 8.23E-175   | ** |
| siR_202444 | 1.5952   | 0.01   | -7.31759351  | 8.99E-14    | ** |
| siR_202465 | 1.0989   | 0.01   | -6.7799163   | 1.04E-09    | ** |
| siR_202466 | 1.9497   | 0.01   | -7.60710834  | 1.13E-16    | ** |
| siR_202501 | 2.8005   | 0.01   | -8.12954063  | 1.23E-23    | ** |
| siR_202553 | 1.9143   | 0.01   | -7.58067313  | 2.20E-16    | ** |
| siR_20267  | 6.9127   | 9.4726 | 0.45451115   | 0.000892945 | ** |
| siR_202698 | 2.9423   | 0.01   | -8.20080054  | 8.47E-25    | ** |
| siR_202700 | 1.8434   | 0.01   | -7.52622535  | 8.37E-16    | ** |
| siR_202731 | 1.8788   | 0.01   | -7.55366769  | 4.29E-16    | ** |
| siR_202738 | 5.1757   | 0.01   | -9.01561019  | 4.44E-43    | ** |
| siR_202853 | 1.1698   | 0.01   | -6.87011809  | 2.73E-10    | ** |
| siR_202860 | 1.3825   | 0.01   | -7.11113566  | 4.95E-12    | ** |
| siR_202865 | 2.446    | 0.01   | -7.93428061  | 9.77E-21    | ** |
| siR_202881 | 1.0989   | 0.01   | -6.7799163   | 1.04E-09    | ** |
| siR_202883 | 1.3471   | 0.01   | -7.07371314  | 9.66E-12    | ** |
| siR_202897 | 1.2407   | 0.01   | -6.95501051  | 7.17E-11    | ** |
| siR_202914 | 2.0206   | 0.01   | -7.65863995  | 2.96E-17    | ** |
| siR_202953 | 5.1402   | 0.01   | -9.00568068  | 8.67E-43    | ** |
| siR_202961 | 9.0043   | 0.01   | -9.81447031  | 2.04E-74    | ** |
| siR_202985 | 2.0206   | 0.01   | -7.65863995  | 2.96E-17    | ** |
| siR_20299  | 0.01     | 3.7294 | 8.54279973   | 5.90E-32    | ** |
| siR_203094 | 1.5952   | 0.01   | -7.31759351  | 8.99E-14    | ** |
| siR_203146 | 1.5952   | 0.01   | -7.31759351  | 8.99E-14    | ** |
| siR_203167 | 4.3249   | 0.01   | -8.75652296  | 4.09E-36    | ** |
| siR_203216 | 1.0635   | 0.01   | -6.73267622  | 2.02E-09    | ** |
| siR_203265 | 2.9423   | 0.01   | -8.20080054  | 8.47E-25    | ** |
| siR_203266 | 2.1624   | 0.01   | -7.75648961  | 2.05E-18    | ** |



|            |          |          |               |               |    |
|------------|----------|----------|---------------|---------------|----|
| siR_20329  | 1. 5243  | 0. 8578  | -0. 82943365  | 0. 024298572  |    |
| siR_203341 | 1. 4534  | 0. 01    | -7. 18328801  | 1. 30E-12     | ** |
| siR_2034   | 1. 028   | 0. 3729  | -1. 46297956  | 0. 003720663  | ** |
| siR_203426 | 6. 2746  | 0. 01    | -9. 29337967  | 4. 50E-52     | ** |
| siR_203430 | 6. 4164  | 0. 01    | -9. 3256203   | 3. 11E-53     | ** |
| siR_2036   | 0. 01    | 2. 6479  | 8. 04870483   | 6. 67E-23     | ** |
| siR_203692 | 1. 3471  | 0. 01    | -7. 07371314  | 9. 66E-12     | ** |
| siR_203952 | 1. 2407  | 0. 01    | -6. 95501051  | 7. 17E-11     | ** |
| siR_20399  | 4. 6085  | 5. 6314  | 0. 28919638   | 0. 093597106  |    |
| siR_203993 | 2. 0561  | 0. 01    | -7. 68376661  | 1. 52E-17     | ** |
| siR_204059 | 2. 2688  | 0. 01    | -7. 82578561  | 2. 76E-19     | ** |
| siR_20406  | 0. 01    | 16. 6331 | 10. 69984136  | 5. 71E-140    | ** |
| siR_204097 | 4. 254   | 0. 01    | -8. 73267624  | 1. 56E-35     | ** |
| siR_20413  | 0. 01    | 11. 3746 | 10. 1516001   | 5. 94E-96     | ** |
| siR_20423  | 5. 6365  | 4. 2515  | -0. 40682766  | 0. 021169734  |    |
| siR_204286 | 1. 1344  | 0. 01    | -6. 82578563  | 5. 32E-10     | ** |
| siR_204325 | 1. 3471  | 0. 01    | -7. 07371314  | 9. 66E-12     | ** |
| siR_20436  | 20. 7028 | 8. 6149  | -1. 26491995  | 2. 12E-32     | ** |
| siR_204445 | 6. 2392  | 0. 01    | -9. 28521723  | 8. 77E-52     | ** |
| siR_204454 | 3. 864   | 0. 01    | -8. 59395129  | 2. 42E-32     | ** |
| siR_204502 | 5. 0693  | 0. 01    | -8. 98564277  | 3. 30E-42     | ** |
| siR_204504 | 22. 0853 | 0. 01    | -11. 1088706  | 1. 75E-181    | ** |
| siR_204537 | 2. 9423  | 0. 01    | -8. 20080054  | 8. 47E-25     | ** |
| siR_204593 | 18. 7176 | 0. 01    | -10. 87017982 | 6. 41E-154    | ** |
| siR_204617 | 9. 0752  | 0. 01    | -9. 82578561  | 5. 37E-75     | ** |
| siR_20462  | 0. 01    | 7. 7198  | 9. 59241966   | 2. 33E-65     | ** |
| siR_204626 | 4. 6794  | 0. 01    | -8. 87017976  | 5. 13E-39     | ** |
| siR_204634 | 2. 3042  | 0. 01    | -7. 84812212  | 1. 41E-19     | ** |
| siR_20467  | 0. 01    | 2. 536   | 7. 98641094   | 5. 76E-22     | ** |
| siR_204687 | 2. 836   | 0. 01    | -8. 14771372  | 6. 28E-24     | ** |
| siR_204760 | 1. 028   | 0. 01    | -6. 68369645  | 3. 95E-09     | ** |
| siR_204792 | 6. 6646  | 0. 01    | -9. 38037452  | 2. 89E-55     | ** |
| siR_20483  | 0. 01    | 1. 6782  | 7. 39077085   | 8. 72E-15     | ** |
| siR_204850 | 1. 8434  | 0. 01    | -7. 52622535  | 8. 37E-16     | ** |
| siR_204866 | 6. 4164  | 0. 01    | -9. 3256203   | 3. 11E-53     | ** |
| siR_20487  | 2. 9778  | 3. 2073  | 0. 10711244   | 0. 627760419  |    |
| siR_204900 | 1. 2407  | 0. 01    | -6. 95501051  | 7. 17E-11     | ** |
| siR_204933 | 8. 3662  | 0. 01    | -9. 70842867  | 3. 42E-69     | ** |
| siR_204953 | 10. 245  | 0. 01    | -10. 00070426 | 1. 43E-84     | ** |
| siR_204958 | 39. 2431 | 0. 01    | -11. 93822311 | 285339593621e | ** |
| siR_205089 | 2. 0561  | 0. 01    | -7. 68376661  | 1. 52E-17     | ** |
| siR_205105 | 1. 5243  | 0. 01    | -7. 25200305  | 3. 42E-13     | ** |
| siR_205172 | 1. 5952  | 0. 01    | -7. 31759351  | 8. 99E-14     | ** |
| siR_205249 | 1. 3471  | 0. 01    | -7. 07371314  | 9. 66E-12     | ** |
| siR_205267 | 3. 4032  | 0. 01    | -8. 41074813  | 1. 43E-28     | ** |
| siR_20528  | 4. 4312  | 1. 6782  | -1. 40078278  | 3. 40E-09     | ** |
| siR_205325 | 12. 0175 | 0. 01    | -10. 23092113 | 4. 44E-99     | ** |

|            |           |         |               |              |    |
|------------|-----------|---------|---------------|--------------|----|
| siR_20534  | 5. 5302   | 3. 3564 | -0. 720417    | 0. 000129462 |    |
| siR_205419 | 3. 4741   | 0. 01   | -8. 44049549  | 3. 76E-29    | ** |
| siR_205461 | 1. 2762   | 0. 01   | -6. 99571063  | 3. 67E-11    | ** |
| siR_205466 | 2. 3751   | 0. 01   | -7. 89184446  | 3. 72E-20    | ** |
| siR_205704 | 1. 8079   | 0. 01   | -7. 49817107  | 1. 63E-15    | ** |
| siR_205714 | 4. 6085   | 0. 01   | -8. 84815347  | 1. 95E-38    | ** |
| siR_205719 | 1. 2407   | 0. 01   | -6. 95501051  | 7. 17E-11    | ** |
| siR_205722 | 1. 0635   | 0. 01   | -6. 73267622  | 2. 02E-09    | ** |
| siR_20579  | 0. 01     | 7. 8317 | 9. 61318169   | 2. 70E-66    | ** |
| siR_205990 | 5. 3175   | 0. 01   | -9. 0546043   | 3. 07E-44    | ** |
| siR_206002 | 2. 7296   | 0. 01   | -8. 09254576  | 4. 66E-23    | ** |
| siR_206101 | 1. 3116   | 0. 01   | -7. 035184    | 1. 88E-11    | ** |
| siR_206123 | 1. 2762   | 0. 01   | -6. 99571063  | 3. 67E-11    | ** |
| siR_206124 | 1. 0989   | 0. 01   | -6. 7799163   | 1. 04E-09    | ** |
| siR_206127 | 1. 028    | 0. 01   | -6. 68369645  | 3. 95E-09    | ** |
| siR_206174 | 1. 9852   | 0. 01   | -7. 63314056  | 5. 78E-17    | ** |
| siR_206189 | 1. 7016   | 0. 01   | -7. 41074813  | 1. 21E-14    | ** |
| siR_2062   | 0. 01     | 2. 4987 | 7. 96503389   | 1. 18E-21    | ** |
| siR_206217 | 1. 8434   | 0. 01   | -7. 52622535  | 8. 37E-16    | ** |
| siR_206239 | 1. 7016   | 0. 01   | -7. 41074813  | 1. 21E-14    | ** |
| siR_206266 | 1. 2407   | 0. 01   | -6. 95501051  | 7. 17E-11    | ** |
| siR_206408 | 1. 9143   | 0. 01   | -7. 58067313  | 2. 20E-16    | ** |
| siR_20641  | 1. 1698   | 0. 9323 | -0. 32739572  | 0. 39733091  |    |
| siR_20650  | 8. 6143   | 2. 4241 | -1. 82928435  | 1. 35E-23    | ** |
| siR_206527 | 4. 8566   | 0. 01   | -8. 92380283  | 1. 82E-40    | ** |
| siR_206537 | 1. 5243   | 0. 01   | -7. 25200305  | 3. 42E-13    | ** |
| siR_20661  | 1. 737    | 0. 7832 | -1. 14914508  | 0. 001614857 | ** |
| siR_206624 | 1. 0635   | 0. 01   | -6. 73267622  | 2. 02E-09    | ** |
| siR_206667 | 3. 1196   | 0. 01   | -8. 28521723  | 3. 00E-26    | ** |
| siR_2068   | 14. 6408  | 4. 1396 | -1. 82243111  | 8. 13E-39    | ** |
| siR_206837 | 1. 028    | 0. 01   | -6. 68369645  | 3. 95E-09    | ** |
| siR_206846 | 1. 0635   | 0. 01   | -6. 73267622  | 2. 02E-09    | ** |
| siR_206869 | 1. 3825   | 0. 01   | -7. 11113566  | 4. 95E-12    | ** |
| siR_2069   | 5. 2466   | 1. 6036 | -1. 71006848  | 9. 67E-14    | ** |
| siR_206973 | 1. 2053   | 0. 01   | -6. 91324847  | 1. 40E-10    | ** |
| siR_2070   | 1. 2053   | 0. 4475 | -1. 42943269  | 0. 001965568 | ** |
| siR_207043 | 1. 6661   | 0. 01   | -7. 38033118  | 2. 36E-14    | ** |
| siR_207058 | 1. 2407   | 0. 01   | -6. 95501051  | 7. 17E-11    | ** |
| siR_20710  | 0. 8508   | 1. 0815 | 0. 34614173   | 0. 386002893 |    |
| siR_20711  | 1. 5952   | 1. 4545 | -0. 13321402  | 0. 67732156  |    |
| siR_207242 | 4. 2894   | 0. 01   | -8. 74463204  | 7. 97E-36    | ** |
| siR_207253 | 81. 8185  | 0. 01   | -12. 99821193 | 0            | ** |
| siR_207261 | 113. 4399 | 0. 01   | -13. 46964063 | 0            | ** |
| siR_207262 | 1. 0635   | 0. 01   | -6. 73267622  | 2. 02E-09    | ** |
| siR_20733  | 0. 01     | 1. 4172 | 7. 14689956   | 1. 34E-12    | ** |
| siR_20734  | 0. 01     | 1. 268  | 6. 98641094   | 2. 37E-11    | ** |
| siR_207397 | 1. 8079   | 0. 01   | -7. 49817107  | 1. 63E-15    | ** |

|            |         |         |             |             |    |
|------------|---------|---------|-------------|-------------|----|
| siR_20740  | 0.01    | 2.4614  | 7.94333532  | 2.43E-21    | ** |
| siR_207404 | 1.1698  | 0.01    | -6.87011809 | 2.73E-10    | ** |
| siR_207406 | 4.4667  | 0.01    | -8.80306553 | 2.82E-37    | ** |
| siR_207407 | 1.028   | 0.01    | -6.68369645 | 3.95E-09    | ** |
| siR_207428 | 5.1757  | 0.01    | -9.01561019 | 4.44E-43    | ** |
| siR_20747  | 0.01    | 1.1188  | 6.80580835  | 4.20E-10    | ** |
| siR_207491 | 2.6233  | 0.01    | -8.035239   | 3.46E-22    | ** |
| siR_207510 | 1.1344  | 0.01    | -6.82578563 | 5.32E-10    | ** |
| siR_20754  | 0.01    | 1.4918  | 7.22091032  | 3.17E-13    | ** |
| siR_20755  | 0.01    | 1.4545  | 7.18437949  | 6.51E-13    | ** |
| siR_207581 | 1.4889  | 0.01    | -7.21810305 | 6.67E-13    | ** |
| siR_20760  | 0.01    | 22.3763 | 11.12775579 | 4.79E-188   | ** |
| siR_20761  | 0.01    | 5.3703  | 9.06885887  | 1.08E-45    | ** |
| siR_20762  | 0.01    | 2.0885  | 7.70632333  | 3.21E-18    | ** |
| siR_20769  | 2.0915  | 1.4545  | -0.5240147  | 0.077839011 |    |
| siR_207725 | 1.1698  | 0.01    | -6.87011809 | 2.73E-10    | ** |
| siR_207777 | 1.3825  | 0.01    | -7.11113566 | 4.95E-12    | ** |
| siR_20779  | 1.4889  | 0.7086  | -1.07120349 | 0.005883379 | ** |
| siR_20781  | 0.8508  | 1.268   | 0.57566281  | 0.134054238 |    |
| siR_20784  | 3.864   | 2.8343  | -0.44710262 | 0.037542216 |    |
| siR_20802  | 4.8921  | 3.5056  | -0.48079251 | 0.012276902 |    |
| siR_208044 | 4.0413  | 0.01    | -8.65867564 | 8.57E-34    | ** |
| siR_208045 | 3.3323  | 0.01    | -8.38037447 | 5.44E-28    | ** |
| siR_208046 | 2.2688  | 0.01    | -7.82578561 | 2.76E-19    | ** |
| siR_20818  | 2.8714  | 1.268   | -1.17919957 | 3.26E-05    | ** |
| siR_208212 | 6.1683  | 0.01    | -9.26872915 | 3.34E-51    | ** |
| siR_208300 | 1.1344  | 0.01    | -6.82578563 | 5.32E-10    | ** |
| siR_208433 | 3.0841  | 0.01    | -8.26870574 | 5.85E-26    | ** |
| siR_208621 | 1.418   | 0.01    | -7.14771372 | 2.54E-12    | ** |
| siR_208623 | 9.5715  | 0.01    | -9.90260126 | 4.66E-79    | ** |
| siR_208627 | 1.6661  | 0.01    | -7.38033118 | 2.36E-14    | ** |
| siR_208700 | 5.8847  | 0.01    | -9.20082503 | 6.99E-49    | ** |
| siR_208714 | 1.737   | 0.01    | -7.44045394 | 6.21E-15    | ** |
| siR_208758 | 1.1698  | 0.01    | -6.87011809 | 2.73E-10    | ** |
| siR_208802 | 18.1149 | 0.01    | -10.822961  | 5.49E-149   | ** |
| siR_208827 | 1.8788  | 0.01    | -7.55366769 | 4.29E-16    | ** |
| siR_208840 | 1.028   | 0.01    | -6.68369645 | 3.95E-09    | ** |
| siR_209027 | 1.737   | 0.01    | -7.44045394 | 6.21E-15    | ** |
| siR_20904  | 15.4562 | 7.4588  | -1.05117022 | 1.05E-18    | ** |
| siR_209133 | 3.1196  | 0.01    | -8.28521723 | 3.00E-26    | ** |
| siR_209145 | 1.3825  | 0.01    | -7.11113566 | 4.95E-12    | ** |
| siR_209176 | 1.4534  | 0.01    | -7.18328801 | 1.30E-12    | ** |
| siR_209224 | 5.2466  | 0.01    | -9.03523897 | 1.17E-43    | ** |
| siR_209225 | 1.5598  | 0.01    | -7.28521726 | 1.75E-13    | ** |
| siR_209226 | 1.0989  | 0.01    | -6.7799163  | 1.04E-09    | ** |
| siR_209250 | 1.1698  | 0.01    | -6.87011809 | 2.73E-10    | ** |
| siR_20935  | 1.5598  | 0.9323  | -0.74249488 | 0.038356641 |    |

|            |         |         |              |             |    |
|------------|---------|---------|--------------|-------------|----|
| siR_209369 | 1.1344  | 0.01    | -6.82578563  | 5.32E-10    | ** |
| siR_20949  | 0.01    | 2.0512  | 7.68032436   | 6.59E-18    | ** |
| siR_209494 | 3.1196  | 0.01    | -8.28521723  | 3.00E-26    | ** |
| siR_209532 | 18.6112 | 0.01    | -10.86195527 | 4.76E-153   | ** |
| siR_209535 | 59.5559 | 0.01    | -12.54002852 | 0           | ** |
| siR_209629 | 1.1698  | 0.01    | -6.87011809  | 2.73E-10    | ** |
| siR_209636 | 10.5286 | 0.01    | -10.04009789 | 6.82E-87    | ** |
| siR_20969  | 5.4593  | 5.1838  | -0.07470592  | 0.660058918 |    |
| siR_209727 | 1.3471  | 0.01    | -7.07371314  | 9.66E-12    | ** |
| siR_209740 | 2.0206  | 0.01    | -7.65863995  | 2.96E-17    | ** |
| siR_209813 | 2.1624  | 0.01    | -7.75648961  | 2.05E-18    | ** |
| siR_209814 | 11.344  | 0.01    | -10.14771368 | 1.45E-93    | ** |
| siR_209834 | 1.0635  | 0.01    | -6.73267622  | 2.02E-09    | ** |
| siR_209931 | 1.9852  | 0.01    | -7.63314056  | 5.78E-17    | ** |
| siR_209958 | 1.7016  | 0.01    | -7.41074813  | 1.21E-14    | ** |
| siR_20997  | 0.01    | 10.5915 | 10.04869121  | 2.14E-89    | ** |
| siR_21019  | 0.01    | 1.4918  | 7.22091032   | 3.17E-13    | ** |
| siR_210247 | 1.0989  | 0.01    | -6.7799163   | 1.04E-09    | ** |
| siR_21030  | 0.01    | 1.0069  | 6.6537766    | 3.63E-09    | ** |
| siR_21032  | 4.0058  | 1.6036  | -1.32077607  | 7.83E-08    | ** |
| siR_21033  | 60.3358 | 20.81   | -1.53573731  | 1.35E-121   | ** |
| siR_21046  | 13.5419 | 5.6314  | -1.26586464  | 9.13E-22    | ** |
| siR_210488 | 1.418   | 0.01    | -7.14771372  | 2.54E-12    | ** |
| siR_21049  | 9.8905  | 3.431   | -1.52741433  | 3.69E-21    | ** |
| siR_210547 | 1.3825  | 0.01    | -7.11113566  | 4.95E-12    | ** |
| siR_210580 | 1.3116  | 0.01    | -7.035184    | 1.88E-11    | ** |
| siR_21064  | 7.3027  | 4.5871  | -0.67084761  | 3.56E-05    |    |
| siR_210645 | 1.5952  | 0.01    | -7.31759351  | 8.99E-14    | ** |
| siR_21069  | 1.737   | 1.1934  | -0.54152007  | 0.098359564 |    |
| siR_2107   | 1.4534  | 0.7086  | -1.03638844  | 0.008088782 | ** |
| siR_210704 | 4.5021  | 0.01    | -8.81445427  | 1.45E-37    | ** |
| siR_210712 | 1.418   | 0.01    | -7.14771372  | 2.54E-12    | ** |
| siR_210717 | 13.7191 | 0.01    | -10.4219701  | 5.24E-113   | ** |
| siR_21073  | 2.2688  | 0.9323  | -1.28306327  | 8.18E-05    | ** |
| siR_210739 | 2.1979  | 0.01    | -7.77998195  | 1.05E-18    | ** |
| siR_21078  | 16.9805 | 2.0885  | -3.02333989  | 1.94E-80    | ** |
| siR_21079  | 1.9143  | 1.3053  | -0.55243552  | 0.077017621 |    |
| siR_210926 | 1.6661  | 0.01    | -7.38033118  | 2.36E-14    | ** |
| siR_210928 | 4.0058  | 0.01    | -8.64594661  | 1.67E-33    | ** |
| siR_21095  | 0.01    | 1.0442  | 6.70625425   | 1.77E-09    | ** |
| siR_21105  | 1.4889  | 0.634   | -1.23169211  | 0.002080356 | ** |
| siR_21106  | 3.4386  | 1.6409  | -1.06733398  | 2.66E-05    | ** |
| siR_211079 | 1.7725  | 0.01    | -7.46964183  | 3.18E-15    | ** |
| siR_21114  | 30.487  | 15.6634 | -0.96079678  | 1.03E-30    |    |
| siR_211213 | 2.5169  | 0.01    | -7.97550407  | 2.57E-21    | ** |
| siR_211309 | 1.9143  | 0.01    | -7.58067313  | 2.20E-16    | ** |
| siR_21134  | 3.7577  | 1.1188  | -1.74789773  | 1.67E-10    | ** |

|            |         |        |              |             |    |
|------------|---------|--------|--------------|-------------|----|
| siR_211346 | 1.1698  | 0.01   | -6.87011809  | 2.73E-10    | ** |
| siR_211453 | 1.0989  | 0.01   | -6.7799163   | 1.04E-09    | ** |
| siR_211575 | 6.2392  | 0.01   | -9.28521723  | 8.77E-52    | ** |
| siR_21158  | 0.01    | 1.6036 | 7.32517051   | 3.67E-14    | ** |
| siR_21162  | 5.8138  | 3.2819 | -0.82495016  | 1.02E-05    |    |
| siR_21165  | 4.7857  | 3.7667 | -0.34542883  | 0.068507129 |    |
| siR_21166  | 2.1979  | 1.5663 | -0.48876518  | 0.089755353 |    |
| siR_211663 | 1.2053  | 0.01   | -6.91324847  | 1.40E-10    | ** |
| siR_211666 | 1.8079  | 0.01   | -7.49817107  | 1.63E-15    | ** |
| siR_211673 | 6.4164  | 0.01   | -9.3256203   | 3.11E-53    | ** |
| siR_211728 | 8.1889  | 0.01   | -9.6775259   | 9.64E-68    | ** |
| siR_211734 | 1.1698  | 0.01   | -6.87011809  | 2.73E-10    | ** |
| siR_211865 | 1.2407  | 0.01   | -6.95501051  | 7.17E-11    | ** |
| siR_211893 | 1.4889  | 0.01   | -7.21810305  | 6.67E-13    | ** |
| siR_211895 | 1.3471  | 0.01   | -7.07371314  | 9.66E-12    | ** |
| siR_212032 | 2.127   | 0.01   | -7.73267621  | 3.99E-18    | ** |
| siR_212103 | 4.2894  | 0.01   | -8.74463204  | 7.97E-36    | ** |
| siR_212108 | 1.4889  | 0.01   | -7.21810305  | 6.67E-13    | ** |
| siR_212146 | 2.7651  | 0.01   | -8.11118786  | 2.39E-23    | ** |
| siR_212248 | 1.8788  | 0.01   | -7.55366769  | 4.29E-16    | ** |
| siR_212268 | 8.4725  | 0.01   | -9.72664389  | 4.60E-70    | ** |
| siR_21247  | 1.5598  | 1.1188 | -0.4794089   | 0.1615353   |    |
| siR_212625 | 6.1328  | 0.01   | -9.26040207  | 6.51E-51    | ** |
| siR_212634 | 52.3596 | 0.01   | -12.35423869 | 0           | ** |
| siR_212635 | 2.5524  | 0.01   | -7.99571063  | 1.32E-21    | ** |
| siR_212640 | 3.6868  | 0.01   | -8.52622535  | 6.83E-31    | ** |
| siR_212687 | 1.0635  | 0.01   | -6.73267622  | 2.02E-09    | ** |
| siR_212703 | 2.7651  | 0.01   | -8.11118786  | 2.39E-23    | ** |
| siR_212713 | 2.0561  | 0.01   | -7.68376661  | 1.52E-17    | ** |
| siR_212786 | 2.5169  | 0.01   | -7.97550407  | 2.57E-21    | ** |
| siR_212878 | 3.3323  | 0.01   | -8.38037447  | 5.44E-28    | ** |
| siR_212936 | 1.5243  | 0.01   | -7.25200305  | 3.42E-13    | ** |
| siR_212947 | 12.2302 | 0.01   | -10.25623231 | 8.06E-101   | ** |
| siR_212989 | 2.3042  | 0.01   | -7.84812212  | 1.41E-19    | ** |
| siR_21303  | 8.0826  | 2.3495 | -1.78246568  | 1.65E-21    | ** |
| siR_213058 | 2.7296  | 0.01   | -8.09254576  | 4.66E-23    | ** |
| siR_213065 | 1.2407  | 0.01   | -6.95501051  | 7.17E-11    | ** |
| siR_213066 | 1.2407  | 0.01   | -6.95501051  | 7.17E-11    | ** |
| siR_213159 | 1.1344  | 0.01   | -6.82578563  | 5.32E-10    | ** |
| siR_213238 | 1.7725  | 0.01   | -7.46964183  | 3.18E-15    | ** |
| siR_21324  | 1.2762  | 0.5221 | -1.28945638  | 0.003202105 | ** |
| siR_213262 | 1.2053  | 0.01   | -6.91324847  | 1.40E-10    | ** |
| siR_213273 | 1.1698  | 0.01   | -6.87011809  | 2.73E-10    | ** |
| siR_213283 | 2.5524  | 0.01   | -7.99571063  | 1.32E-21    | ** |
| siR_213318 | 1.1344  | 0.01   | -6.82578563  | 5.32E-10    | ** |
| siR_213417 | 14.0382 | 0.01   | -10.45514232 | 1.28E-115   | ** |
| siR_213465 | 1.6661  | 0.01   | -7.38033118  | 2.36E-14    | ** |

|            |         |        |              |             |    |
|------------|---------|--------|--------------|-------------|----|
| siR_213469 | 1.4534  | 0.01   | -7.18328801  | 1.30E-12    | ** |
| siR_2135   | 1.1344  | 0.5221 | -1.11953137  | 0.013060942 | *  |
| siR_213507 | 4.5376  | 0.01   | -8.82578561  | 7.42E-38    | ** |
| siR_213508 | 1.2407  | 0.01   | -6.95501051  | 7.17E-11    | ** |
| siR_213510 | 2.1979  | 0.01   | -7.77998195  | 1.05E-18    | ** |
| siR_2136   | 11.0604 | 6.5637 | -0.75282236  | 1.77E-08    |    |
| siR_213617 | 1.8079  | 0.01   | -7.49817107  | 1.63E-15    | ** |
| siR_213655 | 1.2762  | 0.01   | -6.99571063  | 3.67E-11    | ** |
| siR_213727 | 2.6942  | 0.01   | -8.07371315  | 9.10E-23    | ** |
| siR_21374  | 0.01    | 1.5663 | 7.29121675   | 7.54E-14    | ** |
| siR_21375  | 8.4725  | 4.699  | -0.85043396  | 4.43E-08    |    |
| siR_21377  | 1.3471  | 1.1561 | -0.22059076  | 0.53282973  |    |
| siR_213810 | 1.8434  | 0.01   | -7.52622535  | 8.37E-16    | ** |
| siR_213897 | 2.1979  | 0.01   | -7.77998195  | 1.05E-18    | ** |
| siR_213972 | 47.6093 | 0.01   | -12.21702767 | 0           | ** |
| siR_213989 | 2.5524  | 0.01   | -7.99571063  | 1.32E-21    | ** |
| siR_213994 | 12.8683 | 0.01   | -10.32960581 | 4.82E-106   | ** |
| siR_214016 | 4.9275  | 0.01   | -8.94471205  | 4.77E-41    | ** |
| siR_214061 | 1.028   | 0.01   | -6.68369645  | 3.95E-09    | ** |
| siR_214066 | 1.3471  | 0.01   | -7.07371314  | 9.66E-12    | ** |
| siR_214108 | 1.737   | 0.01   | -7.44045394  | 6.21E-15    | ** |
| siR_214152 | 1.3825  | 0.01   | -7.11113566  | 4.95E-12    | ** |
| siR_214217 | 1.1344  | 0.01   | -6.82578563  | 5.32E-10    | ** |
| siR_214260 | 1.9143  | 0.01   | -7.58067313  | 2.20E-16    | ** |
| siR_214311 | 1.1344  | 0.01   | -6.82578563  | 5.32E-10    | ** |
| siR_214416 | 1.6661  | 0.01   | -7.38033118  | 2.36E-14    | ** |
| siR_214420 | 2.3042  | 0.01   | -7.84812212  | 1.41E-19    | ** |
| siR_214434 | 4.1122  | 0.01   | -8.68376664  | 2.25E-34    | ** |
| siR_214465 | 1.5952  | 0.01   | -7.31759351  | 8.99E-14    | ** |
| siR_21455  | 2.2333  | 1.268  | -0.81662232  | 0.00694745  |    |
| siR_21457  | 3.9349  | 1.1934 | -1.72124929  | 9.84E-11    | ** |
| siR_21460  | 6.1683  | 2.3122 | -1.41560674  | 1.96E-12    | ** |
| siR_214623 | 1.6661  | 0.01   | -7.38033118  | 2.36E-14    | ** |
| siR_214667 | 5.4238  | 0.01   | -9.08316017  | 4.14E-45    | ** |
| siR_214668 | 5.1757  | 0.01   | -9.01561019  | 4.44E-43    | ** |
| siR_214688 | 3.0487  | 0.01   | -8.25205038  | 1.14E-25    | ** |
| siR_214702 | 14.1091 | 0.01   | -10.46241031 | 3.37E-116   | ** |
| siR_214712 | 31.4087 | 0.01   | -11.61694862 | 8.52E-258   | ** |
| siR_214716 | 1.1698  | 0.01   | -6.87011809  | 2.73E-10    | ** |
| siR_21473  | 1.5243  | 0.8205 | -0.89357163  | 0.016425748 |    |
| siR_214738 | 2.6587  | 0.01   | -8.05457718  | 1.77E-22    | ** |
| siR_214754 | 25.7012 | 0.01   | -11.32761997 | 4.42E-211   | ** |
| siR_214816 | 2.3042  | 0.01   | -7.84812212  | 1.41E-19    | ** |
| siR_214904 | 5.1048  | 0.01   | -8.99571063  | 1.69E-42    | ** |
| siR_214905 | 3.0841  | 0.01   | -8.26870574  | 5.85E-26    | ** |
| siR_214918 | 1.2762  | 0.01   | -6.99571063  | 3.67E-11    | ** |
| siR_214925 | 3.5095  | 0.01   | -8.45512172  | 1.93E-29    | ** |

|            |         |         |              |             |    |
|------------|---------|---------|--------------|-------------|----|
| siR_21493  | 0.01    | 12.5307 | 10.29125129  | 1.25E-105   | ** |
| siR_21497  | 2.3042  | 0.1119  | -4.363984    | 8.99E-16    | ** |
| siR_21506  | 1.2762  | 0.7832  | -0.70440177  | 0.074231739 |    |
| siR_215086 | 2.6942  | 0.01    | -8.07371315  | 9.10E-23    | ** |
| siR_215133 | 1.8788  | 0.01    | -7.55366769  | 4.29E-16    | ** |
| siR_215135 | 1.2053  | 0.01    | -6.91324847  | 1.40E-10    | ** |
| siR_21514  | 7.4445  | 6.3027  | -0.24020496  | 0.107200414 |    |
| siR_215143 | 1.0635  | 0.01    | -6.73267622  | 2.02E-09    | ** |
| siR_21516  | 1.6661  | 0.6713  | -1.31144545  | 0.00061799  | ** |
| siR_21530  | 3.1905  | 1.1561  | -1.46451634  | 2.25E-07    | ** |
| siR_215350 | 1.1344  | 0.01    | -6.82578563  | 5.32E-10    | ** |
| siR_215377 | 1.1344  | 0.01    | -6.82578563  | 5.32E-10    | ** |
| siR_215383 | 1.5952  | 0.01    | -7.31759351  | 8.99E-14    | ** |
| siR_21543  | 1.3471  | 0.3729  | -1.85299625  | 8.02E-05    | ** |
| siR_215447 | 2.9423  | 0.01    | -8.20080054  | 8.47E-25    | ** |
| siR_215450 | 2.2333  | 0.01    | -7.80303324  | 5.38E-19    | ** |
| siR_215460 | 2.6942  | 0.01    | -8.07371315  | 9.10E-23    | ** |
| siR_215529 | 3.0841  | 0.01    | -8.26870574  | 5.85E-26    | ** |
| siR_215595 | 1.9852  | 0.01    | -7.63314056  | 5.78E-17    | ** |
| siR_215632 | 1.1344  | 0.01    | -6.82578563  | 5.32E-10    | ** |
| siR_21565  | 4.6794  | 1.7155  | -1.44769443  | 4.73E-10    | ** |
| siR_215727 | 1.028   | 0.01    | -6.68369645  | 3.95E-09    | ** |
| siR_215767 | 1.7725  | 0.01    | -7.46964183  | 3.18E-15    | ** |
| siR_21579  | 1.2053  | 1.3053  | 0.11498914   | 0.739698816 |    |
| siR_215827 | 1.1344  | 0.01    | -6.82578563  | 5.32E-10    | ** |
| siR_21591  | 0.01    | 1.6409  | 7.35834351   | 1.79E-14    | ** |
| siR_215911 | 2.7651  | 0.01    | -8.11118786  | 2.39E-23    | ** |
| siR_216    | 1.028   | 0.1119  | -3.19955832  | 2.76E-06    | ** |
| siR_21610  | 3.1196  | 0.4848  | -2.68589945  | 2.88E-14    | ** |
| siR_21611  | 7.5154  | 1.3799  | -2.44528617  | 2.51E-29    | ** |
| siR_216113 | 2.5878  | 0.01    | -8.0155823   | 6.75E-22    | ** |
| siR_21613  | 1.5243  | 0.2238  | -2.76786493  | 8.43E-08    | ** |
| siR_21617  | 3.6868  | 0.2238  | -4.04208721  | 2.20E-23    | ** |
| siR_216198 | 1.2762  | 0.01    | -6.99571063  | 3.67E-11    | ** |
| siR_216259 | 4.6085  | 0.01    | -8.84815347  | 1.95E-38    | ** |
| siR_216338 | 1.737   | 0.01    | -7.44045394  | 6.21E-15    | ** |
| siR_216353 | 2.0561  | 0.01    | -7.68376661  | 1.52E-17    | ** |
| siR_216578 | 5.6365  | 0.01    | -9.13865581  | 7.51E-47    | ** |
| siR_216614 | 1.028   | 0.01    | -6.68369645  | 3.95E-09    | ** |
| siR_216624 | 1.3825  | 0.01    | -7.11113566  | 4.95E-12    | ** |
| siR_216631 | 2.3042  | 0.01    | -7.84812212  | 1.41E-19    | ** |
| siR_216646 | 1.7016  | 0.01    | -7.41074813  | 1.21E-14    | ** |
| siR_216656 | 2.2333  | 0.01    | -7.80303324  | 5.38E-19    | ** |
| siR_21666  | 3.155   | 1.0069  | -1.6477196   | 2.02E-08    | ** |
| siR_216660 | 64.3417 | 0.01    | -12.65153836 | 0           | ** |
| siR_216661 | 39.8457 | 0.01    | -11.96020838 | 0           | ** |
| siR_216662 | 5.3884  | 0.01    | -9.07371312  | 8.07E-45    | ** |

|            |          |        |              |           |    |
|------------|----------|--------|--------------|-----------|----|
| siR_216663 | 4.2185   | 0.01   | -8.72058632  | 3.03E-35  | ** |
| siR_216664 | 3.7577   | 0.01   | -8.5537061   | 1.79E-31  | ** |
| siR_216665 | 2.9778   | 0.01   | -8.21810305  | 4.34E-25  | ** |
| siR_21668  | 4.2894   | 1.8647 | -1.20183232  | 2.40E-07  | ** |
| siR_216697 | 2.4106   | 0.01   | -7.91324847  | 1.91E-20  | ** |
| siR_216703 | 3.864    | 0.01   | -8.59395129  | 2.42E-32  | ** |
| siR_216704 | 1.2053   | 0.01   | -6.91324847  | 1.40E-10  | ** |
| siR_216715 | 130.3849 | 0.01   | -13.67048914 | 0         | ** |
| siR_216716 | 53.5649  | 0.01   | -12.38707236 | 0         | ** |
| siR_216717 | 9.5006   | 0.01   | -9.89187482  | 1.77E-78  | ** |
| siR_216718 | 4.9275   | 0.01   | -8.94471205  | 4.77E-41  | ** |
| siR_216719 | 2.7651   | 0.01   | -8.11118786  | 2.39E-23  | ** |
| siR_216720 | 1.3825   | 0.01   | -7.11113566  | 4.95E-12  | ** |
| siR_216736 | 3.6513   | 0.01   | -8.51226639  | 1.33E-30  | ** |
| siR_216737 | 1.2762   | 0.01   | -6.99571063  | 3.67E-11  | ** |
| siR_21674  | 0.01     | 1.2307 | 6.94333532   | 4.86E-11  | ** |
| siR_216745 | 3.7931   | 0.01   | -8.56723361  | 9.20E-32  | ** |
| siR_216746 | 3.2259   | 0.01   | -8.33355791  | 4.04E-27  | ** |
| siR_216747 | 1.3471   | 0.01   | -7.07371314  | 9.66E-12  | ** |
| siR_216755 | 3.864    | 0.01   | -8.59395129  | 2.42E-32  | ** |
| siR_216778 | 3.155    | 0.01   | -8.3014962   | 1.54E-26  | ** |
| siR_216784 | 8.6498   | 0.01   | -9.75652296  | 1.63E-71  | ** |
| siR_216785 | 4.4312   | 0.01   | -8.79155366  | 5.51E-37  | ** |
| siR_216804 | 1.1698   | 0.01   | -6.87011809  | 2.73E-10  | ** |
| siR_216837 | 1.3825   | 0.01   | -7.11113566  | 4.95E-12  | ** |
| siR_2169   | 5.3175   | 1.0069 | -2.40082772  | 9.31E-21  | ** |
| siR_216904 | 56.0464  | 0.01   | -12.45240593 | 0         | ** |
| siR_21691  | 1.0989   | 0.1492 | -2.88074067  | 3.93E-06  | ** |
| siR_216984 | 1.5598   | 0.01   | -7.28521726  | 1.75E-13  | ** |
| siR_21700  | 0.01     | 1.2307 | 6.94333532   | 4.86E-11  | ** |
| siR_21703  | 0.01     | 1.6782 | 7.39077085   | 8.72E-15  | ** |
| siR_217086 | 4.963    | 0.01   | -8.95506867  | 2.45E-41  | ** |
| siR_217108 | 1.418    | 0.01   | -7.14771372  | 2.54E-12  | ** |
| siR_217164 | 3.4741   | 0.01   | -8.44049549  | 3.76E-29  | ** |
| siR_217170 | 1.6661   | 0.01   | -7.38033118  | 2.36E-14  | ** |
| siR_217171 | 2.0915   | 0.01   | -7.70839418  | 7.79E-18  | ** |
| siR_217182 | 2.446    | 0.01   | -7.93428061  | 9.77E-21  | ** |
| siR_217239 | 1.1344   | 0.01   | -6.82578563  | 5.32E-10  | ** |
| siR_217245 | 5.3884   | 0.01   | -9.07371312  | 8.07E-45  | ** |
| siR_217247 | 2.9778   | 0.01   | -8.21810305  | 4.34E-25  | ** |
| siR_217255 | 25.134   | 0.01   | -11.29542469 | 1.94E-206 | ** |
| siR_217256 | 14.1091  | 0.01   | -10.46241031 | 3.37E-116 | ** |
| siR_217257 | 6.5937   | 0.01   | -9.36494442  | 1.10E-54  | ** |
| siR_217258 | 4.1831   | 0.01   | -8.70842867  | 5.92E-35  | ** |
| siR_217269 | 1.1698   | 0.01   | -6.87011809  | 2.73E-10  | ** |
| siR_217270 | 2.127    | 0.01   | -7.73267621  | 3.99E-18  | ** |
| siR_217274 | 40.0939  | 0.01   | -11.96916704 | 0         | ** |



|            |          |        |              |           |    |
|------------|----------|--------|--------------|-----------|----|
| siR_217275 | 15.5271  | 0.01   | -10.60057261 | 8.34E-128 | ** |
| siR_217276 | 13.6482  | 0.01   | -10.41449488 | 1.99E-112 | ** |
| siR_217277 | 3.4386   | 0.01   | -8.42567749  | 7.34E-29  | ** |
| siR_217278 | 1.737    | 0.01   | -7.44045394  | 6.21E-15  | ** |
| siR_217287 | 14.0736  | 0.01   | -10.4587756  | 6.57E-116 | ** |
| siR_217288 | 11.8757  | 0.01   | -10.21379688 | 6.42E-98  | ** |
| siR_217289 | 2.1979   | 0.01   | -7.77998195  | 1.05E-18  | ** |
| siR_217296 | 10.5641  | 0.01   | -10.0449541  | 3.50E-87  | ** |
| siR_217309 | 1.2407   | 0.01   | -6.95501051  | 7.17E-11  | ** |
| siR_217310 | 77.3518  | 0.01   | -12.91721886 | 0         | ** |
| siR_217311 | 14.0736  | 0.01   | -10.4587756  | 6.57E-116 | ** |
| siR_217312 | 13.3646  | 0.01   | -10.38420088 | 4.18E-110 | ** |
| siR_217313 | 5.0693   | 0.01   | -8.98564277  | 3.30E-42  | ** |
| siR_217324 | 11.6985  | 0.01   | -10.19210792 | 1.81E-96  | ** |
| siR_217348 | 14.2863  | 0.01   | -10.48041661 | 1.19E-117 | ** |
| siR_217357 | 9.2524   | 0.01   | -9.85368377  | 1.90E-76  | ** |
| siR_217358 | 6.7355   | 0.01   | -9.39564121  | 7.60E-56  | ** |
| siR_217359 | 4.6439   | 0.01   | -8.85919308  | 1.00E-38  | ** |
| siR_217364 | 216.741  | 0.01   | -14.40368501 | 0         | ** |
| siR_217365 | 195.7546 | 0.01   | -14.25675768 | 0         | ** |
| siR_217366 | 34.3865  | 0.01   | -11.74762657 | 3.61E-282 | ** |
| siR_217367 | 13.9673  | 0.01   | -10.44783742 | 4.88E-115 | ** |
| siR_217368 | 4.9275   | 0.01   | -8.94471205  | 4.77E-41  | ** |
| siR_217369 | 2.836    | 0.01   | -8.14771372  | 6.28E-24  | ** |
| siR_217370 | 2.3397   | 0.01   | -7.87017976  | 7.25E-20  | ** |
| siR_217371 | 1.6661   | 0.01   | -7.38033118  | 2.36E-14  | ** |
| siR_217372 | 1.3471   | 0.01   | -7.07371314  | 9.66E-12  | ** |
| siR_217382 | 3.5804   | 0.01   | -8.48397698  | 5.07E-30  | ** |
| siR_217391 | 4.5021   | 0.01   | -8.81445427  | 1.45E-37  | ** |
| siR_217447 | 4.0413   | 0.01   | -8.65867564  | 8.57E-34  | ** |
| siR_217458 | 15.8816  | 0.01   | -10.6331405  | 1.05E-130 | ** |
| siR_217459 | 5.4593   | 0.01   | -9.09257214  | 2.12E-45  | ** |
| siR_21746  | 5.9201   | 2.3122 | -1.35635535  | 2.49E-11  | ** |
| siR_217477 | 16.4488  | 0.01   | -10.68376659 | 2.38E-135 | ** |
| siR_217478 | 2.2333   | 0.01   | -7.80303324  | 5.38E-19  | ** |
| siR_217479 | 1.028    | 0.01   | -6.68369645  | 3.95E-09  | ** |
| siR_217508 | 14.889   | 0.01   | -10.5400311  | 1.39E-122 | ** |
| siR_217509 | 7.8344   | 0.01   | -9.61367902  | 7.69E-65  | ** |
| siR_217519 | 1.4889   | 0.01   | -7.21810305  | 6.67E-13  | ** |
| siR_217537 | 4.9275   | 0.01   | -8.94471205  | 4.77E-41  | ** |
| siR_217538 | 2.8005   | 0.01   | -8.12954063  | 1.23E-23  | ** |
| siR_217547 | 1.2053   | 0.01   | -6.91324847  | 1.40E-10  | ** |
| siR_217564 | 1.3116   | 0.01   | -7.035184    | 1.88E-11  | ** |
| siR_217594 | 1.1698   | 0.01   | -6.87011809  | 2.73E-10  | ** |
| siR_217596 | 1.5952   | 0.01   | -7.31759351  | 8.99E-14  | ** |
| siR_217597 | 1.4534   | 0.01   | -7.18328801  | 1.30E-12  | ** |
| siR_217619 | 2.8714   | 0.01   | -8.16561052  | 3.22E-24  | ** |

|            |          |          |               |               |    |
|------------|----------|----------|---------------|---------------|----|
| siR_217652 | 1. 8079  | 0. 01    | -7. 49817107  | 1. 63E-15     | ** |
| siR_21766  | 17. 2641 | 8. 503   | -1. 02173128  | 7. 61E-20     | ** |
| siR_217664 | 1. 418   | 0. 01    | -7. 14771372  | 2. 54E-12     | ** |
| siR_217665 | 1. 6307  | 0. 01    | -7. 34934759  | 4. 61E-14     | ** |
| siR_217679 | 1. 3471  | 0. 01    | -7. 07371314  | 9. 66E-12     | ** |
| siR_21772  | 0. 01    | 3. 3192  | 8. 37469175   | 1. 60E-28     | ** |
| siR_217765 | 2. 9423  | 0. 01    | -8. 20080054  | 8. 47E-25     | ** |
| siR_217854 | 1. 2053  | 0. 01    | -6. 91324847  | 1. 40E-10     | ** |
| siR_217870 | 1. 737   | 0. 01    | -7. 44045394  | 6. 21E-15     | ** |
| siR_21795  | 4. 573   | 1. 8274  | -1. 32334846  | 8. 89E-09     | ** |
| siR_217961 | 1. 2762  | 0. 01    | -6. 99571063  | 3. 67E-11     | ** |
| siR_21797  | 14. 0027 | 14. 5446 | 0. 05477859   | 0. 594274615  |    |
| siR_21800  | 23. 7869 | 17. 9756 | -0. 40412734  | 2. 40E-06     |    |
| siR_21801  | 2. 6233  | 0. 7832  | -1. 74393013  | 1. 05E-07     | ** |
| siR_21805  | 8. 0826  | 5. 5941  | -0. 53091341  | 0. 000418463  |    |
| siR_218078 | 1. 3116  | 0. 01    | -7. 035184    | 1. 88E-11     | ** |
| siR_218093 | 5. 4947  | 0. 01    | -9. 10189688  | 1. 09E-45     | ** |
| siR_21816  | 0. 01    | 3. 6175  | 8. 49884921   | 5. 10E-31     | ** |
| siR_218179 | 2. 127   | 0. 01    | -7. 73267621  | 3. 99E-18     | ** |
| siR_2182   | 5. 6011  | 1. 1934  | -2. 2306325   | 4. 52E-20     | ** |
| siR_218205 | 37. 7542 | 0. 01    | -11. 88242139 | 423656612904e | ** |
| siR_218224 | 3. 0487  | 0. 01    | -8. 25205038  | 1. 14E-25     | ** |
| siR_218225 | 2. 446   | 0. 01    | -7. 93428061  | 9. 77E-21     | ** |
| siR_218243 | 1. 1698  | 0. 01    | -6. 87011809  | 2. 73E-10     | ** |
| siR_21830  | 1. 2407  | 0. 8578  | -0. 53244109  | 0. 170484507  |    |
| siR_218303 | 1. 1698  | 0. 01    | -6. 87011809  | 2. 73E-10     | ** |
| siR_21832  | 1. 8079  | 0. 8205  | -1. 13973964  | 0. 001387975  | ** |
| siR_218328 | 6. 8773  | 0. 01    | -9. 42569848  | 5. 25E-57     | ** |
| siR_218329 | 6. 3455  | 0. 01    | -9. 30959008  | 1. 18E-52     | ** |
| siR_218353 | 4. 4667  | 0. 01    | -8. 80306553  | 2. 82E-37     | ** |
| siR_218422 | 1. 418   | 0. 01    | -7. 14771372  | 2. 54E-12     | ** |
| siR_218426 | 2. 1979  | 0. 01    | -7. 77998195  | 1. 05E-18     | ** |
| siR_218452 | 2. 0915  | 0. 01    | -7. 70839418  | 7. 79E-18     | ** |
| siR_218467 | 2. 8714  | 0. 01    | -8. 16561052  | 3. 22E-24     | ** |
| siR_218468 | 1. 8079  | 0. 01    | -7. 49817107  | 1. 63E-15     | ** |
| siR_218503 | 1. 028   | 0. 01    | -6. 68369645  | 3. 95E-09     | ** |
| siR_218506 | 4. 6085  | 0. 01    | -8. 84815347  | 1. 95E-38     | ** |
| siR_218526 | 1. 9143  | 0. 01    | -7. 58067313  | 2. 20E-16     | ** |
| siR_218537 | 2. 5169  | 0. 01    | -7. 97550407  | 2. 57E-21     | ** |
| siR_218577 | 1. 7016  | 0. 01    | -7. 41074813  | 1. 21E-14     | ** |
| siR_218578 | 1. 9852  | 0. 01    | -7. 63314056  | 5. 78E-17     | ** |
| siR_218579 | 1. 7016  | 0. 01    | -7. 41074813  | 1. 21E-14     | ** |
| siR_218587 | 1. 7725  | 0. 01    | -7. 46964183  | 3. 18E-15     | ** |
| siR_218615 | 1. 6307  | 0. 01    | -7. 34934759  | 4. 61E-14     | ** |
| siR_21869  | 48. 3892 | 23. 7562 | -1. 026381    | 4. 61E-53     | ** |
| siR_21873  | 2. 5524  | 1. 529   | -0. 73926603  | 0. 008044773  |    |
| siR_218731 | 1. 0635  | 0. 01    | -6. 73267622  | 2. 02E-09     | ** |

|            |         |        |              |             |    |
|------------|---------|--------|--------------|-------------|----|
| siR_21887  | 0.01    | 2.3495 | 7.87620996   | 2.10E-20    | ** |
| siR_218875 | 1.0635  | 0.01   | -6.73267622  | 2.02E-09    | ** |
| siR_21899  | 0.01    | 1.9766 | 7.62687714   | 2.78E-17    | ** |
| siR_2190   | 0.01    | 1.0442 | 6.70625425   | 1.77E-09    | ** |
| siR_21903  | 0.01    | 4.699  | 8.87620996   | 4.51E-40    | ** |
| siR_219050 | 35.5563 | 0.01   | -11.79588955 | 9.59E-292   | ** |
| siR_219051 | 3.545   | 0.01   | -8.4696418   | 9.89E-30    | ** |
| siR_219070 | 7.5863  | 0.01   | -9.56725266  | 8.26E-63    | ** |
| siR_219075 | 23.5742 | 0.01   | -11.20299327 | 1.14E-193   | ** |
| siR_219076 | 1.0989  | 0.01   | -6.7799163   | 1.04E-09    | ** |
| siR_21908  | 24.5668 | 8.9505 | -1.45666977  | 6.73E-47    | ** |
| siR_219090 | 3.2968  | 0.01   | -8.36492254  | 1.06E-27    | ** |
| siR_2191   | 2.0561  | 1.3426 | -0.61488089  | 0.043498913 |    |
| siR_21910  | 0.01    | 4.6244 | 8.85312238   | 1.90E-39    | ** |
| siR_21911  | 0.01    | 1.0815 | 6.75688986   | 8.62E-10    | ** |
| siR_219121 | 1.2762  | 0.01   | -6.99571063  | 3.67E-11    | ** |
| siR_219216 | 10.4932 | 0.01   | -10.03523904 | 1.33E-86    | ** |
| siR_219257 | 13.4001 | 0.01   | -10.38802803 | 2.14E-110   | ** |
| siR_219288 | 1.3116  | 0.01   | -7.035184    | 1.88E-11    | ** |
| siR_21929  | 5.8847  | 2.9462 | -0.9981135   | 1.87E-07    |    |
| siR_219322 | 1.028   | 0.01   | -6.68369645  | 3.95E-09    | ** |
| siR_219326 | 3.6159  | 0.01   | -8.49821097  | 2.60E-30    | ** |
| siR_219327 | 2.5878  | 0.01   | -8.0155823   | 6.75E-22    | ** |
| siR_219335 | 4.254   | 0.01   | -8.73267624  | 1.56E-35    | ** |
| siR_21934  | 1.1344  | 1.3799 | 0.28263428   | 0.417966702 |    |
| siR_219345 | 1.5952  | 0.01   | -7.31759351  | 8.99E-14    | ** |
| siR_219476 | 1.2053  | 0.01   | -6.91324847  | 1.40E-10    | ** |
| siR_219483 | 1.418   | 0.01   | -7.14771372  | 2.54E-12    | ** |
| siR_21951  | 0.01    | 4.1769 | 8.70628879   | 1.06E-35    | ** |
| siR_219532 | 1.8788  | 0.01   | -7.55366769  | 4.29E-16    | ** |
| siR_219535 | 2.2333  | 0.01   | -7.80303324  | 5.38E-19    | ** |
| siR_219538 | 7.3381  | 0.01   | -9.51926273  | 8.87E-61    | ** |
| siR_219583 | 3.8995  | 0.01   | -8.60714536  | 1.24E-32    | ** |
| siR_219588 | 4.3603  | 0.01   | -8.76828358  | 2.10E-36    | ** |
| siR_219653 | 1.8788  | 0.01   | -7.55366769  | 4.29E-16    | ** |
| siR_219738 | 1.1344  | 0.01   | -6.82578563  | 5.32E-10    | ** |
| siR_219749 | 7.0545  | 0.01   | -9.46240003  | 1.86E-58    | ** |
| siR_219778 | 2.3042  | 0.01   | -7.84812212  | 1.41E-19    | ** |
| siR_219787 | 3.3677  | 0.01   | -8.39561983  | 2.79E-28    | ** |
| siR_219858 | 2.5169  | 0.01   | -7.97550407  | 2.57E-21    | ** |
| siR_219876 | 1.028   | 0.01   | -6.68369645  | 3.95E-09    | ** |
| siR_220082 | 1.1698  | 0.01   | -6.87011809  | 2.73E-10    | ** |
| siR_22010  | 1.1344  | 0.5221 | -1.11953137  | 0.013060942 | *  |
| siR_220252 | 7.7635  | 0.01   | -9.60056343  | 2.92E-64    | ** |
| siR_220256 | 2.446   | 0.01   | -7.93428061  | 9.77E-21    | ** |
| siR_220261 | 9.6069  | 0.01   | -9.90792717  | 2.39E-79    | ** |
| siR_220266 | 4.3603  | 0.01   | -8.76828358  | 2.10E-36    | ** |

|            |         |        |              |             |    |
|------------|---------|--------|--------------|-------------|----|
| siR_220277 | 4.9984  | 0.01   | -8.96532255  | 1.25E-41    | ** |
| siR_220278 | 2.5878  | 0.01   | -8.0155823   | 6.75E-22    | ** |
| siR_220279 | 1.6307  | 0.01   | -7.34934759  | 4.61E-14    | ** |
| siR_220292 | 4.5376  | 0.01   | -8.82578561  | 7.42E-38    | ** |
| siR_220316 | 2.127   | 0.01   | -7.73267621  | 3.99E-18    | ** |
| siR_220378 | 1.0989  | 0.01   | -6.7799163   | 1.04E-09    | ** |
| siR_220389 | 2.6942  | 0.01   | -8.07371315  | 9.10E-23    | ** |
| siR_220420 | 1.2407  | 0.01   | -6.95501051  | 7.17E-11    | ** |
| siR_220436 | 1.0989  | 0.01   | -6.7799163   | 1.04E-09    | ** |
| siR_220684 | 2.8714  | 0.01   | -8.16561052  | 3.22E-24    | ** |
| siR_220714 | 1.028   | 0.01   | -6.68369645  | 3.95E-09    | ** |
| siR_22080  | 1.028   | 0.7832 | -0.39238759  | 0.347659208 |    |
| siR_220829 | 1.6307  | 0.01   | -7.34934759  | 4.61E-14    | ** |
| siR_220920 | 5.7074  | 0.01   | -9.15668986  | 1.97E-47    | ** |
| siR_221020 | 17.4414 | 0.01   | -10.76830006 | 1.79E-143   | ** |
| siR_221022 | 2.8005  | 0.01   | -8.12954063  | 1.23E-23    | ** |
| siR_22109  | 4.9275  | 3.0954 | -0.67073002  | 0.000693883 |    |
| siR_221090 | 1.4534  | 0.01   | -7.18328801  | 1.30E-12    | ** |
| siR_221095 | 1.3116  | 0.01   | -7.035184    | 1.88E-11    | ** |
| siR_221103 | 1.3825  | 0.01   | -7.11113566  | 4.95E-12    | ** |
| siR_22111  | 2.8714  | 1.0442 | -1.45935626  | 9.80E-07    | ** |
| siR_221122 | 6.5582  | 0.01   | -9.35715612  | 2.15E-54    | ** |
| siR_22117  | 1.2407  | 0.5967 | -1.05607663  | 0.013149564 | *  |
| siR_221202 | 2.0561  | 0.01   | -7.68376661  | 1.52E-17    | ** |
| siR_221239 | 2.4815  | 0.01   | -7.95506863  | 5.01E-21    | ** |
| siR_221281 | 4.5021  | 0.01   | -8.81445427  | 1.45E-37    | ** |
| siR_22144  | 0.01    | 1.2307 | 6.94333532   | 4.86E-11    | ** |
| siR_221593 | 1.3825  | 0.01   | -7.11113566  | 4.95E-12    | ** |
| siR_221599 | 9.0043  | 0.01   | -9.81447031  | 2.04E-74    | ** |
| siR_221600 | 1.2407  | 0.01   | -6.95501051  | 7.17E-11    | ** |
| siR_221654 | 2.5169  | 0.01   | -7.97550407  | 2.57E-21    | ** |
| siR_221766 | 2.8714  | 0.01   | -8.16561052  | 3.22E-24    | ** |
| siR_221780 | 1.2053  | 0.01   | -6.91324847  | 1.40E-10    | ** |
| siR_221797 | 1.7016  | 0.01   | -7.41074813  | 1.21E-14    | ** |
| siR_221806 | 1.028   | 0.01   | -6.68369645  | 3.95E-09    | ** |
| siR_221810 | 2.2333  | 0.01   | -7.80303324  | 5.38E-19    | ** |
| siR_221820 | 1.5243  | 0.01   | -7.25200305  | 3.42E-13    | ** |
| siR_221823 | 2.8714  | 0.01   | -8.16561052  | 3.22E-24    | ** |
| siR_221828 | 1.7725  | 0.01   | -7.46964183  | 3.18E-15    | ** |
| siR_221829 | 1.2407  | 0.01   | -6.95501051  | 7.17E-11    | ** |
| siR_22183  | 1.028   | 0.1865 | -2.46259273  | 4.21E-05    | ** |
| siR_22184  | 1.4534  | 0.3356 | -2.11461719  | 7.80E-06    | ** |
| siR_221851 | 10.4223 | 0.01   | -10.02545799 | 5.06E-86    | ** |
| siR_221947 | 3.0841  | 0.01   | -8.26870574  | 5.85E-26    | ** |
| siR_221965 | 1.5598  | 0.01   | -7.28521726  | 1.75E-13    | ** |
| siR_221982 | 1.2762  | 0.01   | -6.99571063  | 3.67E-11    | ** |
| siR_222018 | 3.2614  | 0.01   | -8.34934759  | 2.07E-27    | ** |

|            |          |        |              |             |    |
|------------|----------|--------|--------------|-------------|----|
| siR_222026 | 4.4312   | 0.01   | -8.79155366  | 5.51E-37    | ** |
| siR_222043 | 1.2762   | 0.01   | -6.99571063  | 3.67E-11    | ** |
| siR_222094 | 42.7172  | 0.01   | -12.06060162 | 0           | ** |
| siR_222104 | 1.8079   | 0.01   | -7.49817107  | 1.63E-15    | ** |
| siR_222132 | 1.5598   | 0.01   | -7.28521726  | 1.75E-13    | ** |
| siR_222163 | 4.0413   | 0.01   | -8.65867564  | 8.57E-34    | ** |
| siR_222218 | 2.5524   | 0.01   | -7.99571063  | 1.32E-21    | ** |
| siR_222255 | 1.7016   | 0.01   | -7.41074813  | 1.21E-14    | ** |
| siR_222261 | 1.6661   | 0.01   | -7.38033118  | 2.36E-14    | ** |
| siR_222280 | 1.0635   | 0.01   | -6.73267622  | 2.02E-09    | ** |
| siR_222284 | 5.5656   | 0.01   | -9.12039339  | 2.86E-46    | ** |
| siR_222323 | 1.028    | 0.01   | -6.68369645  | 3.95E-09    | ** |
| siR_222340 | 3.0487   | 0.01   | -8.25205038  | 1.14E-25    | ** |
| siR_222468 | 1.737    | 0.01   | -7.44045394  | 6.21E-15    | ** |
| siR_222477 | 2.1979   | 0.01   | -7.77998195  | 1.05E-18    | ** |
| siR_222525 | 1.0635   | 0.01   | -6.73267622  | 2.02E-09    | ** |
| siR_222600 | 1.5243   | 0.01   | -7.25200305  | 3.42E-13    | ** |
| siR_22261  | 1.0635   | 0.5221 | -1.02642197  | 0.025238991 | *  |
| siR_222646 | 1.1698   | 0.01   | -6.87011809  | 2.73E-10    | ** |
| siR_222675 | 1.1344   | 0.01   | -6.82578563  | 5.32E-10    | ** |
| siR_222690 | 5.5656   | 0.01   | -9.12039339  | 2.86E-46    | ** |
| siR_222694 | 1.4534   | 0.01   | -7.18328801  | 1.30E-12    | ** |
| siR_222708 | 21.4118  | 0.01   | -11.06419036 | 5.69E-176   | ** |
| siR_222750 | 5.8138   | 0.01   | -9.18333764  | 2.66E-48    | ** |
| siR_222760 | 1.7725   | 0.01   | -7.46964183  | 3.18E-15    | ** |
| siR_222782 | 149.9179 | 0.01   | -13.8718845  | 0           | ** |
| siR_222783 | 1.3825   | 0.01   | -7.11113566  | 4.95E-12    | ** |
| siR_222787 | 7.4445   | 0.01   | -9.5400311   | 1.20E-61    | ** |
| siR_222823 | 1.8788   | 0.01   | -7.55366769  | 4.29E-16    | ** |
| siR_222836 | 2.2688   | 0.01   | -7.82578561  | 2.76E-19    | ** |
| siR_222846 | 2.3397   | 0.01   | -7.87017976  | 7.25E-20    | ** |
| siR_22285  | 0.01     | 9.0624 | 9.82374936   | 1.35E-76    | ** |
| siR_222855 | 1.5952   | 0.01   | -7.31759351  | 8.99E-14    | ** |
| siR_222858 | 8.508    | 0.01   | -9.73267618  | 2.36E-70    | ** |
| siR_222865 | 1.6307   | 0.01   | -7.34934759  | 4.61E-14    | ** |
| siR_2229   | 4.5376   | 2.9835 | -0.60492366  | 0.002991419 |    |
| siR_22290  | 0.01     | 1.2307 | 6.94333532   | 4.86E-11    | ** |
| siR_222905 | 1.2053   | 0.01   | -6.91324847  | 1.40E-10    | ** |
| siR_222913 | 2.7651   | 0.01   | -8.11118786  | 2.39E-23    | ** |
| siR_222932 | 1.6307   | 0.01   | -7.34934759  | 4.61E-14    | ** |
| siR_22294  | 0.01     | 6.601  | 9.36654079   | 5.41E-56    | ** |
| siR_222957 | 2.6233   | 0.01   | -8.035239    | 3.46E-22    | ** |
| siR_222989 | 1.0635   | 0.01   | -6.73267622  | 2.02E-09    | ** |
| siR_222998 | 1.2407   | 0.01   | -6.95501051  | 7.17E-11    | ** |
| siR_223006 | 1.028    | 0.01   | -6.68369645  | 3.95E-09    | ** |
| siR_223007 | 6.1328   | 0.01   | -9.26040207  | 6.51E-51    | ** |
| siR_223010 | 2.3397   | 0.01   | -7.87017976  | 7.25E-20    | ** |

|            |         |         |              |             |    |
|------------|---------|---------|--------------|-------------|----|
| siR_223018 | 3.5804  | 0.01    | -8.48397698  | 5.07E-30    | ** |
| siR_223038 | 3.3323  | 0.01    | -8.38037447  | 5.44E-28    | ** |
| siR_223042 | 4.2185  | 0.01    | -8.72058632  | 3.03E-35    | ** |
| siR_223054 | 1.2407  | 0.01    | -6.95501051  | 7.17E-11    | ** |
| siR_223068 | 15.2789 | 0.01    | -10.57732492 | 8.96E-126   | ** |
| siR_22307  | 0.9571  | 1.1934  | 0.31833611   | 0.399748725 |    |
| siR_223116 | 16.0943 | 0.01    | -10.65233409 | 1.90E-132   | ** |
| siR_22313  | 0.01    | 1.9766  | 7.62687714   | 2.78E-17    | ** |
| siR_223131 | 1.3471  | 0.01    | -7.07371314  | 9.66E-12    | ** |
| siR_223133 | 1.418   | 0.01    | -7.14771372  | 2.54E-12    | ** |
| siR_223138 | 3.7577  | 0.01    | -8.5537061   | 1.79E-31    | ** |
| siR_223153 | 9.1461  | 0.01    | -9.83701288  | 1.41E-75    | ** |
| siR_223166 | 4.8566  | 0.01    | -8.92380283  | 1.82E-40    | ** |
| siR_22322  | 5.2111  | 3.6548  | -0.51179548  | 0.006200428 |    |
| siR_223268 | 2.7651  | 0.01    | -8.11118786  | 2.39E-23    | ** |
| siR_223296 | 1.1698  | 0.01    | -6.87011809  | 2.73E-10    | ** |
| siR_223321 | 2.7651  | 0.01    | -8.11118786  | 2.39E-23    | ** |
| siR_223329 | 1.0635  | 0.01    | -6.73267622  | 2.02E-09    | ** |
| siR_223333 | 1.2053  | 0.01    | -6.91324847  | 1.40E-10    | ** |
| siR_223338 | 3.4386  | 0.01    | -8.42567749  | 7.34E-29    | ** |
| siR_223343 | 16.7324 | 0.01    | -10.70842867 | 1.14E-137   | ** |
| siR_223344 | 1.1698  | 0.01    | -6.87011809  | 2.73E-10    | ** |
| siR_223358 | 1.2053  | 0.01    | -6.91324847  | 1.40E-10    | ** |
| siR_223363 | 3.545   | 0.01    | -8.4696418   | 9.89E-30    | ** |
| siR_22342  | 1.3471  | 0.5221  | -1.36745889  | 0.001524084 | ** |
| siR_223475 | 10.635  | 0.01    | -10.0546043  | 9.19E-88    | ** |
| siR_2236   | 0.01    | 1.1188  | 6.80580835   | 4.20E-10    | ** |
| siR_223630 | 5.8138  | 0.01    | -9.18333764  | 2.66E-48    | ** |
| siR_223698 | 2.5878  | 0.01    | -8.0155823   | 6.75E-22    | ** |
| siR_223706 | 1.2407  | 0.01    | -6.95501051  | 7.17E-11    | ** |
| siR_223744 | 1.8434  | 0.01    | -7.52622535  | 8.37E-16    | ** |
| siR_223783 | 1.0635  | 0.01    | -6.73267622  | 2.02E-09    | ** |
| siR_223809 | 26.3039 | 0.01    | -11.36106086 | 5.17E-216   | ** |
| siR_223844 | 1.9143  | 0.01    | -7.58067313  | 2.20E-16    | ** |
| siR_223857 | 11.6276 | 0.01    | -10.18333764 | 6.90E-96    | ** |
| siR_223865 | 1.737   | 0.01    | -7.44045394  | 6.21E-15    | ** |
| siR_223941 | 11.663  | 0.01    | -10.18772327 | 3.54E-96    | ** |
| siR_223961 | 7.7281  | 0.01    | -9.59396997  | 5.71E-64    | ** |
| siR_223969 | 1.3471  | 0.01    | -7.07371314  | 9.66E-12    | ** |
| siR_223972 | 5.6011  | 0.01    | -9.12956637  | 1.46E-46    | ** |
| siR_224058 | 13.7546 | 0.01    | -10.42569848 | 2.69E-113   | ** |
| siR_224066 | 14.7117 | 0.01    | -10.52274825 | 3.94E-121   | ** |
| siR_224067 | 2.0915  | 0.01    | -7.70839418  | 7.79E-18    | ** |
| siR_22408  | 19.8874 | 10.9644 | -0.85902781  | 2.53E-17    |    |
| siR_224095 | 1.2762  | 0.01    | -6.99571063  | 3.67E-11    | ** |
| siR_224097 | 1.5598  | 0.01    | -7.28521726  | 1.75E-13    | ** |
| siR_224099 | 3.7222  | 0.01    | -8.54001177  | 3.50E-31    | ** |

|            |         |         |              |             |    |
|------------|---------|---------|--------------|-------------|----|
| siR_224144 | 1.0635  | 0.01    | -6.73267622  | 2.02E-09    | ** |
| siR_224146 | 4.7503  | 0.01    | -8.89187482  | 1.35E-39    | ** |
| siR_224150 | 1.6307  | 0.01    | -7.34934759  | 4.61E-14    | ** |
| siR_224152 | 5.8492  | 0.01    | -9.19209551  | 1.36E-48    | ** |
| siR_224166 | 7.409   | 0.01    | -9.53313504  | 2.33E-61    | ** |
| siR_224188 | 5.1402  | 0.01    | -9.00568068  | 8.67E-43    | ** |
| siR_22423  | 5.4947  | 3.5056  | -0.64837933  | 0.000506673 |    |
| siR_224231 | 1.2407  | 0.01    | -6.95501051  | 7.17E-11    | ** |
| siR_22428  | 1.8434  | 0.3729  | -2.30550845  | 9.97E-08    | ** |
| siR_224318 | 6.5228  | 0.01    | -9.34934754  | 4.18E-54    | ** |
| siR_224336 | 2.6942  | 0.01    | -8.07371315  | 9.10E-23    | ** |
| siR_224358 | 1.0635  | 0.01    | -6.73267622  | 2.02E-09    | ** |
| siR_22438  | 0.01    | 15.8499 | 10.63025802  | 2.05E-133   | ** |
| siR_224418 | 1.8788  | 0.01    | -7.55366769  | 4.29E-16    | ** |
| siR_22444  | 6.7355  | 1.5663  | -2.10442448  | 2.84E-22    | ** |
| siR_224495 | 10.245  | 0.01    | -10.00070426 | 1.43E-84    | ** |
| siR_224585 | 1.2407  | 0.01    | -6.95501051  | 7.17E-11    | ** |
| siR_224594 | 5.1402  | 0.01    | -9.00568068  | 8.67E-43    | ** |
| siR_22467  | 1.6307  | 0.4848  | -1.75002979  | 2.87E-05    | ** |
| siR_224702 | 15.5625 | 0.01    | -10.60385808 | 4.28E-128   | ** |
| siR_224704 | 1.3825  | 0.01    | -7.11113566  | 4.95E-12    | ** |
| siR_224730 | 1.0635  | 0.01    | -6.73267622  | 2.02E-09    | ** |
| siR_224737 | 3.8995  | 0.01    | -8.60714536  | 1.24E-32    | ** |
| siR_22480  | 1.6661  | 0.7086  | -1.23343162  | 0.001096727 | ** |
| siR_224814 | 10.8122 | 0.01    | -10.07844431 | 3.25E-89    | ** |
| siR_224821 | 2.4815  | 0.01    | -7.95506863  | 5.01E-21    | ** |
| siR_224835 | 2.0206  | 0.01    | -7.65863995  | 2.96E-17    | ** |
| siR_224841 | 1.5952  | 0.01    | -7.31759351  | 8.99E-14    | ** |
| siR_22486  | 0.01    | 1.4545  | 7.18437949   | 6.51E-13    | ** |
| siR_224873 | 8.3307  | 0.01    | -9.70229394  | 6.66E-69    | ** |
| siR_224907 | 2.2688  | 0.01    | -7.82578561  | 2.76E-19    | ** |
| siR_22491  | 0.01    | 1.8274  | 7.51364865   | 4.92E-16    | ** |
| siR_224943 | 1.1698  | 0.01    | -6.87011809  | 2.73E-10    | ** |
| siR_224953 | 8.2953  | 0.01    | -9.69615036  | 1.30E-68    | ** |
| siR_224980 | 24.3187 | 0.01    | -11.24785036 | 9.16E-200   | ** |
| siR_22505  | 11.9112 | 9.8829  | -0.26931242  | 0.02288785  |    |
| siR_225051 | 1.6307  | 0.01    | -7.34934759  | 4.61E-14    | ** |
| siR_225064 | 1.5598  | 0.01    | -7.28521726  | 1.75E-13    | ** |
| siR_22507  | 2.0206  | 1.7901  | -0.17474357  | 0.540169116 |    |
| siR_225133 | 1.6661  | 0.01    | -7.38033118  | 2.36E-14    | ** |
| siR_225171 | 25.8785 | 0.01    | -11.33753813 | 1.57E-212   | ** |
| siR_225196 | 9.9614  | 0.01    | -9.96020464  | 2.99E-82    | ** |
| siR_225202 | 1.3471  | 0.01    | -7.07371314  | 9.66E-12    | ** |
| siR_225231 | 1.5952  | 0.01    | -7.31759351  | 8.99E-14    | ** |
| siR_225235 | 1.4889  | 0.01    | -7.21810305  | 6.67E-13    | ** |
| siR_225271 | 1.2762  | 0.01    | -6.99571063  | 3.67E-11    | ** |
| siR_225378 | 56.5427 | 0.01    | -12.46512498 | 0           | ** |

|            |         |         |              |             |    |
|------------|---------|---------|--------------|-------------|----|
| siR_225379 | 4.2185  | 0.01    | -8.72058632  | 3.03E-35    | ** |
| siR_225387 | 19.8874 | 0.01    | -10.95763907 | 1.71E-163   | ** |
| siR_225388 | 1.2407  | 0.01    | -6.95501051  | 7.17E-11    | ** |
| siR_2254   | 3.3677  | 2.0512  | -0.71529546  | 0.003048329 |    |
| siR_22541  | 0.01    | 2.0512  | 7.68032436   | 6.59E-18    | ** |
| siR_225410 | 5.9201  | 0.01    | -9.2094777   | 3.58E-49    | ** |
| siR_225412 | 4.6794  | 0.01    | -8.87017976  | 5.13E-39    | ** |
| siR_225453 | 1.6661  | 0.01    | -7.38033118  | 2.36E-14    | ** |
| siR_225607 | 1.6307  | 0.01    | -7.34934759  | 4.61E-14    | ** |
| siR_225670 | 1.1344  | 0.01    | -6.82578563  | 5.32E-10    | ** |
| siR_225706 | 1.0989  | 0.01    | -6.7799163   | 1.04E-09    | ** |
| siR_22571  | 0.01    | 1.3799  | 7.10841991   | 2.74E-12    | ** |
| siR_225712 | 2.0561  | 0.01    | -7.68376661  | 1.52E-17    | ** |
| siR_225716 | 1.2762  | 0.01    | -6.99571063  | 3.67E-11    | ** |
| siR_225814 | 1.1344  | 0.01    | -6.82578563  | 5.32E-10    | ** |
| siR_225865 | 1.0635  | 0.01    | -6.73267622  | 2.02E-09    | ** |
| siR_225897 | 1.028   | 0.01    | -6.68369645  | 3.95E-09    | ** |
| siR_225909 | 2.5878  | 0.01    | -8.0155823   | 6.75E-22    | ** |
| siR_225912 | 2.2688  | 0.01    | -7.82578561  | 2.76E-19    | ** |
| siR_22595  | 0.01    | 1.3426  | 7.06888574   | 5.63E-12    | ** |
| siR_226043 | 1.3471  | 0.01    | -7.07371314  | 9.66E-12    | ** |
| siR_22612  | 6.2392  | 5.333   | -0.22641373  | 0.163756368 |    |
| siR_226168 | 20.6673 | 0.01    | -11.01313433 | 7.05E-170   | ** |
| siR_226190 | 1.2407  | 0.01    | -6.95501051  | 7.17E-11    | ** |
| siR_226196 | 2.4815  | 0.01    | -7.95506863  | 5.01E-21    | ** |
| siR_226197 | 1.4534  | 0.01    | -7.18328801  | 1.30E-12    | ** |
| siR_22625  | 20.9864 | 10.6288 | -0.98147598  | 2.31E-22    |    |
| siR_226274 | 1.2053  | 0.01    | -6.91324847  | 1.40E-10    | ** |
| siR_22629  | 0.01    | 15.2532 | 10.57489623  | 2.03E-128   | ** |
| siR_22635  | 1.5598  | 1.3799  | -0.17679734  | 0.587407247 |    |
| siR_226413 | 2.3751  | 0.01    | -7.89184446  | 3.72E-20    | ** |
| siR_22643  | 42.5754 | 5.5195  | -2.9474106   | 4.32E-194   | ** |
| siR_226449 | 1.4889  | 0.01    | -7.21810305  | 6.67E-13    | ** |
| siR_226474 | 1.2762  | 0.01    | -6.99571063  | 3.67E-11    | ** |
| siR_22650  | 1.0635  | 0.9323  | -0.18995386  | 0.633240136 |    |
| siR_226518 | 1.9852  | 0.01    | -7.63314056  | 5.78E-17    | ** |
| siR_226522 | 1.1698  | 0.01    | -6.87011809  | 2.73E-10    | ** |
| siR_226529 | 1.028   | 0.01    | -6.68369645  | 3.95E-09    | ** |
| siR_226537 | 2.6233  | 0.01    | -8.035239    | 3.46E-22    | ** |
| siR_226558 | 1.0989  | 0.01    | -6.7799163   | 1.04E-09    | ** |
| siR_226560 | 2.4815  | 0.01    | -7.95506863  | 5.01E-21    | ** |
| siR_226601 | 1.6661  | 0.01    | -7.38033118  | 2.36E-14    | ** |
| siR_226618 | 1.5598  | 0.01    | -7.28521726  | 1.75E-13    | ** |
| siR_22663  | 1.1698  | 0.4475  | -1.38630231  | 0.002893159 | ** |
| siR_226651 | 5.8492  | 0.01    | -9.19209551  | 1.36E-48    | ** |
| siR_226653 | 4.7148  | 0.01    | -8.88105279  | 2.63E-39    | ** |
| siR_226667 | 1.5243  | 0.01    | -7.25200305  | 3.42E-13    | ** |



|            |          |          |              |              |    |
|------------|----------|----------|--------------|--------------|----|
| siR_226668 | 1. 2053  | 0. 01    | -6. 91324847 | 1. 40E-10    | ** |
| siR_226686 | 1. 0635  | 0. 01    | -6. 73267622 | 2. 02E-09    | ** |
| siR_226705 | 3. 6868  | 0. 01    | -8. 52622535 | 6. 83E-31    | ** |
| siR_226721 | 3. 9349  | 0. 01    | -8. 62018319 | 6. 36E-33    | ** |
| siR_22673  | 2. 2688  | 1. 4172  | -0. 67888607 | 0. 020490203 |    |
| siR_226734 | 3. 6159  | 0. 01    | -8. 49821097 | 2. 60E-30    | ** |
| siR_226752 | 2. 8005  | 0. 01    | -8. 12954063 | 1. 23E-23    | ** |
| siR_226766 | 1. 4889  | 0. 01    | -7. 21810305 | 6. 67E-13    | ** |
| siR_226772 | 7. 9408  | 0. 01    | -9. 6331405  | 1. 04E-65    | ** |
| siR_226788 | 2. 5169  | 0. 01    | -7. 97550407 | 2. 57E-21    | ** |
| siR_22679  | 3. 2968  | 1. 4918  | -1. 14401224 | 1. 37E-05    | ** |
| siR_226795 | 2. 0561  | 0. 01    | -7. 68376661 | 1. 52E-17    | ** |
| siR_22680  | 5. 282   | 6. 5637  | 0. 313425    | 0. 050727551 |    |
| siR_226812 | 1. 4534  | 0. 01    | -7. 18328801 | 1. 30E-12    | ** |
| siR_226843 | 1. 5952  | 0. 01    | -7. 31759351 | 8. 99E-14    | ** |
| siR_226864 | 1. 9143  | 0. 01    | -7. 58067313 | 2. 20E-16    | ** |
| siR_226874 | 2. 2333  | 0. 01    | -7. 80303324 | 5. 38E-19    | ** |
| siR_22690  | 1. 0635  | 1. 0069  | -0. 07889962 | 0. 841808282 |    |
| siR_22709  | 1. 418   | 0. 7459  | -0. 9268034  | 0. 017122488 |    |
| siR_227099 | 2. 0561  | 0. 01    | -7. 68376661 | 1. 52E-17    | ** |
| siR_227107 | 4. 5021  | 0. 01    | -8. 81445427 | 1. 45E-37    | ** |
| siR_227155 | 1. 1344  | 0. 01    | -6. 82578563 | 5. 32E-10    | ** |
| siR_227174 | 1. 7725  | 0. 01    | -7. 46964183 | 3. 18E-15    | ** |
| siR_227182 | 1. 4534  | 0. 01    | -7. 18328801 | 1. 30E-12    | ** |
| siR_227202 | 8. 2244  | 0. 01    | -9. 68376659 | 4. 94E-68    | ** |
| siR_22721  | 0. 01    | 1. 0069  | 6. 6537766   | 3. 63E-09    | ** |
| siR_22722  | 0. 01    | 17. 5281 | 10. 7754539  | 1. 84E-147   | ** |
| siR_22728  | 12. 4784 | 4. 3261  | -1. 52829404 | 2. 59E-26    | ** |
| siR_227289 | 1. 1698  | 0. 01    | -6. 87011809 | 2. 73E-10    | ** |
| siR_227293 | 2. 5524  | 0. 01    | -7. 99571063 | 1. 32E-21    | ** |
| siR_227309 | 2. 836   | 0. 01    | -8. 14771372 | 6. 28E-24    | ** |
| siR_227350 | 1. 028   | 0. 01    | -6. 68369645 | 3. 95E-09    | ** |
| siR_227396 | 2. 446   | 0. 01    | -7. 93428061 | 9. 77E-21    | ** |
| siR_22740  | 0. 01    | 1. 3426  | 7. 06888574  | 5. 63E-12    | ** |
| siR_227406 | 3. 4032  | 0. 01    | -8. 41074813 | 1. 43E-28    | ** |
| siR_227421 | 6. 3455  | 0. 01    | -9. 30959008 | 1. 18E-52    | ** |
| siR_227432 | 1. 418   | 0. 01    | -7. 14771372 | 2. 54E-12    | ** |
| siR_22747  | 8. 0471  | 3. 2819  | -1. 29393768 | 5. 91E-14    | ** |
| siR_227495 | 1. 2407  | 0. 01    | -6. 95501051 | 7. 17E-11    | ** |
| siR_22750  | 0. 01    | 2. 6106  | 8. 02823761  | 1. 37E-22    | ** |
| siR_227537 | 2. 3751  | 0. 01    | -7. 89184446 | 3. 72E-20    | ** |
| siR_227583 | 1. 1698  | 0. 01    | -6. 87011809 | 2. 73E-10    | ** |
| siR_227591 | 3. 0841  | 0. 01    | -8. 26870574 | 5. 85E-26    | ** |
| siR_22760  | 1. 418   | 0. 2611  | -2. 44118317 | 1. 47E-06    | ** |
| siR_227638 | 1. 028   | 0. 01    | -6. 68369645 | 3. 95E-09    | ** |
| siR_227675 | 3. 6513  | 0. 01    | -8. 51226639 | 1. 33E-30    | ** |
| siR_227704 | 3. 6159  | 0. 01    | -8. 49821097 | 2. 60E-30    | ** |

|            |         |        |              |             |    |
|------------|---------|--------|--------------|-------------|----|
| siR_227754 | 4.963   | 0.01   | -8.95506867  | 2.45E-41    | ** |
| siR_227773 | 1.4889  | 0.01   | -7.21810305  | 6.67E-13    | ** |
| siR_227779 | 1.3116  | 0.01   | -7.035184    | 1.88E-11    | ** |
| siR_227797 | 2.3751  | 0.01   | -7.89184446  | 3.72E-20    | ** |
| siR_227801 | 4.2185  | 0.01   | -8.72058632  | 3.03E-35    | ** |
| siR_227825 | 2.4106  | 0.01   | -7.91324847  | 1.91E-20    | ** |
| siR_227828 | 1.6307  | 0.01   | -7.34934759  | 4.61E-14    | ** |
| siR_22783  | 1.3116  | 0.7459 | -0.81427367  | 0.04007629  |    |
| siR_227834 | 1.6661  | 0.01   | -7.38033118  | 2.36E-14    | ** |
| siR_22784  | 4.4667  | 2.0512 | -1.12274119  | 5.93E-07    | ** |
| siR_227852 | 1.028   | 0.01   | -6.68369645  | 3.95E-09    | ** |
| siR_227853 | 2.0915  | 0.01   | -7.70839418  | 7.79E-18    | ** |
| siR_227880 | 26.8002 | 0.01   | -11.38802822 | 4.48E-220   | ** |
| siR_227934 | 4.6794  | 0.01   | -8.87017976  | 5.13E-39    | ** |
| siR_22797  | 13.1874 | 9.6218 | -0.45478144  | 9.04E-05    |    |
| siR_227970 | 4.4667  | 0.01   | -8.80306553  | 2.82E-37    | ** |
| siR_227974 | 1.9852  | 0.01   | -7.63314056  | 5.78E-17    | ** |
| siR_22802  | 1.9143  | 1.6782 | -0.18990228  | 0.518337304 |    |
| siR_228025 | 1.8079  | 0.01   | -7.49817107  | 1.63E-15    | ** |
| siR_228026 | 2.446   | 0.01   | -7.93428061  | 9.77E-21    | ** |
| siR_228047 | 1.5598  | 0.01   | -7.28521726  | 1.75E-13    | ** |
| siR_228069 | 4.2894  | 0.01   | -8.74463204  | 7.97E-36    | ** |
| siR_228085 | 6.5582  | 0.01   | -9.35715612  | 2.15E-54    | ** |
| siR_22816  | 0.01    | 1.268  | 6.98641094   | 2.37E-11    | ** |
| siR_228164 | 1.0989  | 0.01   | -6.7799163   | 1.04E-09    | ** |
| siR_22821  | 5.8847  | 3.7667 | -0.64366774  | 0.000348898 |    |
| siR_228216 | 1.5243  | 0.01   | -7.25200305  | 3.42E-13    | ** |
| siR_228238 | 5.5656  | 0.01   | -9.12039339  | 2.86E-46    | ** |
| siR_228268 | 1.9143  | 0.01   | -7.58067313  | 2.20E-16    | ** |
| siR_228295 | 1.4534  | 0.01   | -7.18328801  | 1.30E-12    | ** |
| siR_228362 | 1.2053  | 0.01   | -6.91324847  | 1.40E-10    | ** |
| siR_228527 | 10.7413 | 0.01   | -10.06895291 | 1.24E-88    | ** |
| siR_228536 | 12.0884 | 0.01   | -10.23940765 | 1.17E-99    | ** |
| siR_228575 | 1.1698  | 0.01   | -6.87011809  | 2.73E-10    | ** |
| siR_228672 | 14.9244 | 0.01   | -10.54345719 | 7.15E-123   | ** |
| siR_228698 | 1.028   | 0.01   | -6.68369645  | 3.95E-09    | ** |
| siR_228708 | 1.1698  | 0.01   | -6.87011809  | 2.73E-10    | ** |
| siR_22883  | 1.6661  | 0.5967 | -1.48139731  | 0.000174482 | ** |
| siR_228891 | 4.3603  | 0.01   | -8.76828358  | 2.10E-36    | ** |
| siR_228998 | 1.7016  | 0.01   | -7.41074813  | 1.21E-14    | ** |
| siR_229006 | 2.9069  | 0.01   | -8.18333764  | 1.65E-24    | ** |
| siR_229078 | 5.1757  | 0.01   | -9.01561019  | 4.44E-43    | ** |
| siR_229086 | 14.7117 | 0.01   | -10.52274825 | 3.94E-121   | ** |
| siR_229174 | 11.9112 | 0.01   | -10.218103   | 3.29E-98    | ** |
| siR_229175 | 1.028   | 0.01   | -6.68369645  | 3.95E-09    | ** |
| siR_229203 | 19.9583 | 0.01   | -10.96277306 | 4.48E-164   | ** |
| siR_229219 | 3.0841  | 0.01   | -8.26870574  | 5.85E-26    | ** |

|            |           |          |               |              |    |
|------------|-----------|----------|---------------|--------------|----|
| siR_229234 | 1. 0989   | 0. 01    | -6. 7799163   | 1. 04E-09    | ** |
| siR_22942  | 33. 5357  | 20. 8473 | -0. 68583717  | 1. 43E-19    |    |
| siR_229431 | 1. 4534   | 0. 01    | -7. 18328801  | 1. 30E-12    | ** |
| siR_22945  | 4. 7148   | 4. 0277  | -0. 22724034  | 0. 22490769  |    |
| siR_229510 | 1. 2053   | 0. 01    | -6. 91324847  | 1. 40E-10    | ** |
| siR_229523 | 1. 5598   | 0. 01    | -7. 28521726  | 1. 75E-13    | ** |
| siR_22954  | 0. 01     | 5. 1838  | 9. 01786625   | 3. 94E-44    | ** |
| siR_22961  | 0. 01     | 1. 1188  | 6. 80580835   | 4. 20E-10    | ** |
| siR_229701 | 1. 5243   | 0. 01    | -7. 25200305  | 3. 42E-13    | ** |
| siR_229709 | 2. 446    | 0. 01    | -7. 93428061  | 9. 77E-21    | ** |
| siR_229729 | 208. 3748 | 0. 01    | -14. 34689464 | 0            | ** |
| siR_229756 | 1. 418    | 0. 01    | -7. 14771372  | 2. 54E-12    | ** |
| siR_22976  | 1. 6307   | 0. 5221  | -1. 64309333  | 6. 28E-05    | ** |
| siR_229806 | 1. 8079   | 0. 01    | -7. 49817107  | 1. 63E-15    | ** |
| siR_229942 | 2. 7296   | 0. 01    | -8. 09254576  | 4. 66E-23    | ** |
| siR_22996  | 2. 7296   | 1. 1934  | -1. 19361187  | 4. 34E-05    | ** |
| siR_229988 | 5. 6011   | 0. 01    | -9. 12956637  | 1. 46E-46    | ** |
| siR_230015 | 2. 1624   | 0. 01    | -7. 75648961  | 2. 05E-18    | ** |
| siR_23010  | 2. 9423   | 2. 6852  | -0. 13191481  | 0. 573014237 |    |
| siR_230197 | 1. 2053   | 0. 01    | -6. 91324847  | 1. 40E-10    | ** |
| siR_230198 | 2. 6233   | 0. 01    | -8. 035239    | 3. 46E-22    | ** |
| siR_23021  | 6. 1683   | 3. 1327  | -0. 97746632  | 1. 56E-07    |    |
| siR_230212 | 1. 028    | 0. 01    | -6. 68369645  | 3. 95E-09    | ** |
| siR_230245 | 1. 8788   | 0. 01    | -7. 55366769  | 4. 29E-16    | ** |
| siR_230251 | 1. 5243   | 0. 01    | -7. 25200305  | 3. 42E-13    | ** |
| siR_230265 | 1. 737    | 0. 01    | -7. 44045394  | 6. 21E-15    | ** |
| siR_230439 | 1. 4534   | 0. 01    | -7. 18328801  | 1. 30E-12    | ** |
| siR_230497 | 3. 7931   | 0. 01    | -8. 56723361  | 9. 20E-32    | ** |
| siR_230549 | 2. 4106   | 0. 01    | -7. 91324847  | 1. 91E-20    | ** |
| siR_230687 | 4. 5021   | 0. 01    | -8. 81445427  | 1. 45E-37    | ** |
| siR_230727 | 1. 9497   | 0. 01    | -7. 60710834  | 1. 13E-16    | ** |
| siR_230752 | 1. 2053   | 0. 01    | -6. 91324847  | 1. 40E-10    | ** |
| siR_230783 | 8. 508    | 0. 01    | -9. 73267618  | 2. 36E-70    | ** |
| siR_230816 | 1. 1698   | 0. 01    | -6. 87011809  | 2. 73E-10    | ** |
| siR_230928 | 2. 0206   | 0. 01    | -7. 65863995  | 2. 96E-17    | ** |
| siR_230947 | 9. 926    | 0. 01    | -9. 9550686   | 5. 84E-82    | ** |
| siR_230970 | 4. 254    | 0. 01    | -8. 73267624  | 1. 56E-35    | ** |
| siR_230975 | 2. 0561   | 0. 01    | -7. 68376661  | 1. 52E-17    | ** |
| siR_231045 | 1. 3825   | 0. 01    | -7. 11113566  | 4. 95E-12    | ** |
| siR_231047 | 1. 418    | 0. 01    | -7. 14771372  | 2. 54E-12    | ** |
| siR_231068 | 3. 9704   | 0. 01    | -8. 63314056  | 3. 26E-33    | ** |
| siR_231114 | 2. 1979   | 0. 01    | -7. 77998195  | 1. 05E-18    | ** |
| siR_231212 | 14. 7117  | 0. 01    | -10. 52274825 | 3. 94E-121   | ** |
| siR_231216 | 2. 8005   | 0. 01    | -8. 12954063  | 1. 23E-23    | ** |
| siR_231223 | 2. 5524   | 0. 01    | -7. 99571063  | 1. 32E-21    | ** |
| siR_231242 | 4. 3249   | 0. 01    | -8. 75652296  | 4. 09E-36    | ** |
| siR_231248 | 42. 2209  | 0. 01    | -12. 04374175 | 0            | ** |

|            |         |         |              |             |    |
|------------|---------|---------|--------------|-------------|----|
| siR_23131  | 41.6537 | 21.4813 | -0.95536335  | 5.60E-41    |    |
| siR_231316 | 2.6942  | 0.01    | -8.07371315  | 9.10E-23    | ** |
| siR_231346 | 1.418   | 0.01    | -7.14771372  | 2.54E-12    | ** |
| siR_231347 | 2.6233  | 0.01    | -8.035239    | 3.46E-22    | ** |
| siR_231414 | 1.3116  | 0.01    | -7.035184    | 1.88E-11    | ** |
| siR_23146  | 1.3116  | 0.4475  | -1.55136822  | 0.000594069 | ** |
| siR_231520 | 1.5952  | 0.01    | -7.31759351  | 8.99E-14    | ** |
| siR_231529 | 25.0986 | 0.01    | -11.29339117 | 3.79E-206   | ** |
| siR_231541 | 7.7281  | 0.01    | -9.59396997  | 5.71E-64    | ** |
| siR_231568 | 23.7869 | 0.01    | -11.21595143 | 2.06E-195   | ** |
| siR_231625 | 3.0841  | 0.01    | -8.26870574  | 5.85E-26    | ** |
| siR_23164  | 1.2053  | 0.9323  | -0.37052611  | 0.334212439 |    |
| siR_231642 | 2.0915  | 0.01    | -7.70839418  | 7.79E-18    | ** |
| siR_231649 | 5.3529  | 0.01    | -9.06417692  | 1.57E-44    | ** |
| siR_231664 | 43.9934 | 0.01    | -12.10307154 | 0           | ** |
| siR_23169  | 3.0132  | 0.8578  | -1.81258321  | 4.66E-09    | ** |
| siR_231732 | 2.2333  | 0.01    | -7.80303324  | 5.38E-19    | ** |
| siR_231770 | 1.2762  | 0.01    | -6.99571063  | 3.67E-11    | ** |
| siR_231774 | 1.2762  | 0.01    | -6.99571063  | 3.67E-11    | ** |
| siR_231783 | 1.028   | 0.01    | -6.68369645  | 3.95E-09    | ** |
| siR_231817 | 1.7016  | 0.01    | -7.41074813  | 1.21E-14    | ** |
| siR_231823 | 2.2688  | 0.01    | -7.82578561  | 2.76E-19    | ** |
| siR_231830 | 1.418   | 0.01    | -7.14771372  | 2.54E-12    | ** |
| siR_231856 | 1.5243  | 0.01    | -7.25200305  | 3.42E-13    | ** |
| siR_231909 | 1.6307  | 0.01    | -7.34934759  | 4.61E-14    | ** |
| siR_231926 | 32.2595 | 0.01    | -11.65550839 | 9.26E-265   | ** |
| siR_23194  | 0.01    | 8.8759  | 9.7937496    | 4.90E-75    | ** |
| siR_231967 | 1.418   | 0.01    | -7.14771372  | 2.54E-12    | ** |
| siR_231974 | 4.7857  | 0.01    | -8.90258614  | 6.91E-40    | ** |
| siR_232081 | 2.0915  | 0.01    | -7.70839418  | 7.79E-18    | ** |
| siR_232088 | 1.5243  | 0.01    | -7.25200305  | 3.42E-13    | ** |
| siR_232107 | 2.9069  | 0.01    | -8.18333764  | 1.65E-24    | ** |
| siR_232135 | 8.6498  | 0.01    | -9.75652296  | 1.63E-71    | ** |
| siR_23220  | 0.01    | 4.1023  | 8.68028919   | 4.46E-35    | ** |
| siR_23230  | 0.01    | 3.8786  | 8.59939219   | 3.33E-33    | ** |
| siR_232334 | 5.0693  | 0.01    | -8.98564277  | 3.30E-42    | ** |
| siR_232528 | 1.1344  | 0.01    | -6.82578563  | 5.32E-10    | ** |
| siR_232554 | 1.3116  | 0.01    | -7.035184    | 1.88E-11    | ** |
| siR_23291  | 0.01    | 1.9766  | 7.62687714   | 2.78E-17    | ** |
| siR_23295  | 0.01    | 1.4918  | 7.22091032   | 3.17E-13    | ** |
| siR_232962 | 2.3042  | 0.01    | -7.84812212  | 1.41E-19    | ** |
| siR_233004 | 1.3471  | 0.01    | -7.07371314  | 9.66E-12    | ** |
| siR_233039 | 3.3323  | 0.01    | -8.38037447  | 5.44E-28    | ** |
| siR_233093 | 2.127   | 0.01    | -7.73267621  | 3.99E-18    | ** |
| siR_23314  | 2.7296  | 1.0069  | -1.43876914  | 2.35E-06    | ** |
| siR_233280 | 11.5921 | 0.01    | -10.17892617 | 1.35E-95    | ** |
| siR_233281 | 2.6587  | 0.01    | -8.05457718  | 1.77E-22    | ** |

|            |          |         |               |              |    |
|------------|----------|---------|---------------|--------------|----|
| siR_233282 | 1. 5243  | 0. 01   | -7. 25200305  | 3. 42E-13    | ** |
| siR_233283 | 1. 2053  | 0. 01   | -6. 91324847  | 1. 40E-10    | ** |
| siR_233284 | 1. 1344  | 0. 01   | -6. 82578563  | 5. 32E-10    | ** |
| siR_233325 | 2. 6587  | 0. 01   | -8. 05457718  | 1. 77E-22    | ** |
| siR_233537 | 1. 2053  | 0. 01   | -6. 91324847  | 1. 40E-10    | ** |
| siR_233541 | 1. 8079  | 0. 01   | -7. 49817107  | 1. 63E-15    | ** |
| siR_23361  | 1. 2053  | 0. 4848 | -1. 31393068  | 0. 003684871 | ** |
| siR_233735 | 14. 4636 | 0. 01   | -10. 49821097 | 4. 23E-119   | ** |
| siR_233736 | 2. 8005  | 0. 01   | -8. 12954063  | 1. 23E-23    | ** |
| siR_233737 | 1. 5952  | 0. 01   | -7. 31759351  | 8. 99E-14    | ** |
| siR_233738 | 1. 418   | 0. 01   | -7. 14771372  | 2. 54E-12    | ** |
| siR_233739 | 1. 3116  | 0. 01   | -7. 035184    | 1. 88E-11    | ** |
| siR_233765 | 1. 418   | 0. 01   | -7. 14771372  | 2. 54E-12    | ** |
| siR_233894 | 1. 2762  | 0. 01   | -6. 99571063  | 3. 67E-11    | ** |
| siR_233962 | 1. 4889  | 0. 01   | -7. 21810305  | 6. 67E-13    | ** |
| siR_233984 | 1. 3825  | 0. 01   | -7. 11113566  | 4. 95E-12    | ** |
| siR_233997 | 1. 8788  | 0. 01   | -7. 55366769  | 4. 29E-16    | ** |
| siR_234083 | 1. 4534  | 0. 01   | -7. 18328801  | 1. 30E-12    | ** |
| siR_23418  | 1. 0635  | 0. 7086 | -0. 58577666  | 0. 167596979 |    |
| siR_23422  | 1. 2053  | 0. 3356 | -1. 84457766  | 0. 000205328 | ** |
| siR_234328 | 1. 2762  | 0. 01   | -6. 99571063  | 3. 67E-11    | ** |
| siR_234375 | 1. 2053  | 0. 01   | -6. 91324847  | 1. 40E-10    | ** |
| siR_234390 | 2. 1624  | 0. 01   | -7. 75648961  | 2. 05E-18    | ** |
| siR_234391 | 1. 7725  | 0. 01   | -7. 46964183  | 3. 18E-15    | ** |
| siR_234399 | 3. 864   | 0. 01   | -8. 59395129  | 2. 42E-32    | ** |
| siR_23440  | 14. 9953 | 4. 7363 | -1. 66267802  | 3. 83E-35    | ** |
| siR_234408 | 12. 1239 | 0. 01   | -10. 24363814 | 5. 98E-100   | ** |
| siR_234421 | 1. 028   | 0. 01   | -6. 68369645  | 3. 95E-09    | ** |
| siR_234432 | 2. 1624  | 0. 01   | -7. 75648961  | 2. 05E-18    | ** |
| siR_234448 | 2. 5524  | 0. 01   | -7. 99571063  | 1. 32E-21    | ** |
| siR_234452 | 18. 6112 | 0. 01   | -10. 86195527 | 4. 76E-153   | ** |
| siR_234465 | 21. 9435 | 0. 01   | -11. 09957799 | 2. 53E-180   | ** |
| siR_234483 | 3. 1905  | 0. 01   | -8. 31763871  | 7. 88E-27    | ** |
| siR_234493 | 1. 5952  | 0. 01   | -7. 31759351  | 8. 99E-14    | ** |
| siR_2345   | 1. 4889  | 0. 6713 | -1. 14921731  | 0. 003563263 | ** |
| siR_234513 | 2. 3751  | 0. 01   | -7. 89184446  | 3. 72E-20    | ** |
| siR_234530 | 3. 0487  | 0. 01   | -8. 25205038  | 1. 14E-25    | ** |
| siR_234573 | 5. 2111  | 0. 01   | -9. 02544416  | 2. 28E-43    | ** |
| siR_234581 | 5. 4238  | 0. 01   | -9. 08316017  | 4. 14E-45    | ** |
| siR_234594 | 11. 2376 | 0. 01   | -10. 13411828 | 1. 07E-92    | ** |
| siR_234604 | 1. 3825  | 0. 01   | -7. 11113566  | 4. 95E-12    | ** |
| siR_23461  | 1. 0989  | 0. 2238 | -2. 29577817  | 4. 70E-05    | ** |
| siR_234682 | 6. 1683  | 0. 01   | -9. 26872915  | 3. 34E-51    | ** |
| siR_234714 | 3. 8286  | 0. 01   | -8. 58067313  | 4. 72E-32    | ** |
| siR_234716 | 3. 2968  | 0. 01   | -8. 36492254  | 1. 06E-27    | ** |
| siR_234746 | 1. 8079  | 0. 01   | -7. 49817107  | 1. 63E-15    | ** |
| siR_234788 | 1. 2407  | 0. 01   | -6. 95501051  | 7. 17E-11    | ** |

|            |          |           |               |              |    |
|------------|----------|-----------|---------------|--------------|----|
| siR_234863 | 4. 5021  | 0. 01     | -8. 81445427  | 1. 45E-37    | ** |
| siR_234864 | 1. 4534  | 0. 01     | -7. 18328801  | 1. 30E-12    | ** |
| siR_234901 | 2. 446   | 0. 01     | -7. 93428061  | 9. 77E-21    | ** |
| siR_234946 | 1. 5952  | 0. 01     | -7. 31759351  | 8. 99E-14    | ** |
| siR_23497  | 0. 01    | 4. 1769   | 8. 70628879   | 1. 06E-35    | ** |
| siR_234975 | 2. 3042  | 0. 01     | -7. 84812212  | 1. 41E-19    | ** |
| siR_234985 | 1. 8079  | 0. 01     | -7. 49817107  | 1. 63E-15    | ** |
| siR_235020 | 4. 0058  | 0. 01     | -8. 64594661  | 1. 67E-33    | ** |
| siR_235238 | 3. 1905  | 0. 01     | -8. 31763871  | 7. 88E-27    | ** |
| siR_23531  | 0. 01    | 1. 6409   | 7. 35834351   | 1. 79E-14    | ** |
| siR_23534  | 0. 01    | 1. 3053   | 7. 02823761   | 1. 15E-11    | ** |
| siR_23540  | 0. 01    | 3. 6548   | 8. 51364865   | 2. 48E-31    | ** |
| siR_235401 | 1. 1698  | 0. 01     | -6. 87011809  | 2. 73E-10    | ** |
| siR_235424 | 2. 0206  | 0. 01     | -7. 65863995  | 2. 96E-17    | ** |
| siR_235426 | 5. 672   | 0. 01     | -9. 14771376  | 3. 85E-47    | ** |
| siR_235460 | 1. 4534  | 0. 01     | -7. 18328801  | 1. 30E-12    | ** |
| siR_235484 | 6. 4873  | 0. 01     | -9. 34147438  | 8. 16E-54    | ** |
| siR_23549  | 62. 2147 | 14. 0225  | -2. 14951192  | 1. 54E-197   | ** |
| siR_235512 | 1. 1698  | 0. 01     | -6. 87011809  | 2. 73E-10    | ** |
| siR_23552  | 13. 0101 | 2. 3122   | -2. 49229395  | 1. 05E-50    | ** |
| siR_235549 | 26. 552  | 0. 01     | -11. 37460468 | 4. 81E-218   | ** |
| siR_235550 | 2. 2688  | 0. 01     | -7. 82578561  | 2. 76E-19    | ** |
| siR_23558  | 1. 2762  | 0. 6713   | -0. 92682489  | 0. 023898405 |    |
| siR_235603 | 1. 2407  | 0. 01     | -6. 95501051  | 7. 17E-11    | ** |
| siR_235608 | 1. 028   | 0. 01     | -6. 68369645  | 3. 95E-09    | ** |
| siR_235627 | 1. 8434  | 0. 01     | -7. 52622535  | 8. 37E-16    | ** |
| siR_235628 | 1. 3825  | 0. 01     | -7. 11113566  | 4. 95E-12    | ** |
| siR_23567  | 0. 01    | 4. 2888   | 8. 74443023   | 1. 22E-36    | ** |
| siR_235674 | 1. 5243  | 0. 01     | -7. 25200305  | 3. 42E-13    | ** |
| siR_235675 | 5. 5302  | 0. 01     | -9. 11118782  | 5. 57E-46    | ** |
| siR_235695 | 2. 3042  | 0. 01     | -7. 84812212  | 1. 41E-19    | ** |
| siR_235696 | 1. 2407  | 0. 01     | -6. 95501051  | 7. 17E-11    | ** |
| siR_235701 | 1. 5243  | 0. 01     | -7. 25200305  | 3. 42E-13    | ** |
| siR_235702 | 1. 2407  | 0. 01     | -6. 95501051  | 7. 17E-11    | ** |
| siR_235713 | 1. 2053  | 0. 01     | -6. 91324847  | 1. 40E-10    | ** |
| siR_235803 | 6. 0974  | 0. 01     | -9. 25205038  | 1. 27E-50    | ** |
| siR_235822 | 3. 6159  | 0. 01     | -8. 49821097  | 2. 60E-30    | ** |
| siR_235843 | 1. 4889  | 0. 01     | -7. 21810305  | 6. 67E-13    | ** |
| siR_23585  | 52. 4305 | 13. 5377  | -1. 95342365  | 1. 49E-147   | ** |
| siR_23586  | 1. 5952  | 0. 5594   | -1. 51178516  | 0. 000194442 | ** |
| siR_235895 | 1. 4889  | 0. 01     | -7. 21810305  | 6. 67E-13    | ** |
| siR_236027 | 1. 1344  | 0. 01     | -6. 82578563  | 5. 32E-10    | ** |
| siR_23605  | 0. 01    | 21. 6304  | 11. 07884463  | 8. 40E-182   | ** |
| siR_23608  | 0. 01    | 126. 1651 | 13. 62302526  | 0            | ** |
| siR_23609  | 0. 01    | 2. 2749   | 7. 82965932   | 8. 83E-20    | ** |
| siR_23613  | 0. 01    | 20. 8473  | 11. 02564483  | 3. 02E-175   | ** |
| siR_236130 | 3. 5095  | 0. 01     | -8. 45512172  | 1. 93E-29    | ** |

|            |          |         |              |             |    |
|------------|----------|---------|--------------|-------------|----|
| siR_23619  | 0.01     | 3.9531  | 8.62684064   | 7.90E-34    | ** |
| siR_236204 | 2.3751   | 0.01    | -7.89184446  | 3.72E-20    | ** |
| siR_236208 | 1.8434   | 0.01    | -7.52622535  | 8.37E-16    | ** |
| siR_236231 | 1.9143   | 0.01    | -7.58067313  | 2.20E-16    | ** |
| siR_236237 | 2.4106   | 0.01    | -7.91324847  | 1.91E-20    | ** |
| siR_236253 | 1.8788   | 0.01    | -7.55366769  | 4.29E-16    | ** |
| siR_236257 | 2.8714   | 0.01    | -8.16561052  | 3.22E-24    | ** |
| siR_236271 | 1.3825   | 0.01    | -7.11113566  | 4.95E-12    | ** |
| siR_236277 | 1.6307   | 0.01    | -7.34934759  | 4.61E-14    | ** |
| siR_236279 | 4.254    | 0.01    | -8.73267624  | 1.56E-35    | ** |
| siR_23628  | 0.01     | 12.9783 | 10.3418857   | 2.24E-109   | ** |
| siR_236287 | 1.4534   | 0.01    | -7.18328801  | 1.30E-12    | ** |
| siR_23629  | 0.01     | 1.2307  | 6.94333532   | 4.86E-11    | ** |
| siR_236291 | 2.1979   | 0.01    | -7.77998195  | 1.05E-18    | ** |
| siR_236308 | 2.9423   | 0.01    | -8.20080054  | 8.47E-25    | ** |
| siR_236314 | 25.3822  | 0.01    | -11.30960134 | 1.81E-208   | ** |
| siR_236321 | 1.0989   | 0.01    | -6.7799163   | 1.04E-09    | ** |
| siR_236326 | 7.1609   | 0.01    | -9.48399712  | 2.51E-59    | ** |
| siR_236385 | 1.5952   | 0.01    | -7.31759351  | 8.99E-14    | ** |
| siR_2364   | 2.3397   | 1.5663  | -0.57896299  | 0.041117203 |    |
| siR_236405 | 2.127    | 0.01    | -7.73267621  | 3.99E-18    | ** |
| siR_23650  | 1.3116   | 0.2611  | -2.32865344  | 6.82E-06    | ** |
| siR_23652  | 2.2333   | 0.5221  | -2.096779    | 3.01E-08    | ** |
| siR_236520 | 1.0989   | 0.01    | -6.7799163   | 1.04E-09    | ** |
| siR_236526 | 11.7694  | 0.01    | -10.20082503 | 4.77E-97    | ** |
| siR_236528 | 1.3825   | 0.01    | -7.11113566  | 4.95E-12    | ** |
| siR_236529 | 1.0989   | 0.01    | -6.7799163   | 1.04E-09    | ** |
| siR_23653  | 1.0989   | 0.2238  | -2.29577817  | 4.70E-05    | ** |
| siR_236535 | 2.4815   | 0.01    | -7.95506863  | 5.01E-21    | ** |
| siR_236544 | 14.1091  | 0.01    | -10.46241031 | 3.37E-116   | ** |
| siR_236568 | 8.0117   | 0.01    | -9.64596464  | 2.72E-66    | ** |
| siR_236575 | 7.7635   | 0.01    | -9.60056343  | 2.92E-64    | ** |
| siR_236587 | 4.8212   | 0.01    | -8.91324847  | 3.54E-40    | ** |
| siR_236592 | 196.2864 | 0.01    | -14.2606716  | 0           | ** |
| siR_236593 | 3.0841   | 0.01    | -8.26870574  | 5.85E-26    | ** |
| siR_236594 | 1.0635   | 0.01    | -6.73267622  | 2.02E-09    | ** |
| siR_236599 | 27.5801  | 0.01    | -11.42941184 | 1.85E-226   | ** |
| siR_23663  | 2.5524   | 1.3426  | -0.92682489  | 0.001302441 |    |
| siR_236716 | 1.5952   | 0.01    | -7.31759351  | 8.99E-14    | ** |
| siR_236737 | 2.4106   | 0.01    | -7.91324847  | 1.91E-20    | ** |
| siR_236839 | 1.1698   | 0.01    | -6.87011809  | 2.73E-10    | ** |
| siR_236871 | 7.6926   | 0.01    | -9.58732748  | 1.11E-63    | ** |
| siR_236874 | 11.1667  | 0.01    | -10.12498721 | 4.08E-92    | ** |
| siR_236886 | 5.0693   | 0.01    | -8.98564277  | 3.30E-42    | ** |
| siR_236919 | 1.3116   | 0.01    | -7.035184    | 1.88E-11    | ** |
| siR_236954 | 4.1476   | 0.01    | -8.69613295  | 1.15E-34    | ** |
| siR_236989 | 5.672    | 0.01    | -9.14771376  | 3.85E-47    | ** |

|            |         |        |              |             |    |
|------------|---------|--------|--------------|-------------|----|
| siR_237000 | 1.0635  | 0.01   | -6.73267622  | 2.02E-09    | ** |
| siR_237013 | 1.737   | 0.01   | -7.44045394  | 6.21E-15    | ** |
| siR_237039 | 20.3837 | 0.01   | -10.99320014 | 1.48E-167   | ** |
| siR_23704  | 1.737   | 0.6713 | -1.37156821  | 0.000295651 | ** |
| siR_237051 | 2.5524  | 0.01   | -7.99571063  | 1.32E-21    | ** |
| siR_237070 | 1.4889  | 0.01   | -7.21810305  | 6.67E-13    | ** |
| siR_237074 | 7.1254  | 0.01   | -9.47682718  | 4.89E-59    | ** |
| siR_237088 | 1.7016  | 0.01   | -7.41074813  | 1.21E-14    | ** |
| siR_237101 | 2.127   | 0.01   | -7.73267621  | 3.99E-18    | ** |
| siR_237137 | 4.2894  | 0.01   | -8.74463204  | 7.97E-36    | ** |
| siR_237150 | 4.4667  | 0.01   | -8.80306553  | 2.82E-37    | ** |
| siR_237174 | 1.028   | 0.01   | -6.68369645  | 3.95E-09    | ** |
| siR_237189 | 2.1624  | 0.01   | -7.75648961  | 2.05E-18    | ** |
| siR_23720  | 1.3825  | 3.2819 | 1.2472518    | 3.04E-06    | ** |
| siR_237212 | 1.7016  | 0.01   | -7.41074813  | 1.21E-14    | ** |
| siR_23722  | 6.2746  | 7.7944 | 0.31291448   | 0.033495957 |    |
| siR_237228 | 1.737   | 0.01   | -7.44045394  | 6.21E-15    | ** |
| siR_23723  | 1.4889  | 1.4545 | -0.03372356  | 0.919742455 |    |
| siR_23725  | 4.3249  | 1.3799 | -1.64810306  | 4.70E-11    | ** |
| siR_237274 | 5.1402  | 0.01   | -9.00568068  | 8.67E-43    | ** |
| siR_237308 | 3.864   | 0.01   | -8.59395129  | 2.42E-32    | ** |
| siR_237339 | 2.5878  | 0.01   | -8.0155823   | 6.75E-22    | ** |
| siR_237357 | 1.3825  | 0.01   | -7.11113566  | 4.95E-12    | ** |
| siR_237377 | 1.1344  | 0.01   | -6.82578563  | 5.32E-10    | ** |
| siR_237385 | 3.7931  | 0.01   | -8.56723361  | 9.20E-32    | ** |
| siR_237398 | 1.5952  | 0.01   | -7.31759351  | 8.99E-14    | ** |
| siR_237415 | 1.2053  | 0.01   | -6.91324847  | 1.40E-10    | ** |
| siR_237459 | 7.1609  | 0.01   | -9.48399712  | 2.51E-59    | ** |
| siR_237462 | 3.9704  | 0.01   | -8.63314056  | 3.26E-33    | ** |
| siR_237501 | 1.028   | 0.01   | -6.68369645  | 3.95E-09    | ** |
| siR_237512 | 1.3116  | 0.01   | -7.035184    | 1.88E-11    | ** |
| siR_237535 | 3.8286  | 0.01   | -8.58067313  | 4.72E-32    | ** |
| siR_237538 | 12.1593 | 0.01   | -10.2478444  | 3.07E-100   | ** |
| siR_237544 | 5.4593  | 0.01   | -9.09257214  | 2.12E-45    | ** |
| siR_237548 | 1.3471  | 0.01   | -7.07371314  | 9.66E-12    | ** |
| siR_237554 | 1.8079  | 0.01   | -7.49817107  | 1.63E-15    | ** |
| siR_237594 | 9.0397  | 0.01   | -9.82013109  | 1.05E-74    | ** |
| siR_237641 | 4.3603  | 0.01   | -8.76828358  | 2.10E-36    | ** |
| siR_237655 | 1.3825  | 0.01   | -7.11113566  | 4.95E-12    | ** |
| siR_23768  | 1.9497  | 0.3729 | -2.38639145  | 2.19E-08    | ** |
| siR_23769  | 1.2407  | 0.3356 | -1.88633969  | 0.000130463 | ** |
| siR_23770  | 5.4593  | 0.8578 | -2.67000276  | 8.33E-24    | ** |
| siR_23771  | 2.6942  | 0.4475 | -2.58989736  | 4.61E-12    | ** |
| siR_237783 | 8.827   | 0.01   | -9.78577943  | 5.77E-73    | ** |
| siR_237785 | 3.0132  | 0.01   | -8.23515263  | 2.23E-25    | ** |
| siR_237803 | 2.3751  | 0.01   | -7.89184446  | 3.72E-20    | ** |
| siR_237805 | 1.3116  | 0.01   | -7.035184    | 1.88E-11    | ** |



|            |         |         |              |             |    |
|------------|---------|---------|--------------|-------------|----|
| siR_23786  | 2.2333  | 1.268   | -0.81662232  | 0.00694745  |    |
| siR_237868 | 1.5952  | 0.01    | -7.31759351  | 8.99E-14    | ** |
| siR_237873 | 1.418   | 0.01    | -7.14771372  | 2.54E-12    | ** |
| siR_23788  | 0.01    | 12.7918 | 10.32100357  | 8.15E-108   | ** |
| siR_237896 | 2.2333  | 0.01    | -7.80303324  | 5.38E-19    | ** |
| siR_237901 | 1.028   | 0.01    | -6.68369645  | 3.95E-09    | ** |
| siR_23792  | 13.6128 | 10.9271 | -0.31705328  | 0.004504384 |    |
| siR_237970 | 5.0693  | 0.01    | -8.98564277  | 3.30E-42    | ** |
| siR_237996 | 7.1609  | 0.01    | -9.48399712  | 2.51E-59    | ** |
| siR_238001 | 2.0206  | 0.01    | -7.65863995  | 2.96E-17    | ** |
| siR_238023 | 3.3677  | 0.01    | -8.39561983  | 2.79E-28    | ** |
| siR_238029 | 4.0058  | 0.01    | -8.64594661  | 1.67E-33    | ** |
| siR_238031 | 1.0989  | 0.01    | -6.7799163   | 1.04E-09    | ** |
| siR_23807  | 19.3202 | 15.104  | -0.35517936  | 0.000165011 |    |
| siR_238074 | 1.1698  | 0.01    | -6.87011809  | 2.73E-10    | ** |
| siR_238108 | 9.1106  | 0.01    | -9.83140232  | 2.75E-75    | ** |
| siR_23812  | 0.01    | 23.5697 | 11.20271768  | 4.91E-198   | ** |
| siR_23816  | 0.01    | 2.7597  | 8.10836763   | 7.72E-24    | ** |
| siR_238189 | 5.282   | 0.01    | -9.04494046  | 5.99E-44    | ** |
| siR_238192 | 2.127   | 0.01    | -7.73267621  | 3.99E-18    | ** |
| siR_238212 | 7.4445  | 0.01    | -9.5400311   | 1.20E-61    | ** |
| siR_238220 | 28.3245 | 0.01    | -11.46783496 | 1.49E-232   | ** |
| siR_238245 | 3.9704  | 0.01    | -8.63314056  | 3.26E-33    | ** |
| siR_238254 | 2.5524  | 0.01    | -7.99571063  | 1.32E-21    | ** |
| siR_238321 | 1.5952  | 0.01    | -7.31759351  | 8.99E-14    | ** |
| siR_23835  | 0.01    | 3.3937  | 8.40671523   | 3.81E-29    | ** |
| siR_238434 | 15.1726 | 0.01    | -10.56725266 | 6.65E-125   | ** |
| siR_23866  | 2.7651  | 1.0069  | -1.45741125  | 1.60E-06    | ** |
| siR_23868  | 4.5376  | 4.5499  | 0.0039054    | 0.981326925 |    |
| siR_238729 | 2.0915  | 0.01    | -7.70839418  | 7.79E-18    | ** |
| siR_23875  | 1.418   | 0.4475  | -1.66389794  | 0.000170776 | ** |
| siR_238998 | 2.8714  | 0.01    | -8.16561052  | 3.22E-24    | ** |
| siR_239014 | 1.2762  | 0.01    | -6.99571063  | 3.67E-11    | ** |
| siR_239022 | 11.7694 | 0.01    | -10.20082503 | 4.77E-97    | ** |
| siR_239026 | 11.8048 | 0.01    | -10.20515795 | 2.44E-97    | ** |
| siR_239032 | 2.1979  | 0.01    | -7.77998195  | 1.05E-18    | ** |
| siR_239034 | 2.9069  | 0.01    | -8.18333764  | 1.65E-24    | ** |
| siR_239064 | 1.7725  | 0.01    | -7.46964183  | 3.18E-15    | ** |
| siR_239118 | 1.0989  | 0.01    | -6.7799163   | 1.04E-09    | ** |
| siR_239140 | 1.8079  | 0.01    | -7.49817107  | 1.63E-15    | ** |
| siR_239185 | 2.7651  | 0.01    | -8.11118786  | 2.39E-23    | ** |
| siR_239205 | 1.9852  | 0.01    | -7.63314056  | 5.78E-17    | ** |
| siR_239227 | 1.028   | 0.01    | -6.68369645  | 3.95E-09    | ** |
| siR_239276 | 5.3529  | 0.01    | -9.06417692  | 1.57E-44    | ** |
| siR_239360 | 1.7016  | 0.01    | -7.41074813  | 1.21E-14    | ** |
| siR_239406 | 1.3825  | 0.01    | -7.11113566  | 4.95E-12    | ** |
| siR_239408 | 1.0635  | 0.01    | -6.73267622  | 2.02E-09    | ** |

|            |           |          |              |              |    |
|------------|-----------|----------|--------------|--------------|----|
| siR_239424 | 1. 1344   | 0. 01    | -6. 82578563 | 5. 32E-10    | ** |
| siR_239435 | 2. 9778   | 0. 01    | -8. 21810305 | 4. 34E-25    | ** |
| siR_239488 | 1. 2407   | 0. 01    | -6. 95501051 | 7. 17E-11    | ** |
| siR_239501 | 2. 0561   | 0. 01    | -7. 68376661 | 1. 52E-17    | ** |
| siR_239536 | 6. 4873   | 0. 01    | -9. 34147438 | 8. 16E-54    | ** |
| siR_239539 | 7. 3381   | 0. 01    | -9. 51926273 | 8. 87E-61    | ** |
| siR_239543 | 2. 6587   | 0. 01    | -8. 05457718 | 1. 77E-22    | ** |
| siR_239574 | 13. 1165  | 0. 01    | -10. 3571671 | 4. 49E-108   | ** |
| siR_239579 | 2. 3751   | 0. 01    | -7. 89184446 | 3. 72E-20    | ** |
| siR_239612 | 1. 5598   | 0. 01    | -7. 28521726 | 1. 75E-13    | ** |
| siR_239614 | 4. 6439   | 0. 01    | -8. 85919308 | 1. 00E-38    | ** |
| siR_239637 | 6. 3101   | 0. 01    | -9. 30151909 | 2. 30E-52    | ** |
| siR_239700 | 3. 0841   | 0. 01    | -8. 26870574 | 5. 85E-26    | ** |
| siR_239704 | 1. 8434   | 0. 01    | -7. 52622535 | 8. 37E-16    | ** |
| siR_239731 | 7. 5508   | 0. 01    | -9. 56048567 | 1. 61E-62    | ** |
| siR_239777 | 3. 8995   | 0. 01    | -8. 60714536 | 1. 24E-32    | ** |
| siR_239783 | 2. 5169   | 0. 01    | -7. 97550407 | 2. 57E-21    | ** |
| siR_239794 | 2. 0206   | 0. 01    | -7. 65863995 | 2. 96E-17    | ** |
| siR_239834 | 3. 8286   | 0. 01    | -8. 58067313 | 4. 72E-32    | ** |
| siR_239843 | 4. 1476   | 0. 01    | -8. 69613295 | 1. 15E-34    | ** |
| siR_23985  | 9. 6424   | 2. 8343  | -1. 76639981 | 4. 53E-25    | ** |
| siR_239871 | 2. 1624   | 0. 01    | -7. 75648961 | 2. 05E-18    | ** |
| siR_239879 | 3. 4032   | 0. 01    | -8. 41074813 | 1. 43E-28    | ** |
| siR_239902 | 1. 2762   | 0. 01    | -6. 99571063 | 3. 67E-11    | ** |
| siR_239918 | 1. 418    | 0. 01    | -7. 14771372 | 2. 54E-12    | ** |
| siR_23999  | 166. 3666 | 35. 7648 | -2. 21775355 | 0            | ** |
| siR_239996 | 1. 6661   | 0. 01    | -7. 38033118 | 2. 36E-14    | ** |
| siR_24000  | 1. 7725   | 0. 1865  | -3. 24853809 | 3. 71E-10    | ** |
| siR_240026 | 1. 7725   | 0. 01    | -7. 46964183 | 3. 18E-15    | ** |
| siR_240041 | 5. 6365   | 0. 01    | -9. 13865581 | 7. 51E-47    | ** |
| siR_240049 | 2. 9423   | 0. 01    | -8. 20080054 | 8. 47E-25    | ** |
| siR_24006  | 1. 2407   | 0. 3729  | -1. 73429361 | 0. 000303178 | ** |
| siR_24009  | 1. 2407   | 0. 3729  | -1. 73429361 | 0. 000303178 | ** |
| siR_240190 | 1. 9497   | 0. 01    | -7. 60710834 | 1. 13E-16    | ** |
| siR_240226 | 1. 0989   | 0. 01    | -6. 7799163  | 1. 04E-09    | ** |
| siR_24023  | 0. 01     | 17. 7519 | 10. 79375773 | 2. 46E-149   | ** |
| siR_240246 | 2. 9423   | 0. 01    | -8. 20080054 | 8. 47E-25    | ** |
| siR_24027  | 0. 01     | 6. 8248  | 9. 41464296  | 7. 24E-58    | ** |
| siR_24028  | 0. 01     | 1. 4918  | 7. 22091032  | 3. 17E-13    | ** |
| siR_240303 | 1. 7725   | 0. 01    | -7. 46964183 | 3. 18E-15    | ** |
| siR_240316 | 1. 4534   | 0. 01    | -7. 18328801 | 1. 30E-12    | ** |
| siR_24032  | 0. 01     | 3. 0954  | 8. 27398204  | 1. 20E-26    | ** |
| siR_240333 | 1. 4534   | 0. 01    | -7. 18328801 | 1. 30E-12    | ** |
| siR_240334 | 1. 8079   | 0. 01    | -7. 49817107 | 1. 63E-15    | ** |
| siR_240359 | 2. 1979   | 0. 01    | -7. 77998195 | 1. 05E-18    | ** |
| siR_240361 | 1. 3825   | 0. 01    | -7. 11113566 | 4. 95E-12    | ** |
| siR_240366 | 1. 2407   | 0. 01    | -6. 95501051 | 7. 17E-11    | ** |

|            |          |         |               |              |    |
|------------|----------|---------|---------------|--------------|----|
| siR_240382 | 1. 6307  | 0. 01   | -7. 34934759  | 4. 61E-14    | ** |
| siR_240387 | 1. 1344  | 0. 01   | -6. 82578563  | 5. 32E-10    | ** |
| siR_240428 | 9. 0397  | 0. 01   | -9. 82013109  | 1. 05E-74    | ** |
| siR_240464 | 4. 254   | 0. 01   | -8. 73267624  | 1. 56E-35    | ** |
| siR_240505 | 1. 7725  | 0. 01   | -7. 46964183  | 3. 18E-15    | ** |
| siR_240518 | 1. 9497  | 0. 01   | -7. 60710834  | 1. 13E-16    | ** |
| siR_24052  | 2. 6233  | 1. 268  | -1. 04882806  | 0. 000304483 | ** |
| siR_240530 | 1. 2053  | 0. 01   | -6. 91324847  | 1. 40E-10    | ** |
| siR_24056  | 4. 5376  | 1. 3426 | -1. 75689989  | 1. 76E-12    | ** |
| siR_240585 | 4. 7503  | 0. 01   | -8. 89187482  | 1. 35E-39    | ** |
| siR_240604 | 3. 1196  | 0. 01   | -8. 28521723  | 3. 00E-26    | ** |
| siR_240650 | 2. 127   | 0. 01   | -7. 73267621  | 3. 99E-18    | ** |
| siR_240688 | 2. 8005  | 0. 01   | -8. 12954063  | 1. 23E-23    | ** |
| siR_24074  | 2. 127   | 0. 7832 | -1. 44136736  | 3. 11E-05    | ** |
| siR_240889 | 17. 7959 | 0. 01   | -10. 79732914 | 2. 24E-146   | ** |
| siR_240925 | 6. 1683  | 0. 01   | -9. 26872915  | 3. 34E-51    | ** |
| siR_240926 | 5. 2466  | 0. 01   | -9. 03523897  | 1. 17E-43    | ** |
| siR_24094  | 2. 0915  | 0. 9323 | -1. 16567183  | 0. 000456163 | ** |
| siR_240972 | 1. 1698  | 0. 01   | -6. 87011809  | 2. 73E-10    | ** |
| siR_240975 | 3. 3677  | 0. 01   | -8. 39561983  | 2. 79E-28    | ** |
| siR_240982 | 6. 9482  | 0. 01   | -9. 44049544  | 1. 38E-57    | ** |
| siR_24100  | 1. 8788  | 0. 7459 | -1. 33275737  | 0. 000228382 | ** |
| siR_24101  | 3. 3323  | 1. 6782 | -0. 98960363  | 0. 000101982 | ** |
| siR_241022 | 92. 3471 | 0. 01   | -13. 17285099 | 0            | ** |
| siR_24103  | 1. 5598  | 1. 2307 | -0. 34188193  | 0. 306763052 | ** |
| siR_241089 | 1. 5598  | 0. 01   | -7. 28521726  | 1. 75E-13    | ** |
| siR_241180 | 1. 6307  | 0. 01   | -7. 34934759  | 4. 61E-14    | ** |
| siR_241183 | 8. 7207  | 0. 01   | -9. 76830018  | 4. 28E-72    | ** |
| siR_24125  | 0. 01    | 1. 0442 | 6. 70625425   | 1. 77E-09    | ** |
| siR_24126  | 1. 418   | 1. 3799 | -0. 03929381  | 0. 908620659 | ** |
| siR_241276 | 12. 8683 | 0. 01   | -10. 32960581 | 4. 82E-106   | ** |
| siR_241286 | 1. 2053  | 0. 01   | -6. 91324847  | 1. 40E-10    | ** |
| siR_241310 | 5. 4238  | 0. 01   | -9. 08316017  | 4. 14E-45    | ** |
| siR_241314 | 9. 6778  | 0. 01   | -9. 9185353   | 6. 27E-80    | ** |
| siR_241333 | 1. 0989  | 0. 01   | -6. 7799163   | 1. 04E-09    | ** |
| siR_241342 | 3. 3323  | 0. 01   | -8. 38037447  | 5. 44E-28    | ** |
| siR_241346 | 1. 3116  | 0. 01   | -7. 035184    | 1. 88E-11    | ** |
| siR_241356 | 6. 2392  | 0. 01   | -9. 28521723  | 8. 77E-52    | ** |
| siR_241378 | 3. 4386  | 0. 01   | -8. 42567749  | 7. 34E-29    | ** |
| siR_241380 | 6. 0619  | 0. 01   | -9. 24362624  | 2. 48E-50    | ** |
| siR_241411 | 1. 0635  | 0. 01   | -6. 73267622  | 2. 02E-09    | ** |
| siR_241431 | 4. 1476  | 0. 01   | -8. 69613295  | 1. 15E-34    | ** |
| siR_241476 | 1. 4534  | 0. 01   | -7. 18328801  | 1. 30E-12    | ** |
| siR_241479 | 30. 6642 | 0. 01   | -11. 58233954 | 1. 06E-251   | ** |
| siR_241494 | 1. 3471  | 0. 01   | -7. 07371314  | 9. 66E-12    | ** |
| siR_24150  | 4. 4312  | 3. 8413 | -0. 2061028   | 0. 284305855 | ** |
| siR_241672 | 1. 4889  | 0. 01   | -7. 21810305  | 6. 67E-13    | ** |

|            |          |        |              |             |    |
|------------|----------|--------|--------------|-------------|----|
| siR_241677 | 1.3825   | 0.01   | -7.11113566  | 4.95E-12    | ** |
| siR_241710 | 455.3901 | 0.01   | -15.47481498 | 0           | ** |
| siR_241711 | 1.5243   | 0.01   | -7.25200305  | 3.42E-13    | ** |
| siR_241723 | 43.7098  | 0.01   | -12.09374135 | 0           | ** |
| siR_24181  | 6.1328   | 1.3053 | -2.23216448  | 7.39E-22    | ** |
| siR_241849 | 1.2762   | 0.01   | -6.99571063  | 3.67E-11    | ** |
| siR_24188  | 2.4106   | 1.3053 | -0.88501086  | 0.002658959 |    |
| siR_241895 | 9.3942   | 0.01   | -9.8756265   | 1.31E-77    | ** |
| siR_241928 | 1.4889   | 0.01   | -7.21810305  | 6.67E-13    | ** |
| siR_241954 | 5.8492   | 0.01   | -9.19209551  | 1.36E-48    | ** |
| siR_241981 | 7.3027   | 0.01   | -9.5122862   | 1.73E-60    | ** |
| siR_242029 | 23.2552  | 0.01   | -11.18333747 | 4.64E-191   | ** |
| siR_242052 | 1.3825   | 0.01   | -7.11113566  | 4.95E-12    | ** |
| siR_242064 | 2.2333   | 0.01   | -7.80303324  | 5.38E-19    | ** |
| siR_242068 | 4.6794   | 0.01   | -8.87017976  | 5.13E-39    | ** |
| siR_24207  | 1.6307   | 0.2611 | -2.64281703  | 6.26E-08    | ** |
| siR_242137 | 1.4889   | 0.01   | -7.21810305  | 6.67E-13    | ** |
| siR_24218  | 10.245   | 3.5056 | -1.54718669  | 3.00E-22    | ** |
| siR_242211 | 2.8714   | 0.01   | -8.16561052  | 3.22E-24    | ** |
| siR_242256 | 5.4593   | 0.01   | -9.09257214  | 2.12E-45    | ** |
| siR_242288 | 2.3751   | 0.01   | -7.89184446  | 3.72E-20    | ** |
| siR_242379 | 1.2762   | 0.01   | -6.99571063  | 3.67E-11    | ** |
| siR_242485 | 1.7016   | 0.01   | -7.41074813  | 1.21E-14    | ** |
| siR_24252  | 0.01     | 9.0624 | 9.82374936   | 1.35E-76    | ** |
| siR_242525 | 4.7148   | 0.01   | -8.88105279  | 2.63E-39    | ** |
| siR_242528 | 1.0635   | 0.01   | -6.73267622  | 2.02E-09    | ** |
| siR_242612 | 1.7725   | 0.01   | -7.46964183  | 3.18E-15    | ** |
| siR_242614 | 1.0989   | 0.01   | -6.7799163   | 1.04E-09    | ** |
| siR_242681 | 2.5524   | 0.01   | -7.99571063  | 1.32E-21    | ** |
| siR_2427   | 0.01     | 1.4172 | 7.14689956   | 1.34E-12    | ** |
| siR_242754 | 1.3825   | 0.01   | -7.11113566  | 4.95E-12    | ** |
| siR_242790 | 1.5952   | 0.01   | -7.31759351  | 8.99E-14    | ** |
| siR_242824 | 1.8788   | 0.01   | -7.55366769  | 4.29E-16    | ** |
| siR_242852 | 5.282    | 0.01   | -9.04494046  | 5.99E-44    | ** |
| siR_242855 | 5.9201   | 0.01   | -9.2094777   | 3.58E-49    | ** |
| siR_242974 | 19.9938  | 0.01   | -10.96533712 | 2.30E-164   | ** |
| siR_242979 | 3.1196   | 0.01   | -8.28521723  | 3.00E-26    | ** |
| siR_24303  | 4.9984   | 2.797  | -0.8375861   | 3.42E-05    |    |
| siR_243031 | 1.6661   | 0.01   | -7.38033118  | 2.36E-14    | ** |
| siR_24307  | 5.6365   | 1.6409 | -1.78031227  | 2.04E-15    | ** |
| siR_243081 | 1.2053   | 0.01   | -6.91324847  | 1.40E-10    | ** |
| siR_243111 | 2.1979   | 0.01   | -7.77998195  | 1.05E-18    | ** |
| siR_243139 | 2.2333   | 0.01   | -7.80303324  | 5.38E-19    | ** |
| siR_243148 | 4.9275   | 0.01   | -8.94471205  | 4.77E-41    | ** |
| siR_24317  | 1.3825   | 1.2307 | -0.16780035  | 0.627937326 |    |
| siR_24324  | 1.4889   | 1.4172 | -0.07120349  | 0.82956068  |    |
| siR_24325  | 20.9864  | 10.666 | -0.97643548  | 3.47E-22    |    |

|            |         |         |              |             |    |
|------------|---------|---------|--------------|-------------|----|
| siR_243250 | 2.0206  | 0.01    | -7.65863995  | 2.96E-17    | ** |
| siR_243257 | 3.3323  | 0.01    | -8.38037447  | 5.44E-28    | ** |
| siR_243306 | 1.9497  | 0.01    | -7.60710834  | 1.13E-16    | ** |
| siR_243309 | 2.2688  | 0.01    | -7.82578561  | 2.76E-19    | ** |
| siR_243317 | 1.5243  | 0.01    | -7.25200305  | 3.42E-13    | ** |
| siR_24333  | 0.01    | 1.7901  | 7.48389637   | 1.01E-15    | ** |
| siR_243377 | 2.4815  | 0.01    | -7.95506863  | 5.01E-21    | ** |
| siR_243404 | 4.4667  | 0.01    | -8.80306553  | 2.82E-37    | ** |
| siR_243446 | 3.5804  | 0.01    | -8.48397698  | 5.07E-30    | ** |
| siR_243532 | 2.8005  | 0.01    | -8.12954063  | 1.23E-23    | ** |
| siR_24354  | 1.2053  | 0.3729  | -1.69253158  | 0.000467353 | ** |
| siR_243568 | 4.7148  | 0.01    | -8.88105279  | 2.63E-39    | ** |
| siR_24367  | 0.01    | 29.2011 | 11.511807    | 3.56E-245   | ** |
| siR_243702 | 1.028   | 0.01    | -6.68369645  | 3.95E-09    | ** |
| siR_24373  | 0.01    | 81.4871 | 12.99235597  | 0           | ** |
| siR_24374  | 0.01    | 7.1977  | 9.49139216   | 5.47E-61    | ** |
| siR_24375  | 0.01    | 1.0815  | 6.75688986   | 8.62E-10    | ** |
| siR_24380  | 0.01    | 28.94   | 11.49884921  | 5.46E-243   | ** |
| siR_24381  | 0.01    | 1.1188  | 6.80580835   | 4.20E-10    | ** |
| siR_24386  | 0.01    | 2.3495  | 7.87620996   | 2.10E-20    | ** |
| siR_243861 | 1.0635  | 0.01    | -6.73267622  | 2.02E-09    | ** |
| siR_243869 | 4.1476  | 0.01    | -8.69613295  | 1.15E-34    | ** |
| siR_24387  | 0.01    | 1.3426  | 7.06888574   | 5.63E-12    | ** |
| siR_24392  | 0.01    | 1.4172  | 7.14689956   | 1.34E-12    | ** |
| siR_24409  | 1.8079  | 0.8578  | -1.07560166  | 0.002277255 | ** |
| siR_244121 | 1.5243  | 0.01    | -7.25200305  | 3.42E-13    | ** |
| siR_244123 | 40.3066 | 0.01    | -11.97680053 | 0           | ** |
| siR_24417  | 0.01    | 5.9297  | 9.21181531   | 2.25E-50    | ** |
| siR_244291 | 3.5095  | 0.01    | -8.45512172  | 1.93E-29    | ** |
| siR_24439  | 0.01    | 4.7736  | 8.89893387   | 1.07E-40    | ** |
| siR_244392 | 1.5952  | 0.01    | -7.31759351  | 8.99E-14    | ** |
| siR_24450  | 2.5169  | 0.5221  | -2.26924983  | 6.19E-10    | ** |
| siR_24452  | 6.9482  | 7.5707  | 0.12378742   | 0.391278891 |    |
| siR_244527 | 2.4815  | 0.01    | -7.95506863  | 5.01E-21    | ** |
| siR_244579 | 3.864   | 0.01    | -8.59395129  | 2.42E-32    | ** |
| siR_244678 | 1.028   | 0.01    | -6.68369645  | 3.95E-09    | ** |
| siR_244725 | 1.0989  | 0.01    | -6.7799163   | 1.04E-09    | ** |
| siR_244740 | 7.3027  | 0.01    | -9.5122862   | 1.73E-60    | ** |
| siR_244819 | 3.3677  | 0.01    | -8.39561983  | 2.79E-28    | ** |
| siR_24485  | 2.2333  | 1.0815  | -1.0461434   | 0.000895443 | ** |
| siR_244856 | 2.836   | 0.01    | -8.14771372  | 6.28E-24    | ** |
| siR_24487  | 2.3042  | 0.8951  | -1.36414517  | 3.16E-05    | ** |
| siR_244886 | 1.0635  | 0.01    | -6.73267622  | 2.02E-09    | ** |
| siR_24497  | 1.5952  | 0.8951  | -0.83361654  | 0.020601448 |    |
| siR_24511  | 0.01    | 3.9531  | 8.62684064   | 7.90E-34    | ** |
| siR_245136 | 2.6587  | 0.01    | -8.05457718  | 1.77E-22    | ** |
| siR_245202 | 3.6868  | 0.01    | -8.52622535  | 6.83E-31    | ** |

|            |         |         |              |             |    |
|------------|---------|---------|--------------|-------------|----|
| siR_245208 | 5.2466  | 0.01    | -9.03523897  | 1.17E-43    | ** |
| siR_245222 | 1.0635  | 0.01    | -6.73267622  | 2.02E-09    | ** |
| siR_245226 | 1.2053  | 0.01    | -6.91324847  | 1.40E-10    | ** |
| siR_245268 | 1.6307  | 0.01    | -7.34934759  | 4.61E-14    | ** |
| siR_245321 | 1.5598  | 0.01    | -7.28521726  | 1.75E-13    | ** |
| siR_24536  | 1.2053  | 0.4475  | -1.42943269  | 0.001965568 | ** |
| siR_245368 | 1.2407  | 0.01    | -6.95501051  | 7.17E-11    | ** |
| siR_245389 | 6.8418  | 0.01    | -9.41823209  | 1.02E-56    | ** |
| siR_2454   | 18.9657 | 3.5429  | -2.42038997  | 9.07E-71    | ** |
| siR_245414 | 2.6587  | 0.01    | -8.05457718  | 1.77E-22    | ** |
| siR_245438 | 3.5095  | 0.01    | -8.45512172  | 1.93E-29    | ** |
| siR_245466 | 3.3323  | 0.01    | -8.38037447  | 5.44E-28    | ** |
| siR_245474 | 1.028   | 0.01    | -6.68369645  | 3.95E-09    | ** |
| siR_245477 | 1.418   | 0.01    | -7.14771372  | 2.54E-12    | ** |
| siR_24557  | 0.6381  | 1.1934  | 0.90322324   | 0.031509144 |    |
| siR_245648 | 1.7016  | 0.01    | -7.41074813  | 1.21E-14    | ** |
| siR_245662 | 5.672   | 0.01    | -9.14771376  | 3.85E-47    | ** |
| siR_245693 | 1.2053  | 0.01    | -6.91324847  | 1.40E-10    | ** |
| siR_2457   | 83.3428 | 12.5307 | -2.73359056  | 0           | ** |
| siR_245700 | 9.6778  | 0.01    | -9.9185353   | 6.27E-80    | ** |
| siR_245702 | 1.3116  | 0.01    | -7.035184    | 1.88E-11    | ** |
| siR_24573  | 0.01    | 2.4241  | 7.9213054    | 4.98E-21    | ** |
| siR_24574  | 0.8508  | 1.1934  | 0.48818574   | 0.210653598 |    |
| siR_245750 | 8.1535  | 0.01    | -9.67127563  | 1.88E-67    | ** |
| siR_245754 | 1.2762  | 0.01    | -6.99571063  | 3.67E-11    | ** |
| siR_245770 | 1.5243  | 0.01    | -7.25200305  | 3.42E-13    | ** |
| siR_245775 | 3.4032  | 0.01    | -8.41074813  | 1.43E-28    | ** |
| siR_245841 | 2.3042  | 0.01    | -7.84812212  | 1.41E-19    | ** |
| siR_245857 | 2.5169  | 0.01    | -7.97550407  | 2.57E-21    | ** |
| siR_2459   | 1.4889  | 0.1492  | -3.31892742  | 7.40E-09    | ** |
| siR_245907 | 1.8788  | 0.01    | -7.55366769  | 4.29E-16    | ** |
| siR_245929 | 21.0218 | 0.01    | -11.03767036 | 8.85E-173   | ** |
| siR_245931 | 1.3471  | 0.01    | -7.07371314  | 9.66E-12    | ** |
| siR_246    | 6.0265  | 2.2749  | -1.40551724  | 4.57E-12    | ** |
| siR_2461   | 1.5598  | 0.2238  | -2.80107912  | 4.88E-08    | ** |
| siR_246243 | 4.6439  | 0.01    | -8.85919308  | 1.00E-38    | ** |
| siR_246267 | 1.2053  | 0.01    | -6.91324847  | 1.40E-10    | ** |
| siR_246328 | 1.028   | 0.01    | -6.68369645  | 3.95E-09    | ** |
| siR_246365 | 6.1328  | 0.01    | -9.26040207  | 6.51E-51    | ** |
| siR_246395 | 5.282   | 0.01    | -9.04494046  | 5.99E-44    | ** |
| siR_246405 | 1.028   | 0.01    | -6.68369645  | 3.95E-09    | ** |
| siR_246504 | 2.1624  | 0.01    | -7.75648961  | 2.05E-18    | ** |
| siR_246533 | 1.9852  | 0.01    | -7.63314056  | 5.78E-17    | ** |
| siR_246551 | 5.8138  | 0.01    | -9.18333764  | 2.66E-48    | ** |
| siR_246595 | 1.2407  | 0.01    | -6.95501051  | 7.17E-11    | ** |
| siR_246700 | 1.3471  | 0.01    | -7.07371314  | 9.66E-12    | ** |
| siR_246717 | 5.282   | 0.01    | -9.04494046  | 5.99E-44    | ** |

|            |         |        |              |             |    |
|------------|---------|--------|--------------|-------------|----|
| siR_246718 | 1.028   | 0.01   | -6.68369645  | 3.95E-09    | ** |
| siR_2469   | 0.01    | 1.0069 | 6.6537766    | 3.63E-09    | ** |
| siR_246911 | 1.028   | 0.01   | -6.68369645  | 3.95E-09    | ** |
| siR_24701  | 0.9571  | 1.0069 | 0.07317884   | 0.850192588 |    |
| siR_24702  | 1.6307  | 0.5221 | -1.64309333  | 6.28E-05    | ** |
| siR_247033 | 9.7842  | 0.01   | -9.93431004  | 8.45E-81    | ** |
| siR_247167 | 1.4534  | 0.01   | -7.18328801  | 1.30E-12    | ** |
| siR_247231 | 1.028   | 0.01   | -6.68369645  | 3.95E-09    | ** |
| siR_247262 | 1.4534  | 0.01   | -7.18328801  | 1.30E-12    | ** |
| siR_247309 | 4.7148  | 0.01   | -8.88105279  | 2.63E-39    | ** |
| siR_247313 | 1.9852  | 0.01   | -7.63314056  | 5.78E-17    | ** |
| siR_247354 | 1.3825  | 0.01   | -7.11113566  | 4.95E-12    | ** |
| siR_247355 | 6.5582  | 0.01   | -9.35715612  | 2.15E-54    | ** |
| siR_247358 | 5.4238  | 0.01   | -9.08316017  | 4.14E-45    | ** |
| siR_247369 | 2.1979  | 0.01   | -7.77998195  | 1.05E-18    | ** |
| siR_247382 | 1.8434  | 0.01   | -7.52622535  | 8.37E-16    | ** |
| siR_24755  | 4.8921  | 2.2003 | -1.15275365  | 9.35E-08    | ** |
| siR_2476   | 1.0989  | 0.8205 | -0.42148487  | 0.29881012  |    |
| siR_247653 | 4.573   | 0.01   | -8.83699711  | 3.81E-38    | ** |
| siR_247676 | 1.3116  | 0.01   | -7.035184    | 1.88E-11    | ** |
| siR_247681 | 6.8418  | 0.01   | -9.41823209  | 1.02E-56    | ** |
| siR_247816 | 3.2968  | 0.01   | -8.36492254  | 1.06E-27    | ** |
| siR_247853 | 1.737   | 0.01   | -7.44045394  | 6.21E-15    | ** |
| siR_247861 | 1.1698  | 0.01   | -6.87011809  | 2.73E-10    | ** |
| siR_247899 | 9.1815  | 0.01   | -9.842586    | 7.24E-76    | ** |
| siR_247913 | 5.282   | 0.01   | -9.04494046  | 5.99E-44    | ** |
| siR_247928 | 1.9497  | 0.01   | -7.60710834  | 1.13E-16    | ** |
| siR_24806  | 4.3958  | 0.5221 | -3.07372768  | 3.03E-22    | ** |
| siR_248152 | 5.7074  | 0.01   | -9.15668986  | 1.97E-47    | ** |
| siR_248295 | 3.6159  | 0.01   | -8.49821097  | 2.60E-30    | ** |
| siR_248333 | 28.4309 | 0.01   | -11.47324399 | 2.01E-233   | ** |
| siR_248366 | 17.0514 | 0.01   | -10.7356745  | 2.78E-140   | ** |
| siR_248371 | 13.0456 | 0.01   | -10.34934754 | 1.71E-107   | ** |
| siR_248445 | 1.1698  | 0.01   | -6.87011809  | 2.73E-10    | ** |
| siR_248457 | 11.4149 | 0.01   | -10.15670246 | 3.80E-94    | ** |
| siR_248483 | 1.1698  | 0.01   | -6.87011809  | 2.73E-10    | ** |
| siR_24849  | 0.01    | 1.4918 | 7.22091032   | 3.17E-13    | ** |
| siR_248491 | 3.2968  | 0.01   | -8.36492254  | 1.06E-27    | ** |
| siR_248533 | 1.3471  | 0.01   | -7.07371314  | 9.66E-12    | ** |
| siR_248571 | 1.3471  | 0.01   | -7.07371314  | 9.66E-12    | ** |
| siR_248676 | 4.8212  | 0.01   | -8.91324847  | 3.54E-40    | ** |
| siR_248689 | 6.2392  | 0.01   | -9.28521723  | 8.77E-52    | ** |
| siR_248711 | 1.8788  | 0.01   | -7.55366769  | 4.29E-16    | ** |
| siR_24872  | 1.5598  | 0.4102 | -1.92696166  | 1.27E-05    | ** |
| siR_248762 | 2.4815  | 0.01   | -7.95506863  | 5.01E-21    | ** |
| siR_248763 | 1.9852  | 0.01   | -7.63314056  | 5.78E-17    | ** |
| siR_248772 | 5.1402  | 0.01   | -9.00568068  | 8.67E-43    | ** |

|            |         |         |              |             |    |
|------------|---------|---------|--------------|-------------|----|
| siR_248773 | 4.963   | 0.01    | -8.95506867  | 2.45E-41    | ** |
| siR_248781 | 11.9466 | 0.01    | -10.22238444 | 1.69E-98    | ** |
| siR_248782 | 11.0958 | 0.01    | -10.11579799 | 1.55E-91    | ** |
| siR_248783 | 6.6646  | 0.01    | -9.38037452  | 2.89E-55    | ** |
| siR_248784 | 6.5937  | 0.01    | -9.36494442  | 1.10E-54    | ** |
| siR_248785 | 6.3101  | 0.01    | -9.30151909  | 2.30E-52    | ** |
| siR_248786 | 2.1979  | 0.01    | -7.77998195  | 1.05E-18    | ** |
| siR_248787 | 1.4889  | 0.01    | -7.21810305  | 6.67E-13    | ** |
| siR_248788 | 1.3471  | 0.01    | -7.07371314  | 9.66E-12    | ** |
| siR_248798 | 1.418   | 0.01    | -7.14771372  | 2.54E-12    | ** |
| siR_248815 | 5.672   | 0.01    | -9.14771376  | 3.85E-47    | ** |
| siR_248824 | 8.4016  | 0.01    | -9.71452026  | 1.75E-69    | ** |
| siR_248825 | 5.1048  | 0.01    | -8.99571063  | 1.69E-42    | ** |
| siR_248826 | 4.0058  | 0.01    | -8.64594661  | 1.67E-33    | ** |
| siR_248827 | 2.127   | 0.01    | -7.73267621  | 3.99E-18    | ** |
| siR_248828 | 1.8788  | 0.01    | -7.55366769  | 4.29E-16    | ** |
| siR_248829 | 1.028   | 0.01    | -6.68369645  | 3.95E-09    | ** |
| siR_248889 | 1.0635  | 0.01    | -6.73267622  | 2.02E-09    | ** |
| siR_24890  | 2.0561  | 1.1188  | -0.87795827  | 0.005908241 |    |
| siR_248989 | 3.3677  | 0.01    | -8.39561983  | 2.79E-28    | ** |
| siR_249107 | 2.5878  | 0.01    | -8.0155823   | 6.75E-22    | ** |
| siR_24911  | 2.2688  | 1.6409  | -0.46744212  | 0.097892977 |    |
| siR_249178 | 65.5115 | 0.01    | -12.67753205 | 0           | ** |
| siR_249221 | 1.3116  | 0.01    | -7.035184    | 1.88E-11    | ** |
| siR_249250 | 4.1476  | 0.01    | -8.69613295  | 1.15E-34    | ** |
| siR_249301 | 1.418   | 0.01    | -7.14771372  | 2.54E-12    | ** |
| siR_249304 | 1.0635  | 0.01    | -6.73267622  | 2.02E-09    | ** |
| siR_249325 | 1.6307  | 0.01    | -7.34934759  | 4.61E-14    | ** |
| siR_249429 | 1.9852  | 0.01    | -7.63314056  | 5.78E-17    | ** |
| siR_24946  | 2.5524  | 1.0069  | -1.34193403  | 1.50E-05    | ** |
| siR_249490 | 1.1698  | 0.01    | -6.87011809  | 2.73E-10    | ** |
| siR_24960  | 5.9556  | 8.0928  | 0.44239208   | 0.002746831 |    |
| siR_249679 | 3.1196  | 0.01    | -8.28521723  | 3.00E-26    | ** |
| siR_249687 | 4.1831  | 0.01    | -8.70842867  | 5.92E-35    | ** |
| siR_249709 | 1.3116  | 0.01    | -7.035184    | 1.88E-11    | ** |
| siR_249803 | 7.6926  | 0.01    | -9.58732748  | 1.11E-63    | ** |
| siR_249811 | 1.2407  | 0.01    | -6.95501051  | 7.17E-11    | ** |
| siR_249848 | 1.3471  | 0.01    | -7.07371314  | 9.66E-12    | ** |
| siR_2499   | 0.01    | 10.2558 | 10.00222432  | 1.38E-86    | ** |
| siR_249948 | 3.0132  | 0.01    | -8.23515263  | 2.23E-25    | ** |
| siR_24995  | 1.028   | 0.4848  | -1.08437866  | 0.021479092 | *  |
| siR_249971 | 1.0989  | 0.01    | -6.7799163   | 1.04E-09    | ** |
| siR_25006  | 1.0989  | 0.1119  | -3.29577817  | 8.66E-07    | ** |
| siR_25008  | 1.3471  | 0.3729  | -1.85299625  | 8.02E-05    | ** |
| siR_25014  | 3.4386  | 2.8716  | -0.2599665   | 0.239046441 |    |
| siR_250284 | 2.7296  | 0.01    | -8.09254576  | 4.66E-23    | ** |
| siR_2503   | 0.01    | 13.3139 | 10.37871752  | 3.47E-112   | ** |



|            |         |          |               |              |    |
|------------|---------|----------|---------------|--------------|----|
| siR_250312 | 1. 3116 | 0. 01    | -7. 035184    | 1. 88E-11    | ** |
| siR_25033  | 1. 8079 | 0. 9696  | -0. 89885328  | 0. 008533461 |    |
| siR_250373 | 1. 0635 | 0. 01    | -6. 73267622  | 2. 02E-09    | ** |
| siR_250394 | 2. 3042 | 0. 01    | -7. 84812212  | 1. 41E-19    | ** |
| siR_2504   | 0. 01   | 3. 0208  | 8. 23878686   | 5. 04E-26    | ** |
| siR_250402 | 1. 0635 | 0. 01    | -6. 73267622  | 2. 02E-09    | ** |
| siR_250457 | 3. 4741 | 0. 01    | -8. 44049549  | 3. 76E-29    | ** |
| siR_250471 | 1. 3116 | 0. 01    | -7. 035184    | 1. 88E-11    | ** |
| siR_25049  | 1. 5598 | 0. 4848  | -1. 68589945  | 6. 78E-05    | ** |
| siR_25051  | 0. 01   | 1. 1188  | 6. 80580835   | 4. 20E-10    | ** |
| siR_250525 | 3. 545  | 0. 01    | -8. 4696418   | 9. 89E-30    | ** |
| siR_250590 | 1. 5243 | 0. 01    | -7. 25200305  | 3. 42E-13    | ** |
| siR_250594 | 1. 6307 | 0. 01    | -7. 34934759  | 4. 61E-14    | ** |
| siR_250610 | 2. 0915 | 0. 01    | -7. 70839418  | 7. 79E-18    | ** |
| siR_250801 | 2. 2333 | 0. 01    | -7. 80303324  | 5. 38E-19    | ** |
| siR_250817 | 4. 3958 | 0. 01    | -8. 77998192  | 1. 07E-36    | ** |
| siR_250879 | 7. 3027 | 0. 01    | -9. 5122862   | 1. 73E-60    | ** |
| siR_250900 | 24. 815 | 0. 01    | -11. 27699662 | 7. 94E-204   | ** |
| siR_250992 | 1. 0989 | 0. 01    | -6. 7799163   | 1. 04E-09    | ** |
| siR_251032 | 1. 1344 | 0. 01    | -6. 82578563  | 5. 32E-10    | ** |
| siR_251034 | 1. 418  | 0. 01    | -7. 14771372  | 2. 54E-12    | ** |
| siR_251089 | 4. 9984 | 0. 01    | -8. 96532255  | 1. 25E-41    | ** |
| siR_251106 | 1. 8788 | 0. 01    | -7. 55366769  | 4. 29E-16    | ** |
| siR_251132 | 1. 1344 | 0. 01    | -6. 82578563  | 5. 32E-10    | ** |
| siR_251185 | 6. 7355 | 0. 01    | -9. 39564121  | 7. 60E-56    | ** |
| siR_251188 | 5. 0339 | 0. 01    | -8. 97553276  | 6. 43E-42    | ** |
| siR_251191 | 1. 2762 | 0. 01    | -6. 99571063  | 3. 67E-11    | ** |
| siR_251196 | 1. 0989 | 0. 01    | -6. 7799163   | 1. 04E-09    | ** |
| siR_2512   | 0. 01   | 1. 7901  | 7. 48389637   | 1. 01E-15    | ** |
| siR_251209 | 2. 5524 | 0. 01    | -7. 99571063  | 1. 32E-21    | ** |
| siR_25122  | 1. 2407 | 0. 4848  | -1. 35569271  | 0. 002535804 | ** |
| siR_251307 | 2. 1979 | 0. 01    | -7. 77998195  | 1. 05E-18    | ** |
| siR_251308 | 1. 5243 | 0. 01    | -7. 25200305  | 3. 42E-13    | ** |
| siR_251387 | 2. 0206 | 0. 01    | -7. 65863995  | 2. 96E-17    | ** |
| siR_251411 | 1. 0635 | 0. 01    | -6. 73267622  | 2. 02E-09    | ** |
| siR_251438 | 4. 1476 | 0. 01    | -8. 69613295  | 1. 15E-34    | ** |
| siR_251583 | 1. 1698 | 0. 01    | -6. 87011809  | 2. 73E-10    | ** |
| siR_25161  | 6. 8064 | 2. 536   | -1. 42433719  | 1. 09E-13    | ** |
| siR_251613 | 3. 3677 | 0. 01    | -8. 39561983  | 2. 79E-28    | ** |
| siR_25163  | 1. 0635 | 0. 1492  | -2. 83350059  | 6. 84E-06    | ** |
| siR_251643 | 1. 2762 | 0. 01    | -6. 99571063  | 3. 67E-11    | ** |
| siR_251786 | 4. 1476 | 0. 01    | -8. 69613295  | 1. 15E-34    | ** |
| siR_251787 | 2. 4815 | 0. 01    | -7. 95506863  | 5. 01E-21    | ** |
| siR_251797 | 2. 9069 | 0. 01    | -8. 18333764  | 1. 65E-24    | ** |
| siR_2518   | 0. 01   | 20. 9964 | 11. 03592627  | 1. 70E-176   | ** |
| siR_2519   | 0. 01   | 1. 3053  | 7. 02823761   | 1. 15E-11    | ** |
| siR_251937 | 1. 3116 | 0. 01    | -7. 035184    | 1. 88E-11    | ** |

|            |          |         |              |             |    |
|------------|----------|---------|--------------|-------------|----|
| siR_25202  | 6.8773   | 0.4102  | -4.06744288  | 1.11E-42    | ** |
| siR_25203  | 1.9497   | 0.2611  | -2.90057779  | 4.66E-10    | ** |
| siR_25209  | 1.028    | 0.634   | -0.69728552  | 0.113380175 |    |
| siR_252126 | 1.9852   | 0.01    | -7.63314056  | 5.78E-17    | ** |
| siR_25213  | 1.9143   | 0.634   | -1.59426219  | 2.13E-05    | ** |
| siR_252132 | 2.446    | 0.01    | -7.93428061  | 9.77E-21    | ** |
| siR_252475 | 280.3737 | 0.01    | -14.77506274 | 0           | ** |
| siR_252476 | 2.9423   | 0.01    | -8.20080054  | 8.47E-25    | ** |
| siR_252597 | 8.0826   | 0.01    | -9.65867569  | 7.16E-67    | ** |
| siR_252656 | 1.9852   | 0.01    | -7.63314056  | 5.78E-17    | ** |
| siR_25274  | 1.9143   | 0.7459  | -1.35976281  | 0.000158111 | ** |
| siR_25275  | 4.7148   | 1.5663  | -1.58983601  | 2.12E-11    | ** |
| siR_252793 | 1.8079   | 0.01    | -7.49817107  | 1.63E-15    | ** |
| siR_25281  | 2.5169   | 0.634   | -1.98909315  | 1.26E-08    | ** |
| siR_252986 | 11.5567  | 0.01    | -10.17451381 | 2.63E-95    | ** |
| siR_2530   | 1.3116   | 0.5594  | -1.22937565  | 0.003968625 | ** |
| siR_253570 | 2.3751   | 0.01    | -7.89184446  | 3.72E-20    | ** |
| siR_253577 | 6.3101   | 0.01    | -9.30151909  | 2.30E-52    | ** |
| siR_253680 | 2.3397   | 0.01    | -7.87017976  | 7.25E-20    | ** |
| siR_253694 | 19.9583  | 0.01    | -10.96277306 | 4.48E-164   | ** |
| siR_25371  | 1.4534   | 0.7086  | -1.03638844  | 0.008088782 | ** |
| siR_253723 | 1.2762   | 0.01    | -6.99571063  | 3.67E-11    | ** |
| siR_25385  | 1.2053   | 0.1865  | -2.69214474  | 2.94E-06    | ** |
| siR_25388  | 6.3455   | 5.0347  | -0.33382803  | 0.042045241 |    |
| siR_25392  | 125.5283 | 59.2227 | -1.08379048  | 4.86E-147   | ** |
| siR_253927 | 7.4799   | 0.01    | -9.54687514  | 6.13E-62    | ** |
| siR_253939 | 2.6942   | 0.01    | -8.07371315  | 9.10E-23    | ** |
| siR_2540   | 1.0635   | 0.4102  | -1.37442064  | 0.004842593 | ** |
| siR_25402  | 1.8079   | 1.0815  | -0.74128122  | 0.025750103 |    |
| siR_25407  | 13.0101  | 3.9531  | -1.7185757   | 4.31E-32    | ** |
| siR_254088 | 1.1344   | 0.01    | -6.82578563  | 5.32E-10    | ** |
| siR_254164 | 2.1979   | 0.01    | -7.77998195  | 1.05E-18    | ** |
| siR_254229 | 1.1344   | 0.01    | -6.82578563  | 5.32E-10    | ** |
| siR_254230 | 1.028    | 0.01    | -6.68369645  | 3.95E-09    | ** |
| siR_254265 | 1.1698   | 0.01    | -6.87011809  | 2.73E-10    | ** |
| siR_254287 | 1.3116   | 0.01    | -7.035184    | 1.88E-11    | ** |
| siR_254330 | 1.2762   | 0.01    | -6.99571063  | 3.67E-11    | ** |
| siR_254423 | 2.0915   | 0.01    | -7.70839418  | 7.79E-18    | ** |
| siR_254424 | 1.8434   | 0.01    | -7.52622535  | 8.37E-16    | ** |
| siR_254425 | 1.3825   | 0.01    | -7.11113566  | 4.95E-12    | ** |
| siR_254456 | 2.1624   | 0.01    | -7.75648961  | 2.05E-18    | ** |
| siR_254465 | 1.4534   | 0.01    | -7.18328801  | 1.30E-12    | ** |
| siR_254466 | 1.2053   | 0.01    | -6.91324847  | 1.40E-10    | ** |
| siR_2546   | 0.01     | 2.536   | 7.98641094   | 5.76E-22    | ** |
| siR_254712 | 2.5524   | 0.01    | -7.99571063  | 1.32E-21    | ** |
| siR_254986 | 1.3471   | 0.01    | -7.07371314  | 9.66E-12    | ** |
| siR_255016 | 1.1344   | 0.01    | -6.82578563  | 5.32E-10    | ** |

|            |          |          |               |              |    |
|------------|----------|----------|---------------|--------------|----|
| siR_255094 | 2. 5169  | 0. 01    | -7. 97550407  | 2. 57E-21    | ** |
| siR_255095 | 1. 4889  | 0. 01    | -7. 21810305  | 6. 67E-13    | ** |
| siR_255131 | 2. 3397  | 0. 01    | -7. 87017976  | 7. 25E-20    | ** |
| siR_255146 | 1. 0989  | 0. 01    | -6. 7799163   | 1. 04E-09    | ** |
| siR_255156 | 1. 4889  | 0. 01    | -7. 21810305  | 6. 67E-13    | ** |
| siR_255157 | 1. 2407  | 0. 01    | -6. 95501051  | 7. 17E-11    | ** |
| siR_25523  | 0. 01    | 2. 1258  | 7. 73186206   | 1. 57E-18    | ** |
| siR_255292 | 3. 4386  | 0. 01    | -8. 42567749  | 7. 34E-29    | ** |
| siR_255325 | 1. 6307  | 0. 01    | -7. 34934759  | 4. 61E-14    | ** |
| siR_255342 | 2. 127   | 0. 01    | -7. 73267621  | 3. 99E-18    | ** |
| siR_255370 | 1. 3116  | 0. 01    | -7. 035184    | 1. 88E-11    | ** |
| siR_25539  | 0. 01    | 1. 6782  | 7. 39077085   | 8. 72E-15    | ** |
| siR_25541  | 1. 8079  | 0. 8578  | -1. 07560166  | 0. 002277255 | ** |
| siR_255441 | 1. 2053  | 0. 01    | -6. 91324847  | 1. 40E-10    | ** |
| siR_255446 | 1. 028   | 0. 01    | -6. 68369645  | 3. 95E-09    | ** |
| siR_255469 | 4. 4312  | 0. 01    | -8. 79155366  | 5. 51E-37    | ** |
| siR_25550  | 0. 01    | 2. 3122  | 7. 85312238   | 4. 30E-20    | ** |
| siR_25557  | 3. 2259  | 1. 4918  | -1. 11264759  | 2. 59E-05    | ** |
| siR_25558  | 1. 8079  | 0. 3356  | -2. 42950026  | 5. 31E-08    | ** |
| siR_255633 | 5. 282   | 0. 01    | -9. 04494046  | 5. 99E-44    | ** |
| siR_255733 | 2. 3751  | 0. 01    | -7. 89184446  | 3. 72E-20    | ** |
| siR_255816 | 1. 4534  | 0. 01    | -7. 18328801  | 1. 30E-12    | ** |
| siR_25588  | 3. 2968  | 0. 5594  | -2. 55911421  | 2. 68E-14    | ** |
| siR_2559   | 0. 01    | 1. 3053  | 7. 02823761   | 1. 15E-11    | ** |
| siR_255969 | 2. 6942  | 0. 01    | -8. 07371315  | 9. 10E-23    | ** |
| siR_25600  | 0. 01    | 17. 1552 | 10. 74443023  | 2. 43E-144   | ** |
| siR_256008 | 3. 0487  | 0. 01    | -8. 25205038  | 1. 14E-25    | ** |
| siR_256018 | 21. 4118 | 0. 01    | -11. 06419036 | 5. 69E-176   | ** |
| siR_256019 | 3. 3677  | 0. 01    | -8. 39561983  | 2. 79E-28    | ** |
| siR_256020 | 1. 6661  | 0. 01    | -7. 38033118  | 2. 36E-14    | ** |
| siR_256021 | 1. 2762  | 0. 01    | -6. 99571063  | 3. 67E-11    | ** |
| siR_256022 | 1. 1344  | 0. 01    | -6. 82578563  | 5. 32E-10    | ** |
| siR_256035 | 1. 7016  | 0. 01    | -7. 41074813  | 1. 21E-14    | ** |
| siR_256078 | 3. 5804  | 0. 01    | -8. 48397698  | 5. 07E-30    | ** |
| siR_25608  | 0. 01    | 5. 706   | 9. 15633594   | 1. 68E-48    | ** |
| siR_25621  | 1. 8079  | 2. 3868  | 0. 4007628    | 0. 138652817 |    |
| siR_25627  | 32. 7912 | 7. 0112  | -2. 2255754   | 1. 38E-109   | ** |
| siR_25630  | 10. 3514 | 2. 9835  | -1. 79474822  | 2. 32E-27    | ** |
| siR_256365 | 9. 6778  | 0. 01    | -9. 9185353   | 6. 27E-80    | ** |
| siR_256366 | 7. 5508  | 0. 01    | -9. 56048567  | 1. 61E-62    | ** |
| siR_25637  | 7. 3027  | 2. 3495  | -1. 6360762   | 1. 58E-17    | ** |
| siR_256373 | 8. 2598  | 0. 01    | -9. 689963    | 2. 53E-68    | ** |
| siR_256374 | 1. 8079  | 0. 01    | -7. 49817107  | 1. 63E-15    | ** |
| siR_256479 | 9. 2524  | 0. 01    | -9. 85368377  | 1. 90E-76    | ** |
| siR_256502 | 72. 9206 | 0. 01    | -12. 83211029 | 0            | ** |
| siR_256512 | 34. 8119 | 0. 01    | -11. 76536481 | 1. 19E-285   | ** |
| siR_256513 | 1. 5598  | 0. 01    | -7. 28521726  | 1. 75E-13    | ** |

|            |          |         |               |              |    |
|------------|----------|---------|---------------|--------------|----|
| siR_256540 | 1. 8079  | 0. 01   | -7. 49817107  | 1. 63E-15    | ** |
| siR_256604 | 1. 418   | 0. 01   | -7. 14771372  | 2. 54E-12    | ** |
| siR_256667 | 0. 01    | 5. 4076 | 9. 07884463   | 5. 28E-46    | ** |
| siR_256710 | 4. 1122  | 0. 01   | -8. 68376664  | 2. 25E-34    | ** |
| siR_256711 | 9. 3942  | 0. 01   | -9. 8756265   | 1. 31E-77    | ** |
| siR_25674  | 1. 7016  | 0. 7832 | -1. 11943927  | 0. 00224762  | ** |
| siR_25676  | 3. 5804  | 2. 0139 | -0. 83012873  | 0. 000509193 |    |
| siR_25680  | 2. 7651  | 1. 6409 | -0. 75284434  | 0. 005049463 |    |
| siR_25686  | 2. 7296  | 1. 0069 | -1. 43876914  | 2. 35E-06    | ** |
| siR_25689  | 0. 01    | 2. 2376 | 7. 80580835   | 1. 81E-19    | ** |
| siR_257038 | 7. 409   | 0. 01   | -9. 53313504  | 2. 33E-61    | ** |
| siR_25704  | 0. 01    | 1. 3053 | 7. 02823761   | 1. 15E-11    | ** |
| siR_257066 | 2. 3751  | 0. 01   | -7. 89184446  | 3. 72E-20    | ** |
| siR_257221 | 1. 9852  | 0. 01   | -7. 63314056  | 5. 78E-17    | ** |
| siR_257225 | 25. 4531 | 0. 01   | -11. 31362549 | 4. 75E-209   | ** |
| siR_257231 | 58. 3861 | 0. 01   | -12. 51140959 | 0            | ** |
| siR_257291 | 3. 6159  | 0. 01   | -8. 49821097  | 2. 60E-30    | ** |
| siR_25731  | 1. 2407  | 0. 1119 | -3. 47087237  | 8. 26E-08    | ** |
| siR_25735  | 3. 7931  | 1. 7528 | -1. 11371602  | 4. 91E-06    | ** |
| siR_257461 | 1. 1698  | 0. 01   | -6. 87011809  | 2. 73E-10    | ** |
| siR_257478 | 4. 1476  | 0. 01   | -8. 69613295  | 1. 15E-34    | ** |
| siR_257484 | 1. 0635  | 0. 01   | -6. 73267622  | 2. 02E-09    | ** |
| siR_257494 | 1. 028   | 0. 01   | -6. 68369645  | 3. 95E-09    | ** |
| siR_257516 | 2. 127   | 0. 01   | -7. 73267621  | 3. 99E-18    | ** |
| siR_257523 | 1. 737   | 0. 01   | -7. 44045394  | 6. 21E-15    | ** |
| siR_257524 | 2. 836   | 0. 01   | -8. 14771372  | 6. 28E-24    | ** |
| siR_25762  | 1. 3471  | 0. 4475 | -1. 58989736  | 0. 000394142 | ** |
| siR_257635 | 3. 5095  | 0. 01   | -8. 45512172  | 1. 93E-29    | ** |
| siR_257646 | 26. 0557 | 0. 01   | -11. 34738323 | 5. 55E-214   | ** |
| siR_257655 | 2. 7651  | 0. 01   | -8. 11118786  | 2. 39E-23    | ** |
| siR_25777  | 2. 3042  | 0. 8578 | -1. 42555272  | 1. 69E-05    | ** |
| siR_257772 | 4. 8921  | 0. 01   | -8. 93431011  | 9. 31E-41    | ** |
| siR_257822 | 1. 1698  | 0. 01   | -6. 87011809  | 2. 73E-10    | ** |
| siR_257905 | 1. 3471  | 0. 01   | -7. 07371314  | 9. 66E-12    | ** |
| siR_258    | 1. 2407  | 0. 2611 | -2. 24847995  | 1. 86E-05    | ** |
| siR_258015 | 8. 8979  | 0. 01   | -9. 79732106  | 1. 52E-73    | ** |
| siR_25804  | 2. 9069  | 1. 0069 | -1. 52956103  | 3. 40E-07    | ** |
| siR_258054 | 1. 7725  | 0. 01   | -7. 46964183  | 3. 18E-15    | ** |
| siR_258073 | 2. 9423  | 0. 01   | -8. 20080054  | 8. 47E-25    | ** |
| siR_258146 | 1. 6307  | 0. 01   | -7. 34934759  | 4. 61E-14    | ** |
| siR_258198 | 1. 2407  | 0. 01   | -6. 95501051  | 7. 17E-11    | ** |
| siR_258278 | 1. 028   | 0. 01   | -6. 68369645  | 3. 95E-09    | ** |
| siR_25831  | 1. 028   | 0. 3356 | -1. 61502564  | 0. 001825058 | ** |
| siR_25842  | 1. 2762  | 0. 1119 | -3. 5115725   | 4. 57E-08    | ** |
| siR_258461 | 1. 028   | 0. 01   | -6. 68369645  | 3. 95E-09    | ** |
| siR_25851  | 3. 864   | 0. 8205 | -2. 23551986  | 2. 58E-14    | ** |
| siR_25858  | 0. 01    | 1. 0069 | 6. 6537766    | 3. 63E-09    | ** |

|            |         |        |              |             |    |
|------------|---------|--------|--------------|-------------|----|
| siR_258589 | 4.9984  | 0.01   | -8.96532255  | 1.25E-41    | ** |
| siR_258617 | 1.7725  | 0.01   | -7.46964183  | 3.18E-15    | ** |
| siR_25865  | 1.8079  | 0.9323 | -0.95544871  | 0.005637862 |    |
| siR_258714 | 1.9143  | 0.01   | -7.58067313  | 2.20E-16    | ** |
| siR_258722 | 4.0767  | 0.01   | -8.67125799  | 4.39E-34    | ** |
| siR_258731 | 4.8566  | 0.01   | -8.92380283  | 1.82E-40    | ** |
| siR_258826 | 5.1757  | 0.01   | -9.01561019  | 4.44E-43    | ** |
| siR_258836 | 2.3397  | 0.01   | -7.87017976  | 7.25E-20    | ** |
| siR_258837 | 1.1344  | 0.01   | -6.82578563  | 5.32E-10    | ** |
| siR_258877 | 2.0915  | 0.01   | -7.70839418  | 7.79E-18    | ** |
| siR_258878 | 1.9852  | 0.01   | -7.63314056  | 5.78E-17    | ** |
| siR_258943 | 5.8492  | 0.01   | -9.19209551  | 1.36E-48    | ** |
| siR_258967 | 3.1905  | 0.01   | -8.31763871  | 7.88E-27    | ** |
| siR_258971 | 3.0487  | 0.01   | -8.25205038  | 1.14E-25    | ** |
| siR_259065 | 1.3825  | 0.01   | -7.11113566  | 4.95E-12    | ** |
| siR_25911  | 9.5006  | 5.7805 | -0.71682434  | 5.70E-07    |    |
| siR_259187 | 10.3868 | 0.01   | -10.02053558 | 9.87E-86    | ** |
| siR_259227 | 1.2407  | 0.01   | -6.95501051  | 7.17E-11    | ** |
| siR_259241 | 1.737   | 0.01   | -7.44045394  | 6.21E-15    | ** |
| siR_259270 | 1.2407  | 0.01   | -6.95501051  | 7.17E-11    | ** |
| siR_259317 | 2.5169  | 0.01   | -7.97550407  | 2.57E-21    | ** |
| siR_25932  | 0.9571  | 1.5663 | 0.71061899   | 0.044456183 |    |
| siR_25934  | 0.8153  | 1.2307 | 0.59407621   | 0.12906689  |    |
| siR_259354 | 2.6587  | 0.01   | -8.05457718  | 1.77E-22    | ** |
| siR_25936  | 1.4534  | 0.8951 | -0.69931104  | 0.057935335 |    |
| siR_259400 | 2.1979  | 0.01   | -7.77998195  | 1.05E-18    | ** |
| siR_259487 | 1.418   | 0.01   | -7.14771372  | 2.54E-12    | ** |
| siR_259488 | 1.2407  | 0.01   | -6.95501051  | 7.17E-11    | ** |
| siR_259489 | 1.0989  | 0.01   | -6.7799163   | 1.04E-09    | ** |
| siR_259517 | 1.3116  | 0.01   | -7.035184    | 1.88E-11    | ** |
| siR_259557 | 2.6233  | 0.01   | -8.035239    | 3.46E-22    | ** |
| siR_25957  | 2.0206  | 0.2611 | -2.95210939  | 1.53E-10    | ** |
| siR_259809 | 1.3471  | 0.01   | -7.07371314  | 9.66E-12    | ** |
| siR_259821 | 1.1344  | 0.01   | -6.82578563  | 5.32E-10    | ** |
| siR_259854 | 4.1476  | 0.01   | -8.69613295  | 1.15E-34    | ** |
| siR_259930 | 1.0635  | 0.01   | -6.73267622  | 2.02E-09    | ** |
| siR_260065 | 1.2762  | 0.01   | -6.99571063  | 3.67E-11    | ** |
| siR_260097 | 1.1698  | 0.01   | -6.87011809  | 2.73E-10    | ** |
| siR_260122 | 1.9497  | 0.01   | -7.60710834  | 1.13E-16    | ** |
| siR_260124 | 8.1889  | 0.01   | -9.6775259   | 9.64E-68    | ** |
| siR_26016  | 5.9556  | 1.4172 | -2.07120349  | 1.71E-19    | ** |
| siR_260161 | 2.8714  | 0.01   | -8.16561052  | 3.22E-24    | ** |
| siR_260187 | 3.2259  | 0.01   | -8.33355791  | 4.04E-27    | ** |
| siR_260256 | 5.7429  | 0.01   | -9.16563566  | 1.01E-47    | ** |
| siR_260280 | 1.4534  | 0.01   | -7.18328801  | 1.30E-12    | ** |
| siR_260323 | 2.5524  | 0.01   | -7.99571063  | 1.32E-21    | ** |
| siR_260353 | 1.0989  | 0.01   | -6.7799163   | 1.04E-09    | ** |

|            |          |         |              |               |    |
|------------|----------|---------|--------------|---------------|----|
| siR_260379 | 1.0989   | 0.01    | -6.7799163   | 1.04E-09      | ** |
| siR_260398 | 1.3116   | 0.01    | -7.035184    | 1.88E-11      | ** |
| siR_260481 | 1.1344   | 0.01    | -6.82578563  | 5.32E-10      | ** |
| siR_260602 | 2.836    | 0.01    | -8.14771372  | 6.28E-24      | ** |
| siR_260607 | 1.2407   | 0.01    | -6.95501051  | 7.17E-11      | ** |
| siR_260660 | 1.418    | 0.01    | -7.14771372  | 2.54E-12      | ** |
| siR_26075  | 2.1979   | 0.4102  | -2.42172635  | 1.96E-09      | ** |
| siR_260789 | 7.7635   | 0.01    | -9.60056343  | 2.92E-64      | ** |
| siR_260815 | 602.1175 | 0.01    | -15.87775344 | 0             | ** |
| siR_260816 | 2.0561   | 0.01    | -7.68376661  | 1.52E-17      | ** |
| siR_260831 | 12.8683  | 0.01    | -10.32960581 | 4.82E-106     | ** |
| siR_260922 | 2.6233   | 0.01    | -8.035239    | 3.46E-22      | ** |
| siR_26095  | 0.01     | 1.0815  | 6.75688986   | 8.62E-10      | ** |
| siR_260962 | 1.0989   | 0.01    | -6.7799163   | 1.04E-09      | ** |
| siR_26097  | 1.5952   | 1.529   | -0.06114891  | 0.848197934   |    |
| siR_260986 | 3.6159   | 0.01    | -8.49821097  | 2.60E-30      | ** |
| siR_260989 | 27.7928  | 0.01    | -11.44049554 | 3.36E-228     | ** |
| siR_261007 | 2.8714   | 0.01    | -8.16561052  | 3.22E-24      | ** |
| siR_261067 | 3.8286   | 0.01    | -8.58067313  | 4.72E-32      | ** |
| siR_261114 | 2.1624   | 0.01    | -7.75648961  | 2.05E-18      | ** |
| siR_261179 | 1.6307   | 0.01    | -7.34934759  | 4.61E-14      | ** |
| siR_261201 | 1.3471   | 0.01    | -7.07371314  | 9.66E-12      | ** |
| siR_261230 | 1.6307   | 0.01    | -7.34934759  | 4.61E-14      | ** |
| siR_261232 | 2.3751   | 0.01    | -7.89184446  | 3.72E-20      | ** |
| siR_26130  | 0.01     | 2.536   | 7.98641094   | 5.76E-22      | ** |
| siR_261301 | 1.7725   | 0.01    | -7.46964183  | 3.18E-15      | ** |
| siR_261339 | 1.5243   | 0.01    | -7.25200305  | 3.42E-13      | ** |
| siR_261393 | 39.4203  | 0.01    | -11.94472307 | 626258336499e | ** |
| siR_26141  | 3.4741   | 1.902   | -0.86912204  | 0.000371298   |    |
| siR_261442 | 11.4149  | 0.01    | -10.15670246 | 3.80E-94      | ** |
| siR_261470 | 1.8434   | 0.01    | -7.52622535  | 8.37E-16      | ** |
| siR_261481 | 3.4741   | 0.01    | -8.44049549  | 3.76E-29      | ** |
| siR_261514 | 1.1344   | 0.01    | -6.82578563  | 5.32E-10      | ** |
| siR_261531 | 1.3471   | 0.01    | -7.07371314  | 9.66E-12      | ** |
| siR_261544 | 1.3471   | 0.01    | -7.07371314  | 9.66E-12      | ** |
| siR_26161  | 0.01     | 1.3426  | 7.06888574   | 5.63E-12      | ** |
| siR_261693 | 3.864    | 0.01    | -8.59395129  | 2.42E-32      | ** |
| siR_261697 | 4.2894   | 0.01    | -8.74463204  | 7.97E-36      | ** |
| siR_261748 | 7.8344   | 0.01    | -9.61367902  | 7.69E-65      | ** |
| siR_261904 | 1.7016   | 0.01    | -7.41074813  | 1.21E-14      | ** |
| siR_261978 | 2.6587   | 0.01    | -8.05457718  | 1.77E-22      | ** |
| siR_262    | 2.0561   | 0.5594  | -1.87795827  | 7.73E-07      | ** |
| siR_262056 | 3.3323   | 0.01    | -8.38037447  | 5.44E-28      | ** |
| siR_262114 | 1.0635   | 0.01    | -6.73267622  | 2.02E-09      | ** |
| siR_26212  | 0.01     | 15.4024 | 10.58893945  | 1.14E-129     | ** |
| siR_262138 | 1.5598   | 0.01    | -7.28521726  | 1.75E-13      | ** |
| siR_262142 | 2.0206   | 0.01    | -7.65863995  | 2.96E-17      | ** |

|            |         |        |              |             |    |
|------------|---------|--------|--------------|-------------|----|
| siR_26216  | 5.7074  | 1.9393 | -1.55729768  | 3.75E-13    | ** |
| siR_262160 | 3.2614  | 0.01   | -8.34934759  | 2.07E-27    | ** |
| siR_262200 | 71.6444 | 0.01   | -12.80663771 | 0           | ** |
| siR_262201 | 1.0635  | 0.01   | -6.73267622  | 2.02E-09    | ** |
| siR_262211 | 16.2715 | 0.01   | -10.66813151 | 6.73E-134   | ** |
| siR_26223  | 1.9852  | 0.6713 | -1.56425481  | 1.94E-05    | ** |
| siR_26232  | 4.0058  | 2.2003 | -0.86439015  | 0.000140592 |    |
| siR_26235  | 1.9497  | 1.6782 | -0.21633749  | 0.459383335 |    |
| siR_262391 | 1.0989  | 0.01   | -6.7799163   | 1.04E-09    | ** |
| siR_262397 | 34.032  | 0.01   | -11.73267618 | 2.87E-279   | ** |
| siR_262442 | 10.1741 | 0.01   | -9.9906855   | 5.44E-84    | ** |
| siR_262490 | 1.8788  | 0.01   | -7.55366769  | 4.29E-16    | ** |
| siR_262509 | 76.0402 | 0.01   | -12.89254646 | 0           | ** |
| siR_262556 | 1.9852  | 0.01   | -7.63314056  | 5.78E-17    | ** |
| siR_262593 | 2.4815  | 0.01   | -7.95506863  | 5.01E-21    | ** |
| siR_262612 | 27.5446 | 0.01   | -11.42755366 | 3.61E-226   | ** |
| siR_262613 | 12.8683 | 0.01   | -10.32960581 | 4.82E-106   | ** |
| siR_262614 | 8.6852  | 0.01   | -9.76241522  | 8.36E-72    | ** |
| siR_262628 | 3.1905  | 0.01   | -8.31763871  | 7.88E-27    | ** |
| siR_262669 | 2.9069  | 0.01   | -8.18333764  | 1.65E-24    | ** |
| siR_262677 | 9.6424  | 0.01   | -9.91324847  | 1.22E-79    | ** |
| siR_262683 | 9.2524  | 0.01   | -9.85368377  | 1.90E-76    | ** |
| siR_262713 | 7.0191  | 0.01   | -9.45514222  | 3.63E-58    | ** |
| siR_262722 | 1.2053  | 0.01   | -6.91324847  | 1.40E-10    | ** |
| siR_262760 | 3.7577  | 0.01   | -8.5537061   | 1.79E-31    | ** |
| siR_262776 | 15.5625 | 0.01   | -10.60385808 | 4.28E-128   | ** |
| siR_262823 | 2.8714  | 0.01   | -8.16561052  | 3.22E-24    | ** |
| siR_262824 | 1.1698  | 0.01   | -6.87011809  | 2.73E-10    | ** |
| siR_262954 | 1.8788  | 0.01   | -7.55366769  | 4.29E-16    | ** |
| siR_263013 | 3.1905  | 0.01   | -8.31763871  | 7.88E-27    | ** |
| siR_263015 | 7.1609  | 0.01   | -9.48399712  | 2.51E-59    | ** |
| siR_26304  | 5.282   | 0.8205 | -2.68650906  | 3.18E-23    | ** |
| siR_26305  | 1.3116  | 0.2238 | -2.55104587  | 2.11E-06    | ** |
| siR_263050 | 2.0915  | 0.01   | -7.70839418  | 7.79E-18    | ** |
| siR_263061 | 2.3042  | 0.01   | -7.84812212  | 1.41E-19    | ** |
| siR_263062 | 35.5209 | 0.01   | -11.79445241 | 1.87E-291   | ** |
| siR_263109 | 7.09    | 0.01   | -9.46964185  | 9.53E-59    | ** |
| siR_263123 | 1.5243  | 0.01   | -7.25200305  | 3.42E-13    | ** |
| siR_26315  | 2.7296  | 3.7667 | 0.46461158   | 0.032764928 |    |
| siR_263177 | 1.1344  | 0.01   | -6.82578563  | 5.32E-10    | ** |
| siR_263187 | 6.2746  | 0.01   | -9.29337967  | 4.50E-52    | ** |
| siR_263189 | 1.1344  | 0.01   | -6.82578563  | 5.32E-10    | ** |
| siR_263209 | 50.7998 | 0.01   | -12.31060687 | 0           | ** |
| siR_26323  | 1.3116  | 0.1865 | -2.81408027  | 5.73E-07    | ** |
| siR_263230 | 1.5243  | 0.01   | -7.25200305  | 3.42E-13    | ** |
| siR_263238 | 1.2053  | 0.01   | -6.91324847  | 1.40E-10    | ** |
| siR_263239 | 1.1698  | 0.01   | -6.87011809  | 2.73E-10    | ** |

|            |         |         |              |             |    |
|------------|---------|---------|--------------|-------------|----|
| siR_263334 | 4.3603  | 0.01    | -8.76828358  | 2.10E-36    | ** |
| siR_263368 | 6.9836  | 0.01    | -9.44782715  | 7.07E-58    | ** |
| siR_263395 | 2.0206  | 0.01    | -7.65863995  | 2.96E-17    | ** |
| siR_263398 | 1.0635  | 0.01    | -6.73267622  | 2.02E-09    | ** |
| siR_26345  | 7.7281  | 3.3937  | -1.18725472  | 6.03E-12    | ** |
| siR_26350  | 2.4106  | 0.7459  | -1.69233815  | 6.10E-07    | ** |
| siR_263538 | 3.0487  | 0.01    | -8.25205038  | 1.14E-25    | ** |
| siR_263614 | 2.4106  | 0.01    | -7.91324847  | 1.91E-20    | ** |
| siR_263648 | 9.5006  | 0.01    | -9.89187482  | 1.77E-78    | ** |
| siR_263687 | 3.6868  | 0.01    | -8.52622535  | 6.83E-31    | ** |
| siR_263746 | 1.0635  | 0.01    | -6.73267622  | 2.02E-09    | ** |
| siR_263754 | 3.2259  | 0.01    | -8.33355791  | 4.04E-27    | ** |
| siR_263872 | 1.3471  | 0.01    | -7.07371314  | 9.66E-12    | ** |
| siR_263876 | 1.1698  | 0.01    | -6.87011809  | 2.73E-10    | ** |
| siR_26397  | 0.01    | 54.0015 | 12.39878377  | 0           | ** |
| siR_26398  | 0.01    | 1.1561  | 6.85312238   | 2.05E-10    | ** |
| siR_264124 | 1.0635  | 0.01    | -6.73267622  | 2.02E-09    | ** |
| siR_26414  | 4.4667  | 1.3053  | -1.77482794  | 1.85E-12    | ** |
| siR_264193 | 1.3825  | 0.01    | -7.11113566  | 4.95E-12    | ** |
| siR_26428  | 1.2407  | 0.4848  | -1.35569271  | 0.002535804 | ** |
| siR_264345 | 2.8005  | 0.01    | -8.12954063  | 1.23E-23    | ** |
| siR_264350 | 60.8321 | 0.01    | -12.57061704 | 0           | ** |
| siR_264351 | 4.1122  | 0.01    | -8.68376664  | 2.25E-34    | ** |
| siR_264409 | 1.6661  | 0.01    | -7.38033118  | 2.36E-14    | ** |
| siR_264471 | 2.8005  | 0.01    | -8.12954063  | 1.23E-23    | ** |
| siR_264640 | 5.8847  | 0.01    | -9.20082503  | 6.99E-49    | ** |
| siR_264641 | 1.0989  | 0.01    | -6.7799163   | 1.04E-09    | ** |
| siR_26470  | 4.3249  | 2.2003  | -0.97496653  | 1.20E-05    | ** |
| siR_264759 | 1.737   | 0.01    | -7.44045394  | 6.21E-15    | ** |
| siR_26478  | 1.6661  | 0.2611  | -2.67380063  | 3.67E-08    | ** |
| siR_26499  | 1.2053  | 0.3729  | -1.69253158  | 0.000467353 | ** |
| siR_264998 | 4.4312  | 0.01    | -8.79155366  | 5.51E-37    | ** |
| siR_265061 | 2.4106  | 0.01    | -7.91324847  | 1.91E-20    | ** |
| siR_265083 | 1.2053  | 0.01    | -6.91324847  | 1.40E-10    | ** |
| siR_265182 | 2.3397  | 0.01    | -7.87017976  | 7.25E-20    | ** |
| siR_265198 | 1.0635  | 0.01    | -6.73267622  | 2.02E-09    | ** |
| siR_265202 | 1.3825  | 0.01    | -7.11113566  | 4.95E-12    | ** |
| siR_265218 | 2.6233  | 0.01    | -8.035239    | 3.46E-22    | ** |
| siR_265221 | 1.0989  | 0.01    | -6.7799163   | 1.04E-09    | ** |
| siR_265334 | 2.6587  | 0.01    | -8.05457718  | 1.77E-22    | ** |
| siR_265354 | 4.7148  | 0.01    | -8.88105279  | 2.63E-39    | ** |
| siR_265357 | 8.1535  | 0.01    | -9.67127563  | 1.88E-67    | ** |
| siR_265479 | 1.2407  | 0.01    | -6.95501051  | 7.17E-11    | ** |
| siR_265547 | 5.5656  | 0.01    | -9.12039339  | 2.86E-46    | ** |
| siR_26563  | 0.01    | 2.2749  | 7.82965932   | 8.83E-20    | ** |
| siR_26574  | 18.1149 | 8.8014  | -1.04137191  | 2.35E-21    | ** |
| siR_2658   | 7.1963  | 1.3053  | -2.46287391  | 2.29E-28    | ** |



|            |          |         |               |              |    |
|------------|----------|---------|---------------|--------------|----|
| siR_265865 | 1. 2762  | 0. 01   | -6. 99571063  | 3. 67E-11    | ** |
| siR_265879 | 1. 1698  | 0. 01   | -6. 87011809  | 2. 73E-10    | ** |
| siR_265931 | 1. 8079  | 0. 01   | -7. 49817107  | 1. 63E-15    | ** |
| siR_265989 | 1. 2762  | 0. 01   | -6. 99571063  | 3. 67E-11    | ** |
| siR_265990 | 5. 8847  | 0. 01   | -9. 20082503  | 6. 99E-49    | ** |
| siR_266016 | 7. 3381  | 0. 01   | -9. 51926273  | 8. 87E-61    | ** |
| siR_266017 | 1. 5952  | 0. 01   | -7. 31759351  | 8. 99E-14    | ** |
| siR_266018 | 1. 2407  | 0. 01   | -6. 95501051  | 7. 17E-11    | ** |
| siR_266059 | 1. 1698  | 0. 01   | -6. 87011809  | 2. 73E-10    | ** |
| siR_266105 | 1. 2762  | 0. 01   | -6. 99571063  | 3. 67E-11    | ** |
| siR_266116 | 1. 3116  | 0. 01   | -7. 035184    | 1. 88E-11    | ** |
| siR_266161 | 31. 905  | 0. 01   | -11. 6395668  | 7. 38E-262   | ** |
| siR_26620  | 8. 9334  | 2. 7225 | -1. 71427731  | 1. 89E-22    | ** |
| siR_266206 | 1. 418   | 0. 01   | -7. 14771372  | 2. 54E-12    | ** |
| siR_266342 | 1. 1698  | 0. 01   | -6. 87011809  | 2. 73E-10    | ** |
| siR_266378 | 2. 4106  | 0. 01   | -7. 91324847  | 1. 91E-20    | ** |
| siR_266407 | 4. 9275  | 0. 01   | -8. 94471205  | 4. 77E-41    | ** |
| siR_26641  | 0. 01    | 3. 6175 | 8. 49884921   | 5. 10E-31    | ** |
| siR_266451 | 2. 446   | 0. 01   | -7. 93428061  | 9. 77E-21    | ** |
| siR_266452 | 2. 2688  | 0. 01   | -7. 82578561  | 2. 76E-19    | ** |
| siR_26646  | 3. 3323  | 0. 8205 | -2. 02194305  | 3. 31E-11    | ** |
| siR_266533 | 5. 7783  | 0. 01   | -9. 17450131  | 5. 19E-48    | ** |
| siR_266586 | 1. 3825  | 0. 01   | -7. 11113566  | 4. 95E-12    | ** |
| siR_266621 | 3. 1905  | 0. 01   | -8. 31763871  | 7. 88E-27    | ** |
| siR_266660 | 2. 9069  | 0. 01   | -8. 18333764  | 1. 65E-24    | ** |
| siR_26671  | 4. 5021  | 3. 3937 | -0. 40773906  | 0. 039148401 |    |
| siR_26672  | 5. 282   | 0. 634  | -3. 05852956  | 2. 48E-26    | ** |
| siR_266778 | 2. 836   | 0. 01   | -8. 14771372  | 6. 28E-24    | ** |
| siR_266845 | 4. 7503  | 0. 01   | -8. 89187482  | 1. 35E-39    | ** |
| siR_266846 | 1. 418   | 0. 01   | -7. 14771372  | 2. 54E-12    | ** |
| siR_266847 | 1. 0989  | 0. 01   | -6. 7799163   | 1. 04E-09    | ** |
| siR_266876 | 2. 0206  | 0. 01   | -7. 65863995  | 2. 96E-17    | ** |
| siR_266886 | 1. 2053  | 0. 01   | -6. 91324847  | 1. 40E-10    | ** |
| siR_266902 | 1. 028   | 0. 01   | -6. 68369645  | 3. 95E-09    | ** |
| siR_266963 | 1. 4889  | 0. 01   | -7. 21810305  | 6. 67E-13    | ** |
| siR_266964 | 16. 3424 | 0. 01   | -10. 67440422 | 1. 77E-134   | ** |
| siR_266965 | 7. 0191  | 0. 01   | -9. 45514222  | 3. 63E-58    | ** |
| siR_267019 | 7. 2672  | 0. 01   | -9. 5052558   | 3. 38E-60    | ** |
| siR_267031 | 3. 0841  | 0. 01   | -8. 26870574  | 5. 85E-26    | ** |
| siR_267123 | 22. 2626 | 0. 01   | -11. 12040648 | 6. 18E-183   | ** |
| siR_26714  | 2. 3397  | 1. 0442 | -1. 16392549  | 0. 000210366 | ** |
| siR_267163 | 1. 1344  | 0. 01   | -6. 82578563  | 5. 32E-10    | ** |
| siR_267422 | 19. 6038 | 0. 01   | -10. 93691757 | 3. 57E-161   | ** |
| siR_26743  | 0. 01    | 1. 3799 | 7. 10841991   | 2. 74E-12    | ** |
| siR_267448 | 1. 3116  | 0. 01   | -7. 035184    | 1. 88E-11    | ** |
| siR_267449 | 2. 4106  | 0. 01   | -7. 91324847  | 1. 91E-20    | ** |
| siR_26750  | 5. 282   | 5. 333  | 0. 01386303   | 0. 93316882  |    |

|            |          |         |               |              |    |
|------------|----------|---------|---------------|--------------|----|
| siR_267559 | 1. 5598  | 0. 01   | -7. 28521726  | 1. 75E-13    | ** |
| siR_267630 | 2. 4815  | 0. 01   | -7. 95506863  | 5. 01E-21    | ** |
| siR_26774  | 1. 028   | 0. 634  | -0. 69728552  | 0. 113380175 |    |
| siR_267843 | 1. 5243  | 0. 01   | -7. 25200305  | 3. 42E-13    | ** |
| siR_268050 | 5. 0693  | 0. 01   | -8. 98564277  | 3. 30E-42    | ** |
| siR_268191 | 1. 0989  | 0. 01   | -6. 7799163   | 1. 04E-09    | ** |
| siR_268232 | 3. 0841  | 0. 01   | -8. 26870574  | 5. 85E-26    | ** |
| siR_26836  | 4. 6439  | 2. 3495 | -0. 98298314  | 4. 91E-06    |    |
| siR_26838  | 2. 8005  | 0. 8951 | -1. 64556365  | 1. 32E-07    | ** |
| siR_268480 | 1. 028   | 0. 01   | -6. 68369645  | 3. 95E-09    | ** |
| siR_26850  | 0. 01    | 1. 1188 | 6. 80580835   | 4. 20E-10    | ** |
| siR_26855  | 0. 01    | 1. 1561 | 6. 85312238   | 2. 05E-10    | ** |
| siR_268591 | 1. 7016  | 0. 01   | -7. 41074813  | 1. 21E-14    | ** |
| siR_26861  | 1. 5243  | 0. 3729 | -2. 03128617  | 7. 99E-06    | ** |
| siR_268625 | 1. 8079  | 0. 01   | -7. 49817107  | 1. 63E-15    | ** |
| siR_268651 | 1. 3825  | 0. 01   | -7. 11113566  | 4. 95E-12    | ** |
| siR_268711 | 5. 1402  | 0. 01   | -9. 00568068  | 8. 67E-43    | ** |
| siR_268712 | 1. 3116  | 0. 01   | -7. 035184    | 1. 88E-11    | ** |
| siR_26872  | 0. 01    | 2. 4987 | 7. 96503389   | 1. 18E-21    | ** |
| siR_26875  | 0. 01    | 1. 0815 | 6. 75688986   | 8. 62E-10    | ** |
| siR_268859 | 1. 9143  | 0. 01   | -7. 58067313  | 2. 20E-16    | ** |
| siR_268936 | 1. 028   | 0. 01   | -6. 68369645  | 3. 95E-09    | ** |
| siR_268944 | 1. 5598  | 0. 01   | -7. 28521726  | 1. 75E-13    | ** |
| siR_26897  | 3. 7577  | 3. 5429 | -0. 08491915  | 0. 679467281 |    |
| siR_268976 | 2. 2333  | 0. 01   | -7. 80303324  | 5. 38E-19    | ** |
| siR_268980 | 20. 9864 | 0. 01   | -11. 03523889 | 1. 73E-172   | ** |
| siR_269146 | 1. 2407  | 0. 01   | -6. 95501051  | 7. 17E-11    | ** |
| siR_269149 | 1. 4889  | 0. 01   | -7. 21810305  | 6. 67E-13    | ** |
| siR_26915  | 2. 8005  | 1. 6036 | -0. 80437011  | 0. 002806815 |    |
| siR_269204 | 3. 8995  | 0. 01   | -8. 60714536  | 1. 24E-32    | ** |
| siR_269289 | 5. 282   | 0. 01   | -9. 04494046  | 5. 99E-44    | ** |
| siR_26933  | 3. 2259  | 4. 065  | 0. 33355364   | 0. 10317658  |    |
| siR_269382 | 2. 3042  | 0. 01   | -7. 84812212  | 1. 41E-19    | ** |
| siR_269383 | 1. 0989  | 0. 01   | -6. 7799163   | 1. 04E-09    | ** |
| siR_269425 | 1. 6307  | 0. 01   | -7. 34934759  | 4. 61E-14    | ** |
| siR_269522 | 7. 2672  | 0. 01   | -9. 5052558   | 3. 38E-60    | ** |
| siR_269525 | 3. 6159  | 0. 01   | -8. 49821097  | 2. 60E-30    | ** |
| siR_26954  | 1. 028   | 0. 2238 | -2. 19955832  | 0. 000127871 | ** |
| siR_26958  | 7. 5154  | 1. 6409 | -2. 19536257  | 6. 05E-26    | ** |
| siR_269580 | 5. 7074  | 0. 01   | -9. 15668986  | 1. 97E-47    | ** |
| siR_26959  | 2. 3751  | 0. 2984 | -2. 99266882  | 2. 53E-12    | ** |
| siR_269650 | 1. 1698  | 0. 01   | -6. 87011809  | 2. 73E-10    | ** |
| siR_269728 | 1. 028   | 0. 01   | -6. 68369645  | 3. 95E-09    | ** |
| siR_269817 | 1. 6661  | 0. 01   | -7. 38033118  | 2. 36E-14    | ** |
| siR_26982  | 1. 9852  | 1. 5663 | -0. 3419238   | 0. 247756469 |    |
| siR_26993  | 1. 3825  | 0. 4102 | -1. 75288008  | 0. 0001191   | ** |
| siR_269965 | 3. 4386  | 0. 01   | -8. 42567749  | 7. 34E-29    | ** |

|            |           |          |               |              |    |
|------------|-----------|----------|---------------|--------------|----|
| siR_26997  | 1. 2762   | 0. 5594  | -1. 18990228  | 0. 005634656 | ** |
| siR_270129 | 1. 4534   | 0. 01    | -7. 18328801  | 1. 30E-12    | ** |
| siR_27016  | 0. 01     | 11. 1509 | 10. 12294444  | 4. 44E-94    | ** |
| siR_27022  | 0. 01     | 4. 9974  | 8. 96503389   | 1. 43E-42    | ** |
| siR_270291 | 2. 127    | 0. 01    | -7. 73267621  | 3. 99E-18    | ** |
| siR_270296 | 2. 3751   | 0. 01    | -7. 89184446  | 3. 72E-20    | ** |
| siR_270391 | 3. 155    | 0. 01    | -8. 3014962   | 1. 54E-26    | ** |
| siR_270461 | 2. 446    | 0. 01    | -7. 93428061  | 9. 77E-21    | ** |
| siR_270465 | 1. 0635   | 0. 01    | -6. 73267622  | 2. 02E-09    | ** |
| siR_270560 | 4. 1476   | 0. 01    | -8. 69613295  | 1. 15E-34    | ** |
| siR_270764 | 7. 0191   | 0. 01    | -9. 45514222  | 3. 63E-58    | ** |
| siR_270768 | 322. 7718 | 0. 01    | -14. 97822882 | 0            | ** |
| siR_270769 | 5. 0339   | 0. 01    | -8. 97553276  | 6. 43E-42    | ** |
| siR_27082  | 2. 4106   | 1. 1188  | -1. 10744012  | 0. 000299343 | ** |
| siR_270829 | 1. 5598   | 0. 01    | -7. 28521726  | 1. 75E-13    | ** |
| siR_270903 | 1. 7016   | 0. 01    | -7. 41074813  | 1. 21E-14    | ** |
| siR_27096  | 0. 01     | 1. 1934  | 6. 89893387   | 9. 98E-11    | ** |
| siR_271026 | 3. 0841   | 0. 01    | -8. 26870574  | 5. 85E-26    | ** |
| siR_271047 | 4. 573    | 0. 01    | -8. 83699711  | 3. 81E-38    | ** |
| siR_27108  | 2. 127    | 0. 8578  | -1. 31010681  | 0. 000106976 | ** |
| siR_271084 | 1. 1698   | 0. 01    | -6. 87011809  | 2. 73E-10    | ** |
| siR_27109  | 4. 9275   | 1. 902   | -1. 37333862  | 8. 10E-10    | ** |
| siR_271160 | 17. 9377  | 0. 01    | -10. 80877913 | 1. 55E-147   | ** |
| siR_271214 | 1. 028    | 0. 01    | -6. 68369645  | 3. 95E-09    | ** |
| siR_27122  | 0. 01     | 4. 5126  | 8. 81781509   | 1. 64E-38    | ** |
| siR_271299 | 1. 1698   | 0. 01    | -6. 87011809  | 2. 73E-10    | ** |
| siR_271349 | 7. 9762   | 0. 01    | -9. 63955783  | 5. 31E-66    | ** |
| siR_271350 | 1. 8434   | 0. 01    | -7. 52622535  | 8. 37E-16    | ** |
| siR_271387 | 17. 2641  | 0. 01    | -10. 75355937 | 5. 05E-142   | ** |
| siR_27158  | 1. 0635   | 0. 6713  | -0. 66379049  | 0. 122925287 | ** |
| siR_271580 | 1. 0635   | 0. 01    | -6. 73267622  | 2. 02E-09    | ** |
| siR_271594 | 1. 0635   | 0. 01    | -6. 73267622  | 2. 02E-09    | ** |
| siR_271626 | 1. 3116   | 0. 01    | -7. 035184    | 1. 88E-11    | ** |
| siR_271731 | 1. 4534   | 0. 01    | -7. 18328801  | 1. 30E-12    | ** |
| siR_271743 | 4. 7857   | 0. 01    | -8. 90258614  | 6. 91E-40    | ** |
| siR_271746 | 25. 8785  | 0. 01    | -11. 33753813 | 1. 57E-212   | ** |
| siR_27175  | 2. 0206   | 0. 4848  | -2. 05932215  | 1. 94E-07    | ** |
| siR_27178  | 16. 5551  | 5. 2584  | -1. 65457993  | 2. 26E-38    | ** |
| siR_271798 | 1. 4534   | 0. 01    | -7. 18328801  | 1. 30E-12    | ** |
| siR_27181  | 5. 3175   | 7. 9809  | 0. 58580332   | 0. 000122319 | ** |
| siR_271817 | 1. 4889   | 0. 01    | -7. 21810305  | 6. 67E-13    | ** |
| siR_27184  | 3. 6159   | 5. 2211  | 0. 52999901   | 0. 004556885 | ** |
| siR_271852 | 3. 4386   | 0. 01    | -8. 42567749  | 7. 34E-29    | ** |
| siR_271873 | 1. 2407   | 0. 01    | -6. 95501051  | 7. 17E-11    | ** |
| siR_27188  | 5. 2466   | 3. 3192  | -0. 66054724  | 0. 000552783 | ** |
| siR_271932 | 1. 3471   | 0. 01    | -7. 07371314  | 9. 66E-12    | ** |
| siR_271937 | 1. 5243   | 0. 01    | -7. 25200305  | 3. 42E-13    | ** |

|            |         |         |              |             |    |
|------------|---------|---------|--------------|-------------|----|
| siR_271951 | 1.028   | 0.01    | -6.68369645  | 3.95E-09    | ** |
| siR_271968 | 1.028   | 0.01    | -6.68369645  | 3.95E-09    | ** |
| siR_272036 | 5.3529  | 0.01    | -9.06417692  | 1.57E-44    | ** |
| siR_272063 | 2.9423  | 0.01    | -8.20080054  | 8.47E-25    | ** |
| siR_27209  | 0.01    | 2.7597  | 8.10836763   | 7.72E-24    | ** |
| siR_27210  | 0.01    | 1.3799  | 7.10841991   | 2.74E-12    | ** |
| siR_272108 | 2.6233  | 0.01    | -8.035239    | 3.46E-22    | ** |
| siR_272131 | 6.5937  | 0.01    | -9.36494442  | 1.10E-54    | ** |
| siR_27214  | 0.01    | 12.568  | 10.29553937  | 6.08E-106   | ** |
| siR_272145 | 2.4106  | 0.01    | -7.91324847  | 1.91E-20    | ** |
| siR_27215  | 0.01    | 8.2792  | 9.69334756   | 4.84E-70    | ** |
| siR_27216  | 0.01    | 1.1188  | 6.80580835   | 4.20E-10    | ** |
| siR_272198 | 2.0206  | 0.01    | -7.65863995  | 2.96E-17    | ** |
| siR_272218 | 3.4032  | 0.01    | -8.41074813  | 1.43E-28    | ** |
| siR_27225  | 0.01    | 12.4562 | 10.2826483   | 5.26E-105   | ** |
| siR_272297 | 2.7296  | 0.01    | -8.09254576  | 4.66E-23    | ** |
| siR_272301 | 4.2894  | 0.01    | -8.74463204  | 7.97E-36    | ** |
| siR_27231  | 0.01    | 1.268   | 6.98641094   | 2.37E-11    | ** |
| siR_272343 | 5.7783  | 0.01    | -9.17450131  | 5.19E-48    | ** |
| siR_272351 | 1.5598  | 0.01    | -7.28521726  | 1.75E-13    | ** |
| siR_272372 | 4.3249  | 0.01    | -8.75652296  | 4.09E-36    | ** |
| siR_27238  | 0.01    | 5.8924  | 9.20271156   | 4.62E-50    | ** |
| siR_272389 | 10.635  | 0.01    | -10.0546043  | 9.19E-88    | ** |
| siR_27239  | 0.01    | 2.0139  | 7.65384824   | 1.35E-17    | ** |
| siR_272390 | 1.6307  | 0.01    | -7.34934759  | 4.61E-14    | ** |
| siR_272393 | 3.1905  | 0.01    | -8.31763871  | 7.88E-27    | ** |
| siR_272409 | 3.0487  | 0.01    | -8.25205038  | 1.14E-25    | ** |
| siR_272412 | 2.0915  | 0.01    | -7.70839418  | 7.79E-18    | ** |
| siR_272427 | 5.991   | 0.01    | -9.22665304  | 9.42E-50    | ** |
| siR_272428 | 1.8079  | 0.01    | -7.49817107  | 1.63E-15    | ** |
| siR_27246  | 81.8539 | 9.5845  | -3.09427608  | 0           | ** |
| siR_27247  | 1.9852  | 0.634   | -1.64672961  | 9.33E-06    | ** |
| siR_27249  | 1.2053  | 0.2238  | -2.42911034  | 1.01E-05    | ** |
| siR_272500 | 1.1698  | 0.01    | -6.87011809  | 2.73E-10    | ** |
| siR_272540 | 2.3397  | 0.01    | -7.87017976  | 7.25E-20    | ** |
| siR_272617 | 2.1624  | 0.01    | -7.75648961  | 2.05E-18    | ** |
| siR_27264  | 5.9201  | 3.7667  | -0.65232041  | 0.000283861 |    |
| siR_272647 | 2.9778  | 0.01    | -8.21810305  | 4.34E-25    | ** |
| siR_272649 | 13.6837 | 0.01    | -10.41824266 | 1.02E-112   | ** |
| siR_272688 | 3.6513  | 0.01    | -8.51226639  | 1.33E-30    | ** |
| siR_272781 | 2.6942  | 0.01    | -8.07371315  | 9.10E-23    | ** |
| siR_272786 | 1.028   | 0.01    | -6.68369645  | 3.95E-09    | ** |
| siR_272787 | 1.6307  | 0.01    | -7.34934759  | 4.61E-14    | ** |
| siR_272804 | 2.9423  | 0.01    | -8.20080054  | 8.47E-25    | ** |
| siR_272809 | 1.9497  | 0.01    | -7.60710834  | 1.13E-16    | ** |
| siR_272825 | 2.9069  | 0.01    | -8.18333764  | 1.65E-24    | ** |
| siR_272830 | 2.1979  | 0.01    | -7.77998195  | 1.05E-18    | ** |

|            |           |         |               |              |    |
|------------|-----------|---------|---------------|--------------|----|
| siR_272831 | 1. 1698   | 0. 01   | -6. 87011809  | 2. 73E-10    | ** |
| siR_27288  | 4. 9984   | 2. 2749 | -1. 13566323  | 9. 66E-08    | ** |
| siR_272900 | 2. 4106   | 0. 01   | -7. 91324847  | 1. 91E-20    | ** |
| siR_272904 | 2. 4106   | 0. 01   | -7. 91324847  | 1. 91E-20    | ** |
| siR_272977 | 3. 6159   | 0. 01   | -8. 49821097  | 2. 60E-30    | ** |
| siR_272979 | 1. 2407   | 0. 01   | -6. 95501051  | 7. 17E-11    | ** |
| siR_272980 | 5. 3175   | 0. 01   | -9. 0546043   | 3. 07E-44    | ** |
| siR_272987 | 1. 0635   | 0. 01   | -6. 73267622  | 2. 02E-09    | ** |
| siR_272989 | 2. 0915   | 0. 01   | -7. 70839418  | 7. 79E-18    | ** |
| siR_272995 | 29. 2462  | 0. 01   | -11. 51403331 | 4. 27E-240   | ** |
| siR_2730   | 1. 1698   | 1. 3053 | 0. 15811953   | 0. 651380934 |    |
| siR_273195 | 1. 3116   | 0. 01   | -7. 035184    | 1. 88E-11    | ** |
| siR_273225 | 2. 0206   | 0. 01   | -7. 65863995  | 2. 96E-17    | ** |
| siR_273245 | 4. 254    | 0. 01   | -8. 73267624  | 1. 56E-35    | ** |
| siR_273249 | 7. 5863   | 0. 01   | -9. 56725266  | 8. 26E-63    | ** |
| siR_273265 | 1. 028    | 0. 01   | -6. 68369645  | 3. 95E-09    | ** |
| siR_273273 | 1. 6307   | 0. 01   | -7. 34934759  | 4. 61E-14    | ** |
| siR_273282 | 1. 7016   | 0. 01   | -7. 41074813  | 1. 21E-14    | ** |
| siR_273287 | 1. 2762   | 0. 01   | -6. 99571063  | 3. 67E-11    | ** |
| siR_273328 | 3. 2259   | 0. 01   | -8. 33355791  | 4. 04E-27    | ** |
| siR_273362 | 11. 3085  | 0. 01   | -10. 14319183 | 2. 82E-93    | ** |
| siR_273409 | 1. 3116   | 0. 01   | -7. 035184    | 1. 88E-11    | ** |
| siR_273449 | 6. 1328   | 0. 01   | -9. 26040207  | 6. 51E-51    | ** |
| siR_273454 | 4. 5376   | 0. 01   | -8. 82578561  | 7. 42E-38    | ** |
| siR_273483 | 8. 2244   | 0. 01   | -9. 68376659  | 4. 94E-68    | ** |
| siR_273540 | 1. 5243   | 0. 01   | -7. 25200305  | 3. 42E-13    | ** |
| siR_27361  | 1. 9143   | 0. 4475 | -2. 09685735  | 3. 03E-07    | ** |
| siR_273728 | 1. 2053   | 0. 01   | -6. 91324847  | 1. 40E-10    | ** |
| siR_273742 | 3. 7931   | 0. 01   | -8. 56723361  | 9. 20E-32    | ** |
| siR_27375  | 1. 418    | 0. 4102 | -1. 78945814  | 7. 68E-05    | ** |
| siR_273781 | 2. 0915   | 0. 01   | -7. 70839418  | 7. 79E-18    | ** |
| siR_273787 | 1. 3825   | 0. 01   | -7. 11113566  | 4. 95E-12    | ** |
| siR_273807 | 6. 5582   | 0. 01   | -9. 35715612  | 2. 15E-54    | ** |
| siR_273859 | 1. 6661   | 0. 01   | -7. 38033118  | 2. 36E-14    | ** |
| siR_273869 | 10. 7413  | 0. 01   | -10. 06895291 | 1. 24E-88    | ** |
| siR_273932 | 28. 8917  | 0. 01   | -11. 49643924 | 3. 40E-237   | ** |
| siR_273946 | 1. 8079   | 0. 01   | -7. 49817107  | 1. 63E-15    | ** |
| siR_273949 | 19. 4975  | 0. 01   | -10. 92907334 | 2. 65E-160   | ** |
| siR_273958 | 2. 127    | 0. 01   | -7. 73267621  | 3. 99E-18    | ** |
| siR_27398  | 5. 3175   | 1. 9393 | -1. 45521213  | 2. 60E-11    | ** |
| siR_274058 | 2. 3751   | 0. 01   | -7. 89184446  | 3. 72E-20    | ** |
| siR_274090 | 108. 2642 | 0. 01   | -13. 40226921 | 0            | ** |
| siR_274091 | 4. 8566   | 0. 01   | -8. 92380283  | 1. 82E-40    | ** |
| siR_274122 | 2. 1979   | 0. 01   | -7. 77998195  | 1. 05E-18    | ** |
| siR_27423  | 0. 01     | 1. 1188 | 6. 80580835   | 4. 20E-10    | ** |
| siR_274230 | 10. 635   | 0. 01   | -10. 0546043  | 9. 19E-88    | ** |
| siR_274372 | 23. 3615  | 0. 01   | -11. 18991721 | 6. 26E-192   | ** |

|            |           |           |               |              |    |
|------------|-----------|-----------|---------------|--------------|----|
| siR_274443 | 2. 6587   | 0. 01     | -8. 05457718  | 1. 77E-22    | ** |
| siR_274500 | 11. 1313  | 0. 01     | -10. 12040632 | 7. 96E-92    | ** |
| siR_274502 | 3. 155    | 0. 01     | -8. 3014962   | 1. 54E-26    | ** |
| siR_27454  | 0. 01     | 1. 3426   | 7. 06888574   | 5. 63E-12    | ** |
| siR_274567 | 1. 1344   | 0. 01     | -6. 82578563  | 5. 32E-10    | ** |
| siR_27459  | 3. 0841   | 1. 902    | -0. 6973323   | 0. 005579508 |    |
| siR_27461  | 31. 5505  | 27. 4483  | -0. 20094607  | 0. 005129398 |    |
| siR_27464  | 204. 9362 | 113. 1496 | -0. 85694336  | 3. 10E-162   |    |
| siR_27470  | 21. 3054  | 19. 803   | -0. 10550013  | 0. 219835178 |    |
| siR_274890 | 1. 6307   | 0. 01     | -7. 34934759  | 4. 61E-14    | ** |
| siR_274896 | 2. 7651   | 0. 01     | -8. 11118786  | 2. 39E-23    | ** |
| siR_274945 | 1. 418    | 0. 01     | -7. 14771372  | 2. 54E-12    | ** |
| siR_274958 | 3. 7931   | 0. 01     | -8. 56723361  | 9. 20E-32    | ** |
| siR_275009 | 4. 1476   | 0. 01     | -8. 69613295  | 1. 15E-34    | ** |
| siR_27501  | 1. 1344   | 0. 2611   | -2. 11925507  | 8. 17E-05    | ** |
| siR_275119 | 7. 09     | 0. 01     | -9. 46964185  | 9. 53E-59    | ** |
| siR_275184 | 1. 1698   | 0. 01     | -6. 87011809  | 2. 73E-10    | ** |
| siR_275232 | 1. 3116   | 0. 01     | -7. 035184    | 1. 88E-11    | ** |
| siR_275317 | 1. 0989   | 0. 01     | -6. 7799163   | 1. 04E-09    | ** |
| siR_275451 | 1. 6307   | 0. 01     | -7. 34934759  | 4. 61E-14    | ** |
| siR_275587 | 1. 3471   | 0. 01     | -7. 07371314  | 9. 66E-12    | ** |
| siR_275699 | 1. 6661   | 0. 01     | -7. 38033118  | 2. 36E-14    | ** |
| siR_2757   | 5. 5656   | 1. 1188   | -2. 31458507  | 8. 41E-21    | ** |
| siR_275705 | 1. 028    | 0. 01     | -6. 68369645  | 3. 95E-09    | ** |
| siR_275711 | 6. 1683   | 0. 01     | -9. 26872915  | 3. 34E-51    | ** |
| siR_275768 | 1. 4889   | 0. 01     | -7. 21810305  | 6. 67E-13    | ** |
| siR_275794 | 3. 1196   | 0. 01     | -8. 28521723  | 3. 00E-26    | ** |
| siR_275821 | 2. 1979   | 0. 01     | -7. 77998195  | 1. 05E-18    | ** |
| siR_27584  | 19. 462   | 10. 4796  | -0. 89307632  | 4. 90E-18    |    |
| siR_27586  | 8. 2598   | 3. 0581   | -1. 43347127  | 1. 91E-16    | ** |
| siR_27587  | 1. 3825   | 0. 6713   | -1. 04224993  | 0. 00950628  | ** |
| siR_27589  | 1. 7725   | 0. 5967   | -1. 57070795  | 5. 27E-05    | ** |
| siR_276040 | 2. 8714   | 0. 01     | -8. 16561052  | 3. 22E-24    | ** |
| siR_276081 | 1. 0989   | 0. 01     | -6. 7799163   | 1. 04E-09    | ** |
| siR_276120 | 1. 7016   | 0. 01     | -7. 41074813  | 1. 21E-14    | ** |
| siR_27613  | 2. 0561   | 0. 2238   | -3. 19962849  | 1. 87E-11    | ** |
| siR_276133 | 8. 3662   | 0. 01     | -9. 70842867  | 3. 42E-69    | ** |
| siR_27615  | 63. 8099  | 17. 4535  | -1. 8702639   | 4. 10E-169   | ** |
| siR_276193 | 6. 4164   | 0. 01     | -9. 3256203   | 3. 11E-53    | ** |
| siR_276210 | 1. 9497   | 0. 01     | -7. 60710834  | 1. 13E-16    | ** |
| siR_276215 | 1. 3471   | 0. 01     | -7. 07371314  | 9. 66E-12    | ** |
| siR_276322 | 2. 3751   | 0. 01     | -7. 89184446  | 3. 72E-20    | ** |
| siR_27638  | 0. 01     | 9. 5845   | 9. 90455936   | 5. 73E-81    | ** |
| siR_276402 | 1. 5952   | 0. 01     | -7. 31759351  | 8. 99E-14    | ** |
| siR_276524 | 1. 0635   | 0. 01     | -6. 73267622  | 2. 02E-09    | ** |
| siR_27655  | 2. 2333   | 1. 0815   | -1. 0461434   | 0. 000895443 | ** |
| siR_27658  | 2. 7296   | 3. 5802   | 0. 39135063   | 0. 075771081 |    |

|            |          |        |              |             |    |
|------------|----------|--------|--------------|-------------|----|
| siR_276670 | 1.028    | 0.01   | -6.68369645  | 3.95E-09    | ** |
| siR_27668  | 9.0397   | 4.438  | -1.02636523  | 3.67E-11    | ** |
| siR_276719 | 10.1032  | 0.01   | -9.98059662  | 2.07E-83    | ** |
| siR_276795 | 1.418    | 0.01   | -7.14771372  | 2.54E-12    | ** |
| siR_276798 | 1.3825   | 0.01   | -7.11113566  | 4.95E-12    | ** |
| siR_276810 | 1.2762   | 0.01   | -6.99571063  | 3.67E-11    | ** |
| siR_276830 | 18.3631  | 0.01   | -10.84259381 | 5.11E-151   | ** |
| siR_276850 | 14.0736  | 0.01   | -10.4587756  | 6.57E-116   | ** |
| siR_276855 | 23.8578  | 0.01   | -11.22024541 | 5.42E-196   | ** |
| siR_276856 | 1.1344   | 0.01   | -6.82578563  | 5.32E-10    | ** |
| siR_276858 | 20.5964  | 0.01   | -11.0081766  | 2.68E-169   | ** |
| siR_276862 | 9.5715   | 0.01   | -9.90260126  | 4.66E-79    | ** |
| siR_276895 | 7.0191   | 0.01   | -9.45514222  | 3.63E-58    | ** |
| siR_276906 | 1.3471   | 0.01   | -7.07371314  | 9.66E-12    | ** |
| siR_276907 | 1.1698   | 0.01   | -6.87011809  | 2.73E-10    | ** |
| siR_276918 | 4.7857   | 0.01   | -8.90258614  | 6.91E-40    | ** |
| siR_276920 | 1.2407   | 0.01   | -6.95501051  | 7.17E-11    | ** |
| siR_276925 | 4.8921   | 0.01   | -8.93431011  | 9.31E-41    | ** |
| siR_276926 | 1.3116   | 0.01   | -7.035184    | 1.88E-11    | ** |
| siR_27695  | 1.2053   | 0.5221 | -1.20699422  | 0.006557539 | ** |
| siR_2770   | 1.4889   | 0.7459 | -0.99719273  | 0.009388402 | ** |
| siR_277071 | 1.028    | 0.01   | -6.68369645  | 3.95E-09    | ** |
| siR_277166 | 1.1344   | 0.01   | -6.82578563  | 5.32E-10    | ** |
| siR_27722  | 1.3825   | 0.5967 | -1.2122018   | 0.003421985 | ** |
| siR_27724  | 2.5169   | 0.9696 | -1.37618629  | 1.18E-05    | ** |
| siR_277244 | 14.5345  | 0.01   | -10.50526565 | 1.11E-119   | ** |
| siR_277245 | 1.8434   | 0.01   | -7.52622535  | 8.37E-16    | ** |
| siR_27731  | 14.6408  | 2.797  | -2.38804223  | 3.60E-54    | ** |
| siR_277321 | 12.8329  | 0.01   | -10.3256315  | 9.41E-106   | ** |
| siR_277322 | 2.4106   | 0.01   | -7.91324847  | 1.91E-20    | ** |
| siR_277347 | 102.1668 | 0.01   | -13.31863816 | 0           | ** |
| siR_277423 | 4.9984   | 0.01   | -8.96532255  | 1.25E-41    | ** |
| siR_277427 | 1.1344   | 0.01   | -6.82578563  | 5.32E-10    | ** |
| siR_27744  | 1.8434   | 0.7459 | -1.30531502  | 0.000328405 | ** |
| siR_277472 | 1.5598   | 0.01   | -7.28521726  | 1.75E-13    | ** |
| siR_277556 | 11.4858  | 0.01   | -10.16563558 | 9.99E-95    | ** |
| siR_277566 | 4.5021   | 0.01   | -8.81445427  | 1.45E-37    | ** |
| siR_277690 | 1.4534   | 0.01   | -7.18328801  | 1.30E-12    | ** |
| siR_277752 | 1.3116   | 0.01   | -7.035184    | 1.88E-11    | ** |
| siR_27776  | 1.737    | 0.8205 | -1.08202252  | 0.002661787 | ** |
| siR_277768 | 1.4889   | 0.01   | -7.21810305  | 6.67E-13    | ** |
| siR_277780 | 100.9969 | 0.01   | -13.30202397 | 0           | ** |
| siR_277781 | 25.2758  | 0.01   | -11.30354086 | 1.34E-207   | ** |
| siR_277860 | 1.0989   | 0.01   | -6.7799163   | 1.04E-09    | ** |
| siR_27791  | 2.446    | 1.0069 | -1.28050399  | 4.39E-05    | ** |
| siR_277929 | 1.9143   | 0.01   | -7.58067313  | 2.20E-16    | ** |
| siR_277945 | 1.3116   | 0.01   | -7.035184    | 1.88E-11    | ** |

|            |         |        |              |             |    |
|------------|---------|--------|--------------|-------------|----|
| siR_277964 | 3.3677  | 0.01   | -8.39561983  | 2.79E-28    | ** |
| siR_278024 | 1.9497  | 0.01   | -7.60710834  | 1.13E-16    | ** |
| siR_278026 | 1.418   | 0.01   | -7.14771372  | 2.54E-12    | ** |
| siR_278033 | 1.2762  | 0.01   | -6.99571063  | 3.67E-11    | ** |
| siR_27810  | 1.8079  | 0.6713 | -1.42928533  | 0.000138786 | ** |
| siR_27812  | 2.6233  | 1.3799 | -0.92681908  | 0.001112649 |    |
| siR_278136 | 3.3323  | 0.01   | -8.38037447  | 5.44E-28    | ** |
| siR_27815  | 2.6233  | 1.3426 | -0.96635326  | 0.000735593 |    |
| siR_27818  | 0.01    | 1.0442 | 6.70625425   | 1.77E-09    | ** |
| siR_27820  | 1.1698  | 0.7459 | -0.64920776  | 0.112106036 |    |
| siR_278293 | 2.1624  | 0.01   | -7.75648961  | 2.05E-18    | ** |
| siR_278341 | 1.2053  | 0.01   | -6.91324847  | 1.40E-10    | ** |
| siR_278466 | 4.7148  | 0.01   | -8.88105279  | 2.63E-39    | ** |
| siR_278482 | 8.7207  | 0.01   | -9.76830018  | 4.28E-72    | ** |
| siR_278485 | 1.8434  | 0.01   | -7.52622535  | 8.37E-16    | ** |
| siR_278490 | 1.0989  | 0.01   | -6.7799163   | 1.04E-09    | ** |
| siR_278543 | 1.4889  | 0.01   | -7.21810305  | 6.67E-13    | ** |
| siR_278591 | 1.0989  | 0.01   | -6.7799163   | 1.04E-09    | ** |
| siR_278614 | 34.351  | 0.01   | -11.74613658 | 7.03E-282   | ** |
| siR_278623 | 3.9349  | 0.01   | -8.62018319  | 6.36E-33    | ** |
| siR_278638 | 5.282   | 0.01   | -9.04494046  | 5.99E-44    | ** |
| siR_278706 | 1.9852  | 0.01   | -7.63314056  | 5.78E-17    | ** |
| siR_278709 | 1.1698  | 0.01   | -6.87011809  | 2.73E-10    | ** |
| siR_278713 | 13.0456 | 0.01   | -10.34934754 | 1.71E-107   | ** |
| siR_278730 | 1.2053  | 0.01   | -6.91324847  | 1.40E-10    | ** |
| siR_278741 | 8.4016  | 0.01   | -9.71452026  | 1.75E-69    | ** |
| siR_278743 | 1.7725  | 0.01   | -7.46964183  | 3.18E-15    | ** |
| siR_278748 | 3.0487  | 0.01   | -8.25205038  | 1.14E-25    | ** |
| siR_278763 | 1.7725  | 0.01   | -7.46964183  | 3.18E-15    | ** |
| siR_278822 | 6.3101  | 0.01   | -9.30151909  | 2.30E-52    | ** |
| siR_278828 | 66.6814 | 0.01   | -12.70306827 | 0           | ** |
| siR_278840 | 1.0635  | 0.01   | -6.73267622  | 2.02E-09    | ** |
| siR_278865 | 8.1889  | 0.01   | -9.6775259   | 9.64E-68    | ** |
| siR_278891 | 1.7725  | 0.01   | -7.46964183  | 3.18E-15    | ** |
| siR_278905 | 27.261  | 0.01   | -11.41262277 | 7.57E-224   | ** |
| siR_278921 | 3.9349  | 0.01   | -8.62018319  | 6.36E-33    | ** |
| siR_278987 | 1.0635  | 0.01   | -6.73267622  | 2.02E-09    | ** |
| siR_278995 | 7.0191  | 0.01   | -9.45514222  | 3.63E-58    | ** |
| siR_279034 | 11.0604 | 0.01   | -10.1111879  | 3.03E-91    | ** |
| siR_279064 | 1.3825  | 0.01   | -7.11113566  | 4.95E-12    | ** |
| siR_279088 | 2.8005  | 0.01   | -8.12954063  | 1.23E-23    | ** |
| siR_279090 | 2.127   | 0.01   | -7.73267621  | 3.99E-18    | ** |
| siR_279122 | 3.8286  | 0.01   | -8.58067313  | 4.72E-32    | ** |
| siR_279194 | 11.1313 | 0.01   | -10.12040632 | 7.96E-92    | ** |
| siR_2792   | 0.01    | 1.3426 | 7.06888574   | 5.63E-12    | ** |
| siR_279222 | 4.7148  | 0.01   | -8.88105279  | 2.63E-39    | ** |
| siR_279334 | 1.5243  | 0.01   | -7.25200305  | 3.42E-13    | ** |



|            |         |         |              |             |    |
|------------|---------|---------|--------------|-------------|----|
| siR_279346 | 2.6942  | 0.01    | -8.07371315  | 9.10E-23    | ** |
| siR_27944  | 0.01    | 2.1258  | 7.73186206   | 1.57E-18    | ** |
| siR_279608 | 1.2762  | 0.01    | -6.99571063  | 3.67E-11    | ** |
| siR_279697 | 2.3042  | 0.01    | -7.84812212  | 1.41E-19    | ** |
| siR_2797   | 1.028   | 1.1934  | 0.21523742   | 0.561266488 |    |
| siR_279751 | 6.3101  | 0.01    | -9.30151909  | 2.30E-52    | ** |
| siR_279781 | 5.7429  | 0.01    | -9.16563566  | 1.01E-47    | ** |
| siR_279850 | 1.2762  | 0.01    | -6.99571063  | 3.67E-11    | ** |
| siR_279864 | 3.5804  | 0.01    | -8.48397698  | 5.07E-30    | ** |
| siR_27988  | 0.01    | 3.6175  | 8.49884921   | 5.10E-31    | ** |
| siR_28001  | 17.016  | 7.6079  | -1.16132175  | 9.96E-24    | ** |
| siR_28006  | 0.01    | 10.9644 | 10.09861115  | 1.61E-92    | ** |
| siR_280120 | 1.2762  | 0.01    | -6.99571063  | 3.67E-11    | ** |
| siR_28015  | 5.0693  | 1.9393  | -1.38625055  | 3.48E-10    | ** |
| siR_28025  | 0.01    | 8.4657  | 9.72548555   | 1.33E-71    | ** |
| siR_280292 | 12.3011 | 0.01    | -10.26457167 | 2.12E-101   | ** |
| siR_28032  | 1.2407  | 0.4475  | -1.47119473  | 0.001326969 | ** |
| siR_28041  | 5.282   | 1.9393  | -1.4455483   | 3.78E-11    | ** |
| siR_28042  | 5.6365  | 1.0442  | -2.43240153  | 3.12E-22    | ** |
| siR_280464 | 2.127   | 0.01    | -7.73267621  | 3.99E-18    | ** |
| siR_280466 | 1.5598  | 0.01    | -7.28521726  | 1.75E-13    | ** |
| siR_280547 | 1.7725  | 0.01    | -7.46964183  | 3.18E-15    | ** |
| siR_280586 | 1.1698  | 0.01    | -6.87011809  | 2.73E-10    | ** |
| siR_280588 | 3.9704  | 0.01    | -8.63314056  | 3.26E-33    | ** |
| siR_280658 | 4.0058  | 0.01    | -8.64594661  | 1.67E-33    | ** |
| siR_28072  | 0.709   | 1.0815  | 0.60917613   | 0.145996817 |    |
| siR_28073  | 1.8788  | 1.1561  | -0.70054531  | 0.030426223 |    |
| siR_28086  | 2.8005  | 0.3356  | -3.06086981  | 1.36E-14    | ** |
| siR_28087  | 77.7063 | 8.9878  | -3.11199164  | 0           | ** |
| siR_280881 | 1.0635  | 0.01    | -6.73267622  | 2.02E-09    | ** |
| siR_280883 | 1.418   | 0.01    | -7.14771372  | 2.54E-12    | ** |
| siR_28091  | 2.9069  | 0.1865  | -3.96223391  | 1.90E-18    | ** |
| siR_28096  | 2.6233  | 0.1865  | -3.81413527  | 2.45E-16    | ** |
| siR_281037 | 1.2053  | 0.01    | -6.91324847  | 1.40E-10    | ** |
| siR_28107  | 14.8535 | 4.2888  | -1.79215697  | 1.69E-38    | ** |
| siR_28109  | 1.3825  | 0.1492  | -3.21196004  | 4.21E-08    | ** |
| siR_281197 | 1.1344  | 0.01    | -6.82578563  | 5.32E-10    | ** |
| siR_28120  | 1.2407  | 0.3356  | -1.88633969  | 0.000130463 | ** |
| siR_281256 | 2.6587  | 0.01    | -8.05457718  | 1.77E-22    | ** |
| siR_28128  | 3.0132  | 2.3122  | -0.38203024  | 0.112937416 |    |
| siR_28134  | 1.1344  | 0.1865  | -2.6046819   | 8.62E-06    | ** |
| siR_281342 | 2.3042  | 0.01    | -7.84812212  | 1.41E-19    | ** |
| siR_281343 | 6.8773  | 0.01    | -9.42569848  | 5.25E-57    | ** |
| siR_28135  | 13.1874 | 13.0156 | -0.01891833  | 0.861393865 |    |
| siR_281397 | 4.3603  | 0.01    | -8.76828358  | 2.10E-36    | ** |
| siR_28140  | 22.0144 | 20.5116 | -0.10200749  | 0.227549529 |    |
| siR_281434 | 1.1344  | 0.01    | -6.82578563  | 5.32E-10    | ** |

|            |         |         |             |             |    |
|------------|---------|---------|-------------|-------------|----|
| siR_28144  | 3.2968  | 4.1396  | 0.328425    | 0.105075002 |    |
| siR_281441 | 1.2407  | 0.01    | -6.95501051 | 7.17E-11    | ** |
| siR_281448 | 2.836   | 0.01    | -8.14771372 | 6.28E-24    | ** |
| siR_281453 | 2.1979  | 0.01    | -7.77998195 | 1.05E-18    | ** |
| siR_281466 | 2.8714  | 0.01    | -8.16561052 | 3.22E-24    | ** |
| siR_281477 | 3.864   | 0.01    | -8.59395129 | 2.42E-32    | ** |
| siR_28148  | 4.2894  | 2.9462  | -0.54192049 | 0.008955231 |    |
| siR_28151  | 81.8539 | 40.2401 | -1.02441727 | 3.10E-88    | ** |
| siR_281518 | 1.9143  | 0.01    | -7.58067313 | 2.20E-16    | ** |
| siR_281524 | 1.8434  | 0.01    | -7.52622535 | 8.37E-16    | ** |
| siR_281582 | 7.6217  | 0.01    | -9.57396906 | 4.23E-63    | ** |
| siR_281590 | 2.5169  | 0.01    | -7.97550407 | 2.57E-21    | ** |
| siR_281596 | 3.4032  | 0.01    | -8.41074813 | 1.43E-28    | ** |
| siR_281619 | 1.2762  | 0.01    | -6.99571063 | 3.67E-11    | ** |
| siR_281643 | 3.7931  | 0.01    | -8.56723361 | 9.20E-32    | ** |
| siR_28165  | 6.8773  | 1.0815  | -2.66880861 | 1.34E-29    | ** |
| siR_28173  | 3.5804  | 2.8716  | -0.31826597 | 0.145213737 |    |
| siR_2818   | 2.9423  | 0.8578  | -1.77823113 | 1.11E-08    | ** |
| siR_2819   | 48.6373 | 10.1439 | -2.26145071 | 7.81E-165   | ** |
| siR_281954 | 6.9127  | 0.01    | -9.43310546 | 2.69E-57    | ** |
| siR_281966 | 4.6439  | 0.01    | -8.85919308 | 1.00E-38    | ** |
| siR_2820   | 1.0989  | 0.5594  | -0.97410795 | 0.02925074  |    |
| siR_28200  | 15.1371 | 2.8343  | -2.41702446 | 9.94E-57    | ** |
| siR_282004 | 2.8005  | 0.01    | -8.12954063 | 1.23E-23    | ** |
| siR_28202  | 1.6307  | 0.4848  | -1.75002979 | 2.87E-05    | ** |
| siR_282033 | 1.2407  | 0.01    | -6.95501051 | 7.17E-11    | ** |
| siR_282098 | 2.7296  | 0.01    | -8.09254576 | 4.66E-23    | ** |
| siR_282136 | 3.2968  | 0.01    | -8.36492254 | 1.06E-27    | ** |
| siR_282147 | 1.418   | 0.01    | -7.14771372 | 2.54E-12    | ** |
| siR_282313 | 2.0206  | 0.01    | -7.65863995 | 2.96E-17    | ** |
| siR_282367 | 2.3042  | 0.01    | -7.84812212 | 1.41E-19    | ** |
| siR_282371 | 2.9778  | 0.01    | -8.21810305 | 4.34E-25    | ** |
| siR_28240  | 0.01    | 18.274  | 10.83557675 | 1.05E-153   | ** |
| siR_282450 | 7.8699  | 0.01    | -9.62020147 | 3.94E-65    | ** |
| siR_282492 | 4.5021  | 0.01    | -8.81445427 | 1.45E-37    | ** |
| siR_2826   | 13.3292 | 4.1023  | -1.70008529 | 2.28E-32    | ** |
| siR_282743 | 7.409   | 0.01    | -9.53313504 | 2.33E-61    | ** |
| siR_2829   | 12.5493 | 3.9904  | -1.65300162 | 1.94E-29    | ** |
| siR_282910 | 1.2053  | 0.01    | -6.91324847 | 1.40E-10    | ** |
| siR_282931 | 1.418   | 0.01    | -7.14771372 | 2.54E-12    | ** |
| siR_28301  | 1.6661  | 1.268   | -0.39392025 | 0.2272645   |    |
| siR_283027 | 1.4889  | 0.01    | -7.21810305 | 6.67E-13    | ** |
| siR_283114 | 1.4889  | 0.01    | -7.21810305 | 6.67E-13    | ** |
| siR_28313  | 0.01    | 3.3564  | 8.39077085  | 7.81E-29    | ** |
| siR_28316  | 0.01    | 4.8109  | 8.910163    | 5.22E-41    | ** |
| siR_28323  | 0.01    | 2.5733  | 8.00747585  | 2.81E-22    | ** |
| siR_283263 | 1.0635  | 0.01    | -6.73267622 | 2.02E-09    | ** |

|            |          |         |              |             |    |
|------------|----------|---------|--------------|-------------|----|
| siR_283315 | 5.6011   | 0.01    | -9.12956637  | 1.46E-46    | ** |
| siR_2834   | 328.3375 | 83.5756 | -1.97402582  | 0           | ** |
| siR_283412 | 1.0989   | 0.01    | -6.7799163   | 1.04E-09    | ** |
| siR_2835   | 6.381    | 2.8716  | -1.15192773  | 1.07E-09    | ** |
| siR_28354  | 0.01     | 3.3192  | 8.37469175   | 1.60E-28    | ** |
| siR_283554 | 2.5878   | 0.01    | -8.0155823   | 6.75E-22    | ** |
| siR_28356  | 0.01     | 1.6409  | 7.35834351   | 1.79E-14    | ** |
| siR_283572 | 1.0635   | 0.01    | -6.73267622  | 2.02E-09    | ** |
| siR_283579 | 1.1698   | 0.01    | -6.87011809  | 2.73E-10    | ** |
| siR_28358  | 104.7546 | 55.0085 | -0.92928713  | 6.78E-96    |    |
| siR_28364  | 0.01     | 17.64   | 10.78463485  | 2.13E-148   | ** |
| siR_283648 | 4.573    | 0.01    | -8.83699711  | 3.81E-38    | ** |
| siR_283660 | 1.6307   | 0.01    | -7.34934759  | 4.61E-14    | ** |
| siR_28369  | 0.01     | 10.9644 | 10.09861115  | 1.61E-92    | ** |
| siR_28376  | 1.3471   | 1.7155  | 0.34877217   | 0.270550826 |    |
| siR_283766 | 1.7725   | 0.01    | -7.46964183  | 3.18E-15    | ** |
| siR_283816 | 3.3323   | 0.01    | -8.38037447  | 5.44E-28    | ** |
| siR_283832 | 97.4165  | 0.01    | -13.24995064 | 0           | ** |
| siR_283838 | 17.016   | 0.01    | -10.73267618 | 5.43E-140   | ** |
| siR_283947 | 2.5524   | 0.01    | -7.99571063  | 1.32E-21    | ** |
| siR_284016 | 1.0989   | 0.01    | -6.7799163   | 1.04E-09    | ** |
| siR_28402  | 56.2591  | 10.1439 | -2.47147404  | 1.82E-211   | ** |
| siR_284037 | 2.1624   | 0.01    | -7.75648961  | 2.05E-18    | ** |
| siR_284060 | 2.6587   | 0.01    | -8.05457718  | 1.77E-22    | ** |
| siR_284094 | 1.2762   | 0.01    | -6.99571063  | 3.67E-11    | ** |
| siR_28413  | 13.3646  | 8.4284  | -0.66508597  | 2.76E-08    |    |
| siR_28416  | 4.2185   | 3.5056  | -0.26706871  | 0.180421805 |    |
| siR_284182 | 5.2466   | 0.01    | -9.03523897  | 1.17E-43    | ** |
| siR_284196 | 2.3397   | 0.01    | -7.87017976  | 7.25E-20    | ** |
| siR_284273 | 2.9423   | 0.01    | -8.20080054  | 8.47E-25    | ** |
| siR_284275 | 1.028    | 0.01    | -6.68369645  | 3.95E-09    | ** |
| siR_2843   | 5.5656   | 1.0069  | -2.46661682  | 2.64E-22    | ** |
| siR_28431  | 0.01     | 59.7075 | 12.54369645  | 0           | ** |
| siR_28432  | 0.01     | 2.3122  | 7.85312238   | 4.30E-20    | ** |
| siR_284322 | 16.5906  | 0.01    | -10.69615024 | 1.65E-136   | ** |
| siR_284335 | 3.6868   | 0.01    | -8.52622535  | 6.83E-31    | ** |
| siR_284354 | 1.0989   | 0.01    | -6.7799163   | 1.04E-09    | ** |
| siR_284363 | 1.418    | 0.01    | -7.14771372  | 2.54E-12    | ** |
| siR_28438  | 0.01     | 2.536   | 7.98641094   | 5.76E-22    | ** |
| siR_284490 | 1.1698   | 0.01    | -6.87011809  | 2.73E-10    | ** |
| siR_284548 | 1.9143   | 0.01    | -7.58067313  | 2.20E-16    | ** |
| siR_284561 | 4.1122   | 0.01    | -8.68376664  | 2.25E-34    | ** |
| siR_284568 | 1.3471   | 0.01    | -7.07371314  | 9.66E-12    | ** |
| siR_2846   | 2.6233   | 0.5594  | -2.22943064  | 4.13E-10    | ** |
| siR_28461  | 3.2968   | 1.9393  | -0.76553037  | 0.001873871 |    |
| siR_28463  | 10.0323  | 3.2073  | -1.64522119  | 1.07E-23    | ** |
| siR_284636 | 1.2053   | 0.01    | -6.91324847  | 1.40E-10    | ** |

|            |         |         |              |             |    |
|------------|---------|---------|--------------|-------------|----|
| siR_284688 | 1.028   | 0.01    | -6.68369645  | 3.95E-09    | ** |
| siR_2847   | 1.3116  | 0.5967  | -1.13625012  | 0.006797934 | ** |
| siR_28472  | 1.0635  | 0.4848  | -1.13335843  | 0.015328041 | *  |
| siR_2848   | 1.0635  | 0.2238  | -2.24853809  | 7.77E-05    | ** |
| siR_284804 | 3.7931  | 0.01    | -8.56723361  | 9.20E-32    | ** |
| siR_284806 | 3.2614  | 0.01    | -8.34934759  | 2.07E-27    | ** |
| siR_284836 | 1.3825  | 0.01    | -7.11113566  | 4.95E-12    | ** |
| siR_284837 | 1.0635  | 0.01    | -6.73267622  | 2.02E-09    | ** |
| siR_28485  | 1.7725  | 0.4848  | -1.87032402  | 4.91E-06    | ** |
| siR_284859 | 2.8005  | 0.01    | -8.12954063  | 1.23E-23    | ** |
| siR_28486  | 1.5952  | 0.4848  | -1.71827571  | 4.42E-05    | ** |
| siR_284889 | 5.1048  | 0.01    | -8.99571063  | 1.69E-42    | ** |
| siR_28494  | 0.01    | 4.2142  | 8.71911497   | 5.16E-36    | ** |
| siR_28496  | 0.01    | 3.9904  | 8.64038956   | 3.85E-34    | ** |
| siR_28501  | 31.0896 | 12.3443 | -1.33258703  | 1.10E-51    | ** |
| siR_285013 | 1.9497  | 0.01    | -7.60710834  | 1.13E-16    | ** |
| siR_285033 | 1.7725  | 0.01    | -7.46964183  | 3.18E-15    | ** |
| siR_28516  | 12.9747 | 5.1466  | -1.33400962  | 1.49E-22    | ** |
| siR_28518  | 8.3662  | 2.9089  | -1.52409879  | 4.47E-18    | ** |
| siR_285245 | 1.7725  | 0.01    | -7.46964183  | 3.18E-15    | ** |
| siR_285362 | 4.7503  | 0.01    | -8.89187482  | 1.35E-39    | ** |
| siR_285378 | 5.3884  | 0.01    | -9.07371312  | 8.07E-45    | ** |
| siR_285635 | 11.6985 | 0.01    | -10.19210792 | 1.81E-96    | ** |
| siR_285668 | 1.2407  | 0.01    | -6.95501051  | 7.17E-11    | ** |
| siR_285682 | 1.2407  | 0.01    | -6.95501051  | 7.17E-11    | ** |
| siR_28572  | 0.01    | 1.1934  | 6.89893387   | 9.98E-11    | ** |
| siR_285721 | 5.3529  | 0.01    | -9.06417692  | 1.57E-44    | ** |
| siR_28573  | 0.01    | 7.1231  | 9.47636143   | 2.30E-60    | ** |
| siR_285732 | 10.0323 | 0.01    | -9.97043668  | 7.87E-83    | ** |
| siR_285750 | 7.1963  | 0.01    | -9.49111151  | 1.28E-59    | ** |
| siR_28581  | 0.01    | 5.333   | 9.05880352   | 2.22E-45    | ** |
| siR_285959 | 2.0561  | 0.01    | -7.68376661  | 1.52E-17    | ** |
| siR_285969 | 1.0989  | 0.01    | -6.7799163   | 1.04E-09    | ** |
| siR_286005 | 6.6291  | 0.01    | -9.37266921  | 5.64E-55    | ** |
| siR_286010 | 8.3662  | 0.01    | -9.70842867  | 3.42E-69    | ** |
| siR_286019 | 1.3825  | 0.01    | -7.11113566  | 4.95E-12    | ** |
| siR_286119 | 1.0989  | 0.01    | -6.7799163   | 1.04E-09    | ** |
| siR_286384 | 1.418   | 0.01    | -7.14771372  | 2.54E-12    | ** |
| siR_286389 | 2.4106  | 0.01    | -7.91324847  | 1.91E-20    | ** |
| siR_286394 | 5.1048  | 0.01    | -8.99571063  | 1.69E-42    | ** |
| siR_286401 | 2.9069  | 0.01    | -8.18333764  | 1.65E-24    | ** |
| siR_286411 | 1.1698  | 0.01    | -6.87011809  | 2.73E-10    | ** |
| siR_286469 | 5.8138  | 0.01    | -9.18333764  | 2.66E-48    | ** |
| siR_286543 | 1.0989  | 0.01    | -6.7799163   | 1.04E-09    | ** |
| siR_28659  | 0.8508  | 1.3053  | 0.61748948   | 0.105489325 |    |
| siR_286755 | 1.4889  | 0.01    | -7.21810305  | 6.67E-13    | ** |
| siR_28685  | 0.01    | 1.3426  | 7.06888574   | 5.63E-12    | ** |

|            |         |         |              |             |    |
|------------|---------|---------|--------------|-------------|----|
| siR_286850 | 1.0989  | 0.01    | -6.7799163   | 1.04E-09    | ** |
| siR_28686  | 1.1344  | 1.4172  | 0.32111393   | 0.354484853 |    |
| siR_286924 | 11.8757 | 0.01    | -10.21379688 | 6.42E-98    | ** |
| siR_287035 | 6.381   | 0.01    | -9.31763871  | 6.06E-53    | ** |
| siR_28704  | 0.01    | 2.0885  | 7.70632333   | 3.21E-18    | ** |
| siR_287089 | 5.1048  | 0.01    | -8.99571063  | 1.69E-42    | ** |
| siR_28716  | 2.8005  | 1.0815  | -1.37265076  | 3.91E-06    | ** |
| siR_28717  | 5.8492  | 8.9878  | 0.6197287    | 1.80E-05    |    |
| siR_287257 | 2.2688  | 0.01    | -7.82578561  | 2.76E-19    | ** |
| siR_28731  | 5.2466  | 2.5733  | -1.02776314  | 4.66E-07    | ** |
| siR_287318 | 2.0915  | 0.01    | -7.70839418  | 7.79E-18    | ** |
| siR_28736  | 1.0989  | 0.2238  | -2.29577817  | 4.70E-05    | ** |
| siR_28753  | 2.6587  | 2.0139  | -0.40072895  | 0.119760642 |    |
| siR_28757  | 39.6685 | 26.2549 | -0.59540714  | 3.90E-18    |    |
| siR_287612 | 1.2407  | 0.01    | -6.95501051  | 7.17E-11    | ** |
| siR_28763  | 1.028   | 1.3799  | 0.42472346   | 0.235869389 |    |
| siR_28791  | 9.2879  | 3.0954  | -1.58522659  | 5.50E-21    | ** |
| siR_287957 | 5.2111  | 0.01    | -9.02544416  | 2.28E-43    | ** |
| siR_28801  | 0.01    | 1.1934  | 6.89893387   | 9.98E-11    | ** |
| siR_288087 | 41.5119 | 0.01    | -12.01930913 | 0           | ** |
| siR_288088 | 5.8492  | 0.01    | -9.19209551  | 1.36E-48    | ** |
| siR_28814  | 2.6233  | 1.0069  | -1.38146239  | 7.21E-06    | ** |
| siR_288147 | 5.1402  | 0.01    | -9.00568068  | 8.67E-43    | ** |
| siR_288169 | 30.7351 | 0.01    | -11.58567149 | 2.78E-252   | ** |
| siR_28819  | 6.4873  | 5.072   | -0.35506341  | 0.029365635 |    |
| siR_288206 | 6.1683  | 0.01    | -9.26872915  | 3.34E-51    | ** |
| siR_28822  | 1.1344  | 0.5594  | -1.01997728  | 0.02136103  | *  |
| siR_288299 | 1.418   | 0.01    | -7.14771372  | 2.54E-12    | ** |
| siR_28836  | 1.0989  | 0.3729  | -1.5591994   | 0.001653799 | ** |
| siR_288376 | 9.7487  | 0.01    | -9.92906603  | 1.65E-80    | ** |
| siR_28840  | 13.5064 | 2.9835  | -2.17856551  | 5.66E-45    | ** |
| siR_28842  | 3.864   | 0.8951  | -2.10997432  | 2.03E-13    | ** |
| siR_288431 | 1.2407  | 0.01    | -6.95501051  | 7.17E-11    | ** |
| siR_288452 | 4.4312  | 0.01    | -8.79155366  | 5.51E-37    | ** |
| siR_28873  | 1.418   | 1.529   | 0.10873087   | 0.733407941 |    |
| siR_288735 | 1.5598  | 0.01    | -7.28521726  | 1.75E-13    | ** |
| siR_288801 | 1.028   | 0.01    | -6.68369645  | 3.95E-09    | ** |
| siR_28884  | 4.0413  | 1.8274  | -1.14502699  | 1.41E-06    | ** |
| siR_28889  | 1.4534  | 1.3053  | -0.15505039  | 0.645288754 |    |
| siR_2889   | 1.0635  | 0.4475  | -1.24886045  | 0.008857046 | ** |
| siR_288939 | 1.6661  | 0.01    | -7.38033118  | 2.36E-14    | ** |
| siR_288958 | 1.0635  | 0.01    | -6.73267622  | 2.02E-09    | ** |
| siR_28898  | 1.0989  | 0.4848  | -1.1805985   | 0.010852128 | *  |
| siR_289047 | 25.2758 | 0.01    | -11.30354086 | 1.34E-207   | ** |
| siR_289060 | 1.2762  | 0.01    | -6.99571063  | 3.67E-11    | ** |
| siR_289099 | 2.5524  | 0.01    | -7.99571063  | 1.32E-21    | ** |
| siR_289200 | 1.418   | 0.01    | -7.14771372  | 2.54E-12    | ** |

|            |         |        |              |               |    |
|------------|---------|--------|--------------|---------------|----|
| siR_289217 | 7.9762  | 0.01   | -9.63955783  | 5.31E-66      | ** |
| siR_28932  | 1.4889  | 0.8951 | -0.73412609  | 0.045190204   |    |
| siR_289338 | 1.6307  | 0.01   | -7.34934759  | 4.61E-14      | ** |
| siR_28934  | 6.4519  | 0.9323 | -2.79085791  | 3.74E-29      | ** |
| siR_28937  | 0.01    | 1.4545 | 7.18437949   | 6.51E-13      | ** |
| siR_289459 | 2.446   | 0.01   | -7.93428061  | 9.77E-21      | ** |
| siR_289465 | 8.2598  | 0.01   | -9.689963    | 2.53E-68      | ** |
| siR_28947  | 0.01    | 1.0069 | 6.6537766    | 3.63E-09      | ** |
| siR_289495 | 1.0989  | 0.01   | -6.7799163   | 1.04E-09      | ** |
| siR_289522 | 2.7651  | 0.01   | -8.11118786  | 2.39E-23      | ** |
| siR_289583 | 22.8652 | 0.01   | -11.15893794 | 7.22E-188     | ** |
| siR_289588 | 27.2256 | 0.01   | -11.41074798 | 1.48E-223     | ** |
| siR_289589 | 1.5952  | 0.01   | -7.31759351  | 8.99E-14      | ** |
| siR_289590 | 1.3825  | 0.01   | -7.11113566  | 4.95E-12      | ** |
| siR_289602 | 71.1126 | 0.01   | -12.79588904 | 0             | ** |
| siR_289631 | 1.6661  | 0.01   | -7.38033118  | 2.36E-14      | ** |
| siR_28974  | 3.7577  | 1.6036 | -1.22853557  | 8.84E-07      | ** |
| siR_289771 | 1.3471  | 0.01   | -7.07371314  | 9.66E-12      | ** |
| siR_28983  | 0.01    | 1.9766 | 7.62687714   | 2.78E-17      | ** |
| siR_289837 | 9.217   | 0.01   | -9.84815347  | 3.71E-76      | ** |
| siR_289840 | 1.0635  | 0.01   | -6.73267622  | 2.02E-09      | ** |
| siR_289865 | 6.0265  | 0.01   | -9.23517658  | 4.83E-50      | ** |
| siR_289913 | 3.0132  | 0.01   | -8.23515263  | 2.23E-25      | ** |
| siR_28997  | 9.6424  | 2.163  | -2.15635861  | 3.65E-32      | ** |
| siR_290109 | 2.7651  | 0.01   | -8.11118786  | 2.39E-23      | ** |
| siR_29011  | 1.028   | 0.7832 | -0.39238759  | 0.347659208   |    |
| siR_29012  | 4.963   | 1.3053 | -1.92683103  | 3.93E-15      | ** |
| siR_29024  | 1.2407  | 1.0815 | -0.19812065  | 0.590050383   |    |
| siR_29033  | 11.1667 | 5.5568 | -1.00687668  | 4.43E-13      | ** |
| siR_290366 | 39.1367 | 0.01   | -11.93430665 | 303020007597e | ** |
| siR_290367 | 1.0635  | 0.01   | -6.73267622  | 2.02E-09      | ** |
| siR_290564 | 1.5952  | 0.01   | -7.31759351  | 8.99E-14      | ** |
| siR_290693 | 1.3825  | 0.01   | -7.11113566  | 4.95E-12      | ** |
| siR_29071  | 1.8788  | 0.4848 | -1.95434989  | 1.25E-06      | ** |
| siR_290742 | 1.7725  | 0.01   | -7.46964183  | 3.18E-15      | ** |
| siR_290837 | 1.3471  | 0.01   | -7.07371314  | 9.66E-12      | ** |
| siR_29085  | 3.5804  | 2.4241 | -0.56267156  | 0.01356284    |    |
| siR_29086  | 2.8714  | 3.17   | 0.14272852   | 0.52379838    |    |
| siR_29089  | 0.01    | 7.9809 | 9.64040764   | 1.52E-67      | ** |
| siR_291145 | 1.6661  | 0.01   | -7.38033118  | 2.36E-14      | ** |
| siR_291149 | 2.2333  | 0.01   | -7.80303324  | 5.38E-19      | ** |
| siR_291151 | 3.864   | 0.01   | -8.59395129  | 2.42E-32      | ** |
| siR_291168 | 20.171  | 0.01   | -10.97806701 | 8.14E-166     | ** |
| siR_29118  | 1.3471  | 4.3634 | 1.69559578   | 1.19E-11      | ** |
| siR_29121  | 3.8286  | 3.3937 | -0.1739579   | 0.398892457   |    |
| siR_291216 | 1.5243  | 0.01   | -7.25200305  | 3.42E-13      | ** |
| siR_291238 | 1.4889  | 0.01   | -7.21810305  | 6.67E-13      | ** |

|            |         |        |              |             |    |
|------------|---------|--------|--------------|-------------|----|
| siR_291304 | 1.4534  | 0.01   | -7.18328801  | 1.30E-12    | ** |
| siR_291355 | 1.2407  | 0.01   | -6.95501051  | 7.17E-11    | ** |
| siR_291376 | 19.5329 | 0.01   | -10.93169058 | 1.36E-160   | ** |
| siR_291399 | 2.6587  | 0.01   | -8.05457718  | 1.77E-22    | ** |
| siR_291401 | 1.028   | 0.01   | -6.68369645  | 3.95E-09    | ** |
| siR_291503 | 4.2185  | 0.01   | -8.72058632  | 3.03E-35    | ** |
| siR_291599 | 1.9852  | 0.01   | -7.63314056  | 5.78E-17    | ** |
| siR_291606 | 1.418   | 0.01   | -7.14771372  | 2.54E-12    | ** |
| siR_29164  | 13.7191 | 4.9601 | -1.46774473  | 3.37E-27    | ** |
| siR_291641 | 1.5598  | 0.01   | -7.28521726  | 1.75E-13    | ** |
| siR_291656 | 1.8079  | 0.01   | -7.49817107  | 1.63E-15    | ** |
| siR_29166  | 2.5169  | 2.0885 | -0.26918075  | 0.298578358 |    |
| siR_29170  | 2.0206  | 0.8951 | -1.17466298  | 0.000528718 | ** |
| siR_291850 | 1.2053  | 0.01   | -6.91324847  | 1.40E-10    | ** |
| siR_291924 | 1.2053  | 0.01   | -6.91324847  | 1.40E-10    | ** |
| siR_291992 | 1.2053  | 0.01   | -6.91324847  | 1.40E-10    | ** |
| siR_291999 | 1.2053  | 0.01   | -6.91324847  | 1.40E-10    | ** |
| siR_292048 | 9.6424  | 0.01   | -9.91324847  | 1.22E-79    | ** |
| siR_292049 | 5.4593  | 0.01   | -9.09257214  | 2.12E-45    | ** |
| siR_292050 | 1.9497  | 0.01   | -7.60710834  | 1.13E-16    | ** |
| siR_292051 | 1.418   | 0.01   | -7.14771372  | 2.54E-12    | ** |
| siR_292092 | 1.028   | 0.01   | -6.68369645  | 3.95E-09    | ** |
| siR_292096 | 1.1698  | 0.01   | -6.87011809  | 2.73E-10    | ** |
| siR_29216  | 0.01    | 1.0069 | 6.6537766    | 3.63E-09    | ** |
| siR_29219  | 0.01    | 1.3426 | 7.06888574   | 5.63E-12    | ** |
| siR_292280 | 1.1344  | 0.01   | -6.82578563  | 5.32E-10    | ** |
| siR_292327 | 15.4207 | 0.01   | -10.59065252 | 6.19E-127   | ** |
| siR_292363 | 4.0058  | 0.01   | -8.64594661  | 1.67E-33    | ** |
| siR_292448 | 13.4001 | 0.01   | -10.38802803 | 2.14E-110   | ** |
| siR_292536 | 1.0635  | 0.01   | -6.73267622  | 2.02E-09    | ** |
| siR_292579 | 1.4534  | 0.01   | -7.18328801  | 1.30E-12    | ** |
| siR_292602 | 3.7931  | 0.01   | -8.56723361  | 9.20E-32    | ** |
| siR_292659 | 1.2407  | 0.01   | -6.95501051  | 7.17E-11    | ** |
| siR_292666 | 4.2894  | 0.01   | -8.74463204  | 7.97E-36    | ** |
| siR_292717 | 1.5952  | 0.01   | -7.31759351  | 8.99E-14    | ** |
| siR_29274  | 6.9482  | 6.5264 | -0.09035187  | 0.548686396 |    |
| siR_292751 | 1.6307  | 0.01   | -7.34934759  | 4.61E-14    | ** |
| siR_292816 | 1.3116  | 0.01   | -7.035184    | 1.88E-11    | ** |
| siR_292856 | 2.0915  | 0.01   | -7.70839418  | 7.79E-18    | ** |
| siR_292949 | 1.028   | 0.01   | -6.68369645  | 3.95E-09    | ** |
| siR_292952 | 2.6942  | 0.01   | -8.07371315  | 9.10E-23    | ** |
| siR_29296  | 1.0635  | 0.9696 | -0.13335843  | 0.73604387  |    |
| siR_292987 | 1.8788  | 0.01   | -7.55366769  | 4.29E-16    | ** |
| siR_293024 | 1.8788  | 0.01   | -7.55366769  | 4.29E-16    | ** |
| siR_293169 | 1.3116  | 0.01   | -7.035184    | 1.88E-11    | ** |
| siR_29317  | 0.01    | 6.7129 | 9.39079234   | 6.26E-57    | ** |
| siR_293185 | 1.1344  | 0.01   | -6.82578563  | 5.32E-10    | ** |

|            |         |          |              |             |    |
|------------|---------|----------|--------------|-------------|----|
| siR_293188 | 5.7074  | 0.01     | -9.15668986  | 1.97E-47    | ** |
| siR_29326  | 0.01    | 153.5761 | 13.9066661   | 0           | ** |
| siR_29327  | 0.01    | 1.8274   | 7.51364865   | 4.92E-16    | ** |
| siR_29328  | 0.01    | 1.0069   | 6.6537766    | 3.63E-09    | ** |
| siR_293300 | 1.1344  | 0.01     | -6.82578563  | 5.32E-10    | ** |
| siR_293317 | 1.6661  | 0.01     | -7.38033118  | 2.36E-14    | ** |
| siR_29332  | 0.01    | 3.5802   | 8.48389637   | 1.05E-30    | ** |
| siR_29335  | 0.01    | 8.0928   | 9.66049513   | 1.76E-68    | ** |
| siR_293362 | 1.2762  | 0.01     | -6.99571063  | 3.67E-11    | ** |
| siR_293399 | 1.7725  | 0.01     | -7.46964183  | 3.18E-15    | ** |
| siR_293444 | 1.9497  | 0.01     | -7.60710834  | 1.13E-16    | ** |
| siR_293445 | 1.5598  | 0.01     | -7.28521726  | 1.75E-13    | ** |
| siR_293485 | 3.545   | 0.01     | -8.4696418   | 9.89E-30    | ** |
| siR_293553 | 1.3471  | 0.01     | -7.07371314  | 9.66E-12    | ** |
| siR_293596 | 2.7296  | 0.01     | -8.09254576  | 4.66E-23    | ** |
| siR_29362  | 1.7016  | 0.8578   | -0.98817872  | 0.005777092 |    |
| siR_293754 | 1.5952  | 0.01     | -7.31759351  | 8.99E-14    | ** |
| siR_293810 | 4.6439  | 0.01     | -8.85919308  | 1.00E-38    | ** |
| siR_293851 | 4.0413  | 0.01     | -8.65867564  | 8.57E-34    | ** |
| siR_293879 | 1.2053  | 0.01     | -6.91324847  | 1.40E-10    | ** |
| siR_293888 | 1.6661  | 0.01     | -7.38033118  | 2.36E-14    | ** |
| siR_293932 | 3.1905  | 0.01     | -8.31763871  | 7.88E-27    | ** |
| siR_293946 | 1.8434  | 0.01     | -7.52622535  | 8.37E-16    | ** |
| siR_29395  | 1.0635  | 0.1492   | -2.83350059  | 6.84E-06    | ** |
| siR_293956 | 2.3397  | 0.01     | -7.87017976  | 7.25E-20    | ** |
| siR_294061 | 1.2053  | 0.01     | -6.91324847  | 1.40E-10    | ** |
| siR_294080 | 1.2053  | 0.01     | -6.91324847  | 1.40E-10    | ** |
| siR_294086 | 1.1698  | 0.01     | -6.87011809  | 2.73E-10    | ** |
| siR_294092 | 5.1402  | 0.01     | -9.00568068  | 8.67E-43    | ** |
| siR_294119 | 3.0487  | 0.01     | -8.25205038  | 1.14E-25    | ** |
| siR_294123 | 1.3116  | 0.01     | -7.035184    | 1.88E-11    | ** |
| siR_294128 | 1.2407  | 0.01     | -6.95501051  | 7.17E-11    | ** |
| siR_294186 | 2.7296  | 0.01     | -8.09254576  | 4.66E-23    | ** |
| siR_29421  | 0.01    | 1.1188   | 6.80580835   | 4.20E-10    | ** |
| siR_29424  | 62.4983 | 33.3407  | -0.90653255  | 1.16E-55    |    |
| siR_29425  | 21.27   | 11.7476  | -0.85645398  | 2.46E-18    |    |
| siR_29426  | 1.3116  | 0.7459   | -0.81427367  | 0.04007629  |    |
| siR_294264 | 3.7577  | 0.01     | -8.5537061   | 1.79E-31    | ** |
| siR_294281 | 1.028   | 0.01     | -6.68369645  | 3.95E-09    | ** |
| siR_294287 | 15.7752 | 0.01     | -10.62344255 | 7.77E-130   | ** |
| siR_294296 | 2.2333  | 0.01     | -7.80303324  | 5.38E-19    | ** |
| siR_2943   | 2.3397  | 1.4172   | -0.72328019  | 0.012838607 |    |
| siR_294303 | 6.9836  | 0.01     | -9.44782715  | 7.07E-58    | ** |
| siR_294304 | 2.0915  | 0.01     | -7.70839418  | 7.79E-18    | ** |
| siR_294305 | 1.5243  | 0.01     | -7.25200305  | 3.42E-13    | ** |
| siR_294315 | 3.9704  | 0.01     | -8.63314056  | 3.26E-33    | ** |
| siR_294327 | 1.5952  | 0.01     | -7.31759351  | 8.99E-14    | ** |



|            |          |          |               |              |    |
|------------|----------|----------|---------------|--------------|----|
| siR_294347 | 1. 3116  | 0. 01    | -7. 035184    | 1. 88E-11    | ** |
| siR_294361 | 6. 8418  | 0. 01    | -9. 41823209  | 1. 02E-56    | ** |
| siR_294366 | 1. 7725  | 0. 01    | -7. 46964183  | 3. 18E-15    | ** |
| siR_294439 | 1. 3116  | 0. 01    | -7. 035184    | 1. 88E-11    | ** |
| siR_294458 | 5. 8847  | 0. 01    | -9. 20082503  | 6. 99E-49    | ** |
| siR_294468 | 6. 3101  | 0. 01    | -9. 30151909  | 2. 30E-52    | ** |
| siR_294469 | 4. 5021  | 0. 01    | -8. 81445427  | 1. 45E-37    | ** |
| siR_294483 | 2. 0915  | 0. 01    | -7. 70839418  | 7. 79E-18    | ** |
| siR_294484 | 1. 737   | 0. 01    | -7. 44045394  | 6. 21E-15    | ** |
| siR_294494 | 3. 5804  | 0. 01    | -8. 48397698  | 5. 07E-30    | ** |
| siR_2945   | 1. 9852  | 1. 2307  | -0. 68980523  | 0. 028100039 |    |
| siR_294539 | 1. 3471  | 0. 01    | -7. 07371314  | 9. 66E-12    | ** |
| siR_294555 | 33. 0748 | 0. 01    | -11. 69151666 | 1. 96E-271   | ** |
| siR_294556 | 2. 6233  | 0. 01    | -8. 035239    | 3. 46E-22    | ** |
| siR_294557 | 2. 2333  | 0. 01    | -7. 80303324  | 5. 38E-19    | ** |
| siR_294558 | 1. 9497  | 0. 01    | -7. 60710834  | 1. 13E-16    | ** |
| siR_294559 | 1. 418   | 0. 01    | -7. 14771372  | 2. 54E-12    | ** |
| siR_294663 | 1. 5598  | 0. 01    | -7. 28521726  | 1. 75E-13    | ** |
| siR_294676 | 3. 6513  | 0. 01    | -8. 51226639  | 1. 33E-30    | ** |
| siR_294683 | 4. 2185  | 0. 01    | -8. 72058632  | 3. 03E-35    | ** |
| siR_294687 | 2. 0206  | 0. 01    | -7. 65863995  | 2. 96E-17    | ** |
| siR_294740 | 1. 9497  | 0. 01    | -7. 60710834  | 1. 13E-16    | ** |
| siR_294750 | 1. 2407  | 0. 01    | -6. 95501051  | 7. 17E-11    | ** |
| siR_294804 | 1. 6307  | 0. 01    | -7. 34934759  | 4. 61E-14    | ** |
| siR_294884 | 1. 1344  | 0. 01    | -6. 82578563  | 5. 32E-10    | ** |
| siR_294899 | 19. 462  | 0. 01    | -10. 92644428 | 5. 17E-160   | ** |
| siR_294901 | 20. 4901 | 0. 01    | -11. 00071121 | 1. 99E-168   | ** |
| siR_294902 | 4. 0058  | 0. 01    | -8. 64594661  | 1. 67E-33    | ** |
| siR_295007 | 1. 0989  | 0. 01    | -6. 7799163   | 1. 04E-09    | ** |
| siR_295023 | 1. 1698  | 0. 01    | -6. 87011809  | 2. 73E-10    | ** |
| siR_295087 | 1. 8788  | 0. 01    | -7. 55366769  | 4. 29E-16    | ** |
| siR_295111 | 1. 5598  | 0. 01    | -7. 28521726  | 1. 75E-13    | ** |
| siR_295144 | 31. 0542 | 0. 01    | -11. 60057284 | 6. 79E-255   | ** |
| siR_295169 | 1. 1344  | 0. 01    | -6. 82578563  | 5. 32E-10    | ** |
| siR_295189 | 1. 1698  | 0. 01    | -6. 87011809  | 2. 73E-10    | ** |
| siR_29531  | 1. 737   | 0. 7086  | -1. 29355438  | 0. 00053939  | ** |
| siR_295358 | 1. 0635  | 0. 01    | -6. 73267622  | 2. 02E-09    | ** |
| siR_29538  | 2. 6233  | 0. 5221  | -2. 32898474  | 1. 39E-10    | ** |
| siR_295510 | 1. 2762  | 0. 01    | -6. 99571063  | 3. 67E-11    | ** |
| siR_295519 | 1. 0635  | 0. 01    | -6. 73267622  | 2. 02E-09    | ** |
| siR_29552  | 4. 8212  | 3. 8413  | -0. 32779764  | 0. 081798361 |    |
| siR_29553  | 48. 5664 | 36. 9582 | -0. 39406406  | 4. 53E-11    |    |
| siR_295575 | 1. 9852  | 0. 01    | -7. 63314056  | 5. 78E-17    | ** |
| siR_295599 | 1. 1344  | 0. 01    | -6. 82578563  | 5. 32E-10    | ** |
| siR_295703 | 7. 2672  | 0. 01    | -9. 5052558   | 3. 38E-60    | ** |
| siR_295729 | 7. 1609  | 0. 01    | -9. 48399712  | 2. 51E-59    | ** |
| siR_295740 | 1. 3116  | 0. 01    | -7. 035184    | 1. 88E-11    | ** |

|            |           |          |             |             |    |
|------------|-----------|----------|-------------|-------------|----|
| siR_295920 | 1.028     | 0.01     | -6.68369645 | 3.95E-09    | ** |
| siR_295933 | 5.0693    | 0.01     | -8.98564277 | 3.30E-42    | ** |
| siR_29598  | 7.7635    | 5.0347   | -0.62480139 | 6.26E-05    |    |
| siR_296053 | 4.6085    | 0.01     | -8.84815347 | 1.95E-38    | ** |
| siR_29606  | 2.4815    | 1.6782   | -0.5642978  | 0.039765706 |    |
| siR_296083 | 1.5243    | 0.01     | -7.25200305 | 3.42E-13    | ** |
| siR_296109 | 1.3471    | 0.01     | -7.07371314 | 9.66E-12    | ** |
| siR_296308 | 1.028     | 0.01     | -6.68369645 | 3.95E-09    | ** |
| siR_29636  | 0.01      | 1.0069   | 6.6537766   | 3.63E-09    | ** |
| siR_296381 | 1.5243    | 0.01     | -7.25200305 | 3.42E-13    | ** |
| siR_296426 | 2.0206    | 0.01     | -7.65863995 | 2.96E-17    | ** |
| siR_296442 | 1.2762    | 0.01     | -6.99571063 | 3.67E-11    | ** |
| siR_29652  | 1.2762    | 0.1492   | -3.096535   | 2.35E-07    | ** |
| siR_296551 | 1.2762    | 0.01     | -6.99571063 | 3.67E-11    | ** |
| siR_296584 | 6.6646    | 0.01     | -9.38037452 | 2.89E-55    | ** |
| siR_296598 | 4.5376    | 0.01     | -8.82578561 | 7.42E-38    | ** |
| siR_29669  | 1.6661    | 0.2984   | -2.48115555 | 1.28E-07    | ** |
| siR_296721 | 9.6069    | 0.01     | -9.90792717 | 2.39E-79    | ** |
| siR_296789 | 5.4947    | 0.01     | -9.10189688 | 1.09E-45    | ** |
| siR_29681  | 1225.2568 | 236.8533 | -2.37101848 | 0           | ** |
| siR_29682  | 12.6556   | 5.072    | -1.31914926 | 1.10E-21    | ** |
| siR_29683  | 4.1122    | 0.4475   | -3.19995085 | 1.18E-21    | ** |
| siR_29687  | 16.3424   | 2.3122   | -2.82128177 | 2.67E-72    | ** |
| siR_296871 | 1.0635    | 0.01     | -6.73267622 | 2.02E-09    | ** |
| siR_29688  | 2.0206    | 0.4102   | -2.30038436 | 2.46E-08    | ** |
| siR_296929 | 1.1698    | 0.01     | -6.87011809 | 2.73E-10    | ** |
| siR_29693  | 2.9069    | 0.4848   | -2.58401984 | 6.94E-13    | ** |
| siR_29696  | 53.4231   | 11.673   | -2.19428831 | 2.63E-174   | ** |
| siR_29698  | 4.2894    | 0.7459   | -2.52372173 | 6.14E-18    | ** |
| siR_297015 | 1.9497    | 0.01     | -7.60710834 | 1.13E-16    | ** |
| siR_297037 | 10.635    | 0.01     | -10.0546043 | 9.19E-88    | ** |
| siR_29704  | 0.8862    | 1.6409   | 0.88878309  | 0.012627062 |    |
| siR_297055 | 4.0413    | 0.01     | -8.65867564 | 8.57E-34    | ** |
| siR_29710  | 0.01      | 1.4172   | 7.14689956  | 1.34E-12    | ** |
| siR_297164 | 8.4371    | 0.01     | -9.72060336 | 8.98E-70    | ** |
| siR_297171 | 1.2762    | 0.01     | -6.99571063 | 3.67E-11    | ** |
| siR_297194 | 4.6085    | 0.01     | -8.84815347 | 1.95E-38    | ** |
| siR_29720  | 18.5758   | 3.6548   | -2.34555998 | 7.13E-67    | ** |
| siR_297296 | 1.418     | 0.01     | -7.14771372 | 2.54E-12    | ** |
| siR_297306 | 2.446     | 0.01     | -7.93428061 | 9.77E-21    | ** |
| siR_297357 | 5.4238    | 0.01     | -9.08316017 | 4.14E-45    | ** |
| siR_29741  | 0.01      | 2.0885   | 7.70632333  | 3.21E-18    | ** |
| siR_297410 | 5.7783    | 0.01     | -9.17450131 | 5.19E-48    | ** |
| siR_297413 | 1.2053    | 0.01     | -6.91324847 | 1.40E-10    | ** |
| siR_297437 | 1.8788    | 0.01     | -7.55366769 | 4.29E-16    | ** |
| siR_297460 | 1.5243    | 0.01     | -7.25200305 | 3.42E-13    | ** |
| siR_297464 | 7.799     | 0.01     | -9.60714531 | 1.50E-64    | ** |

|            |         |         |              |             |    |
|------------|---------|---------|--------------|-------------|----|
| siR_297499 | 1.4889  | 0.01    | -7.21810305  | 6.67E-13    | ** |
| siR_29754  | 0.01    | 66.3458 | 12.69578942  | 0           | ** |
| siR_297548 | 1.028   | 0.01    | -6.68369645  | 3.95E-09    | ** |
| siR_297553 | 1.3471  | 0.01    | -7.07371314  | 9.66E-12    | ** |
| siR_29757  | 0.01    | 15.4024 | 10.58893945  | 1.14E-129   | ** |
| siR_29758  | 0.01    | 1.1934  | 6.89893387   | 9.98E-11    | ** |
| siR_297582 | 1.4889  | 0.01    | -7.21810305  | 6.67E-13    | ** |
| siR_29762  | 0.01    | 2.0139  | 7.65384824   | 1.35E-17    | ** |
| siR_297668 | 1.1344  | 0.01    | -6.82578563  | 5.32E-10    | ** |
| siR_297681 | 3.2968  | 0.01    | -8.36492254  | 1.06E-27    | ** |
| siR_297686 | 2.1624  | 0.01    | -7.75648961  | 2.05E-18    | ** |
| siR_29769  | 0.01    | 39.7553 | 11.95693149  | 0           | ** |
| siR_297698 | 1.5598  | 0.01    | -7.28521726  | 1.75E-13    | ** |
| siR_297700 | 2.0561  | 0.01    | -7.68376661  | 1.52E-17    | ** |
| siR_297743 | 3.7931  | 0.01    | -8.56723361  | 9.20E-32    | ** |
| siR_297785 | 1.028   | 0.01    | -6.68369645  | 3.95E-09    | ** |
| siR_297921 | 2.1979  | 0.01    | -7.77998195  | 1.05E-18    | ** |
| siR_2981   | 2.7296  | 1.902   | -0.52117231  | 0.044629502 |    |
| siR_298148 | 1.737   | 0.01    | -7.44045394  | 6.21E-15    | ** |
| siR_298190 | 3.7577  | 0.01    | -8.5537061   | 1.79E-31    | ** |
| siR_2982   | 1.1698  | 0.7086  | -0.72321852  | 0.080618428 |    |
| siR_298269 | 14.4636 | 0.01    | -10.49821097 | 4.23E-119   | ** |
| siR_298294 | 1.737   | 0.01    | -7.44045394  | 6.21E-15    | ** |
| siR_298317 | 1.7725  | 0.01    | -7.46964183  | 3.18E-15    | ** |
| siR_298324 | 8.7561  | 0.01    | -9.77414457  | 2.20E-72    | ** |
| siR_298327 | 3.2614  | 0.01    | -8.34934759  | 2.07E-27    | ** |
| siR_298333 | 4.7857  | 0.01    | -8.90258614  | 6.91E-40    | ** |
| siR_298343 | 2.1979  | 0.01    | -7.77998195  | 1.05E-18    | ** |
| siR_298346 | 2.3751  | 0.01    | -7.89184446  | 3.72E-20    | ** |
| siR_298350 | 9.6424  | 0.01    | -9.91324847  | 1.22E-79    | ** |
| siR_298354 | 6.381   | 0.01    | -9.31763871  | 6.06E-53    | ** |
| siR_298366 | 4.9275  | 0.01    | -8.94471205  | 4.77E-41    | ** |
| siR_298444 | 1.1344  | 0.01    | -6.82578563  | 5.32E-10    | ** |
| siR_298459 | 1.0989  | 0.01    | -6.7799163   | 1.04E-09    | ** |
| siR_298483 | 1.2407  | 0.01    | -6.95501051  | 7.17E-11    | ** |
| siR_298512 | 2.3042  | 0.01    | -7.84812212  | 1.41E-19    | ** |
| siR_298560 | 7.0191  | 0.01    | -9.45514222  | 3.63E-58    | ** |
| siR_29857  | 1.0635  | 0.5967  | -0.83374235  | 0.060029399 |    |
| siR_298597 | 2.3751  | 0.01    | -7.89184446  | 3.72E-20    | ** |
| siR_298611 | 1.1344  | 0.01    | -6.82578563  | 5.32E-10    | ** |
| siR_298617 | 1.2053  | 0.01    | -6.91324847  | 1.40E-10    | ** |
| siR_298622 | 4.4667  | 0.01    | -8.80306553  | 2.82E-37    | ** |
| siR_298638 | 11.3085 | 0.01    | -10.14319183 | 2.82E-93    | ** |
| siR_29865  | 3.6513  | 1.0442  | -1.80601215  | 1.19E-10    | ** |
| siR_298657 | 25.843  | 0.01    | -11.33555776 | 3.06E-212   | ** |
| siR_298661 | 13.1519 | 0.01    | -10.36105555 | 2.30E-108   | ** |
| siR_298700 | 2.127   | 0.01    | -7.73267621  | 3.99E-18    | ** |

|            |         |        |              |             |    |
|------------|---------|--------|--------------|-------------|----|
| siR_29874  | 15.4916 | 4.8855 | -1.66490803  | 2.56E-36    | ** |
| siR_298763 | 1.9497  | 0.01   | -7.60710834  | 1.13E-16    | ** |
| siR_298895 | 1.9852  | 0.01   | -7.63314056  | 5.78E-17    | ** |
| siR_298899 | 1.9143  | 0.01   | -7.58067313  | 2.20E-16    | ** |
| siR_298929 | 1.7725  | 0.01   | -7.46964183  | 3.18E-15    | ** |
| siR_298934 | 1.4534  | 0.01   | -7.18328801  | 1.30E-12    | ** |
| siR_298946 | 2.5878  | 0.01   | -8.0155823   | 6.75E-22    | ** |
| siR_298987 | 14.8181 | 0.01   | -10.53314466 | 5.30E-122   | ** |
| siR_298990 | 3.9704  | 0.01   | -8.63314056  | 3.26E-33    | ** |
| siR_299028 | 7.1963  | 0.01   | -9.49111151  | 1.28E-59    | ** |
| siR_299068 | 1.3116  | 0.01   | -7.035184    | 1.88E-11    | ** |
| siR_29907  | 2.6942  | 1.3426 | -1.0048274   | 0.000409042 | ** |
| siR_29912  | 2.127   | 1.7155 | -0.31019091  | 0.27488112  |    |
| siR_299159 | 15.6334 | 0.01   | -10.61041591 | 1.12E-128   | ** |
| siR_299250 | 3.3323  | 0.01   | -8.38037447  | 5.44E-28    | ** |
| siR_299367 | 1.2762  | 0.01   | -6.99571063  | 3.67E-11    | ** |
| siR_299390 | 1.8788  | 0.01   | -7.55366769  | 4.29E-16    | ** |
| siR_299499 | 1.0635  | 0.01   | -6.73267622  | 2.02E-09    | ** |
| siR_299602 | 18.9657 | 0.01   | -10.88917703 | 5.97E-156   | ** |
| siR_299784 | 2.2333  | 0.01   | -7.80303324  | 5.38E-19    | ** |
| siR_29981  | 1.4534  | 0.6713 | -1.11440226  | 0.004972851 | ** |
| siR_299834 | 2.1979  | 0.01   | -7.77998195  | 1.05E-18    | ** |
| siR_299855 | 20.2065 | 0.01   | -10.98060361 | 4.17E-166   | ** |
| siR_299878 | 84.9026 | 0.01   | -13.0515933  | 0           | ** |
| siR_299881 | 2.7651  | 0.01   | -8.11118786  | 2.39E-23    | ** |
| siR_299887 | 6.0265  | 0.01   | -9.23517658  | 4.83E-50    | ** |
| siR_299934 | 4.6794  | 0.01   | -8.87017976  | 5.13E-39    | ** |
| siR_29994  | 0.01    | 1.0815 | 6.75688986   | 8.62E-10    | ** |
| siR_299963 | 5.8138  | 0.01   | -9.18333764  | 2.66E-48    | ** |
| siR_300035 | 1.2053  | 0.01   | -6.91324847  | 1.40E-10    | ** |
| siR_300060 | 5.3175  | 0.01   | -9.0546043   | 3.07E-44    | ** |
| siR_300063 | 6.9482  | 0.01   | -9.44049544  | 1.38E-57    | ** |
| siR_30013  | 1.4534  | 1.4545 | 0.00109148   | 0.994534605 |    |
| siR_30016  | 1.2762  | 0.4848 | -1.39639284  | 0.001733978 | ** |
| siR_30019  | 1.0989  | 0.4848 | -1.1805985   | 0.010852128 | *  |
| siR_300245 | 1.3825  | 0.01   | -7.11113566  | 4.95E-12    | ** |
| siR_30036  | 1.0989  | 0.5967 | -0.88098242  | 0.045030158 |    |
| siR_30038  | 4.8921  | 1.902  | -1.36293665  | 1.16E-09    | ** |
| siR_300383 | 1.7016  | 0.01   | -7.41074813  | 1.21E-14    | ** |
| siR_300405 | 1.0635  | 0.01   | -6.73267622  | 2.02E-09    | ** |
| siR_300481 | 10.5286 | 0.01   | -10.04009789 | 6.82E-87    | ** |
| siR_300641 | 1.1698  | 0.01   | -6.87011809  | 2.73E-10    | ** |
| siR_300651 | 10.4223 | 0.01   | -10.02545799 | 5.06E-86    | ** |
| siR_300765 | 3.545   | 0.01   | -8.4696418   | 9.89E-30    | ** |
| siR_300800 | 3.0841  | 0.01   | -8.26870574  | 5.85E-26    | ** |
| siR_300801 | 2.5169  | 0.01   | -7.97550407  | 2.57E-21    | ** |
| siR_300849 | 4.573   | 0.01   | -8.83699711  | 3.81E-38    | ** |

|            |         |         |              |             |    |
|------------|---------|---------|--------------|-------------|----|
| siR_300855 | 22.2626 | 0.01    | -11.12040648 | 6.18E-183   | ** |
| siR_300914 | 2.1624  | 0.01    | -7.75648961  | 2.05E-18    | ** |
| siR_300917 | 1.9497  | 0.01    | -7.60710834  | 1.13E-16    | ** |
| siR_300959 | 16.307  | 0.01    | -10.67127563 | 3.45E-134   | ** |
| siR_300974 | 3.9704  | 0.01    | -8.63314056  | 3.26E-33    | ** |
| siR_300987 | 1.6307  | 0.01    | -7.34934759  | 4.61E-14    | ** |
| siR_300988 | 2.3042  | 0.01    | -7.84812212  | 1.41E-19    | ** |
| siR_300989 | 1.9852  | 0.01    | -7.63314056  | 5.78E-17    | ** |
| siR_300995 | 2.4106  | 0.01    | -7.91324847  | 1.91E-20    | ** |
| siR_301039 | 4.3249  | 0.01    | -8.75652296  | 4.09E-36    | ** |
| siR_301049 | 8.1535  | 0.01    | -9.67127563  | 1.88E-67    | ** |
| siR_301057 | 2.0206  | 0.01    | -7.65863995  | 2.96E-17    | ** |
| siR_301060 | 3.545   | 0.01    | -8.4696418   | 9.89E-30    | ** |
| siR_301078 | 1.2762  | 0.01    | -6.99571063  | 3.67E-11    | ** |
| siR_301080 | 7.0545  | 0.01    | -9.46240003  | 1.86E-58    | ** |
| siR_301099 | 1.7725  | 0.01    | -7.46964183  | 3.18E-15    | ** |
| siR_301101 | 6.5937  | 0.01    | -9.36494442  | 1.10E-54    | ** |
| siR_301139 | 12.4429 | 0.01    | -10.281107   | 1.46E-102   | ** |
| siR_301142 | 37.3997 | 0.01    | -11.86881111 | 7.82E-307   | ** |
| siR_301143 | 1.3471  | 0.01    | -7.07371314  | 9.66E-12    | ** |
| siR_301147 | 11.5212 | 0.01    | -10.17007535 | 5.12E-95    | ** |
| siR_301148 | 1.4889  | 0.01    | -7.21810305  | 6.67E-13    | ** |
| siR_301161 | 2.1624  | 0.01    | -7.75648961  | 2.05E-18    | ** |
| siR_301169 | 3.9349  | 0.01    | -8.62018319  | 6.36E-33    | ** |
| siR_301172 | 6.1328  | 0.01    | -9.26040207  | 6.51E-51    | ** |
| siR_301187 | 1.4889  | 0.01    | -7.21810305  | 6.67E-13    | ** |
| siR_301199 | 5.8138  | 0.01    | -9.18333764  | 2.66E-48    | ** |
| siR_30120  | 19.4266 | 10.1066 | -0.94273569  | 1.43E-19    |    |
| siR_30121  | 13.2937 | 7.9809  | -0.73611935  | 1.38E-09    |    |
| siR_301213 | 2.2333  | 0.01    | -7.80303324  | 5.38E-19    | ** |
| siR_301232 | 1.8434  | 0.01    | -7.52622535  | 8.37E-16    | ** |
| siR_301238 | 4.7148  | 0.01    | -8.88105279  | 2.63E-39    | ** |
| siR_301239 | 1.9143  | 0.01    | -7.58067313  | 2.20E-16    | ** |
| siR_301244 | 1.5952  | 0.01    | -7.31759351  | 8.99E-14    | ** |
| siR_301249 | 13.4355 | 0.01    | -10.39183435 | 1.10E-110   | ** |
| siR_3013   | 0.01    | 1.1561  | 6.85312238   | 2.05E-10    | ** |
| siR_301302 | 19.3911 | 0.01    | -10.92117894 | 1.97E-159   | ** |
| siR_301304 | 23.6097 | 0.01    | -11.20516408 | 5.82E-194   | ** |
| siR_301307 | 1.4534  | 0.01    | -7.18328801  | 1.30E-12    | ** |
| siR_301313 | 1.5243  | 0.01    | -7.25200305  | 3.42E-13    | ** |
| siR_301343 | 11.1667 | 0.01    | -10.12498721 | 4.08E-92    | ** |
| siR_301345 | 1.418   | 0.01    | -7.14771372  | 2.54E-12    | ** |
| siR_301366 | 1.4889  | 0.01    | -7.21810305  | 6.67E-13    | ** |
| siR_30137  | 13.79   | 7.3096  | -0.91575809  | 1.02E-13    |    |
| siR_301371 | 2.1979  | 0.01    | -7.77998195  | 1.05E-18    | ** |
| siR_30138  | 1.2053  | 0.8951  | -0.42927151  | 0.267810892 |    |
| siR_301386 | 1.3116  | 0.01    | -7.035184    | 1.88E-11    | ** |

|            |         |         |              |             |    |
|------------|---------|---------|--------------|-------------|----|
| siR_30139  | 1.4889  | 0.8951  | -0.73412609  | 0.045190204 |    |
| siR_30146  | 0.01    | 4.9601  | 8.9542254    | 2.94E-42    | ** |
| siR_30147  | 0.01    | 3.5056  | 8.45351758   | 4.40E-30    | ** |
| siR_301478 | 3.3323  | 0.01    | -8.38037447  | 5.44E-28    | ** |
| siR_3015   | 1.1344  | 2.0885  | 0.88053771   | 0.005175999 |    |
| siR_301552 | 2.0206  | 0.01    | -7.65863995  | 2.96E-17    | ** |
| siR_301558 | 1.5598  | 0.01    | -7.28521726  | 1.75E-13    | ** |
| siR_301559 | 1.4534  | 0.01    | -7.18328801  | 1.30E-12    | ** |
| siR_301567 | 1.2407  | 0.01    | -6.95501051  | 7.17E-11    | ** |
| siR_301572 | 2.6587  | 0.01    | -8.05457718  | 1.77E-22    | ** |
| siR_30158  | 0.01    | 9.3608  | 9.87048802   | 4.28E-79    | ** |
| siR_301583 | 2.6942  | 0.01    | -8.07371315  | 9.10E-23    | ** |
| siR_301584 | 1.028   | 0.01    | -6.68369645  | 3.95E-09    | ** |
| siR_30159  | 0.01    | 2.0512  | 7.68032436   | 6.59E-18    | ** |
| siR_301594 | 1.9852  | 0.01    | -7.63314056  | 5.78E-17    | ** |
| siR_3016   | 3.8995  | 1.7901  | -1.12324897  | 3.09E-06    | ** |
| siR_30165  | 0.01    | 4.1769  | 8.70628879   | 1.06E-35    | ** |
| siR_301652 | 13.1165 | 0.01    | -10.3571671  | 4.49E-108   | ** |
| siR_301659 | 15.1726 | 0.01    | -10.56725266 | 6.65E-125   | ** |
| siR_301696 | 1.028   | 0.01    | -6.68369645  | 3.95E-09    | ** |
| siR_301704 | 1.5598  | 0.01    | -7.28521726  | 1.75E-13    | ** |
| siR_301777 | 5.2111  | 0.01    | -9.02544416  | 2.28E-43    | ** |
| siR_30182  | 4.573   | 1.902   | -1.26562367  | 2.77E-08    | ** |
| siR_301906 | 1.2053  | 0.01    | -6.91324847  | 1.40E-10    | ** |
| siR_301967 | 3.9704  | 0.01    | -8.63314056  | 3.26E-33    | ** |
| siR_302016 | 1.6661  | 0.01    | -7.38033118  | 2.36E-14    | ** |
| siR_30207  | 1.3825  | 0.4848  | -1.51181788  | 0.000534972 | ** |
| siR_302095 | 3.4741  | 0.01    | -8.44049549  | 3.76E-29    | ** |
| siR_3021   | 0.01    | 1.0069  | 6.6537766    | 3.63E-09    | ** |
| siR_302127 | 1.2053  | 0.01    | -6.91324847  | 1.40E-10    | ** |
| siR_302175 | 2.2333  | 0.01    | -7.80303324  | 5.38E-19    | ** |
| siR_302186 | 2.446   | 0.01    | -7.93428061  | 9.77E-21    | ** |
| siR_302252 | 2.1624  | 0.01    | -7.75648961  | 2.05E-18    | ** |
| siR_302279 | 1.5952  | 0.01    | -7.31759351  | 8.99E-14    | ** |
| siR_302321 | 1.5952  | 0.01    | -7.31759351  | 8.99E-14    | ** |
| siR_302400 | 22.6171 | 0.01    | -11.14319835 | 7.76E-186   | ** |
| siR_302404 | 10.3514 | 0.01    | -10.01561019 | 1.93E-85    | ** |
| siR_302407 | 3.2614  | 0.01    | -8.34934759  | 2.07E-27    | ** |
| siR_30243  | 30.7351 | 27.8212 | -0.14370253  | 0.046034134 |    |
| siR_302455 | 4.3249  | 0.01    | -8.75652296  | 4.09E-36    | ** |
| siR_302496 | 2.836   | 0.01    | -8.14771372  | 6.28E-24    | ** |
| siR_302499 | 1.2407  | 0.01    | -6.95501051  | 7.17E-11    | ** |
| siR_302514 | 2.5878  | 0.01    | -8.0155823   | 6.75E-22    | ** |
| siR_302518 | 1.2762  | 0.01    | -6.99571063  | 3.67E-11    | ** |
| siR_302522 | 1.3825  | 0.01    | -7.11113566  | 4.95E-12    | ** |
| siR_302578 | 1.4534  | 0.01    | -7.18328801  | 1.30E-12    | ** |
| siR_302590 | 1.737   | 0.01    | -7.44045394  | 6.21E-15    | ** |

|            |          |        |              |             |    |
|------------|----------|--------|--------------|-------------|----|
| siR_302613 | 197.7398 | 0.01   | -14.2713159  | 0           | ** |
| siR_302638 | 2.5878   | 0.01   | -8.0155823   | 6.75E-22    | ** |
| siR_302640 | 216.032  | 0.01   | -14.39895861 | 0           | ** |
| siR_302641 | 4.8921   | 0.01   | -8.93431011  | 9.31E-41    | ** |
| siR_302656 | 4.8921   | 0.01   | -8.93431011  | 9.31E-41    | ** |
| siR_3027   | 0.01     | 4.4753 | 8.80584059   | 3.37E-38    | ** |
| siR_302707 | 23.9996  | 0.01   | -11.22879468 | 3.74E-197   | ** |
| siR_302717 | 1.6307   | 0.01   | -7.34934759  | 4.61E-14    | ** |
| siR_302719 | 1.0635   | 0.01   | -6.73267622  | 2.02E-09    | ** |
| siR_302731 | 6.2037   | 0.01   | -9.27698508  | 1.71E-51    | ** |
| siR_302742 | 2.9069   | 0.01   | -8.18333764  | 1.65E-24    | ** |
| siR_302745 | 1.2053   | 0.01   | -6.91324847  | 1.40E-10    | ** |
| siR_302783 | 3.5095   | 0.01   | -8.45512172  | 1.93E-29    | ** |
| siR_302812 | 44.7378  | 0.01   | -12.12727876 | 0           | ** |
| siR_302816 | 17.2641  | 0.01   | -10.75355937 | 5.05E-142   | ** |
| siR_302822 | 90.0783  | 0.01   | -13.13696426 | 0           | ** |
| siR_302880 | 7.1254   | 0.01   | -9.47682718  | 4.89E-59    | ** |
| siR_302895 | 31.6214  | 0.01   | -11.62668568 | 1.55E-259   | ** |
| siR_302943 | 4.3603   | 0.01   | -8.76828358  | 2.10E-36    | ** |
| siR_302956 | 2.4106   | 0.01   | -7.91324847  | 1.91E-20    | ** |
| siR_302960 | 1.9852   | 0.01   | -7.63314056  | 5.78E-17    | ** |
| siR_303022 | 2.2688   | 0.01   | -7.82578561  | 2.76E-19    | ** |
| siR_303025 | 1.028    | 0.01   | -6.68369645  | 3.95E-09    | ** |
| siR_303076 | 1.418    | 0.01   | -7.14771372  | 2.54E-12    | ** |
| siR_303085 | 1.7016   | 0.01   | -7.41074813  | 1.21E-14    | ** |
| siR_3031   | 3.9349   | 2.797  | -0.49244672  | 0.021807658 |    |
| siR_303100 | 1.0635   | 0.01   | -6.73267622  | 2.02E-09    | ** |
| siR_303150 | 1.1698   | 0.01   | -6.87011809  | 2.73E-10    | ** |
| siR_303161 | 3.6159   | 0.01   | -8.49821097  | 2.60E-30    | ** |
| siR_303171 | 13.3292  | 0.01   | -10.38037443 | 8.15E-110   | ** |
| siR_303174 | 1.1344   | 0.01   | -6.82578563  | 5.32E-10    | ** |
| siR_303175 | 1.8434   | 0.01   | -7.52622535  | 8.37E-16    | ** |
| siR_303176 | 4.2894   | 0.01   | -8.74463204  | 7.97E-36    | ** |
| siR_30319  | 4.3958   | 3.2446 | -0.43808512  | 0.029391782 |    |
| siR_3032   | 1.9497   | 1.529  | -0.35066375  | 0.240835039 |    |
| siR_303254 | 1.6307   | 0.01   | -7.34934759  | 4.61E-14    | ** |
| siR_303282 | 1.4889   | 0.01   | -7.21810305  | 6.67E-13    | ** |
| siR_303306 | 1.418    | 0.01   | -7.14771372  | 2.54E-12    | ** |
| siR_303479 | 1.5598   | 0.01   | -7.28521726  | 1.75E-13    | ** |
| siR_303482 | 6.5582   | 0.01   | -9.35715612  | 2.15E-54    | ** |
| siR_303505 | 4.2894   | 0.01   | -8.74463204  | 7.97E-36    | ** |
| siR_303507 | 14.2863  | 0.01   | -10.48041661 | 1.19E-117   | ** |
| siR_303522 | 2.8005   | 0.01   | -8.12954063  | 1.23E-23    | ** |
| siR_303540 | 1.418    | 0.01   | -7.14771372  | 2.54E-12    | ** |
| siR_303543 | 2.4815   | 0.01   | -7.95506863  | 5.01E-21    | ** |
| siR_303551 | 5.282    | 0.01   | -9.04494046  | 5.99E-44    | ** |
| siR_303553 | 4.3249   | 0.01   | -8.75652296  | 4.09E-36    | ** |

|            |          |         |             |             |    |
|------------|----------|---------|-------------|-------------|----|
| siR_30360  | 0.01     | 8.9132  | 9.79979967  | 2.39E-75    | ** |
| siR_303611 | 2.0206   | 0.01    | -7.65863995 | 2.96E-17    | ** |
| siR_303798 | 1.5243   | 0.01    | -7.25200305 | 3.42E-13    | ** |
| siR_303809 | 1.5952   | 0.01    | -7.31759351 | 8.99E-14    | ** |
| siR_30392  | 4.8212   | 1.6409  | -1.55490496 | 2.65E-11    | ** |
| siR_303925 | 1.418    | 0.01    | -7.14771372 | 2.54E-12    | ** |
| siR_303926 | 1.3471   | 0.01    | -7.07371314 | 9.66E-12    | ** |
| siR_30393  | 1.1344   | 0.3356  | -1.75711482 | 0.000500636 | ** |
| siR_3040   | 60.9739  | 33.378  | -0.86929431 | 9.44E-51    |    |
| siR_3041   | 5.3175   | 2.2003  | -1.27304789 | 1.73E-09    | ** |
| siR_30421  | 0.01     | 2.2003  | 7.78155643  | 3.72E-19    | ** |
| siR_30424  | 0.01     | 1.4918  | 7.22091032  | 3.17E-13    | ** |
| siR_30428  | 0.01     | 1.4172  | 7.14689956  | 1.34E-12    | ** |
| siR_304289 | 1.737    | 0.01    | -7.44045394 | 6.21E-15    | ** |
| siR_30439  | 0.01     | 1.0069  | 6.6537766   | 3.63E-09    | ** |
| siR_30452  | 68.3475  | 44.7153 | -0.61212001 | 1.55E-31    |    |
| siR_30453  | 25.8076  | 14.9548 | -0.78718737 | 3.52E-19    |    |
| siR_30454  | 8.827    | 3.804   | -1.21440595 | 7.07E-14    | ** |
| siR_30455  | 2.0561   | 2.1258  | 0.04809544  | 0.856483635 |    |
| siR_30457  | 1.9143   | 0.634   | -1.59426219 | 2.13E-05    | ** |
| siR_304603 | 1.7016   | 0.01    | -7.41074813 | 1.21E-14    | ** |
| siR_30463  | 28.9981  | 20.5862 | -0.49428083 | 3.59E-10    |    |
| siR_30464  | 24.6023  | 15.4397 | -0.67214847 | 2.67E-14    |    |
| siR_30465  | 3.0841   | 1.7901  | -0.78480936 | 0.002127844 |    |
| siR_30466  | 1.2407   | 1.3053  | 0.07322711  | 0.830255381 |    |
| siR_30467  | 1.5243   | 1.0442  | -0.54574881 | 0.119431711 |    |
| siR_30475  | 0.01     | 28.4925 | 11.4763665  | 3.04E-239   | ** |
| siR_30476  | 0.01     | 20.2133 | 10.98108916 | 6.12E-170   | ** |
| siR_30477  | 0.01     | 4.6244  | 8.85312238  | 1.90E-39    | ** |
| siR_30478  | 0.01     | 3.7667  | 8.55715732  | 2.87E-32    | ** |
| siR_304781 | 6.7709   | 0.01    | -9.40320384 | 3.90E-56    | ** |
| siR_304826 | 1.0635   | 0.01    | -6.73267622 | 2.02E-09    | ** |
| siR_30483  | 183.099  | 87.8271 | -1.05988584 | 5.14E-206   | ** |
| siR_304835 | 2.0915   | 0.01    | -7.70839418 | 7.79E-18    | ** |
| siR_30484  | 137.5104 | 74.6623 | -0.88108888 | 1.07E-114   |    |
| siR_30485  | 10.1387  | 6.1535  | -0.72039355 | 2.11E-07    |    |
| siR_30486  | 5.7074   | 3.8413  | -0.57123904 | 0.00155076  |    |
| siR_304860 | 1.7725   | 0.01    | -7.46964183 | 3.18E-15    | ** |
| siR_304861 | 1.2407   | 0.01    | -6.95501051 | 7.17E-11    | ** |
| siR_304890 | 2.4106   | 0.01    | -7.91324847 | 1.91E-20    | ** |
| siR_30492  | 0.01     | 1.268   | 6.98641094  | 2.37E-11    | ** |
| siR_304971 | 2.6233   | 0.01    | -8.035239   | 3.46E-22    | ** |
| siR_30501  | 0.01     | 18.3486 | 10.84145427 | 2.49E-154   | ** |
| siR_30502  | 0.01     | 1.2307  | 6.94333532  | 4.86E-11    | ** |
| siR_305039 | 5.4947   | 0.01    | -9.10189688 | 1.09E-45    | ** |
| siR_305050 | 6.0619   | 0.01    | -9.24362624 | 2.48E-50    | ** |
| siR_305118 | 1.7725   | 0.01    | -7.46964183 | 3.18E-15    | ** |



|            |          |         |              |             |    |
|------------|----------|---------|--------------|-------------|----|
| siR_30512  | 60.3713  | 37.5922 | -0.68342952  | 9.61E-34    |    |
| siR_305121 | 1.5952   | 0.01    | -7.31759351  | 8.99E-14    | ** |
| siR_305125 | 1.0635   | 0.01    | -6.73267622  | 2.02E-09    | ** |
| siR_30513  | 49.7717  | 33.8255 | -0.5572144   | 5.07E-20    |    |
| siR_305132 | 1.5952   | 0.01    | -7.31759351  | 8.99E-14    | ** |
| siR_305134 | 2.3397   | 0.01    | -7.87017976  | 7.25E-20    | ** |
| siR_30514  | 12.1593  | 9.2116  | -0.40053651  | 0.000831439 |    |
| siR_30515  | 2.127    | 1.4918  | -0.5117659   | 0.08176816  |    |
| siR_30522  | 110.9938 | 64.2573 | -0.78854682  | 3.20E-77    |    |
| siR_30523  | 16.0234  | 8.2047  | -0.96565782  | 5.13E-17    |    |
| siR_30524  | 4.0058   | 2.163   | -0.88905673  | 9.66E-05    |    |
| siR_30525  | 4.2185   | 1.8274  | -1.20693764  | 2.76E-07    | ** |
| siR_30526  | 3.0487   | 1.6409  | -0.89370687  | 0.000645306 |    |
| siR_30527  | 4.4312   | 1.0815  | -2.03466378  | 1.46E-14    | ** |
| siR_30533  | 1.1698   | 0.5967  | -0.97118421  | 0.024714955 |    |
| siR_305367 | 6.6646   | 0.01    | -9.38037452  | 2.89E-55    | ** |
| siR_305376 | 1.2053   | 0.01    | -6.91324847  | 1.40E-10    | ** |
| siR_305453 | 1.0989   | 0.01    | -6.7799163   | 1.04E-09    | ** |
| siR_305454 | 3.4386   | 0.01    | -8.42567749  | 7.34E-29    | ** |
| siR_30547  | 5.7783   | 2.3495  | -1.29829134  | 1.83E-10    | ** |
| siR_305475 | 1.5598   | 0.01    | -7.28521726  | 1.75E-13    | ** |
| siR_305510 | 3.545    | 0.01    | -8.4696418   | 9.89E-30    | ** |
| siR_305559 | 2.0561   | 0.01    | -7.68376661  | 1.52E-17    | ** |
| siR_30556  | 4.8921   | 2.9089  | -0.74998019  | 0.000193843 |    |
| siR_30557  | 5.6365   | 2.6106  | -1.11041817  | 2.63E-08    | ** |
| siR_30558  | 3.0841   | 2.1258  | -0.53684367  | 0.028209785 |    |
| siR_305621 | 18.8948  | 0.01    | -10.88377365 | 2.27E-155   | ** |
| siR_305711 | 1.3116   | 0.01    | -7.035184    | 1.88E-11    | ** |
| siR_30582  | 2.2688   | 1.5663  | -0.53456887  | 0.061356042 |    |
| siR_30583  | 1.028    | 1.0442  | 0.0225578    | 0.949940384 |    |
| siR_305850 | 2.6233   | 0.01    | -8.035239    | 3.46E-22    | ** |
| siR_30587  | 44.9151  | 23.7189 | -0.92116344  | 1.50E-41    |    |
| siR_305875 | 1.2762   | 0.01    | -6.99571063  | 3.67E-11    | ** |
| siR_30588  | 16.8033  | 8.5776  | -0.97009865  | 6.79E-18    |    |
| siR_30589  | 1.5243   | 1.1934  | -0.35306919  | 0.297736258 |    |
| siR_30592  | 2.9423   | 2.3122  | -0.34767816  | 0.151643068 |    |
| siR_305926 | 2.3397   | 0.01    | -7.87017976  | 7.25E-20    | ** |
| siR_305935 | 10.3868  | 0.01    | -10.02053558 | 9.87E-86    | ** |
| siR_306021 | 3.0132   | 0.01    | -8.23515263  | 2.23E-25    | ** |
| siR_306050 | 1.0635   | 0.01    | -6.73267622  | 2.02E-09    | ** |
| siR_306053 | 4.0058   | 0.01    | -8.64594661  | 1.67E-33    | ** |
| siR_30610  | 0.01     | 8.0555  | 9.65383033   | 3.61E-68    | ** |
| siR_30611  | 0.01     | 5.5941  | 9.12776223   | 1.45E-47    | ** |
| siR_30618  | 1.1344   | 0.634   | -0.83937469  | 0.050540314 |    |
| siR_306205 | 12.6911  | 0.01    | -10.30960134 | 1.36E-104   | ** |
| siR_30622  | 2.6233   | 2.6852  | 0.03364674   | 0.886272722 |    |
| siR_306252 | 1.0635   | 0.01    | -6.73267622  | 2.02E-09    | ** |

|            |         |         |             |             |    |
|------------|---------|---------|-------------|-------------|----|
| siR_30629  | 77.5291 | 48.8177 | -0.66733359 | 3.71E-41    |    |
| siR_30630  | 30.2034 | 14.8803 | -1.02130735 | 1.68E-33    | ** |
| siR_30631  | 4.2894  | 3.3937  | -0.33791682 | 0.091322346 |    |
| siR_30632  | 2.6233  | 2.0512  | -0.35491464 | 0.167800849 |    |
| siR_30633  | 1.3116  | 0.9696  | -0.4358662  | 0.240578977 |    |
| siR_306369 | 1.9143  | 0.01    | -7.58067313 | 2.20E-16    | ** |
| siR_30638  | 0.01    | 7.4961  | 9.54999639  | 1.74E-63    | ** |
| siR_30644  | 1.5952  | 1.0442  | -0.61133925 | 0.07756025  |    |
| siR_306469 | 2.2688  | 0.01    | -7.82578561 | 2.76E-19    | ** |
| siR_30648  | 1.9497  | 0.7832  | -1.31579948 | 0.000200133 | ** |
| siR_306505 | 2.6587  | 0.01    | -8.05457718 | 1.77E-22    | ** |
| siR_30651  | 8.6143  | 3.6175  | -1.25174055 | 3.64E-14    | ** |
| siR_306513 | 1.3471  | 0.01    | -7.07371314 | 9.66E-12    | ** |
| siR_30652  | 3.7222  | 1.9766  | -0.91313463 | 0.000121613 |    |
| siR_306528 | 5.9201  | 0.01    | -9.2094777  | 3.58E-49    | ** |
| siR_30654  | 1.0989  | 0.6713  | -0.71103056 | 0.095545863 |    |
| siR_30655  | 2.1624  | 0.5594  | -1.95068126 | 1.98E-07    | ** |
| siR_306558 | 1.2053  | 0.01    | -6.91324847 | 1.40E-10    | ** |
| siR_30667  | 0.01    | 4.6244  | 8.85312238  | 1.90E-39    | ** |
| siR_30668  | 0.01    | 3.5429  | 8.46878694  | 2.15E-30    | ** |
| siR_306684 | 6.5937  | 0.01    | -9.36494442 | 1.10E-54    | ** |
| siR_306685 | 4.0767  | 0.01    | -8.67125799 | 4.39E-34    | ** |
| siR_30669  | 0.01    | 1.0815  | 6.75688986  | 8.62E-10    | ** |
| siR_30674  | 19.6038 | 15.738  | -0.31688112 | 0.000653508 |    |
| siR_30675  | 6.6646  | 6.601   | -0.01383369 | 0.928594901 |    |
| siR_30676  | 4.3958  | 4.5871  | 0.06145661  | 0.736746297 |    |
| siR_30677  | 1.6307  | 0.9696  | -0.75002979 | 0.032577757 |    |
| siR_30693  | 4.4667  | 2.7225  | -0.71427731 | 0.000645052 |    |
| siR_30694  | 1.1344  | 0.4848  | -1.22646783 | 0.007625228 | ** |
| siR_30700  | 10.7413 | 5.333   | -1.01014938 | 1.07E-12    | ** |
| siR_30701  | 7.3736  | 4.5499  | -0.69653432 | 1.75E-05    |    |
| siR_30702  | 3.2259  | 2.6852  | -0.26467217 | 0.246114785 |    |
| siR_30716  | 15.1017 | 8.5776  | -0.81606502 | 1.67E-12    |    |
| siR_30720  | 93.517  | 60.9009 | -0.6187651  | 2.56E-43    |    |
| siR_307240 | 1.2407  | 0.01    | -6.95501051 | 7.17E-11    | ** |
| siR_30727  | 8.6143  | 6.974   | -0.3047472  | 0.029631825 |    |
| siR_307290 | 1.2407  | 0.01    | -6.95501051 | 7.17E-11    | ** |
| siR_307333 | 1.3825  | 0.01    | -7.11113566 | 4.95E-12    | ** |
| siR_307346 | 4.0058  | 0.01    | -8.64594661 | 1.67E-33    | ** |
| siR_307348 | 1.0635  | 0.01    | -6.73267622 | 2.02E-09    | ** |
| siR_307354 | 1.3825  | 0.01    | -7.11113566 | 4.95E-12    | ** |
| siR_307433 | 3.5804  | 0.01    | -8.48397698 | 5.07E-30    | ** |
| siR_307441 | 1.4534  | 0.01    | -7.18328801 | 1.30E-12    | ** |
| siR_30748  | 1.0635  | 0.634   | -0.74626529 | 0.087380955 |    |
| siR_307495 | 8.2953  | 0.01    | -9.69615036 | 1.30E-68    | ** |
| siR_307583 | 1.5243  | 0.01    | -7.25200305 | 3.42E-13    | ** |
| siR_30763  | 1.418   | 0.6713  | -1.07882799 | 0.006897488 | ** |

|            |         |         |              |             |    |
|------------|---------|---------|--------------|-------------|----|
| siR_307653 | 1.2407  | 0.01    | -6.95501051  | 7.17E-11    | ** |
| siR_3077   | 0.8862  | 1.0815  | 0.28732943   | 0.466872116 |    |
| siR_307836 | 1.7725  | 0.01    | -7.46964183  | 3.18E-15    | ** |
| siR_307897 | 6.1328  | 0.01    | -9.26040207  | 6.51E-51    | ** |
| siR_307903 | 1.6307  | 0.01    | -7.34934759  | 4.61E-14    | ** |
| siR_307934 | 1.8434  | 0.01    | -7.52622535  | 8.37E-16    | ** |
| siR_307970 | 1.028   | 0.01    | -6.68369645  | 3.95E-09    | ** |
| siR_308000 | 1.0989  | 0.01    | -6.7799163   | 1.04E-09    | ** |
| siR_30801  | 23.5742 | 10.9644 | -1.10438195  | 6.95E-30    | ** |
| siR_30804  | 1.8434  | 0.9696  | -0.92690755  | 0.00641681  |    |
| siR_30812  | 2.2688  | 1.1934  | -0.92685176  | 0.002453239 |    |
| siR_308173 | 8.0471  | 0.01    | -9.65232515  | 1.40E-66    | ** |
| siR_308214 | 1.8079  | 0.01    | -7.49817107  | 1.63E-15    | ** |
| siR_308298 | 3.7931  | 0.01    | -8.56723361  | 9.20E-32    | ** |
| siR_308302 | 2.127   | 0.01    | -7.73267621  | 3.99E-18    | ** |
| siR_308303 | 3.6513  | 0.01    | -8.51226639  | 1.33E-30    | ** |
| siR_308311 | 10.1387 | 0.01    | -9.98565703  | 1.06E-83    | ** |
| siR_308329 | 1.028   | 0.01    | -6.68369645  | 3.95E-09    | ** |
| siR_308334 | 4.3958  | 0.01    | -8.77998192  | 1.07E-36    | ** |
| siR_308462 | 3.5095  | 0.01    | -8.45512172  | 1.93E-29    | ** |
| siR_308680 | 1.8079  | 0.01    | -7.49817107  | 1.63E-15    | ** |
| siR_30872  | 2.2688  | 0.9696  | -1.22646783  | 0.000143035 | ** |
| siR_308783 | 1.1344  | 0.01    | -6.82578563  | 5.32E-10    | ** |
| siR_308785 | 5.2466  | 0.01    | -9.03523897  | 1.17E-43    | ** |
| siR_308786 | 1.8434  | 0.01    | -7.52622535  | 8.37E-16    | ** |
| siR_30886  | 1.7725  | 0.7832  | -1.17833296  | 0.001154208 | ** |
| siR_308870 | 1.0635  | 0.01    | -6.73267622  | 2.02E-09    | ** |
| siR_30896  | 2.4815  | 0.2238  | -3.47093051  | 1.74E-14    | ** |
| siR_308962 | 1.2053  | 0.01    | -6.91324847  | 1.40E-10    | ** |
| siR_308965 | 1.2762  | 0.01    | -6.99571063  | 3.67E-11    | ** |
| siR_30901  | 0.5317  | 1.3053  | 1.29569705   | 0.002583547 | ** |
| siR_309053 | 3.1196  | 0.01    | -8.28521723  | 3.00E-26    | ** |
| siR_309102 | 9.2524  | 0.01    | -9.85368377  | 1.90E-76    | ** |
| siR_309103 | 7.5508  | 0.01    | -9.56048567  | 1.61E-62    | ** |
| siR_309104 | 4.7857  | 0.01    | -8.90258614  | 6.91E-40    | ** |
| siR_309108 | 3.7577  | 0.01    | -8.5537061   | 1.79E-31    | ** |
| siR_309109 | 1.0989  | 0.01    | -6.7799163   | 1.04E-09    | ** |
| siR_309118 | 22.1562 | 0.01    | -11.11349486 | 4.59E-182   | ** |
| siR_309119 | 6.0619  | 0.01    | -9.24362624  | 2.48E-50    | ** |
| siR_30912  | 6.0619  | 4.8855  | -0.31126383  | 0.062919255 |    |
| siR_309120 | 1.418   | 0.01    | -7.14771372  | 2.54E-12    | ** |
| siR_309121 | 1.0635  | 0.01    | -6.73267622  | 2.02E-09    | ** |
| siR_309138 | 15.2789 | 0.01    | -10.57732492 | 8.96E-126   | ** |
| siR_309139 | 11.4858 | 0.01    | -10.16563558 | 9.99E-95    | ** |
| siR_30914  | 48.1765 | 19.8776 | -1.27718601  | 3.31E-74    | ** |
| siR_309140 | 2.1624  | 0.01    | -7.75648961  | 2.05E-18    | ** |
| siR_309141 | 1.418   | 0.01    | -7.14771372  | 2.54E-12    | ** |

|            |         |         |              |               |    |
|------------|---------|---------|--------------|---------------|----|
| siR_309142 | 1.1698  | 0.01    | -6.87011809  | 2.73E-10      | ** |
| siR_309143 | 1.1698  | 0.01    | -6.87011809  | 2.73E-10      | ** |
| siR_309179 | 38.0378 | 0.01    | -11.89321799 | 367689650498e | ** |
| siR_30918  | 6.2037  | 1.8647  | -1.73418538  | 2.82E-16      | ** |
| siR_309180 | 16.0588 | 0.01    | -10.64914846 | 3.71E-132     | ** |
| siR_309181 | 4.1122  | 0.01    | -8.68376664  | 2.25E-34      | ** |
| siR_309182 | 3.5804  | 0.01    | -8.48397698  | 5.07E-30      | ** |
| siR_309183 | 1.8079  | 0.01    | -7.49817107  | 1.63E-15      | ** |
| siR_309184 | 1.7725  | 0.01    | -7.46964183  | 3.18E-15      | ** |
| siR_309185 | 1.5952  | 0.01    | -7.31759351  | 8.99E-14      | ** |
| siR_309199 | 6.9836  | 0.01    | -9.44782715  | 7.07E-58      | ** |
| siR_309200 | 3.864   | 0.01    | -8.59395129  | 2.42E-32      | ** |
| siR_309201 | 1.3116  | 0.01    | -7.035184    | 1.88E-11      | ** |
| siR_309211 | 1.737   | 0.01    | -7.44045394  | 6.21E-15      | ** |
| siR_309254 | 1.5243  | 0.01    | -7.25200305  | 3.42E-13      | ** |
| siR_309255 | 1.1698  | 0.01    | -6.87011809  | 2.73E-10      | ** |
| siR_309259 | 4.9275  | 0.01    | -8.94471205  | 4.77E-41      | ** |
| siR_309260 | 3.9704  | 0.01    | -8.63314056  | 3.26E-33      | ** |
| siR_309261 | 1.2407  | 0.01    | -6.95501051  | 7.17E-11      | ** |
| siR_309375 | 2.6942  | 0.01    | -8.07371315  | 9.10E-23      | ** |
| siR_309390 | 1.9143  | 0.01    | -7.58067313  | 2.20E-16      | ** |
| siR_309391 | 1.4534  | 0.01    | -7.18328801  | 1.30E-12      | ** |
| siR_30942  | 1.6661  | 0.7459  | -1.15942086  | 0.001878284   | ** |
| siR_309445 | 1.4534  | 0.01    | -7.18328801  | 1.30E-12      | ** |
| siR_30945  | 1.1344  | 0.3356  | -1.75711482  | 0.000500636   | ** |
| siR_309463 | 2.9423  | 0.01    | -8.20080054  | 8.47E-25      | ** |
| siR_309518 | 3.8995  | 0.01    | -8.60714536  | 1.24E-32      | ** |
| siR_30953  | 11.0958 | 3.5802  | -1.6319016   | 9.19E-26      | ** |
| siR_30954  | 1.4534  | 0.7086  | -1.03638844  | 0.008088782   | ** |
| siR_309550 | 1.2053  | 0.01    | -6.91324847  | 1.40E-10      | ** |
| siR_30966  | 23.2197 | 14.2463 | -0.70476206  | 1.25E-14      | ** |
| siR_309661 | 1.2407  | 0.01    | -6.95501051  | 7.17E-11      | ** |
| siR_309673 | 1.3116  | 0.01    | -7.035184    | 1.88E-11      | ** |
| siR_30969  | 1.2053  | 0.3729  | -1.69253158  | 0.000467353   | ** |
| siR_30972  | 1.2762  | 0.1492  | -3.096535    | 2.35E-07      | ** |
| siR_309936 | 22.6171 | 0.01    | -11.14319835 | 7.76E-186     | ** |
| siR_310015 | 1.7725  | 0.01    | -7.46964183  | 3.18E-15      | ** |
| siR_310016 | 2.5878  | 0.01    | -8.0155823   | 6.75E-22      | ** |
| siR_310033 | 2.446   | 0.01    | -7.93428061  | 9.77E-21      | ** |
| siR_31004  | 34.5992 | 14.2463 | -1.2801514   | 5.54E-54      | ** |
| siR_31005  | 9.0397  | 3.9531  | -1.19329044  | 7.89E-14      | ** |
| siR_310149 | 4.8212  | 0.01    | -8.91324847  | 3.54E-40      | ** |
| siR_31017  | 11.2022 | 4.8482  | -1.20826097  | 4.33E-17      | ** |
| siR_31018  | 4.0058  | 1.1934  | -1.74701271  | 4.22E-11      | ** |
| siR_31020  | 1.2407  | 0.6713  | -0.88612477  | 0.0320329     | ** |
| siR_310216 | 1.028   | 0.01    | -6.68369645  | 3.95E-09      | ** |
| siR_310225 | 1.9852  | 0.01    | -7.63314056  | 5.78E-17      | ** |

|            |          |          |              |             |    |
|------------|----------|----------|--------------|-------------|----|
| siR_310243 | 1.3825   | 0.01     | -7.1113566   | 4.95E-12    | ** |
| siR_310378 | 1.0989   | 0.01     | -6.7799163   | 1.04E-09    | ** |
| siR_31038  | 1.9852   | 1.0815   | -0.87625069  | 0.006940346 |    |
| siR_31043  | 5.4947   | 2.6479   | -1.05319208  | 1.42E-07    | ** |
| siR_310457 | 2.6233   | 0.01     | -8.035239    | 3.46E-22    | ** |
| siR_310531 | 201.0012 | 0.01     | -14.29491785 | 0           | ** |
| siR_31054  | 12.5138  | 11.9713  | -0.06394012  | 0.566619204 |    |
| siR_31056  | 26.2684  | 11.4119  | -1.20278932  | 1.05E-37    | ** |
| siR_310570 | 3.5095   | 0.01     | -8.45512172  | 1.93E-29    | ** |
| siR_31058  | 3.7931   | 2.0512   | -0.88690924  | 0.000153374 |    |
| siR_310581 | 3.9349   | 0.01     | -8.62018319  | 6.36E-33    | ** |
| siR_31063  | 2.9423   | 1.4918   | -0.97989022  | 0.000295135 |    |
| siR_310655 | 1.028    | 0.01     | -6.68369645  | 3.95E-09    | ** |
| siR_310690 | 1.2407   | 0.01     | -6.95501051  | 7.17E-11    | ** |
| siR_3108   | 0.01     | 2.2749   | 7.82965932   | 8.83E-20    | ** |
| siR_31081  | 1.0989   | 0.3356   | -1.71124549  | 0.000775199 | ** |
| siR_31085  | 0.01     | 3.2446   | 8.34189682   | 6.75E-28    | ** |
| siR_31087  | 1.2407   | 1.1188   | -0.14920216  | 0.683020116 |    |
| siR_311001 | 1.0989   | 0.01     | -6.7799163   | 1.04E-09    | ** |
| siR_31102  | 1.1344   | 0.5594   | -1.01997728  | 0.02136103  | *  |
| siR_311022 | 2.7651   | 0.01     | -8.11118786  | 2.39E-23    | ** |
| siR_31103  | 2.2688   | 0.7832   | -1.53447677  | 6.54E-06    | ** |
| siR_311033 | 1.5243   | 0.01     | -7.25200305  | 3.42E-13    | ** |
| siR_31104  | 0.01     | 1.6409   | 7.35834351   | 1.79E-14    | ** |
| siR_311061 | 16.1297  | 0.01     | -10.65550397 | 9.74E-133   | ** |
| siR_311076 | 1.5598   | 0.01     | -7.28521726  | 1.75E-13    | ** |
| siR_311105 | 2.836    | 0.01     | -8.14771372  | 6.28E-24    | ** |
| siR_31111  | 0.01     | 21.2575  | 11.05375622  | 1.11E-178   | ** |
| siR_311166 | 8.6143   | 0.01     | -9.75058979  | 3.18E-71    | ** |
| siR_311184 | 6.2392   | 0.01     | -9.28521723  | 8.77E-52    | ** |
| siR_31119  | 0.01     | 308.7186 | 14.91400479  | 0           | ** |
| siR_31120  | 0.01     | 6.974    | 9.44584255   | 4.08E-59    | ** |
| siR_31121  | 0.01     | 2.6106   | 8.02823761   | 1.37E-22    | ** |
| siR_311215 | 1.2053   | 0.01     | -6.91324847  | 1.40E-10    | ** |
| siR_31128  | 0.01     | 56.6867  | 12.46879457  | 0           | ** |
| siR_31129  | 0.01     | 2.6479   | 8.04870483   | 6.67E-23    | ** |
| siR_31130  | 0.01     | 2.536    | 7.98641094   | 5.76E-22    | ** |
| siR_31138  | 0.01     | 8.9132   | 9.79979967   | 2.39E-75    | ** |
| siR_311420 | 1.3116   | 0.01     | -7.035184    | 1.88E-11    | ** |
| siR_311457 | 1.5243   | 0.01     | -7.25200305  | 3.42E-13    | ** |
| siR_311477 | 1.2762   | 0.01     | -6.99571063  | 3.67E-11    | ** |
| siR_31149  | 40.732   | 23.7562  | -0.77785857  | 8.68E-29    |    |
| siR_311511 | 13.3292  | 0.01     | -10.38037443 | 8.15E-110   | ** |
| siR_311523 | 13.8255  | 0.01     | -10.43311603 | 7.06E-114   | ** |
| siR_311526 | 1.8079   | 0.01     | -7.49817107  | 1.63E-15    | ** |
| siR_31156  | 0.01     | 17.1925  | 10.74756363  | 1.18E-144   | ** |
| siR_311576 | 2.1979   | 0.01     | -7.77998195  | 1.05E-18    | ** |

|            |         |        |              |             |    |
|------------|---------|--------|--------------|-------------|----|
| siR_311595 | 1.737   | 0.01   | -7.44045394  | 6.21E-15    | ** |
| siR_3116   | 2.6233  | 1.1934 | -1.13630512  | 0.000116635 | ** |
| siR_311667 | 5.9201  | 0.01   | -9.2094777   | 3.58E-49    | ** |
| siR_31169  | 1.737   | 0.8205 | -1.08202252  | 0.002661787 | ** |
| siR_31171  | 3.3323  | 2.163  | -0.62348462  | 0.009053451 |    |
| siR_311721 | 14.6054 | 0.01   | -10.51228609 | 2.92E-120   | ** |
| siR_311726 | 1.4534  | 0.01   | -7.18328801  | 1.30E-12    | ** |
| siR_311731 | 4.1831  | 0.01   | -8.70842867  | 5.92E-35    | ** |
| siR_31174  | 4.4667  | 2.0885 | -1.09674222  | 9.59E-07    | ** |
| siR_311747 | 1.4534  | 0.01   | -7.18328801  | 1.30E-12    | ** |
| siR_31185  | 1.3825  | 0.7086 | -0.96423611  | 0.014998473 |    |
| siR_31188  | 1.2762  | 0.7832 | -0.70440177  | 0.074231739 |    |
| siR_311922 | 1.0989  | 0.01   | -6.7799163   | 1.04E-09    | ** |
| siR_311963 | 2.3042  | 0.01   | -7.84812212  | 1.41E-19    | ** |
| siR_31198  | 0.01    | 3.1327 | 8.29126281   | 5.83E-27    | ** |
| siR_31200  | 0.01    | 2.0885 | 7.70632333   | 3.21E-18    | ** |
| siR_31207  | 2.3751  | 1.1934 | -0.99291058  | 0.00102688  |    |
| siR_31222  | 13.79   | 8.9505 | -0.62358227  | 9.79E-08    |    |
| siR_312226 | 3.6513  | 0.01   | -8.51226639  | 1.33E-30    | ** |
| siR_312269 | 1.7725  | 0.01   | -7.46964183  | 3.18E-15    | ** |
| siR_31228  | 7.1254  | 1.268  | -2.49041626  | 1.92E-28    | ** |
| siR_31229  | 1.9497  | 0.5594 | -1.80129999  | 2.93E-06    | ** |
| siR_31230  | 9.8551  | 4.7363 | -1.05711005  | 1.45E-12    | ** |
| siR_312306 | 1.2407  | 0.01   | -6.95501051  | 7.17E-11    | ** |
| siR_312309 | 2.2688  | 0.01   | -7.82578561  | 2.76E-19    | ** |
| siR_31232  | 3.4032  | 1.0815 | -1.65385827  | 5.08E-09    | ** |
| siR_312403 | 1.028   | 0.01   | -6.68369645  | 3.95E-09    | ** |
| siR_312443 | 2.1979  | 0.01   | -7.77998195  | 1.05E-18    | ** |
| siR_312469 | 1.7725  | 0.01   | -7.46964183  | 3.18E-15    | ** |
| siR_312510 | 2.6942  | 0.01   | -8.07371315  | 9.10E-23    | ** |
| siR_312563 | 1.4889  | 0.01   | -7.21810305  | 6.67E-13    | ** |
| siR_312658 | 2.127   | 0.01   | -7.73267621  | 3.99E-18    | ** |
| siR_312709 | 5.5656  | 0.01   | -9.12039339  | 2.86E-46    | ** |
| siR_31271  | 3.4741  | 1.2307 | -1.49716015  | 3.93E-08    | ** |
| siR_312710 | 3.5804  | 0.01   | -8.48397698  | 5.07E-30    | ** |
| siR_312712 | 1.6661  | 0.01   | -7.38033118  | 2.36E-14    | ** |
| siR_312719 | 1.418   | 0.01   | -7.14771372  | 2.54E-12    | ** |
| siR_31273  | 2.8005  | 0.5221 | -2.42328636  | 1.11E-11    | ** |
| siR_312748 | 3.0487  | 0.01   | -8.25205038  | 1.14E-25    | ** |
| siR_31275  | 12.1239 | 4.8109 | -1.33347514  | 3.67E-21    | ** |
| siR_312777 | 3.6159  | 0.01   | -8.49821097  | 2.60E-30    | ** |
| siR_312778 | 1.9143  | 0.01   | -7.58067313  | 2.20E-16    | ** |
| siR_312795 | 3.3677  | 0.01   | -8.39561983  | 2.79E-28    | ** |
| siR_312830 | 1.3116  | 0.01   | -7.035184    | 1.88E-11    | ** |
| siR_312869 | 2.1624  | 0.01   | -7.75648961  | 2.05E-18    | ** |
| siR_312895 | 2.446   | 0.01   | -7.93428061  | 9.77E-21    | ** |
| siR_312920 | 3.6159  | 0.01   | -8.49821097  | 2.60E-30    | ** |

|            |         |         |              |             |    |
|------------|---------|---------|--------------|-------------|----|
| siR_312927 | 6.4164  | 0.01    | -9.3256203   | 3.11E-53    | ** |
| siR_312972 | 1.9497  | 0.01    | -7.60710834  | 1.13E-16    | ** |
| siR_3130   | 0.01    | 1.7155  | 7.42248532   | 4.25E-15    | ** |
| siR_313035 | 1.5243  | 0.01    | -7.25200305  | 3.42E-13    | ** |
| siR_313036 | 1.2407  | 0.01    | -6.95501051  | 7.17E-11    | ** |
| siR_31304  | 0.01    | 1.529   | 7.2564446    | 1.55E-13    | ** |
| siR_31317  | 16.6615 | 10.2185 | -0.70533485  | 6.37E-11    |    |
| siR_313181 | 1.3471  | 0.01    | -7.07371314  | 9.66E-12    | ** |
| siR_31321  | 4.1122  | 2.4987  | -0.71873273  | 0.001000216 |    |
| siR_313282 | 22.8298 | 0.01    | -11.15670246 | 1.41E-187   | ** |
| siR_313334 | 9.8551  | 0.01    | -9.94472677  | 2.22E-81    | ** |
| siR_313340 | 6.0619  | 0.01    | -9.24362624  | 2.48E-50    | ** |
| siR_313344 | 2.3042  | 0.01    | -7.84812212  | 1.41E-19    | ** |
| siR_313360 | 1.0989  | 0.01    | -6.7799163   | 1.04E-09    | ** |
| siR_313375 | 2.9423  | 0.01    | -8.20080054  | 8.47E-25    | ** |
| siR_31338  | 7.7281  | 6.7875  | -0.18723347  | 0.196691403 |    |
| siR_313434 | 1.7725  | 0.01    | -7.46964183  | 3.18E-15    | ** |
| siR_31350  | 13.1874 | 3.7294  | -1.82214471  | 4.08E-35    | ** |
| siR_31353  | 1.028   | 0.4102  | -1.32544087  | 0.007079856 | ** |
| siR_313535 | 1.6307  | 0.01    | -7.34934759  | 4.61E-14    | ** |
| siR_313536 | 1.0635  | 0.01    | -6.73267622  | 2.02E-09    | ** |
| siR_31354  | 1.3825  | 0.4848  | -1.51181788  | 0.000534972 | ** |
| siR_313620 | 1.8079  | 0.01    | -7.49817107  | 1.63E-15    | ** |
| siR_31365  | 0.01    | 3.7294  | 8.54279973   | 5.90E-32    | ** |
| siR_31368  | 2.4106  | 0.9323  | -1.37052611  | 1.93E-05    | ** |
| siR_313688 | 3.864   | 0.01    | -8.59395129  | 2.42E-32    | ** |
| siR_31371  | 32.8976 | 16.0364 | -1.03663203  | 3.37E-37    | ** |
| siR_313714 | 2.0561  | 0.01    | -7.68376661  | 1.52E-17    | ** |
| siR_31372  | 1.1344  | 0.5967  | -0.92685176  | 0.033495577 |    |
| siR_313731 | 1.0635  | 0.01    | -6.73267622  | 2.02E-09    | ** |
| siR_313773 | 1.1344  | 0.01    | -6.82578563  | 5.32E-10    | ** |
| siR_3138   | 0.01    | 1.4918  | 7.22091032   | 3.17E-13    | ** |
| siR_313884 | 1.1344  | 0.01    | -6.82578563  | 5.32E-10    | ** |
| siR_3139   | 0.01    | 1.3053  | 7.02823761   | 1.15E-11    | ** |
| siR_313957 | 1.1698  | 0.01    | -6.87011809  | 2.73E-10    | ** |
| siR_313960 | 1.5243  | 0.01    | -7.25200305  | 3.42E-13    | ** |
| siR_31402  | 1.1344  | 0.1492  | -2.92661     | 2.25E-06    | ** |
| siR_31405  | 6.1328  | 4.065   | -0.59329055  | 0.000686371 |    |
| siR_314128 | 1.3825  | 0.01    | -7.11113566  | 4.95E-12    | ** |
| siR_314256 | 2.0561  | 0.01    | -7.68376661  | 1.52E-17    | ** |
| siR_31431  | 7.3027  | 2.2003  | -1.73072972  | 7.47E-19    | ** |
| siR_314331 | 2.4106  | 0.01    | -7.91324847  | 1.91E-20    | ** |
| siR_314332 | 1.8788  | 0.01    | -7.55366769  | 4.29E-16    | ** |
| siR_31434  | 1.3471  | 0.6713  | -1.0048274   | 0.013015658 | *  |
| siR_314481 | 1.2762  | 0.01    | -6.99571063  | 3.67E-11    | ** |
| siR_31450  | 1.0989  | 0.2984  | -1.88074067  | 0.000335467 | ** |
| siR_314508 | 1.0989  | 0.01    | -6.7799163   | 1.04E-09    | ** |

|            |           |           |               |              |    |
|------------|-----------|-----------|---------------|--------------|----|
| siR_314529 | 1. 5952   | 0. 01     | -7. 31759351  | 8. 99E-14    | ** |
| siR_31453  | 1. 5598   | 1. 0069   | -0. 63144065  | 0. 072523267 |    |
| siR_31461  | 1. 8079   | 1. 1561   | -0. 64504869  | 0. 048445034 |    |
| siR_314621 | 3. 3323   | 0. 01     | -8. 38037447  | 5. 44E-28    | ** |
| siR_314701 | 2. 0206   | 0. 01     | -7. 65863995  | 2. 96E-17    | ** |
| siR_31487  | 1. 0635   | 0. 4475   | -1. 24886045  | 0. 008857046 | ** |
| siR_314895 | 13. 8255  | 0. 01     | -10. 43311603 | 7. 06E-114   | ** |
| siR_314896 | 2. 7651   | 0. 01     | -8. 11118786  | 2. 39E-23    | ** |
| siR_314903 | 2. 3042   | 0. 01     | -7. 84812212  | 1. 41E-19    | ** |
| siR_314934 | 2. 9069   | 0. 01     | -8. 18333764  | 1. 65E-24    | ** |
| siR_314983 | 4. 8921   | 0. 01     | -8. 93431011  | 9. 31E-41    | ** |
| siR_315006 | 1. 3116   | 0. 01     | -7. 035184    | 1. 88E-11    | ** |
| siR_31504  | 0. 01     | 2. 4241   | 7. 9213054    | 4. 98E-21    | ** |
| siR_315058 | 1. 2407   | 0. 01     | -6. 95501051  | 7. 17E-11    | ** |
| siR_31507  | 0. 01     | 1. 9766   | 7. 62687714   | 2. 78E-17    | ** |
| siR_315081 | 4. 1476   | 0. 01     | -8. 69613295  | 1. 15E-34    | ** |
| siR_315084 | 1. 7725   | 0. 01     | -7. 46964183  | 3. 18E-15    | ** |
| siR_315184 | 3. 155    | 0. 01     | -8. 3014962   | 1. 54E-26    | ** |
| siR_3152   | 6. 0619   | 2. 7225   | -1. 154838    | 2. 58E-09    | ** |
| siR_315273 | 13. 1519  | 0. 01     | -10. 36105555 | 2. 30E-108   | ** |
| siR_315278 | 17. 6895  | 0. 01     | -10. 78867756 | 1. 67E-145   | ** |
| siR_315279 | 1. 2053   | 0. 01     | -6. 91324847  | 1. 40E-10    | ** |
| siR_315283 | 2. 5169   | 0. 01     | -7. 97550407  | 2. 57E-21    | ** |
| siR_315305 | 1. 1344   | 0. 01     | -6. 82578563  | 5. 32E-10    | ** |
| siR_315325 | 1. 1344   | 0. 01     | -6. 82578563  | 5. 32E-10    | ** |
| siR_315329 | 1. 4889   | 0. 01     | -7. 21810305  | 6. 67E-13    | ** |
| siR_3154   | 1. 2053   | 0. 1492   | -3. 01407284  | 7. 31E-07    | ** |
| siR_31559  | 3. 4386   | 4. 6617   | 0. 43903486   | 0. 024108098 |    |
| siR_315678 | 1. 028    | 0. 01     | -6. 68369645  | 3. 95E-09    | ** |
| siR_31573  | 6. 7      | 5. 3703   | -0. 31915841  | 0. 045222134 |    |
| siR_315731 | 1. 6661   | 0. 01     | -7. 38033118  | 2. 36E-14    | ** |
| siR_31576  | 2. 3397   | 1. 6036   | -0. 54500923  | 0. 053116145 |    |
| siR_315762 | 2. 5878   | 0. 01     | -8. 0155823   | 6. 75E-22    | ** |
| siR_315786 | 6. 7709   | 0. 01     | -9. 40320384  | 3. 90E-56    | ** |
| siR_315808 | 1. 3471   | 0. 01     | -7. 07371314  | 9. 66E-12    | ** |
| siR_31588  | 0. 01     | 1. 0442   | 6. 70625425   | 1. 77E-09    | ** |
| siR_315919 | 1. 0635   | 0. 01     | -6. 73267622  | 2. 02E-09    | ** |
| siR_315982 | 3. 6159   | 0. 01     | -8. 49821097  | 2. 60E-30    | ** |
| siR_3160   | 8. 3307   | 2. 797    | -1. 57455747  | 8. 29E-19    | ** |
| siR_316033 | 2. 7651   | 0. 01     | -8. 11118786  | 2. 39E-23    | ** |
| siR_31606  | 0. 01     | 2. 536    | 7. 98641094   | 5. 76E-22    | ** |
| siR_316092 | 2. 3042   | 0. 01     | -7. 84812212  | 1. 41E-19    | ** |
| siR_316103 | 3. 7577   | 0. 01     | -8. 5537061   | 1. 79E-31    | ** |
| siR_31616  | 511. 4719 | 207. 5031 | -1. 30152209  | 0            | ** |
| siR_31617  | 11. 1667  | 5. 3703   | -1. 05612831  | 5. 03E-14    | ** |
| siR_31618  | 3. 2968   | 3. 9159   | 0. 24827755   | 0. 226824806 |    |
| siR_316187 | 3. 545    | 0. 01     | -8. 4696418   | 9. 89E-30    | ** |



|            |         |         |              |             |    |
|------------|---------|---------|--------------|-------------|----|
| siR_31619  | 1.9143  | 1.6782  | -0.18990228  | 0.518337304 |    |
| siR_31620  | 3.5804  | 1.4172  | -1.3370774   | 3.00E-07    | ** |
| siR_31623  | 19.3911 | 11.3746 | -0.76957883  | 2.80E-14    |    |
| siR_316291 | 32.6494 | 0.01    | -11.67284096 | 5.95E-268   | ** |
| siR_316341 | 2.5878  | 0.01    | -8.0155823   | 6.75E-22    | ** |
| siR_316352 | 1.3116  | 0.01    | -7.035184    | 1.88E-11    | ** |
| siR_316363 | 1.6661  | 0.01    | -7.38033118  | 2.36E-14    | ** |
| siR_316400 | 1.737   | 0.01    | -7.44045394  | 6.21E-15    | ** |
| siR_316457 | 3.1196  | 0.01    | -8.28521723  | 3.00E-26    | ** |
| siR_31646  | 1.2407  | 0.1492  | -3.05583488  | 4.15E-07    | ** |
| siR_31656  | 2.3751  | 0.4848  | -2.29252665  | 1.51E-09    | ** |
| siR_316648 | 1.0635  | 0.01    | -6.73267622  | 2.02E-09    | ** |
| siR_316699 | 1.3116  | 0.01    | -7.035184    | 1.88E-11    | ** |
| siR_316757 | 4.7148  | 0.01    | -8.88105279  | 2.63E-39    | ** |
| siR_316838 | 1.1698  | 0.01    | -6.87011809  | 2.73E-10    | ** |
| siR_316850 | 2.6942  | 0.01    | -8.07371315  | 9.10E-23    | ** |
| siR_316864 | 1.0989  | 0.01    | -6.7799163   | 1.04E-09    | ** |
| siR_316895 | 2.1979  | 0.01    | -7.77998195  | 1.05E-18    | ** |
| siR_316899 | 1.1344  | 0.01    | -6.82578563  | 5.32E-10    | ** |
| siR_316901 | 1.418   | 0.01    | -7.14771372  | 2.54E-12    | ** |
| siR_316971 | 2.6587  | 0.01    | -8.05457718  | 1.77E-22    | ** |
| siR_317009 | 11.5567 | 0.01    | -10.17451381 | 2.63E-95    | ** |
| siR_31701  | 95.8567 | 41.9556 | -1.19201589  | 5.14E-131   | ** |
| siR_317013 | 1.2053  | 0.01    | -6.91324847  | 1.40E-10    | ** |
| siR_317016 | 5.2111  | 0.01    | -9.02544416  | 2.28E-43    | ** |
| siR_317020 | 20.2419 | 0.01    | -10.98312891 | 2.14E-166   | ** |
| siR_317021 | 1.7016  | 0.01    | -7.41074813  | 1.21E-14    | ** |
| siR_317040 | 12.4075 | 0.01    | -10.2769968  | 2.85E-102   | ** |
| siR_317058 | 1.2762  | 0.01    | -6.99571063  | 3.67E-11    | ** |
| siR_31707  | 6.2746  | 2.3495  | -1.41716972  | 1.21E-12    | ** |
| siR_317072 | 6.0619  | 0.01    | -9.24362624  | 2.48E-50    | ** |
| siR_317080 | 1.418   | 0.01    | -7.14771372  | 2.54E-12    | ** |
| siR_31709  | 1.028   | 0.3356  | -1.61502564  | 0.001825058 | ** |
| siR_317099 | 1.9497  | 0.01    | -7.60710834  | 1.13E-16    | ** |
| siR_31713  | 3.0132  | 1.6409  | -0.87680911  | 0.000845317 |    |
| siR_317181 | 2.2333  | 0.01    | -7.80303324  | 5.38E-19    | ** |
| siR_317187 | 6.4519  | 0.01    | -9.33358029  | 1.59E-53    | ** |
| siR_31739  | 5.2466  | 1.7901  | -1.55134262  | 3.83E-12    | ** |
| siR_317417 | 2.127   | 0.01    | -7.73267621  | 3.99E-18    | ** |
| siR_317419 | 1.028   | 0.01    | -6.68369645  | 3.95E-09    | ** |
| siR_31750  | 6.1328  | 1.9393  | -1.6610099   | 3.02E-15    | ** |
| siR_317505 | 2.6587  | 0.01    | -8.05457718  | 1.77E-22    | ** |
| siR_31752  | 4.1122  | 1.4545  | -1.49938714  | 2.11E-09    | ** |
| siR_317582 | 1.0989  | 0.01    | -6.7799163   | 1.04E-09    | ** |
| siR_317596 | 10.8831 | 0.01    | -10.08787391 | 8.55E-90    | ** |
| siR_317684 | 2.0915  | 0.01    | -7.70839418  | 7.79E-18    | ** |
| siR_31777  | 2.0561  | 0.8205  | -1.32533519  | 0.000122068 | ** |

|            |         |         |              |             |    |
|------------|---------|---------|--------------|-------------|----|
| siR_317784 | 4.9984  | 0.01    | -8.96532255  | 1.25E-41    | ** |
| siR_317792 | 4.3958  | 0.01    | -8.77998192  | 1.07E-36    | ** |
| siR_317968 | 8.2244  | 0.01    | -9.68376659  | 4.94E-68    | ** |
| siR_31797  | 14.5699 | 4.8109  | -1.59861226  | 2.07E-32    | ** |
| siR_31799  | 1.2407  | 0.4848  | -1.35569271  | 0.002535804 | ** |
| siR_317992 | 1.1344  | 0.01    | -6.82578563  | 5.32E-10    | ** |
| siR_318020 | 1.1698  | 0.01    | -6.87011809  | 2.73E-10    | ** |
| siR_318030 | 1.8434  | 0.01    | -7.52622535  | 8.37E-16    | ** |
| siR_318041 | 8.8979  | 0.01    | -9.79732106  | 1.52E-73    | ** |
| siR_31805  | 1.6307  | 0.5221  | -1.64309333  | 6.28E-05    | ** |
| siR_318111 | 2.2333  | 0.01    | -7.80303324  | 5.38E-19    | ** |
| siR_31817  | 1.418   | 1.3799  | -0.03929381  | 0.908620659 |    |
| siR_318197 | 1.4889  | 0.01    | -7.21810305  | 6.67E-13    | ** |
| siR_3182   | 17.1578 | 7.9063  | -1.11778998  | 1.37E-22    | ** |
| siR_318359 | 1.5598  | 0.01    | -7.28521726  | 1.75E-13    | ** |
| siR_318382 | 4.9984  | 0.01    | -8.96532255  | 1.25E-41    | ** |
| siR_318386 | 1.6661  | 0.01    | -7.38033118  | 2.36E-14    | ** |
| siR_3184   | 1.9497  | 0.8951  | -1.12313138  | 0.001024698 | ** |
| siR_31842  | 27.6864 | 13.5377 | -1.03219482  | 2.33E-31    | ** |
| siR_31846  | 0.9217  | 2.3122  | 1.32689704   | 4.06E-05    | ** |
| siR_31848  | 0.4608  | 1.6782  | 1.86470204   | 8.01E-06    | ** |
| siR_318480 | 1.418   | 0.01    | -7.14771372  | 2.54E-12    | ** |
| siR_318547 | 1.028   | 0.01    | -6.68369645  | 3.95E-09    | ** |
| siR_318634 | 1.4889  | 0.01    | -7.21810305  | 6.67E-13    | ** |
| siR_318649 | 1.0635  | 0.01    | -6.73267622  | 2.02E-09    | ** |
| siR_318663 | 1.2762  | 0.01    | -6.99571063  | 3.67E-11    | ** |
| siR_318682 | 1.7725  | 0.01    | -7.46964183  | 3.18E-15    | ** |
| siR_318706 | 3.4386  | 0.01    | -8.42567749  | 7.34E-29    | ** |
| siR_318710 | 28.8917 | 0.01    | -11.49643924 | 3.40E-237   | ** |
| siR_318772 | 1.2407  | 0.01    | -6.95501051  | 7.17E-11    | ** |
| siR_31879  | 4.6085  | 4.9974  | 0.11688045   | 0.510061438 |    |
| siR_318800 | 1.4534  | 0.01    | -7.18328801  | 1.30E-12    | ** |
| siR_31881  | 3.155   | 1.902   | -0.73012276  | 0.003516301 |    |
| siR_318827 | 1.0635  | 0.01    | -6.73267622  | 2.02E-09    | ** |
| siR_318853 | 4.963   | 0.01    | -8.95506867  | 2.45E-41    | ** |
| siR_318867 | 1.0635  | 0.01    | -6.73267622  | 2.02E-09    | ** |
| siR_318888 | 1.4889  | 0.01    | -7.21810305  | 6.67E-13    | ** |
| siR_318894 | 1.0989  | 0.01    | -6.7799163   | 1.04E-09    | ** |
| siR_318902 | 23.3615 | 0.01    | -11.18991721 | 6.26E-192   | ** |
| siR_318906 | 13.8609 | 0.01    | -10.43680517 | 3.62E-114   | ** |
| siR_31895  | 0.01    | 1.7155  | 7.42248532   | 4.25E-15    | ** |
| siR_318967 | 3.8286  | 0.01    | -8.58067313  | 4.72E-32    | ** |
| siR_318975 | 1.7725  | 0.01    | -7.46964183  | 3.18E-15    | ** |
| siR_31901  | 0.01    | 1.529   | 7.2564446    | 1.55E-13    | ** |
| siR_319042 | 25.0986 | 0.01    | -11.29339117 | 3.79E-206   | ** |
| siR_319051 | 1.737   | 0.01    | -7.44045394  | 6.21E-15    | ** |
| siR_319058 | 1.737   | 0.01    | -7.44045394  | 6.21E-15    | ** |

|            |          |         |              |             |    |
|------------|----------|---------|--------------|-------------|----|
| siR_31906  | 0.01     | 1.0815  | 6.75688986   | 8.62E-10    | ** |
| siR_319081 | 4.0413   | 0.01    | -8.65867564  | 8.57E-34    | ** |
| siR_319116 | 1.3116   | 0.01    | -7.035184    | 1.88E-11    | ** |
| siR_319146 | 2.2333   | 0.01    | -7.80303324  | 5.38E-19    | ** |
| siR_319233 | 1.2053   | 0.01    | -6.91324847  | 1.40E-10    | ** |
| siR_31925  | 0.01     | 1.6782  | 7.39077085   | 8.72E-15    | ** |
| siR_319288 | 5.2466   | 0.01    | -9.03523897  | 1.17E-43    | ** |
| siR_319305 | 1.8788   | 0.01    | -7.55366769  | 4.29E-16    | ** |
| siR_319363 | 3.3677   | 0.01    | -8.39561983  | 2.79E-28    | ** |
| siR_319403 | 3.2968   | 0.01    | -8.36492254  | 1.06E-27    | ** |
| siR_319416 | 1.4889   | 0.01    | -7.21810305  | 6.67E-13    | ** |
| siR_319671 | 2.4106   | 0.01    | -7.91324847  | 1.91E-20    | ** |
| siR_319672 | 17.4059  | 0.01    | -10.76536079 | 3.49E-143   | ** |
| siR_319675 | 23.007   | 0.01    | -11.16785724 | 4.99E-189   | ** |
| siR_319678 | 2.5524   | 0.01    | -7.99571063  | 1.32E-21    | ** |
| siR_319694 | 122.5859 | 0.01    | -13.58150455 | 0           | ** |
| siR_319695 | 7.2672   | 0.01    | -9.5052558   | 3.38E-60    | ** |
| siR_319741 | 1.028    | 0.01    | -6.68369645  | 3.95E-09    | ** |
| siR_319757 | 6.5582   | 0.01    | -9.35715612  | 2.15E-54    | ** |
| siR_319773 | 1.8079   | 0.01    | -7.49817107  | 1.63E-15    | ** |
| siR_319830 | 1.0635   | 0.01    | -6.73267622  | 2.02E-09    | ** |
| siR_319833 | 1.5952   | 0.01    | -7.31759351  | 8.99E-14    | ** |
| siR_319835 | 1.2762   | 0.01    | -6.99571063  | 3.67E-11    | ** |
| siR_319909 | 1.6307   | 0.01    | -7.34934759  | 4.61E-14    | ** |
| siR_319911 | 3.3677   | 0.01    | -8.39561983  | 2.79E-28    | ** |
| siR_319914 | 1.737    | 0.01    | -7.44045394  | 6.21E-15    | ** |
| siR_319915 | 2.836    | 0.01    | -8.14771372  | 6.28E-24    | ** |
| siR_319928 | 3.0841   | 0.01    | -8.26870574  | 5.85E-26    | ** |
| siR_319934 | 3.0841   | 0.01    | -8.26870574  | 5.85E-26    | ** |
| siR_319948 | 2.5878   | 0.01    | -8.0155823   | 6.75E-22    | ** |
| siR_319991 | 1.737    | 0.01    | -7.44045394  | 6.21E-15    | ** |
| siR_32     | 1.2053   | 0.1865  | -2.69214474  | 2.94E-06    | ** |
| siR_32002  | 0.01     | 1.0069  | 6.6537766    | 3.63E-09    | ** |
| siR_320048 | 1.1344   | 0.01    | -6.82578563  | 5.32E-10    | ** |
| siR_320165 | 1.6307   | 0.01    | -7.34934759  | 4.61E-14    | ** |
| siR_32017  | 4.8212   | 4.2142  | -0.19413349  | 0.291747294 |    |
| siR_320310 | 35.3436  | 0.01    | -11.78723306 | 5.28E-290   | ** |
| siR_320339 | 1.7725   | 0.01    | -7.46964183  | 3.18E-15    | ** |
| siR_320392 | 1.028    | 0.01    | -6.68369645  | 3.95E-09    | ** |
| siR_320398 | 2.9069   | 0.01    | -8.18333764  | 1.65E-24    | ** |
| siR_320408 | 1.3825   | 0.01    | -7.11113566  | 4.95E-12    | ** |
| siR_320409 | 1.2407   | 0.01    | -6.95501051  | 7.17E-11    | ** |
| siR_32042  | 30.1679  | 18.4605 | -0.70857264  | 1.02E-18    |    |
| siR_32043  | 1.0989   | 0.8578  | -0.35734689  | 0.373215383 |    |
| siR_320445 | 3.6159   | 0.01    | -8.49821097  | 2.60E-30    | ** |
| siR_32045  | 35.6627  | 25.3225 | -0.49399609  | 3.62E-12    |    |
| siR_32046  | 0.01     | 2.3495  | 7.87620996   | 2.10E-20    | ** |

|            |         |         |              |               |    |
|------------|---------|---------|--------------|---------------|----|
| siR_320502 | 1.3825  | 0.01    | -7.11113566  | 4.95E-12      | ** |
| siR_32052  | 3.4032  | 0.9696  | -1.81143033  | 4.72E-10      | ** |
| siR_32053  | 2.0561  | 0.8951  | -1.19978966  | 0.0003772     | ** |
| siR_320557 | 2.7296  | 0.01    | -8.09254576  | 4.66E-23      | ** |
| siR_320559 | 3.4741  | 0.01    | -8.44049549  | 3.76E-29      | ** |
| siR_320607 | 2.6942  | 0.01    | -8.07371315  | 9.10E-23      | ** |
| siR_320608 | 1.5598  | 0.01    | -7.28521726  | 1.75E-13      | ** |
| siR_32064  | 3.0841  | 1.8647  | -0.725906    | 0.004095746   |    |
| siR_32078  | 1.028   | 0.0373  | -4.78452082  | 6.17E-08      | ** |
| siR_32079  | 6.2392  | 1.3799  | -2.17679734  | 1.41E-21      | ** |
| siR_320822 | 1.7016  | 0.01    | -7.41074813  | 1.21E-14      | ** |
| siR_320823 | 1.3825  | 0.01    | -7.11113566  | 4.95E-12      | ** |
| siR_320827 | 2.6587  | 0.01    | -8.05457718  | 1.77E-22      | ** |
| siR_320828 | 2.127   | 0.01    | -7.73267621  | 3.99E-18      | ** |
| siR_320907 | 12.2657 | 0.01    | -10.26041392 | 4.13E-101     | ** |
| siR_320988 | 4.6794  | 0.01    | -8.87017976  | 5.13E-39      | ** |
| siR_320992 | 34.9537 | 0.01    | -11.77122969 | 8.21E-287     | ** |
| siR_320993 | 3.7577  | 0.01    | -8.5537061   | 1.79E-31      | ** |
| siR_320996 | 5.282   | 0.01    | -9.04494046  | 5.99E-44      | ** |
| siR_321014 | 1.8079  | 0.01    | -7.49817107  | 1.63E-15      | ** |
| siR_321023 | 1.0989  | 0.01    | -6.7799163   | 1.04E-09      | ** |
| siR_321088 | 1.0989  | 0.01    | -6.7799163   | 1.04E-09      | ** |
| siR_3211   | 5.991   | 9.0997  | 0.60302215   | 2.55E-05      |    |
| siR_321105 | 2.9423  | 0.01    | -8.20080054  | 8.47E-25      | ** |
| siR_321131 | 7.5154  | 0.01    | -9.55370604  | 3.14E-62      | ** |
| siR_321132 | 1.0989  | 0.01    | -6.7799163   | 1.04E-09      | ** |
| siR_321133 | 1.0989  | 0.01    | -6.7799163   | 1.04E-09      | ** |
| siR_321210 | 7.3736  | 0.01    | -9.5262254   | 4.55E-61      | ** |
| siR_321211 | 4.4312  | 0.01    | -8.79155366  | 5.51E-37      | ** |
| siR_321212 | 1.5952  | 0.01    | -7.31759351  | 8.99E-14      | ** |
| siR_321281 | 28.2182 | 0.01    | -11.46241031 | 1.11E-231     | ** |
| siR_3214   | 59.875  | 27.8958 | -1.10190583  | 5.22E-73      | ** |
| siR_321421 | 1.1344  | 0.01    | -6.82578563  | 5.32E-10      | ** |
| siR_32143  | 0.01    | 4.9974  | 8.96503389   | 1.43E-42      | ** |
| siR_321464 | 2.3751  | 0.01    | -7.89184446  | 3.72E-20      | ** |
| siR_321487 | 2.3042  | 0.01    | -7.84812212  | 1.41E-19      | ** |
| siR_321490 | 38.3923 | 0.01    | -11.90660125 | 489263864362e | ** |
| siR_321491 | 12.1239 | 0.01    | -10.24363814 | 5.98E-100     | ** |
| siR_321492 | 3.545   | 0.01    | -8.4696418   | 9.89E-30      | ** |
| siR_321493 | 2.6942  | 0.01    | -8.07371315  | 9.10E-23      | ** |
| siR_321494 | 1.7725  | 0.01    | -7.46964183  | 3.18E-15      | ** |
| siR_321495 | 1.3116  | 0.01    | -7.035184    | 1.88E-11      | ** |
| siR_3215   | 1.9497  | 1.1934  | -0.70817447  | 0.025965659   |    |
| siR_321508 | 5.0693  | 0.01    | -8.98564277  | 3.30E-42      | ** |
| siR_321519 | 13.0101 | 0.01    | -10.34541634 | 3.33E-107     | ** |
| siR_321520 | 1.1344  | 0.01    | -6.82578563  | 5.32E-10      | ** |
| siR_321521 | 1.0989  | 0.01    | -6.7799163   | 1.04E-09      | ** |

|            |         |        |              |             |    |
|------------|---------|--------|--------------|-------------|----|
| siR_321526 | 8.1535  | 0.01   | -9.67127563  | 1.88E-67    | ** |
| siR_321527 | 6.0619  | 0.01   | -9.24362624  | 2.48E-50    | ** |
| siR_321528 | 1.8434  | 0.01   | -7.52622535  | 8.37E-16    | ** |
| siR_321529 | 1.5598  | 0.01   | -7.28521726  | 1.75E-13    | ** |
| siR_321530 | 1.0635  | 0.01   | -6.73267622  | 2.02E-09    | ** |
| siR_321538 | 1.1698  | 0.01   | -6.87011809  | 2.73E-10    | ** |
| siR_321539 | 1.028   | 0.01   | -6.68369645  | 3.95E-09    | ** |
| siR_321592 | 3.7931  | 0.01   | -8.56723361  | 9.20E-32    | ** |
| siR_321629 | 2.6942  | 0.01   | -8.07371315  | 9.10E-23    | ** |
| siR_321631 | 1.3116  | 0.01   | -7.035184    | 1.88E-11    | ** |
| siR_321677 | 3.6159  | 0.01   | -8.49821097  | 2.60E-30    | ** |
| siR_321682 | 1.8434  | 0.01   | -7.52622535  | 8.37E-16    | ** |
| siR_321757 | 1.4534  | 0.01   | -7.18328801  | 1.30E-12    | ** |
| siR_321811 | 40.0939 | 0.01   | -11.96916704 | 0           | ** |
| siR_321816 | 1.418   | 0.01   | -7.14771372  | 2.54E-12    | ** |
| siR_321877 | 1.2762  | 0.01   | -6.99571063  | 3.67E-11    | ** |
| siR_321956 | 1.2053  | 0.01   | -6.91324847  | 1.40E-10    | ** |
| siR_321962 | 1.028   | 0.01   | -6.68369645  | 3.95E-09    | ** |
| siR_322001 | 9.1815  | 0.01   | -9.842586    | 7.24E-76    | ** |
| siR_322019 | 1.7016  | 0.01   | -7.41074813  | 1.21E-14    | ** |
| siR_322036 | 2.446   | 0.01   | -7.93428061  | 9.77E-21    | ** |
| siR_322053 | 1.7725  | 0.01   | -7.46964183  | 3.18E-15    | ** |
| siR_322079 | 1.8788  | 0.01   | -7.55366769  | 4.29E-16    | ** |
| siR_322085 | 3.5095  | 0.01   | -8.45512172  | 1.93E-29    | ** |
| siR_32209  | 1.6307  | 0.1119 | -3.86520945  | 1.12E-10    | ** |
| siR_322156 | 3.155   | 0.01   | -8.3014962   | 1.54E-26    | ** |
| siR_322185 | 1.028   | 0.01   | -6.68369645  | 3.95E-09    | ** |
| siR_322247 | 1.8434  | 0.01   | -7.52622535  | 8.37E-16    | ** |
| siR_322265 | 1.418   | 0.01   | -7.14771372  | 2.54E-12    | ** |
| siR_322304 | 3.5804  | 0.01   | -8.48397698  | 5.07E-30    | ** |
| siR_32233  | 0.01    | 5.7805 | 9.17505048   | 3.99E-49    | ** |
| siR_322342 | 2.1624  | 0.01   | -7.75648961  | 2.05E-18    | ** |
| siR_322398 | 3.0132  | 0.01   | -8.23515263  | 2.23E-25    | ** |
| siR_322441 | 1.4534  | 0.01   | -7.18328801  | 1.30E-12    | ** |
| siR_322477 | 4.4667  | 0.01   | -8.80306553  | 2.82E-37    | ** |
| siR_322521 | 2.5169  | 0.01   | -7.97550407  | 2.57E-21    | ** |
| siR_322620 | 3.8286  | 0.01   | -8.58067313  | 4.72E-32    | ** |
| siR_322624 | 12.3011 | 0.01   | -10.26457167 | 2.12E-101   | ** |
| siR_322634 | 3.7931  | 0.01   | -8.56723361  | 9.20E-32    | ** |
| siR_322643 | 1.5952  | 0.01   | -7.31759351  | 8.99E-14    | ** |
| siR_322757 | 1.8434  | 0.01   | -7.52622535  | 8.37E-16    | ** |
| siR_322794 | 3.7222  | 0.01   | -8.54001177  | 3.50E-31    | ** |
| siR_322796 | 1.3825  | 0.01   | -7.11113566  | 4.95E-12    | ** |
| siR_32291  | 2.5878  | 1.3426 | -0.94669657  | 0.000980749 |    |
| siR_322997 | 2.0206  | 0.01   | -7.65863995  | 2.96E-17    | ** |
| siR_323012 | 7.3381  | 0.01   | -9.51926273  | 8.87E-61    | ** |
| siR_32303  | 2.3397  | 0.8951 | -1.38620278  | 2.18E-05    | ** |

|            |           |           |              |             |    |
|------------|-----------|-----------|--------------|-------------|----|
| siR_323066 | 13.081    | 0.01      | -10.35325721 | 8.76E-108   | ** |
| siR_323116 | 3.1905    | 0.01      | -8.31763871  | 7.88E-27    | ** |
| siR_323148 | 1.737     | 0.01      | -7.44045394  | 6.21E-15    | ** |
| siR_323163 | 5.4947    | 0.01      | -9.10189688  | 1.09E-45    | ** |
| siR_32321  | 18.2567   | 12.568    | -0.53867093  | 7.50E-08    |    |
| siR_323233 | 1.0989    | 0.01      | -6.7799163   | 1.04E-09    | ** |
| siR_323243 | 29.8134   | 0.01      | -11.54174539 | 9.71E-245   | ** |
| siR_323355 | 1.4889    | 0.01      | -7.21810305  | 6.67E-13    | ** |
| siR_32337  | 0.01      | 7.0112    | 9.45351758   | 1.99E-59    | ** |
| siR_323389 | 2.7296    | 0.01      | -8.09254576  | 4.66E-23    | ** |
| siR_32339  | 0.01      | 5.1838    | 9.01786625   | 3.94E-44    | ** |
| siR_32340  | 0.01      | 1.6409    | 7.35834351   | 1.79E-14    | ** |
| siR_32341  | 0.01      | 1.0815    | 6.75688986   | 8.62E-10    | ** |
| siR_323462 | 1.1344    | 0.01      | -6.82578563  | 5.32E-10    | ** |
| siR_323530 | 1.3471    | 0.01      | -7.07371314  | 9.66E-12    | ** |
| siR_323587 | 1.3471    | 0.01      | -7.07371314  | 9.66E-12    | ** |
| siR_323667 | 11.6276   | 0.01      | -10.18333764 | 6.90E-96    | ** |
| siR_323771 | 1.0989    | 0.01      | -6.7799163   | 1.04E-09    | ** |
| siR_323788 | 1.3825    | 0.01      | -7.11113566  | 4.95E-12    | ** |
| siR_32379  | 0.01      | 1.7528    | 7.45351758   | 2.07E-15    | ** |
| siR_323794 | 6.4164    | 0.01      | -9.3256203   | 3.11E-53    | ** |
| siR_323847 | 7.3736    | 0.01      | -9.5262254   | 4.55E-61    | ** |
| siR_32385  | 0.9571    | 1.268     | 0.40581317   | 0.276158956 |    |
| siR_32386  | 1.3116    | 1.8274    | 0.47846465   | 0.127465492 |    |
| siR_3239   | 14.9244   | 7.869     | -0.92342072  | 6.50E-15    |    |
| siR_32402  | 2.0915    | 1.529     | -0.45194959  | 0.123631305 |    |
| siR_324131 | 1.9497    | 0.01      | -7.60710834  | 1.13E-16    | ** |
| siR_32419  | 1.9852    | 1.3426    | -0.56425481  | 0.06635168  |    |
| siR_3242   | 17.6186   | 7.235     | -1.28403437  | 1.97E-28    | ** |
| siR_32424  | 1.0635    | 0.7832    | -0.44136736  | 0.286432527 |    |
| siR_324317 | 1.8788    | 0.01      | -7.55366769  | 4.29E-16    | ** |
| siR_324338 | 1.2407    | 0.01      | -6.95501051  | 7.17E-11    | ** |
| siR_32436  | 0.01      | 1.1934    | 6.89893387   | 9.98E-11    | ** |
| siR_3244   | 5366.4141 | 1776.0085 | -1.5953199   | 0           | ** |
| siR_324407 | 1.028     | 0.01      | -6.68369645  | 3.95E-09    | ** |
| siR_324410 | 1.8079    | 0.01      | -7.49817107  | 1.63E-15    | ** |
| siR_324453 | 3.7222    | 0.01      | -8.54001177  | 3.50E-31    | ** |
| siR_324454 | 1.4534    | 0.01      | -7.18328801  | 1.30E-12    | ** |
| siR_3245   | 201.7811  | 41.2097   | -2.29173518  | 0           | ** |
| siR_3246   | 19.9583   | 18.4605   | -0.11254721  | 0.205753234 |    |
| siR_324688 | 1.418     | 0.01      | -7.14771372  | 2.54E-12    | ** |
| siR_3247   | 4.2894    | 4.438     | 0.04913381   | 0.790868955 |    |
| siR_32480  | 2.836     | 0.3729    | -2.92699683  | 3.49E-14    | ** |
| siR_324810 | 4.0413    | 0.01      | -8.65867564  | 8.57E-34    | ** |
| siR_324857 | 6.1328    | 0.01      | -9.26040207  | 6.51E-51    | ** |
| siR_324858 | 2.0206    | 0.01      | -7.65863995  | 2.96E-17    | ** |
| siR_324893 | 1.2053    | 0.01      | -6.91324847  | 1.40E-10    | ** |

|            |         |         |              |             |    |
|------------|---------|---------|--------------|-------------|----|
| siR_324975 | 3.7931  | 0.01    | -8.56723361  | 9.20E-32    | ** |
| siR_324985 | 1.028   | 0.01    | -6.68369645  | 3.95E-09    | ** |
| siR_324996 | 43.1071 | 0.01    | -12.07371008 | 0           | ** |
| siR_325065 | 1.2762  | 0.01    | -6.99571063  | 3.67E-11    | ** |
| siR_325178 | 1.1344  | 0.01    | -6.82578563  | 5.32E-10    | ** |
| siR_325181 | 1.0989  | 0.01    | -6.7799163   | 1.04E-09    | ** |
| siR_325222 | 5.9556  | 0.01    | -9.21810309  | 1.84E-49    | ** |
| siR_325230 | 2.836   | 0.01    | -8.14771372  | 6.28E-24    | ** |
| siR_3253   | 0.01    | 1.8647  | 7.54279973   | 2.40E-16    | ** |
| siR_325340 | 1.5952  | 0.01    | -7.31759351  | 8.99E-14    | ** |
| siR_325350 | 3.1905  | 0.01    | -8.31763871  | 7.88E-27    | ** |
| siR_32537  | 1.9497  | 2.1258  | 0.12475372   | 0.646877039 |    |
| siR_32547  | 77.1746 | 26.9635 | -1.51711832  | 2.84E-152   | ** |
| siR_325556 | 3.0841  | 0.01    | -8.26870574  | 5.85E-26    | ** |
| siR_325572 | 3.0841  | 0.01    | -8.26870574  | 5.85E-26    | ** |
| siR_325589 | 1.1698  | 0.01    | -6.87011809  | 2.73E-10    | ** |
| siR_325641 | 4.5021  | 0.01    | -8.81445427  | 1.45E-37    | ** |
| siR_325642 | 2.127   | 0.01    | -7.73267621  | 3.99E-18    | ** |
| siR_325745 | 1.3825  | 0.01    | -7.11113566  | 4.95E-12    | ** |
| siR_325747 | 1.737   | 0.01    | -7.44045394  | 6.21E-15    | ** |
| siR_325809 | 1.2407  | 0.01    | -6.95501051  | 7.17E-11    | ** |
| siR_325857 | 1.0635  | 0.01    | -6.73267622  | 2.02E-09    | ** |
| siR_325897 | 1.0989  | 0.01    | -6.7799163   | 1.04E-09    | ** |
| siR_325901 | 1.8434  | 0.01    | -7.52622535  | 8.37E-16    | ** |
| siR_326025 | 2.9423  | 0.01    | -8.20080054  | 8.47E-25    | ** |
| siR_326065 | 3.4032  | 0.01    | -8.41074813  | 1.43E-28    | ** |
| siR_326066 | 2.1979  | 0.01    | -7.77998195  | 1.05E-18    | ** |
| siR_32607  | 1.4889  | 0.4102  | -1.85984746  | 3.15E-05    | ** |
| siR_326076 | 2.0561  | 0.01    | -7.68376661  | 1.52E-17    | ** |
| siR_326089 | 7.7635  | 0.01    | -9.60056343  | 2.92E-64    | ** |
| siR_326138 | 10.4577 | 0.01    | -10.03034988 | 2.59E-86    | ** |
| siR_326139 | 43.0362 | 0.01    | -12.07133512 | 0           | ** |
| siR_32619  | 0.01    | 16.9314 | 10.72548555  | 1.82E-142   | ** |
| siR_326223 | 7.6217  | 0.01    | -9.57396906  | 4.23E-63    | ** |
| siR_326224 | 1.737   | 0.01    | -7.44045394  | 6.21E-15    | ** |
| siR_326229 | 12.1948 | 0.01    | -10.25205047 | 1.57E-100   | ** |
| siR_326237 | 2.4815  | 0.01    | -7.95506863  | 5.01E-21    | ** |
| siR_32633  | 3.8286  | 3.17    | -0.2723341   | 0.193784544 |    |
| siR_326342 | 6.2392  | 0.01    | -9.28521723  | 8.77E-52    | ** |
| siR_326403 | 2.0561  | 0.01    | -7.68376661  | 1.52E-17    | ** |
| siR_326608 | 2.0561  | 0.01    | -7.68376661  | 1.52E-17    | ** |
| siR_326620 | 1.6307  | 0.01    | -7.34934759  | 4.61E-14    | ** |
| siR_326702 | 14.18   | 0.01    | -10.46964185 | 8.86E-117   | ** |
| siR_326721 | 49.2045 | 0.01    | -12.26457486 | 0           | ** |
| siR_326725 | 1.6307  | 0.01    | -7.34934759  | 4.61E-14    | ** |
| siR_326756 | 2.1979  | 0.01    | -7.77998195  | 1.05E-18    | ** |
| siR_326758 | 231.63  | 0.01    | -14.49953452 | 0           | ** |

|            |         |        |              |             |    |
|------------|---------|--------|--------------|-------------|----|
| siR_326759 | 6.7355  | 0.01   | -9.39564121  | 7.60E-56    | ** |
| siR_326760 | 1.418   | 0.01   | -7.14771372  | 2.54E-12    | ** |
| siR_326767 | 1.1698  | 0.01   | -6.87011809  | 2.73E-10    | ** |
| siR_326779 | 17.335  | 0.01   | -10.75947214 | 1.33E-142   | ** |
| siR_326791 | 2.3751  | 0.01   | -7.89184446  | 3.72E-20    | ** |
| siR_326795 | 1.9497  | 0.01   | -7.60710834  | 1.13E-16    | ** |
| siR_326817 | 8.4016  | 0.01   | -9.71452026  | 1.75E-69    | ** |
| siR_326866 | 1.3471  | 0.01   | -7.07371314  | 9.66E-12    | ** |
| siR_326886 | 11.9466 | 0.01   | -10.22238444 | 1.69E-98    | ** |
| siR_326887 | 1.6661  | 0.01   | -7.38033118  | 2.36E-14    | ** |
| siR_326941 | 1.3116  | 0.01   | -7.035184    | 1.88E-11    | ** |
| siR_326943 | 1.1344  | 0.01   | -6.82578563  | 5.32E-10    | ** |
| siR_326992 | 1.3471  | 0.01   | -7.07371314  | 9.66E-12    | ** |
| siR_327013 | 7.9762  | 0.01   | -9.63955783  | 5.31E-66    | ** |
| siR_327102 | 4.6794  | 0.01   | -8.87017976  | 5.13E-39    | ** |
| siR_32711  | 1.2053  | 0.7086 | -0.76634891  | 0.062096306 |    |
| siR_327138 | 3.7222  | 0.01   | -8.54001177  | 3.50E-31    | ** |
| siR_327146 | 2.3751  | 0.01   | -7.89184446  | 3.72E-20    | ** |
| siR_327167 | 1.2762  | 0.01   | -6.99571063  | 3.67E-11    | ** |
| siR_327179 | 1.3471  | 0.01   | -7.07371314  | 9.66E-12    | ** |
| siR_327202 | 2.0915  | 0.01   | -7.70839418  | 7.79E-18    | ** |
| siR_327229 | 2.6587  | 0.01   | -8.05457718  | 1.77E-22    | ** |
| siR_327241 | 8.508   | 0.01   | -9.73267618  | 2.36E-70    | ** |
| siR_32730  | 0.01    | 1.1934 | 6.89893387   | 9.98E-11    | ** |
| siR_327381 | 1.737   | 0.01   | -7.44045394  | 6.21E-15    | ** |
| siR_32746  | 0.01    | 1.8647 | 7.54279973   | 2.40E-16    | ** |
| siR_327478 | 6.3455  | 0.01   | -9.30959008  | 1.18E-52    | ** |
| siR_327547 | 13.8964 | 0.01   | -10.44049554 | 1.86E-114   | ** |
| siR_327599 | 5.282   | 0.01   | -9.04494046  | 5.99E-44    | ** |
| siR_327621 | 16.2006 | 0.01   | -10.6618315  | 2.56E-133   | ** |
| siR_327622 | 5.0339  | 0.01   | -8.97553276  | 6.43E-42    | ** |
| siR_327631 | 5.3884  | 0.01   | -9.07371312  | 8.07E-45    | ** |
| siR_327667 | 2.2688  | 0.01   | -7.82578561  | 2.76E-19    | ** |
| siR_327672 | 4.1476  | 0.01   | -8.69613295  | 1.15E-34    | ** |
| siR_327701 | 2.0915  | 0.01   | -7.70839418  | 7.79E-18    | ** |
| siR_327713 | 1.737   | 0.01   | -7.44045394  | 6.21E-15    | ** |
| siR_327721 | 2.5169  | 0.01   | -7.97550407  | 2.57E-21    | ** |
| siR_32775  | 4.6085  | 1.1561 | -1.99503106  | 9.57E-15    | ** |
| siR_327761 | 1.6661  | 0.01   | -7.38033118  | 2.36E-14    | ** |
| siR_327923 | 1.8434  | 0.01   | -7.52622535  | 8.37E-16    | ** |
| siR_328    | 2.6942  | 0.9696 | -1.47439535  | 1.79E-06    | ** |
| siR_328022 | 2.6942  | 0.01   | -8.07371315  | 9.10E-23    | ** |
| siR_328024 | 11.0249 | 0.01   | -10.10654986 | 5.91E-91    | ** |
| siR_328131 | 85.3635 | 0.01   | -13.05940345 | 0           | ** |
| siR_328138 | 1.028   | 0.01   | -6.68369645  | 3.95E-09    | ** |
| siR_328251 | 32.2595 | 0.01   | -11.65550839 | 9.26E-265   | ** |
| siR_328289 | 3.2968  | 0.01   | -8.36492254  | 1.06E-27    | ** |



|            |          |        |              |             |    |
|------------|----------|--------|--------------|-------------|----|
| siR_328321 | 5.1048   | 0.01   | -8.99571063  | 1.69E-42    | ** |
| siR_328355 | 1.6661   | 0.01   | -7.38033118  | 2.36E-14    | ** |
| siR_32849  | 2.7651   | 1.6782 | -0.720417    | 0.00696811  |    |
| siR_328518 | 1.4534   | 0.01   | -7.18328801  | 1.30E-12    | ** |
| siR_328567 | 2.5169   | 0.01   | -7.97550407  | 2.57E-21    | ** |
| siR_328662 | 4.0413   | 0.01   | -8.65867564  | 8.57E-34    | ** |
| siR_328710 | 8.9688   | 0.01   | -9.80877111  | 3.99E-74    | ** |
| siR_32877  | 6.9482   | 2.7225 | -1.35170723  | 5.41E-13    | ** |
| siR_32878  | 2.3751   | 1.5663 | -0.60062769  | 0.03341639  |    |
| siR_328920 | 1.5243   | 0.01   | -7.25200305  | 3.42E-13    | ** |
| siR_328949 | 1.0635   | 0.01   | -6.73267622  | 2.02E-09    | ** |
| siR_328995 | 6.5582   | 0.01   | -9.35715612  | 2.15E-54    | ** |
| siR_328996 | 2.6587   | 0.01   | -8.05457718  | 1.77E-22    | ** |
| siR_329011 | 1.418    | 0.01   | -7.14771372  | 2.54E-12    | ** |
| siR_329012 | 1.028    | 0.01   | -6.68369645  | 3.95E-09    | ** |
| siR_329017 | 10.245   | 0.01   | -10.00070426 | 1.43E-84    | ** |
| siR_329068 | 1.028    | 0.01   | -6.68369645  | 3.95E-09    | ** |
| siR_329094 | 2.8714   | 0.01   | -8.16561052  | 3.22E-24    | ** |
| siR_329134 | 1.4889   | 0.01   | -7.21810305  | 6.67E-13    | ** |
| siR_329223 | 125.8473 | 0.01   | -13.61938626 | 0           | ** |
| siR_329224 | 1.1698   | 0.01   | -6.87011809  | 2.73E-10    | ** |
| siR_329231 | 11.3085  | 0.01   | -10.14319183 | 2.82E-93    | ** |
| siR_329294 | 7.7281   | 0.01   | -9.59396997  | 5.71E-64    | ** |
| siR_329372 | 149.1734 | 0.01   | -13.86470226 | 0           | ** |
| siR_329373 | 4.2894   | 0.01   | -8.74463204  | 7.97E-36    | ** |
| siR_32938  | 0.01     | 1.1188 | 6.80580835   | 4.20E-10    | ** |
| siR_329381 | 2.2333   | 0.01   | -7.80303324  | 5.38E-19    | ** |
| siR_329401 | 2.5524   | 0.01   | -7.99571063  | 1.32E-21    | ** |
| siR_329425 | 1.028    | 0.01   | -6.68369645  | 3.95E-09    | ** |
| siR_329428 | 12.2302  | 0.01   | -10.25623231 | 8.06E-101   | ** |
| siR_32943  | 0.01     | 18.908 | 10.88478105  | 5.17E-159   | ** |
| siR_329441 | 1.5598   | 0.01   | -7.28521726  | 1.75E-13    | ** |
| siR_329479 | 4.1831   | 0.01   | -8.70842867  | 5.92E-35    | ** |
| siR_329480 | 59.8041  | 0.01   | -12.54602882 | 0           | ** |
| siR_329481 | 1.6307   | 0.01   | -7.34934759  | 4.61E-14    | ** |
| siR_32956  | 3.1196   | 1.1934 | -1.38628337  | 9.01E-07    | ** |
| siR_32958  | 6.9836   | 5.4449 | -0.35906538  | 0.022336287 |    |
| siR_32963  | 0.01     | 1.1934 | 6.89893387   | 9.98E-11    | ** |
| siR_329639 | 16.6615  | 0.01   | -10.70230247 | 4.33E-137   | ** |
| siR_329642 | 1.5952   | 0.01   | -7.31759351  | 8.99E-14    | ** |
| siR_3297   | 0.01     | 2.0139 | 7.65384824   | 1.35E-17    | ** |
| siR_329769 | 56.2591  | 0.01   | -12.45787094 | 0           | ** |
| siR_329770 | 1.3825   | 0.01   | -7.11113566  | 4.95E-12    | ** |
| siR_329782 | 1.6661   | 0.01   | -7.38033118  | 2.36E-14    | ** |
| siR_329783 | 1.028    | 0.01   | -6.68369645  | 3.95E-09    | ** |
| siR_32982  | 1.3825   | 0.3729 | -1.89041878  | 5.10E-05    | ** |
| siR_329826 | 1.1698   | 0.01   | -6.87011809  | 2.73E-10    | ** |

|            |         |        |             |             |    |
|------------|---------|--------|-------------|-------------|----|
| siR_329856 | 1.1698  | 0.01   | -6.87011809 | 2.73E-10    | ** |
| siR_329869 | 1.8079  | 0.01   | -7.49817107 | 1.63E-15    | ** |
| siR_329887 | 1.6307  | 0.01   | -7.34934759 | 4.61E-14    | ** |
| siR_329900 | 1.737   | 0.01   | -7.44045394 | 6.21E-15    | ** |
| siR_329902 | 2.3397  | 0.01   | -7.87017976 | 7.25E-20    | ** |
| siR_329903 | 1.2407  | 0.01   | -6.95501051 | 7.17E-11    | ** |
| siR_329909 | 1.6661  | 0.01   | -7.38033118 | 2.36E-14    | ** |
| siR_329927 | 3.2968  | 0.01   | -8.36492254 | 1.06E-27    | ** |
| siR_329945 | 1.028   | 0.01   | -6.68369645 | 3.95E-09    | ** |
| siR_329958 | 2.836   | 0.01   | -8.14771372 | 6.28E-24    | ** |
| siR_329994 | 3.2614  | 0.01   | -8.34934759 | 2.07E-27    | ** |
| siR_33002  | 1.8788  | 0.7459 | -1.33275737 | 0.000228382 | ** |
| siR_330107 | 8.9688  | 0.01   | -9.80877111 | 3.99E-74    | ** |
| siR_330118 | 3.1196  | 0.01   | -8.28521723 | 3.00E-26    | ** |
| siR_330125 | 10.635  | 0.01   | -10.0546043 | 9.19E-88    | ** |
| siR_33015  | 2.127   | 1.0815 | -0.97578637 | 0.002215323 |    |
| siR_330177 | 1.3825  | 0.01   | -7.11113566 | 4.95E-12    | ** |
| siR_330216 | 1.9143  | 0.01   | -7.58067313 | 2.20E-16    | ** |
| siR_330269 | 1.8079  | 0.01   | -7.49817107 | 1.63E-15    | ** |
| siR_330314 | 1.3116  | 0.01   | -7.035184   | 1.88E-11    | ** |
| siR_330339 | 1.6307  | 0.01   | -7.34934759 | 4.61E-14    | ** |
| siR_330364 | 5.3529  | 0.01   | -9.06417692 | 1.57E-44    | ** |
| siR_330399 | 1.1698  | 0.01   | -6.87011809 | 2.73E-10    | ** |
| siR_330415 | 1.5243  | 0.01   | -7.25200305 | 3.42E-13    | ** |
| siR_33042  | 1.4889  | 0.3356 | -2.14943224 | 4.80E-06    | ** |
| siR_330439 | 5.5302  | 0.01   | -9.11118782 | 5.57E-46    | ** |
| siR_33050  | 7.7281  | 3.3564 | -1.2031991  | 3.61E-12    | ** |
| siR_33051  | 1.028   | 0.8205 | -0.32526503 | 0.431150137 |    |
| siR_330533 | 1.737   | 0.01   | -7.44045394 | 6.21E-15    | ** |
| siR_330607 | 5.1048  | 0.01   | -8.99571063 | 1.69E-42    | ** |
| siR_330613 | 2.4106  | 0.01   | -7.91324847 | 1.91E-20    | ** |
| siR_33067  | 30.097  | 7.3469 | -2.03441215 | 4.51E-90    | ** |
| siR_33068  | 1.7725  | 0.5221 | -1.76338756 | 1.14E-05    | ** |
| siR_33069  | 1.0989  | 0.1865 | -2.55881257 | 1.47E-05    | ** |
| siR_33070  | 1.737   | 0.1119 | -3.95631581 | 1.79E-11    | ** |
| siR_33074  | 12.6556 | 6.2654 | -1.01429738 | 8.65E-15    | ** |
| siR_33075  | 1.9143  | 1.6036 | -0.25550262 | 0.38974108  |    |
| siR_33077  | 1.1698  | 0.2984 | -1.97094245 | 0.000133017 | ** |
| siR_33084  | 4.963   | 1.9393 | -1.35567646 | 1.03E-09    | ** |
| siR_330860 | 3.7222  | 0.01   | -8.54001177 | 3.50E-31    | ** |
| siR_330870 | 1.1344  | 0.01   | -6.82578563 | 5.32E-10    | ** |
| siR_33089  | 1.2762  | 0.6713 | -0.92682489 | 0.023898405 |    |
| siR_330911 | 1.1344  | 0.01   | -6.82578563 | 5.32E-10    | ** |
| siR_33094  | 1.5243  | 0.3729 | -2.03128617 | 7.99E-06    | ** |
| siR_330971 | 5.4947  | 0.01   | -9.10189688 | 1.09E-45    | ** |
| siR_330990 | 1.9852  | 0.01   | -7.63314056 | 5.78E-17    | ** |
| siR_330991 | 2.5878  | 0.01   | -8.0155823  | 6.75E-22    | ** |

|            |         |        |              |             |    |
|------------|---------|--------|--------------|-------------|----|
| siR_330993 | 6.0265  | 0.01   | -9.23517658  | 4.83E-50    | ** |
| siR_33102  | 1.0635  | 0.2611 | -2.02614567  | 0.000213675 | ** |
| siR_33105  | 1.2407  | 0.5594 | -1.14920216  | 0.007946935 | ** |
| siR_331103 | 9.0043  | 0.01   | -9.81447031  | 2.04E-74    | ** |
| siR_331164 | 2.0915  | 0.01   | -7.70839418  | 7.79E-18    | ** |
| siR_33125  | 1.5598  | 0.3356 | -2.21654644  | 1.81E-06    | ** |
| siR_331314 | 23.3615 | 0.01   | -11.18991721 | 6.26E-192   | ** |
| siR_331318 | 3.545   | 0.01   | -8.4696418   | 9.89E-30    | ** |
| siR_33137  | 1.2407  | 0.5967 | -1.05607663  | 0.013149564 | *  |
| siR_331375 | 1.7725  | 0.01   | -7.46964183  | 3.18E-15    | ** |
| siR_331455 | 1.028   | 0.01   | -6.68369645  | 3.95E-09    | ** |
| siR_331483 | 5.6365  | 0.01   | -9.13865581  | 7.51E-47    | ** |
| siR_331534 | 1.1344  | 0.8951 | -0.34180866  | 0.385445259 |    |
| siR_331638 | 1.9143  | 0.01   | -7.58067313  | 2.20E-16    | ** |
| siR_331644 | 14.1445 | 0.01   | -10.46602543 | 1.73E-116   | ** |
| siR_331663 | 2.2333  | 0.01   | -7.80303324  | 5.38E-19    | ** |
| siR_331703 | 1.3825  | 0.01   | -7.11113566  | 4.95E-12    | ** |
| siR_33175  | 6.4873  | 2.163  | -1.58458449  | 4.29E-15    | ** |
| siR_331751 | 4.6794  | 0.01   | -8.87017976  | 5.13E-39    | ** |
| siR_331753 | 1.8079  | 0.01   | -7.49817107  | 1.63E-15    | ** |
| siR_331754 | 15.4207 | 0.01   | -10.59065252 | 6.19E-127   | ** |
| siR_33177  | 2.127   | 0.2611 | -3.02614567  | 2.86E-11    | ** |
| siR_33182  | 3.4386  | 1.9393 | -0.8262853   | 0.000693384 |    |
| siR_331858 | 1.028   | 0.01   | -6.68369645  | 3.95E-09    | ** |
| siR_331966 | 3.6868  | 0.01   | -8.52622535  | 6.83E-31    | ** |
| siR_33197  | 1.1698  | 0.3729 | -1.64940119  | 0.000716423 | ** |
| siR_331975 | 1.2407  | 0.01   | -6.95501051  | 7.17E-11    | ** |
| siR_331989 | 1.1344  | 0.01   | -6.82578563  | 5.32E-10    | ** |
| siR_33202  | 1.2407  | 0.2984 | -2.05583487  | 5.17E-05    | ** |
| siR_33211  | 2.4815  | 0.4848 | -2.35575085  | 3.37E-10    | ** |
| siR_332176 | 1.028   | 0.01   | -6.68369645  | 3.95E-09    | ** |
| siR_332298 | 2.0561  | 0.01   | -7.68376661  | 1.52E-17    | ** |
| siR_332338 | 1.6307  | 0.01   | -7.34934759  | 4.61E-14    | ** |
| siR_332386 | 2.3042  | 0.01   | -7.84812212  | 1.41E-19    | ** |
| siR_332394 | 3.2614  | 0.01   | -8.34934759  | 2.07E-27    | ** |
| siR_33243  | 5.6365  | 1.7155 | -1.71617047  | 1.01E-14    | ** |
| siR_332495 | 1.4534  | 0.01   | -7.18328801  | 1.30E-12    | ** |
| siR_33260  | 1.2407  | 0.5594 | -1.14920216  | 0.007946935 | ** |
| siR_332626 | 7.8699  | 0.01   | -9.62020147  | 3.94E-65    | ** |
| siR_332627 | 2.8714  | 0.01   | -8.16561052  | 3.22E-24    | ** |
| siR_332635 | 2.0206  | 0.01   | -7.65863995  | 2.96E-17    | ** |
| siR_33267  | 7.3027  | 4.7736 | -0.61335228  | 0.000134459 |    |
| siR_332801 | 2.5524  | 0.01   | -7.99571063  | 1.32E-21    | ** |
| siR_332814 | 1.4534  | 0.01   | -7.18328801  | 1.30E-12    | ** |
| siR_332839 | 2.0915  | 0.01   | -7.70839418  | 7.79E-18    | ** |
| siR_33286  | 1.1698  | 0.5967 | -0.97118421  | 0.024714955 |    |
| siR_33294  | 13.3646 | 2.0512 | -2.70387659  | 7.41E-57    | ** |

|            |         |         |              |           |    |
|------------|---------|---------|--------------|-----------|----|
| siR_332950 | 3.8286  | 0.01    | -8.58067313  | 4.72E-32  | ** |
| siR_333    | 36.9743 | 10.4423 | -1.82408332  | 1.55E-95  | ** |
| siR_3331   | 0.01    | 2.2003  | 7.78155643   | 3.72E-19  | ** |
| siR_333103 | 1.3825  | 0.01    | -7.11113566  | 4.95E-12  | ** |
| siR_333131 | 1.5598  | 0.01    | -7.28521726  | 1.75E-13  | ** |
| siR_333154 | 2.6587  | 0.01    | -8.05457718  | 1.77E-22  | ** |
| siR_333181 | 1.028   | 0.01    | -6.68369645  | 3.95E-09  | ** |
| siR_333262 | 1.1698  | 0.01    | -6.87011809  | 2.73E-10  | ** |
| siR_333264 | 1.5598  | 0.01    | -7.28521726  | 1.75E-13  | ** |
| siR_333265 | 3.4386  | 0.01    | -8.42567749  | 7.34E-29  | ** |
| siR_333302 | 2.1624  | 0.01    | -7.75648961  | 2.05E-18  | ** |
| siR_333322 | 5.3529  | 0.01    | -9.06417692  | 1.57E-44  | ** |
| siR_333323 | 2.6942  | 0.01    | -8.07371315  | 9.10E-23  | ** |
| siR_333349 | 1.7016  | 0.01    | -7.41074813  | 1.21E-14  | ** |
| siR_333358 | 2.0561  | 0.01    | -7.68376661  | 1.52E-17  | ** |
| siR_33337  | 5.3884  | 2.0512  | -1.39338878  | 8.20E-11  | ** |
| siR_333441 | 4.1476  | 0.01    | -8.69613295  | 1.15E-34  | ** |
| siR_333454 | 1.9852  | 0.01    | -7.63314056  | 5.78E-17  | ** |
| siR_333455 | 1.0635  | 0.01    | -6.73267622  | 2.02E-09  | ** |
| siR_33348  | 7.09    | 2.4614  | -1.5263065   | 1.43E-15  | ** |
| siR_333534 | 1.1698  | 0.01    | -6.87011809  | 2.73E-10  | ** |
| siR_33356  | 0.01    | 5.7805  | 9.17505048   | 3.99E-49  | ** |
| siR_333566 | 1.418   | 0.01    | -7.14771372  | 2.54E-12  | ** |
| siR_333572 | 9.9614  | 0.01    | -9.96020464  | 2.99E-82  | ** |
| siR_33365  | 0.01    | 2.9462  | 8.20271156   | 2.12E-25  | ** |
| siR_333672 | 1.6307  | 0.01    | -7.34934759  | 4.61E-14  | ** |
| siR_333674 | 1.9497  | 0.01    | -7.60710834  | 1.13E-16  | ** |
| siR_333690 | 1.0989  | 0.01    | -6.7799163   | 1.04E-09  | ** |
| siR_333709 | 1.5243  | 0.01    | -7.25200305  | 3.42E-13  | ** |
| siR_333710 | 1.4889  | 0.01    | -7.21810305  | 6.67E-13  | ** |
| siR_33373  | 16.1652 | 5.5195  | -1.55028187  | 2.71E-34  | ** |
| siR_333768 | 4.4312  | 0.01    | -8.79155366  | 5.51E-37  | ** |
| siR_33386  | 13.0101 | 8.2419  | -0.65858319  | 5.50E-08  | ** |
| siR_333900 | 2.446   | 0.01    | -7.93428061  | 9.77E-21  | ** |
| siR_334    | 3.155   | 0.8205  | -1.94306477  | 3.28E-10  | ** |
| siR_33402  | 5.3175  | 1.529   | -1.79815972  | 8.33E-15  | ** |
| siR_33403  | 2.9778  | 0.8578  | -1.79553364  | 7.20E-09  | ** |
| siR_334079 | 16.7324 | 0.01    | -10.70842867 | 1.14E-137 | ** |
| siR_334091 | 10.9895 | 0.01    | -10.10191004 | 1.15E-90  | ** |
| siR_334173 | 5.9556  | 0.01    | -9.21810309  | 1.84E-49  | ** |
| siR_334180 | 1.3471  | 0.01    | -7.07371314  | 9.66E-12  | ** |
| siR_334237 | 21.4118 | 0.01    | -11.06419036 | 5.69E-176 | ** |
| siR_334241 | 1.9852  | 0.01    | -7.63314056  | 5.78E-17  | ** |
| siR_334261 | 1.8788  | 0.01    | -7.55366769  | 4.29E-16  | ** |
| siR_334296 | 1.2762  | 0.01    | -6.99571063  | 3.67E-11  | ** |
| siR_334352 | 9.4651  | 0.01    | -9.8864739   | 3.46E-78  | ** |
| siR_33438  | 0.01    | 1.8647  | 7.54279973   | 2.40E-16  | ** |

|            |          |         |              |           |    |
|------------|----------|---------|--------------|-----------|----|
| siR_33443  | 0.01     | 9.2862  | 9.85894454   | 1.80E-78  | ** |
| siR_334443 | 2.2688   | 0.01    | -7.82578561  | 2.76E-19  | ** |
| siR_334444 | 2.0915   | 0.01    | -7.70839418  | 7.79E-18  | ** |
| siR_334447 | 1.5243   | 0.01    | -7.25200305  | 3.42E-13  | ** |
| siR_334451 | 1.5243   | 0.01    | -7.25200305  | 3.42E-13  | ** |
| siR_334462 | 110.3203 | 0.01    | -13.42941144 | 0         | ** |
| siR_334464 | 3.4386   | 0.01    | -8.42567749  | 7.34E-29  | ** |
| siR_334467 | 11.4858  | 0.01    | -10.16563558 | 9.99E-95  | ** |
| siR_334485 | 7.8344   | 0.01    | -9.61367902  | 7.69E-65  | ** |
| siR_334492 | 2.9423   | 0.01    | -8.20080054  | 8.47E-25  | ** |
| siR_33450  | 91.9926  | 30.1334 | -1.61015435  | 2.26E-197 | ** |
| siR_334502 | 1.7725   | 0.01    | -7.46964183  | 3.18E-15  | ** |
| siR_334520 | 2.5878   | 0.01    | -8.0155823   | 6.75E-22  | ** |
| siR_334551 | 6.9127   | 0.01    | -9.43310546  | 2.69E-57  | ** |
| siR_334622 | 5.5656   | 0.01    | -9.12039339  | 2.86E-46  | ** |
| siR_334761 | 1.3471   | 0.01    | -7.07371314  | 9.66E-12  | ** |
| siR_334763 | 2.6587   | 0.01    | -8.05457718  | 1.77E-22  | ** |
| siR_334764 | 2.127    | 0.01    | -7.73267621  | 3.99E-18  | ** |
| siR_334854 | 3.6513   | 0.01    | -8.51226639  | 1.33E-30  | ** |
| siR_33486  | 0.01     | 2.6106  | 8.02823761   | 1.37E-22  | ** |
| siR_334865 | 1.0635   | 0.01    | -6.73267622  | 2.02E-09  | ** |
| siR_334870 | 1.3116   | 0.01    | -7.035184    | 1.88E-11  | ** |
| siR_334890 | 1.9497   | 0.01    | -7.60710834  | 1.13E-16  | ** |
| siR_334917 | 1.0989   | 0.01    | -6.7799163   | 1.04E-09  | ** |
| siR_334984 | 1.3825   | 0.01    | -7.11113566  | 4.95E-12  | ** |
| siR_334992 | 1.3471   | 0.01    | -7.07371314  | 9.66E-12  | ** |
| siR_335009 | 1.418    | 0.01    | -7.14771372  | 2.54E-12  | ** |
| siR_335122 | 23.2552  | 0.01    | -11.18333747 | 4.64E-191 | ** |
| siR_335130 | 109.7531 | 0.01    | -13.42197406 | 0         | ** |
| siR_335131 | 3.864    | 0.01    | -8.59395129  | 2.42E-32  | ** |
| siR_335136 | 80.6486  | 0.01    | -12.97743392 | 0         | ** |
| siR_335137 | 1.1344   | 0.01    | -6.82578563  | 5.32E-10  | ** |
| siR_335164 | 1.5243   | 0.01    | -7.25200305  | 3.42E-13  | ** |
| siR_33517  | 8.1889   | 2.9462  | -1.4748143   | 5.88E-17  | ** |
| siR_335213 | 1.6307   | 0.01    | -7.34934759  | 4.61E-14  | ** |
| siR_335330 | 1.3825   | 0.01    | -7.11113566  | 4.95E-12  | ** |
| siR_335385 | 1.3116   | 0.01    | -7.035184    | 1.88E-11  | ** |
| siR_335443 | 3.0132   | 0.01    | -8.23515263  | 2.23E-25  | ** |
| siR_335551 | 4.9984   | 0.01    | -8.96532255  | 1.25E-41  | ** |
| siR_335585 | 1.5243   | 0.01    | -7.25200305  | 3.42E-13  | ** |
| siR_335645 | 4.7503   | 0.01    | -8.89187482  | 1.35E-39  | ** |
| siR_33565  | 2.9069   | 1.1188  | -1.37752928  | 2.40E-06  | ** |
| siR_335655 | 8.4371   | 0.01    | -9.72060336  | 8.98E-70  | ** |
| siR_335679 | 4.0058   | 0.01    | -8.64594661  | 1.67E-33  | ** |
| siR_335694 | 13.8609  | 0.01    | -10.43680517 | 3.62E-114 | ** |
| siR_33570  | 3.3323   | 1.4172  | -1.23347492  | 3.46E-06  | ** |
| siR_335729 | 1.1698   | 0.01    | -6.87011809  | 2.73E-10  | ** |

|            |          |        |              |           |    |
|------------|----------|--------|--------------|-----------|----|
| siR_335734 | 1.3471   | 0.01   | -7.07371314  | 9.66E-12  | ** |
| siR_335737 | 2.127    | 0.01   | -7.73267621  | 3.99E-18  | ** |
| siR_335743 | 1.9497   | 0.01   | -7.60710834  | 1.13E-16  | ** |
| siR_335744 | 1.5598   | 0.01   | -7.28521726  | 1.75E-13  | ** |
| siR_33575  | 3.0841   | 0.2984 | -3.3695301   | 2.72E-17  | ** |
| siR_335750 | 3.6868   | 0.01   | -8.52622535  | 6.83E-31  | ** |
| siR_335755 | 2.5524   | 0.01   | -7.99571063  | 1.32E-21  | ** |
| siR_335771 | 6.1328   | 0.01   | -9.26040207  | 6.51E-51  | ** |
| siR_335780 | 1.4534   | 0.01   | -7.18328801  | 1.30E-12  | ** |
| siR_335786 | 5.8492   | 0.01   | -9.19209551  | 1.36E-48  | ** |
| siR_335800 | 4.8566   | 0.01   | -8.92380283  | 1.82E-40  | ** |
| siR_335825 | 1.7725   | 0.01   | -7.46964183  | 3.18E-15  | ** |
| siR_335827 | 2.3397   | 0.01   | -7.87017976  | 7.25E-20  | ** |
| siR_335884 | 1.7725   | 0.01   | -7.46964183  | 3.18E-15  | ** |
| siR_33592  | 0.01     | 1.4172 | 7.14689956   | 1.34E-12  | ** |
| siR_33595  | 0.01     | 1.8647 | 7.54279973   | 2.40E-16  | ** |
| siR_335998 | 1.7725   | 0.01   | -7.46964183  | 3.18E-15  | ** |
| siR_33601  | 0.01     | 1.4918 | 7.22091032   | 3.17E-13  | ** |
| siR_33604  | 0.01     | 4.3261 | 8.7569232    | 5.97E-37  | ** |
| siR_336071 | 1.9143   | 0.01   | -7.58067313  | 2.20E-16  | ** |
| siR_336167 | 2.127    | 0.01   | -7.73267621  | 3.99E-18  | ** |
| siR_33617  | 0.01     | 1.268  | 6.98641094   | 2.37E-11  | ** |
| siR_336192 | 7.7635   | 0.01   | -9.60056343  | 2.92E-64  | ** |
| siR_336201 | 1.737    | 0.01   | -7.44045394  | 6.21E-15  | ** |
| siR_336293 | 7.3381   | 0.01   | -9.51926273  | 8.87E-61  | ** |
| siR_336360 | 1.028    | 0.01   | -6.68369645  | 3.95E-09  | ** |
| siR_336371 | 1.2407   | 0.01   | -6.95501051  | 7.17E-11  | ** |
| siR_336429 | 5.3529   | 0.01   | -9.06417692  | 1.57E-44  | ** |
| siR_336495 | 1.028    | 0.01   | -6.68369645  | 3.95E-09  | ** |
| siR_336505 | 4.0767   | 0.01   | -8.67125799  | 4.39E-34  | ** |
| siR_336526 | 1.5243   | 0.01   | -7.25200305  | 3.42E-13  | ** |
| siR_336530 | 8.8625   | 0.01   | -9.7915699   | 2.96E-73  | ** |
| siR_336533 | 2.0206   | 0.01   | -7.65863995  | 2.96E-17  | ** |
| siR_33659  | 15.8461  | 7.6079 | -1.05855762  | 2.42E-19  | ** |
| siR_336665 | 2.5878   | 0.01   | -8.0155823   | 6.75E-22  | ** |
| siR_336711 | 19.1784  | 0.01   | -10.90526674 | 1.08E-157 | ** |
| siR_336762 | 7.2318   | 0.01   | -9.49821097  | 6.58E-60  | ** |
| siR_33681  | 1.2053   | 0.2984 | -2.01407284  | 8.31E-05  | ** |
| siR_336893 | 17.4768  | 0.01   | -10.77122541 | 9.18E-144 | ** |
| siR_336942 | 2.5524   | 0.01   | -7.99571063  | 1.32E-21  | ** |
| siR_336945 | 3.3677   | 0.01   | -8.39561983  | 2.79E-28  | ** |
| siR_336961 | 1.2053   | 0.01   | -6.91324847  | 1.40E-10  | ** |
| siR_33698  | 0.01     | 2.9462 | 8.20271156   | 2.12E-25  | ** |
| siR_337001 | 214.5431 | 0.01   | -14.38897929 | 0         | ** |
| siR_337015 | 7.2318   | 0.01   | -9.49821097  | 6.58E-60  | ** |
| siR_33702  | 0.01     | 1.8274 | 7.51364865   | 4.92E-16  | ** |
| siR_337022 | 1.5243   | 0.01   | -7.25200305  | 3.42E-13  | ** |

|            |         |         |              |             |    |
|------------|---------|---------|--------------|-------------|----|
| siR_337032 | 1.0635  | 0.01    | -6.73267622  | 2.02E-09    | ** |
| siR_337059 | 1.4889  | 0.01    | -7.21810305  | 6.67E-13    | ** |
| siR_33706  | 1.1344  | 0.634   | -0.83937469  | 0.050540314 |    |
| siR_337062 | 9.7842  | 0.01    | -9.93431004  | 8.45E-81    | ** |
| siR_337074 | 1.737   | 0.01    | -7.44045394  | 6.21E-15    | ** |
| siR_337076 | 1.6307  | 0.01    | -7.34934759  | 4.61E-14    | ** |
| siR_33712  | 1.8434  | 1.3426  | -0.45733961  | 0.144321434 |    |
| siR_337124 | 1.1698  | 0.01    | -6.87011809  | 2.73E-10    | ** |
| siR_337200 | 23.8933 | 0.01    | -11.2223903  | 2.78E-196   | ** |
| siR_337205 | 23.397  | 0.01    | -11.19210792 | 3.21E-192   | ** |
| siR_337376 | 9.6778  | 0.01    | -9.9185353   | 6.27E-80    | ** |
| siR_337381 | 1.3116  | 0.01    | -7.035184    | 1.88E-11    | ** |
| siR_33753  | 5.4238  | 2.2003  | -1.30160374  | 6.13E-10    | ** |
| siR_33758  | 2.0561  | 1.0442  | -0.97751237  | 0.002596476 |    |
| siR_33759  | 1.5598  | 0.4475  | -1.80140147  | 3.03E-05    | ** |
| siR_337619 | 1.1344  | 0.01    | -6.82578563  | 5.32E-10    | ** |
| siR_337893 | 1.737   | 0.01    | -7.44045394  | 6.21E-15    | ** |
| siR_33791  | 2.7651  | 0.5221  | -2.40493359  | 1.84E-11    | ** |
| siR_33795  | 1.028   | 0.4848  | -1.08437866  | 0.021479092 | *  |
| siR_33798  | 0.01    | 1.3053  | 7.02823761   | 1.15E-11    | ** |
| siR_33800  | 0.01    | 4.1023  | 8.68028919   | 4.46E-35    | ** |
| siR_33808  | 0.01    | 2.4987  | 7.96503389   | 1.18E-21    | ** |
| siR_338152 | 1.4889  | 0.01    | -7.21810305  | 6.67E-13    | ** |
| siR_338255 | 2.5878  | 0.01    | -8.0155823   | 6.75E-22    | ** |
| siR_33826  | 1.1698  | 0.5594  | -1.06430974  | 0.015477614 | *  |
| siR_338322 | 1.1698  | 0.01    | -6.87011809  | 2.73E-10    | ** |
| siR_338456 | 2.6233  | 0.01    | -8.035239    | 3.46E-22    | ** |
| siR_338502 | 2.7296  | 0.01    | -8.09254576  | 4.66E-23    | ** |
| siR_338546 | 1.3471  | 0.01    | -7.07371314  | 9.66E-12    | ** |
| siR_338593 | 1.5598  | 0.01    | -7.28521726  | 1.75E-13    | ** |
| siR_338690 | 2.4106  | 0.01    | -7.91324847  | 1.91E-20    | ** |
| siR_338801 | 2.6233  | 0.01    | -8.035239    | 3.46E-22    | ** |
| siR_33881  | 0.01    | 3.9159  | 8.61320011   | 1.62E-33    | ** |
| siR_338890 | 4.0058  | 0.01    | -8.64594661  | 1.67E-33    | ** |
| siR_339231 | 3.9349  | 0.01    | -8.62018319  | 6.36E-33    | ** |
| siR_339386 | 1.418   | 0.01    | -7.14771372  | 2.54E-12    | ** |
| siR_339446 | 12.9038 | 0.01    | -10.33358029 | 2.47E-106   | ** |
| siR_33953  | 13.7546 | 6.3027  | -1.12587229  | 1.31E-18    | ** |
| siR_339530 | 2.1979  | 0.01    | -7.77998195  | 1.05E-18    | ** |
| siR_33954  | 14.2154 | 5.967   | -1.25237701  | 2.02E-22    | ** |
| siR_33955  | 2.1979  | 1.3799  | -0.67156203  | 0.023914899 |    |
| siR_33956  | 3.0841  | 1.0815  | -1.51181588  | 1.88E-07    | ** |
| siR_33962  | 1.0635  | 0.3356  | -1.66400541  | 0.001193189 | ** |
| siR_33963  | 87.2069 | 47.0649 | -0.88979076  | 1.25E-74    |    |
| siR_339635 | 1.4889  | 0.01    | -7.21810305  | 6.67E-13    | ** |
| siR_33964  | 44.0288 | 18.4232 | -1.25692385  | 2.40E-66    | ** |
| siR_33965  | 7.6572  | 2.536   | -1.59426219  | 1.07E-17    | ** |

|            |          |          |              |             |    |
|------------|----------|----------|--------------|-------------|----|
| siR_339660 | 6.4873   | 0.01     | -9.34147438  | 8.16E-54    | ** |
| siR_339712 | 1.0989   | 0.01     | -6.7799163   | 1.04E-09    | ** |
| siR_339777 | 3.4386   | 0.01     | -8.42567749  | 7.34E-29    | ** |
| siR_339795 | 1.5952   | 0.01     | -7.31759351  | 8.99E-14    | ** |
| siR_33981  | 0.9217   | 1.0815   | 0.23066451   | 0.554575008 |    |
| siR_33991  | 0.01     | 1.8274   | 7.51364865   | 4.92E-16    | ** |
| siR_34008  | 777.5947 | 404.7503 | -0.94198624  | 0           |    |
| siR_34009  | 22.7234  | 15.7753  | -0.52651127  | 4.13E-09    |    |
| siR_34010  | 15.0662  | 6.1908   | -1.28311783  | 1.62E-24    | ** |
| siR_34011  | 6.6646   | 3.9531   | -0.75353384  | 1.23E-05    |    |
| siR_34012  | 1.9497   | 0.5967   | -1.70817447  | 6.58E-06    | ** |
| siR_34022  | 54.3093  | 34.3849  | -0.65942412  | 9.31E-29    |    |
| siR_340249 | 1.028    | 0.01     | -6.68369645  | 3.95E-09    | ** |
| siR_340370 | 2.2333   | 0.01     | -7.80303324  | 5.38E-19    | ** |
| siR_340420 | 1.418    | 0.01     | -7.14771372  | 2.54E-12    | ** |
| siR_340422 | 3.8286   | 0.01     | -8.58067313  | 4.72E-32    | ** |
| siR_340423 | 15.6689  | 0.01     | -10.61368817 | 5.76E-129   | ** |
| siR_340475 | 2.4106   | 0.01     | -7.91324847  | 1.91E-20    | ** |
| siR_34053  | 2.127    | 1.3799   | -0.62425631  | 0.037353781 |    |
| siR_34058  | 0.01     | 11.8594  | 10.21181531  | 5.19E-100   | ** |
| siR_3406   | 0.01     | 1.3053   | 7.02823761   | 1.15E-11    | ** |
| siR_340629 | 1.0635   | 0.01     | -6.73267622  | 2.02E-09    | ** |
| siR_340642 | 1.3471   | 0.01     | -7.07371314  | 9.66E-12    | ** |
| siR_34070  | 14.7826  | 2.5733   | -2.52220847  | 3.67E-58    | ** |
| siR_340727 | 1.2053   | 0.01     | -6.91324847  | 1.40E-10    | ** |
| siR_340801 | 1.4889   | 0.01     | -7.21810305  | 6.67E-13    | ** |
| siR_340810 | 14.8181  | 0.01     | -10.53314466 | 5.30E-122   | ** |
| siR_340816 | 2.6942   | 0.01     | -8.07371315  | 9.10E-23    | ** |
| siR_34082  | 1.1698   | 0.2611   | -2.16358753  | 5.01E-05    | ** |
| siR_340824 | 4.3603   | 0.01     | -8.76828358  | 2.10E-36    | ** |
| siR_34087  | 3.1905   | 0.3356   | -3.24896791  | 2.59E-17    | ** |
| siR_341113 | 1.418    | 0.01     | -7.14771372  | 2.54E-12    | ** |
| siR_341203 | 5.6011   | 0.01     | -9.12956637  | 1.46E-46    | ** |
| siR_341259 | 4.8212   | 0.01     | -8.91324847  | 3.54E-40    | ** |
| siR_341293 | 1.1344   | 0.01     | -6.82578563  | 5.32E-10    | ** |
| siR_341430 | 1.4534   | 0.01     | -7.18328801  | 1.30E-12    | ** |
| siR_341442 | 2.6233   | 0.01     | -8.035239    | 3.46E-22    | ** |
| siR_34155  | 0.01     | 15.8499  | 10.63025802  | 2.05E-133   | ** |
| siR_341579 | 1.4889   | 0.01     | -7.21810305  | 6.67E-13    | ** |
| siR_34161  | 21.6954  | 17.8638  | -0.28035018  | 0.001409251 |    |
| siR_341645 | 4.8212   | 0.01     | -8.91324847  | 3.54E-40    | ** |
| siR_34168  | 34.2092  | 34.5341  | 0.01363726   | 0.83663578  |    |
| siR_341728 | 2.2688   | 0.01     | -7.82578561  | 2.76E-19    | ** |
| siR_341735 | 1.2762   | 0.01     | -6.99571063  | 3.67E-11    | ** |
| siR_341744 | 4.254    | 0.01     | -8.73267624  | 1.56E-35    | ** |
| siR_341758 | 1.5598   | 0.01     | -7.28521726  | 1.75E-13    | ** |
| siR_34177  | 1.3825   | 0.8205   | -0.75270424  | 0.048742451 |    |



|            |         |         |              |             |    |
|------------|---------|---------|--------------|-------------|----|
| siR_341773 | 1.6661  | 0.01    | -7.38033118  | 2.36E-14    | ** |
| siR_341788 | 6.5582  | 0.01    | -9.35715612  | 2.15E-54    | ** |
| siR_341820 | 1.1344  | 0.01    | -6.82578563  | 5.32E-10    | ** |
| siR_341835 | 2.5878  | 0.01    | -8.0155823   | 6.75E-22    | ** |
| siR_341858 | 6.7     | 0.01    | -9.3880173   | 1.48E-55    | ** |
| siR_341865 | 1.9143  | 0.01    | -7.58067313  | 2.20E-16    | ** |
| siR_34191  | 1.3825  | 0.5594  | -1.30532732  | 0.001931693 | ** |
| siR_341912 | 3.2968  | 0.01    | -8.36492254  | 1.06E-27    | ** |
| siR_341914 | 2.2333  | 0.01    | -7.80303324  | 5.38E-19    | ** |
| siR_34192  | 17.9377 | 3.7294  | -2.26597947  | 4.67E-62    | ** |
| siR_341923 | 65.547  | 0.01    | -12.67831388 | 0           | ** |
| siR_341924 | 5.1048  | 0.01    | -8.99571063  | 1.69E-42    | ** |
| siR_341925 | 1.4889  | 0.01    | -7.21810305  | 6.67E-13    | ** |
| siR_342020 | 3.5095  | 0.01    | -8.45512172  | 1.93E-29    | ** |
| siR_34203  | 1.0989  | 0.634   | -0.79350536  | 0.066742311 |    |
| siR_342061 | 3.6159  | 0.01    | -8.49821097  | 2.60E-30    | ** |
| siR_342063 | 3.2968  | 0.01    | -8.36492254  | 1.06E-27    | ** |
| siR_34209  | 1.7725  | 0.7832  | -1.17833296  | 0.001154208 | ** |
| siR_342099 | 9.3588  | 0.01    | -9.87017969  | 2.56E-77    | ** |
| siR_342109 | 1.4534  | 0.01    | -7.18328801  | 1.30E-12    | ** |
| siR_342116 | 1.0989  | 0.01    | -6.7799163   | 1.04E-09    | ** |
| siR_342119 | 3.9349  | 0.01    | -8.62018319  | 6.36E-33    | ** |
| siR_342127 | 1.2053  | 0.01    | -6.91324847  | 1.40E-10    | ** |
| siR_342159 | 43.3907 | 0.01    | -12.08317034 | 0           | ** |
| siR_342167 | 1.028   | 0.01    | -6.68369645  | 3.95E-09    | ** |
| siR_342187 | 3.0841  | 0.01    | -8.26870574  | 5.85E-26    | ** |
| siR_342189 | 1.2053  | 0.01    | -6.91324847  | 1.40E-10    | ** |
| siR_34219  | 5.991   | 1.4918  | -2.0057427   | 7.25E-19    | ** |
| siR_3422   | 4.1122  | 2.797   | -0.55603018  | 0.00882381  |    |
| siR_34223  | 9.8551  | 4.0277  | -1.29091428  | 1.05E-16    | ** |
| siR_34224  | 83.5555 | 31.1404 | -1.42394732  | 4.84E-150   | ** |
| siR_34225  | 33.5711 | 7.9063  | -2.08614521  | 1.66E-103   | ** |
| siR_342258 | 2.0561  | 0.01    | -7.68376661  | 1.52E-17    | ** |
| siR_342276 | 1.3825  | 0.01    | -7.11113566  | 4.95E-12    | ** |
| siR_34229  | 1.028   | 0.0373  | -4.78452082  | 6.17E-08    | ** |
| siR_34230  | 4.6794  | 1.6036  | -1.54500923  | 6.38E-11    | ** |
| siR_34245  | 0.01    | 1.8647  | 7.54279973   | 2.40E-16    | ** |
| siR_342469 | 1.3471  | 0.01    | -7.07371314  | 9.66E-12    | ** |
| siR_342519 | 2.5524  | 0.01    | -7.99571063  | 1.32E-21    | ** |
| siR_34255  | 2.446   | 1.9766  | -0.30740346  | 0.245048937 |    |
| siR_34259  | 0.01    | 3.0954  | 8.27398204   | 1.20E-26    | ** |
| siR_342596 | 1.8788  | 0.01    | -7.55366769  | 4.29E-16    | ** |
| siR_342634 | 1.0635  | 0.01    | -6.73267622  | 2.02E-09    | ** |
| siR_34264  | 1.0635  | 0.634   | -0.74626529  | 0.087380955 |    |
| siR_34266  | 3.7577  | 1.9766  | -0.92682895  | 9.24E-05    |    |
| siR_34268  | 20.9509 | 18.0502 | -0.2149974   | 0.0149555   |    |
| siR_34270  | 1.7016  | 1.0815  | -0.65385827  | 0.052814454 |    |

|            |         |          |              |             |    |
|------------|---------|----------|--------------|-------------|----|
| siR_342745 | 1.2407  | 0.01     | -6.95501051  | 7.17E-11    | ** |
| siR_342826 | 1.028   | 0.01     | -6.68369645  | 3.95E-09    | ** |
| siR_34287  | 2.6942  | 2.1258   | -0.34185108  | 0.177130031 |    |
| siR_342889 | 3.7931  | 0.01     | -8.56723361  | 9.20E-32    | ** |
| siR_34299  | 4.3603  | 0.5594   | -2.96247524  | 2.43E-21    | ** |
| siR_343    | 7.0191  | 2.0139   | -1.80129401  | 3.98E-19    | ** |
| siR_34303  | 0.01    | 1.9393   | 7.59939219   | 5.69E-17    | ** |
| siR_343184 | 1.1344  | 0.01     | -6.82578563  | 5.32E-10    | ** |
| siR_343228 | 2.5169  | 0.01     | -7.97550407  | 2.57E-21    | ** |
| siR_343294 | 2.2333  | 0.01     | -7.80303324  | 5.38E-19    | ** |
| siR_3433   | 0.01    | 2.536    | 7.98641094   | 5.76E-22    | ** |
| siR_343412 | 4.0413  | 0.01     | -8.65867564  | 8.57E-34    | ** |
| siR_343418 | 1.1344  | 0.01     | -6.82578563  | 5.32E-10    | ** |
| siR_34342  | 0.01    | 2.4614   | 7.94333532   | 2.43E-21    | ** |
| siR_34349  | 3.8995  | 1.1934   | -1.70821147  | 1.50E-10    | ** |
| siR_3435   | 0.01    | 3.3192   | 8.37469175   | 1.60E-28    | ** |
| siR_34354  | 1.3116  | 0.634    | -1.04877306  | 0.011177638 | *  |
| siR_343554 | 4.7503  | 0.01     | -8.89187482  | 1.35E-39    | ** |
| siR_34356  | 3.4386  | 2.0885   | -0.71935416  | 0.002620964 |    |
| siR_343651 | 3.7931  | 0.01     | -8.56723361  | 9.20E-32    | ** |
| siR_343688 | 5.8138  | 0.01     | -9.18333764  | 2.66E-48    | ** |
| siR_343692 | 5.3175  | 0.01     | -9.0546043   | 3.07E-44    | ** |
| siR_34377  | 6.9836  | 2.3495   | -1.57161716  | 5.78E-16    | ** |
| siR_34386  | 15.8816 | 5.2584   | -1.59466047  | 4.62E-35    | ** |
| siR_343887 | 49.9844 | 0.01     | -12.28726233 | 0           | ** |
| siR_343902 | 1.2407  | 0.01     | -6.95501051  | 7.17E-11    | ** |
| siR_34391  | 0.01    | 3.0954   | 8.27398204   | 1.20E-26    | ** |
| siR_34393  | 0.01    | 1.5663   | 7.29121675   | 7.54E-14    | ** |
| siR_343938 | 1.2762  | 0.01     | -6.99571063  | 3.67E-11    | ** |
| siR_34394  | 0.01    | 110.6882 | 13.43421381  | 0           | ** |
| siR_344    | 8.2953  | 1.4545   | -2.51177086  | 3.55E-33    | ** |
| siR_34402  | 0.01    | 1.5663   | 7.29121675   | 7.54E-14    | ** |
| siR_344031 | 2.0206  | 0.01     | -7.65863995  | 2.96E-17    | ** |
| siR_34405  | 0.01    | 1.4918   | 7.22091032   | 3.17E-13    | ** |
| siR_344065 | 49.0982 | 0.01     | -12.2614541  | 0           | ** |
| siR_344072 | 47.7156 | 0.01     | -12.22024506 | 0           | ** |
| siR_34413  | 0.01    | 1.0815   | 6.75688986   | 8.62E-10    | ** |
| siR_34416  | 68.8793 | 30.581   | -1.1714349   | 3.78E-92    | ** |
| siR_344229 | 1.5952  | 0.01     | -7.31759351  | 8.99E-14    | ** |
| siR_344233 | 2.5524  | 0.01     | -7.99571063  | 1.32E-21    | ** |
| siR_344294 | 1.5952  | 0.01     | -7.31759351  | 8.99E-14    | ** |
| siR_344295 | 1.4534  | 0.01     | -7.18328801  | 1.30E-12    | ** |
| siR_34431  | 0.01    | 1.1561   | 6.85312238   | 2.05E-10    | ** |
| siR_344369 | 1.3116  | 0.01     | -7.035184    | 1.88E-11    | ** |
| siR_344379 | 1.4889  | 0.01     | -7.21810305  | 6.67E-13    | ** |
| siR_34440  | 1.2407  | 1.7528   | 0.49850707   | 0.121270293 |    |
| siR_344457 | 1.7725  | 0.01     | -7.46964183  | 3.18E-15    | ** |

|            |          |         |               |              |    |
|------------|----------|---------|---------------|--------------|----|
| siR_344460 | 1. 0989  | 0. 01   | -6. 7799163   | 1. 04E-09    | ** |
| siR_344466 | 1. 8788  | 0. 01   | -7. 55366769  | 4. 29E-16    | ** |
| siR_344473 | 12. 3011 | 0. 01   | -10. 26457167 | 2. 12E-101   | ** |
| siR_344478 | 1. 5952  | 0. 01   | -7. 31759351  | 8. 99E-14    | ** |
| siR_344494 | 1. 0635  | 0. 01   | -6. 73267622  | 2. 02E-09    | ** |
| siR_344512 | 3. 2259  | 0. 01   | -8. 33355791  | 4. 04E-27    | ** |
| siR_344527 | 6. 8064  | 0. 01   | -9. 41074808  | 2. 00E-56    | ** |
| siR_344538 | 1. 8079  | 0. 01   | -7. 49817107  | 1. 63E-15    | ** |
| siR_344565 | 4. 3249  | 0. 01   | -8. 75652296  | 4. 09E-36    | ** |
| siR_344585 | 4. 9984  | 0. 01   | -8. 96532255  | 1. 25E-41    | ** |
| siR_3446   | 1. 4889  | 1. 268  | -0. 23169211  | 0. 491099214 |    |
| siR_34461  | 1. 9497  | 0. 2238 | -3. 12297021  | 1. 04E-10    | ** |
| siR_344616 | 1. 1344  | 0. 01   | -6. 82578563  | 5. 32E-10    | ** |
| siR_344650 | 1. 0989  | 0. 01   | -6. 7799163   | 1. 04E-09    | ** |
| siR_344745 | 1. 1344  | 0. 01   | -6. 82578563  | 5. 32E-10    | ** |
| siR_34477  | 8. 2244  | 6. 9367 | -0. 24566094  | 0. 083549347 |    |
| siR_34478  | 8. 2598  | 6. 4891 | -0. 34808845  | 0. 015773494 |    |
| siR_34480  | 9. 0043  | 8. 3538 | -0. 10818152  | 0. 414470493 |    |
| siR_34481  | 3. 4032  | 2. 6106 | -0. 38251052  | 0. 091472249 |    |
| siR_344815 | 1. 3825  | 0. 01   | -7. 11113566  | 4. 95E-12    | ** |
| siR_3449   | 13. 9673 | 6. 7502 | -1. 04905101  | 5. 33E-17    | ** |
| siR_34490  | 21. 0218 | 9. 3235 | -1. 17294266  | 2. 24E-29    | ** |
| siR_345165 | 6. 9482  | 0. 01   | -9. 44049544  | 1. 38E-57    | ** |
| siR_345199 | 1. 2053  | 0. 01   | -6. 91324847  | 1. 40E-10    | ** |
| siR_345217 | 1. 0635  | 0. 01   | -6. 73267622  | 2. 02E-09    | ** |
| siR_345245 | 2. 4815  | 0. 01   | -7. 95506863  | 5. 01E-21    | ** |
| siR_345327 | 14. 8535 | 0. 01   | -10. 5365872  | 2. 72E-122   | ** |
| siR_345414 | 1. 2407  | 0. 01   | -6. 95501051  | 7. 17E-11    | ** |
| siR_345435 | 5. 8847  | 0. 01   | -9. 20082503  | 6. 99E-49    | ** |
| siR_345523 | 1. 0989  | 0. 01   | -6. 7799163   | 1. 04E-09    | ** |
| siR_345530 | 2. 6942  | 0. 01   | -8. 07371315  | 9. 10E-23    | ** |
| siR_345539 | 15. 598  | 0. 01   | -10. 60714542 | 2. 19E-128   | ** |
| siR_345602 | 3. 2259  | 0. 01   | -8. 33355791  | 4. 04E-27    | ** |
| siR_345624 | 1. 4534  | 0. 01   | -7. 18328801  | 1. 30E-12    | ** |
| siR_345661 | 1. 2407  | 0. 01   | -6. 95501051  | 7. 17E-11    | ** |
| siR_345681 | 3. 2614  | 0. 01   | -8. 34934759  | 2. 07E-27    | ** |
| siR_345686 | 2. 836   | 0. 01   | -8. 14771372  | 6. 28E-24    | ** |
| siR_345707 | 1. 5952  | 0. 01   | -7. 31759351  | 8. 99E-14    | ** |
| siR_345712 | 6. 1328  | 0. 01   | -9. 26040207  | 6. 51E-51    | ** |
| siR_345718 | 32. 3304 | 0. 01   | -11. 65867569 | 2. 43E-265   | ** |
| siR_345719 | 1. 5598  | 0. 01   | -7. 28521726  | 1. 75E-13    | ** |
| siR_345726 | 29. 388  | 0. 01   | -11. 52101164 | 2. 95E-241   | ** |
| siR_345727 | 1. 028   | 0. 01   | -6. 68369645  | 3. 95E-09    | ** |
| siR_345764 | 5. 3884  | 0. 01   | -9. 07371312  | 8. 07E-45    | ** |
| siR_345808 | 8. 2598  | 0. 01   | -9. 689963    | 2. 53E-68    | ** |
| siR_345886 | 3. 5095  | 0. 01   | -8. 45512172  | 1. 93E-29    | ** |
| siR_345896 | 1. 418   | 0. 01   | -7. 14771372  | 2. 54E-12    | ** |

|            |          |        |              |             |    |
|------------|----------|--------|--------------|-------------|----|
| siR_345964 | 1.4534   | 0.01   | -7.18328801  | 1.30E-12    | ** |
| siR_34603  | 0.01     | 1.1561 | 6.85312238   | 2.05E-10    | ** |
| siR_346039 | 3.2259   | 0.01   | -8.33355791  | 4.04E-27    | ** |
| siR_34606  | 34.1383  | 9.2116 | -1.88986755  | 1.29E-92    | ** |
| siR_346064 | 1.418    | 0.01   | -7.14771372  | 2.54E-12    | ** |
| siR_346074 | 1.5598   | 0.01   | -7.28521726  | 1.75E-13    | ** |
| siR_346082 | 1.9852   | 0.01   | -7.63314056  | 5.78E-17    | ** |
| siR_346101 | 3.0487   | 0.01   | -8.25205038  | 1.14E-25    | ** |
| siR_346134 | 3.9349   | 0.01   | -8.62018319  | 6.36E-33    | ** |
| siR_346161 | 1.9852   | 0.01   | -7.63314056  | 5.78E-17    | ** |
| siR_346162 | 1.4534   | 0.01   | -7.18328801  | 1.30E-12    | ** |
| siR_346194 | 4.1476   | 0.01   | -8.69613295  | 1.15E-34    | ** |
| siR_346205 | 15.7043  | 0.01   | -10.61694386 | 2.96E-129   | ** |
| siR_346229 | 9.7487   | 0.01   | -9.92906603  | 1.65E-80    | ** |
| siR_346333 | 1.4889   | 0.01   | -7.21810305  | 6.67E-13    | ** |
| siR_346337 | 2.9423   | 0.01   | -8.20080054  | 8.47E-25    | ** |
| siR_346340 | 1.737    | 0.01   | -7.44045394  | 6.21E-15    | ** |
| siR_346369 | 2.7296   | 0.01   | -8.09254576  | 4.66E-23    | ** |
| siR_346391 | 1.8434   | 0.01   | -7.52622535  | 8.37E-16    | ** |
| siR_346393 | 3.3677   | 0.01   | -8.39561983  | 2.79E-28    | ** |
| siR_346396 | 1.1344   | 0.01   | -6.82578563  | 5.32E-10    | ** |
| siR_346418 | 4.3249   | 0.01   | -8.75652296  | 4.09E-36    | ** |
| siR_34643  | 1.3825   | 0.7086 | -0.96423611  | 0.014998473 |    |
| siR_34644  | 1.2053   | 0.7832 | -0.62193961  | 0.120458422 |    |
| siR_346485 | 1.3825   | 0.01   | -7.11113566  | 4.95E-12    | ** |
| siR_346495 | 7.8699   | 0.01   | -9.62020147  | 3.94E-65    | ** |
| siR_34656  | 0.01     | 2.8343 | 8.14684866   | 1.83E-24    | ** |
| siR_346563 | 1.2053   | 0.01   | -6.91324847  | 1.40E-10    | ** |
| siR_346564 | 1.5598   | 0.01   | -7.28521726  | 1.75E-13    | ** |
| siR_346602 | 1.9852   | 0.01   | -7.63314056  | 5.78E-17    | ** |
| siR_346606 | 14.3218  | 0.01   | -10.48399702 | 6.12E-118   | ** |
| siR_346608 | 1.7016   | 0.01   | -7.41074813  | 1.21E-14    | ** |
| siR_346664 | 1.1698   | 0.01   | -6.87011809  | 2.73E-10    | ** |
| siR_346665 | 1.2053   | 0.01   | -6.91324847  | 1.40E-10    | ** |
| siR_346692 | 2.0561   | 0.01   | -7.68376661  | 1.52E-17    | ** |
| siR_346697 | 1.7016   | 0.01   | -7.41074813  | 1.21E-14    | ** |
| siR_346729 | 1.1698   | 0.01   | -6.87011809  | 2.73E-10    | ** |
| siR_346749 | 1.4534   | 0.01   | -7.18328801  | 1.30E-12    | ** |
| siR_346771 | 1.1698   | 0.01   | -6.87011809  | 2.73E-10    | ** |
| siR_346800 | 123.3304 | 0.01   | -13.59024101 | 0           | ** |
| siR_346801 | 4.8921   | 0.01   | -8.93431011  | 9.31E-41    | ** |
| siR_346802 | 2.1624   | 0.01   | -7.75648961  | 2.05E-18    | ** |
| siR_346809 | 2.0915   | 0.01   | -7.70839418  | 7.79E-18    | ** |
| siR_346818 | 4.6085   | 0.01   | -8.84815347  | 1.95E-38    | ** |
| siR_346838 | 8.0471   | 0.01   | -9.65232515  | 1.40E-66    | ** |
| siR_346845 | 13.6482  | 0.01   | -10.41449488 | 1.99E-112   | ** |
| siR_346846 | 52.8559  | 0.01   | -12.36784909 | 0           | ** |

|            |            |           |              |              |    |
|------------|------------|-----------|--------------|--------------|----|
| siR_346847 | 1. 6307    | 0. 01     | -7. 34934759 | 4. 61E-14    | ** |
| siR_34688  | 122. 8341  | 74. 1029  | -0. 72910921 | 1. 17E-74    |    |
| siR_346939 | 1. 3471    | 0. 01     | -7. 07371314 | 9. 66E-12    | ** |
| siR_34695  | 2162. 9081 | 647. 3469 | -1. 74036143 | 0            | ** |
| siR_34696  | 1. 9852    | 2. 3495   | 0. 24306941  | 0. 359145421 |    |
| siR_34697  | 1. 2762    | 0. 9696   | -0. 39639284 | 0. 289463081 |    |
| siR_346996 | 1. 737     | 0. 01     | -7. 44045394 | 6. 21E-15    | ** |
| siR_347003 | 3. 8995    | 0. 01     | -8. 60714536 | 1. 24E-32    | ** |
| siR_34703  | 83. 3783   | 55. 7543  | -0. 58058888 | 8. 22E-35    |    |
| siR_34704  | 2. 5878    | 1. 1188   | -1. 20977396 | 5. 77E-05    | ** |
| siR_34705  | 1. 5243    | 1. 0442   | -0. 54574881 | 0. 119431711 |    |
| siR_34710  | 0. 01      | 15. 477   | 10. 59591014 | 2. 72E-130   | ** |
| siR_347119 | 1. 1698    | 0. 01     | -6. 87011809 | 2. 73E-10    | ** |
| siR_347136 | 3. 3323    | 0. 01     | -8. 38037447 | 5. 44E-28    | ** |
| siR_347152 | 1. 3825    | 0. 01     | -7. 11113566 | 4. 95E-12    | ** |
| siR_347156 | 1. 1344    | 0. 01     | -6. 82578563 | 5. 32E-10    | ** |
| siR_347172 | 4. 6794    | 0. 01     | -8. 87017976 | 5. 13E-39    | ** |
| siR_347182 | 1. 7016    | 0. 01     | -7. 41074813 | 1. 21E-14    | ** |
| siR_347184 | 64. 1644   | 0. 01     | -12. 647557  | 0            | ** |
| siR_3472   | 11. 9821   | 12. 6426  | 0. 07741241  | 0. 484693165 |    |
| siR_347207 | 1. 3471    | 0. 01     | -7. 07371314 | 9. 66E-12    | ** |
| siR_347235 | 1. 2762    | 0. 01     | -6. 99571063 | 3. 67E-11    | ** |
| siR_34728  | 2. 9778    | 1. 6409   | -0. 85975954 | 0. 001103406 |    |
| siR_3473   | 0. 01      | 5. 7433   | 9. 16573611  | 8. 19E-49    | ** |
| siR_34731  | 0. 01      | 8. 5776   | 9. 74443023  | 1. 54E-72    | ** |
| siR_347325 | 3. 1905    | 0. 01     | -8. 31763871 | 7. 88E-27    | ** |
| siR_347339 | 1. 0989    | 0. 01     | -6. 7799163  | 1. 04E-09    | ** |
| siR_347353 | 1. 6307    | 0. 01     | -7. 34934759 | 4. 61E-14    | ** |
| siR_347354 | 1. 028     | 0. 01     | -6. 68369645 | 3. 95E-09    | ** |
| siR_347392 | 1. 028     | 0. 01     | -6. 68369645 | 3. 95E-09    | ** |
| siR_34740  | 0. 01      | 2. 0885   | 7. 70632333  | 3. 21E-18    | ** |
| siR_34741  | 0. 01      | 1. 6036   | 7. 32517051  | 3. 67E-14    | ** |
| siR_347417 | 2. 9423    | 0. 01     | -8. 20080054 | 8. 47E-25    | ** |
| siR_347432 | 2. 9069    | 0. 01     | -8. 18333764 | 1. 65E-24    | ** |
| siR_3475   | 0. 01      | 1. 3426   | 7. 06888574  | 5. 63E-12    | ** |
| siR_347525 | 1. 5598    | 0. 01     | -7. 28521726 | 1. 75E-13    | ** |
| siR_347530 | 1. 0989    | 0. 01     | -6. 7799163  | 1. 04E-09    | ** |
| siR_347548 | 1. 2762    | 0. 01     | -6. 99571063 | 3. 67E-11    | ** |
| siR_347554 | 1. 1698    | 0. 01     | -6. 87011809 | 2. 73E-10    | ** |
| siR_347603 | 1. 4534    | 0. 01     | -7. 18328801 | 1. 30E-12    | ** |
| siR_34762  | 17. 2641   | 3. 3937   | -2. 34684418 | 2. 61E-62    | ** |
| siR_347676 | 1. 9852    | 0. 01     | -7. 63314056 | 5. 78E-17    | ** |
| siR_347688 | 3. 6159    | 0. 01     | -8. 49821097 | 2. 60E-30    | ** |
| siR_347703 | 1. 4889    | 0. 01     | -7. 21810305 | 6. 67E-13    | ** |
| siR_347707 | 2. 6942    | 0. 01     | -8. 07371315 | 9. 10E-23    | ** |
| siR_34774  | 4. 6085    | 2. 5733   | -0. 84067759 | 6. 60E-05    |    |
| siR_347752 | 1. 3116    | 0. 01     | -7. 035184   | 1. 88E-11    | ** |

|            |         |        |              |             |    |
|------------|---------|--------|--------------|-------------|----|
| siR_347755 | 4.0058  | 0.01   | -8.64594661  | 1.67E-33    | ** |
| siR_347781 | 1.9852  | 0.01   | -7.63314056  | 5.78E-17    | ** |
| siR_347896 | 1.5598  | 0.01   | -7.28521726  | 1.75E-13    | ** |
| siR_347919 | 1.5598  | 0.01   | -7.28521726  | 1.75E-13    | ** |
| siR_347943 | 1.418   | 0.01   | -7.14771372  | 2.54E-12    | ** |
| siR_34797  | 10.0323 | 7.869  | -0.35040018  | 0.007401911 |    |
| siR_347983 | 1.0635  | 0.01   | -6.73267622  | 2.02E-09    | ** |
| siR_347984 | 5.1757  | 0.01   | -9.01561019  | 4.44E-43    | ** |
| siR_348082 | 2.5169  | 0.01   | -7.97550407  | 2.57E-21    | ** |
| siR_348083 | 1.8434  | 0.01   | -7.52622535  | 8.37E-16    | ** |
| siR_348166 | 8.0471  | 0.01   | -9.65232515  | 1.40E-66    | ** |
| siR_348172 | 1.1698  | 0.01   | -6.87011809  | 2.73E-10    | ** |
| siR_34820  | 0.01    | 1.6409 | 7.35834351   | 1.79E-14    | ** |
| siR_348238 | 2.0915  | 0.01   | -7.70839418  | 7.79E-18    | ** |
| siR_348280 | 1.4534  | 0.01   | -7.18328801  | 1.30E-12    | ** |
| siR_3483   | 1.8788  | 0.634  | -1.56725675  | 3.20E-05    | ** |
| siR_34838  | 2.1624  | 0.7832 | -1.46518075  | 2.12E-05    | ** |
| siR_348388 | 1.2762  | 0.01   | -6.99571063  | 3.67E-11    | ** |
| siR_348398 | 3.6159  | 0.01   | -8.49821097  | 2.60E-30    | ** |
| siR_3484   | 14.889  | 4.4007 | -1.75844193  | 1.25E-37    | ** |
| siR_348478 | 17.0514 | 0.01   | -10.7356745  | 2.78E-140   | ** |
| siR_348525 | 1.3471  | 0.01   | -7.07371314  | 9.66E-12    | ** |
| siR_348611 | 4.1831  | 0.01   | -8.70842867  | 5.92E-35    | ** |
| siR_348653 | 1.2762  | 0.01   | -6.99571063  | 3.67E-11    | ** |
| siR_348688 | 1.8434  | 0.01   | -7.52622535  | 8.37E-16    | ** |
| siR_34872  | 1.2762  | 0.5594 | -1.18990228  | 0.005634656 | ** |
| siR_34880  | 0.01    | 1.8274 | 7.51364865   | 4.92E-16    | ** |
| siR_348803 | 1.1698  | 0.01   | -6.87011809  | 2.73E-10    | ** |
| siR_348806 | 17.4414 | 0.01   | -10.76830006 | 1.79E-143   | ** |
| siR_348878 | 30.6642 | 0.01   | -11.58233954 | 1.06E-251   | ** |
| siR_348888 | 3.1196  | 0.01   | -8.28521723  | 3.00E-26    | ** |
| siR_348891 | 2.1979  | 0.01   | -7.77998195  | 1.05E-18    | ** |
| siR_34892  | 0.01    | 3.3192 | 8.37469175   | 1.60E-28    | ** |
| siR_348932 | 2.6233  | 0.01   | -8.035239    | 3.46E-22    | ** |
| siR_348994 | 1.4534  | 0.01   | -7.18328801  | 1.30E-12    | ** |
| siR_3490   | 2.0206  | 3.431  | 0.76384537   | 0.001477417 |    |
| siR_349051 | 1.0989  | 0.01   | -6.7799163   | 1.04E-09    | ** |
| siR_3491   | 0.01    | 2.4987 | 7.96503389   | 1.18E-21    | ** |
| siR_34912  | 0.01    | 1.3426 | 7.06888574   | 5.63E-12    | ** |
| siR_349147 | 3.3677  | 0.01   | -8.39561983  | 2.79E-28    | ** |
| siR_349172 | 1.2407  | 0.01   | -6.95501051  | 7.17E-11    | ** |
| siR_349208 | 21.979  | 0.01   | -11.10190988 | 1.30E-180   | ** |
| siR_349235 | 3.7931  | 0.01   | -8.56723361  | 9.20E-32    | ** |
| siR_349264 | 1.7016  | 0.01   | -7.41074813  | 1.21E-14    | ** |
| siR_34927  | 1.0635  | 0.1119 | -3.24853809  | 1.55E-06    | ** |
| siR_349324 | 2.3042  | 0.01   | -7.84812212  | 1.41E-19    | ** |
| siR_349337 | 1.028   | 0.01   | -6.68369645  | 3.95E-09    | ** |

|            |          |         |               |              |    |
|------------|----------|---------|---------------|--------------|----|
| siR_349345 | 1. 5952  | 0. 01   | -7. 31759351  | 8. 99E-14    | ** |
| siR_349349 | 2. 836   | 0. 01   | -8. 14771372  | 6. 28E-24    | ** |
| siR_349358 | 13. 4355 | 0. 01   | -10. 39183435 | 1. 10E-110   | ** |
| siR_349362 | 6. 7355  | 0. 01   | -9. 39564121  | 7. 60E-56    | ** |
| siR_349405 | 5. 5302  | 0. 01   | -9. 11118782  | 5. 57E-46    | ** |
| siR_349418 | 1. 2053  | 0. 01   | -6. 91324847  | 1. 40E-10    | ** |
| siR_349422 | 1. 6307  | 0. 01   | -7. 34934759  | 4. 61E-14    | ** |
| siR_349665 | 11. 1667 | 0. 01   | -10. 12498721 | 4. 08E-92    | ** |
| siR_349739 | 2. 0915  | 0. 01   | -7. 70839418  | 7. 79E-18    | ** |
| siR_349811 | 2. 4815  | 0. 01   | -7. 95506863  | 5. 01E-21    | ** |
| siR_349816 | 56. 6845 | 0. 01   | -12. 46873833 | 0            | ** |
| siR_349817 | 8. 3662  | 0. 01   | -9. 70842867  | 3. 42E-69    | ** |
| siR_349835 | 1. 418   | 0. 01   | -7. 14771372  | 2. 54E-12    | ** |
| siR_349863 | 3. 1196  | 0. 01   | -8. 28521723  | 3. 00E-26    | ** |
| siR_349901 | 1. 6307  | 0. 01   | -7. 34934759  | 4. 61E-14    | ** |
| siR_34993  | 2. 3751  | 0. 7832 | -1. 60053559  | 1. 96E-06    | ** |
| siR_349936 | 3. 7222  | 0. 01   | -8. 54001177  | 3. 50E-31    | ** |
| siR_349941 | 2. 8005  | 0. 01   | -8. 12954063  | 1. 23E-23    | ** |
| siR_3500   | 0. 01    | 1. 0815 | 6. 75688986   | 8. 62E-10    | ** |
| siR_35003  | 1. 4534  | 0. 7832 | -0. 89197914  | 0. 019383579 |    |
| siR_35006  | 0. 01    | 2. 2003 | 7. 78155643   | 3. 72E-19    | ** |
| siR_350074 | 6. 0974  | 0. 01   | -9. 25205038  | 1. 27E-50    | ** |
| siR_350119 | 2. 8005  | 0. 01   | -8. 12954063  | 1. 23E-23    | ** |
| siR_350125 | 91. 1418 | 0. 01   | -13. 15389769 | 0            | ** |
| siR_350126 | 21. 8726 | 0. 01   | -11. 09490906 | 9. 62E-180   | ** |
| siR_350127 | 4. 2894  | 0. 01   | -8. 74463204  | 7. 97E-36    | ** |
| siR_350128 | 1. 8788  | 0. 01   | -7. 55366769  | 4. 29E-16    | ** |
| siR_350138 | 6. 1328  | 0. 01   | -9. 26040207  | 6. 51E-51    | ** |
| siR_350139 | 3. 3323  | 0. 01   | -8. 38037447  | 5. 44E-28    | ** |
| siR_350225 | 1. 5243  | 0. 01   | -7. 25200305  | 3. 42E-13    | ** |
| siR_350230 | 3. 4386  | 0. 01   | -8. 42567749  | 7. 34E-29    | ** |
| siR_350238 | 1. 7016  | 0. 01   | -7. 41074813  | 1. 21E-14    | ** |
| siR_350254 | 1. 418   | 0. 01   | -7. 14771372  | 2. 54E-12    | ** |
| siR_350267 | 3. 6868  | 0. 01   | -8. 52622535  | 6. 83E-31    | ** |
| siR_350326 | 1. 5598  | 0. 01   | -7. 28521726  | 1. 75E-13    | ** |
| siR_350340 | 11. 663  | 0. 01   | -10. 18772327 | 3. 54E-96    | ** |
| siR_35040  | 0. 01    | 1. 6036 | 7. 32517051   | 3. 67E-14    | ** |
| siR_350402 | 5. 8138  | 0. 01   | -9. 18333764  | 2. 66E-48    | ** |
| siR_350430 | 49. 5945 | 0. 01   | -12. 27596415 | 0            | ** |
| siR_350517 | 2. 2688  | 0. 01   | -7. 82578561  | 2. 76E-19    | ** |
| siR_350553 | 1. 2762  | 0. 01   | -6. 99571063  | 3. 67E-11    | ** |
| siR_350564 | 6. 381   | 0. 01   | -9. 31763871  | 6. 06E-53    | ** |
| siR_350634 | 2. 3397  | 0. 01   | -7. 87017976  | 7. 25E-20    | ** |
| siR_350642 | 9. 0043  | 0. 01   | -9. 81447031  | 2. 04E-74    | ** |
| siR_350699 | 3. 2259  | 0. 01   | -8. 33355791  | 4. 04E-27    | ** |
| siR_3507   | 5. 991   | 1. 9393 | -1. 62726084  | 1. 54E-14    | ** |
| siR_350729 | 1. 7725  | 0. 01   | -7. 46964183  | 3. 18E-15    | ** |

|            |          |        |              |             |    |
|------------|----------|--------|--------------|-------------|----|
| siR_35073  | 1.418    | 0.5967 | -1.24877985  | 0.002405224 | ** |
| siR_350737 | 6.6291   | 0.01   | -9.37266921  | 5.64E-55    | ** |
| siR_35074  | 2.836    | 1.1934 | -1.24877985  | 1.57E-05    | ** |
| siR_350779 | 1.5243   | 0.01   | -7.25200305  | 3.42E-13    | ** |
| siR_350805 | 2.5169   | 0.01   | -7.97550407  | 2.57E-21    | ** |
| siR_35081  | 0.01     | 1.3053 | 7.02823761   | 1.15E-11    | ** |
| siR_350827 | 1.3471   | 0.01   | -7.07371314  | 9.66E-12    | ** |
| siR_350887 | 1.9852   | 0.01   | -7.63314056  | 5.78E-17    | ** |
| siR_350906 | 1.6661   | 0.01   | -7.38033118  | 2.36E-14    | ** |
| siR_35093  | 4.0767   | 2.3122 | -0.8181356   | 0.000247352 |    |
| siR_3510   | 2.7296   | 0.7459 | -1.87163542  | 1.23E-08    | ** |
| siR_351029 | 2.4815   | 0.01   | -7.95506863  | 5.01E-21    | ** |
| siR_351034 | 8.2953   | 0.01   | -9.69615036  | 1.30E-68    | ** |
| siR_351066 | 2.7296   | 0.01   | -8.09254576  | 4.66E-23    | ** |
| siR_351087 | 1.1344   | 0.01   | -6.82578563  | 5.32E-10    | ** |
| siR_35113  | 0.01     | 2.2003 | 7.78155643   | 3.72E-19    | ** |
| siR_35114  | 0.01     | 1.6409 | 7.35834351   | 1.79E-14    | ** |
| siR_351168 | 1.7016   | 0.01   | -7.41074813  | 1.21E-14    | ** |
| siR_351202 | 2.5878   | 0.01   | -8.0155823   | 6.75E-22    | ** |
| siR_35121  | 43.7098  | 24.241 | -0.85050756  | 1.38E-35    |    |
| siR_351234 | 1.0989   | 0.01   | -6.7799163   | 1.04E-09    | ** |
| siR_351268 | 1.0635   | 0.01   | -6.73267622  | 2.02E-09    | ** |
| siR_351331 | 54.522   | 0.01   | -12.41262277 | 0           | ** |
| siR_351359 | 2.6233   | 0.01   | -8.035239    | 3.46E-22    | ** |
| siR_351378 | 3.4032   | 0.01   | -8.41074813  | 1.43E-28    | ** |
| siR_351381 | 1.2053   | 0.01   | -6.91324847  | 1.40E-10    | ** |
| siR_351405 | 1.3825   | 0.01   | -7.11113566  | 4.95E-12    | ** |
| siR_351447 | 2.3397   | 0.01   | -7.87017976  | 7.25E-20    | ** |
| siR_351455 | 84.6899  | 0.01   | -13.04797463 | 0           | ** |
| siR_35148  | 12.5847  | 2.2376 | -2.49164676  | 4.37E-49    | ** |
| siR_351525 | 6.5582   | 0.01   | -9.35715612  | 2.15E-54    | ** |
| siR_351580 | 766.9598 | 0.01   | -16.22686257 | 0           | ** |
| siR_351581 | 16.0234  | 0.01   | -10.64596453 | 7.23E-132   | ** |
| siR_351582 | 3.0841   | 0.01   | -8.26870574  | 5.85E-26    | ** |
| siR_35168  | 1.6307   | 0.8578 | -0.92677817  | 0.01044997  |    |
| siR_351693 | 3.545    | 0.01   | -8.4696418   | 9.89E-30    | ** |
| siR_351695 | 1.7016   | 0.01   | -7.41074813  | 1.21E-14    | ** |
| siR_351717 | 1.0989   | 0.01   | -6.7799163   | 1.04E-09    | ** |
| siR_351754 | 41.051   | 0.01   | -12.0032018  | 0           | ** |
| siR_351755 | 10.9895  | 0.01   | -10.10191004 | 1.15E-90    | ** |
| siR_351769 | 2.6587   | 0.01   | -8.05457718  | 1.77E-22    | ** |
| siR_351770 | 1.4534   | 0.01   | -7.18328801  | 1.30E-12    | ** |
| siR_35183  | 1.2407   | 0.6713 | -0.88612477  | 0.0320329   |    |
| siR_351837 | 1.6661   | 0.01   | -7.38033118  | 2.36E-14    | ** |
| siR_35184  | 1.028    | 0.5967 | -0.78476258  | 0.079326488 |    |
| siR_351862 | 4.7148   | 0.01   | -8.88105279  | 2.63E-39    | ** |
| siR_351864 | 5.6011   | 0.01   | -9.12956637  | 1.46E-46    | ** |



|            |          |         |              |             |    |
|------------|----------|---------|--------------|-------------|----|
| siR_351888 | 1.9497   | 0.01    | -7.60710834  | 1.13E-16    | ** |
| siR_351891 | 6.4164   | 0.01    | -9.3256203   | 3.11E-53    | ** |
| siR_351929 | 165.2677 | 0.01    | -14.01251696 | 0           | ** |
| siR_35195  | 0.01     | 1.5663  | 7.29121675   | 7.54E-14    | ** |
| siR_352028 | 1.9143   | 0.01    | -7.58067313  | 2.20E-16    | ** |
| siR_35203  | 1.028    | 0.5221  | -0.9774422   | 0.034659916 |    |
| siR_352030 | 1.418    | 0.01    | -7.14771372  | 2.54E-12    | ** |
| siR_352065 | 2.836    | 0.01    | -8.14771372  | 6.28E-24    | ** |
| siR_35210  | 1.028    | 0.7459  | -0.46278613  | 0.27375448  |    |
| siR_352172 | 1.3825   | 0.01    | -7.11113566  | 4.95E-12    | ** |
| siR_352192 | 2.446    | 0.01    | -7.93428061  | 9.77E-21    | ** |
| siR_352196 | 2.0206   | 0.01    | -7.65863995  | 2.96E-17    | ** |
| siR_352209 | 1.028    | 0.01    | -6.68369645  | 3.95E-09    | ** |
| siR_352237 | 4.1122   | 0.01    | -8.68376664  | 2.25E-34    | ** |
| siR_3523   | 0.01     | 6.3027  | 9.29982618   | 1.70E-53    | ** |
| siR_352500 | 10.5286  | 0.01    | -10.04009789 | 6.82E-87    | ** |
| siR_352519 | 2.446    | 0.01    | -7.93428061  | 9.77E-21    | ** |
| siR_352571 | 9.3588   | 0.01    | -9.87017969  | 2.56E-77    | ** |
| siR_35261  | 3.864    | 0.2984  | -3.69477565  | 6.08E-23    | ** |
| siR_35264  | 1.9143   | 0.634   | -1.59426219  | 2.13E-05    | ** |
| siR_352656 | 2.5169   | 0.01    | -7.97550407  | 2.57E-21    | ** |
| siR_352692 | 2.5878   | 0.01    | -8.0155823   | 6.75E-22    | ** |
| siR_352696 | 1.8788   | 0.01    | -7.55366769  | 4.29E-16    | ** |
| siR_352697 | 1.3116   | 0.01    | -7.035184    | 1.88E-11    | ** |
| siR_3527   | 1.2053   | 0.4848  | -1.31393068  | 0.003684871 | ** |
| siR_35270  | 4.7503   | 1.7155  | -1.4693895   | 2.22E-10    | ** |
| siR_352701 | 1.8434   | 0.01    | -7.52622535  | 8.37E-16    | ** |
| siR_352710 | 1.737    | 0.01    | -7.44045394  | 6.21E-15    | ** |
| siR_352724 | 3.2968   | 0.01    | -8.36492254  | 1.06E-27    | ** |
| siR_35274  | 2.5169   | 0.7459  | -1.75459377  | 1.70E-07    | ** |
| siR_352772 | 1.0989   | 0.01    | -6.7799163   | 1.04E-09    | ** |
| siR_352807 | 5.4238   | 0.01    | -9.08316017  | 4.14E-45    | ** |
| siR_352883 | 1.9143   | 0.01    | -7.58067313  | 2.20E-16    | ** |
| siR_352894 | 1.8434   | 0.01    | -7.52622535  | 8.37E-16    | ** |
| siR_35294  | 15.0308  | 12.2324 | -0.29721431  | 0.004984535 |    |
| siR_352948 | 13.4355  | 0.01    | -10.39183435 | 1.10E-110   | ** |
| siR_352952 | 188.2747 | 0.01    | -14.20055101 | 0           | ** |
| siR_352963 | 1.2407   | 0.01    | -6.95501051  | 7.17E-11    | ** |
| siR_352980 | 1.8079   | 0.01    | -7.49817107  | 1.63E-15    | ** |
| siR_35300  | 0.01     | 1.1188  | 6.80580835   | 4.20E-10    | ** |
| siR_353030 | 1.8788   | 0.01    | -7.55366769  | 4.29E-16    | ** |
| siR_35308  | 0.01     | 13.4258 | 10.39079234  | 4.02E-113   | ** |
| siR_353099 | 1.2762   | 0.01    | -6.99571063  | 3.67E-11    | ** |
| siR_35311  | 0.01     | 11.934  | 10.22086197  | 1.23E-100   | ** |
| siR_353208 | 2.8005   | 0.01    | -8.12954063  | 1.23E-23    | ** |
| siR_353249 | 2.836    | 0.01    | -8.14771372  | 6.28E-24    | ** |
| siR_35352  | 1.028    | 0.2611  | -1.9771659   | 0.000342937 | ** |

|            |         |         |              |             |    |
|------------|---------|---------|--------------|-------------|----|
| siR_353537 | 5.7429  | 0.01    | -9.16563566  | 1.01E-47    | ** |
| siR_35355  | 1.3116  | 0.7832  | -0.74387514  | 0.057586901 |    |
| siR_353556 | 1.2762  | 0.01    | -6.99571063  | 3.67E-11    | ** |
| siR_35356  | 0.9217  | 1.7528  | 0.92729223   | 0.007524723 |    |
| siR_35358  | 1.3471  | 1.268   | -0.08730221  | 0.802228468 |    |
| siR_353583 | 9.8196  | 0.01    | -9.93952048  | 4.33E-81    | ** |
| siR_353616 | 1.2407  | 0.01    | -6.95501051  | 7.17E-11    | ** |
| siR_35362  | 0.01    | 4.438   | 8.79376586   | 6.91E-38    | ** |
| siR_353642 | 2.3751  | 0.01    | -7.89184446  | 3.72E-20    | ** |
| siR_353684 | 3.7577  | 0.01    | -8.5537061   | 1.79E-31    | ** |
| siR_353730 | 1.5952  | 0.01    | -7.31759351  | 8.99E-14    | ** |
| siR_353733 | 2.5169  | 0.01    | -7.97550407  | 2.57E-21    | ** |
| siR_35377  | 1.4889  | 0.7459  | -0.99719273  | 0.009388402 |    |
| siR_3538   | 3.2968  | 2.7597  | -0.25655492  | 0.255097475 |    |
| siR_353820 | 3.0487  | 0.01    | -8.25205038  | 1.14E-25    | ** |
| siR_35383  | 2.0206  | 1.2307  | -0.71530462  | 0.022165921 |    |
| siR_35385  | 6.4519  | 1.1188  | -2.52777192  | 2.60E-26    | ** |
| siR_353864 | 10.954  | 0.01    | -10.09724211 | 2.25E-90    | ** |
| siR_35391  | 60.8321 | 13.0156 | -2.22459099  | 1.36E-201   | ** |
| siR_35395  | 1.028   | 0.2611  | -1.9771659   | 0.000342937 | ** |
| siR_353958 | 4.3249  | 0.01    | -8.75652296  | 4.09E-36    | ** |
| siR_3540   | 8.7561  | 5.7805  | -0.59909414  | 4.21E-05    |    |
| siR_354029 | 4.4312  | 0.01    | -8.79155366  | 5.51E-37    | ** |
| siR_35404  | 0.01    | 1.5663  | 7.29121675   | 7.54E-14    | ** |
| siR_354064 | 2.0206  | 0.01    | -7.65863995  | 2.96E-17    | ** |
| siR_354081 | 9.4297  | 0.01    | -9.8810681   | 6.74E-78    | ** |
| siR_354082 | 4.7503  | 0.01    | -8.89187482  | 1.35E-39    | ** |
| siR_354085 | 2.6587  | 0.01    | -8.05457718  | 1.77E-22    | ** |
| siR_354087 | 4.8566  | 0.01    | -8.92380283  | 1.82E-40    | ** |
| siR_354089 | 23.007  | 0.01    | -11.16785724 | 4.99E-189   | ** |
| siR_354095 | 1.3116  | 0.01    | -7.035184    | 1.88E-11    | ** |
| siR_354097 | 1.028   | 0.01    | -6.68369645  | 3.95E-09    | ** |
| siR_3542   | 8.118   | 4.2515  | -0.9331524   | 6.90E-09    |    |
| siR_354235 | 2.5878  | 0.01    | -8.0155823   | 6.75E-22    | ** |
| siR_354241 | 3.5804  | 0.01    | -8.48397698  | 5.07E-30    | ** |
| siR_35429  | 1.5243  | 0.5594  | -1.44619471  | 0.000426884 | ** |
| siR_354331 | 11.5567 | 0.01    | -10.17451381 | 2.63E-95    | ** |
| siR_354332 | 30.6642 | 0.01    | -11.58233954 | 1.06E-251   | ** |
| siR_354333 | 1.7016  | 0.01    | -7.41074813  | 1.21E-14    | ** |
| siR_354357 | 1.3116  | 0.01    | -7.035184    | 1.88E-11    | ** |
| siR_354463 | 1.028   | 0.01    | -6.68369645  | 3.95E-09    | ** |
| siR_354560 | 4.4312  | 0.01    | -8.79155366  | 5.51E-37    | ** |
| siR_3546   | 0.01    | 1.5663  | 7.29121675   | 7.54E-14    | ** |
| siR_35464  | 6.4873  | 3.431   | -0.91898903  | 3.22E-07    |    |
| siR_354709 | 2.4106  | 0.01    | -7.91324847  | 1.91E-20    | ** |
| siR_354784 | 3.3677  | 0.01    | -8.39561983  | 2.79E-28    | ** |
| siR_354785 | 1.2407  | 0.01    | -6.95501051  | 7.17E-11    | ** |

|            |         |        |              |             |    |
|------------|---------|--------|--------------|-------------|----|
| siR_354825 | 1.1698  | 0.01   | -6.87011809  | 2.73E-10    | ** |
| siR_354902 | 3.0132  | 0.01   | -8.23515263  | 2.23E-25    | ** |
| siR_3550   | 0.01    | 2.4241 | 7.9213054    | 4.98E-21    | ** |
| siR_355008 | 2.3751  | 0.01   | -7.89184446  | 3.72E-20    | ** |
| siR_355010 | 1.0635  | 0.01   | -6.73267622  | 2.02E-09    | ** |
| siR_35502  | 0.8862  | 1.3426 | 0.59932532   | 0.109876009 |    |
| siR_355174 | 3.3677  | 0.01   | -8.39561983  | 2.79E-28    | ** |
| siR_355245 | 1.5243  | 0.01   | -7.25200305  | 3.42E-13    | ** |
| siR_35530  | 1.0635  | 0.4475 | -1.24886045  | 0.008857046 | ** |
| siR_355339 | 3.6513  | 0.01   | -8.51226639  | 1.33E-30    | ** |
| siR_35534  | 0.01    | 1.4918 | 7.22091032   | 3.17E-13    | ** |
| siR_355402 | 1.1698  | 0.01   | -6.87011809  | 2.73E-10    | ** |
| siR_355412 | 1.028   | 0.01   | -6.68369645  | 3.95E-09    | ** |
| siR_355415 | 8.1889  | 0.01   | -9.6775259   | 9.64E-68    | ** |
| siR_355435 | 7.5154  | 0.01   | -9.55370604  | 3.14E-62    | ** |
| siR_355489 | 13.2583 | 0.01   | -10.37268011 | 3.10E-109   | ** |
| siR_35556  | 2.2688  | 0.9323 | -1.28306327  | 8.18E-05    | ** |
| siR_355594 | 5.9556  | 0.01   | -9.21810309  | 1.84E-49    | ** |
| siR_35564  | 0.01    | 1.6409 | 7.35834351   | 1.79E-14    | ** |
| siR_355650 | 1.028   | 0.01   | -6.68369645  | 3.95E-09    | ** |
| siR_35568  | 3.8995  | 0.8578 | -2.18457593  | 4.55E-14    | ** |
| siR_355766 | 11.4149 | 0.01   | -10.15670246 | 3.80E-94    | ** |
| siR_355799 | 2.6587  | 0.01   | -8.05457718  | 1.77E-22    | ** |
| siR_355917 | 1.3825  | 0.01   | -7.11113566  | 4.95E-12    | ** |
| siR_355987 | 25.524  | 0.01   | -11.3176388  | 1.25E-209   | ** |
| siR_355990 | 43.4262 | 0.01   | -12.0843502  | 0           | ** |
| siR_356030 | 1.0635  | 0.01   | -6.73267622  | 2.02E-09    | ** |
| siR_356033 | 1.418   | 0.01   | -7.14771372  | 2.54E-12    | ** |
| siR_356054 | 3.1196  | 0.01   | -8.28521723  | 3.00E-26    | ** |
| siR_356057 | 32.7912 | 0.01   | -11.67909283 | 4.11E-269   | ** |
| siR_356058 | 1.3116  | 0.01   | -7.035184    | 1.88E-11    | ** |
| siR_356060 | 2.1979  | 0.01   | -7.77998195  | 1.05E-18    | ** |
| siR_356092 | 31.196  | 0.01   | -11.60714542 | 4.69E-256   | ** |
| siR_356159 | 1.2762  | 0.01   | -6.99571063  | 3.67E-11    | ** |
| siR_35616  | 1.418   | 0.1119 | -3.66357559  | 4.20E-09    | ** |
| siR_356239 | 4.1476  | 0.01   | -8.69613295  | 1.15E-34    | ** |
| siR_35628  | 1.9497  | 1.4172 | -0.46020878  | 0.130794452 |    |
| siR_356294 | 2.9778  | 0.01   | -8.21810305  | 4.34E-25    | ** |
| siR_356327 | 7.5154  | 0.01   | -9.55370604  | 3.14E-62    | ** |
| siR_356335 | 2.4106  | 0.01   | -7.91324847  | 1.91E-20    | ** |
| siR_356342 | 77.8835 | 0.01   | -12.92710201 | 0           | ** |
| siR_356343 | 4.6085  | 0.01   | -8.84815347  | 1.95E-38    | ** |
| siR_356349 | 92.5953 | 0.01   | -13.17672381 | 0           | ** |
| siR_356350 | 2.0915  | 0.01   | -7.70839418  | 7.79E-18    | ** |
| siR_356362 | 1.2407  | 0.01   | -6.95501051  | 7.17E-11    | ** |
| siR_3564   | 1.5598  | 0.0746 | -4.38604162  | 4.71E-11    | ** |
| siR_356453 | 1.1698  | 0.01   | -6.87011809  | 2.73E-10    | ** |

|            |         |         |              |             |    |
|------------|---------|---------|--------------|-------------|----|
| siR_356463 | 1.1344  | 0.01    | -6.82578563  | 5.32E-10    | ** |
| siR_35655  | 1.0989  | 1.0442  | -0.07366204  | 0.849549666 |    |
| siR_356613 | 1.2407  | 0.01    | -6.95501051  | 7.17E-11    | ** |
| siR_35662  | 1.8788  | 1.6036  | -0.22849718  | 0.444091037 |    |
| siR_356681 | 1.2407  | 0.01    | -6.95501051  | 7.17E-11    | ** |
| siR_35669  | 3.0487  | 0.6713  | -2.18316464  | 2.79E-11    | ** |
| siR_35672  | 2.7296  | 0.7459  | -1.87163542  | 1.23E-08    | ** |
| siR_356769 | 1.1344  | 0.01    | -6.82578563  | 5.32E-10    | ** |
| siR_356797 | 1.3116  | 0.01    | -7.035184    | 1.88E-11    | ** |
| siR_356801 | 75.2248 | 0.01    | -12.87699247 | 0           | ** |
| siR_356845 | 23.9642 | 0.01    | -11.22666514 | 7.30E-197   | ** |
| siR_356846 | 2.127   | 0.01    | -7.73267621  | 3.99E-18    | ** |
| siR_356931 | 1.6661  | 0.01    | -7.38033118  | 2.36E-14    | ** |
| siR_35706  | 14.0027 | 11.7103 | -0.257927    | 0.01788635  |    |
| siR_35709  | 73.9841 | 67.2408 | -0.13787836  | 0.002936969 |    |
| siR_35715  | 47.9283 | 26.2549 | -0.86829107  | 3.45E-40    |    |
| siR_35716  | 1.4889  | 0.3356  | -2.14943224  | 4.80E-06    | ** |
| siR_357163 | 1.9497  | 0.01    | -7.60710834  | 1.13E-16    | ** |
| siR_357176 | 21.0573 | 0.01    | -11.04010472 | 4.54E-173   | ** |
| siR_35723  | 0.01    | 4.4753  | 8.80584059   | 3.37E-38    | ** |
| siR_35731  | 0.01    | 2.4987  | 7.96503389   | 1.18E-21    | ** |
| siR_357395 | 1.1344  | 0.01    | -6.82578563  | 5.32E-10    | ** |
| siR_357396 | 1.2407  | 0.01    | -6.95501051  | 7.17E-11    | ** |
| siR_357464 | 1.9143  | 0.01    | -7.58067313  | 2.20E-16    | ** |
| siR_357471 | 1.3116  | 0.01    | -7.035184    | 1.88E-11    | ** |
| siR_357486 | 99.8271 | 0.01    | -13.28521579 | 0           | ** |
| siR_357487 | 1.6307  | 0.01    | -7.34934759  | 4.61E-14    | ** |
| siR_35754  | 6.4519  | 4.065   | -0.66646873  | 0.000112251 |    |
| siR_357543 | 1.7725  | 0.01    | -7.46964183  | 3.18E-15    | ** |
| siR_357557 | 9.4651  | 0.01    | -9.8864739   | 3.46E-78    | ** |
| siR_35761  | 0.01    | 1.1561  | 6.85312238   | 2.05E-10    | ** |
| siR_357742 | 1.4534  | 0.01    | -7.18328801  | 1.30E-12    | ** |
| siR_357822 | 1.3116  | 0.01    | -7.035184    | 1.88E-11    | ** |
| siR_357833 | 1.6307  | 0.01    | -7.34934759  | 4.61E-14    | ** |
| siR_35790  | 9.9969  | 9.137   | -0.12976023  | 0.303890808 |    |
| siR_35816  | 2.5878  | 1.268   | -1.02917138  | 0.000412964 | ** |
| siR_358211 | 10.1741 | 0.01    | -9.9906855   | 5.44E-84    | ** |
| siR_358215 | 2.6587  | 0.01    | -8.05457718  | 1.77E-22    | ** |
| siR_35822  | 0.01    | 7.9436  | 9.63364917   | 3.12E-67    | ** |
| siR_35827  | 0.01    | 1.0815  | 6.75688986   | 8.62E-10    | ** |
| siR_35830  | 0.01    | 1.3799  | 7.10841991   | 2.74E-12    | ** |
| siR_358314 | 2.8005  | 0.01    | -8.12954063  | 1.23E-23    | ** |
| siR_358346 | 3.8995  | 0.01    | -8.60714536  | 1.24E-32    | ** |
| siR_358364 | 1.0989  | 0.01    | -6.7799163   | 1.04E-09    | ** |
| siR_35844  | 0.01    | 1.0069  | 6.6537766    | 3.63E-09    | ** |
| siR_35846  | 4.3249  | 0.5594  | -2.95071462  | 4.23E-21    | ** |
| siR_358493 | 3.6868  | 0.01    | -8.52622535  | 6.83E-31    | ** |

|            |         |        |              |             |    |
|------------|---------|--------|--------------|-------------|----|
| siR_358517 | 1.2762  | 0.01   | -6.99571063  | 3.67E-11    | ** |
| siR_35852  | 3.1196  | 1.0815 | -1.52832739  | 1.27E-07    | ** |
| siR_35854  | 2.6587  | 0.7086 | -1.90767763  | 1.25E-08    | ** |
| siR_358619 | 42.0791 | 0.01   | -12.03888794 | 0           | ** |
| siR_358622 | 18.6467 | 0.01   | -10.86470468 | 2.44E-153   | ** |
| siR_35866  | 2.9778  | 1.3426 | -1.14921731  | 3.39E-05    | ** |
| siR_358668 | 1.9497  | 0.01   | -7.60710834  | 1.13E-16    | ** |
| siR_35867  | 3.9704  | 1.4172 | -1.48624099  | 5.04E-09    | ** |
| siR_358673 | 1.6307  | 0.01   | -7.34934759  | 4.61E-14    | ** |
| siR_35868  | 3.2614  | 1.6409 | -0.99100407  | 0.000118932 |    |
| siR_35869  | 1.0635  | 1.268  | 0.25373471   | 0.483433973 |    |
| siR_358709 | 1.5598  | 0.01   | -7.28521726  | 1.75E-13    | ** |
| siR_358712 | 11.0604 | 0.01   | -10.1111879  | 3.03E-91    | ** |
| siR_358714 | 5.8847  | 0.01   | -9.20082503  | 6.99E-49    | ** |
| siR_358718 | 6.6291  | 0.01   | -9.37266921  | 5.64E-55    | ** |
| siR_358758 | 2.836   | 0.01   | -8.14771372  | 6.28E-24    | ** |
| siR_358781 | 1.5243  | 0.01   | -7.25200305  | 3.42E-13    | ** |
| siR_358803 | 1.5952  | 0.01   | -7.31759351  | 8.99E-14    | ** |
| siR_35889  | 1.3825  | 0.4102 | -1.75288008  | 0.0001191   | ** |
| siR_358895 | 1.418   | 0.01   | -7.14771372  | 2.54E-12    | ** |
| siR_358900 | 1.2762  | 0.01   | -6.99571063  | 3.67E-11    | ** |
| siR_358921 | 1.1698  | 0.01   | -6.87011809  | 2.73E-10    | ** |
| siR_358936 | 1.0989  | 0.01   | -6.7799163   | 1.04E-09    | ** |
| siR_358989 | 1.2762  | 0.01   | -6.99571063  | 3.67E-11    | ** |
| siR_359060 | 2.9069  | 0.01   | -8.18333764  | 1.65E-24    | ** |
| siR_359150 | 1.3825  | 0.01   | -7.11113566  | 4.95E-12    | ** |
| siR_359154 | 2.5878  | 0.01   | -8.0155823   | 6.75E-22    | ** |
| siR_359176 | 1.3471  | 0.01   | -7.07371314  | 9.66E-12    | ** |
| siR_359249 | 11.2731 | 0.01   | -10.13866865 | 5.50E-93    | ** |
| siR_359265 | 2.0915  | 0.01   | -7.70839418  | 7.79E-18    | ** |
| siR_359306 | 2.6942  | 0.01   | -8.07371315  | 9.10E-23    | ** |
| siR_359309 | 1.418   | 0.01   | -7.14771372  | 2.54E-12    | ** |
| siR_359319 | 2.5878  | 0.01   | -8.0155823   | 6.75E-22    | ** |
| siR_359329 | 4.9275  | 0.01   | -8.94471205  | 4.77E-41    | ** |
| siR_359667 | 2.4815  | 0.01   | -7.95506863  | 5.01E-21    | ** |
| siR_359847 | 1.4534  | 0.01   | -7.18328801  | 1.30E-12    | ** |
| siR_359865 | 2.5878  | 0.01   | -8.0155823   | 6.75E-22    | ** |
| siR_359867 | 1.5598  | 0.01   | -7.28521726  | 1.75E-13    | ** |
| siR_35989  | 0.01    | 2.3868 | 7.89893387   | 1.02E-20    | ** |
| siR_36     | 5.9556  | 3.2446 | -0.87620623  | 2.57E-06    |    |
| siR_36002  | 1.2762  | 0.4475 | -1.51189485  | 0.000890445 | ** |
| siR_360042 | 1.5243  | 0.01   | -7.25200305  | 3.42E-13    | ** |
| siR_360050 | 3.3323  | 0.01   | -8.38037447  | 5.44E-28    | ** |
| siR_360062 | 1.5598  | 0.01   | -7.28521726  | 1.75E-13    | ** |
| siR_360063 | 1.4889  | 0.01   | -7.21810305  | 6.67E-13    | ** |
| siR_360064 | 1.3825  | 0.01   | -7.11113566  | 4.95E-12    | ** |
| siR_360114 | 3.4032  | 0.01   | -8.41074813  | 1.43E-28    | ** |

|            |         |        |              |             |    |
|------------|---------|--------|--------------|-------------|----|
| siR_360128 | 1.0635  | 0.01   | -6.73267622  | 2.02E-09    | ** |
| siR_360178 | 1.0989  | 0.01   | -6.7799163   | 1.04E-09    | ** |
| siR_360191 | 21.9435 | 0.01   | -11.09957799 | 2.53E-180   | ** |
| siR_360256 | 1.0989  | 0.01   | -6.7799163   | 1.04E-09    | ** |
| siR_360339 | 1.2407  | 0.01   | -6.95501051  | 7.17E-11    | ** |
| siR_360344 | 1.0635  | 0.01   | -6.73267622  | 2.02E-09    | ** |
| siR_360363 | 1.737   | 0.01   | -7.44045394  | 6.21E-15    | ** |
| siR_360373 | 1.4534  | 0.01   | -7.18328801  | 1.30E-12    | ** |
| siR_36041  | 3.7577  | 2.2749 | -0.72404676  | 0.001553669 |    |
| siR_360480 | 1.6307  | 0.01   | -7.34934759  | 4.61E-14    | ** |
| siR_360506 | 1.3825  | 0.01   | -7.11113566  | 4.95E-12    | ** |
| siR_360598 | 2.3042  | 0.01   | -7.84812212  | 1.41E-19    | ** |
| siR_36061  | 0.01    | 1.7155 | 7.42248532   | 4.25E-15    | ** |
| siR_360655 | 1.8434  | 0.01   | -7.52622535  | 8.37E-16    | ** |
| siR_36071  | 2.4815  | 1.3426 | -0.88618291  | 0.002269145 |    |
| siR_360716 | 6.7355  | 0.01   | -9.39564121  | 7.60E-56    | ** |
| siR_360775 | 7.4445  | 0.01   | -9.5400311   | 1.20E-61    | ** |
| siR_360797 | 1.028   | 0.01   | -6.68369645  | 3.95E-09    | ** |
| siR_360799 | 18.0795 | 0.01   | -10.82013917 | 1.07E-148   | ** |
| siR_36081  | 1.4534  | 0.4102 | -1.82503241  | 4.93E-05    | ** |
| siR_360819 | 3.6513  | 0.01   | -8.51226639  | 1.33E-30    | ** |
| siR_360825 | 1.3825  | 0.01   | -7.11113566  | 4.95E-12    | ** |
| siR_360826 | 3.4386  | 0.01   | -8.42567749  | 7.34E-29    | ** |
| siR_360829 | 2.6942  | 0.01   | -8.07371315  | 9.10E-23    | ** |
| siR_360833 | 2.127   | 0.01   | -7.73267621  | 3.99E-18    | ** |
| siR_360981 | 1.1698  | 0.01   | -6.87011809  | 2.73E-10    | ** |
| siR_360986 | 1.5952  | 0.01   | -7.31759351  | 8.99E-14    | ** |
| siR_361036 | 2.3397  | 0.01   | -7.87017976  | 7.25E-20    | ** |
| siR_361048 | 44.4897 | 0.01   | -12.11925583 | 0           | ** |
| siR_361049 | 20.6319 | 0.01   | -11.01066108 | 1.38E-169   | ** |
| siR_361130 | 1.8434  | 0.01   | -7.52622535  | 8.37E-16    | ** |
| siR_36114  | 4.2185  | 2.0885 | -1.01426296  | 7.94E-06    | ** |
| siR_361191 | 1.2762  | 0.01   | -6.99571063  | 3.67E-11    | ** |
| siR_361232 | 4.1831  | 0.01   | -8.70842867  | 5.92E-35    | ** |
| siR_36124  | 2.9069  | 1.0442 | -1.47708338  | 6.68E-07    | ** |
| siR_361262 | 2.0561  | 0.01   | -7.68376661  | 1.52E-17    | ** |
| siR_36127  | 0.01    | 5.6687 | 9.14687411   | 3.45E-48    | ** |
| siR_361278 | 1.2053  | 0.01   | -6.91324847  | 1.40E-10    | ** |
| siR_361288 | 3.155   | 0.01   | -8.3014962   | 1.54E-26    | ** |
| siR_361292 | 2.0206  | 0.01   | -7.65863995  | 2.96E-17    | ** |
| siR_3614   | 1.9497  | 1.2307 | -0.66377303  | 0.035430769 |    |
| siR_36141  | 1.028   | 0.2611 | -1.9771659   | 0.000342937 | ** |
| siR_361584 | 2.5524  | 0.01   | -7.99571063  | 1.32E-21    | ** |
| siR_3616   | 1.2762  | 0.7086 | -0.84881107  | 0.035970454 |    |
| siR_36160  | 10.1741 | 7.6825 | -0.40525341  | 0.002003657 |    |
| siR_36163  | 0.9571  | 1.0442 | 0.12565649   | 0.745938859 |    |
| siR_36164  | 1.4534  | 1.0069 | -0.5295114   | 0.13923808  |    |

|            |          |         |              |             |    |
|------------|----------|---------|--------------|-------------|----|
| siR_361675 | 4.9984   | 0.01    | -8.96532255  | 1.25E-41    | ** |
| siR_36170  | 0.01     | 1.529   | 7.2564446    | 1.55E-13    | ** |
| siR_36173  | 2.9423   | 1.5663  | -0.90958379  | 0.000670857 |    |
| siR_36176  | 0.01     | 1.3426  | 7.06888574   | 5.63E-12    | ** |
| siR_361859 | 1.028    | 0.01    | -6.68369645  | 3.95E-09    | ** |
| siR_361887 | 2.3751   | 0.01    | -7.89184446  | 3.72E-20    | ** |
| siR_36189  | 1.3471   | 0.4475  | -1.58989736  | 0.000394142 | ** |
| siR_3619   | 1.7725   | 1.1934  | -0.57070795  | 0.079955194 |    |
| siR_36194  | 0.01     | 23.2714 | 11.18434229  | 1.54E-195   | ** |
| siR_361975 | 2.1979   | 0.01    | -7.77998195  | 1.05E-18    | ** |
| siR_362021 | 118.261  | 0.01    | -13.52968728 | 0           | ** |
| siR_362022 | 1.9852   | 0.01    | -7.63314056  | 5.78E-17    | ** |
| siR_36205  | 0.01     | 10.9644 | 10.09861115  | 1.61E-92    | ** |
| siR_362057 | 6.0974   | 0.01    | -9.25205038  | 1.27E-50    | ** |
| siR_362061 | 13.5064  | 0.01    | -10.39942755 | 2.89E-111   | ** |
| siR_362069 | 6.4519   | 0.01    | -9.33358029  | 1.59E-53    | ** |
| siR_362087 | 1.9143   | 0.01    | -7.58067313  | 2.20E-16    | ** |
| siR_362095 | 1.9497   | 0.01    | -7.60710834  | 1.13E-16    | ** |
| siR_362167 | 3.2968   | 0.01    | -8.36492254  | 1.06E-27    | ** |
| siR_362255 | 2.6233   | 0.01    | -8.035239    | 3.46E-22    | ** |
| siR_362263 | 15.0308  | 0.01    | -10.55370604 | 9.63E-124   | ** |
| siR_362265 | 6.5582   | 0.01    | -9.35715612  | 2.15E-54    | ** |
| siR_362274 | 2.1624   | 0.01    | -7.75648961  | 2.05E-18    | ** |
| siR_362316 | 3.2614   | 0.01    | -8.34934759  | 2.07E-27    | ** |
| siR_36233  | 25.6303  | 5.2584  | -2.28515457  | 7.96E-89    | ** |
| siR_362336 | 3.6513   | 0.01    | -8.51226639  | 1.33E-30    | ** |
| siR_362338 | 2.8714   | 0.01    | -8.16561052  | 3.22E-24    | ** |
| siR_36236  | 0.01     | 1.7155  | 7.42248532   | 4.25E-15    | ** |
| siR_36252  | 5.2111   | 1.1934  | -2.12651026  | 8.97E-18    | ** |
| siR_362524 | 1.6307   | 0.01    | -7.34934759  | 4.61E-14    | ** |
| siR_362536 | 1.1344   | 0.01    | -6.82578563  | 5.32E-10    | ** |
| siR_36260  | 0.01     | 1.3799  | 7.10841991   | 2.74E-12    | ** |
| siR_36262  | 249.9576 | 54.3372 | -2.20167126  | 0           | ** |
| siR_362623 | 6.0974   | 0.01    | -9.25205038  | 1.27E-50    | ** |
| siR_36263  | 2.1979   | 0.5967  | -1.88104807  | 3.08E-07    | ** |
| siR_362632 | 1.5598   | 0.01    | -7.28521726  | 1.75E-13    | ** |
| siR_36268  | 6.4519   | 1.902   | -1.76220683  | 3.24E-17    | ** |
| siR_362707 | 1.2407   | 0.01    | -6.95501051  | 7.17E-11    | ** |
| siR_362727 | 1.5598   | 0.01    | -7.28521726  | 1.75E-13    | ** |
| siR_36273  | 0.01     | 1.1188  | 6.80580835   | 4.20E-10    | ** |
| siR_36275  | 0.01     | 2.1258  | 7.73186206   | 1.57E-18    | ** |
| siR_362811 | 23.397   | 0.01    | -11.19210792 | 3.21E-192   | ** |
| siR_362815 | 2.8005   | 0.01    | -8.12954063  | 1.23E-23    | ** |
| siR_362834 | 1.2053   | 0.01    | -6.91324847  | 1.40E-10    | ** |
| siR_362983 | 11.0249  | 0.01    | -10.10654986 | 5.91E-91    | ** |
| siR_363367 | 24.1769  | 0.01    | -11.23941341 | 1.33E-198   | ** |
| siR_363495 | 9.4651   | 0.01    | -9.8864739   | 3.46E-78    | ** |

|            |          |         |              |             |    |
|------------|----------|---------|--------------|-------------|----|
| siR_3635   | 5.282    | 1.7528  | -1.59142291  | 1.27E-12    | ** |
| siR_363638 | 22.9361  | 0.01    | -11.16340443 | 1.90E-188   | ** |
| siR_363640 | 449.4345 | 0.01    | -15.45582217 | 0           | ** |
| siR_363641 | 1.3471   | 0.01    | -7.07371314  | 9.66E-12    | ** |
| siR_363690 | 3.7931   | 0.01    | -8.56723361  | 9.20E-32    | ** |
| siR_363691 | 1.5243   | 0.01    | -7.25200305  | 3.42E-13    | ** |
| siR_36382  | 1.8788   | 0.8951  | -1.06969073  | 0.001948509 | ** |
| siR_36383  | 1.4889   | 0.7832  | -0.92679419  | 0.01451267  |    |
| siR_36388  | 8.4016   | 5.5195  | -0.60612652  | 5.05E-05    |    |
| siR_363881 | 2.2688   | 0.01    | -7.82578561  | 2.76E-19    | ** |
| siR_36389  | 6.3455   | 3.5802  | -0.82569366  | 3.92E-06    |    |
| siR_363914 | 2.0206   | 0.01    | -7.65863995  | 2.96E-17    | ** |
| siR_36408  | 2.6233   | 1.7155  | -0.61275368  | 0.022775088 |    |
| siR_364088 | 9.8551   | 0.01    | -9.94472677  | 2.22E-81    | ** |
| siR_364089 | 1.4889   | 0.01    | -7.21810305  | 6.67E-13    | ** |
| siR_36414  | 1.1698   | 1.1188  | -0.06430974  | 0.864211392 |    |
| siR_364173 | 13.5064  | 0.01    | -10.39942755 | 2.89E-111   | ** |
| siR_364180 | 24.9922  | 0.01    | -11.28726233 | 2.81E-205   | ** |
| siR_364181 | 3.9349   | 0.01    | -8.62018319  | 6.36E-33    | ** |
| siR_36421  | 1.6307   | 1.902   | 0.22202585   | 0.449447402 |    |
| siR_364219 | 1.9497   | 0.01    | -7.60710834  | 1.13E-16    | ** |
| siR_36439  | 2.2688   | 1.0069  | -1.17200903  | 0.000243594 | ** |
| siR_364407 | 1.418    | 0.01    | -7.14771372  | 2.54E-12    | ** |
| siR_364416 | 3.4386   | 0.01    | -8.42567749  | 7.34E-29    | ** |
| siR_36448  | 2.0206   | 1.0442  | -0.95238569  | 0.003482778 |    |
| siR_364530 | 5.3175   | 0.01    | -9.0546043   | 3.07E-44    | ** |
| siR_364632 | 1.4889   | 0.01    | -7.21810305  | 6.67E-13    | ** |
| siR_364654 | 3.6159   | 0.01    | -8.49821097  | 2.60E-30    | ** |
| siR_364707 | 1.7725   | 0.01    | -7.46964183  | 3.18E-15    | ** |
| siR_36472  | 0.01     | 1.1561  | 6.85312238   | 2.05E-10    | ** |
| siR_364722 | 2.1979   | 0.01    | -7.77998195  | 1.05E-18    | ** |
| siR_36475  | 2.6233   | 1.1188  | -1.22943064  | 4.11E-05    | ** |
| siR_364817 | 4.8566   | 0.01    | -8.92380283  | 1.82E-40    | ** |
| siR_364818 | 1.5243   | 0.01    | -7.25200305  | 3.42E-13    | ** |
| siR_36482  | 0.01     | 1.9393  | 7.59939219   | 5.69E-17    | ** |
| siR_364822 | 1.3116   | 0.01    | -7.035184    | 1.88E-11    | ** |
| siR_36484  | 25.9848  | 10.1812 | -1.35176034  | 2.10E-44    | ** |
| siR_364982 | 49.7717  | 0.01    | -12.28110987 | 0           | ** |
| siR_365007 | 1.3116   | 0.01    | -7.035184    | 1.88E-11    | ** |
| siR_36503  | 0.01     | 1.8647  | 7.54279973   | 2.40E-16    | ** |
| siR_365072 | 1.1344   | 0.01    | -6.82578563  | 5.32E-10    | ** |
| siR_36509  | 1.2762   | 0.4102  | -1.63745504  | 0.000431216 | ** |
| siR_36511  | 0.01     | 1.0815  | 6.75688986   | 8.62E-10    | ** |
| siR_36516  | 2.5524   | 1.6409  | -0.63736712  | 0.020019747 |    |
| siR_365217 | 2.7651   | 0.01    | -8.11118786  | 2.39E-23    | ** |
| siR_365266 | 1.3116   | 0.01    | -7.035184    | 1.88E-11    | ** |
| siR_3653   | 0.01     | 2.0512  | 7.68032436   | 6.59E-18    | ** |



|            |         |        |              |             |    |
|------------|---------|--------|--------------|-------------|----|
| siR_365341 | 6.9482  | 0.01   | -9.44049544  | 1.38E-57    | ** |
| siR_365357 | 1.8434  | 0.01   | -7.52622535  | 8.37E-16    | ** |
| siR_36546  | 2.2333  | 0.6713 | -1.73414751  | 1.06E-06    | ** |
| siR_3655   | 1.028   | 0.5221 | -0.9774422   | 0.034659916 |    |
| siR_365505 | 9.7842  | 0.01   | -9.93431004  | 8.45E-81    | ** |
| siR_365553 | 1.2407  | 0.01   | -6.95501051  | 7.17E-11    | ** |
| siR_365576 | 1.2407  | 0.01   | -6.95501051  | 7.17E-11    | ** |
| siR_365580 | 1.2762  | 0.01   | -6.99571063  | 3.67E-11    | ** |
| siR_365600 | 36.2653 | 0.01   | -11.82437399 | 1.51E-297   | ** |
| siR_365604 | 4.8921  | 0.01   | -8.93431011  | 9.31E-41    | ** |
| siR_365608 | 2.127   | 0.01   | -7.73267621  | 3.99E-18    | ** |
| siR_365706 | 1.3825  | 0.01   | -7.11113566  | 4.95E-12    | ** |
| siR_365796 | 1.3116  | 0.01   | -7.035184    | 1.88E-11    | ** |
| siR_3658   | 0.01    | 2.0885 | 7.70632333   | 3.21E-18    | ** |
| siR_365821 | 2.4815  | 0.01   | -7.95506863  | 5.01E-21    | ** |
| siR_365877 | 1.4534  | 0.01   | -7.18328801  | 1.30E-12    | ** |
| siR_365893 | 15.7043 | 0.01   | -10.61694386 | 2.96E-129   | ** |
| siR_365897 | 7.6572  | 0.01   | -9.58067313  | 2.17E-63    | ** |
| siR_36590  | 0.01    | 1.1561 | 6.85312238   | 2.05E-10    | ** |
| siR_365901 | 4.7148  | 0.01   | -8.88105279  | 2.63E-39    | ** |
| siR_365951 | 1.418   | 0.01   | -7.14771372  | 2.54E-12    | ** |
| siR_36600  | 0.01    | 1.1188 | 6.80580835   | 4.20E-10    | ** |
| siR_36612  | 0.01    | 4.7736 | 8.89893387   | 1.07E-40    | ** |
| siR_366153 | 5.6011  | 0.01   | -9.12956637  | 1.46E-46    | ** |
| siR_36618  | 10.7059 | 11.039 | 0.04420341   | 0.707215279 |    |
| siR_36621  | 0.01    | 1.3799 | 7.10841991   | 2.74E-12    | ** |
| siR_366211 | 3.8995  | 0.01   | -8.60714536  | 1.24E-32    | ** |
| siR_36623  | 0.01    | 1.5663 | 7.29121675   | 7.54E-14    | ** |
| siR_36643  | 0.01    | 4.2888 | 8.74443023   | 1.22E-36    | ** |
| siR_36653  | 5.0339  | 1.268  | -1.98912181  | 6.38E-16    | ** |
| siR_366644 | 29.9907 | 0.01   | -11.55029948 | 3.44E-246   | ** |
| siR_36666  | 0.01    | 1.0442 | 6.70625425   | 1.77E-09    | ** |
| siR_366664 | 1.8434  | 0.01   | -7.52622535  | 8.37E-16    | ** |
| siR_366667 | 1.1344  | 0.01   | -6.82578563  | 5.32E-10    | ** |
| siR_366691 | 2.1624  | 0.01   | -7.75648961  | 2.05E-18    | ** |
| siR_366730 | 10.7768 | 0.01   | -10.07371319 | 6.35E-89    | ** |
| siR_36680  | 1.2407  | 0.8951 | -0.47103354  | 0.220381215 |    |
| siR_366846 | 8.9334  | 0.01   | -9.80306559  | 7.78E-74    | ** |
| siR_366851 | 1.7016  | 0.01   | -7.41074813  | 1.21E-14    | ** |
| siR_366856 | 4.573   | 0.01   | -8.83699711  | 3.81E-38    | ** |
| siR_367034 | 4.254   | 0.01   | -8.73267624  | 1.56E-35    | ** |
| siR_367037 | 1.0989  | 0.01   | -6.7799163   | 1.04E-09    | ** |
| siR_367039 | 44.7024 | 0.01   | -12.1261368  | 0           | ** |
| siR_367040 | 1.737   | 0.01   | -7.44045394  | 6.21E-15    | ** |
| siR_36709  | 1.5598  | 1.7901 | 0.19867913   | 0.509512756 |    |
| siR_36711  | 1.028   | 1.2307 | 0.25963886   | 0.48054543  |    |
| siR_36721  | 1.8788  | 0.3729 | -2.3329508   | 6.03E-08    | ** |

|            |         |        |              |             |    |
|------------|---------|--------|--------------|-------------|----|
| siR_36722  | 1.1698  | 0.3729 | -1.64940119  | 0.000716423 | ** |
| siR_367271 | 1.0989  | 0.01   | -6.7799163   | 1.04E-09    | ** |
| siR_367277 | 1.1698  | 0.01   | -6.87011809  | 2.73E-10    | ** |
| siR_36737  | 0.01    | 1.0815 | 6.75688986   | 8.62E-10    | ** |
| siR_367469 | 27.4383 | 0.01   | -11.42197525 | 2.68E-225   | ** |
| siR_367491 | 2.9069  | 0.01   | -8.18333764  | 1.65E-24    | ** |
| siR_367709 | 2.3042  | 0.01   | -7.84812212  | 1.41E-19    | ** |
| siR_36772  | 3.6513  | 2.536  | -0.52585546  | 0.019022748 |    |
| siR_367740 | 1.2053  | 0.01   | -6.91324847  | 1.40E-10    | ** |
| siR_367747 | 3.5804  | 0.01   | -8.48397698  | 5.07E-30    | ** |
| siR_367768 | 1.028   | 0.01   | -6.68369645  | 3.95E-09    | ** |
| siR_367772 | 1.2053  | 0.01   | -6.91324847  | 1.40E-10    | ** |
| siR_367827 | 5.9556  | 0.01   | -9.21810309  | 1.84E-49    | ** |
| siR_36784  | 3.4741  | 1.3053 | -1.41225786  | 1.44E-07    | ** |
| siR_367864 | 13.7546 | 0.01   | -10.42569848 | 2.69E-113   | ** |
| siR_367865 | 2.9069  | 0.01   | -8.18333764  | 1.65E-24    | ** |
| siR_367898 | 2.0561  | 0.01   | -7.68376661  | 1.52E-17    | ** |
| siR_368    | 13.1874 | 4.7736 | -1.46601057  | 3.67E-26    | ** |
| siR_368061 | 2.2333  | 0.01   | -7.80303324  | 5.38E-19    | ** |
| siR_368066 | 1.4889  | 0.01   | -7.21810305  | 6.67E-13    | ** |
| siR_368080 | 1.1344  | 0.01   | -6.82578563  | 5.32E-10    | ** |
| siR_368081 | 1.8079  | 0.01   | -7.49817107  | 1.63E-15    | ** |
| siR_3681   | 2.0915  | 1.3426 | -0.63950845  | 0.034937772 |    |
| siR_368112 | 1.8788  | 0.01   | -7.55366769  | 4.29E-16    | ** |
| siR_368123 | 70.2264 | 0.01   | -12.77779768 | 0           | ** |
| siR_368144 | 5.1402  | 0.01   | -9.00568068  | 8.67E-43    | ** |
| siR_368189 | 1.6661  | 0.01   | -7.38033118  | 2.36E-14    | ** |
| siR_368209 | 1.3825  | 0.01   | -7.11113566  | 4.95E-12    | ** |
| siR_368227 | 5.6365  | 0.01   | -9.13865581  | 7.51E-47    | ** |
| siR_368278 | 1.4889  | 0.01   | -7.21810305  | 6.67E-13    | ** |
| siR_368328 | 3.2614  | 0.01   | -8.34934759  | 2.07E-27    | ** |
| siR_368339 | 1.5598  | 0.01   | -7.28521726  | 1.75E-13    | ** |
| siR_368430 | 14.4636 | 0.01   | -10.49821097 | 4.23E-119   | ** |
| siR_368440 | 13.2937 | 0.01   | -10.37652703 | 1.59E-109   | ** |
| siR_368500 | 1.8079  | 0.01   | -7.49817107  | 1.63E-15    | ** |
| siR_368591 | 1.1698  | 0.01   | -6.87011809  | 2.73E-10    | ** |
| siR_36860  | 3.9704  | 1.1188 | -1.8273322   | 1.26E-11    | ** |
| siR_368604 | 1.5243  | 0.01   | -7.25200305  | 3.42E-13    | ** |
| siR_368614 | 2.3751  | 0.01   | -7.89184446  | 3.72E-20    | ** |
| siR_368626 | 1.0989  | 0.01   | -6.7799163   | 1.04E-09    | ** |
| siR_368695 | 1.5598  | 0.01   | -7.28521726  | 1.75E-13    | ** |
| siR_368727 | 1.737   | 0.01   | -7.44045394  | 6.21E-15    | ** |
| siR_368734 | 2.5169  | 0.01   | -7.97550407  | 2.57E-21    | ** |
| siR_368736 | 4.573   | 0.01   | -8.83699711  | 3.81E-38    | ** |
| siR_368746 | 1.2053  | 0.01   | -6.91324847  | 1.40E-10    | ** |
| siR_368748 | 13.9318 | 0.01   | -10.44416603 | 9.52E-115   | ** |
| siR_368762 | 2.9423  | 0.01   | -8.20080054  | 8.47E-25    | ** |

|            |          |         |               |              |    |
|------------|----------|---------|---------------|--------------|----|
| siR_368779 | 1. 5598  | 0. 01   | -7. 28521726  | 1. 75E-13    | ** |
| siR_368787 | 1. 6661  | 0. 01   | -7. 38033118  | 2. 36E-14    | ** |
| siR_368823 | 1. 2053  | 0. 01   | -6. 91324847  | 1. 40E-10    | ** |
| siR_36883  | 0. 01    | 4. 3261 | 8. 7569232    | 5. 97E-37    | ** |
| siR_36884  | 0. 01    | 3. 804  | 8. 57137344   | 1. 40E-32    | ** |
| siR_368864 | 1. 2762  | 0. 01   | -6. 99571063  | 3. 67E-11    | ** |
| siR_368926 | 3. 155   | 0. 01   | -8. 3014962   | 1. 54E-26    | ** |
| siR_368957 | 2. 836   | 0. 01   | -8. 14771372  | 6. 28E-24    | ** |
| siR_368975 | 19. 2139 | 0. 01   | -10. 90793479 | 5. 56E-158   | ** |
| siR_368976 | 5. 4947  | 0. 01   | -9. 10189688  | 1. 09E-45    | ** |
| siR_368977 | 1. 1698  | 0. 01   | -6. 87011809  | 2. 73E-10    | ** |
| siR_368985 | 1. 028   | 0. 01   | -6. 68369645  | 3. 95E-09    | ** |
| siR_368993 | 1. 7725  | 0. 01   | -7. 46964183  | 3. 18E-15    | ** |
| siR_368994 | 1. 2762  | 0. 01   | -6. 99571063  | 3. 67E-11    | ** |
| siR_369027 | 8. 7207  | 0. 01   | -9. 76830018  | 4. 28E-72    | ** |
| siR_369028 | 2. 5524  | 0. 01   | -7. 99571063  | 1. 32E-21    | ** |
| siR_369038 | 1. 418   | 0. 01   | -7. 14771372  | 2. 54E-12    | ** |
| siR_369039 | 1. 3471  | 0. 01   | -7. 07371314  | 9. 66E-12    | ** |
| siR_369040 | 1. 3116  | 0. 01   | -7. 035184    | 1. 88E-11    | ** |
| siR_369131 | 3. 7577  | 0. 01   | -8. 5537061   | 1. 79E-31    | ** |
| siR_36921  | 2. 2688  | 0. 5594 | -2. 01997728  | 4. 96E-08    | ** |
| siR_36922  | 4. 573   | 1. 529  | -1. 58055251  | 5. 13E-11    | ** |
| siR_369243 | 1. 2762  | 0. 01   | -6. 99571063  | 3. 67E-11    | ** |
| siR_369245 | 1. 2053  | 0. 01   | -6. 91324847  | 1. 40E-10    | ** |
| siR_369256 | 25. 2758 | 0. 01   | -11. 30354086 | 1. 34E-207   | ** |
| siR_369311 | 1. 4534  | 0. 01   | -7. 18328801  | 1. 30E-12    | ** |
| siR_369338 | 15. 1726 | 0. 01   | -10. 56725266 | 6. 65E-125   | ** |
| siR_369345 | 2. 8005  | 0. 01   | -8. 12954063  | 1. 23E-23    | ** |
| siR_36938  | 3. 2614  | 1. 4545 | -1. 1649681   | 1. 14E-05    | ** |
| siR_369421 | 10. 954  | 0. 01   | -10. 09724211 | 2. 25E-90    | ** |
| siR_369437 | 3. 8995  | 0. 01   | -8. 60714536  | 1. 24E-32    | ** |
| siR_369439 | 1. 3471  | 0. 01   | -7. 07371314  | 9. 66E-12    | ** |
| siR_36944  | 1. 4534  | 0. 5594 | -1. 37747965  | 0. 000918153 | ** |
| siR_369460 | 1. 3825  | 0. 01   | -7. 11113566  | 4. 95E-12    | ** |
| siR_369522 | 1. 2053  | 0. 01   | -6. 91324847  | 1. 40E-10    | ** |
| siR_36955  | 5. 0339  | 4. 4753 | -0. 16969216  | 0. 344292488 |    |
| siR_369555 | 4. 0413  | 0. 01   | -8. 65867564  | 8. 57E-34    | ** |
| siR_36957  | 10. 7059 | 8. 9505 | -0. 2583659   | 0. 038179817 |    |
| siR_369581 | 2. 7296  | 0. 01   | -8. 09254576  | 4. 66E-23    | ** |
| siR_369591 | 1. 028   | 0. 01   | -6. 68369645  | 3. 95E-09    | ** |
| siR_369595 | 3. 4741  | 0. 01   | -8. 44049549  | 3. 76E-29    | ** |
| siR_36960  | 1. 7725  | 1. 0815 | -0. 71275196  | 0. 032912649 |    |
| siR_369603 | 2. 0206  | 0. 01   | -7. 65863995  | 2. 96E-17    | ** |
| siR_369660 | 1. 2762  | 0. 01   | -6. 99571063  | 3. 67E-11    | ** |
| siR_3697   | 0. 01    | 1. 268  | 6. 98641094   | 2. 37E-11    | ** |
| siR_369748 | 5. 2466  | 0. 01   | -9. 03523897  | 1. 17E-43    | ** |
| siR_369754 | 6. 0619  | 0. 01   | -9. 24362624  | 2. 48E-50    | ** |

|            |          |         |              |             |    |
|------------|----------|---------|--------------|-------------|----|
| siR_369756 | 3.0841   | 0.01    | -8.26870574  | 5.85E-26    | ** |
| siR_369790 | 1.4889   | 0.01    | -7.21810305  | 6.67E-13    | ** |
| siR_36980  | 1.5243   | 1.0069  | -0.59822646  | 0.09076544  |    |
| siR_36981  | 7.7281   | 4.1769  | -0.88768116  | 5.98E-08    |    |
| siR_369868 | 2.2333   | 0.01    | -7.80303324  | 5.38E-19    | ** |
| siR_36987  | 10.8477  | 2.9462  | -1.88046191  | 2.27E-30    | ** |
| siR_369870 | 5.2466   | 0.01    | -9.03523897  | 1.17E-43    | ** |
| siR_369873 | 1.028    | 0.01    | -6.68369645  | 3.95E-09    | ** |
| siR_36988  | 3.2614   | 0.9696  | -1.75002979  | 2.65E-09    | ** |
| siR_36992  | 4.6085   | 0.6713  | -2.7792677   | 3.84E-21    | ** |
| siR_369970 | 17.6541  | 0.01    | -10.78578745 | 3.25E-145   | ** |
| siR_36999  | 3.9704   | 1.268   | -1.64672961  | 3.01E-10    | ** |
| siR_370064 | 21.8017  | 0.01    | -11.09022501 | 3.66E-179   | ** |
| siR_370072 | 4.4312   | 0.01    | -8.79155366  | 5.51E-37    | ** |
| siR_37015  | 8.7207   | 3.4683  | -1.33021525  | 1.37E-15    | ** |
| siR_37016  | 2.3042   | 1.4172  | -0.70122257  | 0.016257774 |    |
| siR_370187 | 1.1344   | 0.01    | -6.82578563  | 5.32E-10    | ** |
| siR_370218 | 1.6661   | 0.01    | -7.38033118  | 2.36E-14    | ** |
| siR_370237 | 3.3323   | 0.01    | -8.38037447  | 5.44E-28    | ** |
| siR_370242 | 1.5243   | 0.01    | -7.25200305  | 3.42E-13    | ** |
| siR_37034  | 1.3471   | 0.4475  | -1.58989736  | 0.000394142 | ** |
| siR_370358 | 5.3175   | 0.01    | -9.0546043   | 3.07E-44    | ** |
| siR_370376 | 2.9069   | 0.01    | -8.18333764  | 1.65E-24    | ** |
| siR_370380 | 1.0989   | 0.01    | -6.7799163   | 1.04E-09    | ** |
| siR_37041  | 1.8434   | 2.536   | 0.46018559   | 0.082779603 |    |
| siR_370410 | 6.8418   | 0.01    | -9.41823209  | 1.02E-56    | ** |
| siR_370426 | 1.3116   | 0.01    | -7.035184    | 1.88E-11    | ** |
| siR_370427 | 1.5243   | 0.01    | -7.25200305  | 3.42E-13    | ** |
| siR_370466 | 2.8005   | 0.01    | -8.12954063  | 1.23E-23    | ** |
| siR_37049  | 0.01     | 1.3799  | 7.10841991   | 2.74E-12    | ** |
| siR_370698 | 3.8995   | 0.01    | -8.60714536  | 1.24E-32    | ** |
| siR_3707   | 4.254    | 1.8647  | -1.18987649  | 3.34E-07    | ** |
| siR_371001 | 3.545    | 0.01    | -8.4696418   | 9.89E-30    | ** |
| siR_371059 | 2.9423   | 0.01    | -8.20080054  | 8.47E-25    | ** |
| siR_371100 | 7.2672   | 0.01    | -9.5052558   | 3.38E-60    | ** |
| siR_371106 | 2.1979   | 0.01    | -7.77998195  | 1.05E-18    | ** |
| siR_371113 | 11.9466  | 0.01    | -10.22238444 | 1.69E-98    | ** |
| siR_371117 | 2.5524   | 0.01    | -7.99571063  | 1.32E-21    | ** |
| siR_37112  | 2.9069   | 0.4102  | -2.82508205  | 4.86E-14    | ** |
| siR_37113  | 6.3101   | 1.7901  | -1.81762269  | 1.54E-17    | ** |
| siR_37114  | 117.0203 | 13.1274 | -3.15610571  | 0           | ** |
| siR_37115  | 1.9143   | 0.3356  | -2.51200232  | 1.12E-08    | ** |
| siR_37117  | 2.7296   | 0.1492  | -4.19337011  | 4.85E-18    | ** |
| siR_37121  | 7.2672   | 2.6479  | -1.45655097  | 5.83E-15    | ** |
| siR_37122  | 1.2762   | 0.2611  | -2.28918008  | 1.13E-05    | ** |
| siR_37148  | 11.9466  | 2.5733  | -2.21490852  | 9.18E-41    | ** |
| siR_371482 | 10.7413  | 0.01    | -10.06895291 | 1.24E-88    | ** |

|            |          |         |              |             |    |
|------------|----------|---------|--------------|-------------|----|
| siR_371485 | 7.1963   | 0.01    | -9.49111151  | 1.28E-59    | ** |
| siR_37151  | 1.4889   | 0.634   | -1.23169211  | 0.002080356 | ** |
| siR_371549 | 4.963    | 0.01    | -8.95506867  | 2.45E-41    | ** |
| siR_37155  | 1.8079   | 0.4102  | -2.13991548  | 4.70E-07    | ** |
| siR_371575 | 3.3677   | 0.01    | -8.39561983  | 2.79E-28    | ** |
| siR_371599 | 4.7148   | 0.01    | -8.88105279  | 2.63E-39    | ** |
| siR_371608 | 2.7296   | 0.01    | -8.09254576  | 4.66E-23    | ** |
| siR_371649 | 2.4815   | 0.01    | -7.95506863  | 5.01E-21    | ** |
| siR_371657 | 3.1196   | 0.01    | -8.28521723  | 3.00E-26    | ** |
| siR_37167  | 12.2657  | 2.8716  | -2.09470286  | 4.39E-39    | ** |
| siR_371681 | 3.5804   | 0.01    | -8.48397698  | 5.07E-30    | ** |
| siR_371707 | 1.7725   | 0.01    | -7.46964183  | 3.18E-15    | ** |
| siR_371728 | 2.1979   | 0.01    | -7.77998195  | 1.05E-18    | ** |
| siR_37175  | 1.6661   | 0.5967  | -1.48139731  | 0.000174482 | ** |
| siR_371759 | 1.8434   | 0.01    | -7.52622535  | 8.37E-16    | ** |
| siR_371772 | 1.3116   | 0.01    | -7.035184    | 1.88E-11    | ** |
| siR_371774 | 1.2407   | 0.01    | -6.95501051  | 7.17E-11    | ** |
| siR_371775 | 3.5095   | 0.01    | -8.45512172  | 1.93E-29    | ** |
| siR_37181  | 1.3825   | 0.7086  | -0.96423611  | 0.014998473 | ** |
| siR_371840 | 1.028    | 0.01    | -6.68369645  | 3.95E-09    | ** |
| siR_37185  | 1.0989   | 0.4475  | -1.29610052  | 0.006143403 | ** |
| siR_37193  | 1.2762   | 1.1561  | -0.14258825  | 0.691993921 | ** |
| siR_371958 | 3.4386   | 0.01    | -8.42567749  | 7.34E-29    | ** |
| siR_371959 | 1.3825   | 0.01    | -7.11113566  | 4.95E-12    | ** |
| siR_371964 | 4.1122   | 0.01    | -8.68376664  | 2.25E-34    | ** |
| siR_37199  | 0.01     | 3.9531  | 8.62684064   | 7.90E-34    | ** |
| siR_37200  | 17.9731  | 14.6565 | -0.29429864  | 0.002344969 | ** |
| siR_37202  | 120.778  | 44.8645 | -1.42871145  | 4.53E-217   | ** |
| siR_37203  | 4.6794   | 2.6852  | -0.80129401  | 0.000113781 | ** |
| siR_37207  | 16.0943  | 11.1509 | -0.52938967  | 6.67E-07    | ** |
| siR_372164 | 14.3218  | 0.01    | -10.48399702 | 6.12E-118   | ** |
| siR_372175 | 1.0989   | 0.01    | -6.7799163   | 1.04E-09    | ** |
| siR_372183 | 14.499   | 0.01    | -10.50173776 | 2.17E-119   | ** |
| siR_372184 | 3.7577   | 0.01    | -8.5537061   | 1.79E-31    | ** |
| siR_372238 | 2.3397   | 0.01    | -7.87017976  | 7.25E-20    | ** |
| siR_37226  | 1.2407   | 1.1934  | -0.05607663  | 0.877900267 | ** |
| siR_372300 | 3.0841   | 0.01    | -8.26870574  | 5.85E-26    | ** |
| siR_372308 | 31.0187  | 0.01    | -11.59892239 | 1.32E-254   | ** |
| siR_372309 | 1.2053   | 0.01    | -6.91324847  | 1.40E-10    | ** |
| siR_372315 | 308.5564 | 0.01    | -14.91324597 | 0           | ** |
| siR_372324 | 1.8434   | 0.01    | -7.52622535  | 8.37E-16    | ** |
| siR_372379 | 75.8984  | 0.01    | -12.88985357 | 0           | ** |
| siR_372380 | 2.5169   | 0.01    | -7.97550407  | 2.57E-21    | ** |
| siR_37243  | 4.7857   | 0.8951  | -2.41860919  | 5.65E-19    | ** |
| siR_37244  | 3.7222   | 0.8205  | -2.18158034  | 1.80E-13    | ** |
| siR_37246  | 19.2848  | 2.2003  | -3.13169204  | 2.92E-94    | ** |
| siR_372467 | 1.0989   | 0.01    | -6.7799163   | 1.04E-09    | ** |

|            |         |         |              |             |    |
|------------|---------|---------|--------------|-------------|----|
| siR_37247  | 8.827   | 1.0442  | -3.07952513  | 2.58E-43    | ** |
| siR_372538 | 2.9423  | 0.01    | -8.20080054  | 8.47E-25    | ** |
| siR_372545 | 2.9423  | 0.01    | -8.20080054  | 8.47E-25    | ** |
| siR_372547 | 1.5598  | 0.01    | -7.28521726  | 1.75E-13    | ** |
| siR_372553 | 21.1282 | 0.01    | -11.0449541  | 1.19E-173   | ** |
| siR_37257  | 1.7016  | 1.529   | -0.15430353  | 0.619525613 |    |
| siR_372575 | 12.8683 | 0.01    | -10.32960581 | 4.82E-106   | ** |
| siR_37258  | 1.9852  | 1.2307  | -0.68980523  | 0.028100039 |    |
| siR_372632 | 1.7725  | 0.01    | -7.46964183  | 3.18E-15    | ** |
| siR_372639 | 4.4312  | 0.01    | -8.79155366  | 5.51E-37    | ** |
| siR_372661 | 1.6661  | 0.01    | -7.38033118  | 2.36E-14    | ** |
| siR_372716 | 7.6926  | 0.01    | -9.58732748  | 1.11E-63    | ** |
| siR_372730 | 3.6513  | 0.01    | -8.51226639  | 1.33E-30    | ** |
| siR_372754 | 3.6513  | 0.01    | -8.51226639  | 1.33E-30    | ** |
| siR_372772 | 3.0487  | 0.01    | -8.25205038  | 1.14E-25    | ** |
| siR_372788 | 1.6307  | 0.01    | -7.34934759  | 4.61E-14    | ** |
| siR_37284  | 0.01    | 1.7155  | 7.42248532   | 4.25E-15    | ** |
| siR_372871 | 1.6307  | 0.01    | -7.34934759  | 4.61E-14    | ** |
| siR_372976 | 1.4889  | 0.01    | -7.21810305  | 6.67E-13    | ** |
| siR_373006 | 1.0989  | 0.01    | -6.7799163   | 1.04E-09    | ** |
| siR_373038 | 22.2626 | 0.01    | -11.12040648 | 6.18E-183   | ** |
| siR_37304  | 3.4741  | 1.4172  | -1.29359591  | 8.70E-07    | ** |
| siR_373040 | 5.0693  | 0.01    | -8.98564277  | 3.30E-42    | ** |
| siR_373069 | 2.5878  | 0.01    | -8.0155823   | 6.75E-22    | ** |
| siR_373115 | 3.2259  | 0.01    | -8.33355791  | 4.04E-27    | ** |
| siR_373120 | 2.2688  | 0.01    | -7.82578561  | 2.76E-19    | ** |
| siR_37315  | 1.5598  | 1.0815  | -0.52832739  | 0.126073008 |    |
| siR_373225 | 1.5243  | 0.01    | -7.25200305  | 3.42E-13    | ** |
| siR_37325  | 0.01    | 3.7294  | 8.54279973   | 5.90E-32    | ** |
| siR_37332  | 0.01    | 1.1934  | 6.89893387   | 9.98E-11    | ** |
| siR_37338  | 12.9747 | 9.5099  | -0.44819911  | 0.000127396 |    |
| siR_373452 | 3.2259  | 0.01    | -8.33355791  | 4.04E-27    | ** |
| siR_373469 | 1.3116  | 0.01    | -7.035184    | 1.88E-11    | ** |
| siR_37347  | 1.1344  | 0.8205  | -0.4673542   | 0.245331337 |    |
| siR_373471 | 1.7016  | 0.01    | -7.41074813  | 1.21E-14    | ** |
| siR_373473 | 2.8714  | 0.01    | -8.16561052  | 3.22E-24    | ** |
| siR_37350  | 8.2244  | 1.5663  | -2.39254987  | 3.49E-31    | ** |
| siR_373515 | 5.4947  | 0.01    | -9.10189688  | 1.09E-45    | ** |
| siR_373549 | 4.7503  | 0.01    | -8.89187482  | 1.35E-39    | ** |
| siR_373550 | 1.418   | 0.01    | -7.14771372  | 2.54E-12    | ** |
| siR_373555 | 4.573   | 0.01    | -8.83699711  | 3.81E-38    | ** |
| siR_373567 | 6.2392  | 0.01    | -9.28521723  | 8.77E-52    | ** |
| siR_373578 | 32.0822 | 0.01    | -11.64755746 | 2.61E-263   | ** |
| siR_37362  | 1.0635  | 0.5967  | -0.83374235  | 0.060029399 |    |
| siR_373632 | 93.517  | 0.01    | -13.19101333 | 0           | ** |
| siR_37365  | 7.1609  | 17.9011 | 1.32183542   | 2.46E-30    | ** |
| siR_373693 | 7.9053  | 0.01    | -9.62667644  | 2.02E-65    | ** |

|            |         |         |              |             |    |
|------------|---------|---------|--------------|-------------|----|
| siR_373721 | 1.4534  | 0.01    | -7.18328801  | 1.30E-12    | ** |
| siR_373724 | 3.9704  | 0.01    | -8.63314056  | 3.26E-33    | ** |
| siR_373793 | 1.9143  | 0.01    | -7.58067313  | 2.20E-16    | ** |
| siR_37382  | 1.028   | 0.9323  | -0.14097409  | 0.726340828 |    |
| siR_373829 | 4.4312  | 0.01    | -8.79155366  | 5.51E-37    | ** |
| siR_373833 | 2.5524  | 0.01    | -7.99571063  | 1.32E-21    | ** |
| siR_373871 | 1.5598  | 0.01    | -7.28521726  | 1.75E-13    | ** |
| siR_373875 | 1.5243  | 0.01    | -7.25200305  | 3.42E-13    | ** |
| siR_373879 | 6.9127  | 0.01    | -9.43310546  | 2.69E-57    | ** |
| siR_373885 | 18.3276 | 0.01    | -10.8398021  | 9.97E-151   | ** |
| siR_373890 | 2.8005  | 0.01    | -8.12954063  | 1.23E-23    | ** |
| siR_37390  | 3.6159  | 0.4848  | -2.89889318  | 1.44E-17    | ** |
| siR_373921 | 2.4106  | 0.01    | -7.91324847  | 1.91E-20    | ** |
| siR_373926 | 2.6233  | 0.01    | -8.035239    | 3.46E-22    | ** |
| siR_373969 | 5.8847  | 0.01    | -9.20082503  | 6.99E-49    | ** |
| siR_37397  | 1.1344  | 0.634   | -0.83937469  | 0.050540314 |    |
| siR_374006 | 8.7916  | 0.01    | -9.77998192  | 1.13E-72    | ** |
| siR_37404  | 19.7811 | 11.7849 | -0.74718314  | 6.93E-14    |    |
| siR_37406  | 3.4386  | 4.2888  | 0.31875274   | 0.108742521 |    |
| siR_3741   | 0.01    | 1.4172  | 7.14689956   | 1.34E-12    | ** |
| siR_37410  | 0.01    | 1.3426  | 7.06888574   | 5.63E-12    | ** |
| siR_374117 | 1.4889  | 0.01    | -7.21810305  | 6.67E-13    | ** |
| siR_374191 | 1.028   | 0.01    | -6.68369645  | 3.95E-09    | ** |
| siR_37420  | 2.446   | 0.3356  | -2.86560978  | 3.59E-12    | ** |
| siR_374262 | 1.7725  | 0.01    | -7.46964183  | 3.18E-15    | ** |
| siR_37429  | 3.8286  | 2.7225  | -0.49188489  | 0.023822381 |    |
| siR_374302 | 4.6439  | 0.01    | -8.85919308  | 1.00E-38    | ** |
| siR_374309 | 2.1979  | 0.01    | -7.77998195  | 1.05E-18    | ** |
| siR_374341 | 1.4534  | 0.01    | -7.18328801  | 1.30E-12    | ** |
| siR_37437  | 2.9423  | 0.4102  | -2.84254496  | 2.81E-14    | ** |
| siR_374374 | 2.836   | 0.01    | -8.14771372  | 6.28E-24    | ** |
| siR_37439  | 1.4889  | 0.3729  | -1.99738616  | 1.28E-05    | ** |
| siR_374412 | 12.9392 | 0.01    | -10.33753272 | 1.27E-106   | ** |
| siR_374414 | 3.1196  | 0.01    | -8.28521723  | 3.00E-26    | ** |
| siR_37442  | 0.01    | 2.6106  | 8.02823761   | 1.37E-22    | ** |
| siR_374432 | 2.5878  | 0.01    | -8.0155823   | 6.75E-22    | ** |
| siR_374439 | 2.5169  | 0.01    | -7.97550407  | 2.57E-21    | ** |
| siR_374441 | 7.3027  | 0.01    | -9.5122862   | 1.73E-60    | ** |
| siR_37448  | 4.4667  | 3.0208  | -0.56427869  | 0.005660383 |    |
| siR_374485 | 2.2333  | 0.01    | -7.80303324  | 5.38E-19    | ** |
| siR_374492 | 1.4534  | 0.01    | -7.18328801  | 1.30E-12    | ** |
| siR_374497 | 1.2053  | 0.01    | -6.91324847  | 1.40E-10    | ** |
| siR_374517 | 3.8286  | 0.01    | -8.58067313  | 4.72E-32    | ** |
| siR_374536 | 1.4534  | 0.01    | -7.18328801  | 1.30E-12    | ** |
| siR_374548 | 11.3085 | 0.01    | -10.14319183 | 2.82E-93    | ** |
| siR_374563 | 3.8995  | 0.01    | -8.60714536  | 1.24E-32    | ** |
| siR_374564 | 1.737   | 0.01    | -7.44045394  | 6.21E-15    | ** |

|            |         |        |              |             |    |
|------------|---------|--------|--------------|-------------|----|
| siR_374607 | 1.6661  | 0.01   | -7.38033118  | 2.36E-14    | ** |
| siR_37464  | 0.01    | 3.7667 | 8.55715732   | 2.87E-32    | ** |
| siR_37469  | 0.01    | 2.4241 | 7.9213054    | 4.98E-21    | ** |
| siR_374747 | 1.6307  | 0.01   | -7.34934759  | 4.61E-14    | ** |
| siR_374751 | 7.5863  | 0.01   | -9.56725266  | 8.26E-63    | ** |
| siR_374756 | 1.4534  | 0.01   | -7.18328801  | 1.30E-12    | ** |
| siR_374763 | 1.0989  | 0.01   | -6.7799163   | 1.04E-09    | ** |
| siR_37479  | 5.2466  | 0.6713 | -2.96635326  | 1.98E-25    | ** |
| siR_374831 | 5.2466  | 0.01   | -9.03523897  | 1.17E-43    | ** |
| siR_37494  | 1.3116  | 0.7086 | -0.88828444  | 0.027066419 |    |
| siR_375024 | 1.2053  | 0.01   | -6.91324847  | 1.40E-10    | ** |
| siR_37503  | 27.97   | 9.8829 | -1.50087391  | 1.71E-55    | ** |
| siR_37504  | 6.5582  | 2.6852 | -1.28827035  | 1.44E-11    | ** |
| siR_375046 | 1.5598  | 0.01   | -7.28521726  | 1.75E-13    | ** |
| siR_375212 | 1.9852  | 0.01   | -7.63314056  | 5.78E-17    | ** |
| siR_375359 | 7.4799  | 0.01   | -9.54687514  | 6.13E-62    | ** |
| siR_375415 | 1.028   | 0.01   | -6.68369645  | 3.95E-09    | ** |
| siR_375434 | 1.1698  | 0.01   | -6.87011809  | 2.73E-10    | ** |
| siR_375459 | 1.8434  | 0.01   | -7.52622535  | 8.37E-16    | ** |
| siR_375460 | 6.0974  | 0.01   | -9.25205038  | 1.27E-50    | ** |
| siR_375478 | 1.2053  | 0.01   | -6.91324847  | 1.40E-10    | ** |
| siR_375500 | 16.4133 | 0.01   | -10.68064962 | 4.65E-135   | ** |
| siR_375583 | 32.0468 | 0.01   | -11.64596476 | 5.10E-263   | ** |
| siR_375619 | 5.1757  | 0.01   | -9.01561019  | 4.44E-43    | ** |
| siR_375697 | 4.254   | 0.01   | -8.73267624  | 1.56E-35    | ** |
| siR_37570  | 5.7783  | 5.5195 | -0.06610753  | 0.688339904 |    |
| siR_37579  | 1.1344  | 0.8205 | -0.4673542   | 0.245331337 |    |
| siR_375882 | 2.0915  | 0.01   | -7.70839418  | 7.79E-18    | ** |
| siR_375889 | 1.2053  | 0.01   | -6.91324847  | 1.40E-10    | ** |
| siR_375895 | 7.799   | 0.01   | -9.60714531  | 1.50E-64    | ** |
| siR_37591  | 1.9497  | 2.0139 | 0.04673989   | 0.864051308 |    |
| siR_375943 | 15.3498 | 0.01   | -10.58400411 | 2.36E-126   | ** |
| siR_375946 | 1.0989  | 0.01   | -6.7799163   | 1.04E-09    | ** |
| siR_375991 | 1.418   | 0.01   | -7.14771372  | 2.54E-12    | ** |
| siR_376049 | 2.0915  | 0.01   | -7.70839418  | 7.79E-18    | ** |
| siR_376078 | 12.9038 | 0.01   | -10.33358029 | 2.47E-106   | ** |
| siR_376094 | 4.2185  | 0.01   | -8.72058632  | 3.03E-35    | ** |
| siR_376105 | 1.2762  | 0.01   | -6.99571063  | 3.67E-11    | ** |
| siR_376138 | 1.028   | 0.01   | -6.68369645  | 3.95E-09    | ** |
| siR_376266 | 3.6868  | 0.01   | -8.52622535  | 6.83E-31    | ** |
| siR_376287 | 2.4106  | 0.01   | -7.91324847  | 1.91E-20    | ** |
| siR_376321 | 1.3471  | 0.01   | -7.07371314  | 9.66E-12    | ** |
| siR_376353 | 1.1698  | 0.01   | -6.87011809  | 2.73E-10    | ** |
| siR_376513 | 1.4534  | 0.01   | -7.18328801  | 1.30E-12    | ** |
| siR_37652  | 1.4889  | 0.7459 | -0.99719273  | 0.009388402 |    |
| siR_376563 | 2.5169  | 0.01   | -7.97550407  | 2.57E-21    | ** |
| siR_376570 | 16.5906 | 0.01   | -10.69615024 | 1.65E-136   | ** |



|            |         |         |              |             |    |
|------------|---------|---------|--------------|-------------|----|
| siR_376574 | 2.4106  | 0.01    | -7.91324847  | 1.91E-20    | ** |
| siR_376597 | 1.1344  | 0.01    | -6.82578563  | 5.32E-10    | ** |
| siR_376677 | 1.6661  | 0.01    | -7.38033118  | 2.36E-14    | ** |
| siR_376688 | 8.6498  | 0.01    | -9.75652296  | 1.63E-71    | ** |
| siR_376689 | 2.0915  | 0.01    | -7.70839418  | 7.79E-18    | ** |
| siR_37673  | 1.0989  | 0.2984  | -1.88074067  | 0.000335467 | ** |
| siR_376733 | 1.2053  | 0.01    | -6.91324847  | 1.40E-10    | ** |
| siR_376738 | 1.1698  | 0.01    | -6.87011809  | 2.73E-10    | ** |
| siR_37674  | 1.2407  | 0.7832  | -0.66370165  | 0.09494326  |    |
| siR_376740 | 1.8434  | 0.01    | -7.52622535  | 8.37E-16    | ** |
| siR_376743 | 4.254   | 0.01    | -8.73267624  | 1.56E-35    | ** |
| siR_376753 | 1.6307  | 0.01    | -7.34934759  | 4.61E-14    | ** |
| siR_376772 | 3.5095  | 0.01    | -8.45512172  | 1.93E-29    | ** |
| siR_376779 | 39.7394 | 0.01    | -11.95635455 | 0           | ** |
| siR_376808 | 2.0915  | 0.01    | -7.70839418  | 7.79E-18    | ** |
| siR_376812 | 2.8005  | 0.01    | -8.12954063  | 1.23E-23    | ** |
| siR_376816 | 12.053  | 0.01    | -10.2351765  | 2.27E-99    | ** |
| siR_376911 | 1.418   | 0.01    | -7.14771372  | 2.54E-12    | ** |
| siR_376977 | 12.9392 | 0.01    | -10.33753272 | 1.27E-106   | ** |
| siR_376990 | 1.9497  | 0.01    | -7.60710834  | 1.13E-16    | ** |
| siR_376999 | 1.9497  | 0.01    | -7.60710834  | 1.13E-16    | ** |
| siR_377002 | 1.4889  | 0.01    | -7.21810305  | 6.67E-13    | ** |
| siR_377095 | 1.9497  | 0.01    | -7.60710834  | 1.13E-16    | ** |
| siR_377098 | 1.0635  | 0.01    | -6.73267622  | 2.02E-09    | ** |
| siR_3771   | 7.9762  | 1.8274  | -2.12590912  | 2.02E-26    | ** |
| siR_37715  | 13.0101 | 6.9367  | -0.90731065  | 7.56E-13    |    |
| siR_377187 | 1.4534  | 0.01    | -7.18328801  | 1.30E-12    | ** |
| siR_377304 | 2.8714  | 0.01    | -8.16561052  | 3.22E-24    | ** |
| siR_377323 | 1.028   | 0.01    | -6.68369645  | 3.95E-09    | ** |
| siR_377384 | 2.5524  | 0.01    | -7.99571063  | 1.32E-21    | ** |
| siR_377394 | 2.3751  | 0.01    | -7.89184446  | 3.72E-20    | ** |
| siR_377398 | 7.2672  | 0.01    | -9.5052558   | 3.38E-60    | ** |
| siR_37745  | 2.5524  | 1.0442  | -1.28945638  | 2.69E-05    | ** |
| siR_377460 | 3.1196  | 0.01    | -8.28521723  | 3.00E-26    | ** |
| siR_377463 | 6.7     | 0.01    | -9.3880173   | 1.48E-55    | ** |
| siR_377482 | 12.0175 | 0.01    | -10.23092113 | 4.44E-99    | ** |
| siR_37751  | 0.01    | 3.0581  | 8.25649177   | 2.46E-26    | ** |
| siR_377540 | 1.2407  | 0.01    | -6.95501051  | 7.17E-11    | ** |
| siR_377586 | 6.6291  | 0.01    | -9.37266921  | 5.64E-55    | ** |
| siR_377669 | 2.127   | 0.01    | -7.73267621  | 3.99E-18    | ** |
| siR_377708 | 1.8788  | 0.01    | -7.55366769  | 4.29E-16    | ** |
| siR_377721 | 2.0915  | 0.01    | -7.70839418  | 7.79E-18    | ** |
| siR_37773  | 26.2684 | 17.5281 | -0.58365871  | 3.97E-12    |    |
| siR_377739 | 1.418   | 0.01    | -7.14771372  | 2.54E-12    | ** |
| siR_377742 | 4.3603  | 0.01    | -8.76828358  | 2.10E-36    | ** |
| siR_377745 | 1.0989  | 0.01    | -6.7799163   | 1.04E-09    | ** |
| siR_377747 | 24.1769 | 0.01    | -11.23941341 | 1.33E-198   | ** |

|            |          |        |              |             |    |
|------------|----------|--------|--------------|-------------|----|
| siR_37785  | 12.4075  | 6.0789 | -1.02933026  | 7.58E-15    | ** |
| siR_37786  | 22.1917  | 7.7198 | -1.52338481  | 2.51E-45    | ** |
| siR_377869 | 3.6513   | 0.01   | -8.51226639  | 1.33E-30    | ** |
| siR_377871 | 1.1698   | 0.01   | -6.87011809  | 2.73E-10    | ** |
| siR_378082 | 1.3471   | 0.01   | -7.07371314  | 9.66E-12    | ** |
| siR_378140 | 2.3751   | 0.01   | -7.89184446  | 3.72E-20    | ** |
| siR_378198 | 53.104   | 0.01   | -12.37460506 | 0           | ** |
| siR_3782   | 0.01     | 1.1561 | 6.85312238   | 2.05E-10    | ** |
| siR_378243 | 1.6661   | 0.01   | -7.38033118  | 2.36E-14    | ** |
| siR_378287 | 1.418    | 0.01   | -7.14771372  | 2.54E-12    | ** |
| siR_378312 | 1.4889   | 0.01   | -7.21810305  | 6.67E-13    | ** |
| siR_378315 | 2.5169   | 0.01   | -7.97550407  | 2.57E-21    | ** |
| siR_37832  | 2.2333   | 1.1188 | -0.9972249   | 0.001405726 |    |
| siR_378354 | 1.9852   | 0.01   | -7.63314056  | 5.78E-17    | ** |
| siR_3784   | 0.0354   | 1.0442 | 4.88250489   | 2.81E-08    | ** |
| siR_378432 | 4.3249   | 0.01   | -8.75652296  | 4.09E-36    | ** |
| siR_3785   | 0.01     | 1.2307 | 6.94333532   | 4.86E-11    | ** |
| siR_37853  | 4.6794   | 0.9696 | -2.27086195  | 2.41E-17    | ** |
| siR_378616 | 8.0117   | 0.01   | -9.64596464  | 2.72E-66    | ** |
| siR_378667 | 2.9069   | 0.01   | -8.18333764  | 1.65E-24    | ** |
| siR_37867  | 9.1106   | 3.0208 | -1.5926154   | 9.62E-21    | ** |
| siR_378679 | 1.8788   | 0.01   | -7.55366769  | 4.29E-16    | ** |
| siR_378828 | 1.1698   | 0.01   | -6.87011809  | 2.73E-10    | ** |
| siR_378838 | 423.0952 | 0.01   | -15.3686973  | 0           | ** |
| siR_378839 | 4.6794   | 0.01   | -8.87017976  | 5.13E-39    | ** |
| siR_378847 | 23.8933  | 0.01   | -11.2223903  | 2.78E-196   | ** |
| siR_378848 | 1.3825   | 0.01   | -7.11113566  | 4.95E-12    | ** |
| siR_37886  | 1.4534   | 0.634  | -1.19687707  | 0.002948104 | ** |
| siR_378981 | 1.3825   | 0.01   | -7.11113566  | 4.95E-12    | ** |
| siR_37902  | 0.01     | 4.6617 | 8.86471235   | 9.25E-40    | ** |
| siR_37903  | 27.3674  | 16.111 | -0.76441234  | 2.54E-19    |    |
| siR_379132 | 8.5789   | 7.6825 | -0.15921681  | 0.245065239 |    |
| siR_379171 | 26.9065  | 0.01   | -11.39373905 | 6.03E-221   | ** |
| siR_379176 | 2.5169   | 0.01   | -7.97550407  | 2.57E-21    | ** |
| siR_379184 | 3.6868   | 0.01   | -8.52622535  | 6.83E-31    | ** |
| siR_3792   | 0.01     | 1.4545 | 7.18437949   | 6.51E-13    | ** |
| siR_379302 | 1.3471   | 0.01   | -7.07371314  | 9.66E-12    | ** |
| siR_379339 | 2.9778   | 0.01   | -8.21810305  | 4.34E-25    | ** |
| siR_379375 | 2.4106   | 0.01   | -7.91324847  | 1.91E-20    | ** |
| siR_379379 | 1.0635   | 0.01   | -6.73267622  | 2.02E-09    | ** |
| siR_37938  | 1.6307   | 1.6036 | -0.02417707  | 0.940359108 |    |
| siR_3794   | 1.418    | 0.6713 | -1.07882799  | 0.006897488 | ** |
| siR_379410 | 1.6661   | 0.01   | -7.38033118  | 2.36E-14    | ** |
| siR_379483 | 28.7145  | 0.01   | -11.48756376 | 9.60E-236   | ** |
| siR_379489 | 1.5952   | 0.01   | -7.31759351  | 8.99E-14    | ** |
| siR_379494 | 15.3144  | 0.01   | -10.58067313 | 4.60E-126   | ** |
| siR_37952  | 2.4815   | 1.7528 | -0.50155107  | 0.064659602 |    |

|            |         |        |              |             |    |
|------------|---------|--------|--------------|-------------|----|
| siR_379523 | 3.8995  | 0.01   | -8.60714536  | 1.24E-32    | ** |
| siR_379537 | 41.6182 | 0.01   | -12.02299881 | 0           | ** |
| siR_379606 | 3.155   | 0.01   | -8.3014962   | 1.54E-26    | ** |
| siR_379615 | 3.7222  | 0.01   | -8.54001177  | 3.50E-31    | ** |
| siR_379635 | 7.0545  | 0.01   | -9.46240003  | 1.86E-58    | ** |
| siR_379654 | 1.1344  | 0.01   | -6.82578563  | 5.32E-10    | ** |
| siR_379688 | 1.0989  | 0.01   | -6.7799163   | 1.04E-09    | ** |
| siR_379709 | 4.8921  | 0.01   | -8.93431011  | 9.31E-41    | ** |
| siR_37971  | 5.1048  | 1.2307 | -2.05237531  | 9.84E-17    | ** |
| siR_379757 | 1.7016  | 0.01   | -7.41074813  | 1.21E-14    | ** |
| siR_37983  | 0.01    | 4.3261 | 8.7569232    | 5.97E-37    | ** |
| siR_379834 | 1.2762  | 0.01   | -6.99571063  | 3.67E-11    | ** |
| siR_379849 | 1.2053  | 0.01   | -6.91324847  | 1.40E-10    | ** |
| siR_379850 | 1.028   | 0.01   | -6.68369645  | 3.95E-09    | ** |
| siR_37992  | 1.2407  | 0.9323 | -0.41228814  | 0.278739525 |    |
| siR_379934 | 4.0767  | 0.01   | -8.67125799  | 4.39E-34    | ** |
| siR_379970 | 1.2762  | 0.01   | -6.99571063  | 3.67E-11    | ** |
| siR_379984 | 1.028   | 0.01   | -6.68369645  | 3.95E-09    | ** |
| siR_379999 | 1.028   | 0.01   | -6.68369645  | 3.95E-09    | ** |
| siR_380137 | 4.5021  | 0.01   | -8.81445427  | 1.45E-37    | ** |
| siR_380161 | 24.2832 | 0.01   | -11.24574298 | 1.79E-199   | ** |
| siR_3802   | 1.5243  | 0.3356 | -2.18333225  | 2.95E-06    | ** |
| siR_380212 | 2.1624  | 0.01   | -7.75648961  | 2.05E-18    | ** |
| siR_380251 | 2.7296  | 0.01   | -8.09254576  | 4.66E-23    | ** |
| siR_38036  | 2.3751  | 0.8951 | -1.40786748  | 1.50E-05    | ** |
| siR_380423 | 1.2053  | 0.01   | -6.91324847  | 1.40E-10    | ** |
| siR_380445 | 1.3825  | 0.01   | -7.11113566  | 4.95E-12    | ** |
| siR_380546 | 41.7955 | 0.01   | -12.02913195 | 0           | ** |
| siR_380558 | 2.3751  | 0.01   | -7.89184446  | 3.72E-20    | ** |
| siR_380563 | 5.282   | 0.01   | -9.04494046  | 5.99E-44    | ** |
| siR_38059  | 1.9852  | 0.634  | -1.64672961  | 9.33E-06    | ** |
| siR_380592 | 8.508   | 0.01   | -9.73267618  | 2.36E-70    | ** |
| siR_380637 | 1.8434  | 0.01   | -7.52622535  | 8.37E-16    | ** |
| siR_380642 | 7.0545  | 0.01   | -9.46240003  | 1.86E-58    | ** |
| siR_380651 | 4.7148  | 0.01   | -8.88105279  | 2.63E-39    | ** |
| siR_380659 | 2.2688  | 0.01   | -7.82578561  | 2.76E-19    | ** |
| siR_380663 | 1.4889  | 0.01   | -7.21810305  | 6.67E-13    | ** |
| siR_380666 | 2.9778  | 0.01   | -8.21810305  | 4.34E-25    | ** |
| siR_380699 | 1.4534  | 0.01   | -7.18328801  | 1.30E-12    | ** |
| siR_380737 | 2.0561  | 0.01   | -7.68376661  | 1.52E-17    | ** |
| siR_38074  | 1.6307  | 0.7832 | -1.05803872  | 0.004283913 | ** |
| siR_380796 | 1.5243  | 0.01   | -7.25200305  | 3.42E-13    | ** |
| siR_380824 | 4.0413  | 0.01   | -8.65867564  | 8.57E-34    | ** |
| siR_38084  | 2.3042  | 1.0442 | -1.14186788  | 0.000292341 | ** |
| siR_380922 | 2.0561  | 0.01   | -7.68376661  | 1.52E-17    | ** |
| siR_381105 | 13.3292 | 0.01   | -10.38037443 | 8.15E-110   | ** |
| siR_381106 | 2.127   | 0.01   | -7.73267621  | 3.99E-18    | ** |

|            |         |         |             |             |    |
|------------|---------|---------|-------------|-------------|----|
| siR_38111  | 21.4472 | 6.6756  | -1.68381989 | 2.04E-50    | ** |
| siR_381129 | 1.8788  | 0.01    | -7.55366769 | 4.29E-16    | ** |
| siR_38118  | 1.0635  | 0.1865  | -2.5115725  | 2.49E-05    | ** |
| siR_38124  | 3.1196  | 0.9696  | -1.68589945 | 1.43E-08    | ** |
| siR_381289 | 1.8788  | 0.01    | -7.55366769 | 4.29E-16    | ** |
| siR_38129  | 0.01    | 3.804   | 8.57137344  | 1.40E-32    | ** |
| siR_38131  | 0.01    | 1.529   | 7.2564446   | 1.55E-13    | ** |
| siR_381369 | 2.5524  | 0.01    | -7.99571063 | 1.32E-21    | ** |
| siR_381460 | 1.0635  | 0.01    | -6.73267622 | 2.02E-09    | ** |
| siR_38147  | 2.127   | 1.0069  | -1.07889962 | 0.000892634 | ** |
| siR_381510 | 1.5598  | 0.01    | -7.28521726 | 1.75E-13    | ** |
| siR_381573 | 4.6794  | 0.01    | -8.87017976 | 5.13E-39    | ** |
| siR_381603 | 1.2762  | 0.01    | -6.99571063 | 3.67E-11    | ** |
| siR_381614 | 2.1979  | 0.01    | -7.77998195 | 1.05E-18    | ** |
| siR_381634 | 1.5243  | 0.01    | -7.25200305 | 3.42E-13    | ** |
| siR_381646 | 3.0487  | 0.01    | -8.25205038 | 1.14E-25    | ** |
| siR_381650 | 2.1624  | 0.01    | -7.75648961 | 2.05E-18    | ** |
| siR_381684 | 1.0989  | 0.01    | -6.7799163  | 1.04E-09    | ** |
| siR_381781 | 1.4534  | 0.01    | -7.18328801 | 1.30E-12    | ** |
| siR_381936 | 2.3751  | 0.01    | -7.89184446 | 3.72E-20    | ** |
| siR_381939 | 1.0635  | 0.01    | -6.73267622 | 2.02E-09    | ** |
| siR_381951 | 1.3116  | 0.01    | -7.035184   | 1.88E-11    | ** |
| siR_382038 | 1.7016  | 0.01    | -7.41074813 | 1.21E-14    | ** |
| siR_382133 | 2.2333  | 0.01    | -7.80303324 | 5.38E-19    | ** |
| siR_382153 | 10.635  | 0.01    | -10.0546043 | 9.19E-88    | ** |
| siR_382230 | 1.028   | 0.01    | -6.68369645 | 3.95E-09    | ** |
| siR_38228  | 0.01    | 2.0139  | 7.65384824  | 1.35E-17    | ** |
| siR_382286 | 4.6794  | 0.01    | -8.87017976 | 5.13E-39    | ** |
| siR_3823   | 0.01    | 1.6782  | 7.39077085  | 8.72E-15    | ** |
| siR_38231  | 0.01    | 1.1934  | 6.89893387  | 9.98E-11    | ** |
| siR_382451 | 4.6439  | 0.01    | -8.85919308 | 1.00E-38    | ** |
| siR_382456 | 2.9423  | 0.01    | -8.20080054 | 8.47E-25    | ** |
| siR_382458 | 3.7577  | 0.01    | -8.5537061  | 1.79E-31    | ** |
| siR_38246  | 0.01    | 1.1934  | 6.89893387  | 9.98E-11    | ** |
| siR_382472 | 2.127   | 0.01    | -7.73267621 | 3.99E-18    | ** |
| siR_382477 | 1.6307  | 0.01    | -7.34934759 | 4.61E-14    | ** |
| siR_38249  | 0.01    | 28.8655 | 11.4951305  | 2.30E-242   | ** |
| siR_382493 | 1.1344  | 0.01    | -6.82578563 | 5.32E-10    | ** |
| siR_382586 | 5.1402  | 0.01    | -9.00568068 | 8.67E-43    | ** |
| siR_382600 | 2.5169  | 0.01    | -7.97550407 | 2.57E-21    | ** |
| siR_382602 | 1.2053  | 0.01    | -6.91324847 | 1.40E-10    | ** |
| siR_382610 | 1.3825  | 0.01    | -7.11113566 | 4.95E-12    | ** |
| siR_382620 | 1.8434  | 0.01    | -7.52622535 | 8.37E-16    | ** |
| siR_382699 | 1.9852  | 0.01    | -7.63314056 | 5.78E-17    | ** |
| siR_38270  | 12.3366 | 7.6079  | -0.69737465 | 2.62E-08    | ** |
| siR_382724 | 2.5169  | 0.01    | -7.97550407 | 2.57E-21    | ** |
| siR_382732 | 2.8005  | 0.01    | -8.12954063 | 1.23E-23    | ** |

|            |          |         |               |              |    |
|------------|----------|---------|---------------|--------------|----|
| siR_382741 | 1. 2053  | 0. 01   | -6. 91324847  | 1. 40E-10    | ** |
| siR_382781 | 1. 3116  | 0. 01   | -7. 035184    | 1. 88E-11    | ** |
| siR_382838 | 2. 5878  | 0. 01   | -8. 0155823   | 6. 75E-22    | ** |
| siR_382845 | 1. 3825  | 0. 01   | -7. 11113566  | 4. 95E-12    | ** |
| siR_382875 | 1. 7725  | 0. 01   | -7. 46964183  | 3. 18E-15    | ** |
| siR_382895 | 1. 5952  | 0. 01   | -7. 31759351  | 8. 99E-14    | ** |
| siR_382896 | 1. 5243  | 0. 01   | -7. 25200305  | 3. 42E-13    | ** |
| siR_38293  | 1. 1698  | 0. 0746 | -3. 97094245  | 4. 33E-08    | ** |
| siR_382938 | 4. 1831  | 0. 01   | -8. 70842867  | 5. 92E-35    | ** |
| siR_383128 | 1. 3825  | 0. 01   | -7. 11113566  | 4. 95E-12    | ** |
| siR_38322  | 0. 01    | 1. 0815 | 6. 75688986   | 8. 62E-10    | ** |
| siR_383245 | 5. 8492  | 0. 01   | -9. 19209551  | 1. 36E-48    | ** |
| siR_383269 | 1. 1698  | 0. 01   | -6. 87011809  | 2. 73E-10    | ** |
| siR_383353 | 1. 3825  | 0. 01   | -7. 11113566  | 4. 95E-12    | ** |
| siR_383389 | 10. 245  | 0. 01   | -10. 00070426 | 1. 43E-84    | ** |
| siR_383417 | 10. 6704 | 0. 01   | -10. 05939853 | 4. 71E-88    | ** |
| siR_383432 | 3. 6868  | 0. 01   | -8. 52622535  | 6. 83E-31    | ** |
| siR_383438 | 8. 0826  | 0. 01   | -9. 65867569  | 7. 16E-67    | ** |
| siR_38345  | 5. 7783  | 4. 4753 | -0. 36866071  | 0. 033247729 |    |
| siR_383528 | 22. 9007 | 0. 01   | -11. 1611759  | 3. 70E-188   | ** |
| siR_383621 | 2. 9423  | 0. 01   | -8. 20080054  | 8. 47E-25    | ** |
| siR_383637 | 1. 3471  | 0. 01   | -7. 07371314  | 9. 66E-12    | ** |
| siR_38371  | 1. 7016  | 1. 0069 | -0. 75697153  | 0. 027686419 |    |
| siR_383767 | 2. 2688  | 0. 01   | -7. 82578561  | 2. 76E-19    | ** |
| siR_383797 | 8. 5434  | 0. 01   | -9. 7386665   | 1. 21E-70    | ** |
| siR_383798 | 4. 4312  | 0. 01   | -8. 79155366  | 5. 51E-37    | ** |
| siR_383805 | 14. 889  | 0. 01   | -10. 5400311  | 1. 39E-122   | ** |
| siR_383806 | 3. 0841  | 0. 01   | -8. 26870574  | 5. 85E-26    | ** |
| siR_383807 | 2. 836   | 0. 01   | -8. 14771372  | 6. 28E-24    | ** |
| siR_383808 | 2. 0915  | 0. 01   | -7. 70839418  | 7. 79E-18    | ** |
| siR_383809 | 1. 1344  | 0. 01   | -6. 82578563  | 5. 32E-10    | ** |
| siR_383810 | 1. 0635  | 0. 01   | -6. 73267622  | 2. 02E-09    | ** |
| siR_383815 | 26. 8356 | 0. 01   | -11. 38993254 | 2. 29E-220   | ** |
| siR_383816 | 2. 7296  | 0. 01   | -8. 09254576  | 4. 66E-23    | ** |
| siR_383817 | 1. 8434  | 0. 01   | -7. 52622535  | 8. 37E-16    | ** |
| siR_383825 | 1. 3116  | 0. 01   | -7. 035184    | 1. 88E-11    | ** |
| siR_383826 | 1. 0989  | 0. 01   | -6. 7799163   | 1. 04E-09    | ** |
| siR_383833 | 4. 7148  | 0. 01   | -8. 88105279  | 2. 63E-39    | ** |
| siR_38401  | 1. 8434  | 0. 634  | -1. 53981441  | 4. 78E-05    | ** |
| siR_384025 | 1. 0989  | 0. 01   | -6. 7799163   | 1. 04E-09    | ** |
| siR_384029 | 2. 4815  | 0. 01   | -7. 95506863  | 5. 01E-21    | ** |
| siR_384030 | 1. 8079  | 0. 01   | -7. 49817107  | 1. 63E-15    | ** |
| siR_384052 | 1. 8079  | 0. 01   | -7. 49817107  | 1. 63E-15    | ** |
| siR_384063 | 13. 2228 | 0. 01   | -10. 36881194 | 6. 05E-109   | ** |
| siR_384070 | 1. 6307  | 0. 01   | -7. 34934759  | 4. 61E-14    | ** |
| siR_384071 | 1. 418   | 0. 01   | -7. 14771372  | 2. 54E-12    | ** |
| siR_384079 | 3. 0487  | 0. 01   | -8. 25205038  | 1. 14E-25    | ** |

|            |          |         |              |             |    |
|------------|----------|---------|--------------|-------------|----|
| siR_384087 | 2.5524   | 0.01    | -7.99571063  | 1.32E-21    | ** |
| siR_384090 | 1.1698   | 0.01    | -6.87011809  | 2.73E-10    | ** |
| siR_38414  | 1.5598   | 0.634   | -1.29880631  | 0.001018403 | ** |
| siR_384165 | 2.0915   | 0.01    | -7.70839418  | 7.79E-18    | ** |
| siR_38419  | 0.01     | 1.0815  | 6.75688986   | 8.62E-10    | ** |
| siR_3842   | 1.418    | 0.5967  | -1.24877985  | 0.002405224 | ** |
| siR_38424  | 0.01     | 2.3868  | 7.89893387   | 1.02E-20    | ** |
| siR_384277 | 19.7811  | 0.01    | -10.94990682 | 1.27E-162   | ** |
| siR_384286 | 1.737    | 0.01    | -7.44045394  | 6.21E-15    | ** |
| siR_38429  | 0.01     | 21.1829 | 11.0486844   | 4.68E-178   | ** |
| siR_38430  | 0.01     | 4.5871  | 8.84143855   | 3.90E-39    | ** |
| siR_38434  | 1.1698   | 0.4102  | -1.5118625   | 0.001486275 | ** |
| siR_384371 | 1.5952   | 0.01    | -7.31759351  | 8.99E-14    | ** |
| siR_384372 | 1.2407   | 0.01    | -6.95501051  | 7.17E-11    | ** |
| siR_384378 | 1.737    | 0.01    | -7.44045394  | 6.21E-15    | ** |
| siR_384420 | 1.9497   | 0.01    | -7.60710834  | 1.13E-16    | ** |
| siR_384650 | 3.7222   | 0.01    | -8.54001177  | 3.50E-31    | ** |
| siR_384772 | 19.9583  | 0.01    | -10.96277306 | 4.48E-164   | ** |
| siR_38478  | 6.4164   | 1.7528  | -1.87210269  | 1.78E-18    | ** |
| siR_38482  | 1.8788   | 0.7086  | -1.40676813  | 0.000123157 | ** |
| siR_38494  | 0.01     | 1.7528  | 7.45351758   | 2.07E-15    | ** |
| siR_385013 | 59.8041  | 0.01    | -12.54602882 | 0           | ** |
| siR_385014 | 1.0989   | 0.01    | -6.7799163   | 1.04E-09    | ** |
| siR_385019 | 117.1266 | 0.01    | -13.51578118 | 0           | ** |
| siR_385023 | 8.1535   | 0.01    | -9.67127563  | 1.88E-67    | ** |
| siR_385044 | 4.573    | 0.01    | -8.83699711  | 3.81E-38    | ** |
| siR_385083 | 3.2614   | 0.01    | -8.34934759  | 2.07E-27    | ** |
| siR_385116 | 1.6661   | 0.01    | -7.38033118  | 2.36E-14    | ** |
| siR_385123 | 1.5243   | 0.01    | -7.25200305  | 3.42E-13    | ** |
| siR_38515  | 1.6307   | 0.7086  | -1.20244802  | 0.001551793 | ** |
| siR_38517  | 1.1698   | 1.0442  | -0.16386383  | 0.664155115 |    |
| siR_385184 | 1.8079   | 0.01    | -7.49817107  | 1.63E-15    | ** |
| siR_3852   | 3.1905   | 1.1561  | -1.46451634  | 2.25E-07    | ** |
| siR_38523  | 38.4278  | 12.1951 | -1.6558488   | 6.76E-87    | ** |
| siR_38524  | 15.8461  | 5.072   | -1.64350116  | 1.83E-36    | ** |
| siR_385241 | 2.5878   | 0.01    | -8.0155823   | 6.75E-22    | ** |
| siR_385252 | 1.5952   | 0.01    | -7.31759351  | 8.99E-14    | ** |
| siR_38526  | 11.8048  | 2.6852  | -2.13627215  | 1.37E-38    | ** |
| siR_38527  | 7.2672   | 1.6409  | -2.14691229  | 1.73E-24    | ** |
| siR_38528  | 1.1698   | 0.1119  | -3.38597995  | 2.69E-07    | ** |
| siR_385294 | 5.3884   | 0.01    | -9.07371312  | 8.07E-45    | ** |
| siR_385305 | 1.6661   | 0.01    | -7.38033118  | 2.36E-14    | ** |
| siR_385345 | 4.2185   | 0.01    | -8.72058632  | 3.03E-35    | ** |
| siR_38535  | 0.01     | 1.0442  | 6.70625425   | 1.77E-09    | ** |
| siR_385359 | 2.127    | 0.01    | -7.73267621  | 3.99E-18    | ** |
| siR_38540  | 1.9143   | 0.0746  | -4.6814975   | 8.66E-14    | ** |
| siR_385419 | 1.7016   | 0.01    | -7.41074813  | 1.21E-14    | ** |

|            |         |         |              |             |    |
|------------|---------|---------|--------------|-------------|----|
| siR_385473 | 5.1757  | 0.01    | -9.01561019  | 4.44E-43    | ** |
| siR_385555 | 1.418   | 0.01    | -7.14771372  | 2.54E-12    | ** |
| siR_385616 | 1.1344  | 0.01    | -6.82578563  | 5.32E-10    | ** |
| siR_385651 | 1.5598  | 0.01    | -7.28521726  | 1.75E-13    | ** |
| siR_385697 | 1.0989  | 0.01    | -6.7799163   | 1.04E-09    | ** |
| siR_385713 | 1.1698  | 0.01    | -6.87011809  | 2.73E-10    | ** |
| siR_385732 | 1.028   | 0.01    | -6.68369645  | 3.95E-09    | ** |
| siR_385760 | 28.7145 | 0.01    | -11.48756376 | 9.60E-236   | ** |
| siR_385797 | 21.0218 | 0.01    | -11.03767036 | 8.85E-173   | ** |
| siR_38581  | 66.2914 | 37.5176 | -0.82125418  | 4.18E-50    |    |
| siR_385879 | 4.0058  | 0.01    | -8.64594661  | 1.67E-33    | ** |
| siR_385901 | 3.0487  | 0.01    | -8.25205038  | 1.14E-25    | ** |
| siR_385929 | 2.8714  | 0.01    | -8.16561052  | 3.22E-24    | ** |
| siR_386069 | 1.8079  | 0.01    | -7.49817107  | 1.63E-15    | ** |
| siR_386077 | 3.4741  | 0.01    | -8.44049549  | 3.76E-29    | ** |
| siR_38608  | 2.2333  | 1.1934  | -0.90409938  | 0.003250684 |    |
| siR_386133 | 3.1905  | 0.01    | -8.31763871  | 7.88E-27    | ** |
| siR_386205 | 17.9022 | 0.01    | -10.80592108 | 3.03E-147   | ** |
| siR_386206 | 1.8788  | 0.01    | -7.55366769  | 4.29E-16    | ** |
| siR_386211 | 3.545   | 0.01    | -8.4696418   | 9.89E-30    | ** |
| siR_386224 | 1.4534  | 0.01    | -7.18328801  | 1.30E-12    | ** |
| siR_386232 | 7.5508  | 0.01    | -9.56048567  | 1.61E-62    | ** |
| siR_386233 | 2.0206  | 0.01    | -7.65863995  | 2.96E-17    | ** |
| siR_386234 | 1.6307  | 0.01    | -7.34934759  | 4.61E-14    | ** |
| siR_386235 | 1.0989  | 0.01    | -6.7799163   | 1.04E-09    | ** |
| siR_386242 | 2.7651  | 0.01    | -8.11118786  | 2.39E-23    | ** |
| siR_386250 | 4.1831  | 0.01    | -8.70842867  | 5.92E-35    | ** |
| siR_386251 | 2.7296  | 0.01    | -8.09254576  | 4.66E-23    | ** |
| siR_386252 | 1.9143  | 0.01    | -7.58067313  | 2.20E-16    | ** |
| siR_386266 | 1.5243  | 0.01    | -7.25200305  | 3.42E-13    | ** |
| siR_386271 | 4.0413  | 0.01    | -8.65867564  | 8.57E-34    | ** |
| siR_386272 | 3.0841  | 0.01    | -8.26870574  | 5.85E-26    | ** |
| siR_386273 | 1.2762  | 0.01    | -6.99571063  | 3.67E-11    | ** |
| siR_386303 | 1.418   | 0.01    | -7.14771372  | 2.54E-12    | ** |
| siR_386333 | 10.1387 | 0.01    | -9.98565703  | 1.06E-83    | ** |
| siR_386334 | 4.3249  | 0.01    | -8.75652296  | 4.09E-36    | ** |
| siR_386335 | 3.1196  | 0.01    | -8.28521723  | 3.00E-26    | ** |
| siR_386345 | 21.9081 | 0.01    | -11.09724859 | 4.93E-180   | ** |
| siR_386346 | 8.6498  | 0.01    | -9.75652296  | 1.63E-71    | ** |
| siR_386347 | 2.836   | 0.01    | -8.14771372  | 6.28E-24    | ** |
| siR_386348 | 1.6661  | 0.01    | -7.38033118  | 2.36E-14    | ** |
| siR_386349 | 1.3825  | 0.01    | -7.11113566  | 4.95E-12    | ** |
| siR_386350 | 1.3116  | 0.01    | -7.035184    | 1.88E-11    | ** |
| siR_386374 | 5.3884  | 0.01    | -9.07371312  | 8.07E-45    | ** |
| siR_386382 | 15.208  | 0.01    | -10.57061463 | 3.41E-125   | ** |
| siR_386411 | 12.4784 | 0.01    | -10.28521723 | 7.50E-103   | ** |
| siR_386420 | 6.2037  | 0.01    | -9.27698508  | 1.71E-51    | ** |

|            |          |        |              |             |    |
|------------|----------|--------|--------------|-------------|----|
| siR_386421 | 1.9852   | 0.01   | -7.63314056  | 5.78E-17    | ** |
| siR_386431 | 354.2868 | 0.01   | -15.11263111 | 0           | ** |
| siR_386432 | 23.8933  | 0.01   | -11.2223903  | 2.78E-196   | ** |
| siR_386433 | 13.5064  | 0.01   | -10.39942755 | 2.89E-111   | ** |
| siR_386434 | 12.4075  | 0.01   | -10.2769968  | 2.85E-102   | ** |
| siR_386435 | 6.7      | 0.01   | -9.3880173   | 1.48E-55    | ** |
| siR_386436 | 4.254    | 0.01   | -8.73267624  | 1.56E-35    | ** |
| siR_386437 | 3.8995   | 0.01   | -8.60714536  | 1.24E-32    | ** |
| siR_386438 | 2.2333   | 0.01   | -7.80303324  | 5.38E-19    | ** |
| siR_386439 | 2.0206   | 0.01   | -7.65863995  | 2.96E-17    | ** |
| siR_386440 | 1.6307   | 0.01   | -7.34934759  | 4.61E-14    | ** |
| siR_386441 | 1.6307   | 0.01   | -7.34934759  | 4.61E-14    | ** |
| siR_386446 | 10.8831  | 0.01   | -10.08787391 | 8.55E-90    | ** |
| siR_386447 | 1.0635   | 0.01   | -6.73267622  | 2.02E-09    | ** |
| siR_386455 | 374.2097 | 0.01   | -15.1915585  | 0           | ** |
| siR_386456 | 14.5699  | 0.01   | -10.50877528 | 5.70E-120   | ** |
| siR_386457 | 7.6926   | 0.01   | -9.58732748  | 1.11E-63    | ** |
| siR_386458 | 7.1254   | 0.01   | -9.47682718  | 4.89E-59    | ** |
| siR_386459 | 7.09     | 0.01   | -9.46964185  | 9.53E-59    | ** |
| siR_386460 | 6.0265   | 0.01   | -9.23517658  | 4.83E-50    | ** |
| siR_386461 | 5.991    | 0.01   | -9.22665304  | 9.42E-50    | ** |
| siR_386462 | 3.864    | 0.01   | -8.59395129  | 2.42E-32    | ** |
| siR_386463 | 2.2333   | 0.01   | -7.80303324  | 5.38E-19    | ** |
| siR_386464 | 1.3825   | 0.01   | -7.11113566  | 4.95E-12    | ** |
| siR_386465 | 1.1698   | 0.01   | -6.87011809  | 2.73E-10    | ** |
| siR_386474 | 1.5952   | 0.01   | -7.31759351  | 8.99E-14    | ** |
| siR_386497 | 3.4032   | 0.01   | -8.41074813  | 1.43E-28    | ** |
| siR_386498 | 1.1698   | 0.01   | -6.87011809  | 2.73E-10    | ** |
| siR_386499 | 1.1344   | 0.01   | -6.82578563  | 5.32E-10    | ** |
| siR_386512 | 3.7931   | 0.01   | -8.56723361  | 9.20E-32    | ** |
| siR_386514 | 5.5302   | 0.01   | -9.11118782  | 5.57E-46    | ** |
| siR_386515 | 1.7016   | 0.01   | -7.41074813  | 1.21E-14    | ** |
| siR_386528 | 2.9778   | 0.01   | -8.21810305  | 4.34E-25    | ** |
| siR_386537 | 8.1889   | 0.01   | -9.6775259   | 9.64E-68    | ** |
| siR_386538 | 1.6307   | 0.01   | -7.34934759  | 4.61E-14    | ** |
| siR_386546 | 30.5579  | 0.01   | -11.57732977 | 7.84E-251   | ** |
| siR_386547 | 5.4593   | 0.01   | -9.09257214  | 2.12E-45    | ** |
| siR_386548 | 2.8714   | 0.01   | -8.16561052  | 3.22E-24    | ** |
| siR_386549 | 1.2053   | 0.01   | -6.91324847  | 1.40E-10    | ** |
| siR_386550 | 1.0989   | 0.01   | -6.7799163   | 1.04E-09    | ** |
| siR_386578 | 4.8566   | 0.01   | -8.92380283  | 1.82E-40    | ** |
| siR_386595 | 2.5524   | 0.01   | -7.99571063  | 1.32E-21    | ** |
| siR_386605 | 2.1624   | 0.01   | -7.75648961  | 2.05E-18    | ** |
| siR_386616 | 2.5524   | 0.01   | -7.99571063  | 1.32E-21    | ** |
| siR_386635 | 1.8079   | 0.01   | -7.49817107  | 1.63E-15    | ** |
| siR_38664  | 1.0989   | 0.5221 | -1.07366204  | 0.018227899 | *  |
| siR_386658 | 3.155    | 0.01   | -8.3014962   | 1.54E-26    | ** |



|            |         |        |              |            |    |
|------------|---------|--------|--------------|------------|----|
| siR_38666  | 8.7561  | 9.137  | 0.06143212   | 0.63612229 |    |
| siR_386663 | 1.028   | 0.01   | -6.68369645  | 3.95E-09   | ** |
| siR_386669 | 1.4889  | 0.01   | -7.21810305  | 6.67E-13   | ** |
| siR_386678 | 1.2762  | 0.01   | -6.99571063  | 3.67E-11   | ** |
| siR_386679 | 6.1683  | 0.01   | -9.26872915  | 3.34E-51   | ** |
| siR_386688 | 1.2407  | 0.01   | -6.95501051  | 7.17E-11   | ** |
| siR_386700 | 1.0989  | 0.01   | -6.7799163   | 1.04E-09   | ** |
| siR_386703 | 20.561  | 0.01   | -11.00569462 | 5.23E-169  | ** |
| siR_386707 | 2.8005  | 0.01   | -8.12954063  | 1.23E-23   | ** |
| siR_386708 | 1.7016  | 0.01   | -7.41074813  | 1.21E-14   | ** |
| siR_386709 | 1.6661  | 0.01   | -7.38033118  | 2.36E-14   | ** |
| siR_386715 | 2.0561  | 0.01   | -7.68376661  | 1.52E-17   | ** |
| siR_386717 | 2.5169  | 0.01   | -7.97550407  | 2.57E-21   | ** |
| siR_386718 | 8.6143  | 0.01   | -9.75058979  | 3.18E-71   | ** |
| siR_38672  | 9.7133  | 3.3192 | -1.54912596  | 3.29E-21   | ** |
| siR_386746 | 5.4593  | 0.01   | -9.09257214  | 2.12E-45   | ** |
| siR_386757 | 16.9096 | 0.01   | -10.72362693 | 4.03E-139  | ** |
| siR_386771 | 2.5524  | 0.01   | -7.99571063  | 1.32E-21   | ** |
| siR_386778 | 22.1562 | 0.01   | -11.11349486 | 4.59E-182  | ** |
| siR_386794 | 5.7783  | 0.01   | -9.17450131  | 5.19E-48   | ** |
| siR_386795 | 1.028   | 0.01   | -6.68369645  | 3.95E-09   | ** |
| siR_386816 | 2.3751  | 0.01   | -7.89184446  | 3.72E-20   | ** |
| siR_386827 | 2.7296  | 0.01   | -8.09254576  | 4.66E-23   | ** |
| siR_386829 | 5.6365  | 0.01   | -9.13865581  | 7.51E-47   | ** |
| siR_386835 | 5.672   | 0.01   | -9.14771376  | 3.85E-47   | ** |
| siR_386836 | 3.3677  | 0.01   | -8.39561983  | 2.79E-28   | ** |
| siR_386837 | 2.3751  | 0.01   | -7.89184446  | 3.72E-20   | ** |
| siR_386840 | 1.2053  | 0.01   | -6.91324847  | 1.40E-10   | ** |
| siR_386850 | 7.7281  | 0.01   | -9.59396997  | 5.71E-64   | ** |
| siR_386851 | 4.2185  | 0.01   | -8.72058632  | 3.03E-35   | ** |
| siR_386852 | 2.9069  | 0.01   | -8.18333764  | 1.65E-24   | ** |
| siR_386853 | 1.028   | 0.01   | -6.68369645  | 3.95E-09   | ** |
| siR_386861 | 28.1118 | 0.01   | -11.45696015 | 8.22E-231  | ** |
| siR_386862 | 4.8212  | 0.01   | -8.91324847  | 3.54E-40   | ** |
| siR_386863 | 2.9423  | 0.01   | -8.20080054  | 8.47E-25   | ** |
| siR_386864 | 1.5952  | 0.01   | -7.31759351  | 8.99E-14   | ** |
| siR_386865 | 1.2407  | 0.01   | -6.95501051  | 7.17E-11   | ** |
| siR_386866 | 1.2053  | 0.01   | -6.91324847  | 1.40E-10   | ** |
| siR_386874 | 4.2894  | 0.01   | -8.74463204  | 7.97E-36   | ** |
| siR_386875 | 4.2185  | 0.01   | -8.72058632  | 3.03E-35   | ** |
| siR_386882 | 6.1683  | 0.01   | -9.26872915  | 3.34E-51   | ** |
| siR_386884 | 1.9143  | 0.01   | -7.58067313  | 2.20E-16   | ** |
| siR_386902 | 4.7148  | 0.01   | -8.88105279  | 2.63E-39   | ** |
| siR_38691  | 0.01    | 1.3053 | 7.02823761   | 1.15E-11   | ** |
| siR_386933 | 1.1344  | 0.01   | -6.82578563  | 5.32E-10   | ** |
| siR_38694  | 0.01    | 4.3261 | 8.7569232    | 5.97E-37   | ** |
| siR_386940 | 2.5169  | 0.01   | -7.97550407  | 2.57E-21   | ** |

|            |           |         |               |            |    |
|------------|-----------|---------|---------------|------------|----|
| siR_386943 | 5. 6011   | 0. 01   | -9. 12956637  | 1. 46E-46  | ** |
| siR_386969 | 4. 6794   | 0. 01   | -8. 87017976  | 5. 13E-39  | ** |
| siR_386970 | 4. 5021   | 0. 01   | -8. 81445427  | 1. 45E-37  | ** |
| siR_386971 | 1. 3116   | 0. 01   | -7. 035184    | 1. 88E-11  | ** |
| siR_38699  | 0. 01     | 1. 7901 | 7. 48389637   | 1. 01E-15  | ** |
| siR_387003 | 1. 9143   | 0. 01   | -7. 58067313  | 2. 20E-16  | ** |
| siR_387043 | 2. 836    | 0. 01   | -8. 14771372  | 6. 28E-24  | ** |
| siR_387072 | 3. 7931   | 0. 01   | -8. 56723361  | 9. 20E-32  | ** |
| siR_387112 | 11. 3085  | 0. 01   | -10. 14319183 | 2. 82E-93  | ** |
| siR_387113 | 1. 9852   | 0. 01   | -7. 63314056  | 5. 78E-17  | ** |
| siR_387214 | 1. 4889   | 0. 01   | -7. 21810305  | 6. 67E-13  | ** |
| siR_387238 | 28. 9626  | 0. 01   | -11. 49997528 | 8. 94E-238 | ** |
| siR_387299 | 22. 6525  | 0. 01   | -11. 14545449 | 3. 98E-186 | ** |
| siR_387307 | 1. 1698   | 0. 01   | -6. 87011809  | 2. 73E-10  | ** |
| siR_387309 | 1. 6661   | 0. 01   | -7. 38033118  | 2. 36E-14  | ** |
| siR_387342 | 1. 2762   | 0. 01   | -6. 99571063  | 3. 67E-11  | ** |
| siR_387376 | 4. 1831   | 0. 01   | -8. 70842867  | 5. 92E-35  | ** |
| siR_387410 | 19. 8165  | 0. 01   | -10. 9524864  | 6. 49E-163 | ** |
| siR_387429 | 1. 0635   | 0. 01   | -6. 73267622  | 2. 02E-09  | ** |
| siR_38748  | 9. 926    | 3. 6175 | -1. 45621944  | 6. 89E-20  | ** |
| siR_387520 | 3. 7222   | 0. 01   | -8. 54001177  | 3. 50E-31  | ** |
| siR_387521 | 47. 2193  | 0. 01   | -12. 20516102 | 0          | ** |
| siR_387538 | 4. 1122   | 0. 01   | -8. 68376664  | 2. 25E-34  | ** |
| siR_387624 | 2. 5524   | 0. 01   | -7. 99571063  | 1. 32E-21  | ** |
| siR_387625 | 1. 6661   | 0. 01   | -7. 38033118  | 2. 36E-14  | ** |
| siR_387637 | 1. 028    | 0. 01   | -6. 68369645  | 3. 95E-09  | ** |
| siR_387642 | 2. 1979   | 0. 01   | -7. 77998195  | 1. 05E-18  | ** |
| siR_387691 | 1. 737    | 0. 01   | -7. 44045394  | 6. 21E-15  | ** |
| siR_38770  | 0. 01     | 3. 0208 | 8. 23878686   | 5. 04E-26  | ** |
| siR_387718 | 1. 1344   | 0. 01   | -6. 82578563  | 5. 32E-10  | ** |
| siR_38773  | 0. 0354   | 2. 4987 | 6. 14128453   | 4. 24E-20  | ** |
| siR_387751 | 1. 3116   | 0. 01   | -7. 035184    | 1. 88E-11  | ** |
| siR_387756 | 1. 1698   | 0. 01   | -6. 87011809  | 2. 73E-10  | ** |
| siR_387765 | 2. 3397   | 0. 01   | -7. 87017976  | 7. 25E-20  | ** |
| siR_387768 | 1. 5952   | 0. 01   | -7. 31759351  | 8. 99E-14  | ** |
| siR_38778  | 0. 01     | 3. 1327 | 8. 29126281   | 5. 83E-27  | ** |
| siR_387789 | 3. 7222   | 0. 01   | -8. 54001177  | 3. 50E-31  | ** |
| siR_387814 | 1. 2762   | 0. 01   | -6. 99571063  | 3. 67E-11  | ** |
| siR_387829 | 179. 1995 | 0. 01   | -14. 12927969 | 0          | ** |
| siR_387830 | 1. 737    | 0. 01   | -7. 44045394  | 6. 21E-15  | ** |
| siR_387831 | 1. 028    | 0. 01   | -6. 68369645  | 3. 95E-09  | ** |
| siR_387845 | 1. 8079   | 0. 01   | -7. 49817107  | 1. 63E-15  | ** |
| siR_38785  | 1. 4534   | 0. 4102 | -1. 82503241  | 4. 93E-05  | ** |
| siR_387901 | 5. 7429   | 0. 01   | -9. 16563566  | 1. 01E-47  | ** |
| siR_387912 | 47. 2548  | 0. 01   | -12. 20624526 | 0          | ** |
| siR_387921 | 1. 4889   | 0. 01   | -7. 21810305  | 6. 67E-13  | ** |
| siR_388117 | 111. 5256 | 0. 01   | -13. 44508748 | 0          | ** |

|            |          |         |              |             |    |
|------------|----------|---------|--------------|-------------|----|
| siR_38813  | 5.5302   | 2.6479  | -1.06248302  | 1.05E-07    | ** |
| siR_38814  | 1.1698   | 0.5967  | -0.97118421  | 0.024714955 |    |
| siR_388142 | 2.0915   | 0.01    | -7.70839418  | 7.79E-18    | ** |
| siR_388151 | 11.8403  | 0.01    | -10.20948991 | 1.25E-97    | ** |
| siR_38818  | 4.7503   | 3.0581  | -0.63538304  | 0.001503694 |    |
| siR_38823  | 1.1344   | 0.2238  | -2.3416475   | 2.83E-05    | ** |
| siR_388411 | 15.2435  | 0.01    | -10.57397852 | 1.75E-125   | ** |
| siR_388436 | 111.6319 | 0.01    | -13.4464622  | 0           | ** |
| siR_388445 | 1.028    | 0.01    | -6.68369645  | 3.95E-09    | ** |
| siR_388464 | 2.0206   | 0.01    | -7.65863995  | 2.96E-17    | ** |
| siR_388494 | 3.7222   | 0.01    | -8.54001177  | 3.50E-31    | ** |
| siR_388559 | 7.8344   | 0.01    | -9.61367902  | 7.69E-65    | ** |
| siR_38858  | 2.3042   | 0.8578  | -1.42555272  | 1.69E-05    | ** |
| siR_388594 | 9.3942   | 0.01    | -9.8756265   | 1.31E-77    | ** |
| siR_388607 | 2.4815   | 0.01    | -7.95506863  | 5.01E-21    | ** |
| siR_388612 | 2.3397   | 0.01    | -7.87017976  | 7.25E-20    | ** |
| siR_388613 | 2.4106   | 0.01    | -7.91324847  | 1.91E-20    | ** |
| siR_388621 | 2.3751   | 0.01    | -7.89184446  | 3.72E-20    | ** |
| siR_388646 | 2.1979   | 0.01    | -7.77998195  | 1.05E-18    | ** |
| siR_388650 | 1.3825   | 0.01    | -7.11113566  | 4.95E-12    | ** |
| siR_388654 | 5.6011   | 0.01    | -9.12956637  | 1.46E-46    | ** |
| siR_38867  | 2.3042   | 0.4475  | -2.36430636  | 1.35E-09    | ** |
| siR_388792 | 10.1032  | 0.01    | -9.98059662  | 2.07E-83    | ** |
| siR_388834 | 19.8874  | 0.01    | -10.95763907 | 1.71E-163   | ** |
| siR_388838 | 4.5021   | 0.01    | -8.81445427  | 1.45E-37    | ** |
| siR_38889  | 1.2053   | 0.4102  | -1.55499288  | 0.000989728 | ** |
| siR_38891  | 1.5952   | 0.7086  | -1.17069394  | 0.002183895 | ** |
| siR_388913 | 1.5952   | 0.01    | -7.31759351  | 8.99E-14    | ** |
| siR_388917 | 1.418    | 0.01    | -7.14771372  | 2.54E-12    | ** |
| siR_38897  | 8.2953   | 4.7363  | -0.80853369  | 2.15E-07    |    |
| siR_389039 | 1.1698   | 0.01    | -6.87011809  | 2.73E-10    | ** |
| siR_38904  | 3.0132   | 2.2376  | -0.42934428  | 0.077239741 |    |
| siR_389130 | 4.0413   | 0.01    | -8.65867564  | 8.57E-34    | ** |
| siR_389131 | 3.9704   | 0.01    | -8.63314056  | 3.26E-33    | ** |
| siR_389255 | 1.6307   | 0.01    | -7.34934759  | 4.61E-14    | ** |
| siR_389319 | 3.545    | 0.01    | -8.4696418   | 9.89E-30    | ** |
| siR_389331 | 4.5376   | 0.01    | -8.82578561  | 7.42E-38    | ** |
| siR_389526 | 2.0561   | 0.01    | -7.68376661  | 1.52E-17    | ** |
| siR_389544 | 1.8434   | 0.01    | -7.52622535  | 8.37E-16    | ** |
| siR_389589 | 1.418    | 0.01    | -7.14771372  | 2.54E-12    | ** |
| siR_389633 | 1.7016   | 0.01    | -7.41074813  | 1.21E-14    | ** |
| siR_389711 | 2.127    | 0.01    | -7.73267621  | 3.99E-18    | ** |
| siR_389724 | 1.3825   | 0.01    | -7.11113566  | 4.95E-12    | ** |
| siR_389735 | 1.8788   | 0.01    | -7.55366769  | 4.29E-16    | ** |
| siR_389756 | 2.127    | 0.01    | -7.73267621  | 3.99E-18    | ** |
| siR_38976  | 0.01     | 10.9271 | 10.09369485  | 3.31E-92    | ** |
| siR_38978  | 0.01     | 2.0512  | 7.68032436   | 6.59E-18    | ** |

|            |          |         |              |             |    |
|------------|----------|---------|--------------|-------------|----|
| siR_389791 | 40.7674  | 0.01    | -11.99320043 | 0           | ** |
| siR_38980  | 0.01     | 3.1327  | 8.29126281   | 5.83E-27    | ** |
| siR_38982  | 0.01     | 6.0416  | 9.23878686   | 2.60E-51    | ** |
| siR_389828 | 2.2688   | 0.01    | -7.82578561  | 2.76E-19    | ** |
| siR_389913 | 4.8566   | 0.01    | -8.92380283  | 1.82E-40    | ** |
| siR_38992  | 5.9201   | 1.7901  | -1.72558136  | 1.68E-15    | ** |
| siR_389926 | 1.1698   | 0.01    | -6.87011809  | 2.73E-10    | ** |
| siR_390068 | 1.0635   | 0.01    | -6.73267622  | 2.02E-09    | ** |
| siR_390114 | 2.6233   | 0.01    | -8.035239    | 3.46E-22    | ** |
| siR_39013  | 1.0989   | 0.4102  | -1.42166071  | 0.003288611 | ** |
| siR_390143 | 4.254    | 0.01    | -8.73267624  | 1.56E-35    | ** |
| siR_390145 | 1.5243   | 0.01    | -7.25200305  | 3.42E-13    | ** |
| siR_390273 | 7.1963   | 0.01    | -9.49111151  | 1.28E-59    | ** |
| siR_390389 | 1.4534   | 0.01    | -7.18328801  | 1.30E-12    | ** |
| siR_39060  | 1.0989   | 0.4848  | -1.1805985   | 0.010852128 | *  |
| siR_39061  | 26.8711  | 5.2584  | -2.35335959  | 2.43E-96    | ** |
| siR_390746 | 1.3825   | 0.01    | -7.1113566   | 4.95E-12    | ** |
| siR_39080  | 0.01     | 2.2003  | 7.78155643   | 3.72E-19    | ** |
| siR_39081  | 332.1306 | 87.5287 | -1.9239226   | 0           | ** |
| siR_39082  | 1.3825   | 0.7086  | -0.96423611  | 0.014998473 |    |
| siR_390837 | 1.2053   | 0.01    | -6.91324847  | 1.40E-10    | ** |
| siR_39094  | 1.028    | 0.5221  | -0.9774422   | 0.034659916 |    |
| siR_390994 | 5.7783   | 0.01    | -9.17450131  | 5.19E-48    | ** |
| siR_39107  | 1.8434   | 1.0442  | -0.81997109  | 0.014012732 |    |
| siR_391100 | 37.3288  | 0.01    | -11.86607327 | 2.98E-306   | ** |
| siR_391101 | 1.028    | 0.01    | -6.68369645  | 3.95E-09    | ** |
| siR_391135 | 4.963    | 0.01    | -8.95506867  | 2.45E-41    | ** |
| siR_391447 | 9.7842   | 0.01    | -9.93431004  | 8.45E-81    | ** |
| siR_391489 | 2.8714   | 0.01    | -8.16561052  | 3.22E-24    | ** |
| siR_391568 | 1.028    | 0.01    | -6.68369645  | 3.95E-09    | ** |
| siR_391621 | 1.2053   | 0.01    | -6.91324847  | 1.40E-10    | ** |
| siR_391869 | 168.6354 | 0.01    | -14.04162053 | 0           | ** |
| siR_391870 | 20.8091  | 0.01    | -11.02299881 | 4.87E-171   | ** |
| siR_391871 | 11.5921  | 0.01    | -10.17892617 | 1.35E-95    | ** |
| siR_391872 | 6.4164   | 0.01    | -9.3256203   | 3.11E-53    | ** |
| siR_391873 | 3.3323   | 0.01    | -8.38037447  | 5.44E-28    | ** |
| siR_391874 | 3.2259   | 0.01    | -8.33355791  | 4.04E-27    | ** |
| siR_391875 | 2.6587   | 0.01    | -8.05457718  | 1.77E-22    | ** |
| siR_391876 | 1.8079   | 0.01    | -7.49817107  | 1.63E-15    | ** |
| siR_391877 | 1.4889   | 0.01    | -7.21810305  | 6.67E-13    | ** |
| siR_391914 | 2.5878   | 0.01    | -8.0155823   | 6.75E-22    | ** |
| siR_39198  | 1.7016   | 0.3729  | -2.19003124  | 7.23E-07    | ** |
| siR_392020 | 4.8212   | 0.01    | -8.91324847  | 3.54E-40    | ** |
| siR_39226  | 1.0989   | 0.4848  | -1.1805985   | 0.010852128 | *  |
| siR_392338 | 3.0487   | 0.01    | -8.25205038  | 1.14E-25    | ** |
| siR_392339 | 1.4534   | 0.01    | -7.18328801  | 1.30E-12    | ** |
| siR_39243  | 2.4106   | 1.3426  | -0.84436273  | 0.003887492 |    |

|            |         |        |              |             |    |
|------------|---------|--------|--------------|-------------|----|
| siR_392451 | 2.7651  | 0.01   | -8.11118786  | 2.39E-23    | ** |
| siR_392465 | 1.5952  | 0.01   | -7.31759351  | 8.99E-14    | ** |
| siR_392473 | 1.1344  | 0.01   | -6.82578563  | 5.32E-10    | ** |
| siR_392495 | 3.0132  | 0.01   | -8.23515263  | 2.23E-25    | ** |
| siR_392497 | 4.2185  | 0.01   | -8.72058632  | 3.03E-35    | ** |
| siR_392514 | 10.635  | 0.01   | -10.0546043  | 9.19E-88    | ** |
| siR_392555 | 2.5878  | 0.01   | -8.0155823   | 6.75E-22    | ** |
| siR_392599 | 99.4726 | 0.01   | -13.28008342 | 0           | ** |
| siR_392600 | 2.8714  | 0.01   | -8.16561052  | 3.22E-24    | ** |
| siR_392605 | 3.5804  | 0.01   | -8.48397698  | 5.07E-30    | ** |
| siR_392648 | 1.2762  | 0.01   | -6.99571063  | 3.67E-11    | ** |
| siR_39269  | 5.282   | 3.1327 | -0.75367768  | 0.000100125 |    |
| siR_392706 | 2.0915  | 0.01   | -7.70839418  | 7.79E-18    | ** |
| siR_392796 | 1.5243  | 0.01   | -7.25200305  | 3.42E-13    | ** |
| siR_392949 | 57.9252 | 0.01   | -12.49997569 | 0           | ** |
| siR_39296  | 1.9143  | 0.7459 | -1.35976281  | 0.000158111 | ** |
| siR_393005 | 2.9778  | 0.01   | -8.21810305  | 4.34E-25    | ** |
| siR_39307  | 1.5243  | 0.1492 | -3.35282743  | 4.13E-09    | ** |
| siR_393073 | 1.5243  | 0.01   | -7.25200305  | 3.42E-13    | ** |
| siR_39326  | 9.0752  | 8.503  | -0.0939575   | 0.475745398 |    |
| siR_393262 | 1.0635  | 0.01   | -6.73267622  | 2.02E-09    | ** |
| siR_39327  | 1.1698  | 0.4475 | -1.38630231  | 0.002893159 | ** |
| siR_3933   | 4.3603  | 0.7832 | -2.47697473  | 7.39E-18    | ** |
| siR_393322 | 3.3677  | 0.01   | -8.39561983  | 2.79E-28    | ** |
| siR_393347 | 3.7222  | 0.01   | -8.54001177  | 3.50E-31    | ** |
| siR_393358 | 1.418   | 0.01   | -7.14771372  | 2.54E-12    | ** |
| siR_39338  | 1.0989  | 0.2611 | -2.07338574  | 0.000132441 | ** |
| siR_393385 | 1.9497  | 0.01   | -7.60710834  | 1.13E-16    | ** |
| siR_393419 | 1.9497  | 0.01   | -7.60710834  | 1.13E-16    | ** |
| siR_393429 | 1.4534  | 0.01   | -7.18328801  | 1.30E-12    | ** |
| siR_39343  | 0.01    | 1.4918 | 7.22091032   | 3.17E-13    | ** |
| siR_393464 | 4.0767  | 0.01   | -8.67125799  | 4.39E-34    | ** |
| siR_393550 | 1.1698  | 0.01   | -6.87011809  | 2.73E-10    | ** |
| siR_393551 | 1.028   | 0.01   | -6.68369645  | 3.95E-09    | ** |
| siR_393563 | 3.1196  | 0.01   | -8.28521723  | 3.00E-26    | ** |
| siR_393588 | 1.1344  | 0.01   | -6.82578563  | 5.32E-10    | ** |
| siR_393606 | 1.2407  | 0.01   | -6.95501051  | 7.17E-11    | ** |
| siR_39362  | 3.2259  | 1.8647 | -0.79075817  | 0.001562047 |    |
| siR_393643 | 2.1624  | 0.01   | -7.75648961  | 2.05E-18    | ** |
| siR_393645 | 11.0249 | 0.01   | -10.10654986 | 5.91E-91    | ** |
| siR_39365  | 1.7725  | 0.7086 | -1.32274226  | 0.000375473 | ** |
| siR_393671 | 2.5169  | 0.01   | -7.97550407  | 2.57E-21    | ** |
| siR_393742 | 3.4032  | 0.01   | -8.41074813  | 1.43E-28    | ** |
| siR_393747 | 1.3825  | 0.01   | -7.11113566  | 4.95E-12    | ** |
| siR_393752 | 1.0635  | 0.01   | -6.73267622  | 2.02E-09    | ** |
| siR_393809 | 4.8212  | 0.01   | -8.91324847  | 3.54E-40    | ** |
| siR_393810 | 3.3323  | 0.01   | -8.38037447  | 5.44E-28    | ** |

|            |          |         |               |              |    |
|------------|----------|---------|---------------|--------------|----|
| siR_393841 | 1. 5598  | 0. 01   | -7. 28521726  | 1. 75E-13    | ** |
| siR_393851 | 3. 7931  | 0. 01   | -8. 56723361  | 9. 20E-32    | ** |
| siR_393923 | 1. 2762  | 0. 01   | -6. 99571063  | 3. 67E-11    | ** |
| siR_39393  | 1. 7725  | 0. 2984 | -2. 57046619  | 2. 67E-08    | ** |
| siR_393930 | 2. 6942  | 0. 01   | -8. 07371315  | 9. 10E-23    | ** |
| siR_39402  | 1. 8079  | 0. 9696 | -0. 89885328  | 0. 008533461 |    |
| siR_394065 | 10. 7768 | 0. 01   | -10. 07371319 | 6. 35E-89    | ** |
| siR_394070 | 1. 1344  | 0. 01   | -6. 82578563  | 5. 32E-10    | ** |
| siR_394109 | 2. 0561  | 0. 01   | -7. 68376661  | 1. 52E-17    | ** |
| siR_394111 | 1. 3825  | 0. 01   | -7. 11113566  | 4. 95E-12    | ** |
| siR_394115 | 3. 9704  | 0. 01   | -8. 63314056  | 3. 26E-33    | ** |
| siR_39412  | 4. 7148  | 2. 6479 | -0. 83234794  | 6. 27E-05    |    |
| siR_394144 | 4. 3958  | 0. 01   | -8. 77998192  | 1. 07E-36    | ** |
| siR_394153 | 1. 0989  | 0. 01   | -6. 7799163   | 1. 04E-09    | ** |
| siR_394172 | 3. 4032  | 0. 01   | -8. 41074813  | 1. 43E-28    | ** |
| siR_394249 | 6. 7     | 0. 01   | -9. 3880173   | 1. 48E-55    | ** |
| siR_394300 | 1. 5952  | 0. 01   | -7. 31759351  | 8. 99E-14    | ** |
| siR_394318 | 1. 6307  | 0. 01   | -7. 34934759  | 4. 61E-14    | ** |
| siR_39433  | 2. 6233  | 2. 8343 | 0. 11160967   | 0. 634985494 |    |
| siR_39435  | 1. 8788  | 2. 0885 | 0. 15265564   | 0. 580718299 |    |
| siR_394397 | 1. 3825  | 0. 01   | -7. 11113566  | 4. 95E-12    | ** |
| siR_394441 | 1. 0635  | 0. 01   | -6. 73267622  | 2. 02E-09    | ** |
| siR_394448 | 2. 127   | 0. 01   | -7. 73267621  | 3. 99E-18    | ** |
| siR_394449 | 1. 3116  | 0. 01   | -7. 035184    | 1. 88E-11    | ** |
| siR_394461 | 3. 3677  | 0. 01   | -8. 39561983  | 2. 79E-28    | ** |
| siR_394474 | 1. 1698  | 0. 01   | -6. 87011809  | 2. 73E-10    | ** |
| siR_39449  | 11. 3085 | 2. 0139 | -2. 48934362  | 3. 17E-44    | ** |
| siR_39450  | 1. 028   | 0. 2238 | -2. 19955832  | 0. 000127871 | ** |
| siR_39451  | 1. 1698  | 0. 0373 | -4. 97094246  | 4. 79E-09    | ** |
| siR_394535 | 1. 1344  | 0. 01   | -6. 82578563  | 5. 32E-10    | ** |
| siR_39455  | 10. 2805 | 3. 2819 | -1. 64730725  | 2. 75E-24    | ** |
| siR_394558 | 1. 2407  | 0. 01   | -6. 95501051  | 7. 17E-11    | ** |
| siR_394559 | 1. 9143  | 0. 01   | -7. 58067313  | 2. 20E-16    | ** |
| siR_39458  | 12. 1948 | 2. 4241 | -2. 33074498  | 3. 85E-44    | ** |
| siR_394581 | 4. 8921  | 0. 01   | -8. 93431011  | 9. 31E-41    | ** |
| siR_394662 | 2. 9069  | 0. 01   | -8. 18333764  | 1. 65E-24    | ** |
| siR_394691 | 6. 7709  | 0. 01   | -9. 40320384  | 3. 90E-56    | ** |
| siR_394798 | 1. 5243  | 0. 01   | -7. 25200305  | 3. 42E-13    | ** |
| siR_39480  | 3. 545   | 0. 2611 | -3. 76311127  | 1. 94E-21    | ** |
| siR_394805 | 5. 4593  | 0. 01   | -9. 09257214  | 2. 12E-45    | ** |
| siR_39481  | 1. 0635  | 0. 0746 | -3. 83350059  | 2. 71E-07    | ** |
| siR_394849 | 1. 5243  | 0. 01   | -7. 25200305  | 3. 42E-13    | ** |
| siR_394910 | 1. 737   | 0. 01   | -7. 44045394  | 6. 21E-15    | ** |
| siR_39492  | 0. 01    | 3. 2819 | 8. 35838747   | 3. 29E-28    | ** |
| siR_39495  | 1. 737   | 0. 5967 | -1. 54152007  | 7. 89E-05    | ** |
| siR_394953 | 3. 5804  | 0. 01   | -8. 48397698  | 5. 07E-30    | ** |
| siR_394986 | 3. 4032  | 0. 01   | -8. 41074813  | 1. 43E-28    | ** |

|            |         |        |              |               |    |
|------------|---------|--------|--------------|---------------|----|
| siR_395036 | 2.1624  | 0.01   | -7.75648961  | 2.05E-18      | ** |
| siR_39507  | 0.01    | 2.163  | 7.75688986   | 7.63E-19      | ** |
| siR_395071 | 1.1344  | 0.01   | -6.82578563  | 5.32E-10      | ** |
| siR_395077 | 5.6365  | 0.01   | -9.13865581  | 7.51E-47      | ** |
| siR_395102 | 1.2053  | 0.01   | -6.91324847  | 1.40E-10      | ** |
| siR_39512  | 3.0487  | 1.6782 | -0.86127953  | 0.000943813   |    |
| siR_395136 | 1.1344  | 0.01   | -6.82578563  | 5.32E-10      | ** |
| siR_395138 | 23.9287 | 0.01   | -11.22452631 | 1.42E-196     | ** |
| siR_395139 | 1.0989  | 0.01   | -6.7799163   | 1.04E-09      | ** |
| siR_395237 | 18.2567 | 0.01   | -10.83421034 | 3.79E-150     | ** |
| siR_395264 | 1.5598  | 0.01   | -7.28521726  | 1.75E-13      | ** |
| siR_395266 | 2.2688  | 0.01   | -7.82578561  | 2.76E-19      | ** |
| siR_3953   | 0.01    | 3.5802 | 8.48389637   | 1.05E-30      | ** |
| siR_395307 | 1.9497  | 0.01   | -7.60710834  | 1.13E-16      | ** |
| siR_395349 | 1.1344  | 0.01   | -6.82578563  | 5.32E-10      | ** |
| siR_395375 | 2.8005  | 0.01   | -8.12954063  | 1.23E-23      | ** |
| siR_395376 | 2.1979  | 0.01   | -7.77998195  | 1.05E-18      | ** |
| siR_3954   | 0.01    | 1.6782 | 7.39077085   | 8.72E-15      | ** |
| siR_395401 | 8.5434  | 0.01   | -9.7386665   | 1.21E-70      | ** |
| siR_395402 | 6.6291  | 0.01   | -9.37266921  | 5.64E-55      | ** |
| siR_395403 | 1.0635  | 0.01   | -6.73267622  | 2.02E-09      | ** |
| siR_39543  | 6.3101  | 5.0347 | -0.32575705  | 0.04758728    |    |
| siR_395436 | 2.3042  | 0.01   | -7.84812212  | 1.41E-19      | ** |
| siR_395457 | 1.1344  | 0.01   | -6.82578563  | 5.32E-10      | ** |
| siR_3955   | 0.01    | 1.2307 | 6.94333532   | 4.86E-11      | ** |
| siR_395515 | 3.155   | 0.01   | -8.3014962   | 1.54E-26      | ** |
| siR_395516 | 38.0378 | 0.01   | -11.89321799 | 367689650498e | ** |
| siR_395565 | 1.5243  | 0.01   | -7.25200305  | 3.42E-13      | ** |
| siR_39557  | 1.3116  | 0.9696 | -0.4358662   | 0.240578977   |    |
| siR_395582 | 6.0265  | 0.01   | -9.23517658  | 4.83E-50      | ** |
| siR_395585 | 8.0117  | 0.01   | -9.64596464  | 2.72E-66      | ** |
| siR_395588 | 3.9349  | 0.01   | -8.62018319  | 6.36E-33      | ** |
| siR_395664 | 7.409   | 0.01   | -9.53313504  | 2.33E-61      | ** |
| siR_395675 | 7.2672  | 0.01   | -9.5052558   | 3.38E-60      | ** |
| siR_39569  | 1.2053  | 0.3356 | -1.84457766  | 0.000205328   | ** |
| siR_39570  | 6.3101  | 0.8205 | -2.94308763  | 4.52E-30      | ** |
| siR_395730 | 2.446   | 0.01   | -7.93428061  | 9.77E-21      | ** |
| siR_395737 | 1.418   | 0.01   | -7.14771372  | 2.54E-12      | ** |
| siR_395788 | 1.6661  | 0.01   | -7.38033118  | 2.36E-14      | ** |
| siR_395789 | 1.0989  | 0.01   | -6.7799163   | 1.04E-09      | ** |
| siR_395817 | 1.8788  | 0.01   | -7.55366769  | 4.29E-16      | ** |
| siR_395869 | 3.9704  | 0.01   | -8.63314056  | 3.26E-33      | ** |
| siR_395921 | 2.127   | 0.01   | -7.73267621  | 3.99E-18      | ** |
| siR_39597  | 1.2762  | 0.1492 | -3.096535    | 2.35E-07      | ** |
| siR_396    | 4.0058  | 2.2376 | -0.84013823  | 0.000202359   |    |
| siR_39601  | 2.5524  | 0.8205 | -1.6372792   | 5.28E-07      | ** |
| siR_396035 | 1.3471  | 0.01   | -7.07371314  | 9.66E-12      | ** |

|            |         |         |              |             |    |
|------------|---------|---------|--------------|-------------|----|
| siR_396084 | 19.2848 | 0.01    | -10.91324847 | 1.46E-158   | ** |
| siR_3961   | 0.01    | 21.7423 | 11.08628885  | 9.72E-183   | ** |
| siR_396132 | 5.2111  | 0.01    | -9.02544416  | 2.28E-43    | ** |
| siR_39617  | 1.737   | 1.1188  | -0.6346456   | 0.056663274 |    |
| siR_396175 | 1.5243  | 0.01    | -7.25200305  | 3.42E-13    | ** |
| siR_396178 | 1.9497  | 0.01    | -7.60710834  | 1.13E-16    | ** |
| siR_39619  | 70.1909 | 19.1318 | -1.87531139  | 1.67E-186   | ** |
| siR_3962   | 0.01    | 1.3799  | 7.10841991   | 2.74E-12    | ** |
| siR_396232 | 1.737   | 0.01    | -7.44045394  | 6.21E-15    | ** |
| siR_396262 | 2.2688  | 0.01    | -7.82578561  | 2.76E-19    | ** |
| siR_39633  | 3.3677  | 1.9766  | -0.76874268  | 0.001607477 |    |
| siR_396418 | 1.3471  | 0.01    | -7.07371314  | 9.66E-12    | ** |
| siR_396492 | 3.155   | 0.01    | -8.3014962   | 1.54E-26    | ** |
| siR_396505 | 1.4534  | 0.01    | -7.18328801  | 1.30E-12    | ** |
| siR_39658  | 3.545   | 2.0139  | -0.81579358  | 0.000656321 |    |
| siR_396607 | 2.2688  | 0.01    | -7.82578561  | 2.76E-19    | ** |
| siR_39661  | 2.3042  | 1.3799  | -0.73970223  | 0.011805198 |    |
| siR_396723 | 2.836   | 0.01    | -8.14771372  | 6.28E-24    | ** |
| siR_396727 | 6.9482  | 0.01    | -9.44049544  | 1.38E-57    | ** |
| siR_396740 | 2.0561  | 0.01    | -7.68376661  | 1.52E-17    | ** |
| siR_39677  | 0.01    | 2.6479  | 8.04870483   | 6.67E-23    | ** |
| siR_396784 | 1.1698  | 0.01    | -6.87011809  | 2.73E-10    | ** |
| siR_396800 | 14.0736 | 0.01    | -10.4587756  | 6.57E-116   | ** |
| siR_39681  | 1.9852  | 0.7086  | -1.48624099  | 3.88E-05    | ** |
| siR_396818 | 4.6085  | 0.01    | -8.84815347  | 1.95E-38    | ** |
| siR_396820 | 4.0058  | 0.01    | -8.64594661  | 1.67E-33    | ** |
| siR_396842 | 1.0989  | 0.01    | -6.7799163   | 1.04E-09    | ** |
| siR_396868 | 3.8995  | 0.01    | -8.60714536  | 1.24E-32    | ** |
| siR_396872 | 1.028   | 0.01    | -6.68369645  | 3.95E-09    | ** |
| siR_396874 | 1.3471  | 0.01    | -7.07371314  | 9.66E-12    | ** |
| siR_3969   | 0.01    | 16.0737 | 10.65048635  | 2.75E-135   | ** |
| siR_396925 | 3.2614  | 0.01    | -8.34934759  | 2.07E-27    | ** |
| siR_396926 | 1.3471  | 0.01    | -7.07371314  | 9.66E-12    | ** |
| siR_396969 | 1.0635  | 0.01    | -6.73267622  | 2.02E-09    | ** |
| siR_396975 | 1.3471  | 0.01    | -7.07371314  | 9.66E-12    | ** |
| siR_396999 | 8.2953  | 0.01    | -9.69615036  | 1.30E-68    | ** |
| siR_3970   | 0.01    | 2.9462  | 8.20271156   | 2.12E-25    | ** |
| siR_397014 | 1.2053  | 0.01    | -6.91324847  | 1.40E-10    | ** |
| siR_39706  | 1.5598  | 1.0069  | -0.63144065  | 0.072523267 |    |
| siR_39710  | 0.01    | 1.3799  | 7.10841991   | 2.74E-12    | ** |
| siR_39713  | 0.01    | 19.9149 | 10.95963252  | 1.93E-167   | ** |
| siR_39717  | 0.01    | 2.7597  | 8.10836763   | 7.72E-24    | ** |
| siR_39723  | 0.01    | 2.2749  | 7.82965932   | 8.83E-20    | ** |
| siR_39728  | 0.01    | 1.0815  | 6.75688986   | 8.62E-10    | ** |
| siR_397292 | 1.5952  | 0.01    | -7.31759351  | 8.99E-14    | ** |
| siR_397303 | 2.2688  | 0.01    | -7.82578561  | 2.76E-19    | ** |
| siR_397375 | 3.3677  | 0.01    | -8.39561983  | 2.79E-28    | ** |



|            |         |         |              |             |    |
|------------|---------|---------|--------------|-------------|----|
| siR_397418 | 1.3825  | 0.01    | -7.11113566  | 4.95E-12    | ** |
| siR_397420 | 1.8788  | 0.01    | -7.55366769  | 4.29E-16    | ** |
| siR_397422 | 12.5847 | 0.01    | -10.29745508 | 1.01E-103   | ** |
| siR_397423 | 2.5878  | 0.01    | -8.0155823   | 6.75E-22    | ** |
| siR_397441 | 1.737   | 0.01    | -7.44045394  | 6.21E-15    | ** |
| siR_397444 | 2.3042  | 0.01    | -7.84812212  | 1.41E-19    | ** |
| siR_397449 | 4.1122  | 0.01    | -8.68376664  | 2.25E-34    | ** |
| siR_397461 | 25.0277 | 0.01    | -11.28930997 | 1.44E-205   | ** |
| siR_397464 | 3.1905  | 0.01    | -8.31763871  | 7.88E-27    | ** |
| siR_39747  | 0.01    | 1.1934  | 6.89893387   | 9.98E-11    | ** |
| siR_397504 | 5.4238  | 0.01    | -9.08316017  | 4.14E-45    | ** |
| siR_397542 | 1.2762  | 0.01    | -6.99571063  | 3.67E-11    | ** |
| siR_397550 | 13.1165 | 0.01    | -10.3571671  | 4.49E-108   | ** |
| siR_397558 | 5.4593  | 0.01    | -9.09257214  | 2.12E-45    | ** |
| siR_397564 | 46.9357 | 0.01    | -12.19647022 | 0           | ** |
| siR_397565 | 1.2053  | 0.01    | -6.91324847  | 1.40E-10    | ** |
| siR_39758  | 1.0635  | 0.2984  | -1.83350059  | 0.000528454 | ** |
| siR_397583 | 1.3471  | 0.01    | -7.07371314  | 9.66E-12    | ** |
| siR_397589 | 1.028   | 0.01    | -6.68369645  | 3.95E-09    | ** |
| siR_397592 | 5.3529  | 0.01    | -9.06417692  | 1.57E-44    | ** |
| siR_397616 | 5.8138  | 0.01    | -9.18333764  | 2.66E-48    | ** |
| siR_397627 | 1.028   | 0.01    | -6.68369645  | 3.95E-09    | ** |
| siR_39768  | 1.5598  | 0.5967  | -1.38628337  | 0.000554254 | ** |
| siR_397680 | 1.1344  | 0.01    | -6.82578563  | 5.32E-10    | ** |
| siR_3977   | 0.01    | 28.7163 | 11.48765416  | 4.07E-241   | ** |
| siR_397736 | 2.5524  | 0.01    | -7.99571063  | 1.32E-21    | ** |
| siR_397757 | 1.8079  | 0.01    | -7.49817107  | 1.63E-15    | ** |
| siR_3978   | 0.01    | 1.5663  | 7.29121675   | 7.54E-14    | ** |
| siR_397833 | 1.1698  | 0.01    | -6.87011809  | 2.73E-10    | ** |
| siR_397898 | 1.7016  | 0.01    | -7.41074813  | 1.21E-14    | ** |
| siR_397974 | 1.4889  | 0.01    | -7.21810305  | 6.67E-13    | ** |
| siR_39800  | 1.0989  | 0.1119  | -3.29577817  | 8.66E-07    | ** |
| siR_398002 | 1.3116  | 0.01    | -7.035184    | 1.88E-11    | ** |
| siR_39804  | 9.6778  | 7.3096  | -0.40488666  | 0.002606919 |    |
| siR_398058 | 3.4741  | 0.01    | -8.44049549  | 3.76E-29    | ** |
| siR_39807  | 20.2419 | 9.0624  | -1.15937964  | 7.43E-28    | ** |
| siR_398162 | 2.8714  | 0.01    | -8.16561052  | 3.22E-24    | ** |
| siR_398163 | 1.2053  | 0.01    | -6.91324847  | 1.40E-10    | ** |
| siR_398215 | 1.4889  | 0.01    | -7.21810305  | 6.67E-13    | ** |
| siR_398276 | 2.3751  | 0.01    | -7.89184446  | 3.72E-20    | ** |
| siR_39831  | 1.5243  | 1.4918  | -0.03109274  | 0.925089265 |    |
| siR_398406 | 1.3471  | 0.01    | -7.07371314  | 9.66E-12    | ** |
| siR_398453 | 1.5952  | 0.01    | -7.31759351  | 8.99E-14    | ** |
| siR_398475 | 1.7725  | 0.01    | -7.46964183  | 3.18E-15    | ** |
| siR_3985   | 0.01    | 17.5654 | 10.77852071  | 8.95E-148   | ** |
| siR_398549 | 2.446   | 0.01    | -7.93428061  | 9.77E-21    | ** |
| siR_398553 | 1.028   | 0.01    | -6.68369645  | 3.95E-09    | ** |

|            |          |        |              |           |    |
|------------|----------|--------|--------------|-----------|----|
| siR_398580 | 9.3588   | 0.01   | -9.87017969  | 2.56E-77  | ** |
| siR_39859  | 7.7635   | 3.5802 | -1.11666702  | 5.20E-11  | ** |
| siR_398674 | 3.1196   | 0.01   | -8.28521723  | 3.00E-26  | ** |
| siR_398675 | 1.1344   | 0.01   | -6.82578563  | 5.32E-10  | ** |
| siR_398718 | 1.7016   | 0.01   | -7.41074813  | 1.21E-14  | ** |
| siR_398722 | 335.9947 | 0.01   | -15.03614961 | 0         | ** |
| siR_398723 | 49.8426  | 0.01   | -12.28316353 | 0         | ** |
| siR_398724 | 30.9478  | 0.01   | -11.59562134 | 5.04E-254 | ** |
| siR_398725 | 26.9065  | 0.01   | -11.39373905 | 6.03E-221 | ** |
| siR_398726 | 21.3054  | 0.01   | -11.05700334 | 4.22E-175 | ** |
| siR_398727 | 7.1609   | 0.01   | -9.48399712  | 2.51E-59  | ** |
| siR_398728 | 4.7503   | 0.01   | -8.89187482  | 1.35E-39  | ** |
| siR_398729 | 2.6233   | 0.01   | -8.035239    | 3.46E-22  | ** |
| siR_398743 | 6.2746   | 0.01   | -9.29337967  | 4.50E-52  | ** |
| siR_398744 | 5.2111   | 0.01   | -9.02544416  | 2.28E-43  | ** |
| siR_398745 | 2.8005   | 0.01   | -8.12954063  | 1.23E-23  | ** |
| siR_398753 | 1.8079   | 0.01   | -7.49817107  | 1.63E-15  | ** |
| siR_39877  | 0.01     | 5.2957 | 9.04867759   | 4.56E-45  | ** |
| siR_398789 | 262.2942 | 0.01   | -14.67889935 | 0         | ** |
| siR_398790 | 2.4106   | 0.01   | -7.91324847  | 1.91E-20  | ** |
| siR_398791 | 1.3471   | 0.01   | -7.07371314  | 9.66E-12  | ** |
| siR_398799 | 1.1344   | 0.01   | -6.82578563  | 5.32E-10  | ** |
| siR_398816 | 1.418    | 0.01   | -7.14771372  | 2.54E-12  | ** |
| siR_398818 | 16.5551  | 0.01   | -10.69305993 | 3.21E-136 | ** |
| siR_398821 | 2.127    | 0.01   | -7.73267621  | 3.99E-18  | ** |
| siR_398824 | 16.7678  | 0.01   | -10.7114776  | 5.83E-138 | ** |
| siR_398902 | 10.8122  | 0.01   | -10.07844431 | 3.25E-89  | ** |
| siR_398906 | 3.864    | 0.01   | -8.59395129  | 2.42E-32  | ** |
| siR_398978 | 1.7725   | 0.01   | -7.46964183  | 3.18E-15  | ** |
| siR_399043 | 1.6307   | 0.01   | -7.34934759  | 4.61E-14  | ** |
| siR_399142 | 1.8788   | 0.01   | -7.55366769  | 4.29E-16  | ** |
| siR_399208 | 3.864    | 0.01   | -8.59395129  | 2.42E-32  | ** |
| siR_399210 | 16.6969  | 0.01   | -10.70536449 | 2.22E-137 | ** |
| siR_399250 | 6.1683   | 0.01   | -9.26872915  | 3.34E-51  | ** |
| siR_399279 | 2.3751   | 0.01   | -7.89184446  | 3.72E-20  | ** |
| siR_399288 | 3.4032   | 0.01   | -8.41074813  | 1.43E-28  | ** |
| siR_399293 | 2.6942   | 0.01   | -8.07371315  | 9.10E-23  | ** |
| siR_399404 | 27.5446  | 0.01   | -11.42755366 | 3.61E-226 | ** |
| siR_399405 | 7.9408   | 0.01   | -9.6331405   | 1.04E-65  | ** |
| siR_399406 | 2.0206   | 0.01   | -7.65863995  | 2.96E-17  | ** |
| siR_399407 | 1.9852   | 0.01   | -7.63314056  | 5.78E-17  | ** |
| siR_399437 | 1.2762   | 0.01   | -6.99571063  | 3.67E-11  | ** |
| siR_39946  | 1.2053   | 0.2611 | -2.20671792  | 3.06E-05  | ** |
| siR_399466 | 14.6763  | 0.01   | -10.51927268 | 7.68E-121 | ** |
| siR_399498 | 1.6307   | 0.01   | -7.34934759  | 4.61E-14  | ** |
| siR_399527 | 11.7694  | 0.01   | -10.20082503 | 4.77E-97  | ** |
| siR_399529 | 1.3825   | 0.01   | -7.1113566   | 4.95E-12  | ** |

|            |         |        |              |             |    |
|------------|---------|--------|--------------|-------------|----|
| siR_399550 | 3.6159  | 0.01   | -8.49821097  | 2.60E-30    | ** |
| siR_399661 | 1.6307  | 0.01   | -7.34934759  | 4.61E-14    | ** |
| siR_399677 | 27.3674 | 0.01   | -11.41824285 | 1.02E-224   | ** |
| siR_3997   | 2.7296  | 1.5663 | -0.80132899  | 0.003281986 |    |
| siR_39971  | 1.2762  | 1.2307 | -0.05237531  | 0.884419151 |    |
| siR_39972  | 1.8434  | 1.7528 | -0.07270777  | 0.805987837 |    |
| siR_39975  | 0.6026  | 1.3053 | 1.11510884   | 0.007429884 | ** |
| siR_399767 | 2.5524  | 0.01   | -7.99571063  | 1.32E-21    | ** |
| siR_399770 | 1.1698  | 0.01   | -6.87011809  | 2.73E-10    | ** |
| siR_39978  | 10.1741 | 1.1188 | -3.18487712  | 2.86E-51    | ** |
| siR_399797 | 1.6307  | 0.01   | -7.34934759  | 4.61E-14    | ** |
| siR_399834 | 1.9497  | 0.01   | -7.60710834  | 1.13E-16    | ** |
| siR_39989  | 2.2333  | 0.6713 | -1.73414751  | 1.06E-06    | ** |
| siR_399934 | 13.3646 | 0.01   | -10.38420088 | 4.18E-110   | ** |
| siR_399935 | 4.963   | 0.01   | -8.95506867  | 2.45E-41    | ** |
| siR_399942 | 1.2762  | 0.01   | -6.99571063  | 3.67E-11    | ** |
| siR_39996  | 3.1196  | 1.5663 | -0.99400049  | 0.000161818 |    |
| siR_39997  | 2.7296  | 1.1934 | -1.19361187  | 4.34E-05    | ** |
| siR_400009 | 2.1979  | 0.01   | -7.77998195  | 1.05E-18    | ** |
| siR_400037 | 1.1698  | 0.01   | -6.87011809  | 2.73E-10    | ** |
| siR_400119 | 18.5758 | 0.01   | -10.85920869 | 9.28E-153   | ** |
| siR_400120 | 2.446   | 0.01   | -7.93428061  | 9.77E-21    | ** |
| siR_400121 | 6.4164  | 0.01   | -9.3256203   | 3.11E-53    | ** |
| siR_400136 | 3.7222  | 0.01   | -8.54001177  | 3.50E-31    | ** |
| siR_400186 | 1.737   | 0.01   | -7.44045394  | 6.21E-15    | ** |
| siR_400200 | 3.1905  | 0.01   | -8.31763871  | 7.88E-27    | ** |
| siR_400249 | 1.4534  | 0.01   | -7.18328801  | 1.30E-12    | ** |
| siR_400255 | 2.3042  | 0.01   | -7.84812212  | 1.41E-19    | ** |
| siR_400264 | 2.2333  | 0.01   | -7.80303324  | 5.38E-19    | ** |
| siR_400267 | 1.418   | 0.01   | -7.14771372  | 2.54E-12    | ** |
| siR_400270 | 2.7296  | 0.01   | -8.09254576  | 4.66E-23    | ** |
| siR_400277 | 2.5524  | 0.01   | -7.99571063  | 1.32E-21    | ** |
| siR_400365 | 5.8138  | 0.01   | -9.18333764  | 2.66E-48    | ** |
| siR_400376 | 1.028   | 0.01   | -6.68369645  | 3.95E-09    | ** |
| siR_400403 | 1.8788  | 0.01   | -7.55366769  | 4.29E-16    | ** |
| siR_400460 | 1.5598  | 0.01   | -7.28521726  | 1.75E-13    | ** |
| siR_400499 | 1.8434  | 0.01   | -7.52622535  | 8.37E-16    | ** |
| siR_40058  | 2.3397  | 0.9323 | -1.32745738  | 4.00E-05    | ** |
| siR_400611 | 1.2053  | 0.01   | -6.91324847  | 1.40E-10    | ** |
| siR_400618 | 2.836   | 0.01   | -8.14771372  | 6.28E-24    | ** |
| siR_400700 | 1.2053  | 0.01   | -6.91324847  | 1.40E-10    | ** |
| siR_400709 | 2.9778  | 0.01   | -8.21810305  | 4.34E-25    | ** |
| siR_400713 | 4.9984  | 0.01   | -8.96532255  | 1.25E-41    | ** |
| siR_400732 | 10.7413 | 0.01   | -10.06895291 | 1.24E-88    | ** |
| siR_400771 | 3.864   | 0.01   | -8.59395129  | 2.42E-32    | ** |
| siR_400817 | 1.0635  | 0.01   | -6.73267622  | 2.02E-09    | ** |
| siR_400875 | 6.7355  | 0.01   | -9.39564121  | 7.60E-56    | ** |

|            |         |        |              |             |    |
|------------|---------|--------|--------------|-------------|----|
| siR_400877 | 5.0339  | 0.01   | -8.97553276  | 6.43E-42    | ** |
| siR_401013 | 1.3825  | 0.01   | -7.11113566  | 4.95E-12    | ** |
| siR_401021 | 1.9143  | 0.01   | -7.58067313  | 2.20E-16    | ** |
| siR_401031 | 2.9778  | 0.01   | -8.21810305  | 4.34E-25    | ** |
| siR_401043 | 2.0915  | 0.01   | -7.70839418  | 7.79E-18    | ** |
| siR_401045 | 4.3603  | 0.01   | -8.76828358  | 2.10E-36    | ** |
| siR_401071 | 1.0989  | 0.01   | -6.7799163   | 1.04E-09    | ** |
| siR_401078 | 1.2407  | 0.01   | -6.95501051  | 7.17E-11    | ** |
| siR_401095 | 43.9579 | 0.01   | -12.10190671 | 0           | ** |
| siR_40113  | 0.01    | 1.1188 | 6.80580835   | 4.20E-10    | ** |
| siR_401142 | 1.6307  | 0.01   | -7.34934759  | 4.61E-14    | ** |
| siR_401151 | 2.9069  | 0.01   | -8.18333764  | 1.65E-24    | ** |
| siR_401161 | 19.462  | 0.01   | -10.92644428 | 5.17E-160   | ** |
| siR_401162 | 2.1979  | 0.01   | -7.77998195  | 1.05E-18    | ** |
| siR_401219 | 3.155   | 0.01   | -8.3014962   | 1.54E-26    | ** |
| siR_401220 | 12.8329 | 0.01   | -10.3256315  | 9.41E-106   | ** |
| siR_401251 | 1.5952  | 0.01   | -7.31759351  | 8.99E-14    | ** |
| siR_401268 | 1.5598  | 0.01   | -7.28521726  | 1.75E-13    | ** |
| siR_401278 | 25.843  | 0.01   | -11.33555776 | 3.06E-212   | ** |
| siR_401279 | 3.4386  | 0.01   | -8.42567749  | 7.34E-29    | ** |
| siR_401285 | 5.4238  | 0.01   | -9.08316017  | 4.14E-45    | ** |
| siR_401338 | 2.6942  | 0.01   | -8.07371315  | 9.10E-23    | ** |
| siR_401351 | 10.5286 | 0.01   | -10.04009789 | 6.82E-87    | ** |
| siR_401410 | 1.6661  | 0.01   | -7.38033118  | 2.36E-14    | ** |
| siR_401440 | 1.2053  | 0.01   | -6.91324847  | 1.40E-10    | ** |
| siR_401464 | 1.1344  | 0.01   | -6.82578563  | 5.32E-10    | ** |
| siR_40150  | 1.0989  | 0.3356 | -1.71124549  | 0.000775199 | ** |
| siR_401544 | 4.2894  | 0.01   | -8.74463204  | 7.97E-36    | ** |
| siR_401545 | 2.9423  | 0.01   | -8.20080054  | 8.47E-25    | ** |
| siR_40155  | 1.3471  | 1.6036 | 0.25145737   | 0.434220389 |    |
| siR_40156  | 1.5598  | 1.2307 | -0.34188193  | 0.306763052 |    |
| siR_401566 | 5.9556  | 0.01   | -9.21810309  | 1.84E-49    | ** |
| siR_401590 | 1.6661  | 0.01   | -7.38033118  | 2.36E-14    | ** |
| siR_401605 | 1.1344  | 0.01   | -6.82578563  | 5.32E-10    | ** |
| siR_401617 | 6.7     | 0.01   | -9.3880173   | 1.48E-55    | ** |
| siR_401632 | 1.6307  | 0.01   | -7.34934759  | 4.61E-14    | ** |
| siR_401637 | 1.2407  | 0.01   | -6.95501051  | 7.17E-11    | ** |
| siR_401643 | 2.5878  | 0.01   | -8.0155823   | 6.75E-22    | ** |
| siR_401659 | 2.3042  | 0.01   | -7.84812212  | 1.41E-19    | ** |
| siR_40166  | 1.0989  | 0.3729 | -1.5591994   | 0.001653799 | ** |
| siR_4017   | 1.7016  | 0.6713 | -1.34186239  | 0.000428491 | ** |
| siR_401711 | 2.127   | 0.01   | -7.73267621  | 3.99E-18    | ** |
| siR_401729 | 1.9852  | 0.01   | -7.63314056  | 5.78E-17    | ** |
| siR_401761 | 6.0974  | 0.01   | -9.25205038  | 1.27E-50    | ** |
| siR_401794 | 2.836   | 0.01   | -8.14771372  | 6.28E-24    | ** |
| siR_401820 | 2.5169  | 0.01   | -7.97550407  | 2.57E-21    | ** |
| siR_401829 | 2.8005  | 0.01   | -8.12954063  | 1.23E-23    | ** |

|            |          |         |              |             |    |
|------------|----------|---------|--------------|-------------|----|
| siR_401902 | 16.0588  | 0.01    | -10.64914846 | 3.71E-132   | ** |
| siR_401920 | 3.3323   | 0.01    | -8.38037447  | 5.44E-28    | ** |
| siR_4021   | 3.3677   | 0.7832  | -2.10431096  | 7.84E-12    | ** |
| siR_402192 | 1.7016   | 0.01    | -7.41074813  | 1.21E-14    | ** |
| siR_402239 | 19.7811  | 0.01    | -10.94990682 | 1.27E-162   | ** |
| siR_402240 | 3.4032   | 0.01    | -8.41074813  | 1.43E-28    | ** |
| siR_402244 | 181.2556 | 0.01    | -14.14573819 | 0           | ** |
| siR_402245 | 2.1979   | 0.01    | -7.77998195  | 1.05E-18    | ** |
| siR_402289 | 3.0841   | 0.01    | -8.26870574  | 5.85E-26    | ** |
| siR_402293 | 19.852   | 0.01    | -10.9550686  | 3.33E-163   | ** |
| siR_402399 | 1.3471   | 0.01    | -7.07371314  | 9.66E-12    | ** |
| siR_402413 | 2.0915   | 0.01    | -7.70839418  | 7.79E-18    | ** |
| siR_402431 | 2.7651   | 0.01    | -8.11118786  | 2.39E-23    | ** |
| siR_402452 | 1.0635   | 0.01    | -6.73267622  | 2.02E-09    | ** |
| siR_402640 | 1.9852   | 0.01    | -7.63314056  | 5.78E-17    | ** |
| siR_40265  | 4.4312   | 1.902   | -1.2201802   | 1.07E-07    | ** |
| siR_402672 | 3.9704   | 0.01    | -8.63314056  | 3.26E-33    | ** |
| siR_402690 | 10.3514  | 0.01    | -10.01561019 | 1.93E-85    | ** |
| siR_40270  | 0.01     | 1.6782  | 7.39077085   | 8.72E-15    | ** |
| siR_402804 | 1.1344   | 0.01    | -6.82578563  | 5.32E-10    | ** |
| siR_402809 | 1.7016   | 0.01    | -7.41074813  | 1.21E-14    | ** |
| siR_402843 | 1.0635   | 0.01    | -6.73267622  | 2.02E-09    | ** |
| siR_402898 | 1.0989   | 0.01    | -6.7799163   | 1.04E-09    | ** |
| siR_40296  | 1.7016   | 0.8205  | -1.0523167   | 0.003656954 | ** |
| siR_403001 | 1.3116   | 0.01    | -7.035184    | 1.88E-11    | ** |
| siR_403078 | 3.4386   | 0.01    | -8.42567749  | 7.34E-29    | ** |
| siR_403125 | 4.7148   | 0.01    | -8.88105279  | 2.63E-39    | ** |
| siR_403147 | 3.5095   | 0.01    | -8.45512172  | 1.93E-29    | ** |
| siR_403158 | 3.1905   | 0.01    | -8.31763871  | 7.88E-27    | ** |
| siR_403171 | 7.3381   | 0.01    | -9.51926273  | 8.87E-61    | ** |
| siR_40320  | 19.7811  | 11.5238 | -0.77950613  | 7.91E-15    |    |
| siR_403377 | 2.446    | 0.01    | -7.93428061  | 9.77E-21    | ** |
| siR_403487 | 4.963    | 0.01    | -8.95506867  | 2.45E-41    | ** |
| siR_4035   | 8.0471   | 7.1231  | -0.17596372  | 0.214750591 |    |
| siR_403510 | 4.6794   | 0.01    | -8.87017976  | 5.13E-39    | ** |
| siR_403525 | 5.3175   | 0.01    | -9.0546043   | 3.07E-44    | ** |
| siR_403558 | 10.3159  | 0.01    | -10.01065393 | 3.76E-85    | ** |
| siR_403572 | 1.6307   | 0.01    | -7.34934759  | 4.61E-14    | ** |
| siR_403579 | 5.8138   | 0.01    | -9.18333764  | 2.66E-48    | ** |
| siR_403600 | 2.1979   | 0.01    | -7.77998195  | 1.05E-18    | ** |
| siR_403678 | 1.7725   | 0.01    | -7.46964183  | 3.18E-15    | ** |
| siR_403855 | 1.2053   | 0.01    | -6.91324847  | 1.40E-10    | ** |
| siR_403883 | 1.4534   | 0.01    | -7.18328801  | 1.30E-12    | ** |
| siR_403892 | 3.2614   | 0.01    | -8.34934759  | 2.07E-27    | ** |
| siR_403894 | 1.2407   | 0.01    | -6.95501051  | 7.17E-11    | ** |
| siR_403908 | 3.4386   | 0.01    | -8.42567749  | 7.34E-29    | ** |
| siR_403912 | 30.1325  | 0.01    | -11.55710459 | 2.38E-247   | ** |

|            |          |        |              |             |    |
|------------|----------|--------|--------------|-------------|----|
| siR_403971 | 3.2968   | 0.01   | -8.36492254  | 1.06E-27    | ** |
| siR_40400  | 2.9778   | 0.9696 | -1.61878526  | 7.47E-08    | ** |
| siR_404002 | 1.2407   | 0.01   | -6.95501051  | 7.17E-11    | ** |
| siR_404053 | 1.0635   | 0.01   | -6.73267622  | 2.02E-09    | ** |
| siR_404056 | 2.2333   | 0.01   | -7.80303324  | 5.38E-19    | ** |
| siR_404173 | 2.5878   | 0.01   | -8.0155823   | 6.75E-22    | ** |
| siR_404183 | 2.0561   | 0.01   | -7.68376661  | 1.52E-17    | ** |
| siR_404194 | 1.2407   | 0.01   | -6.95501051  | 7.17E-11    | ** |
| siR_404235 | 2.836    | 0.01   | -8.14771372  | 6.28E-24    | ** |
| siR_40432  | 0.01     | 6.1535 | 9.26526341   | 3.01E-52    | ** |
| siR_4044   | 2.9069   | 3.8786 | 0.41605456   | 0.050374117 |    |
| siR_404430 | 1.4534   | 0.01   | -7.18328801  | 1.30E-12    | ** |
| siR_404435 | 1.4889   | 0.01   | -7.21810305  | 6.67E-13    | ** |
| siR_404478 | 2.3751   | 0.01   | -7.89184446  | 3.72E-20    | ** |
| siR_404573 | 1.4534   | 0.01   | -7.18328801  | 1.30E-12    | ** |
| siR_404663 | 12.4784  | 0.01   | -10.28521723 | 7.50E-103   | ** |
| siR_404671 | 1.5598   | 0.01   | -7.28521726  | 1.75E-13    | ** |
| siR_404696 | 4.9984   | 0.01   | -8.96532255  | 1.25E-41    | ** |
| siR_40483  | 1.4534   | 0.4102 | -1.82503241  | 4.93E-05    | ** |
| siR_404875 | 1.3825   | 0.01   | -7.11113566  | 4.95E-12    | ** |
| siR_404956 | 1.1698   | 0.01   | -6.87011809  | 2.73E-10    | ** |
| siR_40507  | 2.836    | 2.3495 | -0.27150376  | 0.265637383 |    |
| siR_405073 | 3.3677   | 0.01   | -8.39561983  | 2.79E-28    | ** |
| siR_405078 | 13.4355  | 0.01   | -10.39183435 | 1.10E-110   | ** |
| siR_405093 | 1.0635   | 0.01   | -6.73267622  | 2.02E-09    | ** |
| siR_405110 | 3.8995   | 0.01   | -8.60714536  | 1.24E-32    | ** |
| siR_405159 | 2.836    | 0.01   | -8.14771372  | 6.28E-24    | ** |
| siR_40516  | 2.3397   | 1.4918 | -0.64926943  | 0.023652695 |    |
| siR_405160 | 1.7016   | 0.01   | -7.41074813  | 1.21E-14    | ** |
| siR_405201 | 1.028    | 0.01   | -6.68369645  | 3.95E-09    | ** |
| siR_405216 | 1.7725   | 0.01   | -7.46964183  | 3.18E-15    | ** |
| siR_405287 | 9.9614   | 0.01   | -9.96020464  | 2.99E-82    | ** |
| siR_405312 | 1.5952   | 0.01   | -7.31759351  | 8.99E-14    | ** |
| siR_405354 | 4.5021   | 0.01   | -8.81445427  | 1.45E-37    | ** |
| siR_405363 | 5.7429   | 0.01   | -9.16563566  | 1.01E-47    | ** |
| siR_40539  | 0.01     | 1.529  | 7.2564446    | 1.55E-13    | ** |
| siR_40547  | 5.4238   | 3.431  | -0.66067485  | 0.000443915 |    |
| siR_40560  | 5.672    | 4.9601 | -0.19348833  | 0.254013424 |    |
| siR_40563  | 2.0915   | 0.8578 | -1.28582478  | 0.000152961 | ** |
| siR_40566  | 3.6159   | 2.3122 | -0.64508859  | 0.005053452 |    |
| siR_40568  | 0.5317   | 1.529  | 1.52390404   | 0.000222537 | ** |
| siR_405806 | 12.053   | 0.01   | -10.2351765  | 2.27E-99    | ** |
| siR_405854 | 1.0989   | 0.01   | -6.7799163   | 1.04E-09    | ** |
| siR_405868 | 4.3249   | 0.01   | -8.75652296  | 4.09E-36    | ** |
| siR_405920 | 39.8457  | 0.01   | -11.96020838 | 0           | ** |
| siR_405923 | 283.8478 | 0.01   | -14.7928319  | 0           | ** |
| siR_405924 | 1.0635   | 0.01   | -6.73267622  | 2.02E-09    | ** |

|            |          |          |               |              |    |
|------------|----------|----------|---------------|--------------|----|
| siR_405992 | 1. 5952  | 0. 01    | -7. 31759351  | 8. 99E-14    | ** |
| siR_4060   | 0. 01    | 1. 3426  | 7. 06888574   | 5. 63E-12    | ** |
| siR_406005 | 16. 8387 | 0. 01    | -10. 71756498 | 1. 53E-138   | ** |
| siR_406008 | 2. 9069  | 0. 01    | -8. 18333764  | 1. 65E-24    | ** |
| siR_406083 | 1. 9852  | 0. 01    | -7. 63314056  | 5. 78E-17    | ** |
| siR_406093 | 2. 1979  | 0. 01    | -7. 77998195  | 1. 05E-18    | ** |
| siR_406123 | 3. 864   | 0. 01    | -8. 59395129  | 2. 42E-32    | ** |
| siR_406161 | 1. 9497  | 0. 01    | -7. 60710834  | 1. 13E-16    | ** |
| siR_406184 | 5. 9201  | 0. 01    | -9. 2094777   | 3. 58E-49    | ** |
| siR_406185 | 3. 0841  | 0. 01    | -8. 26870574  | 5. 85E-26    | ** |
| siR_406193 | 1. 3825  | 0. 01    | -7. 11113566  | 4. 95E-12    | ** |
| siR_40625  | 2. 836   | 2. 8716  | 0. 01799727   | 0. 935755409 |    |
| siR_40626  | 0. 01    | 12. 1951 | 10. 25208587  | 8. 05E-103   | ** |
| siR_406269 | 2. 7296  | 0. 01    | -8. 09254576  | 4. 66E-23    | ** |
| siR_406305 | 1. 3825  | 0. 01    | -7. 11113566  | 4. 95E-12    | ** |
| siR_406377 | 1. 0635  | 0. 01    | -6. 73267622  | 2. 02E-09    | ** |
| siR_406400 | 8. 2244  | 0. 01    | -9. 68376659  | 4. 94E-68    | ** |
| siR_40641  | 2. 8714  | 1. 529   | -0. 90916591  | 0. 000784513 |    |
| siR_406455 | 1. 3116  | 0. 01    | -7. 035184    | 1. 88E-11    | ** |
| siR_406459 | 7. 3381  | 0. 01    | -9. 51926273  | 8. 87E-61    | ** |
| siR_406486 | 68. 6666 | 0. 01    | -12. 74539291 | 0            | ** |
| siR_406487 | 1. 5243  | 0. 01    | -7. 25200305  | 3. 42E-13    | ** |
| siR_406503 | 2. 0206  | 0. 01    | -7. 65863995  | 2. 96E-17    | ** |
| siR_406526 | 1. 2053  | 0. 01    | -6. 91324847  | 1. 40E-10    | ** |
| siR_406572 | 1. 7725  | 0. 01    | -7. 46964183  | 3. 18E-15    | ** |
| siR_406579 | 81. 5703 | 0. 01    | -12. 99382871 | 0            | ** |
| siR_406580 | 1. 7725  | 0. 01    | -7. 46964183  | 3. 18E-15    | ** |
| siR_406622 | 3. 1196  | 0. 01    | -8. 28521723  | 3. 00E-26    | ** |
| siR_40663  | 0. 01    | 1. 1188  | 6. 80580835   | 4. 20E-10    | ** |
| siR_406631 | 1. 0989  | 0. 01    | -6. 7799163   | 1. 04E-09    | ** |
| siR_406654 | 1. 3471  | 0. 01    | -7. 07371314  | 9. 66E-12    | ** |
| siR_40667  | 0. 01    | 2. 163   | 7. 75688986   | 7. 63E-19    | ** |
| siR_406675 | 2. 3397  | 0. 01    | -7. 87017976  | 7. 25E-20    | ** |
| siR_40671  | 0. 01    | 2. 5733  | 8. 00747585   | 2. 81E-22    | ** |
| siR_406724 | 17. 1578 | 0. 01    | -10. 74464887 | 3. 75E-141   | ** |
| siR_406726 | 1. 1344  | 0. 01    | -6. 82578563  | 5. 32E-10    | ** |
| siR_406741 | 2. 3042  | 0. 01    | -7. 84812212  | 1. 41E-19    | ** |
| siR_406755 | 1. 0989  | 0. 01    | -6. 7799163   | 1. 04E-09    | ** |
| siR_406763 | 1. 0635  | 0. 01    | -6. 73267622  | 2. 02E-09    | ** |
| siR_406766 | 6. 6291  | 0. 01    | -9. 37266921  | 5. 64E-55    | ** |
| siR_40683  | 3. 1196  | 1. 1561  | -1. 43209486  | 4. 81E-07    | ** |
| siR_406832 | 1. 8788  | 0. 01    | -7. 55366769  | 4. 29E-16    | ** |
| siR_406836 | 1. 1344  | 0. 01    | -6. 82578563  | 5. 32E-10    | ** |
| siR_406935 | 9. 3588  | 0. 01    | -9. 87017969  | 2. 56E-77    | ** |
| siR_406944 | 1. 1698  | 0. 01    | -6. 87011809  | 2. 73E-10    | ** |
| siR_406959 | 3. 2259  | 0. 01    | -8. 33355791  | 4. 04E-27    | ** |
| siR_406964 | 218. 549 | 0. 01    | -14. 41567008 | 0            | ** |

|            |           |         |              |             |    |
|------------|-----------|---------|--------------|-------------|----|
| siR_406965 | 5.4947    | 0.01    | -9.10189688  | 1.09E-45    | ** |
| siR_406977 | 10.6704   | 0.01    | -10.05939853 | 4.71E-88    | ** |
| siR_406994 | 11.9821   | 0.01    | -10.22666514 | 8.65E-99    | ** |
| siR_406997 | 1.1698    | 0.01    | -6.87011809  | 2.73E-10    | ** |
| siR_407046 | 1.3116    | 0.01    | -7.035184    | 1.88E-11    | ** |
| siR_40706  | 1.6661    | 0.2611  | -2.67380063  | 3.67E-08    | ** |
| siR_407087 | 2.1979    | 0.01    | -7.77998195  | 1.05E-18    | ** |
| siR_407113 | 1.8434    | 0.01    | -7.52622535  | 8.37E-16    | ** |
| siR_407128 | 3.1196    | 0.01    | -8.28521723  | 3.00E-26    | ** |
| siR_407149 | 1.028     | 0.01    | -6.68369645  | 3.95E-09    | ** |
| siR_407174 | 21.6599   | 0.01    | -11.08081102 | 5.30E-178   | ** |
| siR_407190 | 68.9856   | 0.01    | -12.75207941 | 0           | ** |
| siR_407196 | 2.1979    | 0.01    | -7.77998195  | 1.05E-18    | ** |
| siR_407210 | 1.9497    | 0.01    | -7.60710834  | 1.13E-16    | ** |
| siR_40722  | 1.7725    | 3.17    | 0.83869721   | 0.000929601 |    |
| siR_407222 | 2.3751    | 0.01    | -7.89184446  | 3.72E-20    | ** |
| siR_407248 | 1.0635    | 0.01    | -6.73267622  | 2.02E-09    | ** |
| siR_407264 | 26.9774   | 0.01    | -11.39753577 | 1.59E-221   | ** |
| siR_40728  | 0.01      | 1.2307  | 6.94333532   | 4.86E-11    | ** |
| siR_407296 | 4.6439    | 0.01    | -8.85919308  | 1.00E-38    | ** |
| siR_4073   | 38.9949   | 16.8195 | -1.21315063  | 7.20E-56    | ** |
| siR_407306 | 5.2466    | 0.01    | -9.03523897  | 1.17E-43    | ** |
| siR_407320 | 3.1196    | 0.01    | -8.28521723  | 3.00E-26    | ** |
| siR_407322 | 1.8434    | 0.01    | -7.52622535  | 8.37E-16    | ** |
| siR_40744  | 1.028     | 0.4848  | -1.08437866  | 0.021479092 | *  |
| siR_40746  | 3.9704    | 1.3053  | -1.60490294  | 6.27E-10    | ** |
| siR_40747  | 1.9852    | 0.8578  | -1.21057114  | 0.000435901 | ** |
| siR_407474 | 9.1106    | 0.01    | -9.83140232  | 2.75E-75    | ** |
| siR_407484 | 5.2111    | 0.01    | -9.02544416  | 2.28E-43    | ** |
| siR_407541 | 4.4667    | 0.01    | -8.80306553  | 2.82E-37    | ** |
| siR_407554 | 2.8005    | 0.01    | -8.12954063  | 1.23E-23    | ** |
| siR_407556 | 27.2965   | 0.01    | -11.4145004  | 3.88E-224   | ** |
| siR_407561 | 3.7222    | 0.01    | -8.54001177  | 3.50E-31    | ** |
| siR_407609 | 3.7931    | 0.01    | -8.56723361  | 9.20E-32    | ** |
| siR_407654 | 1684.9009 | 0.01    | -17.36229623 | 0           | ** |
| siR_407655 | 47.7156   | 0.01    | -12.22024506 | 0           | ** |
| siR_407662 | 16.5197   | 0.01    | -10.6899717  | 6.26E-136   | ** |
| siR_407663 | 3.3323    | 0.01    | -8.38037447  | 5.44E-28    | ** |
| siR_407684 | 7.3381    | 0.01    | -9.51926273  | 8.87E-61    | ** |
| siR_407767 | 1.3825    | 0.01    | -7.11113566  | 4.95E-12    | ** |
| siR_407813 | 1.2762    | 0.01    | -6.99571063  | 3.67E-11    | ** |
| siR_407822 | 1.9143    | 0.01    | -7.58067313  | 2.20E-16    | ** |
| siR_408028 | 17.8668   | 0.01    | -10.80306559 | 5.90E-147   | ** |
| siR_40808  | 95.0059   | 26.1057 | -1.86365227  | 1.25E-249   | ** |
| siR_408133 | 1.0989    | 0.01    | -6.7799163   | 1.04E-09    | ** |
| siR_408137 | 5.7783    | 0.01    | -9.17450131  | 5.19E-48    | ** |
| siR_40828  | 4.573     | 0.9696  | -2.23767932  | 1.05E-16    | ** |



|            |          |         |               |              |    |
|------------|----------|---------|---------------|--------------|----|
| siR_408295 | 1. 5598  | 0. 01   | -7. 28521726  | 1. 75E-13    | ** |
| siR_408335 | 2. 0915  | 0. 01   | -7. 70839418  | 7. 79E-18    | ** |
| siR_408372 | 1. 028   | 0. 01   | -6. 68369645  | 3. 95E-09    | ** |
| siR_408378 | 1. 3825  | 0. 01   | -7. 11113566  | 4. 95E-12    | ** |
| siR_408395 | 1. 028   | 0. 01   | -6. 68369645  | 3. 95E-09    | ** |
| siR_40840  | 4. 6439  | 3. 0954 | -0. 58521105  | 0. 003548931 |    |
| siR_408420 | 8. 3307  | 0. 01   | -9. 70229394  | 6. 66E-69    | ** |
| siR_408443 | 1. 1344  | 0. 01   | -6. 82578563  | 5. 32E-10    | ** |
| siR_408460 | 4. 0058  | 0. 01   | -8. 64594661  | 1. 67E-33    | ** |
| siR_40847  | 13. 5419 | 3. 6921 | -1. 87491664  | 2. 24E-37    | ** |
| siR_40848  | 4. 1122  | 1. 1188 | -1. 87795827  | 2. 16E-12    | ** |
| siR_408480 | 4. 3603  | 0. 01   | -8. 76828358  | 2. 10E-36    | ** |
| siR_408481 | 1. 0635  | 0. 01   | -6. 73267622  | 2. 02E-09    | ** |
| siR_40849  | 2. 2688  | 0. 634  | -1. 83937469  | 3. 00E-07    | ** |
| siR_40851  | 1. 5952  | 0. 2238 | -2. 83345537  | 2. 82E-08    | ** |
| siR_408532 | 8. 3307  | 0. 01   | -9. 70229394  | 6. 66E-69    | ** |
| siR_408557 | 1. 0989  | 0. 01   | -6. 7799163   | 1. 04E-09    | ** |
| siR_408564 | 3. 7931  | 0. 01   | -8. 56723361  | 9. 20E-32    | ** |
| siR_408568 | 1. 4534  | 0. 01   | -7. 18328801  | 1. 30E-12    | ** |
| siR_408616 | 7. 9053  | 0. 01   | -9. 62667644  | 2. 02E-65    | ** |
| siR_40864  | 8. 0826  | 1. 6036 | -2. 33350513  | 8. 08E-30    | ** |
| siR_40865  | 1. 0989  | 0. 5967 | -0. 88098242  | 0. 045030158 |    |
| siR_408652 | 2. 127   | 0. 01   | -7. 73267621  | 3. 99E-18    | ** |
| siR_40866  | 1. 028   | 0. 3356 | -1. 61502564  | 0. 001825058 | ** |
| siR_40867  | 1. 2053  | 0. 2611 | -2. 20671792  | 3. 06E-05    | ** |
| siR_408709 | 2. 7296  | 0. 01   | -8. 09254576  | 4. 66E-23    | ** |
| siR_408722 | 3. 9349  | 0. 01   | -8. 62018319  | 6. 36E-33    | ** |
| siR_408735 | 1. 4889  | 0. 01   | -7. 21810305  | 6. 67E-13    | ** |
| siR_408737 | 1. 2053  | 0. 01   | -6. 91324847  | 1. 40E-10    | ** |
| siR_408739 | 64. 3771 | 0. 01   | -12. 65233223 | 0            | ** |
| siR_408764 | 1. 3471  | 0. 01   | -7. 07371314  | 9. 66E-12    | ** |
| siR_408777 | 1. 418   | 0. 01   | -7. 14771372  | 2. 54E-12    | ** |
| siR_40881  | 1. 1698  | 0. 2611 | -2. 16358753  | 5. 01E-05    | ** |
| siR_408846 | 1. 1698  | 0. 01   | -6. 87011809  | 2. 73E-10    | ** |
| siR_408858 | 3. 3323  | 0. 01   | -8. 38037447  | 5. 44E-28    | ** |
| siR_408861 | 21. 4118 | 0. 01   | -11. 06419036 | 5. 69E-176   | ** |
| siR_408862 | 1. 9852  | 0. 01   | -7. 63314056  | 5. 78E-17    | ** |
| siR_408872 | 59. 9459 | 0. 01   | -12. 5494452  | 0            | ** |
| siR_408873 | 1. 737   | 0. 01   | -7. 44045394  | 6. 21E-15    | ** |
| siR_408882 | 7. 3381  | 0. 01   | -9. 51926273  | 8. 87E-61    | ** |
| siR_40894  | 7. 0191  | 1. 7901 | -1. 97124588  | 2. 14E-21    | ** |
| siR_40895  | 1. 7016  | 0. 8205 | -1. 0523167   | 0. 003656954 | ** |
| siR_40896  | 1. 0635  | 0. 3729 | -1. 51195933  | 0. 00248896  | ** |
| siR_408962 | 2. 2333  | 0. 01   | -7. 80303324  | 5. 38E-19    | ** |
| siR_40897  | 1. 3471  | 0. 2611 | -2. 36718259  | 4. 10E-06    | ** |
| siR_408982 | 20. 4546 | 0. 01   | -10. 99820957 | 3. 88E-168   | ** |
| siR_409032 | 3. 1905  | 0. 01   | -8. 31763871  | 7. 88E-27    | ** |

|            |         |         |              |             |    |
|------------|---------|---------|--------------|-------------|----|
| siR_409036 | 3.1196  | 0.01    | -8.28521723  | 3.00E-26    | ** |
| siR_40904  | 1.0989  | 0.2984  | -1.88074067  | 0.000335467 | ** |
| siR_409044 | 1.3116  | 0.01    | -7.035184    | 1.88E-11    | ** |
| siR_409137 | 7.09    | 0.01    | -9.46964185  | 9.53E-59    | ** |
| siR_409149 | 2.1979  | 0.01    | -7.77998195  | 1.05E-18    | ** |
| siR_40915  | 1.0635  | 0.4102  | -1.37442064  | 0.004842593 | ** |
| siR_409155 | 1.2053  | 0.01    | -6.91324847  | 1.40E-10    | ** |
| siR_409162 | 1.737   | 0.01    | -7.44045394  | 6.21E-15    | ** |
| siR_409165 | 4.3958  | 0.01    | -8.77998192  | 1.07E-36    | ** |
| siR_409167 | 7.09    | 0.01    | -9.46964185  | 9.53E-59    | ** |
| siR_409182 | 1.3825  | 0.01    | -7.11113566  | 4.95E-12    | ** |
| siR_409220 | 1.0635  | 0.01    | -6.73267622  | 2.02E-09    | ** |
| siR_409261 | 3.6868  | 0.01    | -8.52622535  | 6.83E-31    | ** |
| siR_409263 | 1.028   | 0.01    | -6.68369645  | 3.95E-09    | ** |
| siR_409302 | 5.0693  | 0.01    | -8.98564277  | 3.30E-42    | ** |
| siR_40938  | 0.01    | 5.3703  | 9.06885887   | 1.08E-45    | ** |
| siR_409392 | 1.1698  | 0.01    | -6.87011809  | 2.73E-10    | ** |
| siR_409393 | 4.8566  | 0.01    | -8.92380283  | 1.82E-40    | ** |
| siR_4094   | 18.0795 | 13.8733 | -0.38204378  | 9.56E-05    |    |
| siR_409411 | 5.5656  | 0.01    | -9.12039339  | 2.86E-46    | ** |
| siR_40947  | 2.9069  | 0.5967  | -2.28440376  | 2.35E-11    | ** |
| siR_409538 | 3.1905  | 0.01    | -8.31763871  | 7.88E-27    | ** |
| siR_409571 | 2.9778  | 0.01    | -8.21810305  | 4.34E-25    | ** |
| siR_409582 | 3.8995  | 0.01    | -8.60714536  | 1.24E-32    | ** |
| siR_409597 | 10.4577 | 0.01    | -10.03034988 | 2.59E-86    | ** |
| siR_409630 | 2.6233  | 0.01    | -8.035239    | 3.46E-22    | ** |
| siR_40969  | 15.6334 | 5.2584  | -1.57193578  | 7.31E-34    | ** |
| siR_409690 | 17.5477 | 0.01    | -10.77706612 | 2.41E-144   | ** |
| siR_40971  | 1.2053  | 0.1865  | -2.69214474  | 2.94E-06    | ** |
| siR_409747 | 2.3042  | 0.01    | -7.84812212  | 1.41E-19    | ** |
| siR_40977  | 2.446   | 1.1934  | -1.03534672  | 0.000562574 | ** |
| siR_409874 | 1.9143  | 0.01    | -7.58067313  | 2.20E-16    | ** |
| siR_40989  | 5.7429  | 2.2749  | -1.33597631  | 8.21E-11    | ** |
| siR_40991  | 4.7148  | 1.9766  | -1.25417563  | 2.12E-08    | ** |
| siR_40993  | 10.4577 | 5.333   | -0.97154636  | 1.02E-11    |    |
| siR_409940 | 1.3116  | 0.01    | -7.035184    | 1.88E-11    | ** |
| siR_40995  | 0.01    | 3.3937  | 8.40671523   | 3.81E-29    | ** |
| siR_409963 | 2.446   | 0.01    | -7.93428061  | 9.77E-21    | ** |
| siR_409968 | 3.1905  | 0.01    | -8.31763871  | 7.88E-27    | ** |
| siR_41001  | 1.028   | 0.2238  | -2.19955832  | 0.000127871 | ** |
| siR_410058 | 1.5598  | 0.01    | -7.28521726  | 1.75E-13    | ** |
| siR_410074 | 1.9143  | 0.01    | -7.58067313  | 2.20E-16    | ** |
| siR_410076 | 42.5399 | 0.01    | -12.05460108 | 0           | ** |
| siR_410079 | 9.3942  | 0.01    | -9.8756265   | 1.31E-77    | ** |
| siR_410094 | 1.0989  | 0.01    | -6.7799163   | 1.04E-09    | ** |
| siR_410125 | 7.3736  | 0.01    | -9.5262254   | 4.55E-61    | ** |
| siR_410133 | 1.4534  | 0.01    | -7.18328801  | 1.30E-12    | ** |

|            |          |          |               |              |    |
|------------|----------|----------|---------------|--------------|----|
| siR_410148 | 1. 1344  | 0. 01    | -6. 82578563  | 5. 32E-10    | ** |
| siR_410151 | 1. 2053  | 0. 01    | -6. 91324847  | 1. 40E-10    | ** |
| siR_410173 | 21. 27   | 0. 01    | -11. 05460446 | 8. 23E-175   | ** |
| siR_41019  | 0. 01    | 1. 0442  | 6. 70625425   | 1. 77E-09    | ** |
| siR_410200 | 1. 0989  | 0. 01    | -6. 7799163   | 1. 04E-09    | ** |
| siR_410263 | 3. 4386  | 0. 01    | -8. 42567749  | 7. 34E-29    | ** |
| siR_410293 | 4. 7857  | 0. 01    | -8. 90258614  | 6. 91E-40    | ** |
| siR_410365 | 1. 5598  | 0. 01    | -7. 28521726  | 1. 75E-13    | ** |
| siR_41037  | 1. 2407  | 0. 4102  | -1. 59675492  | 0. 000655154 | ** |
| siR_410374 | 1. 3471  | 0. 01    | -7. 07371314  | 9. 66E-12    | ** |
| siR_410376 | 3. 3323  | 0. 01    | -8. 38037447  | 5. 44E-28    | ** |
| siR_41038  | 7. 0191  | 4. 438   | -0. 66137639  | 6. 27E-05    |    |
| siR_410404 | 2. 4106  | 0. 01    | -7. 91324847  | 1. 91E-20    | ** |
| siR_410407 | 1. 3471  | 0. 01    | -7. 07371314  | 9. 66E-12    | ** |
| siR_41045  | 1. 1344  | 0. 3356  | -1. 75711482  | 0. 000500636 | ** |
| siR_41047  | 2. 0206  | 1. 8647  | -0. 11584021  | 0. 682293765 |    |
| siR_410470 | 4. 9275  | 0. 01    | -8. 94471205  | 4. 77E-41    | ** |
| siR_41052  | 2. 0561  | 1. 268   | -0. 69735569  | 0. 024014279 |    |
| siR_410524 | 2. 1624  | 0. 01    | -7. 75648961  | 2. 05E-18    | ** |
| siR_410563 | 1. 2762  | 0. 01    | -6. 99571063  | 3. 67E-11    | ** |
| siR_4106   | 0. 01    | 2. 3868  | 7. 89893387   | 1. 02E-20    | ** |
| siR_41063  | 3. 8995  | 0. 634   | -2. 62073441  | 4. 46E-17    | ** |
| siR_410640 | 10. 3514 | 0. 01    | -10. 01561019 | 1. 93E-85    | ** |
| siR_410641 | 2. 3397  | 0. 01    | -7. 87017976  | 7. 25E-20    | ** |
| siR_410656 | 6. 4519  | 0. 01    | -9. 33358029  | 1. 59E-53    | ** |
| siR_41069  | 2. 5169  | 1. 0815  | -1. 21861423  | 6. 65E-05    | ** |
| siR_41072  | 52. 9622 | 10. 6288 | -2. 31698433  | 1. 20E-184   | ** |
| siR_41073  | 1. 3825  | 0. 2238  | -2. 62699754  | 7. 30E-07    | ** |
| siR_41075  | 2. 1979  | 0. 9696  | -1. 18066414  | 0. 000281955 | ** |
| siR_4108   | 0. 01    | 1. 0069  | 6. 6537766    | 3. 63E-09    | ** |
| siR_41080  | 1. 0989  | 1. 3799  | 0. 32850361   | 0. 350747427 |    |
| siR_41082  | 6. 1328  | 2. 6106  | -1. 23216448  | 2. 85E-10    | ** |
| siR_410843 | 1. 9852  | 0. 01    | -7. 63314056  | 5. 78E-17    | ** |
| siR_410971 | 1. 0989  | 0. 01    | -6. 7799163   | 1. 04E-09    | ** |
| siR_410982 | 1. 1344  | 0. 01    | -6. 82578563  | 5. 32E-10    | ** |
| siR_411007 | 1. 2053  | 0. 01    | -6. 91324847  | 1. 40E-10    | ** |
| siR_411041 | 3. 4741  | 0. 01    | -8. 44049549  | 3. 76E-29    | ** |
| siR_411044 | 4. 254   | 0. 01    | -8. 73267624  | 1. 56E-35    | ** |
| siR_411058 | 2. 3397  | 0. 01    | -7. 87017976  | 7. 25E-20    | ** |
| siR_41126  | 0. 01    | 4. 8855  | 8. 93236241   | 1. 24E-41    | ** |
| siR_41128  | 0. 01    | 2. 4241  | 7. 9213054    | 4. 98E-21    | ** |
| siR_411302 | 2. 7296  | 0. 01    | -8. 09254576  | 4. 66E-23    | ** |
| siR_411340 | 16. 8033 | 0. 01    | -10. 71452887 | 2. 99E-138   | ** |
| siR_411347 | 11. 2022 | 0. 01    | -10. 12956637 | 2. 09E-92    | ** |
| siR_411349 | 24. 3541 | 0. 01    | -11. 24994889 | 4. 70E-200   | ** |
| siR_411360 | 3. 0841  | 0. 01    | -8. 26870574  | 5. 85E-26    | ** |
| siR_411380 | 28. 6081 | 0. 01    | -11. 48220777 | 7. 13E-235   | ** |

|            |         |         |              |             |    |
|------------|---------|---------|--------------|-------------|----|
| siR_4114   | 0.01    | 15.6261 | 10.60974204  | 1.53E-131   | ** |
| siR_411401 | 2.9069  | 0.01    | -8.18333764  | 1.65E-24    | ** |
| siR_411462 | 2.3397  | 0.01    | -7.87017976  | 7.25E-20    | ** |
| siR_411465 | 1.418   | 0.01    | -7.14771372  | 2.54E-12    | ** |
| siR_411469 | 2.5878  | 0.01    | -8.0155823   | 6.75E-22    | ** |
| siR_411470 | 9.2524  | 0.01    | -9.85368377  | 1.90E-76    | ** |
| siR_411479 | 10.8122 | 0.01    | -10.07844431 | 3.25E-89    | ** |
| siR_411504 | 15.3498 | 0.01    | -10.58400411 | 2.36E-126   | ** |
| siR_411509 | 7.0191  | 0.01    | -9.45514222  | 3.63E-58    | ** |
| siR_411515 | 8.5789  | 0.01    | -9.74464887  | 6.20E-71    | ** |
| siR_411525 | 1.2407  | 0.01    | -6.95501051  | 7.17E-11    | ** |
| siR_411527 | 3.0132  | 0.01    | -8.23515263  | 2.23E-25    | ** |
| siR_411591 | 1.3825  | 0.01    | -7.11113566  | 4.95E-12    | ** |
| siR_411600 | 49.6654 | 0.01    | -12.27802554 | 0           | ** |
| siR_411601 | 7.9408  | 0.01    | -9.6331405   | 1.04E-65    | ** |
| siR_411602 | 3.7577  | 0.01    | -8.5537061   | 1.79E-31    | ** |
| siR_411603 | 2.0915  | 0.01    | -7.70839418  | 7.79E-18    | ** |
| siR_411614 | 2.0561  | 0.01    | -7.68376661  | 1.52E-17    | ** |
| siR_411619 | 3.7222  | 0.01    | -8.54001177  | 3.50E-31    | ** |
| siR_41162  | 0.01    | 1.4918  | 7.22091032   | 3.17E-13    | ** |
| siR_41163  | 0.01    | 1.0815  | 6.75688986   | 8.62E-10    | ** |
| siR_411697 | 1.3825  | 0.01    | -7.11113566  | 4.95E-12    | ** |
| siR_41170  | 0.01    | 15.4024 | 10.58893945  | 1.14E-129   | ** |
| siR_41171  | 0.01    | 2.6479  | 8.04870483   | 6.67E-23    | ** |
| siR_411779 | 1.1698  | 0.01    | -6.87011809  | 2.73E-10    | ** |
| siR_41178  | 0.01    | 2.6479  | 8.04870483   | 6.67E-23    | ** |
| siR_411785 | 1.9497  | 0.01    | -7.60710834  | 1.13E-16    | ** |
| siR_41179  | 0.01    | 2.3122  | 7.85312238   | 4.30E-20    | ** |
| siR_411886 | 1.4534  | 0.01    | -7.18328801  | 1.30E-12    | ** |
| siR_411904 | 5.4238  | 0.01    | -9.08316017  | 4.14E-45    | ** |
| siR_411907 | 6.2037  | 0.01    | -9.27698508  | 1.71E-51    | ** |
| siR_411919 | 1.9143  | 0.01    | -7.58067313  | 2.20E-16    | ** |
| siR_41192  | 0.01    | 1.0069  | 6.6537766    | 3.63E-09    | ** |
| siR_411998 | 1.4534  | 0.01    | -7.18328801  | 1.30E-12    | ** |
| siR_411999 | 1.028   | 0.01    | -6.68369645  | 3.95E-09    | ** |
| siR_412009 | 17.2287 | 0.01    | -10.75059825 | 9.86E-142   | ** |
| siR_412043 | 29.069  | 0.01    | -11.50526565 | 1.20E-238   | ** |
| siR_412051 | 6.9127  | 0.01    | -9.43310546  | 2.69E-57    | ** |
| siR_412052 | 4.8566  | 0.01    | -8.92380283  | 1.82E-40    | ** |
| siR_412083 | 1.4889  | 0.01    | -7.21810305  | 6.67E-13    | ** |
| siR_41209  | 1.3825  | 0.2611  | -2.40460512  | 2.46E-06    | ** |
| siR_412096 | 2.4106  | 0.01    | -7.91324847  | 1.91E-20    | ** |
| siR_412129 | 1.9497  | 0.01    | -7.60710834  | 1.13E-16    | ** |
| siR_41215  | 6.1683  | 4.8109  | -0.35856612  | 0.032071388 |    |
| siR_41217  | 1.9143  | 1.529   | -0.32422853  | 0.280552793 |    |
| siR_412233 | 1.2407  | 0.01    | -6.95501051  | 7.17E-11    | ** |
| siR_412307 | 1.2407  | 0.01    | -6.95501051  | 7.17E-11    | ** |

|            |          |         |              |             |    |
|------------|----------|---------|--------------|-------------|----|
| siR_41231  | 3.7931   | 1.8274  | -1.05358495  | 1.26E-05    | ** |
| siR_412434 | 1.1344   | 0.01    | -6.82578563  | 5.32E-10    | ** |
| siR_412450 | 1.3116   | 0.01    | -7.035184    | 1.88E-11    | ** |
| siR_412471 | 21.4118  | 0.01    | -11.06419036 | 5.69E-176   | ** |
| siR_412472 | 3.1196   | 0.01    | -8.28521723  | 3.00E-26    | ** |
| siR_41248  | 2.0915   | 0.5967  | -1.80946032  | 1.17E-06    | ** |
| siR_412564 | 2.8005   | 0.01    | -8.12954063  | 1.23E-23    | ** |
| siR_41257  | 1.0635   | 0.3729  | -1.51195933  | 0.00248896  | ** |
| siR_41263  | 1.3825   | 0.4475  | -1.62731989  | 0.000260107 | ** |
| siR_412631 | 1.4534   | 0.01    | -7.18328801  | 1.30E-12    | ** |
| siR_412659 | 1.9497   | 0.01    | -7.60710834  | 1.13E-16    | ** |
| siR_41270  | 0.01     | 7.6825  | 9.58543205   | 4.78E-65    | ** |
| siR_412756 | 94.5096  | 0.01    | -13.20624458 | 0           | ** |
| siR_412757 | 1.1344   | 0.01    | -6.82578563  | 5.32E-10    | ** |
| siR_412762 | 4.0767   | 0.01    | -8.67125799  | 4.39E-34    | ** |
| siR_41277  | 1.3825   | 0.2984  | -2.21196004  | 7.41E-06    | ** |
| siR_412776 | 1.0989   | 0.01    | -6.7799163   | 1.04E-09    | ** |
| siR_41279  | 6.381    | 5.6687  | -0.17076461  | 0.283591653 |    |
| siR_41280  | 2.6942   | 1.1561  | -1.22059076  | 3.57E-05    | ** |
| siR_41283  | 1.2407   | 0.634   | -0.96859957  | 0.020904832 |    |
| siR_412832 | 1.028    | 0.01    | -6.68369645  | 3.95E-09    | ** |
| siR_412894 | 5.8138   | 0.01    | -9.18333764  | 2.66E-48    | ** |
| siR_412937 | 2.2688   | 0.01    | -7.82578561  | 2.76E-19    | ** |
| siR_412940 | 4.0058   | 0.01    | -8.64594661  | 1.67E-33    | ** |
| siR_412961 | 1.4534   | 0.01    | -7.18328801  | 1.30E-12    | ** |
| siR_4130   | 1.1344   | 0.5594  | -1.01997728  | 0.02136103  | *  |
| siR_413023 | 2.5169   | 0.01    | -7.97550407  | 2.57E-21    | ** |
| siR_413026 | 1.9143   | 0.01    | -7.58067313  | 2.20E-16    | ** |
| siR_41309  | 3.1905   | 1.8647  | -0.77483899  | 0.001998225 |    |
| siR_413125 | 1.1698   | 0.01    | -6.87011809  | 2.73E-10    | ** |
| siR_413174 | 11.5567  | 0.01    | -10.17451381 | 2.63E-95    | ** |
| siR_413241 | 1.2407   | 0.01    | -6.95501051  | 7.17E-11    | ** |
| siR_413345 | 1.6661   | 0.01    | -7.38033118  | 2.36E-14    | ** |
| siR_413348 | 2.2333   | 0.01    | -7.80303324  | 5.38E-19    | ** |
| siR_413349 | 3.3323   | 0.01    | -8.38037447  | 5.44E-28    | ** |
| siR_41336  | 10.3868  | 3.6548  | -1.50688689  | 9.71E-22    | ** |
| siR_41338  | 1.7016   | 1.0442  | -0.70449387  | 0.038640539 |    |
| siR_413420 | 1.5952   | 0.01    | -7.31759351  | 8.99E-14    | ** |
| siR_413474 | 3.1196   | 0.01    | -8.28521723  | 3.00E-26    | ** |
| siR_413605 | 1.6307   | 0.01    | -7.34934759  | 4.61E-14    | ** |
| siR_41361  | 0.4963   | 1.1188  | 1.1726678    | 0.009993026 | ** |
| siR_413618 | 10.4577  | 0.01    | -10.03034988 | 2.59E-86    | ** |
| siR_413621 | 2.0206   | 0.01    | -7.65863995  | 2.96E-17    | ** |
| siR_41367  | 117.3039 | 49.6754 | -1.23964749  | 5.99E-170   | ** |
| siR_41368  | 8.508    | 2.536   | -1.74626529  | 5.67E-22    | ** |
| siR_413689 | 2.6942   | 0.01    | -8.07371315  | 9.10E-23    | ** |
| siR_41373  | 1.3825   | 0.7459  | -0.89022535  | 0.022894115 |    |

|            |          |          |               |              |    |
|------------|----------|----------|---------------|--------------|----|
| siR_413750 | 1. 2407  | 0. 01    | -6. 95501051  | 7. 17E-11    | ** |
| siR_41376  | 4. 3603  | 2. 3122  | -0. 91516121  | 3. 05E-05    |    |
| siR_413772 | 1. 9497  | 0. 01    | -7. 60710834  | 1. 13E-16    | ** |
| siR_413782 | 3. 4741  | 0. 01    | -8. 44049549  | 3. 76E-29    | ** |
| siR_413814 | 1. 5243  | 0. 01    | -7. 25200305  | 3. 42E-13    | ** |
| siR_41383  | 1. 2053  | 0. 5967  | -1. 0143146   | 0. 01809496  | *  |
| siR_41388  | 1. 2053  | 0. 1865  | -2. 69214474  | 2. 94E-06    | ** |
| siR_413977 | 6. 8773  | 0. 01    | -9. 42569848  | 5. 25E-57    | ** |
| siR_413978 | 2. 1979  | 0. 01    | -7. 77998195  | 1. 05E-18    | ** |
| siR_413979 | 1. 1344  | 0. 01    | -6. 82578563  | 5. 32E-10    | ** |
| siR_414005 | 5. 1048  | 0. 01    | -8. 99571063  | 1. 69E-42    | ** |
| siR_414029 | 1. 8434  | 0. 01    | -7. 52622535  | 8. 37E-16    | ** |
| siR_41415  | 8. 827   | 6. 7875  | -0. 3790429   | 0. 00686286  |    |
| siR_41420  | 1. 418   | 1. 0442  | -0. 44145947  | 0. 216543272 |    |
| siR_414307 | 1. 2762  | 0. 01    | -6. 99571063  | 3. 67E-11    | ** |
| siR_414502 | 2. 0206  | 0. 01    | -7. 65863995  | 2. 96E-17    | ** |
| siR_414521 | 7. 409   | 0. 01    | -9. 53313504  | 2. 33E-61    | ** |
| siR_414575 | 1. 3825  | 0. 01    | -7. 11113566  | 4. 95E-12    | ** |
| siR_414648 | 1. 3471  | 0. 01    | -7. 07371314  | 9. 66E-12    | ** |
| siR_41465  | 7. 09    | 1. 7155  | -2. 0471565   | 1. 31E-22    | ** |
| siR_414764 | 1. 418   | 0. 01    | -7. 14771372  | 2. 54E-12    | ** |
| siR_41477  | 1. 3825  | 0. 5967  | -1. 2122018   | 0. 003421985 | ** |
| siR_414818 | 1. 4889  | 0. 01    | -7. 21810305  | 6. 67E-13    | ** |
| siR_414819 | 1. 3471  | 0. 01    | -7. 07371314  | 9. 66E-12    | ** |
| siR_414840 | 20. 9864 | 0. 01    | -11. 03523889 | 1. 73E-172   | ** |
| siR_414841 | 4. 2894  | 0. 01    | -8. 74463204  | 7. 97E-36    | ** |
| siR_414842 | 1. 4534  | 0. 01    | -7. 18328801  | 1. 30E-12    | ** |
| siR_414868 | 3. 2614  | 0. 01    | -8. 34934759  | 2. 07E-27    | ** |
| siR_414873 | 2. 836   | 0. 01    | -8. 14771372  | 6. 28E-24    | ** |
| siR_415013 | 2. 8714  | 0. 01    | -8. 16561052  | 3. 22E-24    | ** |
| siR_415056 | 2. 8714  | 0. 01    | -8. 16561052  | 3. 22E-24    | ** |
| siR_415111 | 5. 4593  | 0. 01    | -9. 09257214  | 2. 12E-45    | ** |
| siR_415124 | 7. 0191  | 0. 01    | -9. 45514222  | 3. 63E-58    | ** |
| siR_415131 | 1. 8434  | 0. 01    | -7. 52622535  | 8. 37E-16    | ** |
| siR_41515  | 0. 01    | 14. 0598 | 10. 45736036  | 1. 98E-118   | ** |
| siR_41522  | 0. 01    | 41. 0233 | 12. 00222783  | 0            | ** |
| siR_41523  | 0. 01    | 1. 6036  | 7. 32517051   | 3. 67E-14    | ** |
| siR_415233 | 1. 8434  | 0. 01    | -7. 52622535  | 8. 37E-16    | ** |
| siR_415301 | 1. 0989  | 0. 01    | -6. 7799163   | 1. 04E-09    | ** |
| siR_41531  | 0. 01    | 3. 8786  | 8. 59939219   | 3. 33E-33    | ** |
| siR_415361 | 2. 127   | 0. 01    | -7. 73267621  | 3. 99E-18    | ** |
| siR_415369 | 1. 5598  | 0. 01    | -7. 28521726  | 1. 75E-13    | ** |
| siR_41539  | 0. 01    | 1. 3799  | 7. 10841991   | 2. 74E-12    | ** |
| siR_415425 | 1. 8434  | 0. 01    | -7. 52622535  | 8. 37E-16    | ** |
| siR_415434 | 1. 4889  | 0. 01    | -7. 21810305  | 6. 67E-13    | ** |
| siR_415438 | 1. 1344  | 0. 01    | -6. 82578563  | 5. 32E-10    | ** |
| siR_41548  | 47. 8929 | 22. 0407 | -1. 11964175  | 3. 03E-60    | ** |

|            |         |        |              |             |    |
|------------|---------|--------|--------------|-------------|----|
| siR_41549  | 4.1831  | 1.3053 | -1.68019106  | 5.39E-11    | ** |
| siR_415490 | 1.028   | 0.01   | -6.68369645  | 3.95E-09    | ** |
| siR_41572  | 2.8714  | 0.7832 | -1.87430165  | 4.94E-09    | ** |
| siR_415726 | 1.1698  | 0.01   | -6.87011809  | 2.73E-10    | ** |
| siR_415778 | 2.3397  | 0.01   | -7.87017976  | 7.25E-20    | ** |
| siR_415806 | 1.5952  | 0.01   | -7.31759351  | 8.99E-14    | ** |
| siR_415812 | 3.6513  | 0.01   | -8.51226639  | 1.33E-30    | ** |
| siR_415829 | 1.418   | 0.01   | -7.14771372  | 2.54E-12    | ** |
| siR_415840 | 14.7117 | 0.01   | -10.52274825 | 3.94E-121   | ** |
| siR_415895 | 34.9537 | 0.01   | -11.77122969 | 8.21E-287   | ** |
| siR_415898 | 12.5138 | 0.01   | -10.28930419 | 3.84E-103   | ** |
| siR_415901 | 3.3323  | 0.01   | -8.38037447  | 5.44E-28    | ** |
| siR_415928 | 7.3027  | 0.01   | -9.5122862   | 1.73E-60    | ** |
| siR_41595  | 1.3116  | 0.7086 | -0.88828444  | 0.027066419 |    |
| siR_415967 | 2.0206  | 0.01   | -7.65863995  | 2.96E-17    | ** |
| siR_415979 | 5.1402  | 0.01   | -9.00568068  | 8.67E-43    | ** |
| siR_41604  | 1.3825  | 0.5221 | -1.40488142  | 0.001042064 | ** |
| siR_41608  | 10.1387 | 9.8456 | -0.04232165  | 0.732370794 |    |
| siR_41609  | 1.7016  | 1.1188 | -0.60493978  | 0.070773479 |    |
| siR_416103 | 2.127   | 0.01   | -7.73267621  | 3.99E-18    | ** |
| siR_41611  | 4.3958  | 1.1188 | -1.97417359  | 5.90E-14    | ** |
| siR_416119 | 4.963   | 0.01   | -8.95506867  | 2.45E-41    | ** |
| siR_41630  | 2.1624  | 1.268  | -0.77007867  | 0.01158066  |    |
| siR_416324 | 1.0635  | 0.01   | -6.73267622  | 2.02E-09    | ** |
| siR_416330 | 8.4016  | 0.01   | -9.71452026  | 1.75E-69    | ** |
| siR_41636  | 1.028   | 0.2238 | -2.19955832  | 0.000127871 | ** |
| siR_41654  | 0.01    | 1.3426 | 7.06888574   | 5.63E-12    | ** |
| siR_416569 | 7.4799  | 0.01   | -9.54687514  | 6.13E-62    | ** |
| siR_41658  | 0.6026  | 1.3426 | 1.15575697   | 0.005196319 | ** |
| siR_416638 | 2.6587  | 0.01   | -8.05457718  | 1.77E-22    | ** |
| siR_416795 | 1.0989  | 0.01   | -6.7799163   | 1.04E-09    | ** |
| siR_41685  | 1.418   | 0.1492 | -3.24853809  | 2.36E-08    | ** |
| siR_416858 | 2.6587  | 0.01   | -8.05457718  | 1.77E-22    | ** |
| siR_41687  | 5.991   | 2.0885 | -1.52032969  | 2.60E-13    | ** |
| siR_416937 | 2.5878  | 0.01   | -8.0155823   | 6.75E-22    | ** |
| siR_416946 | 1.6307  | 0.01   | -7.34934759  | 4.61E-14    | ** |
| siR_416987 | 2.1979  | 0.01   | -7.77998195  | 1.05E-18    | ** |
| siR_417038 | 1.7016  | 0.01   | -7.41074813  | 1.21E-14    | ** |
| siR_417050 | 14.499  | 0.01   | -10.50173776 | 2.17E-119   | ** |
| siR_417053 | 1.3825  | 0.01   | -7.11113566  | 4.95E-12    | ** |
| siR_417125 | 1.3825  | 0.01   | -7.11113566  | 4.95E-12    | ** |
| siR_417129 | 1.1344  | 0.01   | -6.82578563  | 5.32E-10    | ** |
| siR_417178 | 1.3825  | 0.01   | -7.11113566  | 4.95E-12    | ** |
| siR_417203 | 1.3825  | 0.01   | -7.11113566  | 4.95E-12    | ** |
| siR_41722  | 1.3825  | 0.3356 | -2.04246486  | 2.03E-05    | ** |
| siR_417361 | 2.0206  | 0.01   | -7.65863995  | 2.96E-17    | ** |
| siR_41738  | 5.0339  | 0.7459 | -2.75462243  | 9.17E-23    | ** |

|            |           |         |               |              |    |
|------------|-----------|---------|---------------|--------------|----|
| siR_417406 | 1. 2762   | 0. 01   | -6. 99571063  | 3. 67E-11    | ** |
| siR_41745  | 4. 7148   | 4. 8855 | 0. 05130965   | 0. 771615501 |    |
| siR_417478 | 3. 1196   | 0. 01   | -8. 28521723  | 3. 00E-26    | ** |
| siR_417512 | 37. 2225  | 0. 01   | -11. 8619593  | 2. 21E-305   | ** |
| siR_417557 | 2. 8714   | 0. 01   | -8. 16561052  | 3. 22E-24    | ** |
| siR_417558 | 1. 5243   | 0. 01   | -7. 25200305  | 3. 42E-13    | ** |
| siR_417564 | 6. 1683   | 0. 01   | -9. 26872915  | 3. 34E-51    | ** |
| siR_417565 | 3. 6159   | 0. 01   | -8. 49821097  | 2. 60E-30    | ** |
| siR_417578 | 2. 5169   | 0. 01   | -7. 97550407  | 2. 57E-21    | ** |
| siR_417579 | 1. 028    | 0. 01   | -6. 68369645  | 3. 95E-09    | ** |
| siR_417584 | 1. 9143   | 0. 01   | -7. 58067313  | 2. 20E-16    | ** |
| siR_417585 | 1. 5598   | 0. 01   | -7. 28521726  | 1. 75E-13    | ** |
| siR_417614 | 1. 2762   | 0. 01   | -6. 99571063  | 3. 67E-11    | ** |
| siR_417616 | 2. 0915   | 0. 01   | -7. 70839418  | 7. 79E-18    | ** |
| siR_417645 | 3. 0487   | 0. 01   | -8. 25205038  | 1. 14E-25    | ** |
| siR_417657 | 2. 3751   | 0. 01   | -7. 89184446  | 3. 72E-20    | ** |
| siR_41768  | 0. 01     | 3. 9159 | 8. 61320011   | 1. 62E-33    | ** |
| siR_417684 | 4. 4667   | 0. 01   | -8. 80306553  | 2. 82E-37    | ** |
| siR_417685 | 2. 9778   | 0. 01   | -8. 21810305  | 4. 34E-25    | ** |
| siR_417686 | 1. 5243   | 0. 01   | -7. 25200305  | 3. 42E-13    | ** |
| siR_41769  | 0. 01     | 2. 6106 | 8. 02823761   | 1. 37E-22    | ** |
| siR_417698 | 12. 8683  | 0. 01   | -10. 32960581 | 4. 82E-106   | ** |
| siR_417706 | 2. 127    | 0. 01   | -7. 73267621  | 3. 99E-18    | ** |
| siR_417753 | 4. 0413   | 0. 01   | -8. 65867564  | 8. 57E-34    | ** |
| siR_417756 | 992. 3506 | 0. 01   | -16. 59855996 | 0            | ** |
| siR_417757 | 1. 9497   | 0. 01   | -7. 60710834  | 1. 13E-16    | ** |
| siR_417758 | 1. 9143   | 0. 01   | -7. 58067313  | 2. 20E-16    | ** |
| siR_417884 | 11. 2731  | 0. 01   | -10. 13866865 | 5. 50E-93    | ** |
| siR_417897 | 1. 0989   | 0. 01   | -6. 7799163   | 1. 04E-09    | ** |
| siR_4179   | 2. 836    | 1. 902  | -0. 57634029  | 0. 024940499 |    |
| siR_41791  | 1. 3471   | 0. 2984 | -2. 17453751  | 1. 21E-05    | ** |
| siR_417927 | 13. 081   | 0. 01   | -10. 35325721 | 8. 76E-108   | ** |
| siR_41794  | 10. 245   | 2. 2376 | -2. 19489592  | 8. 34E-35    | ** |
| siR_41819  | 1. 2407   | 0. 3356 | -1. 88633969  | 0. 000130463 | ** |
| siR_41820  | 1. 8788   | 0. 2984 | -2. 65449206  | 5. 42E-09    | ** |
| siR_41821  | 9. 5006   | 3. 6921 | -1. 363577    | 1. 92E-17    | ** |
| siR_41822  | 1. 6307   | 0. 634  | -1. 36293665  | 0. 000487944 | ** |
| siR_41823  | 1. 028    | 0. 3356 | -1. 61502564  | 0. 001825058 | ** |
| siR_418240 | 1. 3471   | 0. 01   | -7. 07371314  | 9. 66E-12    | ** |
| siR_418243 | 1. 0635   | 0. 01   | -6. 73267622  | 2. 02E-09    | ** |
| siR_418339 | 1. 0635   | 0. 01   | -6. 73267622  | 2. 02E-09    | ** |
| siR_41836  | 1. 1698   | 0. 2611 | -2. 16358753  | 5. 01E-05    | ** |
| siR_418576 | 1. 2762   | 0. 01   | -6. 99571063  | 3. 67E-11    | ** |
| siR_418766 | 2. 0915   | 0. 01   | -7. 70839418  | 7. 79E-18    | ** |
| siR_4188   | 3. 0132   | 2. 163  | -0. 47826277  | 0. 050983946 |    |
| siR_418922 | 12. 6556  | 0. 01   | -10. 30556026 | 2. 66E-104   | ** |
| siR_418954 | 1. 5598   | 0. 01   | -7. 28521726  | 1. 75E-13    | ** |



|            |          |         |              |             |    |
|------------|----------|---------|--------------|-------------|----|
| siR_418957 | 1.1698   | 0.01    | -6.87011809  | 2.73E-10    | ** |
| siR_41899  | 0.01     | 1.7901  | 7.48389637   | 1.01E-15    | ** |
| siR_41905  | 3.7931   | 1.6782  | -1.17646275  | 1.81E-06    | ** |
| siR_419093 | 1.028    | 0.01    | -6.68369645  | 3.95E-09    | ** |
| siR_419130 | 5.5656   | 0.01    | -9.12039339  | 2.86E-46    | ** |
| siR_419144 | 2.6233   | 0.01    | -8.035239    | 3.46E-22    | ** |
| siR_419185 | 6.7709   | 0.01    | -9.40320384  | 3.90E-56    | ** |
| siR_41921  | 30.1325  | 12.0459 | -1.32277819  | 1.34E-49    | ** |
| siR_41922  | 3.5095   | 1.5663  | -1.16390494  | 5.35E-06    | ** |
| siR_41923  | 1.9143   | 0.7832  | -1.28936427  | 0.000286776 | ** |
| siR_41926  | 131.9802 | 34.7952 | -1.9233613   | 0           | ** |
| siR_41933  | 1.2053   | 0.4102  | -1.55499288  | 0.000989728 | ** |
| siR_419385 | 4.5376   | 0.01    | -8.82578561  | 7.42E-38    | ** |
| siR_419411 | 1.2762   | 0.01    | -6.99571063  | 3.67E-11    | ** |
| siR_419421 | 4.2894   | 0.01    | -8.74463204  | 7.97E-36    | ** |
| siR_419439 | 1.6307   | 0.01    | -7.34934759  | 4.61E-14    | ** |
| siR_41947  | 30.8769  | 8.8014  | -1.81072299  | 2.70E-79    | ** |
| siR_419477 | 3.4386   | 0.01    | -8.42567749  | 7.34E-29    | ** |
| siR_419478 | 8.6143   | 0.01    | -9.75058979  | 3.18E-71    | ** |
| siR_419488 | 1.418    | 0.01    | -7.14771372  | 2.54E-12    | ** |
| siR_419491 | 657.8448 | 0.01    | -16.00545526 | 0           | ** |
| siR_419507 | 3.6513   | 0.01    | -8.51226639  | 1.33E-30    | ** |
| siR_41953  | 2.3751   | 1.268   | -0.90543351  | 0.002364713 | ** |
| siR_41958  | 0.01     | 2.7225  | 8.08878824   | 1.58E-23    | ** |
| siR_419589 | 2.9778   | 0.01    | -8.21810305  | 4.34E-25    | ** |
| siR_41959  | 0.01     | 2.0885  | 7.70632333   | 3.21E-18    | ** |
| siR_419624 | 6.7355   | 0.01    | -9.39564121  | 7.60E-56    | ** |
| siR_419692 | 4.9984   | 0.01    | -8.96532255  | 1.25E-41    | ** |
| siR_41970  | 6.4519   | 1.9766  | -1.70670313  | 1.57E-16    | ** |
| siR_419704 | 1.2053   | 0.01    | -6.91324847  | 1.40E-10    | ** |
| siR_419727 | 1.2762   | 0.01    | -6.99571063  | 3.67E-11    | ** |
| siR_41973  | 210.1119 | 77.4221 | -1.44034053  | 0           | ** |
| siR_419738 | 1.1698   | 0.01    | -6.87011809  | 2.73E-10    | ** |
| siR_41974  | 11.8403  | 3.7667  | -1.6523326   | 7.53E-28    | ** |
| siR_41975  | 8.8979   | 3.3937  | -1.39060585  | 7.00E-17    | ** |
| siR_41982  | 1.8434   | 0.4848  | -1.92690755  | 1.98E-06    | ** |
| siR_41989  | 1.0989   | 0.2611  | -2.07338574  | 0.000132441 | ** |
| siR_419897 | 10.4932  | 0.01    | -10.03523904 | 1.33E-86    | ** |
| siR_419912 | 1.3116   | 0.01    | -7.035184    | 1.88E-11    | ** |
| siR_41999  | 2.3042   | 0.7832  | -1.55681328  | 4.39E-06    | ** |
| siR_420    | 0.01     | 1.6036  | 7.32517051   | 3.67E-14    | ** |
| siR_420013 | 3.2614   | 0.01    | -8.34934759  | 2.07E-27    | ** |
| siR_420082 | 1.5952   | 0.01    | -7.31759351  | 8.99E-14    | ** |
| siR_420083 | 1.5598   | 0.01    | -7.28521726  | 1.75E-13    | ** |
| siR_420089 | 1.1344   | 0.01    | -6.82578563  | 5.32E-10    | ** |
| siR_420096 | 2.0561   | 0.01    | -7.68376661  | 1.52E-17    | ** |
| siR_420131 | 3.1196   | 0.01    | -8.28521723  | 3.00E-26    | ** |

|            |          |         |              |             |    |
|------------|----------|---------|--------------|-------------|----|
| siR_420155 | 3.7222   | 0.01    | -8.54001177  | 3.50E-31    | ** |
| siR_420172 | 115.1415 | 0.01    | -13.49111961 | 0           | ** |
| siR_420177 | 5.672    | 0.01    | -9.14771376  | 3.85E-47    | ** |
| siR_420193 | 1.0635   | 0.01    | -6.73267622  | 2.02E-09    | ** |
| siR_42023  | 7.799    | 2.9089  | -1.42281545  | 1.89E-15    | ** |
| siR_420284 | 2.2688   | 0.01    | -7.82578561  | 2.76E-19    | ** |
| siR_420292 | 8.4371   | 0.01    | -9.72060336  | 8.98E-70    | ** |
| siR_42032  | 42.1854  | 15.2159 | -1.47116411  | 1.99E-80    | ** |
| siR_42033  | 20.6673  | 6.8248  | -1.59849125  | 2.79E-45    | ** |
| siR_420339 | 1.2762   | 0.01    | -6.99571063  | 3.67E-11    | ** |
| siR_420342 | 2.8714   | 0.01    | -8.16561052  | 3.22E-24    | ** |
| siR_420385 | 1.0635   | 0.01    | -6.73267622  | 2.02E-09    | ** |
| siR_42040  | 2.9778   | 1.0069  | -1.56432645  | 1.54E-07    | ** |
| siR_42041  | 1.5598   | 1.268   | -0.29880631  | 0.368280846 |    |
| siR_420442 | 2.5878   | 0.01    | -8.0155823   | 6.75E-22    | ** |
| siR_420458 | 1.9143   | 0.01    | -7.58067313  | 2.20E-16    | ** |
| siR_420474 | 2.446    | 0.01    | -7.93428061  | 9.77E-21    | ** |
| siR_420496 | 4.963    | 0.01    | -8.95506867  | 2.45E-41    | ** |
| siR_42053  | 1.418    | 0.5594  | -1.34190537  | 0.001335576 | ** |
| siR_420548 | 10.1741  | 0.01    | -9.9906855   | 5.44E-84    | ** |
| siR_420551 | 12.762   | 0.01    | -10.3176388  | 3.58E-105   | ** |
| siR_420554 | 1.1344   | 0.01    | -6.82578563  | 5.32E-10    | ** |
| siR_420559 | 5.3529   | 0.01    | -9.06417692  | 1.57E-44    | ** |
| siR_42056  | 4.3603   | 2.5733  | -0.76080774  | 0.000369057 |    |
| siR_420601 | 9.7487   | 0.01    | -9.92906603  | 1.65E-80    | ** |
| siR_42061  | 0.01     | 6.3773  | 9.31680194   | 4.04E-54    | ** |
| siR_42063  | 13.7546  | 6.0789  | -1.17803199  | 6.87E-20    | ** |
| siR_420633 | 1.0989   | 0.01    | -6.7799163   | 1.04E-09    | ** |
| siR_420647 | 1.418    | 0.01    | -7.14771372  | 2.54E-12    | ** |
| siR_420677 | 1.5598   | 0.01    | -7.28521726  | 1.75E-13    | ** |
| siR_420712 | 4.1831   | 0.01    | -8.70842867  | 5.92E-35    | ** |
| siR_420714 | 19.2493  | 0.01    | -10.9105903  | 2.85E-158   | ** |
| siR_420776 | 1.5243   | 0.01    | -7.25200305  | 3.42E-13    | ** |
| siR_420798 | 2.1624   | 0.01    | -7.75648961  | 2.05E-18    | ** |
| siR_420813 | 4.9275   | 0.01    | -8.94471205  | 4.77E-41    | ** |
| siR_420814 | 2.127    | 0.01    | -7.73267621  | 3.99E-18    | ** |
| siR_420827 | 1.3471   | 0.01    | -7.07371314  | 9.66E-12    | ** |
| siR_420881 | 4.8212   | 0.01    | -8.91324847  | 3.54E-40    | ** |
| siR_420906 | 1.3825   | 0.01    | -7.11113566  | 4.95E-12    | ** |
| siR_420917 | 33.8902  | 0.01    | -11.7266522  | 4.16E-278   | ** |
| siR_420923 | 21.8017  | 0.01    | -11.09022501 | 3.66E-179   | ** |
| siR_420945 | 3.1196   | 0.01    | -8.28521723  | 3.00E-26    | ** |
| siR_421001 | 1.4889   | 0.01    | -7.21810305  | 6.67E-13    | ** |
| siR_421002 | 1.5598   | 0.01    | -7.28521726  | 1.75E-13    | ** |
| siR_421003 | 1.5598   | 0.01    | -7.28521726  | 1.75E-13    | ** |
| siR_421005 | 1.6307   | 0.01    | -7.34934759  | 4.61E-14    | ** |
| siR_421032 | 1.3825   | 0.01    | -7.11113566  | 4.95E-12    | ** |

|            |          |         |              |             |    |
|------------|----------|---------|--------------|-------------|----|
| siR_421034 | 12.0175  | 0.01    | -10.23092113 | 4.44E-99    | ** |
| siR_421050 | 3.8995   | 0.01    | -8.60714536  | 1.24E-32    | ** |
| siR_421052 | 1.9497   | 0.01    | -7.60710834  | 1.13E-16    | ** |
| siR_421058 | 4.2185   | 0.01    | -8.72058632  | 3.03E-35    | ** |
| siR_421064 | 1.6661   | 0.01    | -7.38033118  | 2.36E-14    | ** |
| siR_421115 | 2.2333   | 0.01    | -7.80303324  | 5.38E-19    | ** |
| siR_421130 | 1.3116   | 0.01    | -7.035184    | 1.88E-11    | ** |
| siR_421136 | 7.2318   | 0.01    | -9.49821097  | 6.58E-60    | ** |
| siR_421340 | 2.0206   | 0.01    | -7.65863995  | 2.96E-17    | ** |
| siR_421472 | 2.4106   | 0.01    | -7.91324847  | 1.91E-20    | ** |
| siR_421485 | 1.8079   | 0.01    | -7.49817107  | 1.63E-15    | ** |
| siR_421616 | 6.8773   | 0.01    | -9.42569848  | 5.25E-57    | ** |
| siR_42164  | 1.5243   | 0.4848  | -1.65268527  | 0.000103474 | ** |
| siR_42169  | 2.3397   | 1.0069  | -1.21640315  | 0.000124126 | ** |
| siR_4217   | 141.0199 | 32.6321 | -2.11153502  | 0           | ** |
| siR_421715 | 1.3825   | 0.01    | -7.11113566  | 4.95E-12    | ** |
| siR_421739 | 2.8714   | 0.01    | -8.16561052  | 3.22E-24    | ** |
| siR_421791 | 3.9349   | 0.01    | -8.62018319  | 6.36E-33    | ** |
| siR_4218   | 4.4667   | 1.1188  | -1.9972572   | 2.36E-14    | ** |
| siR_421820 | 1.8434   | 0.01    | -7.52622535  | 8.37E-16    | ** |
| siR_421902 | 2.446    | 0.01    | -7.93428061  | 9.77E-21    | ** |
| siR_421903 | 1.6661   | 0.01    | -7.38033118  | 2.36E-14    | ** |
| siR_421938 | 2.1979   | 0.01    | -7.77998195  | 1.05E-18    | ** |
| siR_421939 | 15.1726  | 0.01    | -10.56725266 | 6.65E-125   | ** |
| siR_421951 | 1.1344   | 0.01    | -6.82578563  | 5.32E-10    | ** |
| siR_421991 | 3.0132   | 0.01    | -8.23515263  | 2.23E-25    | ** |
| siR_4220   | 36.9743  | 6.5264  | -2.50216352  | 1.33E-141   | ** |
| siR_422062 | 6.5937   | 0.01    | -9.36494442  | 1.10E-54    | ** |
| siR_422166 | 7.6217   | 0.01    | -9.57396906  | 4.23E-63    | ** |
| siR_422167 | 1.028    | 0.01    | -6.68369645  | 3.95E-09    | ** |
| siR_422192 | 3.8286   | 0.01    | -8.58067313  | 4.72E-32    | ** |
| siR_422196 | 4.3958   | 0.01    | -8.77998192  | 1.07E-36    | ** |
| siR_42223  | 20.88    | 9.1743  | -1.18645172  | 1.08E-29    | ** |
| siR_422357 | 7.0191   | 0.01    | -9.45514222  | 3.63E-58    | ** |
| siR_422415 | 1.1698   | 0.01    | -6.87011809  | 2.73E-10    | ** |
| siR_422482 | 3.6868   | 0.01    | -8.52622535  | 6.83E-31    | ** |
| siR_422586 | 1.0989   | 0.01    | -6.7799163   | 1.04E-09    | ** |
| siR_42284  | 3.4032   | 1.3053  | -1.38251052  | 3.02E-07    | ** |
| siR_42293  | 0.01     | 2.2376  | 7.80580835   | 1.81E-19    | ** |
| siR_422930 | 1.7725   | 0.01    | -7.46964183  | 3.18E-15    | ** |
| siR_42303  | 0.01     | 5.4076  | 9.07884463   | 5.28E-46    | ** |
| siR_423089 | 1.028    | 0.01    | -6.68369645  | 3.95E-09    | ** |
| siR_423115 | 2.9778   | 0.01    | -8.21810305  | 4.34E-25    | ** |
| siR_42322  | 3.0132   | 0.8205  | -1.8767212   | 1.98E-09    | ** |
| siR_42326  | 1.1344   | 0.7459  | -0.60487531  | 0.14203681  |    |
| siR_423266 | 8.1889   | 0.01    | -9.6775259   | 9.64E-68    | ** |
| siR_423281 | 1.6661   | 0.01    | -7.38033118  | 2.36E-14    | ** |

|            |          |          |              |              |    |
|------------|----------|----------|--------------|--------------|----|
| siR_423282 | 1. 2407  | 0. 01    | -6. 95501051 | 7. 17E-11    | ** |
| siR_423292 | 1. 1698  | 0. 01    | -6. 87011809 | 2. 73E-10    | ** |
| siR_42339  | 2. 9778  | 1. 0069  | -1. 56432645 | 1. 54E-07    | ** |
| siR_423473 | 2. 3751  | 0. 01    | -7. 89184446 | 3. 72E-20    | ** |
| siR_423495 | 2. 6233  | 0. 01    | -8. 035239   | 3. 46E-22    | ** |
| siR_423497 | 6. 9836  | 0. 01    | -9. 44782715 | 7. 07E-58    | ** |
| siR_42350  | 1. 737   | 0. 4102  | -2. 08219836 | 1. 23E-06    | ** |
| siR_42355  | 0. 01    | 2. 1258  | 7. 73186206  | 1. 57E-18    | ** |
| siR_423597 | 2. 127   | 0. 01    | -7. 73267621 | 3. 99E-18    | ** |
| siR_423607 | 2. 9069  | 0. 01    | -8. 18333764 | 1. 65E-24    | ** |
| siR_42362  | 71. 5026 | 29. 8724 | -1. 25918255 | 6. 88E-107   | ** |
| siR_42363  | 2. 127   | 1. 1188  | -0. 92686787 | 0. 0033742   |    |
| siR_423648 | 2. 5878  | 0. 01    | -8. 0155823  | 6. 75E-22    | ** |
| siR_42368  | 3. 8286  | 2. 8343  | -0. 43382447 | 0. 044089343 |    |
| siR_423689 | 4. 8566  | 0. 01    | -8. 92380283 | 1. 82E-40    | ** |
| siR_42370  | 1. 1344  | 0. 5967  | -0. 92685176 | 0. 033495577 |    |
| siR_423724 | 2. 0561  | 0. 01    | -7. 68376661 | 1. 52E-17    | ** |
| siR_423758 | 5. 3884  | 0. 01    | -9. 07371312 | 8. 07E-45    | ** |
| siR_42376  | 31. 3732 | 26. 2922 | -0. 25489782 | 0. 00045277  |    |
| siR_42378  | 1. 2407  | 0. 4102  | -1. 59675492 | 0. 000655154 | ** |
| siR_423820 | 1. 8079  | 0. 01    | -7. 49817107 | 1. 63E-15    | ** |
| siR_423824 | 22. 0144 | 0. 01    | -11. 1042319 | 6. 64E-181   | ** |
| siR_423851 | 1. 5243  | 0. 01    | -7. 25200305 | 3. 42E-13    | ** |
| siR_42386  | 1. 5243  | 1. 8274  | 0. 26164559  | 0. 385989105 |    |
| siR_423881 | 1. 3116  | 0. 01    | -7. 035184   | 1. 88E-11    | ** |
| siR_42391  | 1. 9852  | 0. 2611  | -2. 92661    | 2. 68E-10    | ** |
| siR_423922 | 1. 6307  | 0. 01    | -7. 34934759 | 4. 61E-14    | ** |
| siR_423923 | 1. 2762  | 0. 01    | -6. 99571063 | 3. 67E-11    | ** |
| siR_42393  | 4. 0058  | 2. 4241  | -0. 72464118 | 0. 001073004 |    |
| siR_423999 | 1. 0635  | 0. 01    | -6. 73267622 | 2. 02E-09    | ** |
| siR_42404  | 6. 7355  | 5. 8178  | -0. 21131134 | 0. 175698566 |    |
| siR_424049 | 1. 5598  | 0. 01    | -7. 28521726 | 1. 75E-13    | ** |
| siR_424052 | 1. 1698  | 0. 01    | -6. 87011809 | 2. 73E-10    | ** |
| siR_424058 | 1. 418   | 0. 01    | -7. 14771372 | 2. 54E-12    | ** |
| siR_424059 | 1. 1344  | 0. 01    | -6. 82578563 | 5. 32E-10    | ** |
| siR_424096 | 1. 5243  | 0. 01    | -7. 25200305 | 3. 42E-13    | ** |
| siR_42412  | 13. 2937 | 6. 3027  | -1. 0767008  | 6. 87E-17    | ** |
| siR_42417  | 0. 01    | 73. 991  | 12. 85313408 | 0            | ** |
| siR_424193 | 3. 5804  | 0. 01    | -8. 48397698 | 5. 07E-30    | ** |
| siR_4242   | 0. 01    | 3. 7667  | 8. 55715732  | 2. 87E-32    | ** |
| siR_424201 | 3. 2259  | 0. 01    | -8. 33355791 | 4. 04E-27    | ** |
| siR_424224 | 1. 7016  | 0. 01    | -7. 41074813 | 1. 21E-14    | ** |
| siR_42423  | 0. 01    | 7. 4588  | 9. 54279973  | 3. 57E-63    | ** |
| siR_424247 | 2. 4815  | 0. 01    | -7. 95506863 | 5. 01E-21    | ** |
| siR_42437  | 0. 01    | 2. 3495  | 7. 87620996  | 2. 10E-20    | ** |
| siR_424392 | 4. 3603  | 0. 01    | -8. 76828358 | 2. 10E-36    | ** |
| siR_424425 | 1. 3825  | 0. 01    | -7. 11113566 | 4. 95E-12    | ** |

|            |          |          |              |             |    |
|------------|----------|----------|--------------|-------------|----|
| siR_42443  | 6.5582   | 5.5195   | -0.24876232  | 0.118045339 |    |
| siR_42448  | 2.0206   | 1.7155   | -0.23615463  | 0.412270525 |    |
| siR_42450  | 2.1979   | 0.4848   | -2.18066414  | 1.77E-08    | ** |
| siR_424503 | 4.1476   | 0.01     | -8.69613295  | 1.15E-34    | ** |
| siR_424504 | 2.8005   | 0.01     | -8.12954063  | 1.23E-23    | ** |
| siR_424536 | 1.0989   | 0.01     | -6.7799163   | 1.04E-09    | ** |
| siR_42465  | 0.01     | 1.4172   | 7.14689956   | 1.34E-12    | ** |
| siR_424693 | 2.5169   | 0.01     | -7.97550407  | 2.57E-21    | ** |
| siR_424738 | 3.4386   | 0.01     | -8.42567749  | 7.34E-29    | ** |
| siR_424818 | 1.2407   | 0.01     | -6.95501051  | 7.17E-11    | ** |
| siR_424825 | 5.1757   | 0.01     | -9.01561019  | 4.44E-43    | ** |
| siR_424826 | 3.0487   | 0.01     | -8.25205038  | 1.14E-25    | ** |
| siR_424887 | 1.1344   | 0.01     | -6.82578563  | 5.32E-10    | ** |
| siR_42494  | 1.8434   | 0.8578   | -1.10365593  | 0.001652203 | ** |
| siR_424983 | 114.2552 | 0.01     | -13.47997169 | 0           | ** |
| siR_424984 | 1.8079   | 0.01     | -7.49817107  | 1.63E-15    | ** |
| siR_42506  | 1.2407   | 0.3729   | -1.73429361  | 0.000303178 | ** |
| siR_425065 | 1.7016   | 0.01     | -7.41074813  | 1.21E-14    | ** |
| siR_42513  | 3.6513   | 3.3937   | -0.10555117  | 0.613615117 |    |
| siR_42521  | 3.3677   | 0.1492   | -4.49644418  | 6.45E-23    | ** |
| siR_425239 | 2.127    | 0.01     | -7.73267621  | 3.99E-18    | ** |
| siR_425269 | 1.6307   | 0.01     | -7.34934759  | 4.61E-14    | ** |
| siR_42531  | 7.1609   | 3.5802   | -1.00010074  | 8.31E-09    | ** |
| siR_42535  | 0.01     | 1.3053   | 7.02823761   | 1.15E-11    | ** |
| siR_425394 | 6.3101   | 0.01     | -9.30151909  | 2.30E-52    | ** |
| siR_42540  | 0.01     | 1.7155   | 7.42248532   | 4.25E-15    | ** |
| siR_425420 | 6.3101   | 0.01     | -9.30151909  | 2.30E-52    | ** |
| siR_42556  | 2.8714   | 0.8951   | -1.68163355  | 5.74E-08    | ** |
| siR_42561  | 0.01     | 3.3192   | 8.37469175   | 1.60E-28    | ** |
| siR_42579  | 0.01     | 1.5663   | 7.29121675   | 7.54E-14    | ** |
| siR_4260   | 279.8065 | 119.7506 | -1.22439659  | 0           | ** |
| siR_4261   | 3.155    | 1.1188   | -1.49568785  | 1.70E-07    | ** |
| siR_42610  | 0.01     | 1.268    | 6.98641094   | 2.37E-11    | ** |
| siR_42625  | 0.01     | 2.6479   | 8.04870483   | 6.67E-23    | ** |
| siR_42627  | 1.8434   | 0.3729   | -2.30550845  | 9.97E-08    | ** |
| siR_4265   | 28.6436  | 9.6964   | -1.56269171  | 3.82E-60    | ** |
| siR_42653  | 1.4534   | 2.4614   | 0.76004732   | 0.007413163 |    |
| siR_42657  | 0.01     | 2.0885   | 7.70632333   | 3.21E-18    | ** |
| siR_4267   | 2.5878   | 1.4545   | -0.83120283  | 0.00314582  |    |
| siR_42688  | 1.737    | 1.268    | -0.45404301  | 0.159418817 |    |
| siR_4269   | 0.01     | 3.0954   | 8.27398204   | 1.20E-26    | ** |
| siR_42695  | 0.01     | 1.0069   | 6.6537766    | 3.63E-09    | ** |
| siR_42697  | 1.028    | 0.5594   | -0.87788811  | 0.053501766 |    |
| siR_42707  | 16.6615  | 8.3165   | -1.00246989  | 1.16E-18    | ** |
| siR_4273   | 2.4106   | 2.0139   | -0.25940023  | 0.326361174 |    |
| siR_42744  | 0.01     | 8.5776   | 9.74443023   | 1.54E-72    | ** |
| siR_42749  | 0.01     | 1.1561   | 6.85312238   | 2.05E-10    | ** |

|           |         |         |             |             |    |
|-----------|---------|---------|-------------|-------------|----|
| siR_42765 | 1.4534  | 0.2984  | -2.28411237 | 2.74E-06    | ** |
| siR_42789 | 5.7074  | 3.3937  | -0.74997464 | 5.64E-05    |    |
| siR_42792 | 1.0989  | 0.3356  | -1.71124549 | 0.000775199 | ** |
| siR_42799 | 1.4889  | 0.8951  | -0.73412609 | 0.045190204 |    |
| siR_42802 | 0.01    | 1.1934  | 6.89893387  | 9.98E-11    | ** |
| siR_42806 | 0.01    | 2.6106  | 8.02823761  | 1.37E-22    | ** |
| siR_42808 | 1.3116  | 0.4102  | -1.67692841 | 0.000282277 | ** |
| siR_42809 | 6.0974  | 1.7528  | -1.7985328  | 8.98E-17    | ** |
| siR_42821 | 1.3116  | 0.7459  | -0.81427367 | 0.04007629  |    |
| siR_42830 | 0.01    | 2.9089  | 8.18432989  | 4.35E-25    | ** |
| siR_42831 | 0.01    | 53.1811 | 12.3766979  | 0           | ** |
| siR_42836 | 0.01    | 14.7684 | 10.52829782 | 2.32E-124   | ** |
| siR_42837 | 0.01    | 7.7944  | 9.60629416  | 5.54E-66    | ** |
| siR_42842 | 0.01    | 2.9089  | 8.18432989  | 4.35E-25    | ** |
| siR_4285  | 2.7651  | 1.1561  | -1.25806546 | 1.80E-05    | ** |
| siR_42851 | 0.01    | 106.735 | 13.38174571 | 0           | ** |
| siR_42867 | 0.01    | 1.1188  | 6.80580835  | 4.20E-10    | ** |
| siR_42869 | 0.01    | 2.0885  | 7.70632333  | 3.21E-18    | ** |
| siR_42875 | 0.01    | 6.974   | 9.44584255  | 4.08E-59    | ** |
| siR_42889 | 3.9349  | 2.3868  | -0.72124929 | 0.001246308 |    |
| siR_4289  | 1.737   | 1.0069  | -0.78667734 | 0.021426921 |    |
| siR_42895 | 5.0693  | 4.7363  | -0.09802608 | 0.57933751  |    |
| siR_42897 | 21.8726 | 5.1838  | -2.07704276 | 1.11E-67    | ** |
| siR_42899 | 2.9069  | 1.8274  | -0.66968898 | 0.009442737 |    |
| siR_42911 | 2.1979  | 0.4475  | -2.29616616 | 6.09E-09    | ** |
| siR_42914 | 2.5524  | 3.6175  | 0.50313858  | 0.02441821  |    |
| siR_42917 | 32.614  | 29.3503 | -0.15211614 | 0.029823089 |    |
| siR_42922 | 0.01    | 28.3806 | 11.47068937 | 2.63E-238   | ** |
| siR_42923 | 0.01    | 4.2888  | 8.74443023  | 1.22E-36    | ** |
| siR_42934 | 0.01    | 63.6233 | 12.63533949 | 0           | ** |
| siR_42935 | 0.01    | 3.6548  | 8.51364865  | 2.48E-31    | ** |
| siR_42936 | 0.01    | 1.6036  | 7.32517051  | 3.67E-14    | ** |
| siR_42943 | 2.8005  | 1.5663  | -0.83832386 | 0.001962838 |    |
| siR_42948 | 0.01    | 2.536   | 7.98641094  | 5.76E-22    | ** |
| siR_42957 | 1.1698  | 0.5221  | -1.16386383 | 0.009288174 | ** |
| siR_42968 | 1.0989  | 0.4848  | -1.1805985  | 0.010852128 | *  |
| siR_42978 | 1.2407  | 1.3426  | 0.11387523  | 0.738692997 |    |
| siR_42983 | 0.01    | 1.9393  | 7.59939219  | 5.69E-17    | ** |
| siR_42988 | 10.7768 | 5.8551  | -0.88016314 | 2.05E-10    |    |
| siR_42999 | 0.01    | 1.6036  | 7.32517051  | 3.67E-14    | ** |
| siR_43009 | 0.01    | 1.3426  | 7.06888574  | 5.63E-12    | ** |
| siR_43011 | 0.01    | 1.8647  | 7.54279973  | 2.40E-16    | ** |
| siR_43013 | 0.01    | 5.4076  | 9.07884463  | 5.28E-46    | ** |
| siR_43020 | 38.1442 | 25.9192 | -0.55744252 | 1.03E-15    |    |
| siR_43025 | 27.1192 | 18.1248 | -0.58134954 | 2.15E-12    |    |
| siR_43032 | 0.01    | 3.5056  | 8.45351758  | 4.40E-30    | ** |
| siR_43034 | 1.6661  | 1.268   | -0.39392025 | 0.2272645   |    |

|           |         |         |             |             |    |
|-----------|---------|---------|-------------|-------------|----|
| siR_43045 | 13.5773 | 5.8178  | -1.22265101 | 9.53E-21    | ** |
| siR_43050 | 38.1087 | 28.1569 | -0.43663189 | 1.40E-10    |    |
| siR_43056 | 0.01    | 1.7155  | 7.42248532  | 4.25E-15    | ** |
| siR_43063 | 0.01    | 1.529   | 7.2564446   | 1.55E-13    | ** |
| siR_43079 | 2.0561  | 0.7832  | -1.39245776 | 6.63E-05    | ** |
| siR_43082 | 2.2333  | 0.2611  | -3.0965027  | 5.26E-12    | ** |
| siR_4309  | 27.4737 | 22.0034 | -0.32032475 | 4.55E-05    |    |
| siR_43103 | 0.01    | 1.1561  | 6.85312238  | 2.05E-10    | ** |
| siR_43141 | 1.7016  | 0.2238  | -2.92661    | 5.36E-09    | ** |
| siR_43143 | 21.3409 | 3.0954  | -2.78542326 | 1.16E-92    | ** |
| siR_43145 | 7.9762  | 1.3053  | -2.61132016 | 2.55E-33    | ** |
| siR_43147 | 1.1698  | 0.0746  | -3.97094245 | 4.33E-08    | ** |
| siR_43149 | 4.1831  | 0.634   | -2.72201774 | 6.32E-19    | ** |
| siR_43164 | 0.01    | 1.1934  | 6.89893387  | 9.98E-11    | ** |
| siR_43175 | 0.01    | 4.2515  | 8.73182813  | 2.51E-36    | ** |
| siR_43176 | 0.01    | 1.3426  | 7.06888574  | 5.63E-12    | ** |
| siR_43183 | 14.9599 | 8.4657  | -0.82139926 | 1.60E-12    |    |
| siR_43188 | 2.6233  | 0.5967  | -2.13630512 | 1.16E-09    | ** |
| siR_4319  | 1.2053  | 1.4172  | 0.23365109  | 0.493306632 |    |
| siR_43196 | 0.01    | 1.1934  | 6.89893387  | 9.98E-11    | ** |
| siR_4324  | 1.5243  | 1.268   | -0.26559212 | 0.42675703  |    |
| siR_43245 | 6.8064  | 9.6218  | 0.49941487  | 0.000261501 |    |
| siR_43248 | 22.5816 | 16.9687 | -0.41227167 | 2.85E-06    |    |
| siR_43251 | 8.9334  | 6.974   | -0.357223   | 0.010085386 |    |
| siR_43257 | 15.9879 | 2.2749  | -2.81310542 | 1.48E-70    | ** |
| siR_43258 | 4.7148  | 0.5967  | -2.98211889 | 4.16E-23    | ** |
| siR_43262 | 0.01    | 5.706   | 9.15633594  | 1.68E-48    | ** |
| siR_43269 | 1.9852  | 0.3356  | -2.56446974 | 3.95E-09    | ** |
| siR_43291 | 1.2053  | 0.2611  | -2.20671792 | 3.06E-05    | ** |
| siR_43294 | 0.01    | 1.6409  | 7.35834351  | 1.79E-14    | ** |
| siR_43304 | 2.5524  | 2.1258  | -0.26384857 | 0.304432269 |    |
| siR_43305 | 0.01    | 1.902   | 7.57137344  | 1.17E-16    | ** |
| siR_43307 | 0.709   | 1.0815  | 0.60917613  | 0.145996817 |    |
| siR_43310 | 0.01    | 2.8716  | 8.16571099  | 8.93E-25    | ** |
| siR_43312 | 1.3471  | 1.268   | -0.08730221 | 0.802228468 |    |
| siR_43313 | 16.7678 | 15.3651 | -0.12603626 | 0.195139591 |    |
| siR_43314 | 1.3116  | 0.634   | -1.04877306 | 0.011177638 | *  |
| siR_43318 | 0.01    | 5.072   | 8.98641094  | 3.41E-43    | ** |
| siR_43330 | 1.5243  | 0.2611  | -2.54547251 | 3.07E-07    | ** |
| siR_43332 | 33.5002 | 16.4466 | -1.02638034 | 2.90E-37    | ** |
| siR_43339 | 0.01    | 5.967   | 9.22086197  | 1.10E-50    | ** |
| siR_43341 | 1.028   | 0.634   | -0.69728552 | 0.113380175 |    |
| siR_43352 | 0.01    | 1.9393  | 7.59939219  | 5.69E-17    | ** |
| siR_43368 | 0.01    | 3.0954  | 8.27398204  | 1.20E-26    | ** |
| siR_4337  | 3.1905  | 1.6036  | -0.99246821 | 0.000138718 |    |
| siR_43428 | 1.028   | 1.3053  | 0.34454116  | 0.342702363 |    |
| siR_43429 | 3.3677  | 1.7155  | -0.9731345  | 0.000116767 |    |

|           |          |          |              |              |    |
|-----------|----------|----------|--------------|--------------|----|
| siR_43438 | 1. 5243  | 0. 5967  | -1. 35306919 | 0. 000806564 | ** |
| siR_43439 | 1. 3825  | 0. 5594  | -1. 30532732 | 0. 001931693 | ** |
| siR_43440 | 1. 8788  | 0. 2611  | -2. 84713714 | 1. 41E-09    | ** |
| siR_43442 | 2. 0206  | 0. 4475  | -2. 17482417 | 7. 15E-08    | ** |
| siR_43451 | 1. 8079  | 1. 1561  | -0. 64504869 | 0. 048445034 |    |
| siR_43458 | 0. 01    | 1. 1188  | 6. 80580835  | 4. 20E-10    | ** |
| siR_43460 | 0. 01    | 1. 4545  | 7. 18437949  | 6. 51E-13    | ** |
| siR_43463 | 0. 01    | 2. 0139  | 7. 65384824  | 1. 35E-17    | ** |
| siR_43468 | 0. 01    | 27. 0381 | 11. 40077806 | 4. 55E-227   | ** |
| siR_43469 | 0. 01    | 1. 0815  | 6. 75688986  | 8. 62E-10    | ** |
| siR_43481 | 0. 9926  | 1. 0069  | 0. 02063605  | 0. 954446317 |    |
| siR_43499 | 39. 8812 | 3. 2819  | -3. 60310563 | 7. 71E-219   | ** |
| siR_43552 | 1. 5598  | 0. 3729  | -2. 06450035 | 4. 98E-06    | ** |
| siR_43570 | 2. 446   | 0. 5594  | -2. 12847225 | 4. 66E-09    | ** |
| siR_43574 | 0. 01    | 1. 4918  | 7. 22091032  | 3. 17E-13    | ** |
| siR_43580 | 0. 01    | 4. 065   | 8. 66711154  | 9. 14E-35    | ** |
| siR_43586 | 0. 01    | 1. 1188  | 6. 80580835  | 4. 20E-10    | ** |
| siR_43589 | 1. 2407  | 0. 4848  | -1. 35569271 | 0. 002535804 | ** |
| siR_43594 | 49. 1691 | 33. 6764 | -0. 54601403 | 3. 85E-19    |    |
| siR_43595 | 5. 1402  | 4. 1396  | -0. 31233312 | 0. 085948439 |    |
| siR_43639 | 2. 6587  | 1. 4545  | -0. 8701977  | 0. 001852485 |    |
| siR_43694 | 0. 01    | 4. 9974  | 8. 96503389  | 1. 43E-42    | ** |
| siR_43704 | 0. 4254  | 1. 1188  | 1. 39506022  | 0. 003209893 | ** |
| siR_43728 | 20. 9155 | 3. 6548  | -2. 51670812 | 2. 13E-81    | ** |
| siR_43767 | 1. 6307  | 1. 0069  | -0. 69557098 | 0. 045385302 |    |
| siR_43773 | 1. 9497  | 0. 9696  | -1. 00779055 | 0. 002643244 | ** |
| siR_43816 | 15. 6334 | 12. 4562 | -0. 32776756 | 0. 001679906 |    |
| siR_43818 | 10. 4932 | 6. 5637  | -0. 6768735  | 5. 78E-07    |    |
| siR_43847 | 5. 1048  | 4. 3261  | -0. 23878742 | 0. 185242147 |    |
| siR_43857 | 1. 3116  | 0. 5967  | -1. 13625012 | 0. 006797934 | ** |
| siR_43860 | 1. 1698  | 0. 0373  | -4. 97094246 | 4. 79E-09    | ** |
| siR_43865 | 4. 0413  | 1. 1188  | -1. 85286729 | 5. 23E-12    | ** |
| siR_43866 | 21. 0218 | 7. 0485  | -1. 57649803 | 3. 78E-45    | ** |
| siR_43868 | 1. 3116  | 0. 4475  | -1. 55136822 | 0. 000594069 | ** |
| siR_43883 | 5. 5302  | 3. 8786  | -0. 51179566 | 0. 004801607 |    |
| siR_439   | 1. 4889  | 0. 7459  | -0. 99719273 | 0. 009388402 |    |
| siR_43927 | 1. 4534  | 0. 5221  | -1. 47703375 | 0. 000479018 | ** |
| siR_43940 | 2. 9778  | 1. 3426  | -1. 14921731 | 3. 39E-05    | ** |
| siR_43950 | 1. 028   | 0. 4102  | -1. 32544087 | 0. 007079856 | ** |
| siR_43963 | 1. 3116  | 0. 5221  | -1. 32892974 | 0. 002215935 | ** |
| siR_43970 | 3. 155   | 1. 6409  | -0. 94315268 | 0. 000281202 |    |
| siR_43974 | 1. 8079  | 0. 8578  | -1. 07560166 | 0. 002277255 | ** |
| siR_43978 | 39. 2431 | 25. 2107 | -0. 63840283 | 3. 95E-20    |    |
| siR_43981 | 1. 3471  | 0. 7459  | -0. 85280282 | 0. 030399374 |    |
| siR_43983 | 5. 2111  | 1. 8647  | -1. 4826444  | 2. 19E-11    | ** |
| siR_43986 | 1. 028   | 0. 5221  | -0. 9774422  | 0. 034659916 |    |
| siR_440   | 1. 0989  | 0. 2611  | -2. 07338574 | 0. 000132441 | ** |



|           |          |         |             |             |    |
|-----------|----------|---------|-------------|-------------|----|
| siR_44073 | 0.01     | 3.0581  | 8.25649177  | 2.46E-26    | ** |
| siR_44130 | 2.446    | 2.536   | 0.05213034  | 0.831108773 |    |
| siR_44144 | 2.3751   | 1.1188  | -1.0860361  | 0.00041126  | ** |
| siR_44147 | 1.7725   | 0.2238  | -2.98550369 | 1.76E-09    | ** |
| siR_44153 | 1.1344   | 0.5221  | -1.11953137 | 0.013060942 | *  |
| siR_44157 | 1.1344   | 0.5594  | -1.01997728 | 0.02136103  | *  |
| siR_44226 | 1.8079   | 0.7459  | -1.27726075 | 0.000470054 | ** |
| siR_44227 | 1.737    | 0.5967  | -1.54152007 | 7.89E-05    | ** |
| siR_44237 | 1.2407   | 0.4848  | -1.35569271 | 0.002535804 | ** |
| siR_4429  | 2.3751   | 1.0815  | -1.13495459 | 0.000251908 | ** |
| siR_44301 | 1.8788   | 0.4475  | -2.06985191 | 4.88E-07    | ** |
| siR_44307 | 1.3116   | 0.2984  | -2.13600837 | 1.97E-05    | ** |
| siR_44320 | 5.4593   | 2.2003  | -1.31101574 | 4.32E-10    | ** |
| siR_44322 | 139.3183 | 19.6912 | -2.82276184 | 0           | ** |
| siR_44323 | 1.5952   | 0.1492  | -3.41841787 | 1.28E-09    | ** |
| siR_44365 | 2.7296   | 0.8951  | -1.60856878 | 2.99E-07    | ** |
| siR_44384 | 4.0058   | 0.634   | -2.65953565 | 9.12E-18    | ** |
| siR_44402 | 1.0989   | 0.5967  | -0.88098242 | 0.045030158 |    |
| siR_44453 | 1.2053   | 0.2984  | -2.01407284 | 8.31E-05    | ** |
| siR_44454 | 2.5878   | 0.5221  | -2.30932806 | 2.29E-10    | ** |
| siR_44457 | 5.4593   | 1.5663  | -1.80135541 | 3.39E-15    | ** |
| siR_44459 | 0.01     | 3.5802  | 8.48389637  | 1.05E-30    | ** |
| siR_44495 | 1.1698   | 0.4848  | -1.27080029 | 0.005319168 | ** |
| siR_44518 | 2.7651   | 1.8274  | -0.5975392  | 0.022212355 |    |
| siR_44522 | 3.1196   | 0.8951  | -1.80124028 | 2.90E-09    | ** |
| siR_44523 | 4.6085   | 1.3053  | -1.81991583 | 3.28E-13    | ** |
| siR_44528 | 0.01     | 7.4215  | 9.535567    | 7.33E-63    | ** |
| siR_44530 | 0.01     | 3.2446  | 8.34189682  | 6.75E-28    | ** |
| siR_44573 | 9.0752   | 2.6852  | -1.75689989 | 1.60E-23    | ** |
| siR_44600 | 4.6085   | 0.8205  | -2.48972201 | 6.74E-19    | ** |
| siR_4462  | 1.2053   | 1.1188  | -0.10744012 | 0.77139317  |    |
| siR_44637 | 1.8434   | 0.5221  | -1.81997109 | 4.74E-06    | ** |
| siR_44639 | 3.1196   | 1.7901  | -0.80132087 | 0.001658621 |    |
| siR_44642 | 1.4889   | 0.2611  | -2.5115725  | 5.19E-07    | ** |
| siR_44669 | 2.3397   | 1.268   | -0.88376881 | 0.003116844 |    |
| siR_4468  | 2.3397   | 1.9766  | -0.24330261 | 0.363297792 |    |
| siR_44690 | 9.0043   | 12.0459 | 0.41985616  | 0.000497259 |    |
| siR_44704 | 5.2111   | 2.0885  | -1.3191208  | 8.97E-10    | ** |
| siR_44744 | 1.2053   | 1.4172  | 0.23365109  | 0.493306632 |    |
| siR_44745 | 2.5524   | 1.9766  | -0.36883349 | 0.158468844 |    |
| siR_44747 | 2.4815   | 1.0442  | -1.24881439 | 5.43E-05    | ** |
| siR_44749 | 2.0561   | 1.268   | -0.69735569 | 0.024014279 |    |
| siR_44750 | 1.8434   | 0.1865  | -3.30512162 | 1.16E-10    | ** |
| siR_44754 | 12.2302  | 6.34    | -0.94789325 | 5.61E-13    |    |
| siR_44759 | 2.4106   | 0.6713  | -1.84436273 | 1.20E-07    | ** |
| siR_44766 | 2.9778   | 2.0512  | -0.53777869 | 0.030844904 |    |
| siR_44769 | 0.01     | 1.0069  | 6.6537766   | 3.63E-09    | ** |

|           |         |         |             |             |    |
|-----------|---------|---------|-------------|-------------|----|
| siR_44771 | 2.836   | 0.8205  | -1.78928229 | 1.79E-08    | ** |
| siR_44786 | 3.7577  | 3.6175  | -0.05485688 | 0.789071117 |    |
| siR_44788 | 1.8788  | 1.529   | -0.29722309 | 0.324937651 |    |
| siR_44799 | 0.01    | 1.1561  | 6.85312238  | 2.05E-10    | ** |
| siR_44800 | 0.01    | 1.1188  | 6.80580835  | 4.20E-10    | ** |
| siR_44807 | 3.0487  | 1.3053  | -1.22381277 | 1.03E-05    | ** |
| siR_44815 | 0.01    | 5.3703  | 9.06885887  | 1.08E-45    | ** |
| siR_44853 | 4.9275  | 2.8716  | -0.77900107 | 0.00011081  |    |
| siR_44857 | 1.3825  | 0.5967  | -1.2122018  | 0.003421985 | ** |
| siR_44858 | 1.1698  | 0.4848  | -1.27080029 | 0.005319168 | ** |
| siR_44865 | 10.3159 | 7.6079  | -0.4392995  | 0.000800429 |    |
| siR_4487  | 1.7016  | 1.7901  | 0.07314824  | 0.802329433 |    |
| siR_4488  | 1.028   | 1.4918  | 0.53721387  | 0.126418891 |    |
| siR_44880 | 4.7857  | 5.4076  | 0.17625848  | 0.306885517 |    |
| siR_44886 | 0.01    | 2.797   | 8.12773644  | 3.76E-24    | ** |
| siR_44904 | 0.01    | 1.0069  | 6.6537766   | 3.63E-09    | ** |
| siR_44911 | 0.01    | 42.6642 | 12.05881028 | 0           | ** |
| siR_44918 | 16.5197 | 17.6773 | 0.09771045  | 0.29895328  |    |
| siR_44923 | 68.5602 | 75.2217 | 0.13377759  | 0.003566218 |    |
| siR_44937 | 27.9346 | 41.1724 | 0.55962439  | 5.26E-17    |    |
| siR_44938 | 2.1624  | 1.3799  | -0.6480697  | 0.029964195 |    |
| siR_44944 | 7.5508  | 9.4353  | 0.32143889  | 0.016408402 |    |
| siR_44945 | 0.7799  | 1.3426  | 0.78366849  | 0.043028294 |    |
| siR_44949 | 0.01    | 1.1561  | 6.85312238  | 2.05E-10    | ** |
| siR_44955 | 2.446   | 1.1561  | -1.08115821 | 0.000353165 | ** |
| siR_44978 | 0.01    | 2.9835  | 8.22086197  | 1.03E-25    | ** |
| siR_44982 | 1.1344  | 0.5967  | -0.92685176 | 0.033495577 |    |
| siR_45002 | 0.01    | 1.529   | 7.2564446   | 1.55E-13    | ** |
| siR_45005 | 0.01    | 1.7528  | 7.45351758  | 2.07E-15    | ** |
| siR_45027 | 2.5878  | 1.3799  | -0.9071624  | 0.001471061 |    |
| siR_45038 | 0.01    | 2.3122  | 7.85312238  | 4.30E-20    | ** |
| siR_45042 | 1.3825  | 0.6713  | -1.04224993 | 0.00950628  | ** |
| siR_45044 | 25.524  | 7.9436  | -1.68398956 | 1.11E-59    | ** |
| siR_45046 | 1.737   | 0.3729  | -2.21973705 | 4.42E-07    | ** |
| siR_45062 | 0.01    | 1.0815  | 6.75688986  | 8.62E-10    | ** |
| siR_4507  | 1.5598  | 0.2984  | -2.38604162 | 6.01E-07    | ** |
| siR_45078 | 1.1698  | 0.1865  | -2.64901436 | 5.05E-06    | ** |
| siR_45081 | 1.6661  | 0.5967  | -1.48139731 | 0.000174482 | ** |
| siR_45086 | 3.1196  | 1.268   | -1.29880631 | 2.97E-06    | ** |
| siR_45110 | 3.6868  | 2.0139  | -0.87237711 | 0.000233469 |    |
| siR_45114 | 7.6926  | 2.5733  | -1.57985163 | 1.47E-17    | ** |
| siR_45116 | 1.8079  | 0.5967  | -1.5992372  | 3.50E-05    | ** |
| siR_4512  | 53.6712 | 48.5566 | -0.14448074 | 0.008019573 |    |
| siR_45128 | 2.5878  | 1.8647  | -0.47278258 | 0.07376182  |    |
| siR_45159 | 5.7074  | 1.8274  | -1.64304122 | 4.33E-14    | ** |
| siR_4516  | 2.0206  | 2.2376  | 0.14716841  | 0.580970201 |    |
| siR_45166 | 10.2096 | 4.5499  | -1.1660196  | 6.27E-15    | ** |

|           |         |         |             |             |    |
|-----------|---------|---------|-------------|-------------|----|
| siR_45170 | 10.245  | 6.7502  | -0.60191783 | 8.59E-06    |    |
| siR_45178 | 1.2407  | 0.2238  | -2.47087237 | 6.03E-06    | ** |
| siR_45195 | 0.01    | 1.1934  | 6.89893387  | 9.98E-11    | ** |
| siR_45219 | 1.4889  | 0.4848  | -1.61878526 | 0.000157192 | ** |
| siR_45242 | 2.3751  | 3.0954  | 0.3821376   | 0.106444303 |    |
| siR_45243 | 2.1624  | 1.8647  | -0.21368987 | 0.440810144 |    |
| siR_45244 | 1.3471  | 1.8647  | 0.46908659  | 0.130464932 |    |
| siR_4525  | 0.01    | 4.2142  | 8.71911497  | 5.16E-36    | ** |
| siR_45288 | 0.01    | 1.5663  | 7.29121675  | 7.54E-14    | ** |
| siR_45296 | 1.737   | 0.1492  | -3.54127831 | 1.20E-10    | ** |
| siR_4530  | 0.01    | 1.8274  | 7.51364865  | 4.92E-16    | ** |
| siR_45307 | 3.0841  | 0.7459  | -2.04779541 | 1.28E-10    | ** |
| siR_45311 | 15.4916 | 7.7571  | -0.99789685 | 2.44E-17    |    |
| siR_45327 | 3.7222  | 2.536   | -0.55360083 | 0.013106416 |    |
| siR_45360 | 0.01    | 7.3096  | 9.51364865  | 6.33E-62    | ** |
| siR_45370 | 1.5952  | 0.5221  | -1.61133925 | 9.52E-05    | ** |
| siR_45412 | 0.01    | 3.3192  | 8.37469175  | 1.60E-28    | ** |
| siR_45413 | 0.01    | 2.3122  | 7.85312238  | 4.30E-20    | ** |
| siR_45419 | 0.01    | 12.0832 | 10.23878686 | 6.96E-102   | ** |
| siR_45467 | 1.1698  | 0.5221  | -1.16386383 | 0.009288174 | ** |
| siR_45485 | 2.0206  | 0.1865  | -3.43753622 | 6.27E-12    | ** |
| siR_45508 | 1.1344  | 0.3729  | -1.60506874 | 0.001091833 | ** |
| siR_45569 | 1.4889  | 0.4102  | -1.85984746 | 3.15E-05    | ** |
| siR_45669 | 0.01    | 1.5663  | 7.29121675  | 7.54E-14    | ** |
| siR_45673 | 4.0058  | 1.6036  | -1.32077607 | 7.83E-08    | ** |
| siR_45685 | 2.5524  | 0.2984  | -3.096535   | 1.52E-13    | ** |
| siR_45686 | 3.0132  | 0.9696  | -1.63583483 | 4.97E-08    | ** |
| siR_45724 | 10.0323 | 2.6479  | -1.92173185 | 5.43E-29    | ** |
| siR_45770 | 1.3471  | 0.3356  | -2.00504233 | 3.25E-05    | ** |
| siR_45798 | 4.573   | 1.7155  | -1.41451179 | 1.45E-09    | ** |
| siR_45801 | 0.01    | 12.307  | 10.26526341 | 9.32E-104   | ** |
| siR_45804 | 1.3116  | 0.5594  | -1.22937565 | 0.003968625 | ** |
| siR_45810 | 3.4386  | 1.0815  | -1.66878764 | 3.36E-09    | ** |
| siR_45844 | 11.4149 | 1.7155  | -2.73421719 | 2.29E-49    | ** |
| siR_45850 | 1.5598  | 0.8578  | -0.86264784 | 0.018456429 |    |
| siR_45860 | 25.2049 | 9.771   | -1.3671261  | 7.65E-44    | ** |
| siR_45862 | 1.3471  | 0.2984  | -2.17453751 | 1.21E-05    | ** |
| siR_45864 | 0.01    | 1.3426  | 7.06888574  | 5.63E-12    | ** |
| siR_45867 | 8.6498  | 2.1258  | -2.0246609  | 6.88E-27    | ** |
| siR_45869 | 8.827   | 1.1561  | -2.932657   | 2.47E-41    | ** |
| siR_45881 | 2.5169  | 0.0746  | -5.07632845 | 1.70E-18    | ** |
| siR_45885 | 0.01    | 1.8274  | 7.51364865  | 4.92E-16    | ** |
| siR_45892 | 1.8434  | 0.1865  | -3.30512162 | 1.16E-10    | ** |
| siR_45899 | 0.01    | 1.0442  | 6.70625425  | 1.77E-09    | ** |
| siR_45928 | 0.01    | 1.0069  | 6.6537766   | 3.63E-09    | ** |
| siR_45937 | 2.0561  | 1.6782  | -0.29299577 | 0.30933143  |    |
| siR_45944 | 5.9201  | 3.5056  | -0.75596016 | 3.62E-05    |    |

|           |          |         |              |              |    |
|-----------|----------|---------|--------------|--------------|----|
| siR_45947 | 3. 6513  | 0. 7086 | -2. 36536684 | 1. 86E-14    | ** |
| siR_45948 | 2. 3397  | 0. 2984 | -2. 97100412 | 4. 43E-12    | ** |
| siR_45957 | 1. 0635  | 0. 1119 | -3. 24853809 | 1. 55E-06    | ** |
| siR_45972 | 35. 0246 | 1. 1561 | -4. 92103048 | 6. 65E-238   | ** |
| siR_46017 | 1. 9852  | 0. 8578 | -1. 21057114 | 0. 000435901 | ** |
| siR_46022 | 5. 672   | 2. 797  | -1. 01997728 | 1. 90E-07    | ** |
| siR_46036 | 0. 709   | 2. 6106 | 1. 88052389  | 1. 90E-08    | ** |
| siR_46067 | 1. 2407  | 0. 1865 | -2. 73390678 | 1. 71E-06    | ** |
| siR_46095 | 3. 7222  | 0. 4475 | -3. 05619599 | 6. 07E-19    | ** |
| siR_46096 | 3. 6513  | 0. 2238 | -4. 02812827 | 4. 06E-23    | ** |
| siR_46098 | 4. 1831  | 0. 1865 | -4. 48732495 | 3. 83E-28    | ** |
| siR_46101 | 6. 5228  | 2. 2376 | -1. 54353923 | 1. 18E-14    | ** |
| siR_46164 | 2. 4106  | 1. 6782 | -0. 52247762 | 0. 058796279 |    |
| siR_46206 | 1. 0635  | 0. 6713 | -0. 66379049 | 0. 122925287 |    |
| siR_46238 | 0. 01    | 6. 5637 | 9. 35836549  | 1. 11E-55    | ** |
| siR_46250 | 0. 01    | 3. 0208 | 8. 23878686  | 5. 04E-26    | ** |
| siR_46252 | 0. 01    | 1. 4545 | 7. 18437949  | 6. 51E-13    | ** |
| siR_46273 | 0. 01    | 2. 0512 | 7. 68032436  | 6. 59E-18    | ** |
| siR_46286 | 1. 2407  | 0. 4848 | -1. 35569271 | 0. 002535804 | ** |
| siR_46314 | 17. 6541 | 2. 2749 | -2. 95612824 | 9. 75E-82    | ** |
| siR_46321 | 24. 7441 | 4. 699  | -2. 3966589  | 9. 14E-91    | ** |
| siR_46433 | 1. 6307  | 1. 3053 | -0. 32110997 | 0. 324401041 |    |
| siR_46436 | 2. 8714  | 1. 0815 | -1. 40872065 | 1. 86E-06    | ** |
| siR_46438 | 1. 7725  | 0. 7832 | -1. 17833296 | 0. 001154208 | ** |
| siR_46455 | 1. 6307  | 0. 5221 | -1. 64309333 | 6. 28E-05    | ** |
| siR_46494 | 1. 5598  | 0. 7832 | -0. 99390839 | 0. 007981012 |    |
| siR_46503 | 1. 3825  | 0. 1865 | -2. 89003194 | 1. 90E-07    | ** |
| siR_46522 | 4. 9275  | 1. 7901 | -1. 46081569 | 1. 23E-10    | ** |
| siR_46526 | 18. 3276 | 2. 5733 | -2. 83232631 | 3. 30E-81    | ** |
| siR_46531 | 0. 01    | 1. 8274 | 7. 51364865  | 4. 92E-16    | ** |
| siR_46536 | 0. 01    | 1. 268  | 6. 98641094  | 2. 37E-11    | ** |
| siR_4658  | 1. 2407  | 0. 4475 | -1. 47119473 | 0. 001326969 | ** |
| siR_46591 | 6. 1328  | 2. 2749 | -1. 43074277 | 1. 51E-12    | ** |
| siR_46600 | 1. 1344  | 0. 634  | -0. 83937469 | 0. 050540314 |    |
| siR_46632 | 2. 4106  | 0. 7086 | -1. 76634891 | 2. 76E-07    | ** |
| siR_4668  | 9. 4297  | 4. 6244 | -1. 02794568 | 1. 31E-11    | ** |
| siR_46704 | 19. 3911 | 6. 1162 | -1. 66468716 | 4. 89E-45    | ** |
| siR_46710 | 1. 9143  | 0. 4848 | -1. 98135534 | 7. 91E-07    | ** |
| siR_46730 | 0. 01    | 1. 268  | 6. 98641094  | 2. 37E-11    | ** |
| siR_46743 | 1. 3471  | 0. 5221 | -1. 36745889 | 0. 001524084 | ** |
| siR_46794 | 2. 0206  | 0. 2611 | -2. 95210939 | 1. 53E-10    | ** |
| siR_46807 | 0. 01    | 1. 1561 | 6. 85312238  | 2. 05E-10    | ** |
| siR_46826 | 1. 5598  | 0. 2611 | -2. 57868669 | 1. 81E-07    | ** |
| siR_46829 | 5. 3884  | 2. 3495 | -1. 19750318 | 7. 58E-09    | ** |
| siR_46844 | 0. 01    | 1. 529  | 7. 2564446   | 1. 55E-13    | ** |
| siR_46847 | 1. 3471  | 1. 268  | -0. 08730221 | 0. 802228468 |    |
| siR_46850 | 11. 5921 | 4. 9601 | -1. 22470083 | 5. 58E-18    | ** |

|           |         |         |             |             |    |
|-----------|---------|---------|-------------|-------------|----|
| siR_46898 | 1.1344  | 0.3729  | -1.60506874 | 0.001091833 | ** |
| siR_46927 | 1.5598  | 0.7832  | -0.99390839 | 0.007981012 |    |
| siR_46943 | 1.3471  | 0.4848  | -1.47439535 | 0.000796247 | ** |
| siR_46944 | 6.6646  | 2.7225  | -1.29158624 | 8.99E-12    | ** |
| siR_46958 | 4.7857  | 1.4545  | -1.71820667 | 9.87E-13    | ** |
| siR_4697  | 6.4519  | 3.3937  | -0.92686504 | 2.86E-07    |    |
| siR_46983 | 1.6661  | 1.0069  | -0.72655458 | 0.035558339 |    |
| siR_46984 | 13.5419 | 6.3027  | -1.10338827 | 8.27E-18    | ** |
| siR_46988 | 1.028   | 0.5967  | -0.78476258 | 0.079326488 |    |
| siR_46989 | 2.7651  | 1.268   | -1.12477691 | 8.67E-05    | ** |
| siR_46999 | 2.5878  | 1.0442  | -1.30932806 | 1.89E-05    | ** |
| siR_47008 | 32.614  | 31.5506 | -0.04782395 | 0.487062069 |    |
| siR_47012 | 45.4114 | 43.4101 | -0.06502377 | 0.265941398 |    |
| siR_47016 | 59.6977 | 45.8715 | -0.38007726 | 1.66E-12    |    |
| siR_47017 | 2.836   | 1.3053  | -1.11947611 | 7.48E-05    | ** |
| siR_47020 | 11.3085 | 6.1908  | -0.86920982 | 1.16E-10    |    |
| siR_47021 | 1.2407  | 0.5967  | -1.05607663 | 0.013149564 | *  |
| siR_47029 | 3.1196  | 2.0512  | -0.60489289 | 0.013995381 |    |
| siR_47051 | 1.5243  | 1.6782  | 0.13876779  | 0.651519675 |    |
| siR_47072 | 0.01    | 4.7363  | 8.88761665  | 2.20E-40    | ** |
| siR_47083 | 0.01    | 1.6782  | 7.39077085  | 8.72E-15    | ** |
| siR_4709  | 0.01    | 2.2749  | 7.82965932  | 8.83E-20    | ** |
| siR_47091 | 1.8434  | 1.1561  | -0.67310296 | 0.038503841 |    |
| siR_47134 | 2.1624  | 0.8951  | -1.27251264 | 0.000133458 | ** |
| siR_47141 | 0.01    | 3.1327  | 8.29126281  | 5.83E-27    | ** |
| siR_47164 | 1.8079  | 1.3053  | -0.46993346 | 0.138286244 |    |
| siR_47181 | 1.7016  | 0.9696  | -0.81143033 | 0.019405045 |    |
| siR_47193 | 2.3042  | 1.7901  | -0.36422576 | 0.185737906 |    |
| siR_47203 | 1.4889  | 0.7832  | -0.92679419 | 0.01451267  |    |
| siR_47207 | 64.5898 | 8.8014  | -2.87550142 | 3.70E-286   | ** |
| siR_47228 | 3.2259  | 1.6036  | -1.00838739 | 0.000103398 | ** |
| siR_47237 | 1.028   | 0.4848  | -1.08437866 | 0.021479092 | *  |
| siR_47256 | 0.01    | 1.7528  | 7.45351758  | 2.07E-15    | ** |
| siR_4726  | 2.7296  | 1.1934  | -1.19361187 | 4.34E-05    | ** |
| siR_47272 | 1.2407  | 0.4475  | -1.47119473 | 0.001326969 | ** |
| siR_47277 | 1.0635  | 0.5967  | -0.83374235 | 0.060029399 |    |
| siR_47295 | 0.01    | 2.0139  | 7.65384824  | 1.35E-17    | ** |
| siR_47297 | 2.4815  | 1.0069  | -1.30129204 | 3.08E-05    | ** |
| siR_47359 | 0.01    | 1.4172  | 7.14689956  | 1.34E-12    | ** |
| siR_47367 | 1.2407  | 0.1492  | -3.05583488 | 4.15E-07    | ** |
| siR_47368 | 4.8566  | 0.4848  | -3.32448506 | 3.52E-26    | ** |
| siR_47369 | 2.0561  | 0.3729  | -2.46304973 | 4.71E-09    | ** |
| siR_47370 | 61.8956 | 46.3936 | -0.41591106 | 5.38E-15    |    |
| siR_47392 | 1.2762  | 0.1492  | -3.096535   | 2.35E-07    | ** |
| siR_47409 | 0.01    | 6.5637  | 9.35836549  | 1.11E-55    | ** |
| siR_47422 | 0.01    | 1.4545  | 7.18437949  | 6.51E-13    | ** |
| siR_47449 | 0.01    | 1.6782  | 7.39077085  | 8.72E-15    | ** |

|           |         |         |             |             |    |
|-----------|---------|---------|-------------|-------------|----|
| siR_47487 | 0.01    | 1.0815  | 6.75688986  | 8.62E-10    | ** |
| siR_47536 | 5.0693  | 5.6314  | 0.15170708  | 0.367334097 |    |
| siR_47539 | 7.8699  | 7.5707  | -0.0559186  | 0.691299256 |    |
| siR_47543 | 2.1979  | 2.4987  | 0.18505195  | 0.466673918 |    |
| siR_47554 | 18.1149 | 9.3981  | -0.94673582 | 1.80E-18    |    |
| siR_47590 | 3.0841  | 4.065   | 0.39840581  | 0.054304394 |    |
| siR_47641 | 6.3455  | 1.7155  | -1.88710472 | 1.80E-18    | ** |
| siR_47658 | 0.01    | 2.536   | 7.98641094  | 5.76E-22    | ** |
| siR_4772  | 39.4912 | 6.5264  | -2.59717189 | 1.41E-157   | ** |
| siR_47721 | 2.127   | 1.3426  | -0.66379049 | 0.027915253 |    |
| siR_47723 | 6.0265  | 3.0208  | -0.9963897  | 1.38E-07    |    |
| siR_47724 | 1.2407  | 0.9696  | -0.35569271 | 0.345463017 |    |
| siR_47747 | 1.028   | 0.2984  | -1.78452082 | 0.000827671 | ** |
| siR_4776  | 1.028   | 0.0373  | -4.78452082 | 6.17E-08    | ** |
| siR_47764 | 8.0117  | 13.7987 | 0.78435205  | 6.20E-11    |    |
| siR_47768 | 32.7203 | 18.3859 | -0.83158618 | 4.25E-26    |    |
| siR_47809 | 6.9836  | 8.4657  | 0.27765844  | 0.047889514 |    |
| siR_47845 | 0.01    | 1.268   | 6.98641094  | 2.37E-11    | ** |
| siR_47861 | 39.1722 | 31.5506 | -0.31216271 | 2.01E-06    |    |
| siR_47865 | 12.053  | 2.8343  | -2.0883279  | 2.73E-38    | ** |
| siR_47879 | 0.0354  | 1.6782  | 5.56702149  | 2.14E-13    | ** |
| siR_4788  | 0.01    | 1.3426  | 7.06888574  | 5.63E-12    | ** |
| siR_4790  | 1.9497  | 2.2003  | 0.17444809  | 0.518783978 |    |
| siR_47900 | 3.0132  | 0.9696  | -1.63583483 | 4.97E-08    | ** |
| siR_47902 | 1.5598  | 0.5594  | -1.4794089  | 0.000288819 | ** |
| siR_47921 | 6.9127  | 2.9462  | -1.23039395 | 2.23E-11    | ** |
| siR_47937 | 8.6143  | 5.2957  | -0.70191217 | 2.95E-06    |    |
| siR_48    | 0.01    | 1.4545  | 7.18437949  | 6.51E-13    | ** |
| siR_48034 | 1.1698  | 0.4102  | -1.5118625  | 0.001486275 | ** |
| siR_48040 | 0.01    | 1.0069  | 6.6537766   | 3.63E-09    | ** |
| siR_48044 | 0.01    | 5.6687  | 9.14687411  | 3.45E-48    | ** |
| siR_48048 | 0.01    | 3.1327  | 8.29126281  | 5.83E-27    | ** |
| siR_48050 | 0.01    | 1.8647  | 7.54279973  | 2.40E-16    | ** |
| siR_48101 | 0.01    | 1.8647  | 7.54279973  | 2.40E-16    | ** |
| siR_48146 | 1.5243  | 0.5594  | -1.44619471 | 0.000426884 | ** |
| siR_48168 | 3.155   | 0.8578  | -1.87892678 | 7.98E-10    | ** |
| siR_48172 | 5.672   | 2.8716  | -0.98200273 | 4.46E-07    |    |
| siR_48178 | 1.028   | 0.2238  | -2.19955832 | 0.000127871 | ** |
| siR_4819  | 0.01    | 4.3634  | 8.76930892  | 2.91E-37    | ** |
| siR_48194 | 1.9143  | 1.1561  | -0.72755075 | 0.023907693 |    |
| siR_48197 | 1.6307  | 2.9089  | 0.83498231  | 0.00158414  |    |
| siR_48227 | 0.01    | 1.0815  | 6.75688986  | 8.62E-10    | ** |
| siR_48254 | 1.4534  | 0.2611  | -2.47675745 | 8.75E-07    | ** |
| siR_48271 | 0.01    | 5.1838  | 9.01786625  | 3.94E-44    | ** |
| siR_48285 | 0.01    | 1.1188  | 6.80580835  | 4.20E-10    | ** |
| siR_48318 | 4.7857  | 2.0512  | -1.22226179 | 3.18E-08    | ** |
| siR_48327 | 1.5952  | 0.7459  | -1.09668318 | 0.00363773  | ** |

|           |         |         |             |             |    |
|-----------|---------|---------|-------------|-------------|----|
| siR_4837  | 3.1196  | 5.1838  | 0.732649    | 0.000161661 |    |
| siR_484   | 1.3116  | 0.4848  | -1.4358662  | 0.001178471 | ** |
| siR_48491 | 6.9127  | 3.431   | -1.01062019 | 1.13E-08    | ** |
| siR_48506 | 5.991   | 3.6175  | -0.72780382 | 5.81E-05    |    |
| siR_48516 | 1.2053  | 0.6713  | -0.84436273 | 0.042610765 |    |
| siR_48558 | 1.1698  | 0.3729  | -1.64940119 | 0.000716423 | ** |
| siR_48560 | 18.1504 | 12.3443 | -0.55615631 | 3.38E-08    |    |
| siR_48565 | 1.7016  | 1.2307  | -0.46741281 | 0.152751652 |    |
| siR_48606 | 5.6365  | 3.804   | -0.56728235 | 0.001774789 |    |
| siR_48608 | 8.5789  | 6.3773  | -0.42784693 | 0.002857136 |    |
| siR_48611 | 1.9497  | 1.3053  | -0.57887073 | 0.062635311 |    |
| siR_48617 | 1.8079  | 1.0442  | -0.79191682 | 0.018215001 |    |
| siR_48621 | 3.8286  | 2.9462  | -0.37796157 | 0.076551488 |    |
| siR_48639 | 3.2259  | 1.3799  | -1.225138   | 5.58E-06    | ** |
| siR_48719 | 1.9497  | 0.7086  | -1.46020878 | 5.73E-05    | ** |
| siR_48793 | 0.01    | 1.1934  | 6.89893387  | 9.98E-11    | ** |
| siR_48810 | 5.6365  | 2.6106  | -1.11041817 | 2.63E-08    | ** |
| siR_48820 | 1.8079  | 0.6713  | -1.42928533 | 0.000138786 | ** |
| siR_48837 | 3.0132  | 1.1188  | -1.42934428 | 7.85E-07    | ** |
| siR_48862 | 12.7265 | 9.137   | -0.47804325 | 5.67E-05    |    |
| siR_48874 | 1.418   | 0.8578  | -0.72514431 | 0.053278736 |    |
| siR_48879 | 3.0487  | 0.8951  | -1.76807342 | 6.89E-09    | ** |
| siR_48892 | 2.127   | 0.4102  | -2.37442064 | 5.43E-09    | ** |
| siR_48927 | 0.01    | 2.6852  | 8.06888574  | 3.25E-23    | ** |
| siR_48934 | 3.7577  | 2.4614  | -0.61037076 | 0.006504656 |    |
| siR_48938 | 7.9053  | 3.0581  | -1.37018463 | 7.37E-15    | ** |
| siR_48948 | 0.01    | 1.7155  | 7.42248532  | 4.25E-15    | ** |
| siR_48950 | 1.3471  | 0.634   | -1.08730221 | 0.008088456 | ** |
| siR_48955 | 1.7725  | 1.4172  | -0.32274226 | 0.301459607 |    |
| siR_48956 | 51.2606 | 18.2367 | -1.49100567 | 2.98E-99    | ** |
| siR_48996 | 2.3397  | 2.4241  | 0.05112566  | 0.837700405 |    |
| siR_48997 | 16.8742 | 7.3469  | -1.19961156 | 1.05E-24    | ** |
| siR_49015 | 3.2259  | 4.5126  | 0.48425719  | 0.015177842 |    |
| siR_49017 | 2.0915  | 2.0512  | -0.02806983 | 0.920066067 |    |
| siR_49033 | 0.01    | 1.268   | 6.98641094  | 2.37E-11    | ** |
| siR_49039 | 0.01    | 5.9297  | 9.21181531  | 2.25E-50    | ** |
| siR_49050 | 0.01    | 1.1561  | 6.85312238  | 2.05E-10    | ** |
| siR_4906  | 4.8921  | 2.8343  | -0.78746142 | 0.000101244 |    |
| siR_49066 | 1.8079  | 0.8578  | -1.07560166 | 0.002277255 | ** |
| siR_49091 | 2.446   | 0.3729  | -2.7135637  | 1.42E-11    | ** |
| siR_49100 | 1.4534  | 0.634   | -1.19687707 | 0.002948104 | ** |
| siR_49170 | 1.8434  | 0.6713  | -1.45733961 | 9.44E-05    | ** |
| siR_49225 | 0.01    | 2.5733  | 8.00747585  | 2.81E-22    | ** |
| siR_49244 | 6.3455  | 2.7225  | -1.2208018  | 1.90E-10    | ** |
| siR_49253 | 1.4534  | 1.0442  | -0.47703375 | 0.178870443 |    |
| siR_49282 | 1.6307  | 1.3426  | -0.28046185 | 0.386202334 |    |
| siR_49283 | 2.127   | 1.1188  | -0.92686787 | 0.0033742   |    |

|           |          |          |              |              |    |
|-----------|----------|----------|--------------|--------------|----|
| siR_49284 | 1. 1698  | 1. 3426  | 0. 19876765  | 0. 567969601 |    |
| siR_49286 | 11. 5212 | 14. 6938 | 0. 35091655  | 0. 001140833 |    |
| siR_49289 | 0. 01    | 22. 6747 | 11. 14686775 | 1. 52E-190   | ** |
| siR_49301 | 1. 418   | 0. 5221  | -1. 44145947 | 0. 000708453 | ** |
| siR_49331 | 1. 5598  | 1. 1188  | -0. 4794089  | 0. 1615353   |    |
| siR_49336 | 0. 01    | 2. 6852  | 8. 06888574  | 3. 25E-23    | ** |
| siR_49339 | 7. 8699  | 4. 1396  | -0. 92685393 | 1. 42E-08    |    |
| siR_49342 | 8. 5434  | 5. 5195  | -0. 63027275 | 2. 31E-05    |    |
| siR_49346 | 1. 5952  | 0. 9323  | -0. 77487114 | 0. 029704074 |    |
| siR_49359 | 1. 4534  | 0. 5967  | -1. 28435413 | 0. 001680536 | ** |
| siR_49373 | 3. 2614  | 0. 8951  | -1. 86537062 | 5. 01E-10    | ** |
| siR_49414 | 0. 01    | 9. 9202  | 9. 9542254   | 8. 89E-84    | ** |
| siR_49417 | 0. 01    | 2. 2376  | 7. 80580835  | 1. 81E-19    | ** |
| siR_49421 | 0. 01    | 1. 4918  | 7. 22091032  | 3. 17E-13    | ** |
| siR_49423 | 0. 01    | 5. 9297  | 9. 21181531  | 2. 25E-50    | ** |
| siR_49431 | 0. 01    | 4. 0277  | 8. 65381242  | 1. 88E-34    | ** |
| siR_49433 | 0. 01    | 1. 0069  | 6. 6537766   | 3. 63E-09    | ** |
| siR_4944  | 0. 9926  | 1. 0069  | 0. 02063605  | 0. 954446317 |    |
| siR_49456 | 1. 4534  | 0. 8205  | -0. 82485657 | 0. 028682588 |    |
| siR_49477 | 1. 737   | 0. 8205  | -1. 08202252 | 0. 002661787 | ** |
| siR_49484 | 17. 9731 | 4. 0277  | -2. 15781113 | 1. 30E-58    | ** |
| siR_49485 | 1. 8788  | 0. 2984  | -2. 65449206 | 5. 42E-09    | ** |
| siR_49487 | 1. 0635  | 0. 2611  | -2. 02614567 | 0. 000213675 | ** |
| siR_49494 | 2. 3397  | 0. 9323  | -1. 32745738 | 4. 00E-05    | ** |
| siR_49495 | 2. 3751  | 0. 7832  | -1. 60053559 | 1. 96E-06    | ** |
| siR_49496 | 1. 4534  | 0. 2984  | -2. 28411237 | 2. 74E-06    | ** |
| siR_49507 | 1. 0635  | 0. 4848  | -1. 13335843 | 0. 015328041 | *  |
| siR_49514 | 46. 2976 | 23. 9427 | -0. 95135156 | 4. 74E-45    |    |
| siR_49517 | 1. 0635  | 0. 2238  | -2. 24853809 | 7. 77E-05    | ** |
| siR_4955  | 1. 0635  | 1. 0069  | -0. 07889962 | 0. 841808282 |    |
| siR_49555 | 1. 4534  | 0. 3356  | -2. 11461719 | 7. 80E-06    | ** |
| siR_49559 | 1. 5952  | 0. 5967  | -1. 41865963 | 0. 000378908 | ** |
| siR_49564 | 0. 9217  | 1. 0069  | 0. 12755125  | 0. 746667492 |    |
| siR_49568 | 1. 028   | 0. 3356  | -1. 61502564 | 0. 001825058 | ** |
| siR_49588 | 0. 01    | 2. 163   | 7. 75688986  | 7. 63E-19    | ** |
| siR_4960  | 1. 1344  | 0. 7832  | -0. 53447677 | 0. 189070882 |    |
| siR_49652 | 2. 5169  | 0. 4475  | -2. 49168831 | 6. 27E-11    | ** |
| siR_49665 | 8. 0826  | 7. 6079  | -0. 08732117 | 0. 531453734 |    |
| siR_49692 | 1. 1698  | 1. 1188  | -0. 06430974 | 0. 864211392 |    |
| siR_4973  | 0. 01    | 1. 4545  | 7. 18437949  | 6. 51E-13    | ** |
| siR_49780 | 3. 6513  | 2. 0512  | -0. 83194204 | 0. 000436453 |    |
| siR_49789 | 0. 01    | 1. 3426  | 7. 06888574  | 5. 63E-12    | ** |
| siR_49793 | 0. 01    | 1. 529   | 7. 2564446   | 1. 55E-13    | ** |
| siR_49808 | 3. 0841  | 1. 6782  | -0. 87793488 | 0. 000723099 |    |
| siR_49810 | 3. 155   | 1. 9393  | -0. 70210401 | 0. 004796721 |    |
| siR_49824 | 5. 9201  | 1. 4918  | -1. 98856741 | 1. 81E-18    | ** |
| siR_49845 | 0. 5317  | 1. 0442  | 0. 97371369  | 0. 032467048 |    |



|           |          |          |              |              |    |
|-----------|----------|----------|--------------|--------------|----|
| siR_49852 | 1. 0635  | 0. 2611  | -2. 02614567 | 0. 000213675 | ** |
| siR_49854 | 0. 01    | 3. 3937  | 8. 40671523  | 3. 81E-29    | ** |
| siR_49878 | 2. 5169  | 2. 0885  | -0. 26918075 | 0. 298578358 |    |
| siR_49892 | 4. 5376  | 0. 4102  | -3. 46753004 | 2. 03E-25    | ** |
| siR_49899 | 1. 0635  | 0. 1492  | -2. 83350059 | 6. 84E-06    | ** |
| siR_4993  | 4. 8921  | 2. 4987  | -0. 9692762  | 3. 56E-06    |    |
| siR_49943 | 1. 418   | 0. 9323  | -0. 60499136 | 0. 099700314 |    |
| siR_49975 | 4. 8212  | 0. 6713  | -2. 84436273 | 1. 47E-22    | ** |
| siR_49984 | 0. 01    | 5. 706   | 9. 15633594  | 1. 68E-48    | ** |
| siR_50006 | 3. 7577  | 0. 4475  | -3. 06989031 | 3. 45E-19    | ** |
| siR_50035 | 1. 2762  | 0. 4475  | -1. 51189485 | 0. 000890445 | ** |
| siR_50056 | 22. 7943 | 8. 1301  | -1. 4873281  | 5. 88E-45    | ** |
| siR_50140 | 1. 0989  | 0. 2238  | -2. 29577817 | 4. 70E-05    | ** |
| siR_5016  | 1. 0989  | 0. 5221  | -1. 07366204 | 0. 018227899 | *  |
| siR_50167 | 2. 2688  | 0. 0746  | -4. 92660999 | 1. 50E-16    | ** |
| siR_5018  | 0. 01    | 10. 405  | 10. 02306125 | 7. 77E-88    | ** |
| siR_50193 | 1. 6661  | 1. 3426  | -0. 31144545 | 0. 333016329 |    |
| siR_50233 | 0. 01    | 1. 8274  | 7. 51364865  | 4. 92E-16    | ** |
| siR_5024  | 2. 446   | 2. 0139  | -0. 28043236 | 0. 286735608 |    |
| siR_50245 | 0. 01    | 4. 3634  | 8. 76930892  | 2. 91E-37    | ** |
| siR_50248 | 20. 3837 | 7. 6825  | -1. 40776818 | 2. 52E-37    | ** |
| siR_50263 | 3. 8995  | 2. 9462  | -0. 40443378 | 0. 056910307 |    |
| siR_50327 | 19. 143  | 11. 2627 | -0. 76526421 | 5. 41E-14    |    |
| siR_50339 | 1. 3825  | 0. 7086  | -0. 96423611 | 0. 014998473 |    |
| siR_50342 | 66. 5396 | 43. 4846 | -0. 61370863 | 7. 00E-31    |    |
| siR_50359 | 25. 9494 | 5. 333   | -2. 28268195 | 8. 58E-90    | ** |
| siR_50371 | 1. 7725  | 1. 0815  | -0. 71275196 | 0. 032912649 |    |
| siR_50383 | 14. 7117 | 12. 0459 | -0. 28842178 | 0. 006935137 |    |
| siR_50389 | 4. 5021  | 3. 9904  | -0. 17406473 | 0. 359546242 |    |
| siR_50400 | 1. 0989  | 1. 3799  | 0. 32850361  | 0. 350747427 |    |
| siR_50471 | 0. 01    | 2. 2376  | 7. 80580835  | 1. 81E-19    | ** |
| siR_50499 | 3. 5095  | 3. 0581  | -0. 19862992 | 0. 358468191 |    |
| siR_50519 | 3. 0841  | 4. 7363  | 0. 61891092  | 0. 001895693 |    |
| siR_50522 | 4. 6085  | 0. 6713  | -2. 7792677  | 3. 84E-21    | ** |
| siR_50532 | 0. 01    | 1. 0069  | 6. 6537766   | 3. 63E-09    | ** |
| siR_50542 | 0. 01    | 3. 5429  | 8. 46878694  | 2. 15E-30    | ** |
| siR_50550 | 1. 9143  | 0. 5221  | -1. 87441888 | 1. 95E-06    | ** |
| siR_50564 | 11. 344  | 3. 17    | -1. 83937469 | 8. 41E-31    | ** |
| siR_50572 | 0. 01    | 8. 8014  | 9. 78158921  | 2. 06E-74    | ** |
| siR_50573 | 0. 01    | 2. 3495  | 7. 87620996  | 2. 10E-20    | ** |
| siR_50582 | 0. 01    | 20. 5862 | 11. 00746183 | 4. 63E-173   | ** |
| siR_50589 | 0. 01    | 9. 5845  | 9. 90455936  | 5. 73E-81    | ** |
| siR_50590 | 0. 01    | 1. 1188  | 6. 80580835  | 4. 20E-10    | ** |
| siR_50596 | 0. 01    | 30. 8047 | 11. 58893477 | 1. 34E-258   | ** |
| siR_50597 | 0. 01    | 7. 6452  | 9. 57841043  | 9. 81E-65    | ** |
| siR_50605 | 0. 01    | 5. 0347  | 8. 97576201  | 6. 99E-43    | ** |
| siR_50659 | 3. 3677  | 2. 797   | -0. 26788337 | 0. 230570699 |    |

|           |         |         |             |             |    |
|-----------|---------|---------|-------------|-------------|----|
| siR_5071  | 2.8005  | 1.6036  | -0.80437011 | 0.002806815 |    |
| siR_50778 | 2.2688  | 2.4987  | 0.13924826  | 0.580408532 |    |
| siR_50785 | 4.0767  | 1.6782  | -1.28048713 | 1.22E-07    | ** |
| siR_50807 | 18.3631 | 3.3192  | -2.46790216 | 4.14E-70    | ** |
| siR_50810 | 1.418   | 0.8205  | -0.78928229 | 0.037521829 |    |
| siR_50862 | 1.3471  | 0.5221  | -1.36745889 | 0.001524084 | ** |
| siR_50876 | 1.6307  | 0.9696  | -0.75002979 | 0.032577757 |    |
| siR_50880 | 3.0487  | 1.9393  | -0.65265819 | 0.009349617 |    |
| siR_50882 | 56.5072 | 22.1153 | -1.35338989 | 1.18E-94    | ** |
| siR_50884 | 12.0175 | 5.7433  | -1.06518498 | 3.60E-15    | ** |
| siR_50895 | 10.954  | 5.8178  | -0.91291218 | 3.83E-11    |    |
| siR_50900 | 0.01    | 4.2888  | 8.74443023  | 1.22E-36    | ** |
| siR_50908 | 0.01    | 12.4189 | 10.27832168 | 1.08E-104   | ** |
| siR_50971 | 1.1698  | 0.7086  | -0.72321852 | 0.080618428 |    |
| siR_50979 | 1.4889  | 0.7832  | -0.92679419 | 0.01451267  |    |
| siR_51002 | 2.3751  | 0.634   | -1.90543351 | 7.84E-08    | ** |
| siR_51005 | 0.01    | 1.5663  | 7.29121675  | 7.54E-14    | ** |
| siR_51046 | 1.2762  | 0.8205  | -0.6372792  | 0.102225329 |    |
| siR_51056 | 8.2244  | 7.4588  | -0.14096689 | 0.312159592 |    |
| siR_51057 | 3.7931  | 2.8716  | -0.4015226  | 0.062167128 |    |
| siR_51058 | 1.0635  | 0.9323  | -0.18995386 | 0.633240136 |    |
| siR_51059 | 1.3471  | 0.8951  | -0.58973618 | 0.116948474 |    |
| siR_51060 | 1.8434  | 0.8205  | -1.16779392 | 0.000994639 | ** |
| siR_51061 | 1.5243  | 0.7832  | -0.9606942  | 0.010795924 |    |
| siR_51087 | 1.1698  | 0.5594  | -1.06430974 | 0.015477614 | *  |
| siR_51105 | 1.4889  | 0.4475  | -1.73428727 | 7.26E-05    | ** |
| siR_51112 | 3.0132  | 1.4918  | -1.0142423  | 0.000163869 | ** |
| siR_51126 | 0.01    | 2.7597  | 8.10836763  | 7.72E-24    | ** |
| siR_51133 | 0.01    | 3.7667  | 8.55715732  | 2.87E-32    | ** |
| siR_51154 | 1.5243  | 0.7459  | -1.03109274 | 0.006885853 | ** |
| siR_5122  | 3.545   | 1.0069  | -1.81586522 | 1.90E-10    | ** |
| siR_51242 | 1.3825  | 0.7459  | -0.89022535 | 0.022894115 |    |
| siR_51245 | 1.7725  | 0.3729  | -2.24892492 | 2.70E-07    | ** |
| siR_5125  | 0.01    | 1.0442  | 6.70625425  | 1.77E-09    | ** |
| siR_51290 | 1.0635  | 0.8951  | -0.24869926 | 0.535296857 |    |
| siR_51292 | 0.01    | 3.8786  | 8.59939219  | 3.33E-33    | ** |
| siR_51334 | 2.5524  | 1.7528  | -0.54219305 | 0.044243042 |    |
| siR_51349 | 1.028   | 1.0815  | 0.0731934   | 0.844954568 |    |
| siR_51396 | 0.01    | 7.9063  | 9.62685889  | 6.41E-67    | ** |
| siR_51403 | 0.01    | 1.0815  | 6.75688986  | 8.62E-10    | ** |
| siR_51429 | 3.3677  | 1.0815  | -1.63872996 | 7.67E-09    | ** |
| siR_51430 | 2.3751  | 0.8951  | -1.40786748 | 1.50E-05    | ** |
| siR_51485 | 1.0989  | 0.2611  | -2.07338574 | 0.000132441 | ** |
| siR_51502 | 5.2111  | 2.0139  | -1.37159589 | 2.75E-10    | ** |
| siR_51503 | 2.446   | 0.7086  | -1.78738103 | 1.79E-07    | ** |
| siR_5151  | 1.1344  | 1.2307  | 0.11754969  | 0.741641213 |    |
| siR_51533 | 1.7725  | 0.7086  | -1.32274226 | 0.000375473 | ** |

|           |         |         |             |             |    |
|-----------|---------|---------|-------------|-------------|----|
| siR_51544 | 13.9673 | 7.3469  | -0.92684562 | 3.95E-14    |    |
| siR_51550 | 0.01    | 2.3122  | 7.85312238  | 4.30E-20    | ** |
| siR_51559 | 1.028   | 0.634   | -0.69728552 | 0.113380175 |    |
| siR_51565 | 4.0413  | 1.3799  | -1.55025573 | 1.17E-09    | ** |
| siR_51590 | 2.836   | 2.6106  | -0.11947611 | 0.61584915  |    |
| siR_51639 | 2.3397  | 1.6782  | -0.4794089  | 0.085307096 |    |
| siR_51665 | 1.6307  | 0.7832  | -1.05803872 | 0.004283913 | ** |
| siR_51711 | 10.5286 | 10.1066 | -0.05901588 | 0.627561097 |    |
| siR_51713 | 1.3116  | 0.5967  | -1.13625012 | 0.006797934 | ** |
| siR_51721 | 0.01    | 1.268   | 6.98641094  | 2.37E-11    | ** |
| siR_51731 | 0.01    | 1.0442  | 6.70625425  | 1.77E-09    | ** |
| siR_51794 | 3.1905  | 0.5594  | -2.51183038 | 1.28E-13    | ** |
| siR_51795 | 2.8714  | 0.8578  | -1.7430411  | 2.62E-08    | ** |
| siR_51799 | 1.418   | 1.0442  | -0.44145947 | 0.216543272 |    |
| siR_51819 | 9.7487  | 5.4449  | -0.84030429 | 6.16E-09    |    |
| siR_51836 | 0.01    | 1.3799  | 7.10841991  | 2.74E-12    | ** |
| siR_51854 | 8.2598  | 3.4683  | -1.25187816 | 1.21E-13    | ** |
| siR_51857 | 3.4741  | 3.0954  | -0.16651343 | 0.441444955 |    |
| siR_51870 | 3.2614  | 1.9766  | -0.72247045 | 0.003275306 |    |
| siR_51873 | 1.5243  | 1.0815  | -0.4951132  | 0.154115399 |    |
| siR_51876 | 1.0635  | 1.3799  | 0.37574369  | 0.28994045  |    |
| siR_51878 | 1.0989  | 0.8578  | -0.35734689 | 0.373215383 |    |
| siR_51948 | 1.0989  | 0.1865  | -2.55881257 | 1.47E-05    | ** |
| siR_51994 | 2.836   | 0.7459  | -1.9268034  | 3.20E-09    | ** |
| siR_52011 | 2.3397  | 1.0815  | -1.11328989 | 0.00034804  | ** |
| siR_52019 | 2.3751  | 0.8578  | -1.46927504 | 7.85E-06    | ** |
| siR_52020 | 1.2407  | 0.5221  | -1.24875625 | 0.004597643 | ** |
| siR_52025 | 1.9852  | 1.3053  | -0.60490294 | 0.050653477 |    |
| siR_52039 | 0.01    | 2.0512  | 7.68032436  | 6.59E-18    | ** |
| siR_52048 | 1.1344  | 0.7832  | -0.53447677 | 0.189070882 |    |
| siR_52053 | 2.4106  | 1.2307  | -0.96991315 | 0.001177833 |    |
| siR_52096 | 1.5952  | 0.5221  | -1.61133925 | 9.52E-05    | ** |
| siR_52097 | 1.028   | 0.2238  | -2.19955832 | 0.000127871 | ** |
| siR_5210  | 0.01    | 3.9159  | 8.61320011  | 1.62E-33    | ** |
| siR_52137 | 1.028   | 0.634   | -0.69728552 | 0.113380175 |    |
| siR_52142 | 0.2836  | 1.0069  | 1.82799097  | 0.000698829 | ** |
| siR_52148 | 1.8788  | 0.8951  | -1.06969073 | 0.001948509 | ** |
| siR_52155 | 4.3249  | 1.9393  | -1.15713078 | 4.83E-07    | ** |
| siR_52158 | 4.5021  | 1.268   | -1.82804336 | 5.23E-13    | ** |
| siR_52161 | 6.381   | 1.7155  | -1.89515341 | 1.16E-18    | ** |
| siR_52164 | 1.0989  | 0.634   | -0.79350536 | 0.066742311 |    |
| siR_52182 | 2.836   | 1.1934  | -1.24877985 | 1.57E-05    | ** |
| siR_52237 | 1.5598  | 1.1561  | -0.43209486 | 0.203345857 |    |
| siR_52251 | 3.864   | 2.4241  | -0.67264588 | 0.002625271 |    |
| siR_52257 | 0.01    | 1.0815  | 6.75688986  | 8.62E-10    | ** |
| siR_52288 | 1.1344  | 0.8951  | -0.34180866 | 0.385445259 |    |
| siR_52289 | 1.3471  | 0.1119  | -3.58957501 | 1.39E-08    | ** |

|           |         |         |             |             |    |
|-----------|---------|---------|-------------|-------------|----|
| siR_52326 | 13.5419 | 4.8109  | -1.49305145 | 1.62E-27    | ** |
| siR_52330 | 9.2879  | 4.6617  | -0.99449628 | 6.35E-11    |    |
| siR_52338 | 2.3397  | 1.3426  | -0.80129401 | 0.006544644 |    |
| siR_52385 | 3.2614  | 2.5733  | -0.34187173 | 0.13711289  |    |
| siR_52402 | 0.01    | 1.1934  | 6.89893387  | 9.98E-11    | ** |
| siR_52407 | 1.8434  | 0.6713  | -1.45733961 | 9.44E-05    | ** |
| siR_52408 | 1.1698  | 0.5594  | -1.06430974 | 0.015477614 | *  |
| siR_52410 | 2.2333  | 1.3426  | -0.73414751 | 0.013813394 |    |
| siR_52413 | 1.4534  | 0.9696  | -0.58397021 | 0.106236151 |    |
| siR_52422 | 1.1698  | 0.8205  | -0.51168666 | 0.199636034 |    |
| siR_52448 | 1.9852  | 0.7086  | -1.48624099 | 3.88E-05    | ** |
| siR_52474 | 2.836   | 1.4918  | -0.9268034  | 0.000694835 |    |
| siR_52475 | 3.4032  | 1.4918  | -1.18983781 | 5.12E-06    | ** |
| siR_52491 | 53.7421 | 45.0883 | -0.25329958 | 5.02E-06    |    |
| siR_52492 | 1.0989  | 1.0442  | -0.07366204 | 0.849549666 |    |
| siR_52508 | 8.9334  | 5.2957  | -0.75438797 | 3.98E-07    |    |
| siR_52523 | 0.01    | 2.0885  | 7.70632333  | 3.21E-18    | ** |
| siR_52564 | 0.01    | 2.6106  | 8.02823761  | 1.37E-22    | ** |
| siR_52568 | 0.01    | 2.1258  | 7.73186206  | 1.57E-18    | ** |
| siR_52579 | 0.01    | 3.8413  | 8.58545083  | 6.83E-33    | ** |
| siR_52589 | 11.7339 | 9.3608  | -0.32597887 | 0.006794273 |    |
| siR_52604 | 11.7694 | 10.7033 | -0.1369851  | 0.239334358 |    |
| siR_5261  | 0.9571  | 1.2307  | 0.36273755  | 0.333810273 |    |
| siR_52651 | 4.0767  | 1.7901  | -1.18736161 | 6.15E-07    | ** |
| siR_52678 | 0.01    | 3.0954  | 8.27398204  | 1.20E-26    | ** |
| siR_52722 | 43.3907 | 21.8169 | -0.99193974 | 3.02E-45    |    |
| siR_52731 | 3.0841  | 4.7363  | 0.61891092  | 0.001895693 |    |
| siR_52732 | 15.1726 | 14.1344 | -0.10225769 | 0.315565091 |    |
| siR_52735 | 0.01    | 1.0442  | 6.70625425  | 1.77E-09    | ** |
| siR_52769 | 1.5952  | 0.5967  | -1.41865963 | 0.000378908 | ** |
| siR_52782 | 0.01    | 1.6782  | 7.39077085  | 8.72E-15    | ** |
| siR_52795 | 1.3116  | 0.7832  | -0.74387514 | 0.057586901 |    |
| siR_528   | 1.4534  | 0.6713  | -1.11440226 | 0.004972851 | ** |
| siR_52911 | 0.01    | 1.9393  | 7.59939219  | 5.69E-17    | ** |
| siR_52919 | 2.127   | 1.7155  | -0.31019091 | 0.27488112  |    |
| siR_52927 | 0.01    | 1.1934  | 6.89893387  | 9.98E-11    | ** |
| siR_52947 | 2.127   | 1.1561  | -0.87955384 | 0.005032018 |    |
| siR_52949 | 19.1075 | 5.2584  | -1.86144323 | 1.42E-51    | ** |
| siR_52956 | 4.3603  | 2.536   | -0.78187265 | 0.000265929 |    |
| siR_52972 | 1.028   | 0.7086  | -0.53679689 | 0.21005998  |    |
| siR_52975 | 1.6661  | 1.3426  | -0.31144545 | 0.333016329 |    |
| siR_52981 | 1.0635  | 0.5967  | -0.83374235 | 0.060029399 |    |
| siR_52988 | 2.6587  | 1.3799  | -0.94615728 | 0.00083825  |    |
| siR_53002 | 0.9217  | 1.1188  | 0.279583    | 0.470644087 |    |
| siR_53030 | 1.7725  | 1.0069  | -0.81586522 | 0.016484935 |    |
| siR_53042 | 0.01    | 1.6409  | 7.35834351  | 1.79E-14    | ** |
| siR_53056 | 0.01    | 9.0624  | 9.82374936  | 1.35E-76    | ** |

|           |         |         |             |             |    |
|-----------|---------|---------|-------------|-------------|----|
| siR_53060 | 0.01    | 35.3919 | 11.7892035  | 5.37E-297   | ** |
| siR_53066 | 0.01    | 1.9766  | 7.62687714  | 2.78E-17    | ** |
| siR_53088 | 1.1344  | 0.3356  | -1.75711482 | 0.000500636 | ** |
| siR_53091 | 4.3958  | 3.431   | -0.35749662 | 0.071493321 |    |
| siR_53092 | 1.6307  | 1.3799  | -0.24092767 | 0.453762935 |    |
| siR_53172 | 9.4297  | 3.9531  | -1.25422742 | 2.07E-15    | ** |
| siR_53183 | 1.8788  | 1.8274  | -0.04001904 | 0.891828996 |    |
| siR_53203 | 2.8005  | 1.3799  | -1.02112071 | 0.000259988 | ** |
| siR_5326  | 1.028   | 0.1119  | -3.19955832 | 2.76E-06    | ** |
| siR_53276 | 0.01    | 31.2896 | 11.6114675  | 1.17E-262   | ** |
| siR_53277 | 0.01    | 1.1188  | 6.80580835  | 4.20E-10    | ** |
| siR_53313 | 4.5376  | 4.9974  | 0.13924826  | 0.434562066 |    |
| siR_53329 | 1.2407  | 0.2611  | -2.24847995 | 1.86E-05    | ** |
| siR_53364 | 3.1905  | 1.7528  | -0.86412114 | 0.000691001 |    |
| siR_53383 | 5.1402  | 1.9766  | -1.37880355 | 3.09E-10    | ** |
| siR_534   | 32.8267 | 11.8967 | -1.46430828 | 1.48E-62    | ** |
| siR_53536 | 0.01    | 1.4172  | 7.14689956  | 1.34E-12    | ** |
| siR_53540 | 0.01    | 1.0442  | 6.70625425  | 1.77E-09    | ** |
| siR_53542 | 0.01    | 1.3426  | 7.06888574  | 5.63E-12    | ** |
| siR_53557 | 0.8153  | 1.0069  | 0.30451749  | 0.458490285 |    |
| siR_53640 | 1.3471  | 0.2238  | -2.58957501 | 1.24E-06    | ** |
| siR_53643 | 0.01    | 1.1934  | 6.89893387  | 9.98E-11    | ** |
| siR_53655 | 1.2053  | 1.0069  | -0.25947187 | 0.491104458 |    |
| siR_53685 | 6.3101  | 3.9531  | -0.67467842 | 0.000112908 |    |
| siR_53709 | 1.5243  | 0.4848  | -1.65268527 | 0.000103474 | ** |
| siR_53817 | 1.6661  | 0.9696  | -0.78101339 | 0.025220231 |    |
| siR_5388  | 1.3471  | 0.634   | -1.08730221 | 0.008088456 | ** |
| siR_53881 | 3.2968  | 1.268   | -1.37851162 | 4.91E-07    | ** |
| siR_53884 | 0.01    | 1.7901  | 7.48389637  | 1.01E-15    | ** |
| siR_53886 | 10.7768 | 7.1231  | -0.59735171 | 5.81E-06    |    |
| siR_53887 | 2.3042  | 0.6713  | -1.7792364  | 4.46E-07    | ** |
| siR_53897 | 6.4519  | 2.3495  | -1.45737031 | 1.88E-13    | ** |
| siR_5392  | 10.1741 | 1.4545  | -2.80630598 | 2.29E-45    | ** |
| siR_5393  | 8.4016  | 1.529   | -2.45807569 | 8.55E-33    | ** |
| siR_53961 | 2.9778  | 2.9835  | 0.00275892  | 0.988145003 |    |
| siR_54015 | 0.01    | 2.6479  | 8.04870483  | 6.67E-23    | ** |
| siR_54127 | 0.01    | 2.0512  | 7.68032436  | 6.59E-18    | ** |
| siR_54130 | 0.01    | 1.2307  | 6.94333532  | 4.86E-11    | ** |
| siR_54154 | 0.01    | 5.0347  | 8.97576201  | 6.99E-43    | ** |
| siR_54156 | 0.01    | 1.6409  | 7.35834351  | 1.79E-14    | ** |
| siR_5418  | 2.6587  | 4.0277  | 0.59923523  | 0.005405281 |    |
| siR_54188 | 7.8344  | 1.902   | -2.04230554 | 9.34E-25    | ** |
| siR_54194 | 1.0635  | 0.4848  | -1.13335843 | 0.015328041 | *  |
| siR_54197 | 1.1698  | 0.4848  | -1.27080029 | 0.005319168 | ** |
| siR_5420  | 1.9143  | 2.1258  | 0.15118893  | 0.580827286 |    |
| siR_54207 | 0.01    | 1.1561  | 6.85312238  | 2.05E-10    | ** |
| siR_5421  | 1.418   | 1.6409  | 0.21062979  | 0.504189926 |    |

|           |          |         |             |             |    |
|-----------|----------|---------|-------------|-------------|----|
| siR_5423  | 6.3455   | 5.1466  | -0.30211419 | 0.064304048 |    |
| siR_54258 | 0.01     | 2.4241  | 7.9213054   | 4.98E-21    | ** |
| siR_5426  | 14.0382  | 12.0832 | -0.21635539 | 0.045168744 |    |
| siR_54272 | 1.0989   | 0.9696  | -0.1805985  | 0.64392648  |    |
| siR_54300 | 0.01     | 2.2003  | 7.78155643  | 3.72E-19    | ** |
| siR_54329 | 2.6233   | 1.6036  | -0.71006848 | 0.009477656 |    |
| siR_54354 | 1.2407   | 1.4545  | 0.22936898  | 0.495410968 |    |
| siR_54369 | 0.01     | 2.4614  | 7.94333532  | 2.43E-21    | ** |
| siR_54370 | 0.01     | 1.0069  | 6.6537766   | 3.63E-09    | ** |
| siR_54385 | 0.01     | 2.2749  | 7.82965932  | 8.83E-20    | ** |
| siR_54388 | 0.01     | 1.2307  | 6.94333532  | 4.86E-11    | ** |
| siR_54393 | 1.5243   | 1.268   | -0.26559212 | 0.42675703  |    |
| siR_54406 | 0.01     | 1.6036  | 7.32517051  | 3.67E-14    | ** |
| siR_54425 | 1.2053   | 0.4475  | -1.42943269 | 0.001965568 | ** |
| siR_54437 | 105.2509 | 46.0952 | -1.19114414 | 1.69E-143   | ** |
| siR_54443 | 0.01     | 1.2307  | 6.94333532  | 4.86E-11    | ** |
| siR_54447 | 2.2688   | 0.5967  | -1.92685176 | 1.25E-07    | ** |
| siR_54461 | 0.01     | 2.1258  | 7.73186206  | 1.57E-18    | ** |
| siR_54506 | 2.9069   | 0.8578  | -1.76076822 | 1.71E-08    | ** |
| siR_54519 | 0.01     | 1.5663  | 7.29121675  | 7.54E-14    | ** |
| siR_54554 | 3.6159   | 3.7294  | 0.04458876  | 0.824834847 |    |
| siR_54572 | 1.0989   | 0.9323  | -0.23719393 | 0.547017649 |    |
| siR_54590 | 1.2762   | 0.2984  | -2.096535   | 3.20E-05    | ** |
| siR_54641 | 2.4815   | 1.4545  | -0.77068916 | 0.0067483   |    |
| siR_54655 | 1.5952   | 0.9323  | -0.77487114 | 0.029704074 |    |
| siR_54685 | 1.028    | 0.7086  | -0.53679689 | 0.21005998  |    |
| siR_54750 | 1.6661   | 0.9696  | -0.78101339 | 0.025220231 |    |
| siR_54751 | 1.5598   | 0.5221  | -1.57896299 | 0.000143572 | ** |
| siR_5478  | 3.0132   | 1.3426  | -1.16626689 | 2.44E-05    | ** |
| siR_54865 | 1.3116   | 2.163   | 0.72170586  | 0.016473555 |    |
| siR_54989 | 1.1698   | 0.634   | -0.88370715 | 0.037954945 |    |
| siR_55014 | 0.1772   | 1.1561  | 2.70581568  | 3.67E-06    | ** |
| siR_55050 | 0.01     | 2.536   | 7.98641094  | 5.76E-22    | ** |
| siR_55095 | 4.7857   | 2.2749  | -1.07292683 | 6.24E-07    | ** |
| siR_55129 | 0.01     | 6.9367  | 9.43810568  | 8.38E-59    | ** |
| siR_5516  | 0.01     | 1.6036  | 7.32517051  | 3.67E-14    | ** |
| siR_55197 | 4.7148   | 4.9601  | 0.07317263  | 0.678402044 |    |
| siR_55259 | 1.8434   | 1.1561  | -0.67310296 | 0.038503841 |    |
| siR_55308 | 2.4815   | 1.0069  | -1.30129204 | 3.08E-05    | ** |
| siR_55309 | 1.6661   | 0.5594  | -1.57452284 | 8.69E-05    | ** |
| siR_55334 | 27.261   | 13.7614 | -0.98621124 | 8.69E-29    |    |
| siR_55335 | 14.2509  | 7.0112  | -1.02331974 | 1.10E-16    | ** |
| siR_55336 | 8.1535   | 3.5429  | -1.20248874 | 9.46E-13    | ** |
| siR_55337 | 6.4519   | 3.3564  | -0.94280942 | 1.93E-07    |    |
| siR_55338 | 5.9201   | 2.797   | -1.08174129 | 2.35E-08    | ** |
| siR_55339 | 5.1402   | 2.536   | -1.01926975 | 7.26E-07    | ** |
| siR_55341 | 1.0635   | 0.4102  | -1.37442064 | 0.004842593 | ** |

|           |          |          |              |              |    |
|-----------|----------|----------|--------------|--------------|----|
| siR_55350 | 1. 2053  | 0. 7459  | -0. 69233815 | 0. 087734995 |    |
| siR_55357 | 10. 635  | 6. 0416  | -0. 81581746 | 3. 22E-09    |    |
| siR_55358 | 8. 5434  | 3. 7294  | -1. 19586679 | 3. 44E-13    | ** |
| siR_55359 | 6. 5582  | 2. 797   | -1. 22941965 | 7. 46E-11    | ** |
| siR_55360 | 1. 9143  | 0. 9323  | -1. 03795077 | 0. 002278394 | ** |
| siR_55361 | 1. 6661  | 0. 9323  | -0. 83760882 | 0. 017480007 |    |
| siR_55362 | 2. 5878  | 0. 8205  | -1. 65715088 | 3. 49E-07    | ** |
| siR_55363 | 1. 028   | 0. 2611  | -1. 9771659  | 0. 000342937 | ** |
| siR_55365 | 1. 1344  | 0. 2238  | -2. 3416475  | 2. 83E-05    | ** |
| siR_55400 | 0. 01    | 1. 7901  | 7. 48389637  | 1. 01E-15    | ** |
| siR_55423 | 15. 3144 | 5. 1093  | -1. 58369129 | 1. 51E-33    | ** |
| siR_55424 | 1. 1344  | 0. 4475  | -1. 34196985 | 0. 004230483 | ** |
| siR_55481 | 2. 0561  | 0. 8578  | -1. 26119721 | 0. 000217801 | ** |
| siR_55483 | 3. 1196  | 0. 6713  | -2. 21633151 | 1. 05E-11    | ** |
| siR_55516 | 4. 4312  | 2. 0885  | -1. 0852303  | 1. 31E-06    | ** |
| siR_5556  | 1. 3471  | 0. 7832  | -0. 78240428 | 0. 044337712 |    |
| siR_55575 | 2. 3751  | 1. 6036  | -0. 56667393 | 0. 043515943 |    |
| siR_55576 | 1. 0635  | 1. 1934  | 0. 16625765  | 0. 650059651 |    |
| siR_55643 | 17. 8313 | 2. 8716  | -2. 63448518 | 3. 08E-73    | ** |
| siR_55644 | 2. 7296  | 1. 0442  | -1. 38629149 | 4. 41E-06    | ** |
| siR_55663 | 1. 028   | 0. 4848  | -1. 08437866 | 0. 021479092 | *  |
| siR_55696 | 37. 3643 | 34. 6087 | -0. 11052574 | 0. 088798633 |    |
| siR_55704 | 4. 4667  | 3. 1327  | -0. 51180274 | 0. 011321699 |    |
| siR_55706 | 3. 5095  | 3. 17    | -0. 14678266 | 0. 493815824 |    |
| siR_55708 | 2. 0915  | 1. 1934  | -0. 80946032 | 0. 009562588 |    |
| siR_55751 | 1. 5598  | 1. 1561  | -0. 43209486 | 0. 203345857 |    |
| siR_55784 | 0. 01    | 4. 3634  | 8. 76930892  | 2. 91E-37    | ** |
| siR_55799 | 0. 01    | 1. 6782  | 7. 39077085  | 8. 72E-15    | ** |
| siR_558   | 0. 01    | 1. 4918  | 7. 22091032  | 3. 17E-13    | ** |
| siR_55807 | 24. 425  | 14. 3954 | -0. 76275069 | 2. 38E-17    |    |
| siR_55813 | 28. 5372 | 14. 9175 | -0. 93583801 | 1. 10E-27    |    |
| siR_55814 | 1. 028   | 0. 3729  | -1. 46297956 | 0. 003720663 | ** |
| siR_55820 | 1. 2762  | 0. 5967  | -1. 09677676 | 0. 009487354 | ** |
| siR_55837 | 7. 09    | 3. 804   | -0. 89826838 | 1. 59E-07    |    |
| siR_55843 | 1. 418   | 0. 8578  | -0. 72514431 | 0. 053278736 |    |
| siR_55898 | 6. 381   | 4. 9601  | -0. 36341333 | 0. 02724203  |    |
| siR_55926 | 1. 4889  | 0. 5594  | -1. 4122947  | 0. 000627722 | ** |
| siR_55939 | 0. 01    | 1. 3053  | 7. 02823761  | 1. 15E-11    | ** |
| siR_55968 | 1. 6661  | 1. 0442  | -0. 67407693 | 0. 049053058 |    |
| siR_5598  | 1. 8434  | 1. 0069  | -0. 87244875 | 0. 009591885 |    |
| siR_560   | 0. 01    | 1. 0442  | 6. 70625425  | 1. 77E-09    | ** |
| siR_56012 | 2. 5169  | 0. 5221  | -2. 26924983 | 6. 19E-10    | ** |
| siR_56088 | 1. 5952  | 1. 9393  | 0. 28179868  | 0. 337890081 |    |
| siR_56094 | 4. 5021  | 0. 9323  | -2. 27173193 | 9. 54E-17    | ** |
| siR_56111 | 0. 01    | 2. 9089  | 8. 18432989  | 4. 35E-25    | ** |
| siR_56119 | 0. 01    | 1. 3799  | 7. 10841991  | 2. 74E-12    | ** |
| siR_56122 | 0. 01    | 2. 2749  | 7. 82965932  | 8. 83E-20    | ** |

|           |          |         |             |             |    |
|-----------|----------|---------|-------------|-------------|----|
| siR_56133 | 0.01     | 7.0112  | 9.45351758  | 1.99E-59    | ** |
| siR_56136 | 0.01     | 8.9878  | 9.81182421  | 5.67E-76    | ** |
| siR_56144 | 1.5952   | 1.4918  | -0.09668318 | 0.761821962 |    |
| siR_56147 | 0.01     | 1.3426  | 7.06888574  | 5.63E-12    | ** |
| siR_56150 | 3.2259   | 0.4848  | -2.73424011 | 5.77E-15    | ** |
| siR_56170 | 4.963    | 2.3868  | -1.05613477 | 5.41E-07    | ** |
| siR_56173 | 111.3838 | 25.3598 | -2.13492415 | 0           | ** |
| siR_56205 | 1.2407   | 1.268   | 0.03140043  | 0.925522201 |    |
| siR_56232 | 2.3397   | 1.4172  | -0.72328019 | 0.012838607 |    |
| siR_56233 | 1.5952   | 1.1934  | -0.41865963 | 0.21138519  |    |
| siR_56270 | 0.01     | 1.2307  | 6.94333532  | 4.86E-11    | ** |
| siR_5628  | 7.4799   | 3.8786  | -0.94748298 | 1.79E-08    |    |
| siR_56308 | 1.1344   | 2.4987  | 1.13924826  | 0.000153075 | ** |
| siR_5631  | 25.1695  | 24.4275 | -0.04317034 | 0.581452769 |    |
| siR_56318 | 0.01     | 1.4172  | 7.14689956  | 1.34E-12    | ** |
| siR_56323 | 0.8153   | 1.1561  | 0.50386327  | 0.204958771 |    |
| siR_56354 | 0.01     | 1.7528  | 7.45351758  | 2.07E-15    | ** |
| siR_5636  | 2.0206   | 2.5733  | 0.34883591  | 0.176687251 |    |
| siR_56421 | 4.3603   | 2.4987  | -0.8032497  | 0.000189878 |    |
| siR_56439 | 10.5286  | 5.8551  | -0.8465479  | 1.21E-09    |    |
| siR_56440 | 6.381    | 3.3937  | -0.9109235  | 4.89E-07    |    |
| siR_56441 | 1.6661   | 1.0069  | -0.72655458 | 0.035558339 |    |
| siR_56442 | 1.5952   | 0.4475  | -1.83377773 | 1.94E-05    | ** |
| siR_56560 | 1.737    | 0.4102  | -2.08219836 | 1.23E-06    | ** |
| siR_56562 | 1.5952   | 0.6713  | -1.24870777 | 0.00126596  | ** |
| siR_56576 | 3.7931   | 2.797   | -0.43949715 | 0.042551057 |    |
| siR_56622 | 0.01     | 1.2307  | 6.94333532  | 4.86E-11    | ** |
| siR_56624 | 0.01     | 4.3261  | 8.7569232   | 5.97E-37    | ** |
| siR_56655 | 26.3393  | 12.6799 | -1.05467364 | 6.30E-31    | ** |
| siR_56656 | 1.9497   | 1.0442  | -0.90085409 | 0.006173755 |    |
| siR_56657 | 2.3042   | 0.8205  | -1.48969071 | 8.75E-06    | ** |
| siR_56658 | 1.4534   | 0.5967  | -1.28435413 | 0.001680536 | ** |
| siR_56665 | 6.6646   | 4.5499  | -0.55068345 | 0.000932205 |    |
| siR_56666 | 6.0974   | 3.8413  | -0.66659955 | 0.000173303 |    |
| siR_56667 | 1.8434   | 0.9323  | -0.98350298 | 0.004190062 |    |
| siR_5667  | 1.7016   | 0.2611  | -2.70421758 | 2.14E-08    | ** |
| siR_56698 | 46.1913  | 6.1535  | -2.90814202 | 1.42E-207   | ** |
| siR_56714 | 1.4534   | 1.268   | -0.19687707 | 0.561185369 |    |
| siR_56717 | 0.01     | 1.1188  | 6.80580835  | 4.20E-10    | ** |
| siR_56725 | 0.01     | 1.8274  | 7.51364865  | 4.92E-16    | ** |
| siR_56731 | 0.01     | 13.836  | 10.4342112  | 1.48E-116   | ** |
| siR_56739 | 0.01     | 4.065   | 8.66711154  | 9.14E-35    | ** |
| siR_56758 | 5.282    | 0.9696  | -2.4456227  | 4.79E-21    | ** |
| siR_56766 | 16.5197  | 17.4162 | 0.07624239  | 0.419250101 |    |
| siR_56767 | 2.0206   | 1.0815  | -0.90175009 | 0.005255383 |    |
| siR_56772 | 20.2774  | 15.738  | -0.36562047 | 7.31E-05    |    |
| siR_56773 | 2.446    | 1.3426  | -0.86539486 | 0.002976433 |    |



|           |          |         |             |             |    |
|-----------|----------|---------|-------------|-------------|----|
| siR_56777 | 8.3307   | 7.0485  | -0.24112146 | 0.087126935 |    |
| siR_56781 | 1.0635   | 0.4848  | -1.13335843 | 0.015328041 | *  |
| siR_56784 | 192.4224 | 125.009 | -0.62224479 | 4.41E-88    |    |
| siR_56794 | 13.0456  | 9.2116  | -0.50203963 | 2.01E-05    |    |
| siR_56799 | 2.2688   | 1.0442  | -1.11953137 | 0.00040461  | ** |
| siR_56800 | 2.4106   | 0.7086  | -1.76634891 | 2.76E-07    | ** |
| siR_56834 | 0.01     | 1.4545  | 7.18437949  | 6.51E-13    | ** |
| siR_56838 | 0.01     | 1.3426  | 7.06888574  | 5.63E-12    | ** |
| siR_56867 | 1.418    | 0.4475  | -1.66389794 | 0.000170776 | ** |
| siR_56896 | 2.6587   | 1.4172  | -0.90767763 | 0.001256579 |    |
| siR_57058 | 0.01     | 4.8109  | 8.910163    | 5.22E-41    | ** |
| siR_5711  | 0.01     | 1.6782  | 7.39077085  | 8.72E-15    | ** |
| siR_57110 | 3.4032   | 2.6852  | -0.34186239 | 0.128776011 |    |
| siR_57114 | 9.1461   | 4.5499  | -1.00732186 | 5.60E-11    | ** |
| siR_57117 | 3.6513   | 2.2376  | -0.70645805 | 0.002268488 |    |
| siR_57119 | 1.4534   | 1.7155  | 0.23919731  | 0.440649407 |    |
| siR_57158 | 1.418    | 0.7086  | -1.00081416 | 0.011050653 | *  |
| siR_57185 | 1.9497   | 1.0069  | -0.95333174 | 0.004087468 |    |
| siR_57189 | 17.9022  | 7.7944  | -1.19962702 | 4.11E-26    | ** |
| siR_57200 | 0.01     | 2.163   | 7.75688986  | 7.63E-19    | ** |
| siR_57203 | 1.1344   | 0.2238  | -2.3416475  | 2.83E-05    | ** |
| siR_57206 | 1.2762   | 0.9696  | -0.39639284 | 0.289463081 |    |
| siR_57223 | 0.01     | 7.1231  | 9.47636143  | 2.30E-60    | ** |
| siR_57288 | 0.01     | 1.0069  | 6.6537766   | 3.63E-09    | ** |
| siR_57289 | 5.8138   | 3.4683  | -0.74525275 | 5.28E-05    |    |
| siR_57331 | 2.1979   | 0.4848  | -2.18066414 | 1.77E-08    | ** |
| siR_57332 | 1.418    | 0.2984  | -2.24853809 | 4.52E-06    | ** |
| siR_57335 | 1.5243   | 1.3799  | -0.14358315 | 0.661720724 |    |
| siR_57336 | 2.3397   | 2.0512  | -0.18985539 | 0.474284281 |    |
| siR_57338 | 11.8757  | 11.6357 | -0.02945455 | 0.796397697 |    |
| siR_57340 | 4.3603   | 3.2819  | -0.40989612 | 0.041373129 |    |
| siR_57401 | 0.01     | 1.268   | 6.98641094  | 2.37E-11    | ** |
| siR_57412 | 0.01     | 1.6782  | 7.39077085  | 8.72E-15    | ** |
| siR_5743  | 1.2407   | 0.7832  | -0.66370165 | 0.09494326  |    |
| siR_5745  | 26.7647  | 7.4215  | -1.85054877 | 5.35E-71    | ** |
| siR_57457 | 2.1979   | 0.7459  | -1.55907162 | 7.20E-06    | ** |
| siR_5746  | 1.418    | 0.8578  | -0.72514431 | 0.053278736 |    |
| siR_57461 | 13.5773  | 4.4007  | -1.62539168 | 5.27E-31    | ** |
| siR_57478 | 2.9069   | 0.7459  | -1.96242731 | 1.29E-09    | ** |
| siR_57501 | 0.01     | 6.34    | 9.30833903  | 8.28E-54    | ** |
| siR_57515 | 22.7589  | 6.4891  | -1.81034053 | 6.87E-59    | ** |
| siR_57521 | 16.4488  | 4.4753  | -1.87792604 | 3.82E-45    | ** |
| siR_57536 | 2.836    | 1.7901  | -0.66381735 | 0.010974873 |    |
| siR_57537 | 1.418    | 1.1561  | -0.29459134 | 0.397965171 |    |
| siR_57560 | 1.1698   | 0.4102  | -1.5118625  | 0.001486275 | ** |
| siR_57567 | 1.2053   | 0.7832  | -0.62193961 | 0.120458422 |    |
| siR_57608 | 2.6233   | 0.3729  | -2.8145221  | 9.47E-13    | ** |

|           |         |         |             |             |    |
|-----------|---------|---------|-------------|-------------|----|
| siR_57613 | 0.319   | 1.1934  | 1.90344935  | 0.000143498 | ** |
| siR_57615 | 0.3899  | 1.3426  | 1.78385349  | 0.000111192 | ** |
| siR_57641 | 1.028   | 1.0442  | 0.0225578   | 0.949940384 |    |
| siR_57677 | 12.0884 | 7.3842  | -0.71110977 | 2.09E-08    |    |
| siR_57678 | 3.9349  | 2.0139  | -0.96633492 | 3.42E-05    |    |
| siR_57679 | 2.7296  | 1.6782  | -0.70177489 | 0.008791895 |    |
| siR_57693 | 2.0915  | 0.9323  | -1.16567183 | 0.000456163 | ** |
| siR_57694 | 1.0989  | 0.5594  | -0.97410795 | 0.02925074  |    |
| siR_57716 | 5.4947  | 1.529   | -1.84545231 | 9.49E-16    | ** |
| siR_57739 | 0.01    | 1.9393  | 7.59939219  | 5.69E-17    | ** |
| siR_57741 | 0.01    | 4.5499  | 8.82969103  | 8.00E-39    | ** |
| siR_57770 | 0.9571  | 1.0442  | 0.12565649  | 0.745938859 |    |
| siR_57777 | 3.864   | 2.0885  | -0.88762795 | 0.000131466 |    |
| siR_57800 | 0.01    | 8.503   | 9.73182813  | 6.48E-72    | ** |
| siR_57804 | 0.01    | 11.8222 | 10.20728282 | 1.07E-99    | ** |
| siR_57805 | 0.01    | 1.4545  | 7.18437949  | 6.51E-13    | ** |
| siR_57811 | 1.2053  | 0.3356  | -1.84457766 | 0.000205328 | ** |
| siR_57847 | 1.3471  | 2.0139  | 0.5801351   | 0.056602639 |    |
| siR_57849 | 59.8041 | 31.9235 | -0.90562556 | 2.98E-53    |    |
| siR_57850 | 1.1344  | 0.5594  | -1.01997728 | 0.02136103  | *  |
| siR_57851 | 48.2828 | 22.2644 | -1.11677061 | 1.78E-60    | ** |
| siR_57857 | 3.4386  | 1.1934  | -1.52674362 | 2.94E-08    | ** |
| siR_57883 | 0.01    | 2.5733  | 8.00747585  | 2.81E-22    | ** |
| siR_57903 | 0.01    | 1.0442  | 6.70625425  | 1.77E-09    | ** |
| siR_57910 | 0.01    | 1.9393  | 7.59939219  | 5.69E-17    | ** |
| siR_57912 | 0.01    | 7.3096  | 9.51364865  | 6.33E-62    | ** |
| siR_57915 | 0.01    | 1.9393  | 7.59939219  | 5.69E-17    | ** |
| siR_57919 | 0.01    | 3.0208  | 8.23878686  | 5.04E-26    | ** |
| siR_57922 | 0.01    | 2.797   | 8.12773644  | 3.76E-24    | ** |
| siR_58    | 9.5715  | 6.2654  | -0.61133842 | 1.30E-05    |    |
| siR_5801  | 11.7694 | 3.6175  | -1.70197585 | 8.26E-29    | ** |
| siR_5803  | 2.446   | 0.6713  | -1.86539486 | 7.68E-08    | ** |
| siR_58083 | 0.01    | 3.3192  | 8.37469175  | 1.60E-28    | ** |
| siR_58084 | 0.01    | 1.902   | 7.57137344  | 1.17E-16    | ** |
| siR_58093 | 1.1698  | 0.8578  | -0.44754867 | 0.256675186 |    |
| siR_5813  | 6.8773  | 3.6175  | -0.92684926 | 1.16E-07    |    |
| siR_58131 | 0.01    | 1.1188  | 6.80580835  | 4.20E-10    | ** |
| siR_58220 | 1.028   | 0.7459  | -0.46278613 | 0.27375448  |    |
| siR_58246 | 0.01    | 24.9496 | 11.28480097 | 1.38E-209   | ** |
| siR_58247 | 0.01    | 3.9904  | 8.64038956  | 3.85E-34    | ** |
| siR_58248 | 0.01    | 3.0581  | 8.25649177  | 2.46E-26    | ** |
| siR_58251 | 93.4815 | 72.089  | -0.37490175 | 2.70E-18    |    |
| siR_58252 | 13.3292 | 0.9696  | -3.78105669 | 3.99E-77    | ** |
| siR_58253 | 1.028   | 0.9696  | -0.08437866 | 0.833764704 |    |
| siR_58254 | 1.1698  | 0.7086  | -0.72321852 | 0.080618428 |    |
| siR_58255 | 1.1344  | 0.3356  | -1.75711482 | 0.000500636 | ** |
| siR_58291 | 0.01    | 1.4172  | 7.14689956  | 1.34E-12    | ** |

|           |          |          |             |             |    |
|-----------|----------|----------|-------------|-------------|----|
| siR_58293 | 4.0058   | 1.9393   | -1.04655439 | 8.01E-06    | ** |
| siR_58295 | 12.1948  | 6.4518   | -0.91849248 | 2.36E-12    |    |
| siR_58338 | 3.2259   | 1.3053   | -1.30532029 | 1.83E-06    | ** |
| siR_58353 | 112.1282 | 55.3441  | -1.01864773 | 4.50E-119   | ** |
| siR_58385 | 2.4815   | 1.8647   | -0.41226891 | 0.122983123 |    |
| siR_58389 | 1.1344   | 0.4102   | -1.46753004 | 0.002218064 | ** |
| siR_58393 | 1.4534   | 0.4475   | -1.69947222 | 0.000111574 | ** |
| siR_58402 | 1.3116   | 0.3356   | -1.96651319 | 5.19E-05    | ** |
| siR_58450 | 0.01     | 3.3564   | 8.39077085  | 7.81E-29    | ** |
| siR_58471 | 1.6307   | 0.9323   | -0.80662522 | 0.022857287 |    |
| siR_58472 | 1.1698   | 0.5221   | -1.16386383 | 0.009288174 | ** |
| siR_58499 | 0.01     | 1.3426   | 7.06888574  | 5.63E-12    | ** |
| siR_58502 | 12.5493  | 7.5334   | -0.73623385 | 3.95E-09    |    |
| siR_58503 | 1.7016   | 1.1934   | -0.51181426 | 0.120249063 |    |
| siR_58513 | 1.1698   | 0.634    | -0.88370715 | 0.037954945 |    |
| siR_5852  | 152.0094 | 107.8166 | -0.49558122 | 5.27E-47    |    |
| siR_58537 | 1.737    | 0.2238   | -2.95631581 | 3.07E-09    | ** |
| siR_58581 | 1.4889   | 0.5594   | -1.4122947  | 0.000627722 | ** |
| siR_58608 | 1.7016   | 1.1934   | -0.51181426 | 0.120249063 |    |
| siR_58609 | 1.3116   | 0.4848   | -1.4358662  | 0.001178471 | ** |
| siR_5865  | 2.6942   | 0.8951   | -1.58973618 | 4.48E-07    | ** |
| siR_5866  | 1.3116   | 0.7459   | -0.81427367 | 0.04007629  |    |
| siR_58677 | 1.0635   | 1.3053   | 0.29556139  | 0.411284534 |    |
| siR_58679 | 1.3116   | 0.8578   | -0.61261459 | 0.109565176 |    |
| siR_58694 | 3.4741   | 2.4987   | -0.47546158 | 0.036990037 |    |
| siR_58695 | 2.2688   | 1.1188   | -1.01997728 | 0.001040485 | ** |
| siR_5870  | 1.4534   | 0.4848   | -1.58397021 | 0.000237648 | ** |
| siR_58733 | 6.0974   | 1.1561   | -2.398928   | 1.43E-23    | ** |
| siR_58744 | 0.01     | 2.0512   | 7.68032436  | 6.59E-18    | ** |
| siR_58779 | 2.8714   | 0.8578   | -1.7430411  | 2.62E-08    | ** |
| siR_58807 | 1.1344   | 0.5594   | -1.01997728 | 0.02136103  | *  |
| siR_58811 | 2.7296   | 0.5967   | -2.19361187 | 2.74E-10    | ** |
| siR_58812 | 1.5243   | 0.1492   | -3.35282743 | 4.13E-09    | ** |
| siR_58818 | 4.6794   | 1.0815   | -2.11328989 | 5.47E-16    | ** |
| siR_58821 | 4.5376   | 0.5221   | -3.11953137 | 3.17E-23    | ** |
| siR_5883  | 0.01     | 11.5238  | 10.17040081 | 3.35E-97    | ** |
| siR_5884  | 0.01     | 1.1934   | 6.89893387  | 9.98E-11    | ** |
| siR_58861 | 0.01     | 1.4545   | 7.18437949  | 6.51E-13    | ** |
| siR_58867 | 0.7444   | 1.1934   | 0.68092772  | 0.0917254   |    |
| siR_58987 | 0.01     | 1.0069   | 6.6537766   | 3.63E-09    | ** |
| siR_59016 | 2.446    | 1.0069   | -1.28050399 | 4.39E-05    | ** |
| siR_59157 | 3.545    | 2.2003   | -0.68808539 | 0.003297541 |    |
| siR_592   | 1.1698   | 0.634    | -0.88370715 | 0.037954945 |    |
| siR_59206 | 0.01     | 1.1934   | 6.89893387  | 9.98E-11    | ** |
| siR_59215 | 3.8286   | 5.5941   | 0.5470891   | 0.002508493 |    |
| siR_59218 | 49.0982  | 19.7657  | -1.31267109 | 8.65E-79    | ** |
| siR_59224 | 3.1905   | 2.4614   | -0.37430341 | 0.109444453 |    |

|           |          |          |             |             |    |
|-----------|----------|----------|-------------|-------------|----|
| siR_59228 | 0.01     | 1.1188   | 6.80580835  | 4.20E-10    | ** |
| siR_59251 | 4.5021   | 1.0069   | -2.16067769 | 7.86E-16    | ** |
| siR_59371 | 1.3825   | 1.3799   | -0.00271576 | 0.99639346  |    |
| siR_59382 | 0.01     | 3.2446   | 8.34189682  | 6.75E-28    | ** |
| siR_59394 | 1.4889   | 0.5221   | -1.5118488  | 0.000322184 | ** |
| siR_59403 | 5.9201   | 0.634    | -3.2230668  | 9.06E-31    | ** |
| siR_59417 | 3.3677   | 3.2819   | -0.03723235 | 0.863765823 |    |
| siR_59430 | 0.01     | 2.2749   | 7.82965932  | 8.83E-20    | ** |
| siR_59435 | 0.01     | 2.6852   | 8.06888574  | 3.25E-23    | ** |
| siR_59438 | 0.01     | 1.0442   | 6.70625425  | 1.77E-09    | ** |
| siR_59445 | 0.01     | 3.7294   | 8.54279973  | 5.90E-32    | ** |
| siR_59448 | 0.01     | 1.0815   | 6.75688986  | 8.62E-10    | ** |
| siR_59455 | 0.01     | 13.7987  | 10.43031664 | 3.03E-116   | ** |
| siR_59456 | 0.01     | 5.8178   | 9.18432989  | 1.94E-49    | ** |
| siR_59457 | 0.01     | 1.1561   | 6.85312238  | 2.05E-10    | ** |
| siR_59461 | 0.01     | 2.536    | 7.98641094  | 5.76E-22    | ** |
| siR_59462 | 0.01     | 1.3053   | 7.02823761  | 1.15E-11    | ** |
| siR_59479 | 5.3529   | 1.3053   | -2.03593928 | 2.59E-17    | ** |
| siR_59557 | 0.01     | 14.9548  | 10.5463929  | 6.38E-126   | ** |
| siR_59567 | 3.6513   | 1.4545   | -1.32788691 | 2.65E-07    | ** |
| siR_59597 | 1.7725   | 0.5967   | -1.57070795 | 5.27E-05    | ** |
| siR_59619 | 1.3825   | 0.634    | -1.12472473 | 0.005814363 | ** |
| siR_59642 | 2.9778   | 1.1188   | -1.4122947  | 1.14E-06    | ** |
| siR_59657 | 1.1344   | 1.0442   | -0.11953137 | 0.754361807 |    |
| siR_5966  | 5.4947   | 0.7832   | -2.81058804 | 3.22E-25    | ** |
| siR_59662 | 1.2407   | 0.2611   | -2.24847995 | 1.86E-05    | ** |
| siR_59664 | 1.4534   | 0.7086   | -1.03638844 | 0.008088782 | ** |
| siR_59695 | 16.7678  | 4.3261   | -1.9545545  | 2.01E-48    | ** |
| siR_59699 | 3.4741   | 0.8951   | -1.95651851 | 3.38E-11    | ** |
| siR_59705 | 1.2407   | 0.8205   | -0.59657908 | 0.128834839 |    |
| siR_5971  | 0.01     | 2.3122   | 7.85312238  | 4.30E-20    | ** |
| siR_59723 | 160.0211 | 161.8927 | 0.01677579  | 0.584174195 |    |
| siR_59724 | 1.9852   | 2.2749   | 0.19651877  | 0.461737456 |    |
| siR_59725 | 1.028    | 1.1188   | 0.12211189  | 0.744335346 |    |
| siR_59730 | 1.1344   | 0.1119   | -3.3416475  | 4.83E-07    | ** |
| siR_59736 | 2.5878   | 2.7597   | 0.09278532  | 0.695723877 |    |
| siR_59737 | 2.446    | 2.8716   | 0.2314304   | 0.333306891 |    |
| siR_59751 | 20.4546  | 14.0225  | -0.54468174 | 8.84E-09    |    |
| siR_5976  | 0.01     | 1.2307   | 6.94333532  | 4.86E-11    | ** |
| siR_59768 | 16.6969  | 5.5568   | -1.58725405 | 1.53E-36    | ** |
| siR_59776 | 0.01     | 1.1934   | 6.89893387  | 9.98E-11    | ** |
| siR_59837 | 8.4016   | 2.4987   | -1.7494864  | 9.07E-22    | ** |
| siR_59865 | 1.4889   | 0.5221   | -1.5118488  | 0.000322184 | ** |
| siR_59878 | 13.79    | 5.6687   | -1.28253263 | 1.47E-22    | ** |
| siR_5992  | 1.7725   | 1.902    | 0.10173162  | 0.722133637 |    |
| siR_59924 | 5.4593   | 0.7459   | -2.87166185 | 1.35E-25    | ** |
| siR_59927 | 1.1344   | 0.3729   | -1.60506874 | 0.001091833 | ** |

|           |         |         |             |             |    |
|-----------|---------|---------|-------------|-------------|----|
| siR_59928 | 1.028   | 0.1865  | -2.46259273 | 4.21E-05    | ** |
| siR_59938 | 4.7503  | 3.8786  | -0.29248263 | 0.120975045 |    |
| siR_59941 | 11.2376 | 17.3416 | 0.62590306  | 1.83E-09    |    |
| siR_59980 | 3.4032  | 3.9531  | 0.21609251  | 0.287629804 |    |
| siR_60003 | 1.028   | 1.0815  | 0.0731934   | 0.844954568 |    |
| siR_60012 | 4.7148  | 2.797   | -0.75331632 | 0.000240229 |    |
| siR_60025 | 0.01    | 4.1396  | 8.69334756  | 2.17E-35    | ** |
| siR_60028 | 0.01    | 4.1769  | 8.70628879  | 1.06E-35    | ** |
| siR_60035 | 0.01    | 2.6479  | 8.04870483  | 6.67E-23    | ** |
| siR_60041 | 0.01    | 2.2376  | 7.80580835  | 1.81E-19    | ** |
| siR_60056 | 0.01    | 1.6782  | 7.39077085  | 8.72E-15    | ** |
| siR_60066 | 1.2407  | 1.1561  | -0.10188812 | 0.77947926  |    |
| siR_60089 | 0.7444  | 1.0442  | 0.4882481   | 0.242082153 |    |
| siR_60099 | 1.1344  | 0.2238  | -2.3416475  | 2.83E-05    | ** |
| siR_60125 | 0.01    | 1.1188  | 6.80580835  | 4.20E-10    | ** |
| siR_60127 | 3.5804  | 2.6106  | -0.45573935 | 0.041640192 |    |
| siR_60128 | 2.1624  | 0.9696  | -1.15717181 | 0.000393412 | ** |
| siR_60135 | 1.028   | 0.8205  | -0.32526503 | 0.431150137 |    |
| siR_60154 | 1.2407  | 0.3729  | -1.73429361 | 0.000303178 | ** |
| siR_60159 | 6.7355  | 2.797   | -1.26790479 | 1.38E-11    | ** |
| siR_60160 | 2.7651  | 0.7459  | -1.89027752 | 7.88E-09    | ** |
| siR_60163 | 9.5715  | 2.7225  | -1.81381299 | 9.14E-26    | ** |
| siR_60180 | 1.028   | 0.7459  | -0.46278613 | 0.27375448  |    |
| siR_60195 | 4.3958  | 3.6548  | -0.26633329 | 0.172591245 |    |
| siR_60202 | 1.3471  | 0.8578  | -0.65114373 | 0.086805871 |    |
| siR_60238 | 2.1979  | 0.634   | -1.793571   | 7.22E-07    | ** |
| siR_60239 | 1.5243  | 0.3729  | -2.03128617 | 7.99E-06    | ** |
| siR_60242 | 2.9423  | 1.1934  | -1.30186667 | 5.49E-06    | ** |
| siR_60243 | 1.1698  | 0.3729  | -1.64940119 | 0.000716423 | ** |
| siR_60293 | 0.01    | 2.0139  | 7.65384824  | 1.35E-17    | ** |
| siR_60294 | 1.7725  | 0.5594  | -1.66383347 | 2.51E-05    | ** |
| siR_60305 | 0.01    | 2.0885  | 7.70632333  | 3.21E-18    | ** |
| siR_60327 | 0.01    | 3.17    | 8.30833903  | 2.84E-27    | ** |
| siR_60351 | 1.6307  | 0.0746  | -4.45017195 | 1.34E-11    | ** |
| siR_60361 | 9.8196  | 6.2654  | -0.64825764 | 3.26E-06    |    |
| siR_60366 | 0.01    | 1.2307  | 6.94333532  | 4.86E-11    | ** |
| siR_60391 | 8.7207  | 2.2376  | -1.96249178 | 4.49E-26    | ** |
| siR_60422 | 0.01    | 1.4172  | 7.14689956  | 1.34E-12    | ** |
| siR_60447 | 7.6926  | 0.634   | -3.60091655 | 1.89E-43    | ** |
| siR_60462 | 0.01    | 1.3426  | 7.06888574  | 5.63E-12    | ** |
| siR_605   | 1.8079  | 0.8578  | -1.07560166 | 0.002277255 | ** |
| siR_60507 | 2.836   | 0.7459  | -1.9268034  | 3.20E-09    | ** |
| siR_60536 | 1.0989  | 1.2307  | 0.16341902  | 0.650589112 |    |
| siR_60539 | 2.8005  | 1.8274  | -0.61589197 | 0.018044727 |    |
| siR_60558 | 1.7725  | 0.6713  | -1.40075608 | 0.00020303  | ** |
| siR_60587 | 1.5952  | 2.9089  | 0.86673639  | 0.001111248 |    |
| siR_60589 | 4.8921  | 3.9531  | -0.30746944 | 0.098927707 |    |

|           |          |         |             |             |    |
|-----------|----------|---------|-------------|-------------|----|
| siR_60603 | 0.01     | 1.0815  | 6.75688986  | 8.62E-10    | ** |
| siR_60626 | 2.446    | 2.4241  | -0.01297519 | 0.960915493 |    |
| siR_60649 | 1.0635   | 0.4848  | -1.13335843 | 0.015328041 | *  |
| siR_60656 | 17.016   | 20.2506 | 0.25107272  | 0.005427097 |    |
| siR_60661 | 4.3249   | 4.438   | 0.03724289  | 0.839920391 |    |
| siR_60672 | 1.2053   | 1.3053  | 0.11498914  | 0.739698816 |    |
| siR_60674 | 3.0132   | 0.5967  | -2.33621875 | 5.27E-12    | ** |
| siR_60737 | 0.01     | 1.4918  | 7.22091032  | 3.17E-13    | ** |
| siR_60739 | 1.6307   | 0.7832  | -1.05803872 | 0.004283913 | ** |
| siR_60764 | 8.8979   | 6.974   | -0.35147852 | 0.011437433 |    |
| siR_60765 | 0.9926   | 1.268   | 0.35327039  | 0.338369281 |    |
| siR_6083  | 1.5243   | 1.7901  | 0.23189331  | 0.444430402 |    |
| siR_60830 | 1.5952   | 0.2611  | -2.61106295 | 1.07E-07    | ** |
| siR_60853 | 43.7098  | 43.8576 | 0.00487009  | 0.933468049 |    |
| siR_60856 | 52.1114  | 55.4933 | 0.09071458  | 0.087248483 |    |
| siR_60878 | 2.127    | 0.5967  | -1.83374235 | 7.51E-07    | ** |
| siR_6090  | 0.01     | 1.1561  | 6.85312238  | 2.05E-10    | ** |
| siR_60907 | 6.3101   | 8.1674  | 0.37221402  | 0.0103985   |    |
| siR_60911 | 0.01     | 2.1258  | 7.73186206  | 1.57E-18    | ** |
| siR_60931 | 1.2053   | 0.4475  | -1.42943269 | 0.001965568 | ** |
| siR_60932 | 1.0989   | 0.2611  | -2.07338574 | 0.000132441 | ** |
| siR_60936 | 0.01     | 3.5056  | 8.45351758  | 4.40E-30    | ** |
| siR_60938 | 0.7444   | 1.1561  | 0.63511623  | 0.118651509 |    |
| siR_6095  | 1.3116   | 0.9696  | -0.4358662  | 0.240578977 |    |
| siR_60955 | 2.2688   | 1.4918  | -0.60487531 | 0.036482065 |    |
| siR_60956 | 0.6381   | 1.0442  | 0.71054362  | 0.101902462 |    |
| siR_60966 | 2.4106   | 3.3564  | 0.47752238  | 0.038795245 |    |
| siR_60969 | 1.8788   | 1.5663  | -0.26245093 | 0.382003897 |    |
| siR_60971 | 8.1535   | 3.0954  | -1.39729364 | 1.08E-15    | ** |
| siR_60972 | 3.0841   | 1.6782  | -0.87793488 | 0.000723099 |    |
| siR_60973 | 2.7651   | 1.1188  | -1.3053795  | 1.02E-05    | ** |
| siR_60979 | 0.01     | 1.0442  | 6.70625425  | 1.77E-09    | ** |
| siR_60992 | 4.1831   | 0.5594  | -2.90262033 | 3.86E-20    | ** |
| siR_60995 | 0.01     | 1.7155  | 7.42248532  | 4.25E-15    | ** |
| siR_61008 | 8.6852   | 3.3937  | -1.35570003 | 6.05E-16    | ** |
| siR_61026 | 1.7725   | 0.8205  | -1.11121039 | 0.001927105 | ** |
| siR_61032 | 114.2552 | 38.7483 | -1.56005491 | 9.00E-234   | ** |
| siR_61035 | 26.9774  | 6.8994  | -1.9672085  | 1.64E-77    | ** |
| siR_61047 | 3.2259   | 2.4987  | -0.36852402 | 0.112629098 |    |
| siR_61051 | 0.01     | 1.6036  | 7.32517051  | 3.67E-14    | ** |
| siR_61053 | 0.01     | 2.6106  | 8.02823761  | 1.37E-22    | ** |
| siR_61065 | 1.028    | 0.5967  | -0.78476258 | 0.079326488 |    |
| siR_61074 | 2.2333   | 0.9696  | -1.20371546 | 0.000201232 | ** |
| siR_61104 | 0.01     | 9.0997  | 9.82967517  | 6.56E-77    | ** |
| siR_61109 | 0.01     | 36.4361 | 11.83115283 | 9.74E-306   | ** |
| siR_61114 | 0.01     | 7.5707  | 9.56428289  | 4.13E-64    | ** |
| siR_61118 | 0.01     | 4.5126  | 8.81781509  | 1.64E-38    | ** |

|           |         |         |             |             |    |
|-----------|---------|---------|-------------|-------------|----|
| siR_61130 | 0.8862  | 1.2307  | 0.4737749   | 0.216116099 |    |
| siR_61134 | 0.01    | 7.5334  | 9.55715732  | 8.48E-64    | ** |
| siR_61143 | 1.1698  | 0.4475  | -1.38630231 | 0.002893159 | ** |
| siR_61150 | 7.5508  | 1.4918  | -2.33957537 | 4.86E-28    | ** |
| siR_61156 | 3.4741  | 2.0139  | -0.78664723 | 0.001080173 |    |
| siR_61157 | 2.0915  | 1.4918  | -0.48748387 | 0.09876211  |    |
| siR_61160 | 0.01    | 12.5307 | 10.29125129 | 1.25E-105   | ** |
| siR_61161 | 0.01    | 1.268   | 6.98641094  | 2.37E-11    | ** |
| siR_61169 | 0.01    | 3.7294  | 8.54279973  | 5.90E-32    | ** |
| siR_61215 | 1.3825  | 0.3356  | -2.04246486 | 2.03E-05    | ** |
| siR_61263 | 1.0635  | 1.7901  | 0.75122015  | 0.024004544 |    |
| siR_61272 | 2.0915  | 0.4475  | -2.22457841 | 2.69E-08    | ** |
| siR_61301 | 1.9143  | 1.529   | -0.32422853 | 0.280552793 |    |
| siR_61337 | 0.01    | 6.0043  | 9.22985225  | 5.34E-51    | ** |
| siR_61360 | 0.01    | 3.8786  | 8.59939219  | 3.33E-33    | ** |
| siR_61365 | 0.01    | 5.2957  | 9.04867759  | 4.56E-45    | ** |
| siR_61368 | 0.01    | 3.2446  | 8.34189682  | 6.75E-28    | ** |
| siR_61371 | 0.01    | 36.4734 | 11.83262898 | 4.75E-306   | ** |
| siR_61372 | 0.01    | 1.6036  | 7.32517051  | 3.67E-14    | ** |
| siR_61382 | 1.7725  | 0.9696  | -0.87032402 | 0.011285895 |    |
| siR_6139  | 0.01    | 1.0069  | 6.6537766   | 3.63E-09    | ** |
| siR_61420 | 0.01    | 8.4657  | 9.72548555  | 1.33E-71    | ** |
| siR_61422 | 54.0966 | 34.1985 | -0.66160488 | 8.25E-29    |    |
| siR_61423 | 0.8508  | 1.0442  | 0.29550613  | 0.462829197 |    |
| siR_61426 | 0.01    | 3.8786  | 8.59939219  | 3.33E-33    | ** |
| siR_61430 | 1.1344  | 0.7086  | -0.67888607 | 0.103795176 |    |
| siR_61432 | 15.3853 | 8.5776  | -0.84290663 | 2.38E-13    |    |
| siR_61470 | 0.01    | 1.3799  | 7.10841991  | 2.74E-12    | ** |
| siR_61502 | 1.1698  | 0.634   | -0.88370715 | 0.037954945 |    |
| siR_61504 | 0.01    | 8.1674  | 9.67373308  | 4.18E-69    | ** |
| siR_61505 | 0.01    | 8.1301  | 9.66712929  | 8.58E-69    | ** |
| siR_61510 | 0.01    | 4.5499  | 8.82969103  | 8.00E-39    | ** |
| siR_61519 | 0.01    | 2.6479  | 8.04870483  | 6.67E-23    | ** |
| siR_61564 | 1.4534  | 1.3053  | -0.15505039 | 0.645288754 |    |
| siR_61565 | 1.3825  | 0.5594  | -1.30532732 | 0.001931693 | ** |
| siR_61569 | 2.3397  | 2.1258  | -0.13831769 | 0.599362516 |    |
| siR_61588 | 0.01    | 1.268   | 6.98641094  | 2.37E-11    | ** |
| siR_61591 | 0.01    | 5.6687  | 9.14687411  | 3.45E-48    | ** |
| siR_61594 | 0.01    | 1.6036  | 7.32517051  | 3.67E-14    | ** |
| siR_61613 | 0.01    | 1.9766  | 7.62687714  | 2.78E-17    | ** |
| siR_61615 | 1.9143  | 0.634   | -1.59426219 | 2.13E-05    | ** |
| siR_61637 | 1.7725  | 0.8205  | -1.11121039 | 0.001927105 | ** |
| siR_61644 | 1.5952  | 1.902   | 0.25377993  | 0.390253721 |    |
| siR_61652 | 1.3116  | 0.4475  | -1.55136822 | 0.000594069 | ** |
| siR_61666 | 1.7016  | 0.7086  | -1.26384857 | 0.000771078 | ** |
| siR_61684 | 1.0989  | 1.529   | 0.4765283   | 0.165148936 |    |
| siR_61690 | 0.01    | 1.268   | 6.98641094  | 2.37E-11    | ** |

|           |         |         |             |             |    |
|-----------|---------|---------|-------------|-------------|----|
| siR_61722 | 5.8847  | 3.17    | -0.89248603 | 2.06E-06    |    |
| siR_61728 | 2.836   | 1.902   | -0.57634029 | 0.024940499 |    |
| siR_61755 | 5.5656  | 3.9159  | -0.5071933  | 0.005015865 |    |
| siR_61772 | 1.0989  | 0.9323  | -0.23719393 | 0.547017649 |    |
| siR_61803 | 93.9778 | 83.8739 | -0.16409805 | 7.13E-05    |    |
| siR_61819 | 1.1698  | 0.2238  | -2.38597995 | 1.70E-05    | ** |
| siR_61827 | 0.01    | 1.3053  | 7.02823761  | 1.15E-11    | ** |
| siR_61849 | 0.01    | 3.2073  | 8.32521549  | 1.38E-27    | ** |
| siR_61850 | 1.737   | 1.268   | -0.45404301 | 0.159418817 |    |
| siR_61873 | 1.2407  | 0.1865  | -2.73390678 | 1.71E-06    | ** |
| siR_61953 | 10.3868 | 2.3122  | -2.16741315 | 9.69E-35    | ** |
| siR_61955 | 1.1698  | 0.2984  | -1.97094245 | 0.000133017 | ** |
| siR_62007 | 2.5878  | 0.7086  | -1.86868275 | 3.07E-08    | ** |
| siR_62024 | 1.8079  | 0.4102  | -2.13991548 | 4.70E-07    | ** |
| siR_62030 | 1.3471  | 0.6713  | -1.0048274  | 0.013015658 | *  |
| siR_62058 | 1.028   | 0.5221  | -0.9774422  | 0.034659916 |    |
| siR_62059 | 1.0989  | 0.2611  | -2.07338574 | 0.000132441 | ** |
| siR_62085 | 0.01    | 3.17    | 8.30833903  | 2.84E-27    | ** |
| siR_62099 | 0.01    | 1.8274  | 7.51364865  | 4.92E-16    | ** |
| siR_62117 | 0.9217  | 1.1188  | 0.279583    | 0.470644087 |    |
| siR_62148 | 7.7281  | 5.6314  | -0.45662013 | 0.002651046 |    |
| siR_62153 | 1.3825  | 0.7832  | -0.81982681 | 0.03388769  |    |
| siR_62178 | 1.4534  | 1.0815  | -0.42639815 | 0.225490154 |    |
| siR_62194 | 1.3825  | 0.5967  | -1.2122018  | 0.003421985 | ** |
| siR_62195 | 0.01    | 3.804   | 8.57137344  | 1.40E-32    | ** |
| siR_62196 | 0.01    | 1.902   | 7.57137344  | 1.17E-16    | ** |
| siR_62201 | 13.6128 | 6.4518  | -1.07719022 | 2.86E-17    | ** |
| siR_62206 | 0.01    | 1.4545  | 7.18437949  | 6.51E-13    | ** |
| siR_62209 | 0.01    | 6.0043  | 9.22985225  | 5.34E-51    | ** |
| siR_62239 | 1.3471  | 0.6713  | -1.0048274  | 0.013015658 | *  |
| siR_62270 | 1.4889  | 0.634   | -1.23169211 | 0.002080356 | ** |
| siR_62271 | 1.1698  | 0.2984  | -1.97094245 | 0.000133017 | ** |
| siR_62292 | 1.0635  | 0.4848  | -1.13335843 | 0.015328041 | *  |
| siR_62298 | 1.2762  | 0.634   | -1.00929969 | 0.015340798 | *  |
| siR_62316 | 1.9852  | 2.0512  | 0.04718381  | 0.861493334 |    |
| siR_62322 | 0.01    | 1.6782  | 7.39077085  | 8.72E-15    | ** |
| siR_62345 | 1.1698  | 0.6713  | -0.80123235 | 0.056236154 |    |
| siR_62375 | 1.1698  | 0.2611  | -2.16358753 | 5.01E-05    | ** |
| siR_62404 | 6.1328  | 2.9462  | -1.05769053 | 2.39E-08    | ** |
| siR_62438 | 1.5952  | 0.9696  | -0.71827571 | 0.041817619 |    |
| siR_62454 | 6.8773  | 4.1023  | -0.74540928 | 1.08E-05    |    |
| siR_62468 | 1.2407  | 0.2238  | -2.47087237 | 6.03E-06    | ** |
| siR_62496 | 1.2407  | 0.634   | -0.96859957 | 0.020904832 |    |
| siR_62514 | 0.01    | 1.0442  | 6.70625425  | 1.77E-09    | ** |
| siR_62527 | 10.5641 | 11.3    | 0.09715291  | 0.408773227 |    |
| siR_62531 | 0.01    | 2.8716  | 8.16571099  | 8.93E-25    | ** |
| siR_62566 | 1.7016  | 1.6036  | -0.08557762 | 0.781632893 |    |



|           |         |         |             |               |    |
|-----------|---------|---------|-------------|---------------|----|
| siR_6259  | 3.2968  | 5.4076  | 0.71392207  | 0.000165309   |    |
| siR_6260  | 0.9571  | 1.8647  | 0.96220197  | 0.00445603    |    |
| siR_62641 | 2.2333  | 0.7086  | -1.65613369 | 2.30E-06      | ** |
| siR_62646 | 1.4534  | 1.0069  | -0.5295114  | 0.13923808    |    |
| siR_62707 | 0.709   | 1.0442  | 0.55854053  | 0.186352658   |    |
| siR_6271  | 1.3825  | 0.8205  | -0.75270424 | 0.048742451   |    |
| siR_62742 | 0.01    | 1.0815  | 6.75688986  | 8.62E-10      | ** |
| siR_62825 | 3.6513  | 1.8647  | -0.96946667 | 6.31E-05      |    |
| siR_62863 | 6.4519  | 2.6852  | -1.26469453 | 4.04E-11      | ** |
| siR_62966 | 54.0966 | 22.6374 | -1.25682965 | 4.31E-81      | ** |
| siR_62969 | 9.217   | 7.0485  | -0.38698098 | 0.004854143   |    |
| siR_63001 | 2.0206  | 0.2984  | -2.75946431 | 6.29E-10      | ** |
| siR_63009 | 2.6587  | 0.4102  | -2.6963216  | 2.15E-12      | ** |
| siR_63016 | 1.0635  | 0.4475  | -1.24886045 | 0.008857046   | ** |
| siR_63081 | 1.0635  | 0.5967  | -0.83374235 | 0.060029399   |    |
| siR_63180 | 0.01    | 1.1934  | 6.89893387  | 9.98E-11      | ** |
| siR_63195 | 26.0557 | 17.6027 | -0.56580228 | 1.82E-11      |    |
| siR_63196 | 1.2407  | 0.7086  | -0.80811094 | 0.047445627   |    |
| siR_632   | 2.0561  | 0.4848  | -2.08444883 | 1.21E-07      | ** |
| siR_63202 | 18.5403 | 17.9011 | -0.05061635 | 0.57967959    |    |
| siR_63219 | 0.01    | 11.9713 | 10.22536411 | 6.01E-101     | ** |
| siR_6322  | 1.1344  | 0.5221  | -1.11953137 | 0.013060942   | *  |
| siR_63230 | 0.01    | 1.4172  | 7.14689956  | 1.34E-12      | ** |
| siR_63282 | 3.8995  | 1.3426  | -1.5382596  | 2.82E-09      | ** |
| siR_63283 | 3.2968  | 1.3799  | -1.25650265 | 2.82E-06      | ** |
| siR_63286 | 3.5804  | 1.4918  | -1.26306664 | 9.45E-07      | ** |
| siR_633   | 1.2053  | 0.4475  | -1.42943269 | 0.001965568   | ** |
| siR_63364 | 6.7709  | 2.8343  | -1.25635514 | 1.70E-11      | ** |
| siR_63366 | 1.1698  | 0.9696  | -0.27080029 | 0.47987045    |    |
| siR_6338  | 1.5952  | 1.1934  | -0.41865963 | 0.21138519    |    |
| siR_6339  | 2.127   | 1.7901  | -0.24877985 | 0.376317348   |    |
| siR_63393 | 0.01    | 4.2142  | 8.71911497  | 5.16E-36      | ** |
| siR_6350  | 0.01    | 10.666  | 10.05880352 | 5.07E-90      | ** |
| siR_6351  | 0.01    | 1.3799  | 7.10841991  | 2.74E-12      | ** |
| siR_63547 | 2.9778  | 2.9462  | -0.01539149 | 0.948054597   |    |
| siR_63564 | 1.5243  | 1.268   | -0.26559212 | 0.42675703    |    |
| siR_63579 | 1.5952  | 0.9696  | -0.71827571 | 0.041817619   |    |
| siR_63581 | 6.7709  | 3.5802  | -0.91930743 | 1.76E-07      |    |
| siR_63583 | 8.4371  | 3.6921  | -1.19230557 | 5.47E-13      | ** |
| siR_6362  | 0.01    | 38.5246 | 11.91156426 | 439387504748e | ** |
| siR_6363  | 0.01    | 1.8647  | 7.54279973  | 2.40E-16      | ** |
| siR_6364  | 0.01    | 1.3053  | 7.02823761  | 1.15E-11      | ** |
| siR_63641 | 10.7413 | 8.503   | -0.33712477 | 0.007524414   |    |
| siR_6365  | 0.01    | 1.3053  | 7.02823761  | 1.15E-11      | ** |
| siR_63703 | 0.01    | 4.6617  | 8.86471235  | 9.25E-40      | ** |
| siR_63705 | 0.01    | 1.2307  | 6.94333532  | 4.86E-11      | ** |
| siR_63709 | 0.01    | 6.9367  | 9.43810568  | 8.38E-59      | ** |

|           |         |         |             |             |    |
|-----------|---------|---------|-------------|-------------|----|
| siR_63726 | 1.4889  | 0.2984  | -2.31892742 | 1.66E-06    | ** |
| siR_63771 | 1.6307  | 0.7086  | -1.20244802 | 0.001551793 | ** |
| siR_63808 | 0.01    | 1.4172  | 7.14689956  | 1.34E-12    | ** |
| siR_63828 | 6.0265  | 2.8343  | -1.0883279  | 1.50E-08    | ** |
| siR_6388  | 0.01    | 1.7155  | 7.42248532  | 4.25E-15    | ** |
| siR_63956 | 1.1698  | 0.4848  | -1.27080029 | 0.005319168 | ** |
| siR_63996 | 1.4889  | 0.4848  | -1.61878526 | 0.000157192 | ** |
| siR_64006 | 1.1344  | 0.8578  | -0.40321622 | 0.310894164 |    |
| siR_64012 | 1.5243  | 0.6713  | -1.18311732 | 0.002538095 | ** |
| siR_64033 | 1.0989  | 0.1865  | -2.55881257 | 1.47E-05    | ** |
| siR_64036 | 1.028   | 0.6713  | -0.61481072 | 0.156712209 |    |
| siR_64055 | 5.4593  | 2.0885  | -1.38624884 | 7.30E-11    | ** |
| siR_64063 | 1.2762  | 0.4475  | -1.51189485 | 0.000890445 | ** |
| siR_64118 | 1.2762  | 0.4848  | -1.39639284 | 0.001733978 | ** |
| siR_64120 | 1.6661  | 1.9393  | 0.219061    | 0.450962728 |    |
| siR_64121 | 1.028   | 0.4102  | -1.32544087 | 0.007079856 | ** |
| siR_64134 | 1.0989  | 0.5967  | -0.88098242 | 0.045030158 |    |
| siR_64154 | 0.01    | 1.902   | 7.57137344  | 1.17E-16    | ** |
| siR_64161 | 0.01    | 2.2376  | 7.80580835  | 1.81E-19    | ** |
| siR_64166 | 10.0678 | 5.967   | -0.75467078 | 7.25E-08    |    |
| siR_64173 | 2.3751  | 1.2307  | -0.94850913 | 0.00157346  |    |
| siR_64176 | 13.2937 | 7.1977  | -0.88513482 | 1.28E-12    |    |
| siR_64181 | 4.1476  | 2.163   | -0.9392431  | 3.25E-05    |    |
| siR_64186 | 1.5598  | 0.7459  | -1.06430692 | 0.005019683 | ** |
| siR_64189 | 19.852  | 10.5169 | -0.91657485 | 4.06E-19    |    |
| siR_64220 | 1.3116  | 0.7832  | -0.74387514 | 0.057586901 |    |
| siR_64223 | 5.9201  | 4.1396  | -0.51613018 | 0.003273543 |    |
| siR_64226 | 1.6661  | 1.7901  | 0.10356519  | 0.725571256 |    |
| siR_6424  | 1.1698  | 0.5594  | -1.06430974 | 0.015477614 | *  |
| siR_64244 | 10.4577 | 6.0789  | -0.7826834  | 1.47E-08    |    |
| siR_64249 | 8.6498  | 8.0555  | -0.10269264 | 0.447335754 |    |
| siR_64286 | 1.3116  | 0.8951  | -0.55120703 | 0.145600742 |    |
| siR_64287 | 7.1254  | 2.3495  | -1.60061724 | 1.18E-16    | ** |
| siR_64289 | 2.1624  | 0.9696  | -1.15717181 | 0.000393412 | ** |
| siR_64349 | 0.01    | 6.0416  | 9.23878686  | 2.60E-51    | ** |
| siR_64352 | 0.01    | 1.8274  | 7.51364865  | 4.92E-16    | ** |
| siR_64359 | 0.01    | 1.3799  | 7.10841991  | 2.74E-12    | ** |
| siR_64408 | 3.3323  | 1.8274  | -0.86672583 | 0.00050633  |    |
| siR_645   | 7.0191  | 1.4918  | -2.23423193 | 7.86E-25    | ** |
| siR_64501 | 1.1698  | 0.7086  | -0.72321852 | 0.080618428 |    |
| siR_64502 | 1.9143  | 0.6713  | -1.51178739 | 4.32E-05    | ** |
| siR_64513 | 2.4815  | 2.4614  | -0.01173333 | 0.964652577 |    |
| siR_64543 | 1.3825  | 1.1934  | -0.2122018  | 0.542538264 |    |
| siR_64554 | 2.6233  | 2.7225  | 0.05354925  | 0.820591466 |    |
| siR_64561 | 0.01    | 1.0442  | 6.70625425  | 1.77E-09    | ** |
| siR_6458  | 8.7561  | 6.5264  | -0.42400102 | 0.002805005 |    |
| siR_64583 | 4.254   | 1.6409  | -1.37433271 | 1.15E-08    | ** |

|           |          |          |              |              |    |
|-----------|----------|----------|--------------|--------------|----|
| siR_64631 | 1. 0635  | 0. 2984  | -1. 83350059 | 0. 000528454 | ** |
| siR_64647 | 0. 01    | 18. 3113 | 10. 8385185  | 5. 11E-154   | ** |
| siR_64650 | 0. 01    | 1. 1561  | 6. 85312238  | 2. 05E-10    | ** |
| siR_64655 | 10. 4932 | 3. 7667  | -1. 47808167 | 2. 26E-21    | ** |
| siR_64656 | 4. 5021  | 1. 3799  | -1. 70603438 | 5. 93E-12    | ** |
| siR_64657 | 4. 5376  | 0. 634   | -2. 83937469 | 2. 81E-21    | ** |
| siR_64659 | 62. 4983 | 19. 3182 | -1. 69385627 | 1. 10E-144   | ** |
| siR_64665 | 3. 6513  | 1. 8274  | -0. 99861775 | 4. 13E-05    |    |
| siR_64676 | 0. 8508  | 1. 0069  | 0. 24302847  | 0. 549089802 |    |
| siR_64715 | 1. 2407  | 0. 8205  | -0. 59657908 | 0. 128834839 |    |
| siR_6473  | 2. 3751  | 0. 8205  | -1. 53341302 | 3. 99E-06    | ** |
| siR_64774 | 2. 6942  | 1. 6409  | -0. 71536963 | 0. 008126122 |    |
| siR_64809 | 3. 0132  | 1. 0815  | -1. 47826277 | 4. 09E-07    | ** |
| siR_64818 | 0. 01    | 4. 8109  | 8. 910163    | 5. 22E-41    | ** |
| siR_64854 | 5. 8138  | 1. 0815  | -2. 42644778 | 7. 97E-23    | ** |
| siR_64867 | 3. 545   | 3. 8413  | 0. 11580901  | 0. 566977567 |    |
| siR_64883 | 2. 1624  | 2. 4614  | 0. 18684571  | 0. 465952047 |    |
| siR_64887 | 6. 1683  | 5. 1093  | -0. 27174729 | 0. 099129543 |    |
| siR_64892 | 3. 9704  | 3. 1327  | -0. 34187774 | 0. 100617154 |    |
| siR_64917 | 0. 01    | 3. 6548  | 8. 51364865  | 2. 48E-31    | ** |
| siR_64929 | 3. 4741  | 2. 163   | -0. 68360562 | 0. 00382743  |    |
| siR_64944 | 1. 2053  | 0. 4102  | -1. 55499288 | 0. 000989728 | ** |
| siR_64947 | 0. 01    | 1. 7155  | 7. 42248532  | 4. 25E-15    | ** |
| siR_64952 | 0. 01    | 8. 2047  | 9. 68030677  | 2. 04E-69    | ** |
| siR_64955 | 0. 01    | 7. 9063  | 9. 62685889  | 6. 41E-67    | ** |
| siR_64976 | 1. 3471  | 0. 9323  | -0. 53099078 | 0. 153965443 |    |
| siR_64984 | 1. 2053  | 0. 5967  | -1. 0143146  | 0. 01809496  | *  |
| siR_6499  | 2. 127   | 0. 8205  | -1. 37424479 | 5. 86E-05    | ** |
| siR_64995 | 1. 418   | 0. 5967  | -1. 24877985 | 0. 002405224 | ** |
| siR_65    | 1. 1698  | 0. 5594  | -1. 06430974 | 0. 015477614 | *  |
| siR_65003 | 0. 01    | 5. 706   | 9. 15633594  | 1. 68E-48    | ** |
| siR_65056 | 0. 01    | 1. 0442  | 6. 70625425  | 1. 77E-09    | ** |
| siR_65071 | 0. 01    | 1. 3426  | 7. 06888574  | 5. 63E-12    | ** |
| siR_65108 | 1. 9852  | 1. 0442  | -0. 9268863  | 0. 004648702 |    |
| siR_6511  | 4. 5376  | 2. 536   | -0. 83937469 | 7. 69E-05    |    |
| siR_65116 | 2. 0206  | 1. 4545  | -0. 47426046 | 0. 113692546 |    |
| siR_65135 | 1. 2762  | 0. 8205  | -0. 6372792  | 0. 102225329 |    |
| siR_6514  | 5. 4593  | 1. 1188  | -2. 28676382 | 3. 71E-20    | ** |
| siR_6515  | 1. 3471  | 0. 3729  | -1. 85299625 | 8. 02E-05    | ** |
| siR_65163 | 9. 536   | 6. 9367  | -0. 45913474 | 0. 000787873 |    |
| siR_65164 | 3. 4386  | 3. 2446  | -0. 08378067 | 0. 696617148 |    |
| siR_65179 | 1. 9852  | 1. 6782  | -0. 2423697  | 0. 404871891 |    |
| siR_65182 | 0. 01    | 1. 4918  | 7. 22091032  | 3. 17E-13    | ** |
| siR_65199 | 1. 0635  | 0. 7086  | -0. 58577666 | 0. 167596979 |    |
| siR_65206 | 1. 028   | 0. 7832  | -0. 39238759 | 0. 347659208 |    |
| siR_65207 | 21. 9435 | 6. 5637  | -1. 74121245 | 6. 00E-54    | ** |
| siR_65212 | 1. 3471  | 0. 5967  | -1. 17477927 | 0. 004838592 | ** |

|           |        |         |             |             |    |
|-----------|--------|---------|-------------|-------------|----|
| siR_65220 | 0.01   | 3.2073  | 8.32521549  | 1.38E-27    | ** |
| siR_65223 | 0.01   | 3.3564  | 8.39077085  | 7.81E-29    | ** |
| siR_65235 | 1.1698 | 1.0442  | -0.16386383 | 0.664155115 |    |
| siR_6525  | 0.01   | 1.2307  | 6.94333532  | 4.86E-11    | ** |
| siR_65263 | 1.028  | 1.2307  | 0.25963886  | 0.48054543  |    |
| siR_65269 | 0.319  | 1.0069  | 1.65829208  | 0.001535084 | ** |
| siR_6527  | 0.01   | 2.6479  | 8.04870483  | 6.67E-23    | ** |
| siR_65276 | 0.01   | 41.1724 | 12.00746183 | 0           | ** |
| siR_65282 | 0.01   | 1.9393  | 7.59939219  | 5.69E-17    | ** |
| siR_65288 | 0.01   | 19.7285 | 10.94606555 | 7.00E-166   | ** |
| siR_65295 | 1.4889 | 0.5967  | -1.31916918 | 0.001167472 | ** |
| siR_65349 | 1.1344 | 1.2307  | 0.11754969  | 0.741641213 |    |
| siR_65350 | 0.01   | 2.7225  | 8.08878824  | 1.58E-23    | ** |
| siR_65355 | 0.01   | 13.3139 | 10.37871752 | 3.47E-112   | ** |
| siR_65371 | 1.3116 | 0.4475  | -1.55136822 | 0.000594069 | ** |
| siR_65374 | 0.01   | 18.9453 | 10.88762427 | 2.52E-159   | ** |
| siR_65379 | 0.01   | 23.5697 | 11.20271768 | 4.91E-198   | ** |
| siR_6538  | 1.1344 | 0.5967  | -0.92685176 | 0.033495577 |    |
| siR_65380 | 0.01   | 1.7528  | 7.45351758  | 2.07E-15    | ** |
| siR_65404 | 1.7725 | 2.3495  | 0.40656814  | 0.136478044 |    |
| siR_65405 | 1.9497 | 1.4545  | -0.42272886 | 0.162432979 |    |
| siR_65408 | 2.5169 | 1.0069  | -1.32172749 | 2.15E-05    | ** |
| siR_65440 | 1.1344 | 0.634   | -0.83937469 | 0.050540314 |    |
| siR_65467 | 0.01   | 1.9393  | 7.59939219  | 5.69E-17    | ** |
| siR_65615 | 0.01   | 1.8274  | 7.51364865  | 4.92E-16    | ** |
| siR_65645 | 0.01   | 2.2376  | 7.80580835  | 1.81E-19    | ** |
| siR_65677 | 0.01   | 11.039  | 10.10839377 | 3.83E-93    | ** |
| siR_65707 | 0.01   | 3.5429  | 8.46878694  | 2.15E-30    | ** |
| siR_65770 | 1.8079 | 0.7086  | -1.35127151 | 0.000260129 | ** |
| siR_65792 | 2.446  | 2.3122  | -0.08115821 | 0.751015374 |    |
| siR_65822 | 0.01   | 1.4172  | 7.14689956  | 1.34E-12    | ** |
| siR_65826 | 1.1344 | 0.2238  | -2.3416475  | 2.83E-05    | ** |
| siR_65835 | 4.1831 | 2.5733  | -0.70095283 | 0.001166561 |    |
| siR_65836 | 1.6661 | 0.7086  | -1.23343162 | 0.001096727 | ** |
| siR_65867 | 1.1344 | 0.7086  | -0.67888607 | 0.103795176 |    |
| siR_65888 | 0.01   | 2.7225  | 8.08878824  | 1.58E-23    | ** |
| siR_65975 | 1.3471 | 1.1561  | -0.22059076 | 0.53282973  |    |
| siR_66011 | 1.1698 | 0.3729  | -1.64940119 | 0.000716423 | ** |
| siR_6606  | 1.2762 | 0.2611  | -2.28918008 | 1.13E-05    | ** |
| siR_66086 | 0.4963 | 1.3053  | 1.39509706  | 0.001428773 | ** |
| siR_66089 | 1.9852 | 1.0815  | -0.87625069 | 0.006940346 |    |
| siR_66111 | 1.3825 | 0.8205  | -0.75270424 | 0.048742451 |    |
| siR_66138 | 2.4106 | 1.902   | -0.34187503 | 0.202079159 |    |
| siR_66144 | 0.01   | 11.6357 | 10.18434229 | 3.88E-98    | ** |
| siR_66152 | 0.01   | 3.0208  | 8.23878686  | 5.04E-26    | ** |
| siR_66153 | 0.01   | 1.1561  | 6.85312238  | 2.05E-10    | ** |
| siR_66190 | 0.01   | 12.4189 | 10.27832168 | 1.08E-104   | ** |

|           |          |         |             |             |    |
|-----------|----------|---------|-------------|-------------|----|
| siR_66191 | 0.01     | 5.7805  | 9.17505048  | 3.99E-49    | ** |
| siR_66192 | 0.01     | 1.0069  | 6.6537766   | 3.63E-09    | ** |
| siR_66197 | 0.01     | 5.6314  | 9.13734982  | 7.07E-48    | ** |
| siR_66198 | 0.01     | 5.5568  | 9.11811051  | 2.98E-47    | ** |
| siR_6620  | 5.6365   | 2.797   | -1.01091934 | 2.55E-07    | ** |
| siR_66207 | 0.01     | 2.5733  | 8.00747585  | 2.81E-22    | ** |
| siR_66208 | 0.01     | 2.0139  | 7.65384824  | 1.35E-17    | ** |
| siR_66209 | 0.01     | 1.8274  | 7.51364865  | 4.92E-16    | ** |
| siR_66222 | 0.01     | 4.3634  | 8.76930892  | 2.91E-37    | ** |
| siR_66226 | 0.01     | 5.1838  | 9.01786625  | 3.94E-44    | ** |
| siR_66272 | 2.9423   | 2.1258  | -0.46893848 | 0.058230202 |    |
| siR_66277 | 0.01     | 2.163   | 7.75688986  | 7.63E-19    | ** |
| siR_66278 | 0.01     | 1.0069  | 6.6537766   | 3.63E-09    | ** |
| siR_66281 | 0.01     | 2.0139  | 7.65384824  | 1.35E-17    | ** |
| siR_66289 | 12.6911  | 9.3608  | -0.43911338 | 0.000200502 |    |
| siR_66322 | 1.6307   | 1.3799  | -0.24092767 | 0.453762935 |    |
| siR_66326 | 3.5804   | 3.3192  | -0.10928521 | 0.604790891 |    |
| siR_66393 | 0.01     | 4.1769  | 8.70628879  | 1.06E-35    | ** |
| siR_66401 | 4.3603   | 1.4918  | -1.54737327 | 2.73E-10    | ** |
| siR_66412 | 0.01     | 3.9531  | 8.62684064  | 7.90E-34    | ** |
| siR_66416 | 3.9704   | 3.0581  | -0.37664878 | 0.072172541 |    |
| siR_66440 | 0.01     | 2.0512  | 7.68032436  | 6.59E-18    | ** |
| siR_66443 | 0.01     | 1.1561  | 6.85312238  | 2.05E-10    | ** |
| siR_66494 | 1.9497   | 1.3053  | -0.57887073 | 0.062635311 |    |
| siR_66549 | 1.3116   | 0.5221  | -1.32892974 | 0.002215935 | ** |
| siR_66570 | 2.8005   | 2.0885  | -0.42321728 | 0.092885343 |    |
| siR_66613 | 2.5169   | 1.0442  | -1.26924983 | 3.83E-05    | ** |
| siR_66641 | 1.5598   | 0.8578  | -0.86264784 | 0.018456429 |    |
| siR_66672 | 0.01     | 1.4918  | 7.22091032  | 3.17E-13    | ** |
| siR_667   | 3.864    | 0.2984  | -3.69477565 | 6.08E-23    | ** |
| siR_66776 | 0.01     | 4.5871  | 8.84143855  | 3.90E-39    | ** |
| siR_668   | 163.1407 | 20.5489 | -2.98898368 | 0           | ** |
| siR_66809 | 0.01     | 1.4545  | 7.18437949  | 6.51E-13    | ** |
| siR_66823 | 0.01     | 7.4588  | 9.54279973  | 3.57E-63    | ** |
| siR_66825 | 0.01     | 1.4545  | 7.18437949  | 6.51E-13    | ** |
| siR_6683  | 1.028    | 1.1188  | 0.12211189  | 0.744335346 |    |
| siR_6684  | 7.1963   | 8.6149  | 0.25957872  | 0.061254181 |    |
| siR_66851 | 0.01     | 13.4258 | 10.39079234 | 4.02E-113   | ** |
| siR_66870 | 0.01     | 5.1093  | 8.99698184  | 1.66E-43    | ** |
| siR_66871 | 0.01     | 11.0017 | 10.10351075 | 7.86E-93    | ** |
| siR_66874 | 0.01     | 1.7155  | 7.42248532  | 4.25E-15    | ** |
| siR_66878 | 0.01     | 1.529   | 7.2564446   | 1.55E-13    | ** |
| siR_66880 | 0.01     | 1.9766  | 7.62687714  | 2.78E-17    | ** |
| siR_669   | 2.8005   | 0.2984  | -3.23036499 | 2.79E-15    | ** |
| siR_66904 | 3.3677   | 2.2376  | -0.58981147 | 0.01252401  |    |
| siR_66914 | 4.2894   | 3.2073  | -0.41941655 | 0.038777677 |    |
| siR_66916 | 1.2053   | 0.9323  | -0.37052611 | 0.334212439 |    |

|           |          |          |             |             |    |
|-----------|----------|----------|-------------|-------------|----|
| siR_66925 | 0.3545   | 1.1561   | 1.70540866  | 0.00052143  | ** |
| siR_66929 | 2.7296   | 2.797    | 0.0351907   | 0.878805234 |    |
| siR_6698  | 0.01     | 3.7294   | 8.54279973  | 5.90E-32    | ** |
| siR_66999 | 0.01     | 1.6036   | 7.32517051  | 3.67E-14    | ** |
| siR_6701  | 0.01     | 2.1258   | 7.73186206  | 1.57E-18    | ** |
| siR_67012 | 0.01     | 1.6036   | 7.32517051  | 3.67E-14    | ** |
| siR_67015 | 0.01     | 2.2376   | 7.80580835  | 1.81E-19    | ** |
| siR_67046 | 0.01     | 3.0208   | 8.23878686  | 5.04E-26    | ** |
| siR_67048 | 0.01     | 1.7901   | 7.48389637  | 1.01E-15    | ** |
| siR_6705  | 0.01     | 1.268    | 6.98641094  | 2.37E-11    | ** |
| siR_67058 | 0.01     | 1.8647   | 7.54279973  | 2.40E-16    | ** |
| siR_67063 | 0.01     | 5.3703   | 9.06885887  | 1.08E-45    | ** |
| siR_67068 | 0.01     | 20.3625  | 10.99169898 | 3.45E-171   | ** |
| siR_67117 | 2.2688   | 0.7832   | -1.53447677 | 6.54E-06    | ** |
| siR_67132 | 4.3249   | 1.6036   | -1.43135245 | 2.95E-09    | ** |
| siR_67135 | 24.3541  | 10.2931  | -1.24248712 | 7.92E-37    | ** |
| siR_67137 | 1.418    | 0.3729   | -1.92699683 | 3.23E-05    | ** |
| siR_67145 | 1.6307   | 1.2307   | -0.40601227 | 0.219358974 |    |
| siR_67164 | 17.7604  | 11.039   | -0.68605459 | 4.55E-11    |    |
| siR_67177 | 874.6213 | 330.7966 | -1.40271408 | 0           | ** |
| siR_67178 | 14.3927  | 5.4449   | -1.4023598  | 1.11E-26    | ** |
| siR_67179 | 3.6513   | 1.2307   | -1.56893108 | 5.52E-09    | ** |
| siR_67198 | 1.2407   | 0.8205   | -0.59657908 | 0.128834839 |    |
| siR_67200 | 0.01     | 8.5776   | 9.74443023  | 1.54E-72    | ** |
| siR_67203 | 86.4979  | 96.4046  | 0.15643688  | 0.000121639 |    |
| siR_67208 | 62.9237  | 59.6702  | -0.07659289 | 0.123605308 |    |
| siR_67214 | 0.01     | 2.0885   | 7.70632333  | 3.21E-18    | ** |
| siR_67220 | 13.5419  | 8.8759   | -0.60946485 | 2.28E-07    |    |
| siR_6724  | 38.5341  | 29.7232  | -0.37454625 | 2.22E-08    |    |
| siR_67242 | 1.9852   | 1.0442   | -0.9268863  | 0.004648702 |    |
| siR_67247 | 3.6159   | 2.9462   | -0.29549941 | 0.172433921 |    |
| siR_67251 | 1.7016   | 1.3053   | -0.38251052 | 0.235099543 |    |
| siR_67271 | 1.0635   | 1.0069   | -0.07889962 | 0.841808282 |    |
| siR_67278 | 1.0989   | 0.5594   | -0.97410795 | 0.02925074  |    |
| siR_6728  | 12.7974  | 8.6149   | -0.57094478 | 2.09E-06    |    |
| siR_67280 | 2.6942   | 1.6036   | -0.74854263 | 0.005896452 |    |
| siR_67285 | 0.9926   | 1.1188   | 0.1726678   | 0.648691016 |    |
| siR_67289 | 0.01     | 3.3192   | 8.37469175  | 1.60E-28    | ** |
| siR_6729  | 8.4016   | 3.9531   | -1.08767965 | 2.28E-11    | ** |
| siR_67290 | 0.01     | 7.8317   | 9.61318169  | 2.70E-66    | ** |
| siR_67298 | 38.1087  | 16.372   | -1.21888982 | 4.93E-55    | ** |
| siR_67305 | 0.01     | 17.6773  | 10.78768222 | 1.04E-148   | ** |
| siR_67309 | 2.9423   | 0.8578   | -1.77823113 | 1.11E-08    | ** |
| siR_67321 | 0.01     | 30.2453  | 11.56249526 | 6.46E-254   | ** |
| siR_67324 | 0.01     | 1.8274   | 7.51364865  | 4.92E-16    | ** |
| siR_67327 | 1.3116   | 1.2307   | -0.09184868 | 0.79488141  |    |
| siR_67331 | 1.028    | 0.2984   | -1.78452082 | 0.000827671 | ** |

|           |         |         |             |             |    |
|-----------|---------|---------|-------------|-------------|----|
| siR_67353 | 0.01    | 11.0017 | 10.10351075 | 7.86E-93    | ** |
| siR_67354 | 0.01    | 1.9393  | 7.59939219  | 5.69E-17    | ** |
| siR_67361 | 0.01    | 1.529   | 7.2564446   | 1.55E-13    | ** |
| siR_67378 | 0.01    | 1.0442  | 6.70625425  | 1.77E-09    | ** |
| siR_67387 | 0.6735  | 1.0815  | 0.68328381  | 0.107636281 |    |
| siR_67399 | 5.6365  | 5.333   | -0.07985227 | 0.632919381 |    |
| siR_67401 | 0.01    | 1.1188  | 6.80580835  | 4.20E-10    | ** |
| siR_6741  | 0.01    | 2.0139  | 7.65384824  | 1.35E-17    | ** |
| siR_67467 | 5.5656  | 3.4683  | -0.68230853 | 0.000251168 |    |
| siR_67471 | 24.2478 | 11.039  | -1.13524437 | 5.23E-32    | ** |
| siR_67476 | 7.2318  | 2.8716  | -1.33249998 | 3.33E-13    | ** |
| siR_67478 | 1.2053  | 1.0069  | -0.25947187 | 0.491104458 |    |
| siR_67481 | 11.2022 | 5.7433  | -0.96383026 | 2.64E-12    |    |
| siR_6749  | 0.01    | 1.3799  | 7.10841991  | 2.74E-12    | ** |
| siR_67498 | 1.7725  | 0.7459  | -1.2487315  | 0.000669599 | ** |
| siR_67500 | 2.5878  | 3.804   | 0.55579112  | 0.011534804 |    |
| siR_67522 | 0.01    | 1.6036  | 7.32517051  | 3.67E-14    | ** |
| siR_67531 | 1.5952  | 1.6782  | 0.07317734  | 0.808385879 |    |
| siR_67596 | 1.028   | 0.9696  | -0.08437866 | 0.833764704 |    |
| siR_676   | 0.01    | 1.0815  | 6.75688986  | 8.62E-10    | ** |
| siR_67603 | 39.7748 | 23.1968 | -0.77792888 | 3.73E-28    |    |
| siR_67606 | 2.836   | 0.6713  | -2.07882798 | 4.91E-10    | ** |
| siR_6762  | 2.836   | 1.6036  | -0.82254321 | 0.002174454 |    |
| siR_67623 | 1.4889  | 0.3729  | -1.99738616 | 1.28E-05    | ** |
| siR_67652 | 1.9852  | 0.8205  | -1.27470912 | 0.000250074 | ** |
| siR_67653 | 5.4947  | 4.1769  | -0.39560811 | 0.026614752 |    |
| siR_67654 | 1.4889  | 1.6782  | 0.1726678   | 0.576831629 |    |
| siR_67656 | 10.5641 | 5.8178  | -0.86062426 | 6.59E-10    |    |
| siR_67674 | 2.2333  | 0.7459  | -1.58212293 | 4.81E-06    | ** |
| siR_67675 | 1.0635  | 0.7086  | -0.58577666 | 0.167596979 |    |
| siR_67682 | 0.01    | 1.3799  | 7.10841991  | 2.74E-12    | ** |
| siR_67698 | 1.0635  | 0.2984  | -1.83350059 | 0.000528454 | ** |
| siR_67699 | 1.7725  | 0.4102  | -2.11138623 | 7.60E-07    | ** |
| siR_67709 | 0.01    | 2.0885  | 7.70632333  | 3.21E-18    | ** |
| siR_67711 | 0.01    | 1.1188  | 6.80580835  | 4.20E-10    | ** |
| siR_67715 | 0.01    | 1.8647  | 7.54279973  | 2.40E-16    | ** |
| siR_6775  | 0.01    | 1.0069  | 6.6537766   | 3.63E-09    | ** |
| siR_67766 | 2.127   | 1.0442  | -1.02642197 | 0.001422645 | ** |
| siR_67769 | 1.1344  | 0.5221  | -1.11953137 | 0.013060942 | *  |
| siR_67776 | 3.864   | 1.9766  | -0.96707415 | 3.98E-05    |    |
| siR_67828 | 0.01    | 5.2957  | 9.04867759  | 4.56E-45    | ** |
| siR_67829 | 0.01    | 1.0815  | 6.75688986  | 8.62E-10    | ** |
| siR_67833 | 0.01    | 24.5021 | 11.25868969 | 7.70E-206   | ** |
| siR_6784  | 3.7931  | 1.3053  | -1.53899598 | 4.59E-09    | ** |
| siR_67842 | 0.01    | 13.575  | 10.40673648 | 2.27E-114   | ** |
| siR_67847 | 0.01    | 2.8716  | 8.16571099  | 8.93E-25    | ** |
| siR_67851 | 0.01    | 2.9835  | 8.22086197  | 1.03E-25    | ** |

|           |          |          |             |             |    |
|-----------|----------|----------|-------------|-------------|----|
| siR_67892 | 0.2481   | 1.6036   | 2.69232068  | 4.63E-08    | ** |
| siR_67909 | 0.01     | 1.0815   | 6.75688986  | 8.62E-10    | ** |
| siR_67912 | 0.01     | 1.0069   | 6.6537766   | 3.63E-09    | ** |
| siR_67930 | 3.4386   | 1.3053   | -1.39743988 | 2.09E-07    | ** |
| siR_67932 | 7.0545   | 2.0139   | -1.80855178 | 2.59E-19    | ** |
| siR_6795  | 0.01     | 1.5663   | 7.29121675  | 7.54E-14    | ** |
| siR_67968 | 1.2407   | 0.8578   | -0.53244109 | 0.170484507 |    |
| siR_68032 | 1.1344   | 0.634    | -0.83937469 | 0.050540314 |    |
| siR_68072 | 2.1979   | 1.529    | -0.52353734 | 0.070846062 |    |
| siR_68091 | 0.01     | 2.6479   | 8.04870483  | 6.67E-23    | ** |
| siR_68092 | 0.01     | 1.268    | 6.98641094  | 2.37E-11    | ** |
| siR_681   | 0.01     | 3.5802   | 8.48389637  | 1.05E-30    | ** |
| siR_68140 | 0.01     | 1.5663   | 7.29121675  | 7.54E-14    | ** |
| siR_68144 | 0.01     | 1.6036   | 7.32517051  | 3.67E-14    | ** |
| siR_68150 | 0.01     | 1.1188   | 6.80580835  | 4.20E-10    | ** |
| siR_68153 | 0.01     | 1.3426   | 7.06888574  | 5.63E-12    | ** |
| siR_68199 | 2.9778   | 1.529    | -0.96165845 | 0.000337272 |    |
| siR_68207 | 1.0989   | 0.2611   | -2.07338574 | 0.000132441 | ** |
| siR_68220 | 7.9408   | 2.2003   | -1.85158412 | 3.32E-22    | ** |
| siR_68221 | 1.3471   | 0.7459   | -0.85280282 | 0.030399374 |    |
| siR_68228 | 8.9688   | 3.0208   | -1.5699843  | 4.68E-20    | ** |
| siR_68231 | 2.5878   | 0.9696   | -1.41626452 | 5.60E-06    | ** |
| siR_68239 | 32.7558  | 10.3677  | -1.65965451 | 1.42E-74    | ** |
| siR_68242 | 32.7203  | 8.8759   | -1.88222066 | 2.28E-88    | ** |
| siR_68244 | 0.01     | 6.0789   | 9.24766648  | 1.27E-51    | ** |
| siR_68245 | 5.282    | 1.7155   | -1.62245518 | 6.17E-13    | ** |
| siR_68286 | 0.01     | 1.0815   | 6.75688986  | 8.62E-10    | ** |
| siR_68287 | 1.9852   | 1.1934   | -0.73420668 | 0.020388005 |    |
| siR_68389 | 1.3825   | 1.0815   | -0.35424582 | 0.320433043 |    |
| siR_68411 | 0.01     | 9.2116   | 9.84730796  | 7.59E-78    | ** |
| siR_68412 | 31.1251  | 29.947   | -0.05566699 | 0.429932135 |    |
| siR_68417 | 4.6794   | 5.5568   | 0.24793076  | 0.150326768 |    |
| siR_68422 | 2.127    | 1.8274   | -0.21902757 | 0.43382872  |    |
| siR_68424 | 5.8847   | 3.3192   | -0.82613331 | 8.76E-06    |    |
| siR_68438 | 4.4312   | 0.8951   | -2.30757667 | 8.57E-17    | ** |
| siR_68439 | 3.1196   | 0.5967   | -2.38628337 | 1.16E-12    | ** |
| siR_68444 | 1.6307   | 0.5221   | -1.64309333 | 6.28E-05    | ** |
| siR_68462 | 0.01     | 1.4545   | 7.18437949  | 6.51E-13    | ** |
| siR_68465 | 3.4032   | 1.268    | -1.42433719 | 1.62E-07    | ** |
| siR_68470 | 0.01     | 3.7294   | 8.54279973  | 5.90E-32    | ** |
| siR_68475 | 0.01     | 1.6409   | 7.35834351  | 1.79E-14    | ** |
| siR_68498 | 0.01     | 8.503    | 9.73182813  | 6.48E-72    | ** |
| siR_685   | 0.01     | 2.9835   | 8.22086197  | 1.03E-25    | ** |
| siR_68501 | 0.01     | 3.0581   | 8.25649177  | 2.46E-26    | ** |
| siR_68507 | 567.4829 | 312.2615 | -0.86182222 | 0           |    |
| siR_68517 | 2.5524   | 2.6852   | 0.07317511  | 0.759752035 |    |
| siR_68529 | 1.737    | 0.7459   | -1.21954362 | 0.000949182 | ** |



|           |           |          |              |              |    |
|-----------|-----------|----------|--------------|--------------|----|
| siR_68534 | 2. 5169   | 1. 0442  | -1. 26924983 | 3. 83E-05    | ** |
| siR_68536 | 26. 552   | 10. 7779 | -1. 30074443 | 7. 86E-43    | ** |
| siR_68537 | 1. 028    | 0. 4475  | -1. 19988068 | 0. 012673013 | *  |
| siR_68541 | 1. 3471   | 1. 0442  | -0. 36745889 | 0. 310306368 |    |
| siR_68544 | 2. 0561   | 0. 4475  | -2. 19995085 | 4. 39E-08    | ** |
| siR_68545 | 2. 127    | 2. 0512  | -0. 05235187 | 0. 84899572  |    |
| siR_68566 | 0. 01     | 45. 5731 | 12. 15396679 | 0            | ** |
| siR_68569 | 0. 01     | 1. 4545  | 7. 18437949  | 6. 51E-13    | ** |
| siR_68574 | 1. 737    | 1. 3053  | -0. 41221633 | 0. 198218358 |    |
| siR_68581 | 4. 4667   | 0. 7832  | -2. 51175669 | 1. 57E-18    | ** |
| siR_68596 | 0. 01     | 16. 9314 | 10. 72548555 | 1. 82E-142   | ** |
| siR_68606 | 0. 01     | 4. 2142  | 8. 71911497  | 5. 16E-36    | ** |
| siR_68612 | 10. 954   | 5. 4076  | -1. 01839744 | 4. 49E-13    | ** |
| siR_68613 | 7. 9408   | 3. 3192  | -1. 2584488  | 2. 87E-13    | ** |
| siR_68614 | 2. 446    | 1. 9393  | -0. 33488841 | 0. 207494065 |    |
| siR_68619 | 0. 01     | 3. 431   | 8. 42248532  | 1. 85E-29    | ** |
| siR_68626 | 0. 01     | 3. 0954  | 8. 27398204  | 1. 20E-26    | ** |
| siR_68631 | 0. 01     | 4. 2142  | 8. 71911497  | 5. 16E-36    | ** |
| siR_68633 | 0. 01     | 4. 0277  | 8. 65381242  | 1. 88E-34    | ** |
| siR_68636 | 0. 01     | 1. 7155  | 7. 42248532  | 4. 25E-15    | ** |
| siR_68649 | 2. 5878   | 1. 1561  | -1. 16245993 | 9. 75E-05    | ** |
| siR_68654 | 1. 2053   | 0. 8951  | -0. 42927151 | 0. 267810892 |    |
| siR_68666 | 1. 3116   | 0. 634   | -1. 04877306 | 0. 011177638 | *  |
| siR_68667 | 19. 8874  | 7. 4961  | -1. 40764257 | 1. 88E-36    | ** |
| siR_68669 | 24. 4605  | 6. 9367  | -1. 8181325  | 1. 58E-63    | ** |
| siR_68688 | 2. 5169   | 2. 4614  | -0. 03216877 | 0. 898852814 |    |
| siR_68707 | 1. 0635   | 0. 2984  | -1. 83350059 | 0. 000528454 | ** |
| siR_68708 | 93. 836   | 32. 6321 | -1. 52384968 | 6. 45E-186   | ** |
| siR_68709 | 1. 3116   | 0. 4102  | -1. 67692841 | 0. 000282277 | ** |
| siR_68711 | 196. 0382 | 60. 0804 | -1. 70616848 | 0            | ** |
| siR_68712 | 1. 1698   | 0. 2238  | -2. 38597995 | 1. 70E-05    | ** |
| siR_68719 | 10. 8831  | 2. 6106  | -2. 05963623 | 3. 81E-34    | ** |
| siR_68724 | 0. 6381   | 1. 1188  | 0. 81009772  | 0. 057753332 |    |
| siR_68727 | 0. 01     | 5. 8551  | 9. 19355     | 9. 47E-50    | ** |
| siR_68738 | 1. 8434   | 0. 7086  | -1. 37932579 | 0. 000179389 | ** |
| siR_68761 | 14. 7472  | 9. 9575  | -0. 56658558 | 4. 21E-07    |    |
| siR_68765 | 1. 737    | 1. 3426  | -0. 37156821 | 0. 242862306 |    |
| siR_6877  | 0. 01     | 1. 1561  | 6. 85312238  | 2. 05E-10    | ** |
| siR_68771 | 1. 028    | 0. 1492  | -2. 78452082 | 1. 19E-05    | ** |
| siR_68774 | 13. 1165  | 6. 3773  | -1. 04036515 | 7. 37E-16    | ** |
| siR_68784 | 1. 0989   | 0. 2984  | -1. 88074067 | 0. 000335467 | ** |
| siR_68786 | 0. 01     | 1. 3053  | 7. 02823761  | 1. 15E-11    | ** |
| siR_68797 | 0. 01     | 4. 5871  | 8. 84143855  | 3. 90E-39    | ** |
| siR_68802 | 7. 8344   | 5. 8178  | -0. 42934909 | 0. 004249828 |    |
| siR_68803 | 5. 5656   | 3. 3937  | -0. 71367819 | 0. 000139848 |    |
| siR_68812 | 0. 01     | 3. 5802  | 8. 48389637  | 1. 05E-30    | ** |
| siR_68814 | 0. 01     | 12. 941  | 10. 33773339 | 4. 59E-109   | ** |

|           |         |         |             |             |    |
|-----------|---------|---------|-------------|-------------|----|
| siR_68818 | 0.01    | 14.9548 | 10.5463929  | 6.38E-126   | ** |
| siR_68821 | 0.01    | 1.1561  | 6.85312238  | 2.05E-10    | ** |
| siR_68823 | 0.01    | 2.6479  | 8.04870483  | 6.67E-23    | ** |
| siR_68837 | 4.1476  | 2.5733  | -0.68865711 | 0.00145644  |    |
| siR_68842 | 0.01    | 1.4545  | 7.18437949  | 6.51E-13    | ** |
| siR_68851 | 0.01    | 7.5707  | 9.56428289  | 4.13E-64    | ** |
| siR_68856 | 0.01    | 1.8274  | 7.51364865  | 4.92E-16    | ** |
| siR_68886 | 2.2333  | 1.1561  | -0.94991087 | 0.002159771 |    |
| siR_68891 | 0.01    | 8.3538  | 9.70628879  | 1.15E-70    | ** |
| siR_68896 | 2.8714  | 1.3799  | -1.0571906  | 0.000141669 | ** |
| siR_68899 | 0.01    | 2.3495  | 7.87620996  | 2.10E-20    | ** |
| siR_68922 | 8.2244  | 2.8343  | -1.53691796 | 5.38E-18    | ** |
| siR_68926 | 2.7296  | 1.0442  | -1.38629149 | 4.41E-06    | ** |
| siR_68927 | 3.4032  | 1.4172  | -1.26384857 | 1.74E-06    | ** |
| siR_68929 | 2.1979  | 0.8951  | -1.29600497 | 9.36E-05    | ** |
| siR_68941 | 0.01    | 2.4614  | 7.94333532  | 2.43E-21    | ** |
| siR_68949 | 3.4032  | 0.5967  | -2.51181426 | 1.93E-14    | ** |
| siR_68955 | 0.01    | 1.5663  | 7.29121675  | 7.54E-14    | ** |
| siR_68958 | 0.0354  | 1.2307  | 5.11958596  | 8.96E-10    | ** |
| siR_68960 | 2.9069  | 3.3564  | 0.20743322  | 0.346217323 |    |
| siR_68967 | 5.7429  | 2.2003  | -1.3840792  | 2.48E-11    | ** |
| siR_68973 | 4.3958  | 2.4241  | -0.85867653 | 7.27E-05    |    |
| siR_68984 | 1.2053  | 0.3356  | -1.84457766 | 0.000205328 | ** |
| siR_68988 | 1.4889  | 0.6713  | -1.14921731 | 0.003563263 | ** |
| siR_68993 | 0.01    | 1.6036  | 7.32517051  | 3.67E-14    | ** |
| siR_68996 | 0.01    | 2.797   | 8.12773644  | 3.76E-24    | ** |
| siR_68997 | 0.01    | 1.2307  | 6.94333532  | 4.86E-11    | ** |
| siR_690   | 0.01    | 1.5663  | 7.29121675  | 7.54E-14    | ** |
| siR_69005 | 0.01    | 1.8274  | 7.51364865  | 4.92E-16    | ** |
| siR_69010 | 3.864   | 3.3192  | -0.21925953 | 0.288847584 |    |
| siR_69012 | 0.01    | 1.3426  | 7.06888574  | 5.63E-12    | ** |
| siR_69022 | 1.737   | 0.7459  | -1.21954362 | 0.000949182 | ** |
| siR_69036 | 16.5197 | 6.2281  | -1.40732347 | 1.52E-30    | ** |
| siR_69060 | 4.8212  | 3.3937  | -0.50653324 | 0.009131541 |    |
| siR_69070 | 0.01    | 1.4918  | 7.22091032  | 3.17E-13    | ** |
| siR_69073 | 0.01    | 6.3027  | 9.29982618  | 1.70E-53    | ** |
| siR_69086 | 3.6159  | 2.1258  | -0.76634891 | 0.001110334 |    |
| siR_69094 | 0.01    | 1.2307  | 6.94333532  | 4.86E-11    | ** |
| siR_691   | 0.01    | 1.529   | 7.2564446   | 1.55E-13    | ** |
| siR_69102 | 0.01    | 1.6409  | 7.35834351  | 1.79E-14    | ** |
| siR_69114 | 27.2256 | 21.8915 | -0.31459303 | 6.60E-05    |    |
| siR_69121 | 8.6852  | 5.4822  | -0.66380411 | 7.87E-06    |    |
| siR_69122 | 4.3958  | 5.1466  | 0.22749391  | 0.202419748 |    |
| siR_69125 | 1.5598  | 2.2003  | 0.49633919  | 0.083445939 |    |
| siR_69152 | 1.0989  | 0.8205  | -0.42148487 | 0.29881012  |    |
| siR_69159 | 30.2388 | 13.6123 | -1.15149004 | 2.24E-40    | ** |
| siR_69167 | 8.4016  | 4.2142  | -0.99540532 | 4.99E-10    |    |

|           |         |          |             |             |    |
|-----------|---------|----------|-------------|-------------|----|
| siR_69176 | 0.3545  | 1.1188   | 1.65809463  | 0.000824355 | ** |
| siR_69187 | 0.01    | 3.8413   | 8.58545083  | 6.83E-33    | ** |
| siR_69189 | 4.7503  | 2.4614   | -0.9485395  | 7.26E-06    |    |
| siR_69202 | 1.7016  | 0.7459   | -1.18983781 | 0.001338714 | ** |
| siR_6922  | 5.9556  | 3.2819   | -0.85971558 | 3.71E-06    |    |
| siR_69241 | 0.01    | 105.0568 | 13.35888193 | 0           | ** |
| siR_69242 | 0.01    | 13.3885  | 10.38677862 | 8.24E-113   | ** |
| siR_69243 | 0.01    | 2.7225   | 8.08878824  | 1.58E-23    | ** |
| siR_69244 | 0.01    | 1.0442   | 6.70625425  | 1.77E-09    | ** |
| siR_69257 | 0.01    | 4.065    | 8.66711154  | 9.14E-35    | ** |
| siR_69261 | 10.1032 | 3.2446   | -1.63869978 | 9.96E-24    | ** |
| siR_69294 | 1.028   | 1.0069   | -0.02991985 | 0.942343409 |    |
| siR_69296 | 1.028   | 0.6713   | -0.61481072 | 0.156712209 |    |
| siR_69313 | 1.9143  | 1.3053   | -0.55243552 | 0.077017621 |    |
| siR_69347 | 1.5952  | 2.0139   | 0.33625473  | 0.248549433 |    |
| siR_6935  | 1.1344  | 0.0746   | -3.92661    | 7.99E-08    | ** |
| siR_69373 | 0.01    | 1.1561   | 6.85312238  | 2.05E-10    | ** |
| siR_69401 | 1.5598  | 0.8578   | -0.86264784 | 0.018456429 |    |
| siR_69409 | 21.4827 | 17.4162  | -0.30274545 | 0.000632175 |    |
| siR_69414 | 15.4562 | 5.8178   | -1.40964006 | 9.51E-29    | ** |
| siR_69435 | 2.6233  | 1.1561   | -1.18211661 | 7.00E-05    | ** |
| siR_6945  | 6.7355  | 2.6106   | -1.36740362 | 7.76E-13    | ** |
| siR_69451 | 1.3825  | 0.634    | -1.12472473 | 0.005814363 | ** |
| siR_69454 | 1.1344  | 0.9323   | -0.28306327 | 0.468279224 |    |
| siR_69467 | 53.7067 | 24.6512  | -1.1234442  | 1.07E-67    | ** |
| siR_69481 | 1.9497  | 1.0069   | -0.95333174 | 0.004087468 |    |
| siR_69499 | 0.01    | 1.6782   | 7.39077085  | 8.72E-15    | ** |
| siR_69529 | 8.9334  | 4.3634   | -1.03375663 | 3.68E-11    | ** |
| siR_69533 | 2.0561  | 1.1561   | -0.83064424 | 0.00863454  |    |
| siR_69544 | 0.01    | 3.7667   | 8.55715732  | 2.87E-32    | ** |
| siR_69591 | 1.028   | 0.3356   | -1.61502564 | 0.001825058 | ** |
| siR_696   | 0.01    | 11.4492  | 10.16103108 | 1.41E-96    | ** |
| siR_69624 | 0.01    | 4.0277   | 8.65381242  | 1.88E-34    | ** |
| siR_69637 | 2.7651  | 1.7155   | -0.68870253 | 0.009488564 |    |
| siR_69639 | 22.0853 | 7.6452   | -1.53046028 | 2.05E-45    | ** |
| siR_6969  | 1.2053  | 0.5594   | -1.10744012 | 0.01113063  | *  |
| siR_697   | 0.01    | 10.8525  | 10.08381171 | 1.39E-91    | ** |
| siR_69726 | 1.1344  | 0.2238   | -2.3416475  | 2.83E-05    | ** |
| siR_69734 | 3.9704  | 1.9393   | -1.03374836 | 1.08E-05    | ** |
| siR_6974  | 1.4534  | 0.9323   | -0.64056564 | 0.079347154 |    |
| siR_69743 | 0.01    | 1.3053   | 7.02823761  | 1.15E-11    | ** |
| siR_69779 | 0.01    | 1.3799   | 7.10841991  | 2.74E-12    | ** |
| siR_69783 | 0.01    | 52.4725  | 12.35734581 | 0           | ** |
| siR_69784 | 0.01    | 2.7225   | 8.08878824  | 1.58E-23    | ** |
| siR_69792 | 0.01    | 1.2307   | 6.94333532  | 4.86E-11    | ** |
| siR_69797 | 0.01    | 1.5663   | 7.29121675  | 7.54E-14    | ** |
| siR_698   | 0.01    | 1.0442   | 6.70625425  | 1.77E-09    | ** |

|           |          |         |             |             |    |
|-----------|----------|---------|-------------|-------------|----|
| siR_69800 | 0.01     | 15.9991 | 10.64377504 | 1.16E-134   | ** |
| siR_69806 | 0.01     | 14.5073 | 10.50256332 | 3.55E-122   | ** |
| siR_69811 | 0.01     | 22.1153 | 11.1108291  | 7.34E-186   | ** |
| siR_69814 | 0.01     | 2.0139  | 7.65384824  | 1.35E-17    | ** |
| siR_69823 | 0.01     | 3.0208  | 8.23878686  | 5.04E-26    | ** |
| siR_69824 | 0.01     | 2.7597  | 8.10836763  | 7.72E-24    | ** |
| siR_69828 | 0.01     | 1.9393  | 7.59939219  | 5.69E-17    | ** |
| siR_69836 | 21.0573  | 17.2298 | -0.28941451 | 0.00118717  |    |
| siR_69844 | 1.6661   | 0.5594  | -1.57452284 | 8.69E-05    | ** |
| siR_69857 | 35.5209  | 33.0051 | -0.10597917 | 0.111339983 |    |
| siR_69868 | 0.01     | 1.0069  | 6.6537766   | 3.63E-09    | ** |
| siR_69871 | 9.926    | 4.1023  | -1.27477945 | 1.61E-16    | ** |
| siR_69900 | 0.9571   | 2.1258  | 1.1512643   | 0.000434659 | ** |
| siR_69905 | 1.5243   | 0.5967  | -1.35306919 | 0.000806564 | ** |
| siR_69920 | 30.8769  | 10.1439 | -1.60591549 | 3.09E-67    | ** |
| siR_69923 | 3.155    | 2.0139  | -0.64764796 | 0.008625998 |    |
| siR_6993  | 0.01     | 1.3799  | 7.10841991  | 2.74E-12    | ** |
| siR_69957 | 0.01     | 81.6363 | 12.99499508 | 0           | ** |
| siR_69958 | 0.01     | 19.542  | 10.93236241 | 2.55E-164   | ** |
| siR_69959 | 0.01     | 7.1604  | 9.48389637  | 1.12E-60    | ** |
| siR_69960 | 0.01     | 5.9297  | 9.21181531  | 2.25E-50    | ** |
| siR_69961 | 0.01     | 1.6036  | 7.32517051  | 3.67E-14    | ** |
| siR_69962 | 0.01     | 1.0815  | 6.75688986  | 8.62E-10    | ** |
| siR_69975 | 29.4235  | 20.1014 | -0.54967288 | 3.48E-12    |    |
| siR_69981 | 0.01     | 11.6357 | 10.18434229 | 3.88E-98    | ** |
| siR_70057 | 0.01     | 1.1188  | 6.80580835  | 4.20E-10    | ** |
| siR_70068 | 1.2053   | 0.7459  | -0.69233815 | 0.087734995 |    |
| siR_70071 | 0.01     | 6.0043  | 9.22985225  | 5.34E-51    | ** |
| siR_70078 | 40.6965  | 23.98   | -0.76307307 | 7.04E-28    |    |
| siR_70082 | 11.3794  | 4.4753  | -1.34636819 | 3.14E-20    | ** |
| siR_70087 | 0.01     | 2.4987  | 7.96503389  | 1.18E-21    | ** |
| siR_70093 | 2.3751   | 0.3729  | -2.67112756 | 4.15E-11    | ** |
| siR_70107 | 9.1815   | 3.4683  | -1.40450117 | 1.30E-17    | ** |
| siR_70136 | 0.01     | 1.0815  | 6.75688986  | 8.62E-10    | ** |
| siR_70167 | 2.4815   | 1.4918  | -0.73415832 | 0.00939932  |    |
| siR_70168 | 0.01     | 1.0815  | 6.75688986  | 8.62E-10    | ** |
| siR_70173 | 23.1134  | 12.8291 | -0.84930953 | 1.56E-19    |    |
| siR_70176 | 5.1402   | 6.601   | 0.3608601   | 0.025271021 |    |
| siR_7020  | 1.0989   | 0.5221  | -1.07366204 | 0.018227899 | *  |
| siR_70207 | 1.7016   | 0.8951  | -0.92677117 | 0.008876687 |    |
| siR_70219 | 2.3751   | 1.4918  | -0.67093413 | 0.018909397 |    |
| siR_70221 | 105.7827 | 56.2019 | -0.9124129  | 6.08E-94    |    |
| siR_70224 | 3.1196   | 1.8647  | -0.74241751 | 0.003235838 |    |
| siR_70228 | 3.6159   | 1.6782  | -1.10744012 | 9.03E-06    | ** |
| siR_70229 | 4.8566   | 2.3495  | -1.0475929  | 8.48E-07    | ** |
| siR_70231 | 36.7971  | 13.3885 | -1.45859774 | 1.63E-69    | ** |
| siR_70258 | 1.1698   | 0.7832  | -0.57880922 | 0.151563912 |    |

|           |         |         |             |             |    |
|-----------|---------|---------|-------------|-------------|----|
| siR_70273 | 2.6942  | 1.7901  | -0.58981677 | 0.025702861 |    |
| siR_70286 | 1.0989  | 0.5221  | -1.07366204 | 0.018227899 | *  |
| siR_70287 | 0.01    | 6.4518  | 9.33355791  | 9.59E-55    | ** |
| siR_70312 | 0.01    | 3.9159  | 8.61320011  | 1.62E-33    | ** |
| siR_70318 | 9.3588  | 10.3677 | 0.14770042  | 0.233350101 |    |
| siR_70322 | 2.9778  | 0.5594  | -2.4122947  | 2.79E-12    | ** |
| siR_70347 | 0.01    | 29.6113 | 11.53193211 | 1.31E-248   | ** |
| siR_70351 | 0.01    | 7.7571  | 9.59937359  | 1.14E-65    | ** |
| siR_70376 | 9.4297  | 3.0581  | -1.62457629 | 5.41E-22    | ** |
| siR_7038  | 2.7651  | 2.1258  | -0.37932579 | 0.13162847  |    |
| siR_70380 | 1.5243  | 0.5967  | -1.35306919 | 0.000806564 | ** |
| siR_70397 | 11.0604 | 4.4007  | -1.32959863 | 2.33E-19    | ** |
| siR_7045  | 7.0191  | 2.1258  | -1.72328019 | 4.45E-18    | ** |
| siR_70473 | 1.6307  | 1.1934  | -0.45041371 | 0.176306369 |    |
| siR_70480 | 1.8788  | 0.634   | -1.56725675 | 3.20E-05    | ** |
| siR_70509 | 4.1476  | 1.6036  | -1.37096244 | 1.86E-08    | ** |
| siR_70511 | 1.4889  | 0.3729  | -1.99738616 | 1.28E-05    | ** |
| siR_70514 | 1.8788  | 2.7597  | 0.55469995  | 0.031875399 |    |
| siR_70539 | 1.3116  | 0.6713  | -0.96629826 | 0.017699245 |    |
| siR_70542 | 3.0132  | 1.4172  | -1.08825306 | 6.55E-05    | ** |
| siR_70544 | 17.0869 | 8.9878  | -0.92685075 | 5.94E-17    |    |
| siR_70546 | 1.0635  | 0.3356  | -1.66400541 | 0.001193189 | ** |
| siR_70563 | 32.5076 | 22.3763 | -0.53880555 | 6.87E-13    |    |
| siR_70565 | 8.2598  | 4.6617  | -0.82525069 | 1.39E-07    |    |
| siR_70572 | 1.028   | 0.2611  | -1.9771659  | 0.000342937 | ** |
| siR_70585 | 0.01    | 3.7667  | 8.55715732  | 2.87E-32    | ** |
| siR_70614 | 4.7148  | 2.163   | -1.12416291 | 2.80E-07    | ** |
| siR_70677 | 2.1624  | 1.1188  | -0.95068126 | 0.002531703 |    |
| siR_70684 | 0.01    | 1.7901  | 7.48389637  | 1.01E-15    | ** |
| siR_70733 | 7.0191  | 2.9089  | -1.27081236 | 4.71E-12    | ** |
| siR_70738 | 11.5921 | 5.333   | -1.12012271 | 8.40E-16    | ** |
| siR_7074  | 1.3471  | 1.0069  | -0.41993654 | 0.250464973 |    |
| siR_70742 | 2.5524  | 1.0069  | -1.34193403 | 1.50E-05    | ** |
| siR_70747 | 10.5286 | 3.804   | -1.46872446 | 2.97E-21    | ** |
| siR_70760 | 0.01    | 1.4172  | 7.14689956  | 1.34E-12    | ** |
| siR_70775 | 1.2762  | 0.5967  | -1.09677676 | 0.009487354 | ** |
| siR_70779 | 1.3471  | 1.0815  | -0.31682329 | 0.37768126  |    |
| siR_70796 | 2.4815  | 2.6479  | 0.09363618  | 0.699119457 |    |
| siR_70804 | 2.2333  | 0.8578  | -1.38046384 | 3.57E-05    | ** |
| siR_70821 | 16.0943 | 4.8482  | -1.73102871 | 1.06E-39    | ** |
| siR_70823 | 6.3101  | 1.9393  | -1.70212687 | 3.83E-16    | ** |
| siR_70831 | 2.6233  | 0.8951  | -1.55126203 | 9.99E-07    | ** |
| siR_70834 | 0.01    | 1.0069  | 6.6537766   | 3.63E-09    | ** |
| siR_70882 | 14.18   | 5.0347  | -1.49387981 | 9.25E-29    | ** |
| siR_70901 | 24.8859 | 9.5472  | -1.38217898 | 5.23E-44    | ** |
| siR_70920 | 0.01    | 6.974   | 9.44584255  | 4.08E-59    | ** |
| siR_70933 | 1.028   | 0.1865  | -2.46259273 | 4.21E-05    | ** |

|           |         |         |             |             |    |
|-----------|---------|---------|-------------|-------------|----|
| siR_70937 | 2.3042  | 0.8951  | -1.36414517 | 3.16E-05    | ** |
| siR_70944 | 1.2407  | 0.2238  | -2.47087237 | 6.03E-06    | ** |
| siR_70964 | 22.5816 | 14.5819 | -0.630969   | 5.33E-12    |    |
| siR_70974 | 1.737   | 1.902   | 0.13091949  | 0.649636974 |    |
| siR_70975 | 2.6942  | 1.6782  | -0.68294229 | 0.011047805 |    |
| siR_70979 | 1.6307  | 0.9696  | -0.75002979 | 0.032577757 |    |
| siR_71004 | 1.418   | 0.4475  | -1.66389794 | 0.000170776 | ** |
| siR_71015 | 1.0989  | 0.5594  | -0.97410795 | 0.02925074  |    |
| siR_71052 | 0.01    | 2.163   | 7.75688986  | 7.63E-19    | ** |
| siR_71054 | 0.01    | 1.268   | 6.98641094  | 2.37E-11    | ** |
| siR_71060 | 0.01    | 12.4934 | 10.28695044 | 2.56E-105   | ** |
| siR_71066 | 10.9895 | 7.3469  | -0.5809182  | 8.02E-06    |    |
| siR_71111 | 31.1605 | 15.5888 | -0.99920851 | 2.38E-33    |    |
| siR_71113 | 2.3042  | 1.1188  | -1.04231379 | 0.000766813 | ** |
| siR_71173 | 3.2614  | 1.2307  | -1.40601227 | 3.82E-07    | ** |
| siR_71176 | 2.3042  | 2.0885  | -0.1417988  | 0.593202428 |    |
| siR_71219 | 0.01    | 8.6895  | 9.76312936  | 1.78E-73    | ** |
| siR_71220 | 0.01    | 5.5568  | 9.11811051  | 2.98E-47    | ** |
| siR_71223 | 0.01    | 3.3564  | 8.39077085  | 7.81E-29    | ** |
| siR_71235 | 1.3825  | 1.1561  | -0.25801329 | 0.462219879 |    |
| siR_71236 | 0.6735  | 1.1934  | 0.82532783  | 0.04634933  |    |
| siR_71239 | 0.01    | 3.8413  | 8.58545083  | 6.83E-33    | ** |
| siR_71246 | 0.01    | 1.4172  | 7.14689956  | 1.34E-12    | ** |
| siR_71264 | 1.8079  | 0.6713  | -1.42928533 | 0.000138786 | ** |
| siR_71286 | 1.418   | 0.6713  | -1.07882799 | 0.006897488 | ** |
| siR_71309 | 13.3646 | 7.4961  | -0.83420455 | 1.32E-11    |    |
| siR_71322 | 15.5625 | 10.2931 | -0.59639629 | 5.26E-08    |    |
| siR_71325 | 1.4534  | 0.7459  | -0.96237768 | 0.012720128 |    |
| siR_71334 | 2.0206  | 2.2749  | 0.17101938  | 0.519842672 |    |
| siR_71342 | 0.01    | 2.7225  | 8.08878824  | 1.58E-23    | ** |
| siR_71345 | 2.2688  | 1.268   | -0.83937469 | 0.005342929 |    |
| siR_71354 | 0.01    | 3.6175  | 8.49884921  | 5.10E-31    | ** |
| siR_71358 | 1.2407  | 0.5221  | -1.24875625 | 0.004597643 | ** |
| siR_71360 | 2.5878  | 0.5221  | -2.30932806 | 2.29E-10    | ** |
| siR_71396 | 3.864   | 1.8647  | -1.05115155 | 1.08E-05    | ** |
| siR_71411 | 2.6587  | 2.4614  | -0.11124187 | 0.650856778 |    |
| siR_71412 | 79.0888 | 59.5956 | -0.40826759 | 3.73E-18    |    |
| siR_71415 | 23.3261 | 13.3885 | -0.80095078 | 5.75E-18    |    |
| siR_71436 | 1.3825  | 0.4102  | -1.75288008 | 0.0001191   | ** |
| siR_71437 | 1.737   | 0.4102  | -2.08219836 | 1.23E-06    | ** |
| siR_71528 | 1.4889  | 1.0069  | -0.56432645 | 0.112816505 |    |
| siR_71543 | 15.6334 | 5.4822  | -1.51180471 | 4.47E-32    | ** |
| siR_71548 | 0.01    | 1.0442  | 6.70625425  | 1.77E-09    | ** |
| siR_71556 | 8.0117  | 5.4822  | -0.54735344 | 0.00030507  |    |
| siR_71559 | 1.3471  | 0.7832  | -0.78240428 | 0.044337712 |    |
| siR_71584 | 0.01    | 11.6357 | 10.18434229 | 3.88E-98    | ** |
| siR_71587 | 0.01    | 5.333   | 9.05880352  | 2.22E-45    | ** |

|           |         |         |             |             |    |
|-----------|---------|---------|-------------|-------------|----|
| siR_71588 | 0.01    | 4.8109  | 8.910163    | 5.22E-41    | ** |
| siR_7160  | 17.8668 | 13.2766 | -0.42839553 | 1.60E-05    |    |
| siR_71610 | 4.5021  | 1.1188  | -2.00864594 | 1.49E-14    | ** |
| siR_71613 | 5.3884  | 3.0954  | -0.7997311  | 3.53E-05    |    |
| siR_71626 | 0.01    | 2.2376  | 7.80580835  | 1.81E-19    | ** |
| siR_71628 | 3.4032  | 6.3773  | 0.90605381  | 5.07E-07    |    |
| siR_71639 | 1.6307  | 0.8951  | -0.86537062 | 0.015654369 |    |
| siR_71647 | 1.028   | 0.2984  | -1.78452082 | 0.000827671 | ** |
| siR_71658 | 12.6911 | 5.967   | -1.08873944 | 1.86E-16    | ** |
| siR_71663 | 1.2053  | 0.3356  | -1.84457766 | 0.000205328 | ** |
| siR_71682 | 1.9497  | 2.0512  | 0.07321601  | 0.788927836 |    |
| siR_71697 | 0.01    | 1.0815  | 6.75688986  | 8.62E-10    | ** |
| siR_71705 | 2.3042  | 0.8578  | -1.42555272 | 1.69E-05    | ** |
| siR_71720 | 6.0619  | 2.0139  | -1.589778   | 2.94E-14    | ** |
| siR_71722 | 1.0989  | 0.2984  | -1.88074067 | 0.000335467 | ** |
| siR_71733 | 1.3825  | 0.7459  | -0.89022535 | 0.022894115 |    |
| siR_7174  | 0.01    | 1.4545  | 7.18437949  | 6.51E-13    | ** |
| siR_71746 | 0.01    | 7.9436  | 9.63364917  | 3.12E-67    | ** |
| siR_71753 | 1.3116  | 0.634   | -1.04877306 | 0.011177638 | *  |
| siR_71754 | 10.2805 | 7.4588  | -0.46289498 | 0.000444394 |    |
| siR_71780 | 0.01    | 2.0885  | 7.70632333  | 3.21E-18    | ** |
| siR_71816 | 0.01    | 69.4785 | 12.76235089 | 0           | ** |
| siR_71822 | 0.01    | 10.2931 | 10.00746183 | 6.72E-87    | ** |
| siR_71825 | 1.2762  | 0.6713  | -0.92682489 | 0.023898405 |    |
| siR_71826 | 1.0635  | 0.4848  | -1.13335843 | 0.015328041 | *  |
| siR_7186  | 8.4371  | 3.431   | -1.29811807 | 1.26E-14    | ** |
| siR_71861 | 0.01    | 8.3165  | 9.69983269  | 2.36E-70    | ** |
| siR_71882 | 0.01    | 1.1561  | 6.85312238  | 2.05E-10    | ** |
| siR_71903 | 1.0635  | 0.634   | -0.74626529 | 0.087380955 |    |
| siR_71909 | 1.4889  | 0.634   | -1.23169211 | 0.002080356 | ** |
| siR_71911 | 3.0841  | 1.4545  | -1.08432625 | 5.64E-05    | ** |
| siR_71948 | 4.7148  | 1.3053  | -1.85281515 | 8.84E-14    | ** |
| siR_71951 | 4.7857  | 2.2376  | -1.0967778  | 3.91E-07    | ** |
| siR_71957 | 0.01    | 4.8855  | 8.93236241  | 1.24E-41    | ** |
| siR_71958 | 0.01    | 46.6173 | 12.18664973 | 0           | ** |
| siR_71961 | 30.7351 | 10.9271 | -1.49197661 | 2.74E-60    | ** |
| siR_71979 | 0.01    | 2.4241  | 7.9213054   | 4.98E-21    | ** |
| siR_72010 | 9.3588  | 1.529   | -2.61373515 | 7.20E-39    | ** |
| siR_72013 | 5.991   | 2.1258  | -1.49479096 | 5.08E-13    | ** |
| siR_72021 | 4.8212  | 2.4614  | -0.96991315 | 4.14E-06    |    |
| siR_72024 | 0.01    | 6.4891  | 9.34187459  | 4.67E-55    | ** |
| siR_72029 | 4.3249  | 1.3799  | -1.64810306 | 4.70E-11    | ** |
| siR_72044 | 8.5789  | 1.6409  | -2.38630535 | 2.29E-32    | ** |
| siR_72045 | 2.0561  | 1.0815  | -0.92687677 | 0.003959628 |    |
| siR_72059 | 19.3911 | 18.7961 | -0.0449613  | 0.614589808 |    |
| siR_72060 | 1.2762  | 1.268   | -0.00929969 | 0.98185728  |    |
| siR_72069 | 0.01    | 2.6479  | 8.04870483  | 6.67E-23    | ** |

|           |           |           |              |              |    |
|-----------|-----------|-----------|--------------|--------------|----|
| siR_72072 | 0. 01     | 1. 0815   | 6. 75688986  | 8. 62E-10    | ** |
| siR_72073 | 3. 9349   | 2. 7225   | -0. 53139492 | 0. 01394832  |    |
| siR_72092 | 1. 3825   | 0. 9323   | -0. 56841331 | 0. 124362438 |    |
| siR_72094 | 16. 9805  | 11. 9713  | -0. 50429911 | 1. 03E-06    |    |
| siR_72096 | 1. 7725   | 2. 2003   | 0. 31191461  | 0. 260871207 |    |
| siR_72109 | 0. 01     | 1. 7528   | 7. 45351758  | 2. 07E-15    | ** |
| siR_72110 | 62. 0374  | 45. 3493  | -0. 45205794 | 2. 83E-17    |    |
| siR_72116 | 6. 9482   | 5. 3703   | -0. 3716366  | 0. 018606144 |    |
| siR_72125 | 1. 2407   | 0. 5967   | -1. 05607663 | 0. 013149564 | *  |
| siR_72133 | 4. 7503   | 4. 065    | -0. 22476328 | 0. 228076095 |    |
| siR_72138 | 2. 446    | 1. 6409   | -0. 57593708 | 0. 037598826 |    |
| siR_72140 | 0. 01     | 2. 8716   | 8. 16571099  | 8. 93E-25    | ** |
| siR_72143 | 3. 3323   | 1. 6782   | -0. 98960363 | 0. 000101982 |    |
| siR_72144 | 4. 6794   | 2. 6479   | -0. 82147492 | 8. 07E-05    |    |
| siR_72162 | 586. 0586 | 189. 7139 | -1. 62721954 | 0            | ** |
| siR_72163 | 5. 6011   | 1. 7155   | -1. 70708106 | 1. 53E-14    | ** |
| siR_72169 | 171. 8968 | 111. 2849 | -0. 62728484 | 5. 30E-80    |    |
| siR_72170 | 1. 8079   | 0. 4102   | -2. 13991548 | 4. 70E-07    | ** |
| siR_72174 | 15. 0308  | 11. 0763  | -0. 44044576 | 4. 93E-05    |    |
| siR_72184 | 0. 01     | 6. 4145   | 9. 325193    | 1. 97E-54    | ** |
| siR_72190 | 12. 0884  | 13. 2393  | 0. 13120354  | 0. 230216036 |    |
| siR_72194 | 2. 3042   | 2. 536    | 0. 1382888   | 0. 580243003 |    |
| siR_72252 | 11. 7339  | 8. 8014   | -0. 41487767 | 0. 00069368  |    |
| siR_72253 | 2. 6942   | 2. 6479   | -0. 02500831 | 0. 918827197 |    |
| siR_72281 | 1. 7016   | 0. 3729   | -2. 19003124 | 7. 23E-07    | ** |
| siR_72285 | 0. 01     | 1. 3053   | 7. 02823761  | 1. 15E-11    | ** |
| siR_72303 | 1. 3471   | 0. 7832   | -0. 78240428 | 0. 044337712 |    |
| siR_72318 | 0. 01     | 1. 3426   | 7. 06888574  | 5. 63E-12    | ** |
| siR_72327 | 20. 6673  | 9. 3981   | -1. 1369089  | 1. 39E-27    | ** |
| siR_72340 | 1. 7725   | 0. 2984   | -2. 57046619 | 2. 67E-08    | ** |
| siR_72346 | 2. 9069   | 2. 3122   | -0. 33021525 | 0. 174666713 |    |
| siR_72347 | 52. 1823  | 34. 012   | -0. 61751669 | 7. 95E-25    |    |
| siR_72350 | 8. 508    | 7. 1231   | -0. 25631479 | 0. 066795176 |    |
| siR_72354 | 8. 118    | 6. 2281   | -0. 38233223 | 0. 008971019 |    |
| siR_72370 | 3. 4741   | 2. 4241   | -0. 51919007 | 0. 02379395  |    |
| siR_72383 | 5. 9201   | 3. 9159   | -0. 59627762 | 0. 000806843 |    |
| siR_72390 | 4. 5376   | 3. 2819   | -0. 46739816 | 0. 018802479 |    |
| siR_72408 | 2. 127    | 1. 1188   | -0. 92686787 | 0. 0033742   |    |
| siR_72411 | 1. 5598   | 0. 4848   | -1. 68589945 | 6. 78E-05    | ** |
| siR_72418 | 0. 01     | 7. 9436   | 9. 63364917  | 3. 12E-67    | ** |
| siR_72424 | 1. 8434   | 0. 5221   | -1. 81997109 | 4. 74E-06    | ** |
| siR_72427 | 9. 0397   | 1. 7528   | -2. 36661351 | 1. 05E-33    | ** |
| siR_72432 | 1. 9852   | 0. 7459   | -1. 41223023 | 7. 48E-05    | ** |
| siR_72443 | 0. 01     | 23. 8681  | 11. 22086801 | 1. 56E-200   | ** |
| siR_72457 | 1. 1698   | 0. 5594   | -1. 06430974 | 0. 015477614 | *  |
| siR_72466 | 786. 1027 | 264. 861  | -1. 56948238 | 0            | ** |
| siR_72467 | 12. 1593  | 4. 7736   | -1. 34891059 | 1. 44E-21    | ** |



|           |         |          |             |             |    |
|-----------|---------|----------|-------------|-------------|----|
| siR_72471 | 31.3023 | 13.3512  | -1.22929925 | 4.20E-46    | ** |
| siR_72484 | 1.9497  | 2.2003   | 0.17444809  | 0.518783978 |    |
| siR_72490 | 1.1698  | 0.4475   | -1.38630231 | 0.002893159 | ** |
| siR_72507 | 2.3042  | 1.4545   | -0.66374265 | 0.022044057 |    |
| siR_72511 | 2.1979  | 0.8951   | -1.29600497 | 9.36E-05    | ** |
| siR_72513 | 2.5169  | 0.9696   | -1.37618629 | 1.18E-05    | ** |
| siR_72517 | 0.01    | 3.2819   | 8.35838747  | 3.29E-28    | ** |
| siR_72526 | 3.4741  | 1.4545   | -1.25611599 | 1.52E-06    | ** |
| siR_72538 | 1.737   | 0.9323   | -0.89773158 | 0.01004128  |    |
| siR_72542 | 0.01    | 24.0172  | 11.22985225 | 8.80E-202   | ** |
| siR_72543 | 0.01    | 1.0069   | 6.6537766   | 3.63E-09    | ** |
| siR_72552 | 0.01    | 1.5663   | 7.29121675  | 7.54E-14    | ** |
| siR_72555 | 0.01    | 1.7528   | 7.45351758  | 2.07E-15    | ** |
| siR_72559 | 8.118   | 2.6106   | -1.63674292 | 2.48E-19    | ** |
| siR_72561 | 2.0561  | 0.2611   | -2.97723607 | 8.78E-11    | ** |
| siR_72564 | 0.01    | 2.1258   | 7.73186206  | 1.57E-18    | ** |
| siR_72584 | 19.1075 | 6.0789   | -1.65225684 | 5.98E-44    | ** |
| siR_72590 | 2.0915  | 1.0069   | -1.05461759 | 0.001221576 | ** |
| siR_72593 | 0.01    | 2.797    | 8.12773644  | 3.76E-24    | ** |
| siR_72600 | 2.446   | 1.6036   | -0.60911008 | 0.028796183 |    |
| siR_72606 | 10.3159 | 6.5637   | -0.65228849 | 1.61E-06    |    |
| siR_72619 | 0.01    | 1.8274   | 7.51364865  | 4.92E-16    | ** |
| siR_72622 | 5.1048  | 4.4753   | -0.18987004 | 0.28818051  |    |
| siR_72623 | 0.01    | 1.7155   | 7.42248532  | 4.25E-15    | ** |
| siR_72642 | 0.6381  | 1.0442   | 0.71054362  | 0.101902462 |    |
| siR_72656 | 15.2789 | 8.2419   | -0.89049182 | 2.03E-14    |    |
| siR_72659 | 2.0561  | 0.8578   | -1.26119721 | 0.000217801 | ** |
| siR_72679 | 6.2392  | 2.797    | -1.1574808  | 1.41E-09    | ** |
| siR_72680 | 0.01    | 2.7225   | 8.08878824  | 1.58E-23    | ** |
| siR_72684 | 1.0989  | 0.4848   | -1.1805985  | 0.010852128 | *  |
| siR_72695 | 0.01    | 1.7155   | 7.42248532  | 4.25E-15    | ** |
| siR_72699 | 0.01    | 6.7875   | 9.40673648  | 1.49E-57    | ** |
| siR_72704 | 0.01    | 3.0954   | 8.27398204  | 1.20E-26    | ** |
| siR_72748 | 2.1624  | 1.4918   | -0.53557929 | 0.067342783 |    |
| siR_7275  | 2.1979  | 1.1934   | -0.88104807 | 0.00428766  |    |
| siR_72763 | 95.0413 | 73.9164  | -0.36266008 | 1.51E-17    |    |
| siR_72764 | 2.2688  | 3.8413   | 0.7596652   | 0.000811247 |    |
| siR_72779 | 0.01    | 5.7805   | 9.17505048  | 3.99E-49    | ** |
| siR_72780 | 0.01    | 1.6782   | 7.39077085  | 8.72E-15    | ** |
| siR_72786 | 0.01    | 94.7264  | 13.20955084 | 0           | ** |
| siR_72787 | 0.01    | 1.268    | 6.98641094  | 2.37E-11    | ** |
| siR_7279  | 1.4534  | 0.5967   | -1.28435413 | 0.001680536 | ** |
| siR_72794 | 0.01    | 45.312   | 12.14567746 | 0           | ** |
| siR_72801 | 0.01    | 5.6687   | 9.14687411  | 3.45E-48    | ** |
| siR_72805 | 0.01    | 104.9822 | 13.35785712 | 0           | ** |
| siR_72850 | 0.01    | 10.5915  | 10.04869121 | 2.14E-89    | ** |
| siR_72881 | 2.2688  | 0.7832   | -1.53447677 | 6.54E-06    | ** |

|           |         |         |             |             |    |
|-----------|---------|---------|-------------|-------------|----|
| siR_72882 | 7.799   | 2.3868  | -1.70821147 | 1.07E-19    | ** |
| siR_72886 | 2.0206  | 2.0139  | -0.0047917  | 0.988505348 |    |
| siR_72887 | 1.1698  | 0.4102  | -1.5118625  | 0.001486275 | ** |
| siR_72895 | 7.1609  | 2.6479  | -1.43529228 | 1.79E-14    | ** |
| siR_72902 | 0.01    | 4.4753  | 8.80584059  | 3.37E-38    | ** |
| siR_72912 | 15.6689 | 6.0043  | -1.38383594 | 2.30E-28    | ** |
| siR_72915 | 1.4889  | 1.1188  | -0.4122947  | 0.234339555 |    |
| siR_72924 | 0.01    | 1.0815  | 6.75688986  | 8.62E-10    | ** |
| siR_72928 | 2.2688  | 0.4848  | -2.22646783 | 6.67E-09    | ** |
| siR_72940 | 0.01    | 1.8274  | 7.51364865  | 4.92E-16    | ** |
| siR_72943 | 0.01    | 2.7597  | 8.10836763  | 7.72E-24    | ** |
| siR_72962 | 1.028   | 0.8205  | -0.32526503 | 0.431150137 |    |
| siR_72968 | 2.446   | 1.0069  | -1.28050399 | 4.39E-05    | ** |
| siR_72974 | 18.2567 | 19.7285 | 0.11185526  | 0.210277031 |    |
| siR_72987 | 1.8079  | 2.163   | 0.25871878  | 0.350519128 |    |
| siR_73020 | 1.2053  | 0.2984  | -2.01407284 | 8.31E-05    | ** |
| siR_73046 | 20.4901 | 13.1647 | -0.63825238 | 3.22E-11    |    |
| siR_73078 | 31.0896 | 14.6565 | -1.08489143 | 7.91E-38    | ** |
| siR_73083 | 1.7016  | 1.1934  | -0.51181426 | 0.120249063 |    |
| siR_73096 | 0.01    | 1.0442  | 6.70625425  | 1.77E-09    | ** |
| siR_73101 | 1.1698  | 0.2238  | -2.38597995 | 1.70E-05    | ** |
| siR_73107 | 1.418   | 0.8205  | -0.78928229 | 0.037521829 |    |
| siR_73118 | 0.8153  | 1.1561  | 0.50386327  | 0.204958771 |    |
| siR_73133 | 0.01    | 7.8317  | 9.61318169  | 2.70E-66    | ** |
| siR_73134 | 0.01    | 1.6782  | 7.39077085  | 8.72E-15    | ** |
| siR_73135 | 0.01    | 1.0069  | 6.6537766   | 3.63E-09    | ** |
| siR_73136 | 0.01    | 1.0069  | 6.6537766   | 3.63E-09    | ** |
| siR_73137 | 0.01    | 1.0069  | 6.6537766   | 3.63E-09    | ** |
| siR_7315  | 5.5302  | 1.7528  | -1.65767027 | 7.50E-14    | ** |
| siR_73152 | 2.5878  | 1.3799  | -0.9071624  | 0.001471061 |    |
| siR_73153 | 1.0989  | 0.5221  | -1.07366204 | 0.018227899 | *  |
| siR_73175 | 0.01    | 4.8855  | 8.93236241  | 1.24E-41    | ** |
| siR_73176 | 0.01    | 1.0069  | 6.6537766   | 3.63E-09    | ** |
| siR_73188 | 1.8079  | 0.9323  | -0.95544871 | 0.005637862 |    |
| siR_73227 | 0.01    | 8.6895  | 9.76312936  | 1.78E-73    | ** |
| siR_73235 | 1.1344  | 1.0442  | -0.11953137 | 0.754361807 |    |
| siR_73238 | 12.7265 | 13.2766 | 0.06105003  | 0.571051691 |    |
| siR_73242 | 1.1344  | 0.9323  | -0.28306327 | 0.468279224 |    |
| siR_73254 | 2.0561  | 0.9696  | -1.08444883 | 0.001041136 | ** |
| siR_73259 | 1.5243  | 0.8578  | -0.82943365 | 0.024298572 |    |
| siR_73262 | 3.3677  | 0.9696  | -1.79630202 | 7.29E-10    | ** |
| siR_73299 | 0.5672  | 1.2307  | 1.11754969  | 0.00925153  | ** |
| siR_73317 | 0.01    | 3.2073  | 8.32521549  | 1.38E-27    | ** |
| siR_73324 | 0.01    | 33.2661 | 11.69983702 | 3.34E-279   | ** |
| siR_73328 | 0.01    | 3.5802  | 8.48389637  | 1.05E-30    | ** |
| siR_73340 | 5.3884  | 1.5663  | -1.78249639 | 8.01E-15    | ** |
| siR_73343 | 1.2762  | 0.1492  | -3.096535   | 2.35E-07    | ** |

|           |          |         |             |             |    |
|-----------|----------|---------|-------------|-------------|----|
| siR_73351 | 23.4679  | 7.0858  | -1.7276861  | 5.69E-57    | ** |
| siR_73358 | 1.3471   | 0.5967  | -1.17477927 | 0.004838592 | ** |
| siR_73374 | 1.028    | 0.4475  | -1.19988068 | 0.012673013 | *  |
| siR_73382 | 3.0132   | 0.634   | -2.24874169 | 1.58E-11    | ** |
| siR_73384 | 1.028    | 0.1119  | -3.19955832 | 2.76E-06    | ** |
| siR_73401 | 4.0058   | 1.7528  | -1.192429   | 7.08E-07    | ** |
| siR_73403 | 1.2762   | 0.5221  | -1.28945638 | 0.003202105 | ** |
| siR_73414 | 1.9497   | 1.1561  | -0.75398596 | 0.018682205 |    |
| siR_73428 | 0.01     | 25.9192 | 11.33980547 | 1.06E-217   | ** |
| siR_73432 | 0.01     | 2.6852  | 8.06888574  | 3.25E-23    | ** |
| siR_73444 | 0.01     | 1.7528  | 7.45351758  | 2.07E-15    | ** |
| siR_73471 | 0.01     | 9.8829  | 9.94879063  | 1.82E-83    | ** |
| siR_73472 | 0.01     | 9.2862  | 9.85894454  | 1.80E-78    | ** |
| siR_73474 | 0.01     | 2.8343  | 8.14684866  | 1.83E-24    | ** |
| siR_73477 | 0.01     | 1.7528  | 7.45351758  | 2.07E-15    | ** |
| siR_73504 | 0.01     | 12.1951 | 10.25208587 | 8.05E-103   | ** |
| siR_73511 | 5.3884   | 7.5707  | 0.49056975  | 0.001447466 |    |
| siR_73520 | 2.9423   | 1.7528  | -0.74728296 | 0.004041126 |    |
| siR_73531 | 16.4488  | 2.3122  | -2.83064424 | 5.23E-73    | ** |
| siR_73532 | 9.4651   | 2.2003  | -2.10491751 | 1.07E-30    | ** |
| siR_73541 | 1.3116   | 0.8578  | -0.61261459 | 0.109565176 |    |
| siR_73562 | 6.4873   | 2.4241  | -1.42016894 | 4.62E-13    | ** |
| siR_73569 | 0.01     | 2.5733  | 8.00747585  | 2.81E-22    | ** |
| siR_73576 | 1.5243   | 0.7832  | -0.9606942  | 0.010795924 |    |
| siR_73589 | 0.01     | 1.0815  | 6.75688986  | 8.62E-10    | ** |
| siR_73604 | 0.01     | 1.529   | 7.2564446   | 1.55E-13    | ** |
| siR_73616 | 1.1344   | 2.2376  | 0.98002272  | 0.001540966 |    |
| siR_7364  | 22.0144  | 14.209  | -0.6316425  | 9.39E-12    |    |
| siR_73641 | 11.5212  | 4.065   | -1.50296373 | 7.35E-24    | ** |
| siR_73644 | 1.5598   | 0.2611  | -2.57868669 | 1.81E-07    | ** |
| siR_73654 | 1.3825   | 0.6713  | -1.04224993 | 0.00950628  | ** |
| siR_73656 | 20.3128  | 10.5542 | -0.94457189 | 1.87E-20    |    |
| siR_73670 | 2.6233   | 0.7459  | -1.81432867 | 4.63E-08    | ** |
| siR_73672 | 2.4815   | 1.9766  | -0.32819151 | 0.212890648 |    |
| siR_73676 | 1.3471   | 2.3495  | 0.80249682  | 0.006116666 |    |
| siR_73689 | 1.6661   | 0.5221  | -1.67407693 | 4.12E-05    | ** |
| siR_73695 | 1.1344   | 0.7086  | -0.67888607 | 0.103795176 |    |
| siR_73715 | 0.01     | 11.4865 | 10.16572355 | 6.88E-97    | ** |
| siR_73720 | 0.01     | 1.4172  | 7.14689956  | 1.34E-12    | ** |
| siR_73729 | 1.2053   | 0.634   | -0.92683753 | 0.028276658 |    |
| siR_73745 | 0.01     | 5.1838  | 9.01786625  | 3.94E-44    | ** |
| siR_73749 | 0.01     | 8.3911  | 9.71271614  | 5.60E-71    | ** |
| siR_73760 | 2.4815   | 0.7459  | -1.73415832 | 2.61E-07    | ** |
| siR_73761 | 17.5832  | 3.6921  | -2.25168412 | 2.09E-60    | ** |
| siR_73762 | 1.9143   | 0.4848  | -1.98135534 | 7.91E-07    | ** |
| siR_73778 | 0.01     | 5.6687  | 9.14687411  | 3.45E-48    | ** |
| siR_73782 | 319.8649 | 131.349 | -1.28405747 | 0           | ** |

|           |         |         |             |             |    |
|-----------|---------|---------|-------------|-------------|----|
| siR_73783 | 0.1418  | 1.1934  | 3.07314824  | 5.11E-07    | ** |
| siR_7379  | 1.0635  | 0.4102  | -1.37442064 | 0.004842593 | ** |
| siR_73818 | 0.01    | 1.3053  | 7.02823761  | 1.15E-11    | ** |
| siR_73845 | 2.446   | 1.1188  | -1.12847224 | 0.00021702  | ** |
| siR_73859 | 4.2185  | 2.6479  | -0.67188146 | 0.001680598 |    |
| siR_73879 | 0.8153  | 2.9089  | 1.83507078  | 5.24E-09    | ** |
| siR_73899 | 22.8652 | 12.2697 | -0.89805356 | 4.21E-21    |    |
| siR_73903 | 5.9201  | 2.9835  | -0.98861577 | 2.14E-07    |    |
| siR_73917 | 1.2762  | 0.4475  | -1.51189485 | 0.000890445 | ** |
| siR_73932 | 1.3825  | 0.4102  | -1.75288008 | 0.0001191   | ** |
| siR_73934 | 3.3677  | 0.5967  | -2.49668594 | 3.24E-14    | ** |
| siR_7396  | 3.8286  | 2.4614  | -0.63733781 | 0.004305484 |    |
| siR_73971 | 6.9127  | 2.4614  | -1.48977019 | 9.74E-15    | ** |
| siR_73991 | 2.446   | 1.0069  | -1.28050399 | 4.39E-05    | ** |
| siR_73992 | 3.6159  | 2.8716  | -0.33249998 | 0.127115879 |    |
| siR_73998 | 0.1418  | 1.4918  | 3.39512469  | 3.58E-09    | ** |
| siR_74013 | 28.9272 | 27.0008 | -0.09942453 | 0.177261375 |    |
| siR_74017 | 0.01    | 39.718  | 11.95557726 | 0           | ** |
| siR_74029 | 4.2185  | 2.3868  | -0.82165242 | 0.000182238 |    |
| siR_74031 | 1.737   | 1.0442  | -0.73419969 | 0.030251896 |    |
| siR_74045 | 1.3471  | 1.2307  | -0.13037782 | 0.709114022 |    |
| siR_74060 | 1.1344  | 0.5967  | -0.92685176 | 0.033495577 |    |
| siR_74065 | 0.01    | 1.268   | 6.98641094  | 2.37E-11    | ** |
| siR_74079 | 2.8005  | 0.5221  | -2.42328636 | 1.11E-11    | ** |
| siR_74084 | 1.1698  | 1.4545  | 0.3142614   | 0.358047473 |    |
| siR_74086 | 2.127   | 2.0885  | -0.02635289 | 0.924470125 |    |
| siR_74087 | 1.737   | 2.3495  | 0.43575601  | 0.112391577 |    |
| siR_74097 | 1.2762  | 0.7086  | -0.84881107 | 0.035970454 |    |
| siR_74099 | 0.01    | 4.8855  | 8.93236241  | 1.24E-41    | ** |
| siR_74122 | 3.9349  | 2.0885  | -0.91385983 | 7.66E-05    |    |
| siR_74128 | 1.2762  | 1.0442  | -0.28945638 | 0.431071015 |    |
| siR_74137 | 1.9497  | 0.9323  | -1.06438598 | 0.001667436 | ** |
| siR_74174 | 10.6704 | 9.1743  | -0.21794427 | 0.078750742 |    |
| siR_74211 | 0.01    | 1.1188  | 6.80580835  | 4.20E-10    | ** |
| siR_74213 | 5.2466  | 2.5733  | -1.02776314 | 4.66E-07    | ** |
| siR_74215 | 0.01    | 7.7944  | 9.60629416  | 5.54E-66    | ** |
| siR_74227 | 1.5952  | 1.1561  | -0.46447112 | 0.168934119 |    |
| siR_74269 | 1.4534  | 0.7459  | -0.96237768 | 0.012720128 |    |
| siR_74292 | 0.01    | 1.902   | 7.57137344  | 1.17E-16    | ** |
| siR_74298 | 0.01    | 1.4172  | 7.14689956  | 1.34E-12    | ** |
| siR_74305 | 1.4889  | 0.4475  | -1.73428727 | 7.26E-05    | ** |
| siR_74321 | 1.3116  | 0.4102  | -1.67692841 | 0.000282277 | ** |
| siR_74335 | 0.01    | 5.2957  | 9.04867759  | 4.56E-45    | ** |
| siR_74346 | 0.01    | 1.6409  | 7.35834351  | 1.79E-14    | ** |
| siR_7435  | 0.01    | 2.797   | 8.12773644  | 3.76E-24    | ** |
| siR_74358 | 1.4534  | 0.7832  | -0.89197914 | 0.019383579 |    |
| siR_74366 | 26.4457 | 17.2671 | -0.61500736 | 2.98E-13    |    |

|           |          |         |             |             |    |
|-----------|----------|---------|-------------|-------------|----|
| siR_74367 | 1.6661   | 0.9323  | -0.83760882 | 0.017480007 |    |
| siR_74372 | 1.4534   | 0.9696  | -0.58397021 | 0.106236151 |    |
| siR_74386 | 4.8921   | 1.902   | -1.36293665 | 1.16E-09    | ** |
| siR_74388 | 0.01     | 1.1934  | 6.89893387  | 9.98E-11    | ** |
| siR_74407 | 27.261   | 11.4865 | -1.24689922 | 3.05E-41    | ** |
| siR_74418 | 1.0989   | 0.3356  | -1.71124549 | 0.000775199 | ** |
| siR_74432 | 2.8714   | 1.6036  | -0.84044    | 0.001678155 |    |
| siR_74433 | 1.1344   | 0.3356  | -1.75711482 | 0.000500636 | ** |
| siR_74439 | 2.0915   | 0.9323  | -1.16567183 | 0.000456163 | ** |
| siR_7444  | 0.01     | 3.0954  | 8.27398204  | 1.20E-26    | ** |
| siR_7448  | 117.9774 | 40.0909 | -1.55716381 | 1.13E-240   | ** |
| siR_74499 | 12.053   | 3.2446  | -1.89327974 | 7.28E-34    | ** |
| siR_74500 | 2.127    | 0.3729  | -2.51195933 | 1.67E-09    | ** |
| siR_74504 | 1.2053   | 0.634   | -0.92683753 | 0.028276658 |    |
| siR_74559 | 1.1344   | 0.4475  | -1.34196985 | 0.004230483 | ** |
| siR_74579 | 1.7016   | 0.634   | -1.42433719 | 0.000229134 | ** |
| siR_74589 | 12.6556  | 10.405  | -0.28249894 | 0.014096009 |    |
| siR_74593 | 13.5773  | 10.405  | -0.38391965 | 0.00068528  |    |
| siR_746   | 3.6868   | 2.2003  | -0.74466891 | 0.00131885  |    |
| siR_74612 | 2.1624   | 1.2307  | -0.81315429 | 0.008149142 |    |
| siR_74615 | 17.2996  | 6.4518  | -1.42296506 | 2.03E-32    | ** |
| siR_74617 | 1.2053   | 0.2611  | -2.20671792 | 3.06E-05    | ** |
| siR_74637 | 1.6661   | 1.3799  | -0.27191127 | 0.394919975 |    |
| siR_74650 | 2.2333   | 2.8716  | 0.36267774  | 0.138694904 |    |
| siR_74688 | 0.01     | 1.2307  | 6.94333532  | 4.86E-11    | ** |
| siR_74701 | 2.1979   | 0.634   | -1.793571   | 7.22E-07    | ** |
| siR_74715 | 3.1196   | 4.2142  | 0.43389773  | 0.03392867  |    |
| siR_74726 | 0.01     | 4.4007  | 8.78158921  | 1.42E-37    | ** |
| siR_74731 | 0.01     | 1.3426  | 7.06888574  | 5.63E-12    | ** |
| siR_74747 | 30.8415  | 27.9331 | -0.14289724 | 0.046856913 |    |
| siR_74757 | 2.5524   | 0.6713  | -1.92682489 | 1.99E-08    | ** |
| siR_74761 | 3.0132   | 1.0069  | -1.58137602 | 1.03E-07    | ** |
| siR_748   | 1.2762   | 0.7086  | -0.84881107 | 0.035970454 |    |
| siR_74846 | 1.5598   | 1.3053  | -0.25697963 | 0.435948228 |    |
| siR_74869 | 0.01     | 4.699   | 8.87620996  | 4.51E-40    | ** |
| siR_74881 | 9.8905   | 5.8924  | -0.74718809 | 1.22E-07    |    |
| siR_74912 | 0.01     | 1.1561  | 6.85312238  | 2.05E-10    | ** |
| siR_7493  | 13.5419  | 2.9462  | -2.2005029  | 1.24E-45    | ** |
| siR_74948 | 5.9201   | 4.1769  | -0.50318894 | 0.004058777 |    |
| siR_74957 | 9.3233   | 3.3192  | -1.49000513 | 2.27E-19    | ** |
| siR_74969 | 0.01     | 4.9228  | 8.94333532  | 6.04E-42    | ** |
| siR_74976 | 0.01     | 1.3426  | 7.06888574  | 5.63E-12    | ** |
| siR_74977 | 0.01     | 5.706   | 9.15633594  | 1.68E-48    | ** |
| siR_74980 | 0.01     | 2.6479  | 8.04870483  | 6.67E-23    | ** |
| siR_74984 | 8.5789   | 7.6825  | -0.15921681 | 0.245065239 |    |
| siR_75060 | 1.4534   | 0.7086  | -1.03638844 | 0.008088782 | ** |
| siR_75066 | 3.0487   | 2.4241  | -0.33074498 | 0.163734794 |    |

---

**Supplementary Table 1. Forward primers used in qRT-PCR for miRNA abundance analysis.** Uni-miR qPCR Primer supplied by the SYBR® PrimeScript® miRNA qPCR Starter Kit was used as reverse primer.

| <b>MiRNA-name</b> | <b>Primer sequence (5'-3')</b> |
|-------------------|--------------------------------|
| mul-miR6440b      | GCGGAGTTTGATTGAGTTCCGGTT       |
| mul-miR530-5p     | GTGCGTTTGACCTGCACCT            |
| mul-miR157a-5p    | GGGCTTGACAGAAGATAGAGAGCAC      |
| mul-miR157d-3p    | GGGCTCTCTATGCTTCTGTCATCC       |
| mul-miR156a-5p    | GCGTGACAGAAGAGAGTGAGCAC        |
| mul-miR169a-3p    | GGTGCCAAGTTGTTCTTGGCTAC        |
| mul-miR393-5p     | GTCCAAAGGGATCGCATTGATC         |
| mul-miR391-5p     | TGTCGCAGGAGAGATGGCGAA          |
| mul-miR160a-5p    | GCCTGGCTCCCTGTATGCCA           |
| mul-miR447b-5p    | GGCACTCTCACTCAAGGGCTTCA        |
| mul-miR479        | GGCGTGATATTGATTGGCTCATA        |
| mul-miR5658       | GGCATGATGCTGATAATGATGACAA      |
| mul-miR418        | GGGCTAATCTGATGATAGATGGACG      |
| mul-miR858b       | GCTTCGTTGTCTGTTCCGACCTTG       |
| mul-miR4414a-5p   | GAGCTGCTGACTCGTTGGTTCA         |
| mul-miR166h-3p    | TCTCGGACCAGGCTTCATTCC          |
| mul-miR415        | AAGGAGCAGAGCAGAGCAG            |
| mul-miR408b-5p    | CAGGGAACGGACAGAGCATGG          |
| mul-miR396b-3p    | GGCTCAAGAAAGCTGTGGGAGA         |
| mul-miR2111a-5p   | GGCGTAATCTGCATCCTGAGGTTTA      |
| mul-miR164a-5p    | TGGAGAAGCAGGGCACGTG            |
| mul-miR395a-3p    | GTGAAGTGTGTTGGGGAACTCC         |
| mul-miR172a-3p    | GGCAGAATCTTGATGATGCTGCAT       |
| mul-miR2087-5p    | GCGAAGAAAGAACCAGCAGTCAT        |
| mul-miRn1-5p      | GGGCGGTATAACAATGACTTTAT        |
| mul-miRn3-3p      | GGCGTGGTGATCAATTGGACCT         |
| mul-miRn6-5p      | TAAGCCCGCTACATATGGGATT         |
| mul-miRn14-5p     | GGCGCTACCAGCCGAGTAGAAGT        |
| mul-miRn11-5p     | GGCGTTAGGATCCTGGTTGAGTC        |
| mul-miRn10-3p     | AGGTGCAGATGCAGATGCAGG          |
| mul-miRn9-5p      | GGCAGGGGTTACCTGAGAATACATG      |
| mul-miRn12-3p     | TCTTCCGAGACCTCCCATACC          |

---

|               |                          |
|---------------|--------------------------|
| mul-miRn1-3p  | GGCGGCTTGAAGTCGTTGTTATAC |
| mul-miRn19-5p | AACTCGGTGCTGGAATCGGTC    |
| mul-miRn18-5p | GGGCTGCAATCATAACTCGGAG   |
| mul-miRn17-5p | GGCTGACACAAGATCATCCTCC   |
| mul-miRn20-5p | GGCAGGAGGAGGAGGAGGAGTT   |
| U6            | ATGGCCCTGCGTAAGGATG      |

---

**Supplementary Table 2. Primers used in qRT-PCR for abundance analysis for predicted target, pri-miR393a and pri-miR393b.**

| <b>Gene</b>                                 | <b>Forward primer (5'-3')</b> | <b>Reverse primer (5'-3')</b> |
|---------------------------------------------|-------------------------------|-------------------------------|
| Actin                                       | CAGTGCTTCTCACTGAGGCTC         | GGAAGAGGACTTCTGGGCATC         |
| Promoter-binding protein SPL 9              | GGAAAGTTTCTTCCTTATCCAT        | TGACGATGGTCGGTTTCTGG          |
| Auxin response factor 10                    | TTCTTCAGGTGTCATGGGAT          | CTCCAAATAGAACATGCCTG          |
| CBL-interacting protein kinase              | ATCACAAATCCAGGCGATCAT         | TTAGCCATGCTCTCCAGCTT          |
| Class III HD-Zip protein 5                  | GCAACCAAAGACACAAGTTGT         | AATAGCAACGATTCCAATGG          |
| Phosphatidylinositol 4-kinase               | CTTGCAGAGATCAATCAACAT         | TGGAAGTAGTGCATCTCCAT          |
| NBS-LRR resistance protein                  | GGAATAGATTCTCGCATAACG         | AGAGACGGGTTTGCATACGAA         |
| Transcription factor MYB884                 | AAGATTCGTGCCTGCAACAG          | AGATCCACAAGAAATGCTAAGC        |
| Pentatricopeptide repeat-containing protein | ATCACCACCGCCATTACAAGT         | CAGGAGGTCCGATTTGATGAG         |
| C2H2L domain class transcription factor     | AGGAGTGCTATTACTACAACGCT       | CAGAAGAAGGAGACGACACG          |
| S-formylglutathione hydrolase               | CTGACCTGCACAGATGAGAAT         | GATGCTCGTGATGTATCAAGC         |
| Pri-miR393a                                 | TAATAAGGCAGGTGATGAAGGT        | GTAAGCAAGCAAAGGAGGAAT         |
| Pri-miR393b                                 | TTCTTAGTGCAGGTGGAGACTT        | CTGGATTAAAGATCGCGAGT          |
